# Supplementary material for: Guominkang formula alleviate inflammation in eosinophilic asthma by regulating immune balance of Th1/2 and Treg/Th17 cells
Source: Front Pharmacol. 2022 Oct 14;13:978421. doi: 10.3389/fphar.2022.978421 (PMC9624229; doi:10.3389/fphar.2022.978421)
Supplement: Supplementary file 1 [file Table3.XLSX]

## Sheet: Figure 1(B)
Methacholine(mg/ml)	0	6.25	12.5	25	50
	0.808	0.964	0.874	0.996667	1.32	PBS1
	0.815	0.8	0.796667	0.8375	0.698	PBS2
	0.715	0.6525	0.675	0.6525	0.635	PBS3
	0.696375	0.74225	0.781889	0.828889	0.884333	Mean
	1.16029	1.29875	1.11781	1.20241	1.49265	PBS1 ratio
	1.17035	1.0778	1.0189	1.01039	0.789295	PBS2 ratio
	1.02675	0.879084	0.863294	0.787198	0.718055	PBS3 ratio
	0.808	4.654	4.33	4.60667	7.138	Model1
	0.666667	1.132	2.725	3.405	6.5	Model2
	0.933333	1.84	3.9025	5.18	6.035	Model3
	1.0025	1.27333	2.4325	3.805	5.1	Model4
	0.875	1.7375	3.738	4.3275	5.778	Model5
	1.16029	6.27012	5.53787	5.55764	8.07162	Model1 ratio
	0.957339	1.52509	3.48515	4.10791	7.35017	Model2 ratio
	1.34027	2.47895	4.99112	6.24933	6.82435	Model3 ratio
	1.25651	2.34086	4.78073	5.22084	6.53374	Model4 ratio
	1.4396	1.7155	3.11106	4.59048	5.76706	Model5 ratio
	0.646667	1.12667	1.26	2.64111	2.68	GMK(H)1
	0.516	1.882	1.92	2.522	2.646	GMK(H)2
	1.058	1.494	1.725	2.07667	2.632	GMK(H)3
	0.695	1.08333	1.60333	2.005	2.58667	GMK(H)4
	0.85	1.292	1.505	1.99667	2.5175	GMK(H)5
	0.928618	1.51791	1.61148	3.18633	3.03053	GMK(H) 1 ratio
	0.74098	2.53553	2.45559	3.04263	2.99208	GMK(H) 2 ratio
	1.5193	2.0128	2.2062	2.50536	2.97625	GMK(H) 3 ratio
	0.998025	1.45953	2.05059	2.4189	2.92499	GMK(H) 4 ratio
	1.22061	1.74065	1.92483	2.40885	2.84678	GMK(H) 5 ratio
	0.476	1.57667	2.05667	2.02	3.55	GMK(M)1
	0.93	1.214	1.63	2.2225	3.246	GMK(M)2
	0.6025	0.6775	0.988	2.33	3.04833	GMK(M)3
	0.8625	1.3725	1.54	2.00333	2.99333	GMK(M)4
	0.923333	1.508	2.2625	2.38333	2.776	GMK(M)5
	0.68354	2.12417	2.63038	2.437	4.01432	GMK(M)1 ratio
	1.33549	1.63557	2.0847	2.6813	3.67056	GMK(M)2 ratio
	0.865195	0.912765	1.26361	2.81099	3.44704	GMK(M)3 ratio
	1.23856	1.84911	1.96959	2.41689	3.38485	GMK(M)4 ratio
	1.32591	2.03166	2.89363	2.87534	3.13909	GMK(M)5 ratio
	0.472	1.3275	1.285	2.05667	2.595	GMK(L)1
	0.566	1.156	1.29667	1.4975	2.56	GMK(L)2
	0.79	1.2475	2.0175	2.3925	2.77333	GMK(L)3
	0.79	1.29	2.0175	2.63556	2.77333	GMK(L)4
	0.677796	1.78848	1.64346	2.48123	2.93441	GMK(L)1 ratio
	0.81278	1.55743	1.65838	1.80664	2.89484	GMK(L)2 ratio
	1.13445	1.6807	2.58029	2.88639	3.13607	GMK(L)3 ratio
	1.13445	1.73796	2.58029	3.17962	3.13607	GMK(L)4 ratio

## Sheet: Figure 1(C)
Inflammatory score	Control	Model	GMK(H)	GMK(M)	GMK(L)	DEX
	0	4	1	2	3	1
	0	4	1	3	2	1
	0	3	2	2	3	2
	0	4	2	3	3	1
	0	3	3	2	2	2
	0	4	2	2	2	2

## Sheet: Figure 1(D)
PAS score	Control	Model	GMK(H)	GMK(M)	GMK(L)	DEX
	0	75	25	50	45	15
	0	80	40	30	55	0
	0	55	20	35	52	25
	0	65	23	42	36	23
	0	70	27	34	38	22
	0	62	40	29	36	0

## Sheet: Figure 1(E)
Eosinophil (×105/ml)	Control	Model	GMK(H)）	GMK(M)	GMK(L)	DEX
	0.01	8.7	0.5	3.4	4.1	2.2
	0.01	9.2	0.7	2.7	4.2	2.7
	0.02	10.6	2.1	2.6	2.8	3.5
	0.02	9.5	1.2	1.9	6.2	2.6
	0.02	10.2	1.5	2.1	5.1	3.2
		10.8	2.3
OVA-IgE (ng/ml)	Control	Model	GMK(H)	GMK(M)	GMK(L)	DEX
	5.12648	4458.07	971.751	2200.47	2831.08	2385.29
	4.0064	4327.02	1379.46	2459.77	2712.35	2047.02
	1.76625	4695.53	1632.6	2403.21	2955.4	1779.33
	2.88632	4312.46	2163.51	2244.16	2603.14	1742.92
	0.646175	3905.87	1250.09	2400.97	3003.57	1299.37
	4.56644		2028.54	2417.21	3015.89
IL-5 (pg/ml)	Control	Model	GMK(H)	GMK(M)	GMK(L)	DEX
	6.87	308.3	36.76	130.61	184.79	48.13
	14.12	320.97	40.83	155.31	155.31	107.77
	17.78	348.07	56.56	171.03	161.41	125.69
	21.06	436.69	82.22	181.25	224.52	146.59
	30.96	657.56	62.48	203.64	247.7	155.31
			80.64
IL-13 (pg/ml)	Control	Model	GMK(H)	GMK(M)	GMK(L)	DEX
	8.01	65.74	15.87	28.49	64.67	16.5
	13	65.74	19.92	33.84	36.83	24.31
	14.1	70.19	25.19	35.61	48.11	25.19
	14.67	72.52	27.51	49.73	53.12	41.43
	15.26	63.62	35.01	50.56	63.62	37.46
