# Supplementary material for: Guominkang formula alleviate inflammation in eosinophilic asthma by regulating immune balance of Th1/2 and Treg/Th17 cells
Source: Front Pharmacol. 2022 Oct 14;13:978421. doi: 10.3389/fphar.2022.978421 (PMC9624229; doi:10.3389/fphar.2022.978421)
Supplement: Supplementary file 2 [file Table9.XLSX]

## Sheet: Sheet1
Index	Model-1	Model-2	Model-3	Model-4	Model-5	GMK-1	GMK-2	GMK-3	GMK-4	GMK-5
Th17(%)	4.6	3.9	3.2	5.1	3.5	1.5	1.6	1.7	0.8	0
Treg(%)	9.8	10.9	10.9	7.5	6.4	13.6	14.2	15.1	13	13.5
Th1(%)	1.1	0.8	0.5	0.8	0.8	1.2	1.6	1.3	1.8	1.4
Th2(%)	1.7	1.7	2.6	9.8	0.3	0.2	0.2	0.2	0.4	0.3
Methacholine(12.5mg/ml)	4.33	2.725	3.9025	2.4325	3.738	1.26	1.92	1.725	1.60333	1.505
Methacholine(25mg/ml)	4.60667	3.405	5.18	3.805	4.3275	2.64111	2.522	2.07667	2.005	1.99667
Methacholine(50mg/ml)	7.138	6.5	6.035	5.1	5.778	2.68	2.646	2.632	2.58667	2.5175
OVA-IgE	4458.07	4327.02	4695.53	4312.46	3905.87	971.751	1379.46	1632.6	2163.51	1250.09
Eos number	850000	950000	960000	1050000	1120000	50000	70000	210000	120000	150000
Different gut microbiota	model-1	model-2	model-3	model-4	model-5	GMK-1	GMK-2	GMK-3	GMK-4	GMK-5
GCA_900066575	0.000194666	0.00369866	0.000454221	0.000713776	0.00051911	0.000324444	0.000454221	0.000389332	6.48887e-05	0.000194666
Desulfovibrio	0	0	0	0	0	0	0.0170657	0.00201155	0.00525599	0.000454221
Muribaculum	0.146	0.0272533	0.0263448	0.0393875	0.0590487	0.00110311	0.0171306	0.0123937	0.0127831	0.00382843
Klebsiella	0.000259555	6.48887e-05	0.000129777	0.000194666	0.000454221	0.000583998	0.000583998	0.000454221	0.000259555	0.00207644
RikenellaceaeRC9gutgroup	0.000973331	0	0.0137564	0.00713776	0.00421777	0.00350399	0.049575	0.0714425	0.0295244	0.0937642
Differential metabolites	model1	model2	model3	model4	model5	GMK1	GMK2	GMK3	GMK4	GMK5
Pseudouridine	231659	270969	245853	264725	201740	155196	189895	226532	242692	191726
Prostaglandin e2	297092	254865	313444	55177.4	29413.7	18669.2	9152.12	20880.1	10221.8	20157.5
Prostaglandin b1	62277.6	38361.4	32960.4	20847.9	32708.2	19335.9	25762.8	11403.4	12508.5	17157.1
Pantothenate	223797	267279	250974	280721	235357	223246	263578	142420	244089	171667
Palmitic acid	1.11051e+07	1.89088e+07	1.22038e+07	1.72022e+07	1.90443e+07	1.38753e+07	1.23527e+07	1.00229e+07	1.31558e+07	1.29751e+07
L-pyroglutamic acid	1.05817e+06	941702	904218	1.00275e+06	930824	748731	780551	674374	869313	819522
Glutamine	462075	529218	376514	523050	541372	346896	386492	327099	454708	433568
D-Quinovose	40332.7	36579.1	52077.4	32154.6	50530.5	57224.1	54624.5	44044.4	40345.4	45876.1
DL-glutamine	354788	341478	335449	385707	339862	269615	286450	247165	303390	298253
Dihydro-4,4-dimethyl-2,3-furandione	82412.5	93422	65947.9	91669.8	97921.5	64214.2	70068.6	58395.7	80259.9	79821
Cytosine	76414	85411.3	76926	87611.3	78007	63590.6	81360.4	65733.9	82784.2	75435.1
3,4-dihydroxyhydrocinnamic acid	94404.5	63179.6	95267.1	102508	109783	48967.5	59567.1	55966.4	60467.8	52017.8
1,5-anhydro-d-sorbitol	66676.9	64381.3	94156.5	60872.6	93658.6	108047	101308	102068	72788	99886.8
