# Supplementary material for: Guominkang formula alleviate inflammation in eosinophilic asthma by regulating immune balance of Th1/2 and Treg/Th17 cells
Source: Front Pharmacol. 2022 Oct 14;13:978421. doi: 10.3389/fphar.2022.978421 (PMC9624229; doi:10.3389/fphar.2022.978421)
Supplement: Supplementary file 3 [file Table6.XLSX]

## Sheet: pos
ID	m/z	rt(s)	Name	adduct	HMDB	KEGG	SuperClass	Class	SubClass	model1	model2	model3	model4	model5	model6	model7	GMK1	GMK2	GMK3	GMK4	GMK5	GMK6	QC-1	QC-2	QC-3	QC-4
M472T377	472.169	376.91	10-formyl-7,8-dihydrofolic acid	[M+H]+	HMDB0006485	C03204	Organoheterocyclic compounds	Pteridines and derivatives	Pterins and derivatives	3395.35	1387.87	3996.41	4361.45	1459.62	3494.36	2871.67	3390.82	5305.15	3158.39	3575.42	4743.35	1234.92	3788.94	3656.15	3925.52	3582.06
M480T185	480.342	184.988	1-(1z-hexadecenyl)-sn-glycero-3-phosphocholine	[M+H]+	HMDB0010407		Lipids and lipid-like molecules	Glycerophospholipids	Glycerophosphocholines	59361.9	75929	62954.8	70401.2	67182	79814.7	71425.4	61925.1	83641.5	58149.3	73367.4	71560.8	57727.2	65804.2	61937	65808.7	65802.4
M72T284	72.0799	284.087	1,2-diamino-2-methylpropane	[M+H-NH3]+			Organic nitrogen compounds	Organonitrogen compounds	Amines	42576.6	17239	20666.6	18331.5	24420.8	13698.4	26041	25865.1	21760.3	9323.07	25039.5	36184.2	30667.2	22142.3	21940.1	21942	22137.1
M600T32	599.5	32.2135	1,2-dilinoleoylglycerol	[M+H-H2O]+			Lipids and lipid-like molecules	Fatty Acyls	Lineolic acids and derivatives	44186.7	35060.3	40811.2	31020.2	35024.5	23737.8	38815	34709	20450.9	27493.7	43603.4	28918.6	55329.6	27687.4	27159.2	27680.8	25714.8
M787T144_1	786.599	143.96	1,2-dioleoyl-sn-glycero-3-phosphatidylcholine	[M+H]+	HMDB0062690		Lipids and lipid-like molecules	Glycerophospholipids	Glycerophosphocholines	8.46147e+06	1.50367e+07	6.77397e+06	10704031	6.93772e+06	7.02898e+06	8.88966e+06	7.15585e+06	8.90204e+06	1.30117e+07	8.84676e+06	15623262	1.54736e+07	12150421	1.13985e+07	1.08633e+07	1.21609e+07
M604T76	603.531	75.9455	1,2-dioleoyl-sn-glycerol	[M+H-H2O]+	HMDB0007218		Lipids and lipid-like molecules	Glycerolipids	Diradylglycerols	15190.4	21195.1	18019.2	16386	9871.1	9209.13	22518.5	15586.8	10176.1	12778.6	27209.5	14047	31716.6	15200.2	14079.1	13734.9	13694.7
M731T148	730.534	147.617	1,2-dipalmitoleoyl-sn-glycero-3-phosphocholine	[M+H]+	HMDB0008002		Lipids and lipid-like molecules	Glycerophospholipids	Glycerophosphocholines	74676.3	53704.3	36508	56904.4	45873.8	56958.7	66288.7	43439.4	53170.3	58177.8	72333.7	59661.6	71591.1	62070.7	63224.1	63221.3	58245.6
M707T150	706.534	149.997	1,2-dipentadecanoyl-sn-glycero-3-phosphocholine	[M+H]+	HMDB0007934		Lipids and lipid-like molecules	Glycerophospholipids	Glycerophosphocholines	42511.4	43478.1	39018.7	39955.4	41359.3	36475.3	40327.6	44574.8	47994.7	40185.1	54146.1	41258.7	48907.5	48359	45616.4	43950.5	44879.7
M319T52	319.225	51.586	12-oxo-5z,8z,10e,14z-eicosatetraenoic acid	[M+H]+	HMDB0013633	C14807	Lipids and lipid-like molecules	Fatty Acyls	Fatty acids and conjugates	17708.5	4966.16	9240.05	9057.55	2080.73	497.698	1725.17	9287.11	9017.21	1902.89	1848.03	7187.22	11804.1	8080.01	8044.36	8012.07	7897.34
M303T55	303.23	55.233	12s-hydroxy-5z,8z,10e,14z-eicosatetraenoic acid	[M+H-H2O]+		C14777	Lipids and lipid-like molecules	Fatty Acyls	Eicosanoids	35220.9	31559.8	21709.8	30308.7	15455.1	4996.31	15880.4	49494.8	30439.4	8005.83	12120.4	23081.9	29863.4	39475.4	39462.4	41874.7	40119
M390T294	390.1	294.286	1,3-benzenediol, 4-chloro-6-[5-[[2-(4-morpholinyl)ethyl]amino]-1,2-benzisoxazol-3-yl]-	[M+H]+						1131.9	1623.76	751.912	1589.64	3244.6	2275.15	1239	1945.3	1708.68	2587.42	1627.2	1350.72	2936.76	1408.86	971.122	1757.21	1335.27
M205T215	205.059	215.303	1,4-dihydroxy-2-naphthoic acid	[M+H]+		C03657	Benzenoids	Naphthalenes	Naphthalenecarboxylic acids and derivatives	92.4451	3835.68	195.037	250.519	218.826	3304.9	230.721	126.269	171.559	3207.17	131.462	3720.33	3642.78	529.577	557.536	1388.31	554.05
M624T427	624.301	426.521	15-deoxy-.delta.12,14-prostaglandin j2 glutathione	[M+H]+			Lipids and lipid-like molecules	Fatty Acyls	Eicosanoids	1717.1	333.27	1161.04	778.595	1056.3	1394.18	1200.38	3456.1	3076.49	839.03	3921.04	1006.06	1754.6	1780.03	1882.44	1808.46	1985.95
M284T126	284.329	125.834	15-deoxy-goyazensolide	[M+K]+			Organoheterocyclic compounds	Lactones	Gamma butyrolactones	30060.5	643.236	1699.03	506.888	5444.82	3530.95	5391.22	6213.23	7044.45	3879.87	696100	419.516	17285.7	20662.9	20367.8	21325.8	20524.2
M86T273	86.0954	272.707	1,5-pentanediamine	[M+H-NH3]+	HMDB0002322	C01672	Organic nitrogen compounds	Organonitrogen compounds	Amines	85003.7	137826	137836	98077.2	140325	87256.8	193954	84122.4	72015.4	78565.5	194564	160975	106680	161729	124584	161667	161400
M84T380	84.0435	379.703	1-Aminocyclopropanecarboxylic acid	(M+H-H2O)+	HMDB0036458	C01234	Organic acids and derivatives	Carboxylic acids and derivatives	"Amino acids, peptides, and analogues"	272467	243828	75928.2	123366	242459	89535	224737	89923.7	206959	183361	230149	213549	193990	141314	159247	158893	141876
M580T185	580.43	184.992	1-behenoyl-2-hydroxy-sn-glycero-3-phosphocholine	[M+H]+	HMDB0010398		Lipids and lipid-like molecules	Glycerophospholipids	Glycerophosphocholines	60455.7	67157.6	60994.1	60596.3	55065	73283.7	66579.4	52225.9	79268.2	80998.8	74976.9	57751	51879.6	73735.9	71967	71962.3	72803.5
M85T204	85.0094	204.256	1h-1,2,4-triazol-3-amine	[M+H]+		C11261	Organoheterocyclic compounds	Azoles	Triazoles	1313.33	1622.64	1455.45	1724.33	1210.29	1537.96	1523.73	2112.28	1184.21	807.898	1350.29	1352.72	1263.55	1758.58	1386.37	1840.48	1838.99
M510T192	510.352	191.714	1-heptadecanoyl-sn-glycero-3-phosphocholine	[M+H]+	HMDB0012108		Lipids and lipid-like molecules	Glycerophospholipids	Glycerophosphocholines	330517	329814	395694	367252	331001	345044	345642	418278	425738	360032	364522	374896	287997	371103	371069	379285	373612
M759T146_1	758.569	145.794	1-hexadecanoyl-2-octadecadienoyl-sn-glycero-3-phosphocholine	[M+H]+			Lipids and lipid-like molecules	Glycerophospholipids	Glycerophosphocholines	2.23692e+07	2.09139e+07	2.06183e+07	2.54073e+07	2.24451e+07	1.94141e+07	2.11699e+07	1.96013e+07	2.08444e+07	1.81011e+07	2.27782e+07	2.12565e+07	2.05027e+07	2.21786e+07	2.45526e+07	2.21878e+07	2.21705e+07
M747T146_2	746.599	146.4	1-hexadecyl-2-(9z-octadecenoyl)-sn-glycero-3-phosphocholine	[M+H]+			Lipids and lipid-like molecules	Glycerophospholipids	Glycerophosphocholines	148474	173382	146963	178890	282118	152350	174665	206060	204289	132332	179028	142134	172482	170026	169989	167913	163068
M482T198_2	482.354	198.339	1-hexadecyl-sn-glycero-3-phosphocholine	[M+H]+			Lipids and lipid-like molecules	Glycerophospholipids	Glycerophosphocholines	398370	629134	432112	570414	404890	430513	594816	400377	661654	361086	586009	470574	364906	546784	542962	546797	393871
M127T409	127.049	408.829	1-imidazoleacetic acid	[M+H]+	HMDB0029736		Organic acids and derivatives	Carboxylic acids and derivatives	Amino acids, peptides, and analogues	12986.1	7093.22	13734.8	12377.5	11967.2	6741.8	7764.48	12287.3	13081	5716.54	5667.35	12537.2	10880.4	6138.12	6840.43	6765.13	6482.81
M608T183	608.461	183.146	1-lignoceroyl-2-hydroxy-sn-glycero-3-phosphocholine	[M+H]+	HMDB0010405		Lipids and lipid-like molecules	Glycerophospholipids	Glycerophosphocholines	83996	93689.1	79670.9	82380.8	71503.8	127317	85165.1	79840.7	107554	123807	117116	85318.5	87258.5	100198	90958	100327	98129.2
M126T329	126.101	329.009	1-Methylhistamine	(M+H)+	HMDB0000898	C05127	Organic nitrogen compounds	Organonitrogen compounds	Amines	4956.03	6021.39	4505.72	4714.23	3802.96	3362.52	4678.88	4532.58	5863.37	2726.52	6433.72	4476.11	2088.06	4745.67	4676.91	4580.67	4419.63
M170T394	170.091	394.092	1-methyl-l-histidine	[M+H]+	HMDB0000001	C01152	Organic acids and derivatives	Carboxylic acids and derivatives	Amino acids, peptides, and analogues	343397	171478	288355	217886	224463	127703	327572	197218	251832	153496	467745	185107	184048	171994	183274	174584	182596
M137T294	137.07	294.424	1-Methylnicotinamide	M+	HMDB0000699	C02918	Organoheterocyclic compounds	Pyridines and derivatives	Pyridinecarboxylic acids and derivatives	6233.85	10817.2	8632.01	6031.24	12037.1	3575.81	10104.7	8084.89	4559.12	5549.77	9036.87	6756.45	8747.99	6844.8	7000.16	6952.77	7025.24
M355T35	355.283	34.8455	1-monolinoleoyl-rac-glycerol	[M+H]+			Lipids and lipid-like molecules	Fatty Acyls	Lineolic acids and derivatives	12824.4	18210.6	11985.9	11957.3	17049	11156.1	14718.6	7591.24	6921.73	13566.5	26249.6	15657.2	21053.1	23520.8	22635.6	23012.9	22803.6
M468T198	468.307	198.412	1-myristoyl-sn-glycero-3-phosphocholine	[M+H]+	HMDB0010379		Lipids and lipid-like molecules	Glycerophospholipids	Glycerophosphocholines	179417	244563	110627	178283	129212	193835	206046	129488	176509	163949	228673	180216	142013	193551	187623	202238	190754
M550T188_2	550.382	188.037	1-O-(cis-9-Octadecenyl)-2-O-acetyl-sn-glycero-3-phosphocholine	M+						116711	145192	127666	143822	113266	147489	155368	157605	129880	152814	134745	136964	107928	144144	144143	145454	147544
M811T140_1	810.599	139.638	1-octadecanoyl-2-octadecenoyl-sn-glycero-3-phosphocholine	[M+Na]+			Lipids and lipid-like molecules	Glycerophospholipids	Glycerophosphocholines	8.28152e+06	8.99606e+06	9.1476e+06	9.15407e+06	8.67654e+06	7.68232e+06	9.2e+06	8.44471e+06	9.40849e+06	9.2572e+06	9.70328e+06	8.74077e+06	1.03706e+07	9.09908e+06	8.87327e+06	8.87325e+06	8.873e+06
M733T148	732.55	147.616	1-oleoyl-2-myristoyl-sn-glycero-3-phosphocholine	[M+H]+	HMDB0008097		Lipids and lipid-like molecules	Glycerophospholipids	Glycerophosphocholines	276409	238331	212426	250730	224703	243132	275645	242058	281632	279173	344430	228659	372232	269885	267090	274611	256223
M544T189_2	544.338	189.256	1-oleoyl-sn-glycero-3-phosphocholine	[M+Na]+	HMDB0002815		Lipids and lipid-like molecules	Glycerophospholipids	Glycerophosphocholines	3.94306e+06	5.30493e+06	5.25392e+06	4.51469e+06	5.59968e+06	5.48123e+06	4.78496e+06	4.33374e+06	5.28371e+06	5.33517e+06	4.50195e+06	4.34976e+06	4.34748e+06	4.69339e+06	4.57715e+06	4.6687e+06	4.72003e+06
M807T39	806.568	38.628	1-palmitoyl-2-docosahexaenoyl-sn-glycero-3-phosphocholine	[M+H]+	HMDB0007991		Lipids and lipid-like molecules	Glycerophospholipids	Glycerophosphocholines	3.08219e+06	4.42169e+06	3.67838e+06	3.94985e+06	4.48389e+06	8.03391e+06	4.56759e+06	3.44058e+06	4.02903e+06	4.72382e+06	3.92579e+06	3.3476e+06	3.38475e+06	4.39418e+06	4.16487e+06	4.36354e+06	4.39392e+06
M578T80	577.514	79.66	1-palmitoyl-2-oleoyl-sn-glycerol	[M+H-H2O]+	HMDB0007102		Lipids and lipid-like molecules	Glycerolipids	Diradylglycerols	12764.2	14330.4	11726.7	12201	10205	10785.8	9860.93	7741.74	9913.84	9107.76	10678.6	7315.55	13871.7	9938.92	9495.75	8769.49	8680.64
M313T33	313.272	33.4415	1-Palmitoylglycerol	(M+H-H2O)+						10061.7	9706.9	7269.3	8867.54	7143.41	8516.22	11473.9	6689.2	8537.16	7352.98	17200.8	9256.55	13376.1	68574.6	70184.8	66872.6	67784.5
M538T189	538.383	188.645	1-Palmitoyllysophosphatidylcholine	(M+CH3CN+H)+						232504	213904	248828	239783	194556	235213	261384	309313	301698	291515	265177	295766	179183	276148	268972	274642	276165
M496T194_5	496.34	194.14	1-palmitoyl-sn-glycero-3-phosphocholine	[M+H]+	HMDB0010382		Lipids and lipid-like molecules	Glycerophospholipids	Glycerophosphocholines	2.65717e+07	3.31445e+07	3.31345e+07	3.51805e+07	2.99026e+07	3.12864e+07	3.66219e+07	2.76526e+07	3.54129e+07	2.63607e+07	2.98878e+07	2.78532e+07	2.50375e+07	3.2412e+07	3.23953e+07	3.31327e+07	3.31268e+07
M482T195	482.322	195.354	1-pentadecanoyl-sn-glycero-3-phosphocholine	[M+H]+	HMDB0010381		Lipids and lipid-like molecules	Glycerophospholipids	Glycerophosphocholines	133458	201483	133315	89921.7	110671	101966	147131	78802.3	98331.6	182358	178564	104037	96166.7	138943	134490	134781	161624
M266T130	266.185	130.419	1-pentanone, 1-(3,4-dimethoxyphenyl)-2-(ethylamino)-	[M+H]+			Organic oxygen compounds	Organooxygen compounds	Carbonyl compounds	4597.1	6767.72	5861.14	6634.35	6403.33	4316.93	8308.02	5683.56	5298.01	2522.46	3200.5	3923.13	6516.57	8105.36	8561.81	8560.37	8562.2
M888T195	887.559	195.352	1-stearoyl-2-arachidonoyl-sn-glycero-3-phospho-(1'-myo-inositol)	[M+H]+	HMDB0009815		Lipids and lipid-like molecules	Glycerophospholipids	Glycerophosphoinositols	125068	157635	160791	159049	141019	172308	154984	114532	168569	134851	170654	116058	124084	171822	158595	164432	158383
M835T138_1	834.6	138.47	1-stearoyl-2-docosahexaenoyl-sn-glycero-3-phosphocholine	[M+H]+	HMDB0008057		Lipids and lipid-like molecules	Glycerophospholipids	Glycerophosphocholines	4.67066e+06	4.44706e+06	4.48083e+06	4.69875e+06	4.19517e+06	4.08802e+06	4.51127e+06	4.57477e+06	4.96041e+06	4.20288e+06	5.10693e+06	4.64047e+06	5.33382e+06	5.14408e+06	5.0536e+06	5.11012e+06	5.08703e+06
M524T190_3	524.37	190.445	1-stearoyl-2-hydroxy-sn-glycero-3-phosphocholine	[M+H]+	HMDB0010384	C04230	Lipids and lipid-like molecules	Glycerophospholipids	Glycerophosphocholines	1.81766e+07	1.89364e+07	1.68808e+07	2.06594e+07	1.46697e+07	1.9157e+07	1.95355e+07	1.72213e+07	1.92891e+07	2.08689e+07	1.90248e+07	1.99956e+07	1.70194e+07	1.98516e+07	1.95908e+07	1.95924e+07	2.06557e+07
M482T172	482.321	172.199	1-stearoyl-2-hydroxy-sn-glycero-3-phosphoethanolamine	[M+H]+	HMDB0011130		Lipids and lipid-like molecules	Glycerophospholipids	Glycerophosphoethanolamines	5843.16	7311.58	18316.6	7279.86	5992.25	8592.29	7485.34	5413.96	6015.09	8986.91	8141.55	6611.9	5414.07	7219.04	7212.45	7318.64	7217.08
M833T39_1	832.581	38.614	1-Stearoyl-2-oleoyl-sn-glycerol 3-phosphocholine (SOPC)	(M-H+2Na)+	HMDB0000564/HMDB0007878/HMDB0007879/HMDB0007880/HMDB0007882/HMDB0007884/HMDB0007886/HMDB0007887/HMDB0007897/HMDB0007898/HMDB0007911/HMDB0007912/HMDB0007913/HMDB0007914/HMDB0007936/HMDB0007937/HMDB0007938/HMDB0007939/HMDB0007940/HMDB0007958/HMDB0007959/HMDB0007960/HMDB0007961/HMDB0007964/HMDB0007966/HMDB0007967/HMDB0007981/HMDB0007982/HMDB0007983/HMDB0007984/HMDB0007985/HMDB0008002/HMDB0008003/HMD…	C00157	Lipids and lipid-like molecules	Glycerophospholipids	Glycerophosphocholines	278429	361573	333297	348424	400213	823048	366391	321089	359957	505115	328814	321413	329425	355840	355847	359407	363826
M568T162	568.336	162.494	1-Stearoyl-sn-glycerol 3-phosphocholine	(M-H+2Na)+						181312	222649	141037	148105	206484	323330	198032	171253	169147	236083	165739	191042	57115.4	216572	216641	218324	249818
M524T165	524.368	164.51	1-Stearoyl-sn-glycerol 3-phosphocholine(LPC(18:0))	[M+H]+	HMDB0010384	C04230	Lipids and lipid-like molecules	Glycerophospholipids	Glycerophosphocholines	32893.7	345836	47697.7	308104	859856	188956	534766	992863	173907	59555.9	145519	164406	17877.7	195446	219395	246182	467714
M119T35_1	119.048	34.6535	2-(2-hydroxyethoxy)phenol	[M+H-2H2O]+						77836	65113.7	54042.6	65316	50801.6	39321.6	58563.1	46106.2	59713.2	59562.8	59738.2	64396.5	70731.3	61655.9	59716.1	61364.7	61653.6
M515T448	515.035	447.833	2,4-thiazolidinedione, 5-(6-quinoxalinylmethylene)-	[2M+H]+			Organoheterocyclic compounds	Diazanaphthalenes	Benzodiazines	16057.1	15646.4	11278.4	11052.7	15587.3	13124.5	11847.1	11934.2	11074.2	13851.5	15794.1	12322.9	10624.7	12229.4	12440.1	13976.8	12228.2
M594T171	594.372	171.399	2-(5-oxovaleryl)phosphatidylcholine	[M+H]+			Lipids and lipid-like molecules	Glycerophospholipids	Glycerophosphocholines	1052.48	13991.2	1503.5	2873.65	802.457	4374.13	3062.84	1881.93	3152.89	2322.68	3697.96	2618.07	1842.59	10093.3	12077.7	12434.8	12438
M120T261	120.08	260.745	2-amino-1-phenylethanol	[M+H-H2O]+	HMDB0001065	C02735	Organic nitrogen compounds	Organonitrogen compounds	Amines	270025	389091	260603	311232	396548	353336	374175	271786	291698	245956	368628	281001	249798	353557	366292	373470	373269
M137T49	137.07	49.1095	2-aminobenzamide	[M+H]+	HMDB0033947		Benzenoids	Benzene and substituted derivatives	Benzoic acids and derivatives	6094.05	3697.96	7431.92	5545.6	8850.96	201.091	6199.38	11835.4	3810.18	2261.21	2531.47	4296.16	11879.4	7656.22	7057.96	7841.89	7835.06
M455T206	455.186	206.232	2'-deoxycytidine	[2M+H]+	HMDB0000014	C00881	Nucleosides, nucleotides, and analogues	Pyrimidine nucleosides	Pyrimidine 2'-deoxyribonucleosides	41888.8	43640.4	35489.2	40373.9	39218.2	50061.9	65368.7	30153.9	43329.2	33505.8	47088	38949.6	36734	47786.8	47926.8	48591.6	48593.3
M308T162	308.083	161.976	2'-deoxycytidine 5'-monophosphate	[M+H]+	HMDB0001202	C00239	Nucleosides, nucleotides, and analogues	Pyrimidine nucleotides	Pyrimidine deoxyribonucleotides	8127.53	8767.78	6850.09	9233.58	4422.18	22792.7	7818.21	4761.62	6301.08	19881.8	6908.22	6737.35	6198.14	7270.26	7277.58	6314.88	7199.19
M187T377_1	187.071	377.31	2-deoxy-d-glucose	[M+Na]+	HMDB0062477	C00586	Lipids and lipid-like molecules	Fatty Acyls	Fatty alcohols	1.2681e+06	1.30663e+06	1.20742e+06	1.09207e+06	1.28306e+06	1.39909e+06	1.419e+06	1.14053e+06	1.43956e+06	1.39563e+06	1.29784e+06	1.47553e+06	1.28443e+06	1.42792e+06	1.46517e+06	1.44945e+06	1.47527e+06
M316T374	316.174	373.537	[2-[(e)-3,4-dihydroxypent-1-enyl]-6-oxooxan-3-yl] (e)-2-methylbut-2-enoate	[M+NH4]+			Organoheterocyclic compounds	Lactones	Delta valerolactones	22925.7	20408.1	12869.9	23893.3	14721.2	20626.7	15848	16639	11591.2	18836.8	19028.4	16676.4	23716.8	18598	16772.9	19002.6	19001.7
M628T195	627.532	195.354	2-epahpa [dmed-fahfa]	[M+H]+						701640	1.13614e+06	903699	1.19071e+06	820097	1.0174e+06	1.02009e+06	651479	1.07133e+06	747342	952711	724422	766283	1.08173e+06	1.08528e+06	1.05401e+06	958966
M159T280	159.064	279.598	2-heptyl-4-hydroxyquinoline n-oxide	[M+H-C6H13O]+		C04284	Organoheterocyclic compounds	Quinolines and derivatives	4-hydroxy-2-alkylquinolines	6379.13	5000.12	5736.28	4784.62	2736.14	4012.62	2947.41	5888.14	4153.68	3980.31	4002.58	3990.57	2853.85	5822.94	5787.55	5671.79	5823.04
M246T240	246.169	239.706	2-methylbutyryl-l-carnitine	[M+H]+			Lipids and lipid-like molecules	Fatty Acyls	Fatty acid esters	79055.9	71441.3	62650	83170.7	64150.1	73433.3	81993.7	61145.4	68864.4	49710.3	64258.1	64218.8	45530.6	83092.6	84197.7	85114.8	85100.4
M783T142_1	782.569	141.534	2-oleoyl-1-palmitoyl-sn-glycero-3-phosphocholine	[M+Na]+	HMDB0007972		Lipids and lipid-like molecules	Glycerophospholipids	Glycerophosphocholines	9.55552e+06	1.07541e+07	1.10137e+07	1.02249e+07	1.14005e+07	1.00496e+07	1.05528e+07	9.81642e+06	1.06975e+07	9.29421e+06	1.08672e+07	8.91353e+06	1.02421e+07	1.02488e+07	1.02181e+07	1.05023e+07	1.03125e+07
M257T209	257.098	209.37	2'-O-methylcytidine	M+						1777.93	960.193	1875.9	1909.31	1325.67	976.902	1097.9	6009.51	1031.04	1448.4	6012.83	1484.81	2610.96	2213.1	2385.14	2378.67	2385.23
M106T28	106.064	27.8425	2-pyridylethanol	[M+H-H2O]+						3997.39	5922.27	4653.86	5228.61	4067.07	4133.55	9042.28	2448.13	5670.29	2939.25	5036.21	4551.46	5207.47	5793.82	5591.93	6144.66	5348.77
M703T379	703.384	378.525	(2r,3r,4r,6ar,6bs,8as,11r,12r,12as,14br)-2,3,12-trihydroxy-4,6a,6b,11,12,14b-hexamethyl-8a-[(2s,3r,4s,5s,6r)-3,4,5-trihydroxy-6-(hydroxymethyl)oxan-2-yl]oxycarbonyl-1,2,3,4a,5,6,7,8,9,10,11,12a,14,14a-tetradecahydropicene-4-carboxylic acid	[M+Na]+			Lipids and lipid-like molecules	Prenol lipids	Terpene glycosides	3345.11	4716.23	7431.27	1488.27	975.787	1261.28	4372.43	882.689	3424.75	5743.54	2632.34	2580.94	865.113	4370.14	4373.91	4223.33	4279.25
M930T320	930.488	320.129	[(2s,3r,4s,5r,6r)-6-[[(2r,3s,4s,5r,6r)-3,4-dihydroxy-6-[(2e,6e,10e)-3,7,11,15-tetramethylhexadeca-2,6,10,14-tetraenoxy]-5-[(2s,3r,4r,5s,6s)-3,4,5-triacetyloxy-6-methyloxan-2-yl]oxyoxan-2-yl]methoxy]-4,5-dihydroxy-2-methyloxan-3-yl] acetate	[M+NH4]+			Lipids and lipid-like molecules	Prenol lipids	Terpene glycosides	2568.27	883.03	2119.21	3405.49	1687.68	1417.69	2931.07	6155.1	1766.35	808.169	3469.57	911.986	2279.63	2133.26	2065.34	2088.8	2065.77
M1098T203	1097.53	202.939	[(2s,3r,4s,5s,6r)-3,4,5-trihydroxy-6-[[(2r,3r,4s,5s,6r)-3,4,5-trihydroxy-6-(hydroxymethyl)oxan-2-yl]oxymethyl]oxan-2-yl] (4as,6as,6br,9r,10s,12ar,14bs)-10-[(2s,3r,4s,5s)-4,5-dihydroxy-3-[(2s,3r,4r,5r,6s)-3,4,5-trihydroxy-6-methyloxan-2-yl]oxyoxan-2-yl]oxy-9-(hydroxymethyl)-2,2,6a,6b,9,12a-hexamethyl-1,3,4,5,6,6a,7,8,8a,10,11,12,13,14b-tetradecahydropicene-4a-carboxylate	[M+Na]+			Lipids and lipid-like molecules	Prenol lipids	Terpene glycosides	142.48	7754.64	3841.48	1403.49	5562.16	6474.04	1560.72	760.649	279.554	1840.21	1096.23	1013.76	3582.35	1295.9	1322.24	1292.68	1414.47
M433T50	433.328	49.7805	(2s,6r)-2-methyl-6-((3r,5s,7r,9s,10s,12s,13r,14s,17r)-3,7,12-trihydroxy-10,13-dimethylhexadecahydro-1h-cyclopenta[a]phenanthren-17-yl)heptanoic acid	[M-H2O+H]+			Lipids and lipid-like molecules	Steroids and steroid derivatives	Bile acids, alcohols and derivatives	5400.08	5233.51	7767.62	4695.1	4333.75	1987.4	4160.61	8049.74	4323.35	2516.38	3731.53	3474.63	4950.17	4963.21	4758.51	4908.83	4290.41
M147T34	147.079	33.6	2-tert-butyl-p-quinone	[M+H-H2O]+			Organic oxygen compounds	Organooxygen compounds	Carbonyl compounds	166040	143562	132278	161738	144940	115694	152715	135855	124011	117943	129560	153886	144676	128738	128908	3485.85	128446
M144T256	144.079	256.123	3-(2-Hydroxyethyl)indole	(M+H-H2O)+						5786.41	8386.38	5600.36	7505.44	3155.78	6793.51	8288.65	4827.54	9484.54	4329.75	8184.47	7762.98	2615.4	7722.96	7716.49	7765.41	8090.69
M231T399	231.061	399.499	3,4-dimethoxycinnamic acid	M-H	HMDB0034315		Phenylpropanoids and polyketides	Cinnamic acids and derivatives	Hydroxycinnamic acids and derivatives	4250.23	3732.56	3342.02	3917.97	3606.41	4831.79	2710.78	4858.13	3235.39	3151.73	3118.43	5517.63	6012.01	3863.47	5563.03	4706.17	4556.06
M86T289	86.0587	289.346	3-Aminobutanoic acid	(M+H-H2O)+	HMDB0031654		Organic acids and derivatives	Carboxylic acids and derivatives	"Amino acids, peptides, and analogues"	958.301	681.408	683.254	978.431	852.598	19083.7	1023.9	900.523	21925.4	783.033	735.168	24462.4	422.796	613.392	758.277	726.077	759.986
M136T90	136.038	90.101	3-hydroxyanthranilic acid	[M+H-H2O]+	HMDB0001476	C00632	Benzenoids	Benzene and substituted derivatives	Benzoic acids and derivatives	43991	80017.7	64074.2	58073.9	82547.7	38813.7	86711	73765.2	56907.6	42115.9	58907	61041.5	80225.1	64925.1	64936.6	64929.7	67700.3
M248T321	248.149	320.965	3-hydroxybutyrylcarnitine	[M+H]+	HMDB0062735		Lipids and lipid-like molecules	Fatty Acyls	Fatty acid esters	384203	368995	205964	374646	203202	270532	305914	247167	244937	248055	367529	330320	318265	312415	309575	314508	305262
M121T37	121.064	36.608	3-methoxybenzyl alcohol	[M+H-H2O]+		C03352	Benzenoids	Benzene and substituted derivatives	Benzyl alcohols	28805.1	17770.4	21667.3	25409.2	19298.6	13397.1	16550.4	21443.4	25827.8	23658.8	25950.6	27110.7	1570.63	24772.7	25961	25289	26674.5
M132T256	132.079	256.107	3-methylindole	[M+H]+	HMDB0000466	C08313	Organoheterocyclic compounds	Indoles and derivatives	Indoles	2604.54	3866.98	2491.62	5131.68	2001.27	4697.04	5224.93	2050.71	8032.51	3599.07	4165.6	5166.07	2743.64	4961.88	4107.59	4953.18	4946.55
M458T258	458.344	257.679	3-oxazolidinecarboxylic acid, 2,2-dimethyl-4-(1-oxo-2-hexadecyn-1-yl)-, 1,1-dimethylethyl ester, (4s)-	[M+Na]+			Organoheterocyclic compounds	Azolidines	Oxazolidines	1586.68	2403.25	1199.56	1570.36	2711.09	2174.82	2857.03	2415.01	1971.97	1374.61	1614.47	1191.5	1315.39	1985.28	1985.46	2086.2	2023.38
M159T256	159.09	256.284	4-(1-piperazinyl)-1h-indole	[M+H-C2H5N]+			Organoheterocyclic compounds	Diazinanes	Piperazines	15132.1	21615.4	12089.9	17457.9	10610.9	20682.5	25951	12368.2	26258.3	20987.6	22339.7	23266.5	8552.66	20788.1	23206.4	23670.1	23672.3
M442T193	442.349	192.912	4,4'-methylenebis(2,6-di-tert-butylphenol)	[M+NH4]+		C14287	Benzenoids	Benzene and substituted derivatives	Diphenylmethanes	12402.3	14323.5	4694.57	17746.9	9627.17	9791.16	14468.3	10745.6	10585.7	8989.53	8614.63	7073.63	11147.1	10488.5	10495.8	10575.1	11504.5
M478T199	478.291	199.035	4-[5-[[4-[5-[acetyl(hydroxy)amino]pentylamino]-4-oxobutanoyl]-hydroxyamino]pentylamino]-4-oxobutanoic acid	[M+NH4]+			Lipids and lipid-like molecules	Fatty Acyls	Fatty amides	220074	244202	146312	204511	198229	206603	259427	131530	127638	232483	308836	245789	178739	204153	205727	209192	209236
M133T28	133.051	28.37	4h-1-benzopyran-4-one, 2-(2-amino-3-methoxyphenyl)-	[M+H-C8H7O2]+			Phenylpropanoids and polyketides	Flavonoids	O-methylated flavonoids	8110	12606	8914.54	11259.6	9567.77	3189.85	12397.6	7140.81	11182.5	3229.26	12206.1	10690.5	10378.9	10388.8	10326.8	10389.3	9883.61
M146T51	146.059	50.619	4-hydroxyquinoline	[M+H]+		C06343	Organoheterocyclic compounds	Quinolines and derivatives	Quinolones and derivatives	11430.3	7597.16	7388.39	12567.4	9656.39	514.28	7935.2	14983.8	9870.27	4504.98	11459.4	9402.51	10607.9	7042.17	8065.58	7024.61	7017.53
M127T375	127.049	374.509	4-imidazoleacetic acid	[M+H]+	HMDB0002024	C02835	Organoheterocyclic compounds	Azoles	Imidazoles	23529.3	20582.3	25686.3	24058.7	17032.4	20604	20918.9	17848.2	21908.9	16299.6	18182.7	20379.5	18136.8	21196.4	20451.4	20300.7	20301.7
M139T292	139.049	292.156	4-imidazoleacrylic acid	[M+H]+	HMDB0000301	C00785	Organoheterocyclic compounds	Azoles	Imidazoles	12098.9	13500.7	9649.41	13044.9	13277.4	18820.5	15724.3	36041.2	17886.8	18028.7	13088.5	17202.7	19189.5	17188.8	17646.9	18054.7	18045.9
M105T36	105.069	36.34	4-methylbenzyl alcohol	[M+H-H2O]+	HMDB0041609	C06757	Benzenoids	Benzene and substituted derivatives	Benzyl alcohols	144002	83520.8	88276.5	110779	96322.7	75166	82174.5	87653.3	103870	112785	111032	121050	119275	116547	118821	116624	129372
M538T211	538.346	210.65	4-quinazolinamine, 7-[2-[2-(dimethylamino)ethoxy]ethoxy]-2-(hexahydro-4-methyl-1h-1,4-diazepin-1-yl)-6-methoxy-n-(1-methyl-4-piperidinyl)-	[M+Na]+			Organoheterocyclic compounds	Diazanaphthalenes	Benzodiazines	3791.26	3894.4	2550.12	3751.12	3814.66	4383.72	5772.2	2984.38	3650.65	4868.07	7170.27	5675.78	3382.4	3941.56	4946.95	4743.15	4473.11
M536T403	536.246	403.073	4-tert-butyldimethylsilyloxynebivolol	[M+H]+			Organoheterocyclic compounds	Benzopyrans	1-benzopyrans	1775.56	743.782	1854.55	1103.69	1322.97	812.319	869.692	1991.13	1506.41	5769.39	2829.61	929.392	1442.43	1590.52	1589.07	1593.46	1448.12
M273T398	273.107	398.09	5,2'-O-dimethyluridine	(M+H)+						1607.05	1022.08	1323.35	1820.25	820.183	1251.98	818.113	1979.86	851.547	1093.95	718.402	1635.36	1350.31	1176.57	1011.53	1042.06	1128.97
M515T411	515.116	410.702	5-(3-(2-(7-chloroquinolin-2-yl)ethenyl)phenyl)-8-dimethylcarbamyl-4,6-dithiaoctanoic acid	[M+H]+		C11239	Organoheterocyclic compounds	Quinolines and derivatives	Haloquinolines	4431.02	3208.37	4008.45	834.986	3648.66	6134.64	10865.9	6246.05	10398.2	8764.21	9106.54	12674.4	6024.52	7118.19	5789.63	9043.4	7501.9
M571T420	571.12	420.311	5,7-dihydroxy-2-phenyl-6-[3,4,5-trihydroxy-6-(hydroxymethyl)oxan-2-yl]-8-(3,4,5-trihydroxyoxan-2-yl)chromen-4-one	[M+Na]+	HMDB0140256		Phenylpropanoids and polyketides	Flavonoids	Flavonoid glycosides	27747.7	26985.9	26249.4	5210.83	22404.9	25037.5	22468	25027	27674	22721.9	26357.8	28908.1	24531.5	27299.6	27311.6	26967.1	26029.6
M100T279	100.074	278.681	5-aminovaleric acid	[M+H-H2O]+	HMDB0003355	C00431	Organic acids and derivatives	Carboxylic acids and derivatives	Amino acids, peptides, and analogues	2228.15	2000.55	2041.22	10351.1	2184.09	874.7	1700.56	1620.26	2487.02	1450.93	1659.11	1127.86	1598.81	2258.77	2112.31	2112.56	2170.35
M160T384_2	160.133	384.171	5-aminovaleric acid betaine	[M+H]+			Lipids and lipid-like molecules	Fatty Acyls	Fatty acids and conjugates	3.1242e+06	2.70398e+06	4.31751e+06	3.70882e+06	3.97227e+06	3.86279e+06	3.09589e+06	3.62563e+06	4.34552e+06	2.20482e+06	4.41279e+06	3.86318e+06	3.80626e+06	3.62205e+06	3.62232e+06	3.65482e+06	3.65335e+06
M233T207	233.09	206.768	5-Hydroxyindoleacetate	(M+CH3CN+H)+	HMDB0000763	C05635	Organoheterocyclic compounds	Indoles and derivatives	Indolyl carboxylic acids and derivatives	3659.7	4619.94	3315.63	2805.04	2615.96	4876.79	4332.94	2568.76	2985.8	3174.52	3804.11	3153.33	1954.7	3718.07	3717.81	3806.17	3756.99
M174T366	174.086	365.696	5-methoxytryptamine	[M+H-NH3]+	HMDB0004095	C05659	Organoheterocyclic compounds	Indoles and derivatives	Tryptamines and derivatives	6105.62	7991.76	7201.7	11511	9762.72	8941.71	8782.8	6899.26	7161.55	10536.2	9616.97	7910	10404	7223.92	7077.83	7080.02	7639.15
M129T518	129.064	517.598	5-methyl-5,6-dihydrouracil	[M+H]+	HMDB0000079	C00906	Organoheterocyclic compounds	Diazines	Pyrimidines and pyrimidine derivatives	11943.9	11366.5	10506.4	19515	16452.8	17918.4	13588.9	13359.6	11759.1	13070.3	13351.9	14768.8	11986.5	13107	13114.8	13548.7	13554
M191T254	191.083	254.416	5-methyl-5-phenylhydantoin	[M+H]+			Organoheterocyclic compounds	Azolidines	Imidazolidines	6823.24	14263.4	11866	10624.3	23416.7	12383.4	13853.2	11748	17936.2	11618.7	14226.7	12236	14942.5	12285.5	12365.9	12510.4	12510.6
M126T200	126.065	199.694	5-Methylcytosine	(M+H)+	HMDB0002894	C02376	Organoheterocyclic compounds	Diazines	Pyrimidines and pyrimidine derivatives	6779.62	6232.94	7210.74	5480.77	5384.39	6374.27	7734.05	6892.52	6000.74	7139.17	6435.58	7021.37	4455.32	6293.51	7421.87	6723.3	6269.98
M383T33	383.329	33.331	7.alpha.-hydroxy-4-cholesten-3-one	[M+H-H2O]+	HMDB0001993	C05455	Lipids and lipid-like molecules	Steroids and steroid derivatives	Cholestane steroids	11726.9	22726.9	10632.7	14777.9	15148.8	13842.8	12697.9	8059.79	14208.2	11945.9	12797.8	12231.1	11543.3	22377	22512.4	22380.2	23163.7
M692T379	692.393	378.526	7-benzyl-11,14,20-trimethyl-16-(2-methylpropyl)-10,13-di(propan-2-yl)-17-oxa-1,5,8,11,14-pentazabicyclo[17.3.0]docosane-2,6,9,12,15,18-hexone	[M+Na]+			Organic acids and derivatives	Peptidomimetics	Depsipeptides	6471.13	6734.46	10790.8	2192.79	2006.4	1625.39	6673.09	1902.93	4628.46	7776.93	4792.69	4892.99	1601.42	6268.82	6271.82	5514.67	6273.7
M772T320	772.323	319.677	7-epi-cephalomannine	[M+H-C2H4O2]+			Lipids and lipid-like molecules	Prenol lipids	Diterpenoids	2276.58	1046.63	1951.19	2094.92	952.988	991.175	1294.66	3717.57	4791.54	613.084	3515.23	916.818	1187.75	2378.16	2347.66	2324.35	2378.13
M298T435	298.099	435.287	7-methylguanosine	[M+H]+	HMDB0001107	C20674	"Nucleosides, nucleotides, and analogues"	Purine nucleosides		6431.16	6002.01	6527.43	3693.75	8693.38	6095.29	7151.28	5345.05	5203.39	4671.24	5400.69	5886.1	4315.35	5492.18	5327.79	5465.26	4979.64
M641T220	641.323	219.976	7-(triethylsilyl)-10-deacetylbaccatin iii	[M+H-H2O]+			Lipids and lipid-like molecules	Prenol lipids	Diterpenoids	6920.65	2570.92	1717.96	2815.33	3191.39	2876.78	2800.19	11686.6	5454.09	902.497	10641.3	2773.78	2014.62	4192.69	4252.7	4038.13	4253.08
M204T305	204.122	305.31	Acetylcarnitine	[M+H]+		C02571	Lipids and lipid-like molecules	Fatty Acyls	Fatty acid esters	255575	276679	311474	361411	330025	356154	255417	266748	332737	338610	297830	255790	335231	288249	285724	286940	288248
M146T377	146.116	376.694	Acetylcholine	[M]+	HMDB0000895	C01996	Organic nitrogen compounds	Organonitrogen compounds	Quaternary ammonium salts	112782	102616	105810	119696	87077.4	107852	106389	77459.5	105091	94542.1	123522	106843	103362	105142	103765	104763	108847
M218T405	218.111	404.639	Acetylcitrulline	[M+H]+			Organic acids and derivatives	Carboxylic acids and derivatives	Amino acids, peptides, and analogues	1047.1	21546.1	20626.4	1271.88	5166.1	1479.52	2846.95	3333.65	24955.5	4233.46	3803.62	6337.37	3733.11	4096.01	4201.62	4651.41	4526.38
M136T161	136.06	161.291	Adenine	[M+H]+	HMDB0000034	C00147	Organoheterocyclic compounds	Imidazopyrimidines	Purines and purine derivatives	3326.57	3855.93	4275.24	3480.4	3673.24	4309.98	3623.95	2766.15	4841.69	3317.25	3159.72	3078.8	3305.78	6768.41	7545.13	7554	7553.48
M250T95	250.092	95.01	Adenosine	(M+H-H2O)+	HMDB0000050	C00212	"Nucleosides, nucleotides, and analogues"	Purine nucleosides		51544.7	9887.69	8063.74	14918.5	11230.5	4841.09	2540.76	31214	5734.02	6902.39	8549.38	7423.2	14395.1	21033.2	19309	19923.3	19702.6
M330T290	330.058	290.233	Adenosine 3',5'-cyclic monophosphate	[M+H]+	HMDB0000058	C00575	Nucleosides, nucleotides, and analogues	Purine nucleotides	Cyclic purine nucleotides	2351.04	2438.59	1645.59	1702.64	1695.54	1624.08	1247.75	2693.3	1053.1	1609.72	2011.45	1739.31	1459.74	2183.24	2097	2089.03	2088.9
M428T460	428.034	459.546	Adenosine 5'-diphosphate	[M+H]+	HMDB0001341	C00008	Nucleosides, nucleotides, and analogues	Purine nucleotides	Purine ribonucleotides	1290.38	3177.5	3461.46	3535.96	1040.72	1661.34	2046.71	1831.54	2000.06	1288.77	2737.95	2277.32	1288.5	2753.92	2223.61	2235.12	2338.38
M348T428	348.068	428.012	Adenosine monophosphate (AMP)	(M+H)+	HMDB0000045	C00020	"Nucleosides, nucleotides, and analogues"	Purine nucleotides	Purine ribonucleotides	17192.4	26979.2	27291.2	23144.2	10539.8	10342.6	17812.4	14116.8	26217.8	6988	21266.4	16624	6905.97	20599	20637.4	13795.9	19730
M290T397	290.159	397.388	Adipoyl-l-carnitine	[M+H]+			Lipids and lipid-like molecules	Fatty Acyls	Fatty acid esters	67170.7	50724	26126.9	63815.6	34142.4	58825.6	64698.4	57101.1	37197	57817.7	66782.5	47182.8	97134.3	51746	51742.7	51751.1	54603.2
M329T225	329.058	224.827	Aflatoxin g1	[M+H]+	HMDB0030474	C16755	Phenylpropanoids and polyketides	Coumarins and derivatives	Furanocoumarins	3175.43	3413.96	2858.02	1009.95	4115.47	2319.41	3938.13	1881.94	927.392	4211.34	4537.56	4154.45	4629.23	3997.89	3956.24	4132.9	3931.57
M445T297	445.029	296.814	.alpha.-carboxybenzylpenicillin	[M-2H+3Na]+	HMDB0014717	C06869	Organic acids and derivatives	Carboxylic acids and derivatives	Amino acids, peptides, and analogues	1948.21	5650.51	4867.71	5471.14	9401.74	11579.2	6645.91	3655.58	8621.87	4882.77	4304.66	4278.95	4181.05	5456.94	5818.19	5980.34	5974.51
M729T82	728.597	81.983	.alpha.-galactosyl-n-stearoylsphingosine	[M+H]+			Lipids and lipid-like molecules	Sphingolipids	Glycosphingolipids	12428.6	5227.09	6548.52	5960.83	6835.74	7755.59	4698.59	9822.98	5946.6	6181.31	6743.9	7829.89	11728.1	5470.44	5686.04	4538.45	5669.39
M430T33	430.377	32.6065	(+)-.alpha.-tocopherol	[M]+	HMDB0001893	C02477	Lipids and lipid-like molecules	Prenol lipids	Quinone and hydroquinone lipids	309816	264790	378478	356704	284450	248620	331975	283234	331492	202511	317696	269102	333535	313350	313403	305181	307611
M511T33_2	511.248	33.452	Androstan-3-ol-17-one 3-glucuronide	[M-H+2Na]+	HMDB0004484	C11136	Lipids and lipid-like molecules	Steroids and steroid derivatives	Steroidal glycosides	10448.5	1369.2	9222.09	1082.84	1903.82	49187.2	37703.5	45170.1	26522.4	41349.8	25882	9886.97	12233.7	20652.4	21591.6	19689	20651.7
M785T57	784.58	56.6235	Arachidonoylthiophosphorylcholine	[M+H]+			Organic nitrogen compounds	Organonitrogen compounds	Quaternary ammonium salts	273577	866468	661116	1.04823e+06	960066	934481	960758	228167	1.04935e+06	1.54446e+06	971596	935750	927478	1.0354e+06	905663	1.07354e+06	1.07411e+06
M175T440	175.117	440.052	Arginine	[M+H]+	HMDB0000517	C00062	Organic acids and derivatives	Carboxylic acids and derivatives	Amino acids, peptides, and analogues	17710	29619.6	18102.9	7675.91	35063.1	25371.5	23933.8	35638.6	23253.8	35747.6	25930	23188.6	22461.7	27529.7	27796.8	23794.3	27762.2
M727T415	727.373	415.472	Atazanavir	[M+Na]+	HMDB0015205		Organic acids and derivatives	Carboxylic acids and derivatives	Amino acids, peptides, and analogues	11854.6	3778.05	1916.84	2037.82	4805.52	14591.9	2820.96	10254.7	5229.17	1496.66	16634.6	7883.32	16180.5	7881.64	7883.12	7381.74	7881.36
M344T81_2	344.26	80.611	Avocadyne acetate	[M+NH4]+	HMDB0031048		Lipids and lipid-like molecules	Fatty Acyls	Fatty alcohols	38134.2	32296.3	62463	29508.3	32399.1	17325.4	28198	38357.6	33249	17335.7	29722.4	35990.5	47512.7	38669.2	38933.7	37667.4	36507.9
M189T381	189.097	380.544	Azelaic acid	[M+H]+	HMDB0000784	C08261	Lipids and lipid-like molecules	Fatty Acyls	Fatty acids and conjugates	609.218	753.846	615.65	11549.7	787.729	13108.9	1314.02	645.102	12521.9	654.415	874.669	752.555	722.193	8879.03	1544.79	7267.69	2465.41
M526T390	526.219	389.707	.beta.-d-glucopyranosiduronic acid, 5-[3-[(2,2,3,3-tetramethylcyclopropyl)carbonyl]-1h-indol-1-yl]pentyl	[M+Na]+			Lipids and lipid-like molecules	Fatty Acyls	Fatty acyl glycosides	7800.86	519.012	1332.87	1410.6	820.42	1758.05	796.338	4971.66	1066.68	618.49	4523.01	1315.7	5291.9	1968.15	1896.06	1859.49	1859.2
M118T273_2	118.086	273.462	Betaine	[M+H]+	HMDB0000043	C00719	Organic acids and derivatives	Carboxylic acids and derivatives	Amino acids, peptides, and analogues	2.31115e+06	2.26496e+06	2.95482e+06	2.3929e+06	3.13817e+06	2.29038e+06	2.20322e+06	2.09009e+06	2.37917e+06	1.74013e+06	2.56947e+06	2.12719e+06	2.12766e+06	2.39449e+06	2.36918e+06	2.4207e+06	2.42032e+06
M310T202	310.199	201.612	Beta-octylglucoside	[M+NH4]+			Lipids and lipid-like molecules	Fatty Acyls	Fatty acyl glycosides	9441.57	9505.29	8938.72	9204	7655.72	8227.32	8644.71	8314.54	8453.5	8233.4	8478.76	11004.1	8847.96	12460.3	12046.1	12625.7	12623.1
M583T243	583.251	242.535	Biliverdin	[M+H]+	HMDB0001008	C00500	Organoheterocyclic compounds	Tetrapyrroles and derivatives	Bilirubins	3698.63	3892.14	7073.13	3181.94	3386.8	3591.66	6737.63	4564.8	5158.26	2063.97	4526.09	3077.92	3626.21	5869.78	5865.11	5850.76	6702.92
M413T353_2	413.263	353.14	Bimatoprost isopropyl ester	[M+H-H2O]+			Lipids and lipid-like molecules	Fatty Acyls	Eicosanoids	5713.49	5669.74	10214.2	5342.06	4982.62	6569.59	5622.62	5503.12	4628.4	12380	12098.1	3948.21	4920	6776.28	6568.96	6513.78	6931.86
M116T316	116.069	315.981	Captopril	[M+H-C4H6SO]+	HMDB0015328	C06867	Organic acids and derivatives	Carboxylic acids and derivatives	Amino acids, peptides, and analogues	33350.3	29925.9	33480.4	41855.4	27780.1	19082.3	17961.1	42221.1	36157.3	14173.6	36753.1	19086.5	25840.6	23088.8	19294.8	20239.2	19527
M593T286	593.329	285.78	Carbenoxolone	[M+Na]+			Lipids and lipid-like molecules	Prenol lipids	Triterpenoids	5367.75	2200.72	715.257	1727.73	1864.79	2291.75	775.334	889.789	2338.51	760.596	2675.85	951.913	1408.05	3379.08	3099.99	3098.22	3099.78
M162T355_2	162.112	355.338	Carnitine	[M+H]+	HMDB0000062	C00318	Organic nitrogen compounds	Organonitrogen compounds	Quaternary ammonium salts	1.28821e+06	992581	1.38029e+06	892185	741504	518670	642315	877363	981252	698123	1.06019e+06	867542	923159	954006	896579	872482	871326
M653T445	653.097	445.285	Caylin-1	[M+H+4i]+						3849.24	4143.45	6322.18	20448.1	2384.1	2794.84	2584.37	3428.88	2539.9	1938.67	2429.68	3191.3	2030.71	2435	2827.7	2558.6	2214.69
M393T34	393.284	34.149	Chenodeoxycholate	[M+H]+	HMDB0000518	C02528	Lipids and lipid-like molecules	Steroids and steroid derivatives	Bile acids, alcohols and derivatives	129989	116566	210776	95880	146597	101397	123014	123711	110259	115468	95438.6	144328	210966	144454	144538	147589	151132
M367T32	367.334	32.0505	Cholecalciferol (Vitamin D3)	(M+H-H2O)+	HMDB0000876	C05443	Lipids and lipid-like molecules	Steroids and steroid derivatives	Vitamin D and derivatives	15336.6	25519.3	24029.1	19579.8	23759.6	20786.1	12463.9	13773.9	17492	6818.26	25201.2	10631	15746.1	29449.3	23457.9	24314.9	23528.4
M240T217	240.1	217.486	Clomazon	[M+H]+		C11095	Benzenoids	Benzene and substituted derivatives	Halobenzenes	13965.1	15065.5	18562.2	14943.9	14318.4	14748	15473.5	12792.1	21049.3	11497.3	14877.1	15848.7	11813.2	17800	17190.4	17579	18378.8
M365T404	365.14	404.265	Coniferin	[M+Na]+	HMDB0013682	C00761	Organic oxygen compounds	Organooxygen compounds	Carbohydrates and carbohydrate conjugates	4206.15	3858.3	3881.77	5099.41	867.849	2288.02	2002.57	4103.06	15100.7	2849.8	2571.04	3677.86	3778.28	2555.63	3370.34	2670.81	2950.67
M132T349	132.075	348.647	Creatine	[M+H]+	HMDB0000064	C00300	Organic acids and derivatives	Carboxylic acids and derivatives	Amino acids, peptides, and analogues	91651	50045.1	51542.2	56561.6	36440.7	40139.5	49314.5	76531.2	49282.7	34705.2	50321	46327.1	49263.8	51490	50140.9	48818.2	48800.2
M114T169_2	114.065	169.011	Creatinine	[M+H]+	HMDB0000562	C00791	Organic acids and derivatives	Carboxylic acids and derivatives	Amino acids, peptides, and analogues	197956	188886	171843	211538	160599	244214	200912	208956	199861	251415	213567	189317	180984	199538	206349	208610	209811
M266T239	266.073	239.262	Cytidine	[M+Na]+	HMDB0000089	C00475	"Nucleosides, nucleotides, and analogues"	Pyrimidine nucleosides		47298.1	44790.6	24270.7	31071.5	32755.7	35735.4	39034.9	32341.8	32440.5	24882.8	43997.6	36399	29970.6	45574.6	45815.5	46238.2	46230.5
M611T409	611.067	408.796	Cytidine 2',3'-cyclic monophosphoric acid	[2M+H]+			Nucleosides, nucleotides, and analogues	Pyrimidine nucleotides	Cyclic pyrimidine nucleotides	7042.06	4730.29	6985.58	4191.04	4777.78	4167.53	4878.01	4477.27	5296.36	3728.06	4497.4	4872.91	2588.6	5193.98	5279.47	4754.26	4283.49
M324T162	324.075	162.458	Cytidine 5'-monophosphate	[M+H]+	HMDB0000095	C00055	Nucleosides, nucleotides, and analogues	Pyrimidine nucleotides	Pyrimidine ribonucleotides	58497	70791.6	59518.9	54866	58749.3	18431.3	37086	57821.2	49181	17466.9	53101.2	49647.3	45663.9	54258.6	51681	53824.8	51707.3
M444T425	444.253	425.258	Cytochalasin b	[M+H-2H2O]+		C19954	Alkaloids and derivatives	Cytochalasans	Cytochalasins	2054.59	602.13	516.839	684.595	418.207	873.045	822.744	872.559	737.129	654.392	1607.62	586.572	22806.2	1804.58	1922.42	1963.55	1963.74
M434T408	434.258	408.171	Cytochalasin j	[M+H-H2O]+			Organoheterocyclic compounds	Isoindoles and derivatives	Isoindoles	6307.41	904.464	1067.37	2763.37	5894.14	5300.92	2337.26	15569.8	2379.92	509.325	12247.9	2828.74	4767.52	5361.03	5477.86	5650.91	5743.78
M112T206	112.05	206.243	Cytosine	[M+H]+	HMDB0000630	C00380	Organoheterocyclic compounds	Diazines	Pyrimidines and pyrimidine derivatives	76414	85411.3	76926	87611.3	78007	92753.7	105325	63590.6	81360.4	65733.9	82784.2	75435.1	69626.2	85000.4	84999.4	85686.3	85684.7
M316T191	316.246	190.503	Decanoyl-l-carnitine	[M+H]+	HMDB0062631		Lipids and lipid-like molecules	Fatty Acyls	Fatty acid esters	13253.2	6728.41	5451.43	10243.3	9746	10965	10315.8	10692.7	5812.08	5002.61	4146.24	4000.52	11820.4	10539.2	10197.9	10095.9	10249.6
M187T408	187.07	408.002	Deoxyvasicinone	[M+H]+		C10659	Organoheterocyclic compounds	Diazanaphthalenes	Benzodiazines	68419.9	177347	66587.4	119456	70188.3	65886.8	76496.1	217047	187962	218511	70543.1	87224.2	76552.4	75192.4	76379.6	78414.4	76062.4
M111T159	111.054	159.388	D-erythro-imidazolylglycerol phosphate	[M+H-CH5O5P]+		C04666	Organic acids and derivatives	Organic phosphoric acids and derivatives	Phosphate esters	5292.81	8691.74	14648.7	7903.87	18620.5	21944.9	11256.2	10639	14434.4	16903.2	8300.77	10669.3	15246.4	9830.04	7086.35	10043	10050.7
M249T314	249.003	313.715	D-glucarate	[M+K]+	HMDB0000663	C00818	Organic oxygen compounds	Organooxygen compounds	Carbohydrates and carbohydrate conjugates	8168.84	9464.24	8486.14	5626.14	7293.45	8100.89	9532.57	6073.61	7380.27	9175	9287.39	10435.7	8097.05	9825.03	10252.3	10294.2	10127
M279T156	279.157	155.52	Dibutyl phthalate	[M+H]+	HMDB0033244	C14214	Benzenoids	Benzene and substituted derivatives	Benzoic acids and derivatives	24852.4	24609.4	26243.5	24170	25367.8	27056.9	25909.8	25802.8	26741.9	25367.5	26504.6	25605.5	25989.4	28267.9	27391.1	32534.4	25917.9
M238T207	238.104	207.364	Dicrotophos	[M+H]+		C18656	Organic acids and derivatives	Organic phosphoric acids and derivatives	Phosphate esters	4008.26	4556.35	2628.42	5051.33	4059.6	5466.69	4591	5832.27	3988.95	3734.23	5863.06	3202.24	3718.86	4719.2	4603.14	4602.04	4977.88
M447T106	447.344	106.465	Didecyl phthalate	[M+H]+		C14505	Benzenoids	Benzene and substituted derivatives	Benzoic acids and derivatives	8124.45	9817.17	13300.8	9520.71	9438.42	6406.48	11468.1	9254.42	9250.98	5971.61	7230.67	8432.33	7317.03	7283.85	7661.1	7284.89	7307.68
M515T32_2	515.412	31.766	Didodecyl 3,3'-thiodipropionate	[M+H]+	HMDB0040172		Organic acids and derivatives	Carboxylic acids and derivatives	Dicarboxylic acids and derivatives	8.03745e+06	5.65029e+06	6.75686e+06	6.14992e+06	6.40839e+06	5.96727e+06	6.80258e+06	7.21299e+06	6.9475e+06	7.25299e+06	6.8046e+06	6.86438e+06	7.16659e+06	7.54476e+06	7.35326e+06	7.54723e+06	7.45441e+06
M531T32_3	531.404	32.051	Didodecyl 3,3'-thiodipropionate oxide	[M+H]+			Organic acids and derivatives	Carboxylic acids and derivatives	Dicarboxylic acids and derivatives	126317	105961	156210	108431	139372	85302.1	110133	104681	115227	90706.1	118064	130139	96178.2	267973	266961	266970	270454
M381T27	381.348	26.64	Dihydrotachysterol	(M+H-H2O)+	HMDB0015203	C06957	Lipids and lipid-like molecules	Steroids and steroid derivatives	Vitamin D and derivatives	4347.64	4949.23	4900.65	3648.77	3120.44	5109.49	5916.49	2634.91	4027.94	5017.67	5711.42	3812.98	5463.35	4137.27	4138.63	4209.77	4345.12
M115T324	115.049	323.732	Dihydrouracil	[M+H]+	HMDB0000076	C00429	Organoheterocyclic compounds	Diazines	Pyrimidines and pyrimidine derivatives	3072.2	2616.02	1829.25	3546.93	3111.52	2326.69	2320.41	3401.64	2066.9	2131.28	2145.51	1639.86	2192.1	2572.39	2603.45	2559.87	2559.97
M227T344	226.986	344.479	Dimethyl sulfone	(2M+K)+	HMDB0004983	C11142	Organosulfur compounds	Sulfonyls	Sulfones	523211	574227	525376	581757	577839	600725	618983	529147	578049	569864	568939	300280	547976	570299	579749	578274	579684
M101T384	101.058	384.164	Dl-2,4-diaminobutyric acid	[M+H-H2O]+	HMDB0002362	C03283	Organic acids and derivatives	Carboxylic acids and derivatives	Amino acids, peptides, and analogues	21582.3	18393.1	30010.2	23150.4	27398.5	26931.9	20879.4	27130.4	30787.8	16526.5	28843.9	27310.8	29024	25839.1	26308.7	25851.6	27655.1
M134T50	134.062	49.6265	DL-.alpha.-Phenylglycine	(M+H-H2O)+						10154	7098.96	12312.2	5377.29	18106.1	1568.2	5200.33	8342.26	5896.41	3127.9	7252.45	5358.18	7897.07	7983.18	9250.28	9334.56	9322.02
M175T580	175.118	579.583	DL-Arginine	(M+H)+	HMDB0000517/HMDB0003416	C00062/C00792	Organic acids and derivatives	Carboxylic acids and derivatives	"Amino acids, peptides, and analogues"	596526	622953	146660	121961	334812	311509	289561	92032.8	228610	316563	405476	201699	99880	193745	224653	213196	274710
M147T380	147.075	379.767	DL-glutamine	[M+H]+		C00303	Organic acids and derivatives	Carboxylic acids and derivatives	Amino acids, peptides, and analogues	354788	341478	335449	385707	339862	284077	299085	269615	286450	247165	303390	298253	266184	311365	308090	309440	311353
M188T256	188.069	256.468	DL-Indole-3-lactic acid	(M+H-H2O)+						118116	182979	91543.6	134698	57438.2	130974	167582	75538.9	202379	84080.2	171641	155344	100361	172731	163688	173572	173350
M146T253	146.116	252.667	Dl-norleucine methyl ester	[M+H]+			Organic acids and derivatives	Carboxylic acids and derivatives	Amino acids, peptides, and analogues	10305.9	14002.3	1191.91	722.75	2981.19	786.56	1549.26	2638.55	2399.72	9001.51	13975.9	1468.83	4324.07	13067.6	13071.7	13348	14042.6
M134T29_2	134.059	28.812	Dl-normetanephrine	[M+H-CH6O2]+	HMDB0000819	C05589	Benzenoids	Phenols	Methoxyphenols	55698.4	86419.6	50717.1	50699.8	70928.3	28773.8	95726.1	42699.6	63790.6	32555.8	87253.4	74827.2	60358.3	75177.4	72628.1	76278	79073.5
M156T298	156.041	298.166	DL-Norvaline	(M+K)+						9591.63	11369.1	12644.2	12560.9	11285	12553.2	10091.1	8770.96	11690.1	8406.08	11917.1	10189.5	8239.34	10278.2	10876.4	10874.9	10782.2
M166T261	166.085	260.725	DL-phenylalanine	[M+H]+		C02057	Organic acids and derivatives	Carboxylic acids and derivatives	Amino acids, peptides, and analogues	153607	205206	129944	147576	206158	187479	198168	140550	164107	145379	190182	144930	143768	188997	194871	198300	198188
M229T368	229.153	367.596	Dl-tmap	[M]+			Organic acids and derivatives	Carboxylic acids and derivatives	Amino acids, peptides, and analogues	46106.4	38106.4	29923.7	34730.9	30816.7	34891.7	33866.5	37863.3	34447.1	33477.3	46842.1	30050.2	36071.9	41026.3	41020	41563.9	42222.2
M205T257	205.095	256.764	DL-tryptophan	[M+H]+	HMDB0030396	C00078	Organoheterocyclic compounds	Indoles and derivatives	Indolyl carboxylic acids and derivatives	38122.8	58650.9	31366.8	44104.3	17130.2	41051.8	53265.7	26126	60219.4	26150	52495.6	53251.2	25436.8	55846	52928.6	55797.2	56150
M182T298	182.079	297.933	DL-tyrosine	[M+H]+	HMDB0000158	C00082	Organic acids and derivatives	Carboxylic acids and derivatives	Amino acids, peptides, and analogues	4152.21	5179.07	3180.68	5338.64	3892.11	5201.07	4265.69	4637.03	4898.69	4441.94	5127.68	4415.48	3273.39	5033.16	5048.48	5720.06	5297.86
M544T296	544.169	296.156	Doxorubicin	[M+H]+	HMDB0015132	C01661				9671.55	11753.3	10301.6	11868.5	8866.73	9943.73	8747.32	9460.61	10693.1	8361.52	10093	9442.28	9128.18	10023.9	9805.08	9829.91	11352.7
M143T327	143.08	326.976	Ectoine	[M+H]+		C06231	Organic acids and derivatives	Carboxylic acids and derivatives	Amino acids, peptides, and analogues	21156.4	22558.2	19380.1	14884.3	26468.8	27729	25689.5	18150	26914.9	27612.6	26110.2	27246.5	26317.9	25266.8	26137.9	26692.8	26660.4
M299T184	299.137	184.471	Enterolactone	[M+H]+	HMDB0006101	C18165	Lignans, neolignans and related compounds	Furanoid lignans	Tetrahydrofuran lignans	1894.06	240.584	2220.48	903.24	3055.33	1490.52	1941.11	2220.96	974.749	1229.78	1165.7	694.561	1710.13	1537.04	2065.12	1576.6	1551.2
M230T326_1	230.094	325.825	Ergothioneine	(M+H)+	HMDB0003045	C05570	Organic acids and derivatives	Carboxylic acids and derivatives	"Amino acids, peptides, and analogues"	2207.23	1976.71	1805.7	1817.59	896.663	1900.8	1442.53	1241.7	2621.4	959.929	3599.28	2343.81	8312.07	2890.86	2735.24	2834.82	2917.94
M338T34_2	338.341	34.043	Erucamide	[M+H]+			Lipids and lipid-like molecules	Fatty Acyls	Fatty amides	163997	205102	391729	497765	245802	329677	373479	1.20594e+06	804700	575816	1.44784e+06	1.27257e+06	1.07786e+06	1.51873e+06	1.55459e+06	1.53235e+06	1.51889e+06
M115T232	115.049	232.434	Ethyl hydrogen malonate	[M+H-H2O]+	HMDB0000576		Organic acids and derivatives	Carboxylic acids and derivatives	Dicarboxylic acids and derivatives	3923.4	5533.23	4204.36	3983.05	11116.4	7746.77	9174.49	4716.79	6697.8	7015.64	5901.26	7395.45	3270.81	6768.39	6788.39	7077.19	7200.11
M361T386	361.085	386.01	Ethyl loflazepate	[M+H]+			Organic acids and derivatives	Carboxylic acids and derivatives	Amino acids, peptides, and analogues	5154.64	6232.27	4979.19	6325.76	5449.02	4685.31	7998.95	5915.69	5932.64	7567.05	5839.02	6085.95	3985.49	7623.32	6472.05	6652.69	6463.93
M617T411	617.074	411.418	Fensulfothion	[2M+H]+		C14510	Organic acids and derivatives	Organic thiophosphoric acids and derivatives	Thiophosphoric acid esters	1853.02	4601.11	3046.31	1092.94	3262.29	4084.31	3985.76	3188.43	4981.56	2750.29	3063.55	4695.09	4165.54	3835.15	3832.91	2990.06	3620.61
M511T294	511.047	293.716	Flufenoxuron	[M+Na]+		C18430	Benzenoids	Benzene and substituted derivatives	N-phenylureas	1236.79	1049.21	1329.71	582.639	2648.42	1913.22	1796.34	1840.87	1286.42	2667.62	1330.27	1201.73	2708.65	1035.57	1626.08	1484.37	1708.27
M495T33	495.254	32.862	Flumethasone pivalate	[M+H]+	HMDB0014801		Lipids and lipid-like molecules	Steroids and steroid derivatives	Pregnane steroids	19019.1	2152.79	14905.5	3234.09	7712.4	69283.9	48962.8	62422	46259.4	68864.2	37433.1	19572.6	20689.4	31804	36459.5	32941	31788.1
M439T377	439.079	377.305	Fraxetin	[2M+Na]+		C09265	Phenylpropanoids and polyketides	Coumarins and derivatives	Hydroxycoumarins	15218.3	22670.4	15245.9	10608.8	15440.1	26559.9	28359.5	10203.1	23954.9	16837	17835.6	25707.5	13410.3	24696.6	24701.9	25696.9	26508.5
M167T37	167.153	36.748	.gamma.-undecalactone	[M+H-H2O]+	HMDB0038311	C08571	Organoheterocyclic compounds	Lactones	Gamma butyrolactones	64862	75617.5	65026.5	72051.9	85548.2	81224.3	52427.1	91331.3	62820.7	93224.6	73443	48143.8	53168.4	65034.1	65839.1	64194.8	64125.1
M359T394	359.122	393.607	Gardenin b	[M+H]+		C15109	Phenylpropanoids and polyketides	Flavonoids	O-methylated flavonoids	36109.9	43061.8	36328	36391.9	26880.8	47449.8	40375.4	22921.1	38899.2	93700.2	32228.1	34444.9	35181.8	24454.5	25175.8	23692.6	28055
M411T17	411.12	16.842	Geniposide	[M+Na]+		C09781	Lipids and lipid-like molecules	Prenol lipids	Terpene glycosides	1138.67	1471.88	1280.06	1187.82	1195.5	1065.04	1155.67	1344.64	1206.01	1217.05	1303.05	1279.04	1218.01	1244.93	1256.27	1245.33	1374.82
M146T359	146.091	358.815	G-guanidinobutyrate	[M+H]+	HMDB0003464	C01035	Organic acids and derivatives	Carboxylic acids and derivatives	Amino acids, peptides, and analogues	4080.12	3967.72	5542.03	6100.71	2703.31	3956.51	3136.53	7153.04	3964	2529.72	6149.21	1516.38	5852.94	5254.75	5254.12	5010.42	5198.02
M246T415_2	246.154	415.428	Gln-val	[M+H]+	HMDB0028810		Organic acids and derivatives	Carboxylic acids and derivatives	Amino acids, peptides, and analogues	3046.47	651.119	2179.14	887.302	1634.69	901.795	1066.59	12072.4	2243.5	1460.51	3788.36	1728.69	21622.4	3208.01	3620.99	3545.04	3268.4
M374T411	374.237	410.544	Gln-Val-Lys	[M+H]+			Organic acids and derivatives	Carboxylic acids and derivatives	Amino acids, peptides, and analogues	4611.58	721.449	1480.84	1242.32	3945.19	1525.23	1023.51	5149.12	729.713	806.179	9239.05	2751.71	4736.06	3531.96	3961.6	3773.31	4123.05
M182T87	182.047	87.051	Glufosinate	[M+H]+		C05042	Organic acids and derivatives	Carboxylic acids and derivatives	Amino acids, peptides, and analogues	14802.6	22041.6	13635	15515.2	25001.6	2085.9	12913.1	9778.52	16073.4	4331.86	9170.05	12172.7	19293.7	12172.2	12191.2	12589.7	14379.5
M83T398	83.0594	398.299	Glutaraldehyde	[M+H-H2O]+	HMDB0029599	C12518	Organic oxygen compounds	Organooxygen compounds	Carbonyl compounds	7050.23	10600.7	14161	12783.2	21275.6	19031.6	15730.3	2622.86	12292.2	12180.4	15839.7	17056.6	18334.3	15036.1	15573.2	17101.6	15058.5
M613T493	613.156	493.483	Glutathione, oxidized	[M+H]+	HMDB0003337	C00127	Organic acids and derivatives	Carboxylic acids and derivatives	Amino acids, peptides, and analogues	3309.41	2956.46	2440.91	2281.06	2014.63	2405.78	2191.74	1888.67	4108.18	2057.87	2644.33	2792.24	1406.34	3096.22	2981.3	2979.9	3090.45
M258T385	258.11	385.435	Glycerophosphocholine	[M+H]+	HMDB0000086	C00670	Lipids and lipid-like molecules	Glycerophospholipids	Glycerophosphocholines	1.50279e+06	1.99661e+06	1.2531e+06	1.78187e+06	1.99943e+06	1.4802e+06	2.60605e+06	1.72936e+06	1.73046e+06	2.04222e+06	1.83538e+06	1.70776e+06	1.35077e+06	1.66709e+06	1.66709e+06	1.67739e+06	1.68025e+06
M246T394	246.107	393.545	Gly-Glu	(M+CH3CN+H)+						1062.71	1741.03	2497.53	1706.54	3685.7	1126.91	1194.8	1529.89	2396.1	1553.67	1517.9	2062.07	1690.1	1441.02	1437.76	1441.03	1437.76
M361T390	361.17	389.737	Gly-Gly-Gly-Gly-Gly-Gly	[M+H]+			Organic acids and derivatives	Carboxylic acids and derivatives	Amino acids, peptides, and analogues	2572.85	557.13	873.877	539.83	1134.54	1249.41	600.556	2417.12	754.537	420.181	2317.65	1158.95	1715.98	1423.06	1370.34	1475.98	1371.31
M130T467	130.048	466.891	Goitrin	[M+H]+		C16817	Organoheterocyclic compounds	Azolidines	Oxazolidines	64925.7	59505.1	52250.9	70850.9	64333.1	51417	58196.9	47442.4	72566.1	49518	45623.1	49324	42319.5	46350.2	46543.8	46384.3	14634.2
M130T87	130.064	86.848	Gramine	[M+H-C2H7N]+	HMDB0035762	C08304	Organoheterocyclic compounds	Indoles and derivatives	Indoles	118542	34548.6	50801.3	62629	31636.2	27353.4	36788.9	97900.6	119570	32937.3	55663.3	81441.3	90548.1	75918.6	81961	68846.9	89002.7
M288T39	288.288	38.9365	Heptadecasphinganine	[M+H]+			Organic nitrogen compounds	Organonitrogen compounds	Amines	14329.1	45186.1	55791	36031.5	245985	4529.7	24073.5	27319.5	72594.7	42624.9	36247.4	38074.1	53902.6	68052.7	52901.1	67928.6	67938.2
M597T35	597.267	34.8035	Herbimycin a	[M+Na]+		C11225				842.334	762.61	862.276	1271.77	2536.67	720.633	1507.59	800.769	824.507	1091.11	1649.89	909.358	1345.67	619.115	865.805	606.147	666.353
M260T223	260.185	222.771	Hexanoyl-l-carnitine	[M+H]+	HMDB0000756		Lipids and lipid-like molecules	Fatty Acyls	Fatty acid esters	129087	67796.4	53221.8	137082	83383	129913	91458.5	83935.6	93589.7	62098.5	55364.1	71260.6	104731	115230	115219	115233	119206
M230T326_2	230.138	325.631	His-Phe-Arg	[M+2H]2+			Organic acids and derivatives	Carboxylic acids and derivatives	Amino acids, peptides, and analogues	10930.2	11261.9	11801	10439.3	12659.4	11230.2	10844.7	12806.1	11010.8	12545.2	10419.7	11477.1	7922.31	10458.6	10348	10462.5	9796.82
M112T54	112.074	53.795	Histamine	[M+H]+	HMDB0000870	C00388	Organic nitrogen compounds	Organonitrogen compounds	Amines	25159.6	22571.4	23610.3	21430.6	22641.2	6604.21	25552.8	24314.2	18911.5	9176.95	20619.8	18771.7	22507.1	22666.1	23824.6	22663.7	22934.6
M156T400	156.076	400.229	Histidine	[M+H]+	HMDB0000177	C00135	Organic acids and derivatives	Carboxylic acids and derivatives	Amino acids, peptides, and analogues	269628	247470	489880	338324	672070	588968	564722	530341	483663	160528	337582	508014	416100	300363	266593	264147	285288
M136T349	136.047	348.676	Homocysteine	[M+H]+		C00155				102466	71707.5	71153.2	80751	53799.7	60275.1	73074.6	84479.5	68138.6	53311.1	75431.7	69785.6	69420.1	69832.6	69884.2	68589.8	68567.4
M158T172	158.116	171.669	Homostachydrine	[M+H]+	HMDB0033433	C08283	Organic acids and derivatives	Carboxylic acids and derivatives	Amino acids, peptides, and analogues	20745.4	31529.7	13917	32679.8	27584.9	34856.5	29306.2	16941.9	22218.2	26563.7	28095.7	28168.4	23668.1	20687.6	20691.4	20969.8	20967.9
M537T32	537.392	32.089	Hyperforin	[M+H]+		C07608	Lipids and lipid-like molecules	Prenol lipids	Monoterpenoids	412568	320386	364422	378496	327805	574455	311804	386243	329288	617869	325291	387044	384762	383121	378037	383136	379860
M233T240	233.148	239.663	Ile-Thr	[M+H]+			Organic acids and derivatives	Carboxylic acids and derivatives	Amino acids, peptides, and analogues	3705.59	1755.5	582.53	738.922	2419.15	1626.16	421.711	5005.31	1217.09	1323.21	3809.09	1922.55	3547.62	2434.34	2434.88	2434.73	2574.6
M69T364	69.0438	364.439	Imidazole	[M+H]+	HMDB0001525	C01589	Organoheterocyclic compounds	Azoles	Imidazoles	7719.83	6884.19	11432.9	5863.41	5006.79	11312.5	6079.53	5455.68	6159.25	11445.8	9822.03	4204.28	10492.9	7020.25	7009.71	8230.94	7450.08
M127T276	127.049	275.638	Imidazoleacetic acid	(M+H)+	HMDB0002024	C02835	Organoheterocyclic compounds	Azoles	Imidazoles	53515.3	65223	55736.3	61748.9	57284.8	49066.1	57966.7	51048.6	52032.6	41085.7	47445.4	55840	56062.5	54858.5	52973.8	54052.6	52343
M175T50	175.085	50.245	Indole-3-acetamide	[M+H]+	HMDB0029739	C02693	Organoheterocyclic compounds	Indoles and derivatives	Indoles	46780.7	48586.5	36957.8	47022.3	39069	7207.46	40019.5	55377.8	38151	25291.5	41982.3	49441.6	48170.6	36068.9	36079	35232.8	35226.1
M157T89	157.082	89.474	Indole-3-acetonitrile	[M+H]+	HMDB0006524	C02938	Organoheterocyclic compounds	Indoles and derivatives	Indoles	85100.5	69705.2	49612	103983	29225	48952.9	129424	39919.1	42470	50624.4	60154.2	139644	94516.4	75221.7	86146.5	75085.6	75159
M158T125	158.059	124.733	Indoleacetic acid	(M+H-H2O)+	HMDB0000197	C00954	Organoheterocyclic compounds	Indoles and derivatives	Indolyl carboxylic acids and derivatives	59921.9	62985.6	58257.7	79496.8	43145.7	29121.6	68762.8	50198.6	67437.3	17454.3	61965.9	68405.9	26754.5	45568.7	20879.5	45601.2	45652.1
M170T256	170.058	256.269	Indoleacrylic acid	(M+H-H2O)+	HMDB0000734		Organoheterocyclic compounds	Indoles and derivatives	Indoles	2925.24	3473.24	1953.37	2640.08	1250.33	3523.45	3894.25	1804.47	4075.18	2133.3	2501.34	2771.59	2890.52	3464.67	3777.95	4298.21	3589.79
M156T517	156.075	517.258	Indolmycin	[M+H-C3H6N2O2]+			Organoheterocyclic compounds	Indoles and derivatives	Indoles	20351.7	26219.8	21530.4	36350.7	35851.1	36702.8	25623.7	26633.2	20989.3	22365.3	25685.7	25644.2	23066.2	23426	25478.6	25215.7	25409.1
M331T110	331.189	110.484	Ingenol	[M+H-H2O]+		C09112	Lipids and lipid-like molecules	Prenol lipids	Diterpenoids	10225.7	7536.11	8555.63	11530.7	8292.32	3110.84	13478.8	3585.22	6796.69	4277.32	7717.97	8451.5	4003.91	4495.51	5164.19	5362.26	5359.98
M588T296	588.206	295.909	Ipecoside	[M+Na]+		C09464	Lipids and lipid-like molecules	Prenol lipids	Terpene glycosides	2834.87	3747	3096.49	4220.02	3085.41	3417.63	3327.51	3191.43	3048.49	3679.89	3290.89	3311.29	3165.41	3186.19	3446.51	3124.24	3122.8
M232T257	232.154	256.958	Isobutyryl-l-carnitine	[M+H]+	HMDB0000736		Lipids and lipid-like molecules	Fatty Acyls	Fatty acid esters	752236	459177	607054	1.69622e+06	620645	480753	290557	447742	934645	493212	569788	705889	751126	731935	732048	738451	748810
M589T109	589.441	109.259	Isopropyl dodecylfluorophosphonate	[2M+H]+			Organic acids and derivatives	Organic phosphonic acids and derivatives	Phosphonic acid esters	2732.89	2878.8	3231.58	4358.28	3347.62	2494.3	3422.28	6197.63	4892.25	1603.89	1793.62	4308.53	3202.49	3061.25	2905.54	2791.25	3081.76
M194T329	194.116	328.767	Isoproterenol	[M+H-H2O]+	HMDB0015197	C07056	Benzenoids	Phenols	Benzenediols	8455.33	7430.46	8412.1	8055.39	8623.94	11815.9	8733.02	8475.65	6996.2	13640.8	8169.88	7722.86	9033.71	8213.77	8613.4	8631.28	8478.68
M365T398	365.104	397.632	Lactose	[M+Na]+	HMDB0000186	C00243	Organic oxygen compounds	Organooxygen compounds	Carbohydrates and carbohydrate conjugates	3425.58	3696.28	3652.08	3660.73	2937.61	4863.7	3543.62	4468.05	18305.1	3679.17	4195.21	3520.22	3712.13	5401.88	5499.71	5530.16	5411.88
M134T349	134.017	348.647	L-Alanine	(M-H+2Na)+	HMDB0000161	C00041	Organic acids and derivatives	Carboxylic acids and derivatives	"Amino acids, peptides, and analogues"	45833.2	42516.8	31536.3	38124.5	35771.5	39960.6	35496.1	47027.9	51127.6	30544.3	52624.8	29156.4	33916.9	46363	46001.8	46000.8	46656.8
M241T415	241.128	414.528	L-Anserine	(M+H)+	HMDB0000194	C01262	Organic acids and derivatives	Peptidomimetics	Hybrid peptides	15701.8	10253.4	6620.79	10388.5	9476.01	12091.8	14558.5	15004.8	12354.3	11377.5	16210.5	9379.06	12011.8	14380	14574.6	13842.2	14677.1
M356T199	356.241	199.073	Lappaconitine	[M+H-C10H15O5N]+		C08694	Lipids and lipid-like molecules	Prenol lipids	Diterpenoids	2185.63	2602.7	1818.33	2207.57	1569.78	1051.61	1922.46	2274.8	2829.53	2879.99	2021.48	2300.89	1645.28	2556.85	2731.42	2730.8	2727.97
M175T546	175.118	546.348	L-Arginine	(M+H)+	HMDB0000517	C00062	Organic acids and derivatives	Carboxylic acids and derivatives	"Amino acids, peptides, and analogues"	39365.9	49655	60272	68465.8	135252	64081.3	72292.3	22047.7	65879.4	52558.5	60574.9	85965.2	54371.7	137334	175423	7645.62	162034
M130T204	130.063	204.311	L-arginine, methyl ester	[M+H-CH5N3]+			Organic acids and derivatives	Carboxylic acids and derivatives	Amino acids, peptides, and analogues	11779.8	23585.1	12160	20710.1	11120.9	18112.6	15408.5	15912.1	18392.8	16222.7	21405.7	17943.5	17120.1	14845.3	14732.3	14717.9	14134.4
M343T169	343.293	169.478	Lauramidopropylbetaine	[M]+			Organic acids and derivatives	Carboxylic acids and derivatives	Amino acids, peptides, and analogues	2117.91	1647.36	5036.25	994.456	22567.6	8743.71	2636.11	1699.56	7639.61	806.141	2631.78	748.943	2352.79	1425.69	908.946	1411.68	1348.87
M344T183	344.277	183.124	Lauroyl-l-carnitine	[M+H]+	HMDB0002250		Lipids and lipid-like molecules	Fatty Acyls	Fatty acid esters	29681.2	26731.3	11273.6	42956.2	27168.1	46555.9	44047.3	25476.8	23693.9	25189.3	16819.4	20388.9	36137.6	28201.4	29251	23991.4	29169
M227T424	227.112	423.501	L-carnosine	[M+H]+	HMDB0000033	C00386	Organic acids and derivatives	Peptidomimetics	Hybrid peptides	6199.69	1829.76	4281.43	3305.74	3061.62	3943.26	4008.44	4736.92	4838.33	3832.66	3355.52	2420.99	2441.72	5581.4	5471.9	4599.49	5581.54
M147T164	147.075	164.44	L-Glutamine	(M+H)+	HMDB0000641	C00064	Organic acids and derivatives	Carboxylic acids and derivatives	"Amino acids, peptides, and analogues"	2655.67	2686.03	2174.59	1634.4	2229.94	2482.05	1814.71	2393.04	2188.72	2559.38	2949.99	2827.63	2302.02	2421.42	2337.18	2334.49	2659.37
M276T402	276.142	401.832	L-glutarylcarnitine	[M+H]+	HMDB0013130		Lipids and lipid-like molecules	Fatty Acyls	Fatty acid esters	4500.73	4856.07	4502.51	3669.51	3732.12	5555.31	5061.47	4728.17	4028.25	4518.62	5305.17	3339.45	6436.51	5268.64	5267.78	5692.42	5268.79
M308T415	308.09	414.612	L-glutathione, reduced	[M+H]+	HMDB0062697	C00051	Organic acids and derivatives	Carboxylic acids and derivatives	Amino acids, peptides, and analogues	1535.51	1670.28	1930.89	1788.17	1740.26	2645.19	1856.49	2214.74	2761.25	1348.49	4273.39	1558.16	852.563	2285.32	2283.2	2275.39	2751.57
M178T393	178.057	393.031	L-Histidine	(M+Na)+	HMDB0000177	C00135	Organic acids and derivatives	Carboxylic acids and derivatives	"Amino acids, peptides, and analogues"	14068.6	38109.8	19038.2	7531.2	43460.2	43764.8	36769	16638.6	31896.1	34282.6	41616.7	28486.7	31484.3	32670.5	31355.7	34481.2	31474.1
M424T172	424.34	171.797	Linoleoylcarnitine	[M+H]+	HMDB0006469		Lipids and lipid-like molecules	Fatty Acyls	Fatty acid esters	143768	137094	79479.5	155812	133844	219924	160095	141974	111616	166145	120755	131060	114093	137532	150094	139230	137560
M188T550	188.138	549.873	L-Lysine	(M+CH3CN+H)+	HMDB0000182	C00047	Organic acids and derivatives	Carboxylic acids and derivatives	"Amino acids, peptides, and analogues"	2960.24	7239.44	6806.13	5142.44	28450	9408.89	6017.21	7296.57	7074.84	11084.2	7608.25	11773.1	16995.4	5122.41	5768.35	5871.81	1882.72
M173T243	173.127	242.877	L-Norleucine	(M+CH3CN+H)+	HMDB0001645	C01933	Organic acids and derivatives	Carboxylic acids and derivatives	"Amino acids, peptides, and analogues"	14882.6	42240.7	39556.2	25111.1	84934.3	27943.9	39250.3	23463	30156.6	37910.3	31049.5	35266.1	43531.1	25977	26254.4	26483	26799.9
M334T291	334.136	291.199	Lomefloxacin	[M+H-H2O]+	HMDB0015113	C07078	Organoheterocyclic compounds	Quinolines and derivatives	Quinoline carboxylic acids	6418.95	6502.08	7586.24	6096.24	7446.13	6352.79	5104.3	6388.41	9111.58	5920.44	5672.42	6022.86	5998.35	6669.15	7060.77	7059.37	6047.04
M400T173_2	400.34	173.077	L-palmitoylcarnitine	[M+H]+	HMDB0000222	C02990	Lipids and lipid-like molecules	Fatty Acyls	Fatty acid esters	328947	379416	182004	433553	239749	483400	416326	280033	289584	445507	355124	321317	294657	347210	353884	353864	352126
M496T291	496.337	291.289	Lpc 16:0	[M+H]+			Lipids and lipid-like molecules	Glycerophospholipids	Glycerophosphocholines	4684.7	5423.26	4011.53	4246.88	4908.8	3555.22	6728.37	5527.08	4871.88	6078.94	7478.72	4468.99	5750.46	4837.86	4257.62	4630.67	4828.22
M520T193_2	520.339	192.918	Lpc 18:2	[M+H]+			Lipids and lipid-like molecules	Glycerophospholipids	Glycerophosphocholines	6.84641e+06	7.29081e+06	6.84393e+06	7.12335e+06	7.93442e+06	7.55484e+06	7.32639e+06	6.83139e+06	7.12048e+06	7.75439e+06	7.89878e+06	7.50379e+06	8.05719e+06	7.3559e+06	7.35557e+06	7.35581e+06	7.49725e+06
M229T231_2	229.094	231.158	L-Phenylalanine	(M+CH3CN+Na)+	HMDB0000159	C00079	Organic acids and derivatives	Carboxylic acids and derivatives	"Amino acids, peptides, and analogues"	2599.27	1581.14	1668.01	1590.22	2604.93	1342.83	1273.41	1235.21	1470.11	1510.27	1137.19	1433.61	2407.38	1082.8	1844.83	1973.54	1970.27
M130T277	130.085	276.532	L-Pipecolic acid	(M+H)+	HMDB0000070/HMDB0000716	C00408	Organic acids and derivatives	Carboxylic acids and derivatives	"Amino acids, peptides, and analogues"	19437.8	16193.5	12764.7	10896.3	8845.6	14315.5	16944.2	17516.6	18310.2	12334.6	22128.8	17056.8	17979.4	18419.6	18401.6	18664.9	20719.6
M218T280	218.138	279.526	L-propionylcarnitine	[M+H]+	HMDB0062514		Lipids and lipid-like molecules	Fatty Acyls	Fatty acid esters	242077	170839	188597	176231	104173	137263	97539.7	187274	153592	145135	129864	132395	100625	205480	205465	205479	214217
M130T380	130.049	379.764	L-pyroglutamic acid	[M+H]+	HMDB0000267	C01879	Organic acids and derivatives	Carboxylic acids and derivatives	Amino acids, peptides, and analogues	1.05817e+06	941702	904218	1.00275e+06	930824	802223	851698	748731	780551	674374	869313	819522	729250	869850	854376	854386	857809
M175T400	175.07	400.292	L-thiocitrulline	[M+H-NH3]+			Organic acids and derivatives	Carboxylic acids and derivatives	Amino acids, peptides, and analogues	961.616	1377.32	1661.12	1735.45	1383.31	1646.56	2381.3	2970.07	1574.59	2282.46	1712.16	27746.9	1442.03	2178.96	2256.03	2412.27	2303.43
M246T236	246.122	236.041	L-Tryptophan	(M+CH3CN+H)+	HMDB0000929	C00078	Organoheterocyclic compounds	Indoles and derivatives	Indolyl carboxylic acids and derivatives	8250.77	21530.1	14953.9	17491.9	18277.5	14058.4	18434.6	11428.6	30844.9	23778.1	21073.8	23552.8	14073.4	14226	14227.8	14453	14684.9
M243T62	243.086	62.1915	Lumichrome	[M+H]+		C01727	Organoheterocyclic compounds	Pteridines and derivatives	Alloxazines and isoalloxazines	12736.9	11723	13669.7	12158.8	14839.1	3049.97	11211.5	13487.9	8509.6	5105.19	5605.52	8650.34	12604.3	10610.2	9081.02	10305.1	10605.6
M231T286	231.133	286.394	Lys-Trp-Lys	[M+2H]2+			Organic acids and derivatives	Carboxylic acids and derivatives	Amino acids, peptides, and analogues	2422.37	4360.62	2858.93	2866.73	2001.93	2493.44	3591.63	3102.3	2920.61	2760.37	3486.34	2710.23	2062.27	2570.39	2572.11	2694.07	2639.75
M248T392	248.111	392.275	Malonyl-l-carnitine	[M+H]+	HMDB0062592		Lipids and lipid-like molecules	Fatty Acyls	Fatty acid esters	14552.6	9994.24	6716.88	9592.19	6207.18	8402.57	9714.57	8176.25	8935.03	7914.88	16528.4	7801.5	7654.54	10284	9968.98	10099.9	10207.8
M221T245	221.093	244.848	Met-Ala	[M+H]+			Organic acids and derivatives	Carboxylic acids and derivatives	Amino acids, peptides, and analogues	3606.41	1734.67	1469.86	3033.73	1498.4	2300.96	2265.73	1913.68	1960.83	1615.26	2020.21	1840.06	4435.74	2294.6	2296.27	2599.24	2421.07
M185T371	185.054	370.834	Methomyl	[M+Na]+	HMDB0031804	C11196				7812.14	8560.93	9896.42	6934.09	4420.86	7517.8	7927.63	5832.91	7892.4	5825.76	7820.72	8832.58	6755.73	7407.24	7315.44	6987.19	6967.03
M339T34_3	339.288	33.504	Monoelaidin	[M+H-H2O]+			Lipids and lipid-like molecules	Glycerolipids	Monoradylglycerols	27080.2	28875	100939	28977.4	19454.6	19763.3	34733.6	19496.1	16474.2	17225.2	33840.5	24412.3	22171.4	22367.9	21949.2	21263.1	23062.2
M402T296_2	402.282	295.601	Myriocin	[M+H]+		C19914	Lipids and lipid-like molecules	Fatty Acyls	Fatty acids and conjugates	1260.58	827.434	627.379	1289.38	5236.67	2175.32	2285.45	1703.89	674.018	1555.13	812.008	519.708	2139.81	1060.51	1312.5	1313.54	1312.78
M143T372	143.116	372.126	N-(4-piperidinyl)acetamide	[M+H]+						3350.2	4225.17	6546.01	9763.59	2485.8	10460.3	4111.16	10424	9551.65	4435.14	6272.53	3178.93	4610.25	8825.2	8786.55	9727.59	8791.46
M282T292	282.118	292.211	N6-methyladenosine	(M+H)+	HMDB0004044		"Nucleosides, nucleotides, and analogues"	Purine nucleosides		13119.9	15812	11768.6	14317.3	12932	17308.2	18326.1	13593	13575.8	13466.6	14127.8	14389.2	13300.8	15429	15429.7	15431.6	15747
M143T292	143.116	292.204	N6-Methyl-L-lysine	(M+H-H2O)+	HMDB0002038	C02728	Organic acids and derivatives	Carboxylic acids and derivatives	"Amino acids, peptides, and analogues"	1385.31	1710.15	1626.94	1214.35	2002.97	3387.64	1430.22	2448.74	2254.35	1282.94	1507.73	1603.18	1290.58	2327.76	2293.73	2459.77	2292.81
M305T445	305.097	445.069	N-Acetylaspartylglutamate (NAAG)	(M+H)+	HMDB0001067	C12270	Organic acids and derivatives	Carboxylic acids and derivatives	"Amino acids, peptides, and analogues"	1729.74	2672.25	1674.23	2538.65	2379.23	1666.7	1320.66	1497.89	2078.56	1195.16	2242.08	1358.86	1312.46	1842.26	1657.93	1843.13	1796.95
M406T373	406.13	373.444	N-acetyl-d-lactosamine	[M+Na]+	HMDB0006583	C00611	Lipids and lipid-like molecules	Fatty Acyls	Fatty acyl glycosides	2144.95	4795.4	2179.6	5231.31	3974.56	2703.46	2421.69	4366.8	2575.16	5134.58	3751.5	1947.61	2705.57	5119.89	4795.61	5127.84	3935
M198T393	198.084	393.165	N-acetylhistidine	[M+H]+	HMDB0014748	C02997	Organic acids and derivatives	Carboxylic acids and derivatives	Amino acids, peptides, and analogues	119950	125828	122414	100348	180713	133327	147440	147574	146806	116578	137162	127871	121187	141098	141132	142113	145686
M171T266	171.111	265.795	N-alpha-acetyl-l-lysine	[M+H-H2O]+		C12989	Organic acids and derivatives	Carboxylic acids and derivatives	Amino acids, peptides, and analogues	11963.4	41752.7	32300.9	29327.5	74554.1	34272.4	36060.6	29756.4	50272.8	47178.5	32054.7	40967.9	52167.2	27316.7	27330.7	27864.9	28539.6
M157T295	157.096	294.636	N-.alpha.-acetyl-l-ornithine	[M+H-H2O]+	HMDB0003357	C00437	Organic acids and derivatives	Carboxylic acids and derivatives	Amino acids, peptides, and analogues	5842.17	14207.4	12751.1	14771.7	52505.8	19051.6	23028	18312.4	11586.5	23218.7	11971.7	15135.4	22396.3	12456.6	13697.9	14225.9	14184.1
M110T400	110.07	400.034	N-.alpha.-(tert-butoxycarbonyl)-l-histidine	[M+H-C6H10O4]+			Organic acids and derivatives	Carboxylic acids and derivatives	Amino acids, peptides, and analogues	251684	134384	161458	188791	204838	301938	314636	111929	161302	107413	340937	223272	224569	184453	261541	172464	200799
M315T291	315.086	290.812	Narirutin	[M+H-C10H18O8]+		C09793	Phenylpropanoids and polyketides	Flavonoids	Flavonoid glycosides	1222.52	5422.12	4275.87	3959.4	4866.89	3761.16	3245.31	4760.67	4433.17	4714.01	4336.48	3862.42	3511.37	3717.05	4286.47	4298.58	4293.61
M788T198	787.663	198.417	N-Docosanoyl-4-sphingenyl-1-O-phosphorylcholine	(M+H)+						41541.9	24589.3	55268.2	36710.5	40457.5	31724.3	19910.5	38947.8	20147.7	74244.8	22263.7	25593.8	40646.2	25523.5	24104.6	25549.2	15962.9
M535T416	535.305	416.209	Neriifolin	[M+H]+		C08876	Lipids and lipid-like molecules	Steroids and steroid derivatives	Steroid lactones	7368.29	466.581	2972.62	1355.31	3806.6	2578.37	1870.79	16550	1871.8	441.362	9846.12	1077.37	20219.8	4328.64	4252.16	4253.26	4556.88
M123T63	123.054	63.405	Niacinamide	[M+H]+	HMDB0001406	C00153	Organoheterocyclic compounds	Pyridines and derivatives	Pyridinecarboxylic acids and derivatives	371602	494099	366438	242217	633485	85511.2	420313	381127	203173	137003	434211	349275	365617	359649	361266	361272	350373
M139T155	139.049	154.937	Nicotinamide n-oxide	[M+H]+	HMDB0002730		Organoheterocyclic compounds	Pyridines and derivatives	Pyridinecarboxylic acids and derivatives	17280.2	36677	25487.1	20875.5	44979.7	15929.1	34795	37171	25057.7	20914.1	28538.4	22938.6	29725.7	22900.7	21214.9	23664.8	23357.3
M163T76	163.122	75.78	Nicotine	[M+H]+	HMDB0001934	C16150	Organoheterocyclic compounds	Pyridines and derivatives	Pyrrolidinylpyridines	13838.2	13570	23362.9	8684.58	18442.1	8659.81	70000.5	14531.7	6512.41	16747.8	8663.47	39335.2	11784.9	18442	18399.2	17813.5	18272.7
M648T184_1	647.507	183.734	N-lauroyl-d-erythro-sphingosylphosphorylcholine	[M+H]+	HMDB0012096		Lipids and lipid-like molecules	Sphingolipids	Phosphosphingolipids	6040.68	5240.57	2949.42	2590.17	4077.94	6299.44	6059.64	4055.76	3801.44	6811.42	5446.7	5183.31	5826.06	5553.83	5413.24	5675.32	5411.73
M204T439	204.096	438.916	N,n'-diacetylchitobiose	[M+H-C8H15NO6]+	HMDB0003556	C01674	Organic oxygen compounds	Organooxygen compounds	Carbohydrates and carbohydrate conjugates	19831.1	23409.5	30104.6	13816.6	19625	23052.3	21769.1	23044.6	25668.8	20672.4	22218.1	22829.1	22999.9	20790.1	14720.2	20767.1	20798.7
M814T199	813.68	198.712	N-nervonoyl-d-erythro-sphingosylphosphorylcholine	[M+H]+	HMDB0012107		Lipids and lipid-like molecules	Sphingolipids	Phosphosphingolipids	871459	658622	801917	537911	627586	479348	671876	683866	539051	895062	210258	600714	953293	636798	636858	641744	543345
M732T178_1	731.603	178.293	N-(octadecanoyl)sphing-4-enine-1-phosphocholine	[M+H]+	HMDB0001348	C00550	Lipids and lipid-like molecules	Sphingolipids	Phosphosphingolipids	1.82648e+06	866321	995267	1.25656e+06	972494	998928	863485	1.04534e+06	882205	1.98003e+06	1.20617e+06	951322	1.32545e+06	949116	901976	947391	779543
M730T178_1	729.586	177.637	N-oleoyl-d-erythro-sphingosylphosphorylcholine	[M+H]+	HMDB0012101		Lipids and lipid-like molecules	Sphingolipids	Phosphosphingolipids	379424	557990	374743	395749	296291	615309	377862	378795	389059	578776	577775	424566	376421	376717	364253	376894	375350
M326T35_2	326.303	35.46	N-oleoylethanolamine	[M+H]+	HMDB0002088	C20792	Organic nitrogen compounds	Organonitrogen compounds	Amines	6684.11	11699.2	9088.38	8401.1	9315.21	9277.63	10515.6	7640.18	9877.47	7817.5	12082.9	8251.78	8382.22	11162.3	10205.1	10214.1	10522.8
M177T414	177.086	413.815	N.omega.-hydroxy-nor-l-arginine	[M+H]+			Organic acids and derivatives	Carboxylic acids and derivatives	Amino acids, peptides, and analogues	218515	291130	83990.8	14345.6	450628	472392	398858	401380	357252	449272	416901	537802	457886	334992	432692	413344	431261
M597T108	597.444	107.675	Nonapropylene glycol monobutyl ether	[M+H]+			Organic oxygen compounds	Organooxygen compounds	Alcohols and polyols	6083.15	7115.11	11218.4	5213.47	4911.08	3210.02	6670.33	8228.21	3970.35	5303.37	2982.61	3605.99	3888.18	5194.45	5181.89	4939.39	3539.24
M539T34	538.516	34.26	N-Palmitoylsphingosine	(M+H)+						17985	12431.2	11390	12573.5	11382.8	13163.5	15296.6	13420.5	11414.5	12081.5	24996.8	15609.6	27254.7	15271	15292.7	15306.7	13987.5
M266T230	266.104	229.849	N-(phenylacetyl)-l-phenylalanine	[M+H-H2O]+	HMDB0002372		Organic acids and derivatives	Carboxylic acids and derivatives	Amino acids, peptides, and analogues	4820.96	1999.59	2474.62	5724.6	3886.59	6161.52	3706.27	4589.19	3655.37	5530.34	3824.01	5112.18	4393.83	4441.34	4403.91	3329.94	4116.97
M456T264	456.329	263.939	O-acetylsolasodine	[M+H]+			Lipids and lipid-like molecules	Steroids and steroid derivatives	Steroidal alkaloids	1711.84	2993.47	1472.05	2708.71	5641.03	3922.31	4611.47	3367.2	3682.67	2118.92	2112.59	2125.52	2548.84	2500.79	2231.67	2587.25	2590.31
M288T203	288.215	202.916	Octanoylcarnitine	[M+H]+	HMDB0000791		Lipids and lipid-like molecules	Fatty Acyls	Fatty acid esters	32710.7	18008.5	12073.7	29442.9	20252.4	29668.4	24572.1	24058.9	18903.5	16967.8	15651.3	16736.4	30257.2	30091.7	29291.9	30333.5	30330.3
M843T326	843.42	325.733	Okadaic acid	[M+K]+		C01945	Organic oxygen compounds	Organooxygen compounds	Ethers	708.439	3884.81	452.792	501.223	575.44	450.774	193.735	255.45	2206.93	1379.79	2016.61	1929.91	19.7495	965.414	826.413	900.713	867.183
M282T35_2	282.278	34.525	Oleamide	[M+H]+	HMDB0002117	C19670	Lipids and lipid-like molecules	Fatty Acyls	Fatty amides	72001.2	57068.4	71640.7	114072	66470	23041.6	69325.5	56831.4	61633.6	34542.6	113056	77472.7	56258.8	80466.1	86810.6	78056.3	77920.9
M573T442	573.332	441.984	Oleana-1,9(11)-dien-28-amide, 2-cyano-3,12-dioxo-n-(2,2,2-trifluoroethyl)-	[M+H]+			Benzenoids	Naphthalenes	Naphthalenecarboxylic acids and derivatives	5477.35	393.618	1624.01	426.083	1694.22	1162.03	1995.72	3589.73	560.626	523.823	6832.75	1934.1	17081.5	3254.49	3331.91	3376.85	3488.31
M426T170_2	426.356	170.193	Oleoyl-l-carnitine	[M+H]+	HMDB0005065		Lipids and lipid-like molecules	Fatty Acyls	Fatty acid esters	403957	389446	215676	446341	307159	588369	434185	389678	340350	460975	310615	320421	302387	370746	364102	366434	357674
M581T243	581.236	242.773	Olmesartan medoxomil	[M+Na]+			Benzenoids	Benzene and substituted derivatives	Biphenyls and derivatives	1230.45	1132.22	1034.77	1359.19	903.09	997.951	1388.62	1250.51	1633.93	450.443	1075.17	997.679	529.988	1614.46	1652.66	1613.43	1737.81
M156T29	156.04	28.5665	Oxindole	(M+Na)+						2449.03	1925.61	2598.71	2697.71	3060.39	1665.45	3315.65	2975.46	2678.75	762.194	2587.65	2958.82	2686.67	2634.99	2636.29	2667.4	2768.22
M358T136	358.226	136.003	Oxybutynin	[M+H]+	HMDB0015195	C07360				1785.94	917.561	3906.38	1004.63	1102.08	428.104	1794.35	574.376	181.048	1563.21	1759.66	872.988	395.336	3531.99	3706.47	2956.45	3792.02
M146T256	146.059	256.314	Oxyquinoline	(M+H)+						11511.2	18738.8	8096.2	14803.6	6086.85	11866.7	13513.2	8551.99	19826.8	8469.31	18480.1	15234.2	5778.81	16425.9	15945.3	15943.4	17691.9
M704T180_1	703.573	179.56	Palmitoyl sphingomyelin	[M+H]+	HMDB0061712		Lipids and lipid-like molecules	Sphingolipids	Phosphosphingolipids	6.79211e+06	6.31193e+06	5.98963e+06	6.3393e+06	7.15206e+06	9.70558e+06	6.51928e+06	5.94263e+06	6.24058e+06	1.04415e+07	6.78683e+06	7.17758e+06	6.77485e+06	8.32782e+06	8.35373e+06	8.34721e+06	6.39898e+06
M220T278	220.116	277.529	Pantothenic acid	[M+H]+	HMDB0000210	C00864	Organic acids and derivatives	Carboxylic acids and derivatives	Amino acids, peptides, and analogues	59478.9	55963.1	48127.3	52511.2	47170.5	54175.3	58122.3	64940.5	63860.6	49485.3	56255.5	42041.4	42928.5	57509.9	57510.1	57708.4	58282.6
M735T149	734.566	148.827	PC(16:0/16:0)	[M+H]+	HMDB0000564	C00157	Lipids and lipid-like molecules	Glycerophospholipids	Glycerophosphocholines	1.53556e+06	1.64045e+06	1.55432e+06	1.59647e+06	1.47574e+06	1.1475e+06	1.3754e+06	1.52774e+06	1.41303e+06	1.03129e+06	1.39814e+06	1.08602e+06	1.41327e+06	1.33045e+06	1.33126e+06	1.33364e+06	1.1407e+06
M891T157	890.539	157.401	PC(20:5(5Z,8Z,11Z,14Z,17Z)/20:5(5Z,8Z,11Z,14Z,17Z))	(M+CH3CN+Na)+						2309.49	4474.61	2898.79	3605.21	3159.8	4258.49	3477.86	2624.3	3975.54	5779.22	2612.09	5710.62	4766.41	2944.6	3350.78	1668.85	3313.96
M428T281	428.297	280.935	Peimisine	[M+H]+			Lipids and lipid-like molecules	Steroids and steroid derivatives	Steroidal alkaloids	1107.89	1466.79	833.429	1415.25	3176.07	1786.65	2914.5	1418.82	1062.15	909.33	891.821	1025.79	1612.68	1442.25	1364.93	1399.19	1383
M103T261	103.053	260.713	Phenylacetaldehyde	[M+H-H2O]+	HMDB0006236	C00601	Benzenoids	Benzene and substituted derivatives	Phenylacetaldehydes	20485	30575.2	19457.8	22244.7	30025.4	27082.4	27531.2	21912.3	24662.7	19043.8	27953.1	20025.4	24635	28740.2	28751.3	29348.5	29324.4
M265T255	265.114	255.107	Phenylacetyl-l-glutamine	[M+H]+	HMDB0006344	C04148	Organic acids and derivatives	Carboxylic acids and derivatives	Amino acids, peptides, and analogues	14115.6	20228.3	3700.79	13720.2	9793.33	8418.57	13779.6	13288.8	12995.8	10231.5	14638.3	8777.95	15158.9	12193.3	12199.9	9757.75	11812.2
M302T391	302.158	390.853	Phenylethyl 2-glucoside	[M+NH4]+			Organic oxygen compounds	Organooxygen compounds	Carbohydrates and carbohydrate conjugates	3218.48	2650.09	2596.66	3132.66	2571.04	2990.08	2430.16	3706.25	2153.98	3043.95	2164.82	2257.59	4234.51	3091.01	3091.23	3091.01	3194.63
M215T20	215.069	19.884	Phenyl salicylate	[M+H]+	HMDB0032018	C14163				1861.39	1789.62	2563.81	1715.18	1682.46	1755.46	2005.38	2077.07	1963.28	1458.74	1920.03	1788.96	2093.98	1932.47	1790.13	1791.34	1785.76
M212T443	212.042	442.583	Phosphocreatine	[M+H]+	HMDB0001511	C02305	Organic acids and derivatives	Carboxylic acids and derivatives	Amino acids, peptides, and analogues	11608.1	8051.4	4821.06	5040.04	6332.33	7662.47	8435.97	8895.07	5619.06	5569.73	11042.5	6973.2	5171.58	8693.64	8693.23	8816.61	8815.1
M544T341_1	543.978	341.495	Phosphoramidon	[M+H]+		C00563	Organic acids and derivatives	Carboxylic acids and derivatives	Amino acids, peptides, and analogues	16425.3	23900.8	20685.3	24632.1	18991.1	22315.4	21180	14724.8	21585.5	16100.5	22290.3	20140.7	14778.7	21576.3	21256.6	21260.1	21746.2
M184T186	184.072	186.278	Phosphorylcholine	(M+H)+	HMDB0001565	C00588	Organic nitrogen compounds	Organonitrogen compounds	Quaternary ammonium salts	67781.9	94042.5	116277	109112	92044	121512	99198.8	89768.4	86076.9	109437	88939.6	82818	87787.6	92139	96614.4	85739.6	95152.7
M301T157	301.139	156.794	Phthalic acid Mono-2-ethylhexyl Ester	(M+Na)+						7267.62	6737.14	5931.63	5890.1	6351.74	4716.47	6540.68	7021.04	6709.83	8642.03	6269.05	6496.92	6898.7	5827.97	5807.19	5682.76	5680.57
M376T34	376.257	34.139	Pipamperone	[M+H]+			Organic oxygen compounds	Organooxygen compounds	Carbonyl compounds	213539	177785	299507	138974	226265	146993	193476	194731	159670	149911	176558	218582	316586	225303	230827	227581	234010
M513T406	513.122	406.475	Pirinixic acid aminothiazole	[M+H]+						11231.4	25679.4	5180.48	2070.54	11662	19828.6	25548.1	23150.4	34903.2	21378.3	27033.8	26626.1	20594.2	18982.9	23907.2	23447.2	23905.7
M210T204	210.078	204.294	Porphobilinogen	[M+H-NH3]+	HMDB0000245	C00931	Organic nitrogen compounds	Organonitrogen compounds	Amines	17875.4	2354.53	13258.7	3556.47	28326.9	5508.29	2036.3	14059.4	3271.79	3846.65	4935.59	2861.19	4016.61	10251.7	10230.7	10231.6	10538.8
M245T416	245.111	415.838	Pro-Glu	[M+H]+			Organic acids and derivatives	Carboxylic acids and derivatives	Amino acids, peptides, and analogues	2139.72	2687.07	2194.21	2227.09	1696.49	1752.55	1721.41	1974.22	2170.59	1885.45	2720.73	1733.97	1388.85	1803.06	2870.21	2881.98	2891.35
M229T424	229.117	424.454	Pro-hyp	[M+H]+	HMDB0006695		Organic acids and derivatives	Carboxylic acids and derivatives	Amino acids, peptides, and analogues	23483.1	57093.7	25216.3	39221.9	23196.5	29083.2	30668.9	36281.7	27485.6	27365.7	53601	32703.2	43481	41203.2	35183.5	35560.7	35233.5
M263T389	263.122	389.235	Pro-phe	[M+H]+			Organic acids and derivatives	Carboxylic acids and derivatives	Amino acids, peptides, and analogues	5479.76	5450.45	3558.96	5598.27	3313.47	4167.07	3857.23	6068.37	2949.3	4675.34	6998.89	4239.3	4253.94	6802.89	5890.25	6814.17	6525.56
M117T330	117.065	329.538	Propylenethiourea	[M+H]+			Organoheterocyclic compounds	Azolidines	Imidazolidines	2433.41	2576.82	3288.95	1832.33	14548.4	3980.72	3257.03	3513.58	4052.21	6875.55	2754.58	4870.91	6045.41	2369.3	3069.89	3274.78	3264.86
M217T368	217.128	367.886	Pro-thr	[M+H]+			Organic acids and derivatives	Carboxylic acids and derivatives	Amino acids, peptides, and analogues	3837.51	5555.83	6799.83	6016.17	11117.9	5134.29	6722.61	5932.21	7717.98	5433.72	5156.2	6008.26	5600.87	5571.92	5457.28	5625.5	5606.98
M302T123	302.304	123.081	Pro-Trp	[M+H]+	HMDB0000269	C00836	Organic nitrogen compounds	Organonitrogen compounds	Amines	41775.8	31501.9	22235.6	29229.5	23361.8	14744.5	26874.8	36359.9	43182.9	17821.1	35286.4	24986.6	38711.9	34536.6	34545.9	34147.4	33034.4
M112T239	112.049	238.953	Pyrrole-2-carboxylic acid	[M+H]+	HMDB0004230	C05942	Organoheterocyclic compounds	Pyrroles	Pyrrole carboxylic acids and derivatives	30340.5	28524.1	17016.7	25042.3	22225.3	24116.2	24831.8	20679.7	21211.9	16101.1	30500.7	24377.2	19288.3	27954.4	28216.8	27258.9	28812.7
M141T322	141.064	322.45	(-)-quebrachitol	[M+H-3H2O]+	HMDB0034221	C08257	Organic oxygen compounds	Organooxygen compounds	Alcohols and polyols	4215.63	3701.8	3324.83	8580.34	4098.19	5007.59	3535.67	5369.37	6620.07	3518.21	4541.93	2881.35	4394.8	4368.16	4379.66	4204.28	3704.54
M146T86	146.059	85.711	Quinolin-2-ol	[M+H]+		C06415	Organoheterocyclic compounds	Quinolines and derivatives	Quinolones and derivatives	15588.4	48266.4	23082	24464.1	15635.1	10108.5	39078.8	29019.3	32837	15749.3	19479	41160.4	17221.7	31440.4	32656.4	33521.6	28081.3
M385T33_1	385.243	32.849	Resibufogenin	[M+H]+		C17058	Lipids and lipid-like molecules	Steroids and steroid derivatives	Steroid lactones	56479.8	28306.2	5992.73	31205.7	1083.64	19780.1	14821.3	24755.8	13188.1	2323.31	37378.8	10332.4	35512.6	42185.3	42539.4	42998.6	42367.1
M377T213	377.143	212.783	Riboflavin	(M+H)+	HMDB0000244	C00255	Organoheterocyclic compounds	Pteridines and derivatives	Alloxazines and isoalloxazines	857.767	1389.35	986.754	956.919	6805.29	761.266	870.256	1289.39	1134.69	798.894	1041.8	978.525	921.417	1359.15	1359.81	1410.52	1431.33
M383T387	383.067	386.55	Rosmarinic acid	[M+Na]+	HMDB0124941	C01850	Phenylpropanoids and polyketides	Cinnamic acids and derivatives	Hydroxycinnamic acids and derivatives	4334.08	3032.48	2569.95	3669.85	3714.04	3530.08	4518.63	3458.71	4053.63	4631.49	3632.1	3906.19	2984.41	3951.23	4004.12	3904.47	3976.32
M517T296	517.169	296.093	Rottlerin	[M+H]+		C10721	Phenylpropanoids and polyketides	Diarylheptanoids	Linear diarylheptanoids	7005.79	8838.19	7706.1	8318.95	6834.56	7464.09	7703.29	7478.99	7859.61	6096.5	7657.37	7930.4	6881.38	7609.59	7346.08	7469.97	7214.4
M619T252	619.282	251.555	Salannin	[M+Na]+		C08780	Lipids and lipid-like molecules	Prenol lipids	Triterpenoids	1580.48	2687.18	1263.04	1415.92	2531.64	2157.33	2014.21	1608.61	1699.18	1468.56	2440.8	1843.12	1413.09	2028.25	1999.51	1858.81	2028.56
M386T377	386.122	377.318	Sarafloxacin	[M+H]+	HMDB0039526		Organoheterocyclic compounds	Quinolines and derivatives	Phenylquinolines	38562	14325.5	41422.8	44290.4	11872.7	33821.8	11465.7	51518	9209.44	9094.14	40632.4	17887.3	14080.4	24903.6	19251.8	21100.9	18682.4
M131T439	131.08	438.78	Sarcosine	(M+CH3CN+H)+	HMDB0000271	C00213	Organic acids and derivatives	Carboxylic acids and derivatives	"Amino acids, peptides, and analogues"	27436.5	21683.7	27262.2	5991.24	17346.3	15778.5	17794.2	15278.3	16553.8	17469.1	15202.2	18788.5	20409.9	16914.6	17698.1	17280.2	18092.3
M455T34_1	455.186	34.216	Schizandrin	[M+Na]+		C17064	Phenylpropanoids and polyketides	Tannins	Hydrolyzable tannins	31227.5	3397.58	24040.1	5533.66	9785.83	154566	79229.5	92793.4	70984.6	142633	59791.6	25448.8	26634.2	55368.1	55402.9	56877.6	56838.5
M160T228	160.074	227.828	Serotonin	[M+H-NH3]+	HMDB0000259	C00780	Organoheterocyclic compounds	Indoles and derivatives	Tryptamines and derivatives	6007.51	13291	8006.87	18054.1	5474.23	3877.56	11021.8	6356.46	15313.7	2234.75	8543.64	7720.02	991.921	11203	11013.6	11692.7	12469.2
M207T231	207.111	230.973	Ser-Thr	[M+H]+			Organic acids and derivatives	Carboxylic acids and derivatives	Amino acids, peptides, and analogues	13875	34089.3	25702.8	24318.4	52640.3	27718.4	28654	19367.5	29272.1	28380.4	25800.4	29324.9	28744.5	25063.7	25071.5	26058.2	25668.8
M298T97	298.095	96.877	S-Methyl-5'-thioadenosine	(M+H)+	HMDB0001173	C00170	"Nucleosides, nucleotides, and analogues"	5'-deoxyribonucleosides	5'-deoxy-5'-thionucleosides	67356.8	45929.6	54590.7	59248.2	46946.9	32568.3	52445.3	64207	48116.7	27704.5	42435.3	45027.9	50836.3	56175.2	56245.7	56184.2	58862.5
M795T39	794.6	38.624	Sphingomyelin (d18:1/18:0)	(M+CH3CN+Na)+	HMDB0001348/HMDB0010168/HMDB0010169/HMDB0011698/HMDB0011699/HMDB0012084/HMDB0012085/HMDB0012087/HMDB0012088/HMDB0012089/HMDB0012090/HMDB0012091/HMDB0012092/HMDB0012093/HMDB0012094/HMDB0012095/HMDB0012096/HMDB0012100/HMDB0012101/HMDB0012102/HMDB0012103/HMDB0012104/HMDB0012105/HMDB0012107/HMDB0013461/HMDB0013462/HMDB0013463/HMDB0013464/HMDB0013465/HMDB0013466/HMDB0013467/HMDB0013468/HMDB0013469	C00550	Lipids and lipid-like molecules	Sphingolipids	Phosphosphingolipids	67298.8	102861	100682	103371	96885.8	169847	99134.5	92792.6	107552	86864	79259.3	78921.1	95245.3	95705.8	97053.4	98388.4	99146.1
M300T84	300.288	83.525	Sphingosine	[M+H]+	HMDB0000252	C00319	Organic nitrogen compounds	Organonitrogen compounds	Amines	48655.5	37555	27400.2	31352	26839	15894.8	27497.6	33635	45062.3	15655.2	37113	26528.2	32734.2	40008	39399.2	40009.5	39441.9
M329T32	329.213	31.766	Spiculisporic acid	[M+H]+			Organic acids and derivatives	Carboxylic acids and derivatives	Tricarboxylic acids and derivatives	264338	178690	213863	234051	213456	155889	243812	267979	217794	200799	263459	244906	236513	282566	286436	268695	286360
M102T435	102.054	434.548	Stachydrine	[M+H-C3H6]+	HMDB0004827	C10172	Organic acids and derivatives	Carboxylic acids and derivatives	Amino acids, peptides, and analogues	98284	116890	49146.6	17022.8	60710.2	56364.8	34462.8	31537.1	67623.1	52330.1	43207.1	80766.3	69524.3	49028.6	57145.5	61215.4	61228.2
M301T56	301.214	55.9545	Steviol	[M+H-H2O]+	HMDB0036706	C20212	Lipids and lipid-like molecules	Prenol lipids	Diterpenoids	31030.2	33846.7	60966.4	14374.5	6652.73	1822.49	11446.2	7134.62	6687.91	3618.62	3627.27	7535.89	10934.5	19501.8	19466.3	19444.9	13209.6
M365T365	365.103	365.239	Sucrose	[M+Na]+	HMDB0000258	C00089	Organic oxygen compounds	Organooxygen compounds	Carbohydrates and carbohydrate conjugates	2043.49	1608.79	1908.04	1350.91	1278.38	6018.21	2092.58	3904.49	1533.32	861.103	2778	1252.08	766.919	2688.93	2686.15	3141.53	2691.72
M677T387	677.065	387.29	Sulprophos sulfoxide	[2M+H]+			Benzenoids	Benzene and substituted derivatives	Phenyl sulfoxides	12068.6	11290.9	13339.7	8211.53	9871.48	12931.5	11340.5	11473.4	12543.3	11999.5	11130.3	13301.6	11661.6	12982.7	12786.9	12538.7	12639.1
M372T131	372.241	131.052	Tamoxifen	[M+H]+	HMDB0014813	C07108	Phenylpropanoids and polyketides	Stilbenes		2881.38	1699.61	5117.98	1346.64	1963.14	263.714	1867.36	596.967	431.67	2255.98	4417.16	2161.2	581.234	3805.82	3856.76	3812.91	4165.35
M500T163	500.3	162.557	Taurodeoxycholic acid	(M+H)+	HMDB0000896	C05463	Lipids and lipid-like molecules	Steroids and steroid derivatives	"Bile acids, alcohols and derivatives"	2345.62	10018.2	17769.8	2914.61	14287.1	11912.9	2278.09	6689.91	2664.35	2560.85	2140.91	1418.84	6114.84	6155.96	6203.31	6203.12	6012.69
M498T57	498.285	57.09	Taurohyocholic acid	[M-H2O+H]+			Lipids and lipid-like molecules	Steroids and steroid derivatives	Bile acids, alcohols and derivatives	58534	51406.3	64889	52669.1	51195.4	23694.6	65693.5	57794.2	71334	54641.4	55635.9	51565	71613	39695.4	42710.1	42703.2	42709.3
M299T68	299.139	68.1015	Tetrahydrofolate	[M+H-C6H5N5]+	HMDB0001846	C00101	Organic acids and derivatives	Carboxylic acids and derivatives	Amino acids, peptides, and analogues	11488.5	3495.03	16247.9	8683.17	11345.6	3800.77	12244.6	11680.5	6719.35	5115.72	7198.88	9391.09	2232.8	17775.7	17825.2	17763.9	19377.7
M265T376	265.113	376.383	Thiamine	[M]+	HMDB0000235	C00378	Organoheterocyclic compounds	Diazines	Pyrimidines and pyrimidine derivatives	37125.2	14943.5	31806	33805.2	32110.5	20332.9	23558.6	17452.3	23963	17932.5	42211.2	20545.3	21335.5	22863.1	22639.2	22635.8	23251
M134T233	134.026	233.114	Thiazolidine-4-carboxylic acid	[M+H]+		C07732	Organic acids and derivatives	Carboxylic acids and derivatives	Amino acids, peptides, and analogues	5670.91	4234.86	5441.34	5319.64	4270.06	4589.19	6440.29	4644.84	5397.69	4886.23	5776.14	2704.3	5170.96	4368.14	5503.94	5352.64	5520.13
M759T116	758.569	115.963	Thioetheramide-PC	(M+Na)+						5.61882e+06	3.40794e+06	4.91362e+06	4.7871e+06	2.23474e+06	9.54278e+06	7.08773e+06	3.43025e+06	4.16752e+06	3.85996e+06	9.45825e+06	7.56899e+06	3.40908e+06	6.5189e+06	4.59447e+06	4.31233e+06	4.20971e+06
M362T443	362.2	443.224	Thr-Asn-Lys	[M+H]+			Organic acids and derivatives	Carboxylic acids and derivatives	Amino acids, peptides, and analogues	3056.97	1206.69	1961.5	1454.84	1663.24	1122.63	1214.57	2383.16	960.346	906.549	1899.35	1211.23	5052.74	2291.19	2245.84	2246.11	2284.12
M243T27	243.101	26.886	Thymidine	(M+H)+	HMDB0000273	C00214	"Nucleosides, nucleotides, and analogues"	Pyrimidine nucleosides	Pyrimidine 2'-deoxyribonucleosides	1220.06	1160.03	843.128	1709.93	1533.98	5023.4	1775.98	948.065	1421.64	5987.99	1112.67	816.578	2184.05	1124.78	1130.21	1142.29	1128.51
M149T261	149.058	260.758	trans-cinnamate	(M+H)+		C00423				6640.63	10182	5784.65	6966.55	10081.2	9084.21	8485.09	6247	6404.66	6920.34	8571.04	4640.17	6427.1	9142.67	8907.79	8908.66	9592.56
M327T240	327	239.675	Tri(3-chloropropyl) phosphate	[M+H]+			Organic acids and derivatives	Organic phosphoric acids and derivatives	Phosphate esters	5086.49	4993.95	3928.06	4360.42	4852.12	3041.71	2628.79	1375.35	9532.35	5106.08	5918.73	5082.86	3078.22	4366.71	3945.79	4216.63	4405.78
M138T290	138.053	289.836	Trigonelline	[M+H]+	HMDB0000875	C01004	Alkaloids and derivatives			52957.4	62065.2	75038.4	72016.7	90385.8	70661.1	73056.4	67804.8	37412.1	51713.1	101875	32628	82266.6	59373.9	60423.7	61487.9	61583.2
M385T171	385.343	171.206	Trihydroxycoprostane	[M+H-2H2O]+	HMDB0001457	C05454	Lipids and lipid-like molecules	Steroids and steroid derivatives	Cholestane steroids	1977.69	2425.16	2189.77	2263.42	1122.56	528.249	682.322	2926.24	1811.39	963.806	752.899	569.59	2518.07	2471.16	2477.83	2475.01	1222.12
M76T331	76.075	331.456	Trimethylamine n-oxide	[M+H]+	HMDB0000925	C01104	Organic nitrogen compounds	Organonitrogen compounds	Aminoxides	20372.1	16019.9	34158.9	6998.34	44670.8	35801.6	37104.6	32577.1	21080.2	99216.7	28314.4	25278.1	66643.2	32256.8	36557.3	36507	38357.2
M457T291	457.158	291.096	Trioxsalen	[2M+H]+	HMDB0015575	C09314	Phenylpropanoids and polyketides	Coumarins and derivatives	Furanocoumarins	4093.84	4774.16	6033.18	3083.2	5272.51	4182.88	3903.84	4475.84	4561.63	5774.55	4225.61	4297.28	4855.21	5262.4	4444.06	4449.94	4665.62
M295T208_2	295.164	207.506	Tyr-Leu	[M+H]+			Organic acids and derivatives	Carboxylic acids and derivatives	Amino acids, peptides, and analogues	5066.86	2432.56	1614.66	2285.52	2160.84	2761.11	1799.94	5075.59	1542.16	1634.6	5031.32	3354.3	6914.02	3447.92	3515.09	3448.38	3646.14
M61T101	61.0388	100.982	Urea	[M+H]+	HMDB0000294	C00086	Organic acids and derivatives	Organic carbonic acids and derivatives	Ureas	21687.8	25457.5	24961.3	24740.9	25149.9	18202.4	23775	25961.4	24934.4	19963.6	20555.4	23033.1	21749.1	22392.7	23420	22789.9	22537.5
M355T228	355.261	227.951	Ursocholic acid	[M+H-3H2O]+	HMDB0000917	C17644	Lipids and lipid-like molecules	Steroids and steroid derivatives	Bile acids, alcohols and derivatives	1146.33	356.846	12058.7	873.595	32904.6	668.808	419.655	2977.6	2481.23	455.205	361.194	4959.16	423.704	3767.21	3587.64	3876.5	3876.73
M159T267	159.111	267.015	Val-Ala-Lys	[M+2H]2+			Organic acids and derivatives	Carboxylic acids and derivatives	Amino acids, peptides, and analogues	3875.15	13667.8	11206.5	8809.45	22959.9	8261.49	11650.4	7819.87	12746.8	10560.7	8243.8	12157.1	12072.2	8703.34	8830.3	8343.74	8858.08
M556T410	556.305	409.907	Valinomycin	[M+2H]2+		C06684	Organic acids and derivatives	Peptidomimetics	Depsipeptides	15561.1	723.17	2138.51	1539.37	5539.81	7193.36	2922.19	10379.4	1089.42	719.225	17924.4	4527.9	15831.3	6283.15	6647.44	6413.5	6293.73
M203T36	203.06	36.314	Vasicinone	[M+H]+		C10744	Organoheterocyclic compounds	Diazanaphthalenes	Benzodiazines	4105.73	2312.13	2993.97	3239.77	2246.2	2640.65	1733.18	2279.12	2270.36	1277.09	1592.58	2432.5	1433.17	2302.25	2270.14	2429.31	2345.04
M557T108	557.452	108.078	Vecuronium	[M]+	HMDB0015432	C07553	Lipids and lipid-like molecules	Steroids and steroid derivatives	Steroid esters	10864.9	27348.6	14149.4	11671.5	12770.6	7675.03	13582.5	23252.7	12704	5587.2	7537.85	6867.22	10660.4	12612.4	12708.3	12681	20452.4
M153T87	153.064	86.53	Xanthosine	[M+H-C5H8O4]+	HMDB0000299	C01762	"Nucleosides, nucleotides, and analogues"	Purine nucleosides		40072.4	136187	50373.2	52042	67928.3	62796.1	59742.4	64774.3	53276.8	81018.5	50294.2	108613	133539	100163	105468	70795.5	105209
M576T203_1	576.233	202.974	Zafirlukast	[M+H]+	HMDB0014689	C07206	Benzenoids	Benzene and substituted derivatives	Benzenesulfonamides	578.839	3632.38	2947.91	1428.01	3007.55	4076.75	1575.2	1358.18	661.533	1857.06	1566.93	1797.35	2731.73	1495.46	1524.94	1422.17	1523.97
M119T35_2	119.084	34.753	Zerumbone	[M+H-C6H12O]+		C20262	Lipids and lipid-like molecules	Prenol lipids	Sesquiterpenoids	13852.1	17328	13766.1	19885.7	16826.3	13867.1	8753.71	15811	11939.7	5941.3	14086.8	27399.7	15101.2	31515.8	29441.4	30916.6	32680.4
M387T37	387.179	36.704								3.24898e+06	1.67266e+06	2.3214e+06	2.95513e+06	1.76136e+06	1.6128e+06	1.60852e+06	1.80278e+06	2.24249e+06	1.79233e+06	2.86395e+06	2.77819e+06	2.68242e+06	2.54934e+06	2.55427e+06	2.75003e+06	2.61084e+06
M759T40	758.569	39.861								1.24466e+07	1.56487e+07	1.09346e+07	1.41332e+07	1.53692e+07	2.1949e+07	1.60533e+07	1.12386e+07	1.46625e+07	1.34781e+07	1.92626e+07	1.45961e+07	1.3713e+07	1.52688e+07	1.52521e+07	1.54255e+07	1.56621e+07
M807T140_1	806.569	140.31								8.48225e+06	8.97541e+06	9.33409e+06	8.48359e+06	9.11025e+06	8.54814e+06	8.36329e+06	7.9169e+06	8.23786e+06	6.6978e+06	9.2288e+06	7.47737e+06	7.51391e+06	9.34021e+06	9.26113e+06	9.3401e+06	9.34e+06
M532T32_2	532.438	31.754								4.31273e+06	2.70086e+06	3.75156e+06	3.22068e+06	3.52171e+06	3.37679e+06	3.23157e+06	3.96788e+06	4.49235e+06	4.58338e+06	3.52831e+06	3.49788e+06	4.03622e+06	3.86724e+06	3.72778e+06	3.87739e+06	3.73119e+06
M759T56	758.569	55.9835								6.69457e+06	9.31289e+06	6.9269e+06	9.00183e+06	9.74902e+06	9.86756e+06	1.00719e+07	6.16382e+06	1.09206e+07	1.82418e+07	1.48474e+07	1.03866e+07	9.06488e+06	9.04888e+06	1.04377e+07	1.02648e+07	1.043e+07
M992T194	991.67	194.14								3.41335e+06	4.07664e+06	3.40277e+06	4.05257e+06	3.33536e+06	3.9331e+06	4.00538e+06	3.55332e+06	3.6156e+06	3.51275e+06	4.26833e+06	3.47514e+06	3.11315e+06	4.02343e+06	3.92957e+06	3.91168e+06	3.94712e+06
M783T39_1	782.568	38.634								4.13263e+06	6.14418e+06	5.36627e+06	5.46493e+06	6.53357e+06	8.98851e+06	6.29855e+06	5.0004e+06	6.06644e+06	7.23338e+06	5.84769e+06	4.58587e+06	5.52023e+06	5.27866e+06	5.15286e+06	5.30111e+06	5.30094e+06
M522T191_2	522.353	191.095								4.23174e+06	4.52417e+06	4.09671e+06	4.52494e+06	4.37064e+06	5.10963e+06	4.78708e+06	4.11099e+06	4.8768e+06	4.33104e+06	4.55706e+06	4.2841e+06	5.0022e+06	4.29864e+06	4.2983e+06	4.29842e+06	4.51333e+06
M235T430_1	235.093	429.874								4.54282e+06	6.15888e+06	3.91821e+06	578907	5.13822e+06	7.23954e+06	6.62068e+06	5.86423e+06	6.26985e+06	7.55326e+06	5.71566e+06	8.20378e+06	5.53101e+06	7.73288e+06	7.75348e+06	9.41189e+06	7.73624e+06
M387T33_1	387.252	32.827								252840	4179.68	107708	2505	1847.11	3337.59	2678.45	118362	5049.58	3287.9	4520.15	4509.21	2906.52	96165.2	203444	117960	7667.58
M835T39	834.598	38.612								1.16013e+06	1.53886e+06	1.31578e+06	1.50803e+06	1.38783e+06	2.77488e+06	1.61444e+06	1.40456e+06	1.60174e+06	1.99184e+06	1.4165e+06	1.44534e+06	1.55934e+06	1.61766e+06	1.59418e+06	1.59809e+06	1.61741e+06
M338T34_1	338.275	33.9735								208096	6538.98	3523.98	6462.72	5032.5	406464	6483.8	1764.56	1.05054e+06	4121.56	6105.09	1.5645e+06	1.30188e+06	12809.7	1.70021e+06	1.70244e+06	1.70517e+06
M331T448	331.045	448.094								4.21339e+06	4.24496e+06	4.41929e+06	5.38005e+06	4.15064e+06	3.99705e+06	3.97669e+06	3.74612e+06	4.18981e+06	3.84792e+06	4.14395e+06	3.96196e+06	3.51322e+06	3.83732e+06	3.72423e+06	3.83725e+06	3.80974e+06
M568T188_2	568.338	188.048								2.40719e+06	3.35975e+06	3.43871e+06	2.84716e+06	3.71203e+06	3.84675e+06	3.12123e+06	2.72688e+06	3.41017e+06	3.30327e+06	3.02014e+06	2.74752e+06	2.28261e+06	3.31955e+06	3.27184e+06	3.34355e+06	3.35863e+06
M269T341_1	268.999	340.869								9.57125e+06	1.17866e+07	9.92359e+06	1.1556e+07	1.06987e+07	1.18357e+07	1.10159e+07	8.90678e+06	1.11251e+07	9.5639e+06	1.09042e+07	1.07498e+07	8.69644e+06	1.08399e+07	1.07727e+07	1.07741e+07	1.09619e+07
M217T35	217.107	35.3675								744547	494448	528105	541419	592284	1.01541e+06	1.14526e+06	910029	896217	804284	753878	522040	642674	523159	526585	520209	539986
M293T420	293.099	419.765								2.67069e+06	1.85672e+06	3.3552e+06	2.86399e+06	1.58063e+06	1.68333e+06	1.67505e+06	1.64824e+06	1.79903e+06	1.51566e+06	2.06076e+06	1.76306e+06	1.55378e+06	1.82527e+06	1.97171e+06	1.80354e+06	1.70145e+06
M315T420	315.069	419.661								2.8164e+06	2.52407e+06	2.82855e+06	3.52567e+06	2.26799e+06	2.40728e+06	2.4508e+06	2.35234e+06	2.51806e+06	2.1625e+06	2.45479e+06	2.51275e+06	2.26914e+06	2.51084e+06	2.57764e+06	2.48742e+06	2.48711e+06
M812T39_2	811.601	38.628								1.38632e+06	1.82098e+06	1.6299e+06	1.78828e+06	1.71393e+06	2.52656e+06	1.90754e+06	1.56551e+06	1.90231e+06	2.49344e+06	1.66642e+06	1.69759e+06	1.93986e+06	1.68764e+06	1.64326e+06	1.68759e+06	1.68506e+06
M1048T190	1047.73	190.483								1.03906e+06	992217	885132	1.03747e+06	603599	822721	968406	853041	1.22652e+06	1.22483e+06	1.26838e+06	1.17823e+06	1.00906e+06	1.17832e+06	1.05308e+06	1.05287e+06	1.05339e+06
M663T32_2	663.451	31.504								1.16815e+06	577320	549112	693225	873673	636594	426909	564935	662329	733882	681123	835673	885131	1.10136e+06	1.12508e+06	1.05867e+06	1.16861e+06
M1016T194	1015.67	193.529								1.22186e+06	1.56904e+06	1.0845e+06	1.39762e+06	1.35104e+06	1.50914e+06	1.41218e+06	1.11281e+06	1.45557e+06	1.29958e+06	1.63295e+06	1.46389e+06	1.19702e+06	1.44267e+06	1.41007e+06	1.46129e+06	1.46108e+06
M404T37	404.206	36.691								542164	304653	369970	370275	316707	368930	329723	360590	417914	430073	422052	467830	433610	431084	454461	452867	454509
M450T35	450.232	34.681								226132	21098.4	153251	7847.12	66872	527513	623848	739666	606375	455506	515318	177797	180736	420879	465036	453626	465500
M759T86	758.569	86.3695								4.09249e+06	3.62116e+06	3.70106e+06	5.86393e+06	2.00055e+06	8.06343e+06	3.55209e+06	5.07256e+06	7.72512e+06	4.6185e+06	6.84389e+06	6.25772e+06	2.44763e+06	3.62683e+06	6.12402e+06	6.12819e+06	5.82024e+06
M809T140_1	808.58	139.769								2.67438e+06	2.85588e+06	2.75591e+06	2.62955e+06	2.90444e+06	2.59301e+06	3.07885e+06	2.51207e+06	2.71015e+06	2.43641e+06	2.86874e+06	3.2415e+06	2.71099e+06	2.87107e+06	2.87107e+06	2.87099e+06	3.07663e+06
M245T34	245.138	34.149								426106	225814	263533	224176	264613	561894	747861	574834	572641	411218	370754	305454	293532	306556	306627	306602	320687
M783T60	782.566	60.006								1.64155e+06	819744	1.22961e+06	383802	2.03499e+06	4.75261e+06	3.59541e+06	798167	1.0118e+06	3.07693e+06	802160	1.73394e+06	1.84606e+06	2.09184e+06	2.09249e+06	1.10524e+06	2.08861e+06
M787T57	786.599	57.083								4.22187e+06	3.7788e+06	4.13628e+06	4.97685e+06	4.10801e+06	2.99266e+06	4.27192e+06	3.813e+06	5.24129e+06	4.97857e+06	6.5677e+06	4.2259e+06	5.06814e+06	5.35256e+06	5.21847e+06	4.69339e+06	5.35856e+06
M812T175_1	811.666	174.567								2.11785e+06	2.13671e+06	1.90212e+06	1.68265e+06	1.50802e+06	2.16168e+06	1.56671e+06	1.49656e+06	1.62754e+06	2.35395e+06	2.2113e+06	1.64234e+06	1.65991e+06	1.70579e+06	1.7107e+06	1.67371e+06	1.37523e+06
M432T36	432.237	36.145								613451	436134	476438	465236	483979	306845	415573	461800	467536	327180	512933	557219	570781	531277	565757	555623	565542
M485T34	485.287	34.137								7032.78	4369.98	3833.09	4895.59	4805.67	3469.11	3983.96	3970.95	4267.99	4812.5	6277.93	5052.29	5999.55	595033	595041	601176	623693
M788T40	787.601	39.857								2.22764e+06	2.5543e+06	1.79483e+06	2.4343e+06	2.09403e+06	2.93804e+06	2.54201e+06	1.90319e+06	2.43066e+06	2.82065e+06	3.02402e+06	2.86042e+06	2.63475e+06	2.56139e+06	2.53678e+06	2.54478e+06	2.57825e+06
M235T407	235.093	407.429								4.0645e+06	4.07248e+06	3.91731e+06	1.468e+06	3.75721e+06	2.5212e+06	4.202e+06	2.75573e+06	4.37666e+06	2.05043e+06	3.43318e+06	2.92067e+06	2.38174e+06	3.42325e+06	3.26846e+06	3.25988e+06	4.41089e+06
M312T124	312.36	124.222								58880.9	469.572	2541.43	2186.46	409.39	463.602	112.441	13668.6	246.664	1457.33	1.52494e+06	804.331	25913	43351.4	40767	42646.3	43372.2
M515T341	515.006	340.869								3.25151e+06	4.18178e+06	3.37352e+06	4.217e+06	3.58286e+06	4.25406e+06	4.05523e+06	2.89095e+06	3.9798e+06	3.15539e+06	3.79865e+06	3.71476e+06	2.78481e+06	3.89304e+06	3.7589e+06	3.86305e+06	3.89327e+06
M160T453_2	160.059	453.031								1.21081e+06	1.36295e+06	1.15681e+06	456541	967703	1.43392e+06	1.336e+06	992511	1.54959e+06	1.23366e+06	1.33056e+06	1.49766e+06	1.13212e+06	1.48121e+06	1.48133e+06	1.54107e+06	1.49507e+06
M415T35_1	415.21	35.464								107339	227752	111765	179604	120943	142659	163917	172505	119606	97548	123518	378065	93770.6	610776	610767	615385	633523
M187T341_1	186.995	340.868								4.45082e+06	5.19963e+06	4.61545e+06	5.42076e+06	4.81073e+06	5.35879e+06	5.21585e+06	4.21118e+06	5.22145e+06	4.55284e+06	4.9363e+06	4.98279e+06	4.14461e+06	4.99759e+06	4.93893e+06	5.03066e+06	5.03035e+06
M315T458	315.079	457.649								4.70163e+06	5.70002e+06	4.10896e+06	2.12603e+06	4.85512e+06	3.90878e+06	5.69706e+06	6.03937e+06	5.5253e+06	6.37667e+06	4.06608e+06	6.42945e+06	5.63245e+06	5.65679e+06	4.2902e+06	5.3586e+06	5.64398e+06
M102T38	102.127	37.6635								427272	302363	321459	420585	508307	508225	568306	394556	455877	704220	307450	436253	513487	379559	299281	395221	395467
M160T373	160.095	372.736								141837	196887	699.551	1467.2	69665.2	85571.8	1686.25	183636	2127.64	1708.69	127005	2451.04	717.75	117503	104590	2744.1	118691
M433T341	433.003	340.869								2.90851e+06	3.68728e+06	3.01846e+06	3.66231e+06	3.34602e+06	3.61131e+06	3.45316e+06	2.65539e+06	3.4125e+06	2.86413e+06	3.35005e+06	3.3866e+06	2.57947e+06	3.34689e+06	3.32619e+06	3.32718e+06	3.39484e+06
M589T32_1	589.393	31.705								183838	1437.1	43314.7	1918.7	8418.74	175633	212581	466914	155373	235577	173276	90016.2	318769	536096	547324	561716	586691
M498T200	498.254	199.673								4494.17	3158.27	3554.82	2479.35	806622	3434.26	4078.6	4534.04	5171.16	4821.56	6822.65	965767	2345.72	809254	818976	11571.9	814015
M786T143_1	785.584	143.347								1.46225e+06	1.128e+06	1.05952e+06	1.02975e+06	1.12313e+06	1.00498e+06	1.1691e+06	1.35225e+06	1.16898e+06	1.10826e+06	1.17634e+06	1.45472e+06	1.19725e+06	1.18159e+06	1.17762e+06	1.18159e+06	1.16451e+06
M460T36	460.268	36.34								299299	216911	277755	274388	193559	222212	215573	263690	269938	234691	270028	294437	259050	353205	353609	359464	368284
M661T448	661.081	448.013								724284	767409	771205	828208	689406	696688	685428	606904	761239	622976	728679	693095	553183	692158	681010	696996	697090
M1068T190	1067.7	189.872								490842	600522	566486	508077	481798	477460	485575	476748	652254	617832	587245	551190	497544	562876	549926	548930	557555
M490T33	490.298	33.373								140090	7562.54	74984.2	4547.32	11497.5	351274	454746	515837	390681	323032	322728	114286	119964	243133	243151	243228	261925
M494T195	494.321	195.365								608425	696938	351918	538107	514405	575329	589023	382556	501487	726048	666352	658939	487972	606020	605934	583212	599460
M1020T191	1019.7	190.518								380165	745012	381771	888848	424448	771426	851194	321664	720571	475191	690895	663134	286668	712625	713384	717738	920732
M813T140_2	812.607	140.309								1.68171e+06	1.60898e+06	1.57532e+06	1.59872e+06	1.5206e+06	1.38889e+06	1.56765e+06	1.51113e+06	1.70245e+06	1.69362e+06	1.68603e+06	1.57943e+06	1.77702e+06	1.69746e+06	1.69985e+06	1.69449e+06	1.68091e+06
M787T87	786.599	86.931								3.11328e+06	3.18718e+06	2.5845e+06	2.15995e+06	1.66948e+06	4.01398e+06	3.35083e+06	2.55502e+06	2.94742e+06	2.83669e+06	5.31196e+06	5.87592e+06	3.63375e+06	2.37302e+06	2.97191e+06	2.87555e+06	2.58248e+06
M833T138_1	832.582	138.475								1.13809e+06	1.21097e+06	1.38199e+06	1.1522e+06	1.29477e+06	1.13294e+06	1.18785e+06	1.15763e+06	1.23643e+06	1.01162e+06	1.26519e+06	1.12986e+06	1.27495e+06	1.21573e+06	1.25364e+06	1.25825e+06	1.24477e+06
M1046T191	1045.71	191.068								502071	495259	466559	524350	385931	527656	523460	425042	567919	547013	648640	574099	586127	572290	520209	519061	530937
M104T265_2	104.107	265.174								1.53378e+06	1.83479e+06	1.3686e+06	1.2035e+06	1.5051e+06	1.75719e+06	1.42107e+06	1.35655e+06	1.24352e+06	1.27324e+06	1.89939e+06	1.40671e+06	1.05973e+06	1.41921e+06	1.42035e+06	1.42036e+06	1.69532e+06
M449T34_2	449.347	34.141								235776	182962	300400	129708	224873	178901	175786	191422	177945	175422	161754	220179	354743	256385	256960	256962	254075
M702T180_1	701.555	179.56								581897	609509	606835	615075	517421	974505	653996	583327	900772	1.00542e+06	734037	675069	604188	684225	676571	678371	684337
M813T39	812.608	38.637								606346	723311	688704	704452	698252	946046	764572	643931	791573	1.01426e+06	743849	723244	784193	780390	777239	763983	784387
M560T32	560.468	31.766								763864	629707	688268	640311	665221	427025	635664	698801	659713	486203	641492	692922	767954	657860	646554	640676	640657
M530T34_3	530.343	34.154								6502.36	5476.3	4757.61	3626.41	3968.79	3634.44	5021.8	4518.6	5694.2	2905.71	4803.02	5002.87	5921.26	388574	416229	410489	406093
M530T34_2	530.269	34.006								8427.34	5382.84	4500.52	4544.82	6997.95	2591.17	4161.91	3714.45	4324.18	4718.08	5871.23	9882.64	7260.36	444153	443065	14483.5	443681
M102T10	102.127	10.35								1.68979e+06	509574	88137	1.61367e+06	2.8549e+06	730082	319027	491186	426625	746254	600493	504499	480610	1.18727e+06	991626	994432	1.18924e+06
M187T34	187.095	34.141								196488	113927	150909	127171	150014	245197	385283	336912	302426	224340	181184	174940	190694	173673	179669	177729	179633
M787T115	786.599	114.639								5.92094e+06	5.20452e+06	4.49488e+06	6.34455e+06	5.04924e+06	3.14825e+06	1.37013e+06	2.5545e+06	3.78484e+06	1.75763e+06	5.25881e+06	6.12548e+06	5.44947e+06	6.02571e+06	6.1958e+06	6.55593e+06	5.84992e+06
M235T307	234.918	306.765								1.64456e+06	1.49427e+06	1.29269e+06	1.12749e+06	988481	1.07049e+06	1.36395e+06	1.03788e+06	1.22934e+06	1.12825e+06	1.2879e+06	1.70484e+06	1.09262e+06	1.53512e+06	1.53498e+06	1.54303e+06	1.55305e+06
M489T32	489.225	32.3715								420244	247726	309020	296952	294537	185591	226215	231273	344637	275834	293535	262934	386659	279034	279195	294198	285103
M737T32_1	736.539	31.632								466387	184156	234351	222136	340005	251241	172064	225841	320940	277300	177338	322197	328985	441645	419459	419547	419803
M544T164	544.336	163.773								11816.4	6368.63	1568.5	117444	580078	507630	425246	538542	479632	383363	58751.9	329142	103367	3986.25	330841	294215	327216
M811T60	810.598	60.4315								2.73199e+06	344665	1.68519e+06	2.75053e+06	2.95608e+06	3.28383e+06	578241	1.89021e+06	2.76276e+06	2.22511e+06	2.76522e+06	3.32901e+06	2.93496e+06	2.37946e+06	2.37088e+06	1.28456e+06	2.3698e+06
M597T341_1	597.008	340.871								1.75039e+06	2.24749e+06	1.81898e+06	2.29287e+06	1.97725e+06	2.29567e+06	2.1723e+06	1.58392e+06	2.14203e+06	1.71022e+06	2.08276e+06	2.04627e+06	1.48346e+06	2.07421e+06	2.03153e+06	2.05839e+06	2.09378e+06
M661T492	661.079	491.635								2927.53	2994.45	3090.09	24407.7	2622.62	2380.52	2503.91	3218.66	2065.9	2655.17	2484.17	3700.98	2177.4	2413.86	2670.3	2338.84	2339.84
M333T307	332.894	306.725								1.17525e+06	1.02345e+06	875623	708126	637927	691604	920750	666595	830935	740029	892899	1.22379e+06	693022	1.07709e+06	1.06355e+06	1.08027e+06	1.08008e+06
M783T87	782.567	86.656								704602	976206	938385	1.18131e+06	840646	1.21511e+06	914687	640553	923687	2.21463e+06	1.11506e+06	927663	1.10585e+06	1.01971e+06	1.0206e+06	1.04512e+06	1.073e+06
M783T112	782.567	111.677								1.70615e+06	2.52009e+06	2.4113e+06	2.36218e+06	2.99542e+06	1.35074e+06	3.1326e+06	872632	2.88504e+06	2.05122e+06	2.92952e+06	2.03419e+06	2.18956e+06	2.28578e+06	2.28481e+06	173820	2.2759e+06
M704T158	703.573	157.526								1.1813e+06	2.18895e+06	1.09241e+06	2.32563e+06	1.43357e+06	1.81796e+06	2.19494e+06	795074	2.05039e+06	1.03328e+06	2.03428e+06	1.83691e+06	834900	2.13281e+06	2.13362e+06	2.18663e+06	2.18661e+06
M623T452	623.132	452.395								189415	184843	187997	8726.69	158251	178303	178610	137989	199758	177912	214350	190260	156832	200635	216061	216047	212053
M258T408	258.108	408.322								58201.7	116136	54932.8	85140.3	71437.2	54480.6	78046	65175.1	58370.4	58338.1	70130.4	139382	52877.2	93496	61549.3	61620.5	66621.7
M355T430	355.027	429.866								8986.2	15135.3	8326.09	74887.5	9261.42	12146.1	13162.9	11219.3	15750.3	11857	11538.7	10745.4	8518.34	11839.6	11856.5	11496.5	10893.4
M429T32	429.37	32.305								300835	310694	362025	367683	245371	185647	355078	322909	304669	190898	293970	273510	336712	303603	296341	288319	287826
M104T258	104.056	257.527								718.482	2114.31	209785	640.814	1886.86	1295.92	1366.97	1152.58	1098.86	696.621	1318.93	174461	206866	1450.79	1449.18	1449.7	1136.95
M284T123	284.293	123.18								7900.75	7988.81	8151.56	7573.17	7952.96	5542.7	7349.3	15807.9	17826.7	6331.25	682887	6922.2	12814.4	8791.49	8306.16	8533.86	8756.86
M781T146	780.547	145.791								1.02313e+06	1.43359e+06	1.04741e+06	942058	1.18449e+06	926800	1.0873e+06	1.00757e+06	1.06293e+06	903803	1.10022e+06	1.0678e+06	1.05761e+06	1.06979e+06	1.09896e+06	1.09894e+06	1.09897e+06
M267T35_1	267.122	35.3955								400893	335389	300326	302098	280359	376048	312122	293090	340408	348698	334715	357428	347217	322369	326999	328770	327645
M599T197	599.499	196.575								116538	233377	154733	160896	139855	207615	175885	100699	185769	113099	212805	102400	115223	198859	196675	192342	190847
M789T40_1	788.606	40.115								1.00827e+06	1.15045e+06	810399	1.10117e+06	934044	1.34397e+06	1.15128e+06	889193	1.18022e+06	1.18724e+06	1.27838e+06	1.16e+06	1.17687e+06	1.15999e+06	1.133e+06	1.13315e+06	1.14508e+06
M534T27	534.354	26.64								278368	1705.05	230951	2014.07	4292.2	274084	7093.91	2698.93	6554.68	3742.5	171786	2052.04	2119.71	145202	146793	8431.1	22656.5
M496T448	496.063	447.954								363056	352177	339304	373987	333851	326216	317932	307746	349074	258762	407380	264905	269355	325395	325445	324762	310600
M506T33_2	506.293	33.4995								107462	7052.94	63592.9	16815.7	14125.7	258431	283471	301109	274535	165302	218446	79265.9	86234.2	150386	103921	150322	150279
M502T34	502.277	34.155								7322.2	4145.58	3841.81	4481.85	3890.56	4327.72	3790.46	55489.9	4093.02	4224.25	3874.33	4035.67	5980.01	221849	222914	228803	242833
M502T33	502.335	33.001								21914	4814.56	11355.3	5831.7	5815.2	30736.5	53345.8	55786.6	52393.8	25390.8	34442.6	14500.1	19749.4	221568	221856	227726	254475
M679T341	679.011	340.877								1.25001e+06	1.63139e+06	1.30071e+06	1.68844e+06	1.41035e+06	1647582	1.60463e+06	1.13195e+06	1.52886e+06	1.22884e+06	1.48215e+06	1.47966e+06	1.07064e+06	1.51407e+06	1.47831e+06	1.49729e+06	1.52956e+06
M629T420	629.126	419.692								321063	291446	330729	273292	237783	253988	244313	268318	297070	227333	278913	284566	248980	297299	292101	292379	291569
M315T494	315.08	493.64								1.00749e+06	1.21664e+06	1.20245e+06	571034	908731	1.27482e+06	1.14818e+06	569924	2.67405e+06	620373	1.09782e+06	902020	902955	1.06256e+06	1.14909e+06	980193	997134
M690T181	689.555	180.681								340199	358435	347441	342149	235298	450611	335785	387418	335544	536175	426468	290129	345127	375483	384941	366758	384763
M1040T192	1039.67	191.706								336448	436870	340905	361843	433531	408991	390241	309854	434201	400895	472267	429717	374971	426373	426443	434568	434411
M709T32	708.508	31.609								223430	125714	142522	120438	223470	70112.6	99932.5	144861	155385	77695.4	112271	188031	228823	254579	254969	254576	258622
M1045T192	1044.7	191.667								168395	242108	164130	253573	192376	263653	267306	157781	260446	224324	267515	284025	190235	245171	245395	245499	264877
M409T36	409.16	35.999								87875.2	62390.4	71708.9	78296.6	73157.6	162774	60231.4	58588.2	66414.6	207597	67156.1	82490.7	72405	69212.4	69293	77168.6	71034.4
M329T34	329.148	34.0225								190344	135391	2273	199567	1389.57	211486	5718.52	4930.97	3468.21	3522.23	4450.19	167841	2424.2	157208	156987	21060.5	20896.4
M1047T191	1046.72	190.524								263922	283405	253136	293285	205877	264170	284207	252932	311667	296874	319850	290649	283981	276261	270833	252465	276357
M280T385	280.091	384.76								587483	728004	496142	699265	795488	694510	927959	684946	671599	827567	710217	642648	587504	671043	684143	691391	691354
M564T32_1	564.423	31.826								6963.86	6560.7	13621.6	6891.18	8089.77	4760.63	7241.18	7142.27	4866.63	5015.46	6586.73	5385.62	4226.91	36471	35330.4	37299.1	35449.9
M486T34	486.289	34.1925								4288.82	3086.07	2543.11	2363.53	4653.9	1514.32	2408.51	2297.8	2616.77	2500.35	2327.3	2591.55	9808.05	189135	189167	195742	191680
M486T33	486.246	33.462								20821.9	13687.1	12900	12943.4	13284.9	5803.84	8087.21	12556.3	14916.5	9400.29	11886.5	15325.3	20029	200087	189868	218225	203670
M502T196	502.289	195.966								220793	323542	300539	277609	271009	334256	391244	170041	178681	324252	263256	287241	242052	272008	272100	277236	277341
M212T37	212.211	37.384								66775.8	70979.2	59603.6	54841.6	80417.4	129728	70312.8	72549.1	65059.6	136436	55078.9	61476.4	65725.8	58576.9	57979.3	57979.9	62277.1
M811T86	810.598	86.2005								1.62115e+06	1.14403e+06	885335	1.17528e+06	894594	758225	948202	945107	1.1101e+06	1.133e+06	1.34259e+06	1.13124e+06	4.42319e+06	1.44097e+06	1.27809e+06	1.27599e+06	1.35073e+06
M505T33_1	505.219	33.006								210296	123287	146336	140830	115649	97776.9	132831	109212	169152	147156	152190	143007	206695	118466	124168	137027	118908
M1092T189	1091.7	189.256								134992	221405	184758	199169	176435	215383	190884	119666	213504	179324	220648	188396	102050	233954	213550	237937	237831
M550T33_1	550.277	33.267								180274	156145	152052	153208	127123	76546.7	116636	98318.6	160692	101208	154402	147274	198433	133988	131736	131881	126176
M474T33	474.304	32.9085								59255.7	13388.7	32972.9	15888.8	18874.3	149539	205682	240316	177655	129556	122289	64405.5	59995.8	112259	114878	116696	113223
M160T399	160.078	399.012								3955.72	4361.19	462151	5503.68	3063.1	2031.87	3129.64	3152.32	4103.87	1778.3	3300.89	2289.36	416332	2465.51	2284	2265.01	2387.75
M433T37	433.239	37.3435								181765	105679	132770	103965	120312	66867.5	83462.6	279852	120942	12925.5	137256	155803	149320	154914	158509	154926	173693
M790T147	789.546	147.009								554.109	837.489	38606.6	539.527	310.475	42430.9	48371.9	45186.4	48833.6	50974.9	995.048	47378.7	442.065	18333.1	2618.91	4151.01	2022.31
M905T195	904.586	195.352								207683	280224	203934	263729	211488	260951	200070	147857	310133	195989	249986	169308	170424	248952	236077	236059	236087
M401T34	401.339	34.092								52848.9	85176.5	57181.5	72027.9	56391.7	58554.5	53131.8	29256	40601.1	39133.8	45914.9	46230.9	38448.8	64972.8	65151.6	65165.5	62237.1
M474T34_2	474.246	34.23								10791.5	6957.07	4321.93	9112.38	6165.02	163313	229791	253404	192455	142417	155327	5623.15	76652.2	124843	124645	124275	6526.03
M522T33	522.246	33.346								204999	166016	142909	150093	100014	108676	100537	91182	179556	178176	169471	157537	187499	132838	138010	140278	140279
M317T387	317.055	387.26								705228	677727	714181	539725	516253	612393	635682	576568	679850	582890	601521	671002	582634	693745	683632	687154	683635
M433T34	433.205	34.188								66362.9	34486.2	60577.5	23635.6	47852.5	115506	157565	184948	128990	115466	113172	57368.6	4034.13	108830	117521	117465	117387
M786T176	785.648	175.603								367522	356125	331165	331222	319324	477400	330553	365503	383966	555452	364954	333397	367488	445358	473930	431616	431798
M761T341_1	761.013	340.902								856782	1.14931e+06	900563	1.18522e+06	965175	1.17988e+06	1.13491e+06	777502	1.09137e+06	831829	1.03537e+06	1.03815e+06	741039	1.03463e+06	1.03446e+06	1.03506e+06	1.0482e+06
M757T145	756.549	145.189								613491	491812	382368	519769	490980	484047	506030	477642	432982	531542	562238	524548	633127	481232	493944	493439	487925
M537T384	537.192	384.171								195809	326480	156577	311912	372962	255471	456588	257974	270777	299971	306635	252465	199778	241402	244952	243878	245904
M421T34_2	421.315	34.132								100685	76280	119660	51655.5	101132	45335.9	91576.1	87370.6	67564.8	49980.7	75723.2	99297.7	163196	108293	112949	114600	114576
M367T34_1	367.152	34.1045								5545.72	2134.02	2961.8	2764.69	2727.05	3638.96	1335.34	1866.85	2479.41	2422.5	187979	2157.01	4265.1	5650.75	5771.71	2834.21	4925.85
M242T306	242.079	305.887								591750	620129	682170	715800	683212	745026	588346	571210	744857	692560	650529	598367	692976	646047	652315	654072	654074
M526T195	526.289	194.748								262825	355870	338577	381132	293022	374593	485552	192802	201115	369970	277700	284768	280076	314391	310600	323633	324048
M317T418	317.142	417.671								866.914	1300.27	307856	1395.35	2989.98	383524	1992.81	644310	1477.97	318912	1603.47	1922.4	472494	7591.93	4762.37	240707	200000
M104T249	104.106	248.956								169614	312912	135569	321121	158644	275023	192617	48099.9	186432	55244.7	305618	152034	21247.2	229002	224621	224888	237074
M1064T189	1063.67	188.65								128253	236478	177540	177701	192577	204836	207345	137717	212227	169871	225262	172541	112876	219174	218946	220489	229621
M899T488_1	898.918	488.177								83744.3	103371	66728	107079	60118.2	65985.6	98918.2	99584.5	142138	78142.8	105293	91857	44184.4	106629	106911	108516	112947
M137T307_2	136.939	306.563								935813	904463	804329	734601	656670	700704	813754	683644	798832	719842	814719	991735	696040	913792	906045	906265	921062
M805T142_1	804.548	141.525								389668	399872	456573	409332	473860	387128	422322	402255	431084	375334	391521	366806	407768	401578	405597	423999	401609
M357T443	357.012	442.55								10426.1	4863.91	19266.2	70648.3	1137.84	3464.72	3401.04	2416.87	4367.28	1965.81	296.374	3631.93	1596.3	3456.63	3259.9	3360.38	3040.89
M239T35_1	239.088	34.804								68058.5	52367.7	58801.3	54116.9	53867.5	192769	100084	87706.5	84553.5	162156	68055.1	54421.4	60867.7	45978.7	44705.6	45555.1	45981.1
M217T430	217.081	430.053								195579	250482	174996	29016.6	222664	367039	327708	290843	271575	270891	239762	426635	260906	396429	422956	452135	389108
M829T39_1	828.547	38.666								59140.1	76032.6	66175.7	72073.1	77593.5	318982	74137.2	68679.7	64163.7	172787	56123.1	57754.4	53796.9	67658.8	68536.8	67238.9	70838.6
M389T36	389.183	36.145								117761	63209.6	81920.6	89496.7	71434.5	83811.4	87321.3	98871.2	106638	96423.3	114848	87088.2	104206	94056.9	27874.6	102415	102239
M355T409	355.01	408.642								125118	75557.7	152840	237889	51807.7	59480.6	58046.6	69644.8	69686.1	45573.8	68941.4	57919.7	50215.7	68173.3	68279.9	65100.3	61461.7
M790T36	790.377	36.191								82718.1	19364.9	30406.6	30843.8	14900.2	26057.4	19794.6	22581.3	33919.3	24784.6	42532.3	43311.6	2306.14	40450	46648	40472.7	40454.3
M627T307	626.823	306.716								398452	345715	281588	232454	179562	216776	304224	192975	276313	216768	282465	435283	205082	365777	361905	362889	368957
M139T37	139.122	37.1215								130928	146204	140208	160346	140668	202899	132797	148583	165336	193074	154829	98394	142984	135871	151426	141068	135434
M227T261	227.078	260.796								52677	43083.4	24124.6	55716.6	18913	28637.8	17299.9	10514.2	22383.2	37925.5	22241.4	39796.6	21470.9	39103.1	42194.1	39097.3	40696.3
M789T58	788.608	58.4925								937723	855581	976715	896408	703362	1.23251e+06	1.00316e+06	919375	1.42351e+06	984670	1.13606e+06	1.37965e+06	1.01033e+06	1.441e+06	1.4013e+06	1.43868e+06	1.25276e+06
M843T341	843.016	340.89								711223	954186	744478	994883	805543	985115	940625	638561	916933	700339	868339	862632	609903	864644	864556	871634	871624
M173T35	173.08	34.8135								92927.1	58803.1	65373.3	73995	75382.8	122587	153743	127679	116748	101556	96058	69184.6	79699.8	67968.5	71425.1	72243.2	70493.2
M781T40_1	780.548	40.4775								364750	496263	359327	452948	453714	548371	497567	325653	425367	573234	520739	454793	421933	457081	445136	452169	460391
M833T145	832.654	145.181								129947	15788.4	65041.9	112961	119588	91831.1	6338.28	3956.81	5722.12	169905	4235.95	7632.92	124963	6641.34	114453	90532	24591.8
M670T32_2	670.463	31.965								158450	97362.7	103455	138182	126176	89173.9	82159.6	95948.1	152741	120867	122618	108682	156293	123411	121757	123424	116941
M201T38	201.231	38.014								43544.2	34827.7	42357.1	32395.6	55693.8	136277	59346.1	43113.8	40680.2	146573	37309.3	41659.5	56701.4	37849.6	41441	39415.8	42693.8
M809T64	808.578	64.168								476981	7929.82	185347	333744	264991	403688	268004	191589	203265	295598	340857	231577	104689	368365	329207	331063	368326
M805T39	804.548	39.2105								125517	159305	135006	145395	169912	383901	164258	131055	146763	290984	148093	139626	149860	134854	137492	139136	139020
M804T33	804.469	33.462								4248.32	2798.41	2868.56	3625.93	4016.54	91190.2	1981.56	3376.3	2573.79	3076.18	2336.84	4624.3	3313.47	2821.61	2758.55	2846.06	2490.39
M529T307	528.846	306.683								411659	355932	289530	247126	198348	228571	312210	208873	291512	230830	289544	442146	223469	380997	367322	376715	380823
M518T33	518.329	33.343								47266.1	4934.35	30439	4588.52	6704.47	68151.4	147294	152584	123330	49798.5	103022	38291.5	40722.3	74621.9	77623.1	77625	76484.9
M235T464	235.092	463.573								1.04713e+06	1.25704e+06	1.28173e+06	420822	1.27567e+06	1.14017e+06	1.17313e+06	450498	1.24878e+06	1.14122e+06	1.20594e+06	1.29175e+06	1.42034e+06	607029	1.25731e+06	1.19558e+06	1.25287e+06
M147T33	147.115	33.407								90.6481	332.711	35.8414	119.77	110.329	6356.67	48.336	11509.5	87.4903	6397.63	156.472	7139.97	6965.29	400.362	389.312	266.517	3050.28
M315T524	315.079	523.585								1.03387e+06	1.02379e+06	1.0913e+06	545148	434922	871286	999034	859714	972526	525145	948721	1.11302e+06	704231	1.01006e+06	1.14872e+06	974696	971900
M490T34	490.169	34.169								2052.58	98403.5	1541.86	100319	4586.09	2941.5	1037.38	59452.1	90319.3	996.237	57710.4	2092.1	3549.25	60828	9653.46	24165.5	53093.6
M735T41	734.565	41.081								424188	603606	432878	547642	518458	351032	475548	422336	496067	296651	439011	365538	378688	464820	449148	449147	449052
M218T290_1	218.062	290.429								248813	692.673	1621.7	1243.32	2081.93	1976.96	1726.17	1122.88	1891.72	1723.45	1480.34	1107.04	2096.19	219234	1535.39	207807	218899
M351T341	351	340.871								871390	1.04776e+06	916404	1.06576e+06	960196	1.09401e+06	1.08271e+06	821935	1.05194e+06	903593	1.00433e+06	986250	804927	1.01626e+06	1.01815e+06	1.01636e+06	1.03022e+06
M757T40_1	756.549	39.843								347888	326450	188102	306044	312720	423524	407099	237166	270294	411805	447046	403600	452508	311238	324295	324971	330787
M310T34_2	310.308	34.149								12341.1	13136.5	17028.2	20146.4	16213.2	10171.2	21442.4	53693.1	32105.2	22028.6	110772	37445.1	38844.3	44458.1	45130.7	44455.6	44683.8
M237T34	237.111	34.132								121334	97496.8	79010.2	97422.3	84776.6	67802.8	80173.6	67988.7	95457.7	80541.1	81699.6	103657	103221	87577.7	87579.5	81605.7	87559.4
M534T33_2	534.283	32.733								124208	116858	101595	120798	82934.1	46879.1	152274	49559.7	117584	28364.6	95122.3	112282	135716	105172	94612.1	107564	103723
M468T36	468.386	35.927								12520.2	14656.8	11936.4	11454	9321.47	11743.3	6457.99	11566.9	6155.98	2177.45	16286.5	8360.49	19696.7	10732	11112.1	11286	11284
M899T488_2	899.419	488.195								70355.1	81519	53108.5	78235.7	46674.6	50311.3	77486	81559.5	103402	62108.9	81659.9	70782.9	36156.8	82193	83812	85721.5	86512.1
M600T488_1	599.613	488.195								64730.6	80621.6	52099.2	83533.8	38569.1	47260.6	67095.8	68961.4	109740	53420.2	81461.4	62308	31374.9	76788	79781	74886.5	77395.7
M74T169	74.096	169.214								1.0479e+06	584365	1.65645e+06	629841	836453	194808	1.58448e+06	1.04235e+06	597276	315304	1.56355e+06	815340	1.07908e+06	644636	654723	643449	649556
M829T140	828.547	140.285								309813	337111	358598	319359	355753	296062	319417	330937	312711	243033	313283	301007	281802	349733	349749	352989	352988
M539T342_1	538.966	341.504								1.00648e+06	1.15652e+06	1.02939e+06	1.16478e+06	1.0998e+06	1.23064e+06	1.19521e+06	965169	1.14577e+06	1.04872e+06	1.12979e+06	1.13346e+06	962753	1.13338e+06	1.13336e+06	1.13756e+06	1.14794e+06
M627T313	626.745	312.501								839.951	226991	1988.36	1865.17	136407	843.423	1557.3	118859	206752	153094	952.703	292612	1286.33	1454.34	1612.01	1479.54	1451.75
M359T422	359.029	422.327								5934.4	6686.94	7057.84	37411	7113.34	6882.89	6110.6	7677.58	6118.61	14263.7	12299.5	7492.28	5265.16	7610.57	6455.48	6459.68	6471
M105T341	104.991	341.462								1.01529e+06	1.17831e+06	1.04827e+06	1.14425e+06	1.10821e+06	1.20204e+06	1.17107e+06	998642	1.16334e+06	1.06086e+06	1.1485e+06	1.10911e+06	986512	1.13294e+06	1.12543e+06	1.11032e+06	1.14917e+06
M806T172	805.617	172.107								98639.6	173182	185806	103818	133440	249650	144315	117627	129517	169844	132648	72020.7	104185	154787	154802	154786	149676
M703T341	702.971	341.462								774301	921852	799476	957382	858185	980938	955625	752634	934494	825999	921544	888996	756796	902575	914609	914568	914568
M800T175_1	799.664	175.175								307244	288118	335500	271369	274540	322162	276308	293984	295647	512023	405162	370462	326795	329406	388285	305537	298913
M621T342_1	620.968	341.504								905927	1.05044e+06	929189	1.05339e+06	990228	1.11371e+06	1.09273e+06	881878	1.0566e+06	916105	1.04875e+06	1.01409e+06	857646	1.01013e+06	1.01563e+06	1.01333e+06	1.02153e+06
M666T33	665.512	33.349								1042.88	1868.06	3026.61	54211.1	40908.6	23665.2	2999.46	38571.3	2401.41	1617.56	4533.05	1764.66	2940.71	16385.3	4595.1	2987.03	4336.96
M478T194	478.326	194.14								132221	149616	141807	154066	125323	152213	171943	118701	147466	126528	138217	165093	134593	162640	155675	151564	157716
M257T407	257.067	407.086								567404	606839	574084	156904	503856	471046	678729	652342	672318	472119	647632	367065	461952	505121	543801	554188	551775
M578T33_2	578.308	33.358								109075	98714.6	78845	84515.3	52833.5	89032.3	66211.5	43235.5	87427.3	118607	77914.4	43066.7	94383.1	52340.1	55772.2	52924.8	52329.6
M302T218	302.195	218.321								271766	82984.9	219352	83957.9	62083.4	67374.6	97468.3	235101	77299.5	80806.4	305872	88012.8	262652	141570	137260	137334	146197
M814T39	813.611	39.214								195477	252249	227352	223105	215873	296737	260974	206568	256485	306470	243482	238611	249823	261824	254329	262139	263667
M534T33_3	534.323	33.438								19788.1	119171	106977	127503	112940	40002.2	47439.3	100408	43689.8	31525.8	52416.8	12152.8	147380	65206.1	73620.8	63974.5	80770.7
M74T21	74.0962	20.999								1.66044e+06	1.72937e+06	1.51687e+06	1.65712e+06	1.47868e+06	1.43973e+06	1.52118e+06	1.52263e+06	1.59801e+06	1.81699e+06	1.52448e+06	1.50631e+06	1.32959e+06	1.52876e+06	1.53326e+06	1.56728e+06	1.50714e+06
M478T122	478.318	122.252								5332.31	3741.17	11130.4	7260.48	4953.58	2307.76	3538.16	1786.13	1087.48	5468.06	255427	5265.76	4699.96	18508.1	18713.3	19081.5	18778.6
M293T343_1	292.958	342.721								1.16133e+06	1.31385e+06	1.19953e+06	1.32796e+06	1.21905e+06	1.37963e+06	1.36831e+06	1.17494e+06	796512	1.25444e+06	736955	1.2237e+06	1.17629e+06	1.23408e+06	1.2339e+06	1.23285e+06	760868
M446T32	446.396	32.376								71643.2	42525.7	66806.6	3424.28	88818	67625.8	102655	92523.1	61756.6	66719.2	71054.4	57561.9	134171	66690.1	68399.3	66719.1	72799.6
M129T335	128.952	334.98								602883	603127	548941	539090	582170	602502	588491	607724	631271	678653	597538	599519	619430	591632	596593	606555	586703
M129T352	128.953	352.315								1.19395e+06	1.14736e+06	1.18886e+06	1.20368e+06	1.27502e+06	1.41891e+06	1.32519e+06	1.89524e+06	1.29923e+06	1.31045e+06	1.92223e+06	1.94948e+06	1.21459e+06	1.52491e+06	1.86565e+06	1.28071e+06	1.61082e+06
M814T152	813.678	152.494								770582	880086	789556	904132	801435	510726	969078	673703	924995	644319	779716	845675	774364	870835	871090	873586	675474
M680T32	680.476	31.597								98351.8	60328.2	44357.2	48701.6	82538.3	60200.8	1712.19	55238.3	82237.6	75730.8	48326.9	69127.9	75078.5	101741	94366.6	100900	97903.2
M488T36	488.298	35.927								17546.8	24407.6	17040.1	24267.9	16576.6	25072.2	19938.3	26304.3	18723.7	13578	22776.4	32019.8	14849.4	76886.8	79663.7	80989.5	78699.6
M782T43	781.551	42.54								183468	224108	176497	228756	236953	366984	247936	177313	209895	313624	257262	218333	221150	219954	219942	216555	218773
M422T34_1	422.222	34.009								102306	86198.1	91566.7	100143	68227.9	79627	83614.7	82322	81404	74474.9	82505.5	75736.4	84087.9	73808.8	76700.3	76033	67025.9
M177T313	176.875	312.531								496911	636399	476578	450042	684155	678705	685968	620717	506115	742956	676917	626562	692533	646107	587635	719782	629988
M793T39	792.584	38.594								74272	75268.3	58676.7	87614	81614.4	114406	74516.4	62898.1	59145.4	52804.2	59989.9	53840.4	67408.6	80096.5	82177.6	86166.1	80271
M925T341_1	925.018	340.877								412228	556722	431843	601269	446551	581176	555362	368196	537046	402255	510408	471755	348571	498070	494084	501729	501759
M860T197	859.528	197.166								29852.2	44547.6	34724.7	31808.4	29071.2	35151.4	29195.7	19940	35881.5	22894.9	40154.9	24422.7	23571.4	37261	36372.6	40780.1	34152
M785T341_1	784.974	341.403								653742	769267	661899	796034	705815	823653	795288	629480	768149	657179	763765	736012	596798	747542	740624	742695	751798
M807T86	806.567	86.499								295228	445051	338931	522717	586100	548806	421861	373275	290976	308209	453881	384915	338201	530635	619536	532159	541469
M287T448	287.054	448.171								152373	149347	162716	198203	144987	140515	125939	125576	139138	145361	146694	133720	132395	133296	131440	132787	136688
M160T420_2	160.059	419.62								200792	64493.7	220950	243755	344690	186179	413429	196900	193404	391362	403048	187899	395331	400075	281165	399819	399901
M1088T189_1	1087.67	189.228								93114.8	145979	140925	106805	145967	133917	108406	102647	146266	144189	135974	109544	105164	127242	123297	121826	124325
M790T40	789.612	40.463								324538	377052	270648	367544	300030	413685	381638	293306	388695	355302	400462	359771	386409	376429	374454	376878	376873
M790T42	789.545	41.693								2903.85	9663.03	3454.78	3395.16	311201	420604	422306	3373.98	8414.15	9529.7	442633	2707.61	414454	397915	395449	397911	397911
M773T145	772.581	145.178								245029	295905	248483	218515	221980	206210	229397	265860	281936	225859	253512	268824	205487	242976	243904	247946	242985
M497T448_1	496.564	447.922								105644	112819	117381	108996	101901	106983	108960	96536.2	108740	92088.4	116870	98582.3	91221.9	107306	107529	112098	107350
M262T34	262.163	34.142								50394.3	29897.7	31542.9	36290.4	40506	76936	99482.4	86027.6	77645.9	56987.5	53192.4	47372.3	47168.7	40848.8	37605.1	42086.9	42022.2
M604T32_2	604.493	32.124								21489.9	12924.6	21114	21483.6	36289.6	13426.2	15261	12803.3	8676.99	13789	14323.7	15576.2	12532	28154.5	29161.5	29146.1	28564.2
M605T33_1	604.533	32.852								3433.51	4351.96	2409.66	3537.16	3841.36	6878.55	5243.21	3754.12	17719.5	6535.88	5942.73	10769.6	5598.37	9051.74	6785.97	6590.47	6743.95
M604T33_2	604.457	32.8185								11789.3	16434.2	27291.8	15590.4	26956.3	14725.6	14301.8	16682.8	31253.2	13168.8	18594.2	13224.9	9083.32	23732.7	17031.2	16933.5	16834.7
M262T442	262.102	442.271								92344.7	96807.6	79223	28798.7	97036.4	94550	109459	91601.6	112051	99519.3	102282	119746	108971	110731	121045	120469	120632
M732T32_1	732.41	32.1255								129461	68792.4	66515.5	69953	46592.3	51252	57056.1	67722.3	86852.9	71910.8	88701.6	74003.6	89282.8	71984	76580.1	76602.9	75332.6
M857T39	856.578	38.6295								27431.4	36472.8	33209.8	32442.7	29779.5	148326	36412	34166.2	34206.2	88419.8	25834.9	33233.2	30407.4	34097.8	33605.3	34089.4	32832.9
M921T32	920.764	32.207								159641	43060.8	259220	43975.9	136268	48999.8	83130.7	159018	16283.4	36626.7	32445.2	16660.4	208998	15334.7	15222.1	15429	10835.3
M835T62	834.596	62.338								199466	316202	90962.9	87444.4	115656	219843	75562	167831	313289	306144	594572	606709	217749	301700	293807	483570	295090
M867T341_1	866.977	341.467								486818	593899	511697	610545	532443	608716	611407	460528	592160	487566	577050	557590	451202	551047	565692	573821	562190
M835T88	834.597	87.681								250155	354087	285648	521733	248712	327418	364392	432474	367520	467404	390621	553132	253832	429648	457243	439189	456382
M288T58	288.288	57.786								38481.4	52524	95892.5	63739	269519	14380.6	26403.6	46820.9	90612.3	63783.4	55449.2	47020.4	72394.3	102812	102961	103254	169250
M990T195	989.651	194.756								102677	82174	61544.1	74272.5	72175.9	80845.1	95643.7	80788.8	78742.5	113991	89282.3	107795	115615	85788.2	89268.9	91226.5	91250.5
M857T138	856.578	138.104								212724	191172	204639	192548	202599	192202	201535	212792	214197	195873	220371	216347	237355	225744	225522	225522	227553
M809T103	808.579	102.573								206557	398227	196067	223128	223390	742484	244077	545908	393572	351782	238055	281276	403724	387705	452979	449846	346975
M235T493	235.092	492.61								1.66471e+06	838493	222560	109790	166883	212079	1.42118e+06	353186	26940.4	207539	1.48352e+06	288463	146670	185744	220098	212981	219910
M1112T189	1111.67	188.69								59500.5	105679	94192.9	70989.8	112646	95578.5	74331	67187.2	109096	80648.9	84112.3	77540.9	56925.3	90435.9	92566.8	90430	97105.5
M518T194	518.32	193.54								238442	184611	183022	231874	223258	209045	233663	262054	186290	236552	214699	251624	330156	189404	196543	199342	199378
M281T37	281.1	36.6565								52494.6	28988.4	35500.6	41694.8	32095	26560.6	24337.3	34323.4	41202.4	41191.9	38624.9	45185.7	43024.3	43425.9	41517.2	43894.8	43760.2
M281T35_1	281.136	35.319								26397	6697.7	35070.1	6052.22	3627.35	2739.96	5730.14	4077.63	3931.65	10317.7	15244	11184.5	3718.66	26222.6	16627.5	16495.9	17943.5
M653T32	653.438	31.965								92018.7	70710.4	63534.5	88869.7	59245.4	51130.6	52869.2	60167.3	84180.1	66645.8	73152.2	85604.1	70736.3	72893.9	74226.3	75052.8	76672.2
M819T39	818.6	38.6115								35557.1	50153.6	44122.3	43774.9	56610.2	84951.3	45213.1	43890.8	53857.2	47317	44711.4	47235.7	45061.2	53648.2	50672.1	52923.4	55153
M1007T341_1	1007.02	340.902								330846	470472	358851	479646	377198	464543	461615	314866	445358	325942	416017	401293	280525	412396	412409	417125	413246
M257T273	257.146	273.419								43165.6	113854	206196	104979	197065	101714	88331.4	72962.3	133494	50977.1	145169	89022.6	75908.2	103712	103693	105391	105899
M260T230	260.148	229.724								621.867	2104.23	964.996	1562.08	55498.6	1237.59	1318.41	985.444	719.569	1195.16	1839.46	1506.89	1227.78	60190.6	58257.1	62111.1	58356.4
M757T56	756.549	56.333								124507	177232	72852.5	169720	119282	294719	193228	89915.7	148058	354327	198123	173649	165191	150591	143819	147972	144835
M767T138_1	766.57	137.883								206860	191508	244262	182512	221192	167585	195695	232144	224718	129353	257448	223362	215994	189598	191784	200006	189572
M764T146_2	763.593	146.407								286744	281751	273822	289244	303628	242307	270461	316285	290376	258048	263932	239497	301356	268292	261888	268264	251744
M499T199	499.257	199.321								897.303	2637.17	117321	2651.04	219686	95276.9	106085	825.818	1035.31	2816.68	2454.73	2047.19	870.446	49676.9	20754.8	50576.8	4753.44
M503T34_1	503.278	34.1785								5741.35	1601.37	1117.05	2759.32	1997.93	1674.54	1153.29	1832.2	1431.57	6384.82	1877.49	936.929	6170.95	70808	73602.7	75323.3	75436
M503T33	503.338	33.006								6185.7	2377.29	1260.06	2822.13	2970.53	11234.2	15750.1	17571.5	20145.2	6691.46	12035.2	5396.47	5881.95	70619.5	70272.7	15206	69744.5
M483T196	483.325	195.975								28563.9	59616.5	46921.4	44158.7	36576.6	45814.3	51716.3	35481.8	67424.5	48307.6	43898.2	53836.8	30069	50561.3	55412.7	56516.6	53574.6
M676T181	675.539	181.377								139519	104347	87363.7	144845	86788.8	156266	120705	93657.5	115370	183373	175186	117811	135517	117270	113485	112149	112116
M781T66	780.547	66.237								116031	167542	104226	147785	150432	560180	219271	31160.5	179177	421760	173293	162471	178141	154390	154695	172696	154883
M734T154	733.608	154.331								21071.5	30444.9	19888.2	38855.2	26647.8	17205.6	29624.5	24781.7	28527.9	18616.3	27752	65187.3	19703.1	43309.3	33722.4	31839.8	31448.2
M473T32	473.315	32.1325								39988.2	33235.6	27493.2	24547.1	22254.9	65194.7	19875.6	27849.9	28397.1	26533.9	31100.9	43803.5	34057.3	57918.8	53580.3	53598.6	57972.2
M473T33	473.272	33.379								19878.5	2098.67	13795.2	29835.9	31218.9	59227.7	76161.1	84442.5	62044.9	44976.8	56910	23342.4	20636.3	39240.6	45510.5	45562.9	44311.4
M359T438	359.03	438.276								5976.29	7528.04	9566.58	46035	6411.57	7323.42	7454	10962.8	6454.81	8023.53	7666.77	9805.89	8065.32	7087.84	7096.87	4722.77	7122.12
M949T341_1	948.979	341.42								334641	407638	348077	425153	371533	435844	431389	334138	406817	347092	400537	387425	308254	393536	394319	396874	396868
M786T152	785.645	152.467								56199.7	113222	54830	109628	201458	80827.5	113624	171623	107960	72975.2	109253	94922.1	222942	157047	169057	156539	169042
M132T453	132.064	453.033								116399	150890	125746	50866.9	118204	152132	152922	116829	162719	134856	132374	167713	110284	150608	153192	153149	142104
M882T197	881.51	197.193								12553.3	19126.5	18489.5	12293.6	13013.7	10548.8	12195.1	11653	21351.9	12198.8	19837.9	17127.1	9372.56	20156	20153.7	19455.2	17190.6
M377T28	377.32	28.074								7643.56	5173.49	5446.02	4208.11	4674.13	34841.4	4920.71	4336.59	3111.24	30669.7	3359.63	3834.76	4066.2	15136.8	15272.9	34598.1	34650.4
M295T459	295.148	458.94								1632.94	5501.06	5842.61	6713.19	6784.43	4939.53	7132.37	6723.81	196332	2926.57	3299.52	1241.34	5264.56	4134.04	4012.83	4939.24	3875.3
M100T37	100.111	37.343								28749.2	19123.4	21010.5	22774.6	35992.4	40368.7	3107.45	26602.4	22222.7	60301.2	20207.1	23181.7	22749.9	20505.5	18909.3	20505.6	20074.4
M767T39	766.57	38.628								63100.2	71696.4	75071.4	71505.9	87050.9	99579.9	83558.3	68443.5	86167.6	76078.9	67223.4	84321.6	74521.6	72179.7	71880.9	62430.1	70319.3
M600T488_2	599.947	488.21								49976.5	59325.5	40435.6	60583	29655.8	36230.6	48117.2	51102.1	79076.2	39281.8	59524.7	48505.2	25011.8	58327.4	59004.6	57926.9	59001.5
M758T176	757.617	176.463								118163	119181	102819	110856	99797.6	183561	174417	148490	116853	207164	135272	110647	119795	130673	126661	139344	119813
M735T58	734.565	57.578								402154	833260	388351	699177	618671	1.9174e+06	640379	414807	563017	768014	686675	359219	378528	507412	442105	459442	442060
M758T152	757.614	152.436								19583.8	21736.6	75018.6	30145.1	23205.1	26696.9	87759.4	75574.7	29312.2	102180	27889.8	22331.8	15153.7	41691.3	42115.7	58736.2	41443.9
M507T32	507.253	32.2605								36249.6	22929.1	24065.4	26602.9	17389.1	17089.4	90862.1	107627	18990.4	18508.4	23833.4	41154.3	22023.4	80576.3	80020.4	80106.7	29952.6
M240T37	240.242	37.379								20666.2	20432.2	17452.5	13471.1	27748.4	49966.9	31525.7	24681.3	22021.9	52928.4	17820.7	24156.2	26132.3	22802.5	22947	23793.8	23166.7
M698T32	698.495	32.1325								76075.5	59706.6	66641.7	79422.8	65201.2	43204.1	37940.6	52565.2	84134.9	47531.4	58093.2	69510.1	65204.3	69470.7	68439.8	70711.7	68167.7
M496T216	496.336	216.075								85539.2	160492	107917	99689.2	125598	158397	120354	73622	141983	102265	152969	120999	110445	124520	126588	113260	126788
M189T430	189.086	430.106								118472	115633	106754	17359.7	121408	212796	188089	157830	166398	192765	127484	194638	147396	192828	214172	303628	193756
M562T33_1	562.314	32.761								76082.7	53881	57560.3	67257.7	34167.4	60037.7	28140.4	37086.5	53376.8	74207.4	40215.5	53694.5	67792	43445.1	45441.5	45435	44464.7
M769T141	768.584	140.9								150913	215272	217228	239487	221121	183694	209411	232778	254402	139294	204749	205970	219090	206700	217415	217423	215432
M369T34_1	369.167	34.296								123685	85054.8	97340.5	95709.3	80331.1	60972.4	61065.4	80571.7	95254.9	91258.2	96750.7	105622	104881	96753.3	102346	102623	102623
M424T35_2	424.36	34.8045								15029.6	16778.7	13095.3	11947.8	13315.7	18371.2	13447.3	12744.2	13118	8148.79	16615.7	10866.1	30470.9	12639.8	12349.5	13003.9	13000.5
M642T32_2	642.433	32.057								62133.7	43902.9	37590.7	54517.7	40652.1	44279.2	34567.4	48052	63105.9	46309.6	42552.4	46343.1	65019.3	42449	42449.4	42446.6	41648.1
M877T197	876.554	196.576								31942	56181.2	37831.7	50503	37709.6	37780.7	34186.1	24034.8	50287.9	28604.9	48684.9	29658	23440.8	48194.9	50180.2	46882.1	44622.6
M257T427	257.07	426.91								163172	180149	142478	15832.3	194426	190824	214009	198385	235597	192009	208936	183432	168810	202964	161459	217425	192302
M529T312	528.77	312.37								2372.28	1740.43	2067.72	1098.64	3147.33	2614.31	1988.14	2025.73	1769.51	3093.34	2692.95	2076.86	2450.26	1952.11	1850.52	2031.93	2138.5
M335T26	335.199	26.24								79431.1	81677.5	78902.5	23686.7	60640.8	55672.9	95676.3	65253.8	19429.3	70249.3	90467.7	96340.2	92532.2	83234.6	88864.9	81474.4	84429.8
M745T148	744.551	148.159								143925	93700.5	122157	83809.2	106398	91849.3	106903	99365	131812	96336.4	144551	108948	153239	91027.3	96297.2	96574.8	72755.1
M769T39	768.583	38.635								81949.4	82336.2	106638	123628	90372.7	179928	94172.3	107552	130381	104317	105436	91016.1	85265.6	110279	104098	93182.1	113987
M247T453	247.091	453.032								114440	142699	103592	44017.7	107183	139768	165338	104827	149839	131027	139223	161143	119499	152548	155236	162834	144051
M338T49_2	338.267	49.1135								51393.6	50230.9	57186.4	54258.9	77698.8	10627.8	59369	59708.7	34770.6	14023.8	53652	58412.8	55234.4	54063.7	56738.6	54066.7	54068.1
M234T35_1	234.132	34.834								36583.1	30543	29069.2	27758.1	32375.5	57412.4	64261.8	56683.9	52321.2	45941.4	47744.8	25731.6	33736	29208.2	30984.4	29208	29208.4
M321T34	321.314	34.006								5206.8	6695.82	12076.4	13663.1	8349.1	8396.24	10663.7	29490	24092.9	11441.8	33368.5	37563.5	25486.2	41486.2	43721.7	42251.9	41480.5
M568T341_1	567.986	341.453								324471	404637	322717	413053	355938	412107	403564	303689	391982	315326	383393	383048	292997	375828	375858	375984	382944
M346T523	346.008	522.769								377246	284253	384750	324018	144070	257208	234208	247173	260541	195016	269379	272280	163719	300798	293447	284638	284653
M819T137	818.601	136.698								142514	150640	193834	147301	168369	134019	137546	175421	177635	96420.4	171355	136078	164369	174080	196674	173997	174009
M1031T341_1	1030.98	340.89								190850	234261	200979	244398	214275	249200	252900	189452	244232	196512	231688	216649	175282	225011	225019	227003	226168
M398T174	398.324	174.026								115620	115015	56314	127684	102183	175270	162041	107752	96327.9	160806	88953.7	98645.1	112176	115871	110952	115339	115875
M765T32	764.57	31.592								43657.3	26842.2	30780.6	36758.9	28313.3	70524.6	25322	31281	42981	57711.9	32296.6	31196.1	30060.8	40279.5	39144.9	37826.9	38305.1
M74T214	74.096	213.997								328162	456878	382028	437114	383335	495500	344791	335527	495821	376880	338890	543638	377721	436690	360986	362363	362121
M219T161	219.056	161.373								161135	135893	168365	144161	147567	143384	139148	175884	145662	122847	135087	152371	143475	146781	142694	142670	142683
M773T40	772.581	39.858								130334	158569	137179	151664	162705	216433	165081	146188	191571	155270	187942	201252	145669	169983	165954	167328	169604
M637T32_2	637.302	32.1325								43412	66632.1	46020.7	40279.1	29726.8	33531.4	71833.9	43275.9	37753.7	45186.9	61622.9	64618.5	36543.1	44383.3	45601.5	46843.9	46821.4
M331T493	331.044	493.202								162973	201983	156485	173394	448815	449072	380818	102578	527925	87192.6	452926	123508	89034.3	386287	308062	364827	310815
M316T56	316.319	55.784								18418.7	20789.8	22804.3	16887.5	64730.4	3466.91	8639.79	21348.1	21357.7	12020	14432.7	29515.9	22566.3	148982	152986	153003	152146
M551T31	551.325	31.085								76388.9	53478.6	4079.11	4510.93	8529.91	3502.88	3806.13	3839.41	4141.52	3226.69	3969.78	5706.28	4631.2	46394.3	10878.6	36257.5	23503.6
M647T32	647.454	32.3255								83564.8	48151.8	50241.4	56127.8	34646	45749.6	20816.2	39873.1	65033.8	65502.8	42688.5	67587.4	77321.5	73664.9	81473.4	74931.3	73628.4
M375T342	374.96	342.151								593123	679885	601042	684573	649644	706340	713303	590241	662376	637398	665448	658661	583430	668364	668786	670904	670897
M508T195_2	508.372	194.763								88532.9	118215	103862	130975	95446.8	116567	104359	79449	106927	84409.8	110924	84694.9	59060.3	87684.9	95492.1	89880.9	90875.3
M293T522	293.097	522.12								167659	158713	207315	96493.8	58215.6	135078	108857	106093	182379	90830.8	151919	185066	82676.5	163529	177539	158027	144856
M562T33_2	562.354	33.361								81982.1	56029.2	6176.96	71460.8	42432.9	28359.5	33570.6	35108.1	38790.3	32586.1	25431.5	56331.9	75715.5	21317.6	21927.4	21932.2	18628.1
M349T34	349.134	34.043								59349.6	55541.5	48581.5	62218.3	43632.8	39097.9	45037.7	44839.1	50578.9	36130.4	48671.5	62233.8	54675.2	53138.9	49483.4	54770.4	52397.6
M143T32	143.015	31.754								79331.4	70320.4	65191.5	75748.2	65758.2	46200.5	90634.8	84579.6	66714.4	53887.7	86680	95012.4	59275.2	75407.1	73119.9	77118.9	82838.7
M821T142_2	820.581	141.542								85404.9	66971	200182	187215	160728	47373.8	79830.1	108196	236915	42191.6	64632.7	39851.4	49143.6	123369	103894	123400	37264.8
M299T396	299.001	396.245								12087.6	17500.7	68562	182803	2019.09	2197.28	2674.61	4006.3	5249.68	2717.93	6144.31	2275.24	2230.01	4593.79	4195.48	4625.59	2434.65
M855T38	854.563	38.0065								12569.5	17872.8	20269.3	15211.8	16919.3	47562.4	18017.9	15226.2	17850.9	25970	13874.9	14690.1	17045.9	20035.2	20955.4	19113.1	20496.2
M385T34	385.163	34.123								73653.1	28599.5	37208.6	46769	40069.3	24686.6	25934.1	29585	45492.4	33575.7	53456.6	38632.1	52021.9	31969	31520	1484.04	31644.2
M445T32	445.365	32.376								52572.3	80192	68246.3	71737.7	74268.2	68207.8	103660	70809.7	83485	54044.6	75847	64135.9	86524.7	70631.6	72143.8	74364.5	68954.4
M897T32	896.764	32.3715								104019	20771.9	136023	25722.5	70398.5	26400.3	49438.8	94321.3	9067.98	23702.9	20623	9141.85	139148	8795.64	8788.79	8121.37	7991.61
M524T218	524.367	218.292								76646.7	153932	9657.65	11999.1	9078.5	157366	139019	67278.8	160083	93402.6	186717	186897	83888.7	108593	34127.3	96706.4	108538
M910T196	909.541	195.856								39607.1	60827.2	57690.6	51221.9	48439.5	64239.4	65943.2	36934.5	66609.7	49017.6	56209.1	54092.9	43372.7	63914.5	63975.9	63818.5	59710.3
M702T157	701.555	156.798								109882	245094	112030	245702	150052	225289	238749	88821.1	247380	80417	247111	171784	81936.7	246565	240576	242502	270681
M855T137	854.564	136.635								96402.2	105809	124474	95692.5	103258	84481.1	93209.6	103055	96606.9	72856.2	95908.5	85417.5	105604	106515	108248	108940	108937
M346T431	346.019	430.837								80287.6	49410.5	90225.7	75206.1	13676.6	22640.6	22346	38139.6	42513.8	15724.8	46990.7	48369.6	19901	43609.2	43278.4	37219.6	38621.7
M793T139_1	792.584	138.523								151661	164238	202505	177029	178246	164485	165302	201721	198677	102904	160652	151191	156591	179995	180695	182601	181812
M440T36	440.354	36.196								29795.4	25311.6	24702.2	21489.3	17747.9	12648.8	19451.3	21420.3	24063.4	10898.7	33668.2	38427.3	30003.7	21187.7	21950.5	21284.1	23523.5
M425T36	425.133	36.084								26822.6	16940	22344.5	22207.3	17624.1	34432.8	14447.6	16486.4	16631.9	47469.9	18660.5	25998.2	21711.9	19558.1	19614.9	19799.2	25126.4
M791T137	790.573	137.303								102418	89276.2	124877	99147.8	103455	70393.8	74212	108951	109192	57117.2	120919	94496.6	123114	99907.7	100467	99914.5	102219
M102T122	102.127	121.706								1.83256e+06	963653	847243	294096	882197	251106	1.22373e+06	758424	1.56497e+06	1.26528e+06	1.67389e+06	969371	834905	1.16858e+06	1.06541e+06	1.16223e+06	591663
M704T200	703.57	199.647								124425	149074	118964	111228	108838	111123	129134	122320	135754	104834	135614	103023	130172	129370	119583	119703	119690
M728T177_1	727.569	177.047								77356.7	69426.2	46447.9	56026.9	49230.9	107842	59635.8	67598	65226.3	129662	79754.7	64853.6	73653.7	75464.6	75216.5	90871.5	75073.1
M576T32	576.463	32.2885								15900.7	19174.9	43359.7	28448	45325	19326.3	26453.9	24907	41892.6	7292.37	21199.1	33791.7	16624.5	32928.1	32960.9	31548.7	31599.8
M577T33_1	576.503	32.768								16761.3	14095.9	11420.5	10560.5	8819.42	7212.67	9931.38	8702.94	42197.6	9316.44	19828.2	10257.4	20875.2	10462.8	10374.2	18557.2	10403.1
M801T143	800.612	143.355								151250	142493	235848	144442	138562	221041	163723	316603	180723	166908	168776	319909	140043	215742	250276	248422	250080
M370T178	370.292	177.704								76164.2	77895.3	40655.1	92308	76667.5	151772	105679	74445.1	68162	93229.8	53128.4	59954.2	66386.1	82280.9	76341.4	83970.5	84000.7
M666T23	666.055	22.5515								793.179	480.222	1313.81	468.585	1150.14	638.572	249.461	444.129	34458	78.0142	510.761	420.074	113.907	1388.91	1298.91	1144.96	1096.55
M552T187	552.398	187.414								91770.7	107806	108179	99729.9	88901	96224.1	110597	107516	115374	107838	110269	104776	71745.1	111124	110560	112037	109795
M553T32	553.366	32.138								57435.6	45984.7	61722.3	50703	52383.3	60883	42137.6	55326.3	52228.4	71782.7	47228.3	52254	60263.5	60690.7	59906.7	59898.1	63315.4
M176T348	176.039	348.406								200771	144284	131725	166834	116799	136996	147190	169831	148173	113983	155683	132279	137977	147002	147047	146569	142863
M801T146_2	800.549	146.383								15739.9	18979.9	16549.3	36621	17019.7	9645.4	18374.8	265824	269626	14806.2	17095.3	26791.9	187312	185088	44515.7	185531	185575
M991T448	991.116	448.091								73263.6	70352.1	69115.8	70232.8	70103.7	71122.4	73925	64577.4	73323.5	70519.7	65889.5	73931	63660	67878.3	68148.7	71113.5	67897.2
M645T454	645.111	454.186								46764.7	37950.5	51000	82898.3	40775.3	35743.3	45775.4	40149.1	49058.4	43437.9	47005.6	48610.4	35577.2	44503.4	42916.7	42913.9	43714
M161T400	161.054	400.47								448.077	1192.8	928.515	5302.23	645.319	691.468	990.282	846.923	5021.15	3072.96	932.035	852.341	475.469	1626.75	1464.04	1527.05	2537.39
M538T192	538.419	191.716								17565.9	20533.1	18563.4	19112.4	14853.9	22177.9	9970.4	23350.4	46137.2	10259.2	18226.3	18032.2	13841.5	12727.3	12675.7	16028.6	12714.5
M900T488_1	899.921	488.21								35107.1	39979.3	27641.1	37607.9	23307.7	25627.7	37312.1	41933.3	51455.5	30070.7	41452.1	35068.4	18642.6	39618.5	41018.5	41252.7	41709.2
M184T353_2	184.093	353.033								104597	137291	128002	93403.3	113621	105957	110903	74891.7	135675	117713	140775	120820	92688.8	127063	127140	129853	132111
M542T191	542.32	191.094								73085.6	90418.3	81995.6	73210.3	89198.5	68937.8	70883	67601.6	89375.6	109888	90556.3	96113	90868	86282.6	88471.6	85904.2	89840.3
M130T152	130.157	151.855								32063	13804.1	41207.7	16613.5	44456.2	10984.7	28059.7	22085.3	12034.2	8676.1	41164.3	20876.2	14851.8	31901.1	31621.1	33056.9	35023.2
M804T172	803.603	171.525								40765.9	64030	75484.4	42228.7	52794.3	92386.5	56838.2	42765	51376.6	74034.6	54806.8	29649.7	42727.9	63307.9	61295.9	60228.1	60082
M777T137	776.554	136.628								175525	176179	196017	193291	163052	123330	149661	192463	205358	93767.4	183112	174361	177959	175634	173115	175711	166636
M506T190	506.356	190.44								81259.9	83094.5	82369.2	93567.3	73620.2	95309	105931	89130.3	79853.1	101207	94134.9	97010.2	84558	97950.4	105670	97667.3	99936.9
M609T341_1	608.988	341.439								228393	294230	233611	297843	261425	298341	296267	217366	280873	231286	279676	268929	207182	271508	272179	273720	273715
M811T175_1	810.649	174.581								73911.1	89753.3	80220.4	84247.2	69010.2	118889	82804.9	64463.9	77502.2	113626	99814.3	71655	74438.5	84511.1	82583.2	84615.6	82065.6
M993T31	992.765	31.48								42372.9	21499.7	95811.9	15870.9	46604.1	20387.2	29919.8	40659.7	15479.6	18566.2	12211.7	8633.15	31278.4	16728.8	14469.9	14997.9	14424.4
M829T41	828.607	41.047								3901.53	4847.61	7475.85	6540.11	16551.5	31622.7	7324.96	19073.8	29084.2	9119.25	6668.07	9299.59	3548.01	7425.97	9322.37	12728.4	7411.27
M394T35_2	394.35	34.67								348.382	491.151	369.032	706.356	583.594	1149.82	447.286	540.855	291.869	435.266	6780.59	9051.67	10796.3	1551.31	1484.52	3991.1	1508.58
M1006T193	1005.68	192.921								49130.7	54986.2	42181.9	59369.3	48316.4	43794.1	52543.8	43386.4	51499.7	49184.9	52536.4	52325.2	38207	60513.9	60412	61981.3	64601.3
M836T62	835.6	61.69								246140	151816	88229.8	322330	143951	223634	175021	137394	173057	160161	407353	161092	399819	330776	370573	306407	216395
M495T194	494.775	194.137								83991	99450.1	88026.4	93536.6	92790	89123.9	100971	65156.7	106425	86252.1	93953.6	79372.4	67749.1	92965.6	92008.5	91856.3	98668.5
M839T153	838.555	153.117								11247.7	26959.6	13296.8	9747.83	12309.1	4550.22	14616.7	10248.2	9216.75	2485.89	10455.4	8825.7	10686.9	16545.9	15939.6	15936.5	16133.9
M791T38	790.568	38.185								24864.8	33250.7	85683.8	97019.9	24986.6	66865.9	26796	30559.2	128650	91782.3	105825	109280	84276.2	81061.2	72940.5	66554.1	66286
M431T307	430.869	306.716								165573	141559	120535	103658	85031.7	96589.8	133228	87977.7	116730	98480	121686	177903	96454.9	151351	149646	149685	155428
M745T145	744.584	144.567								53960.4	70522.1	69312.8	75584.8	68645	60668.7	46400.8	85020.4	52481.4	50794	94206.1	96562.6	34987.5	80115.1	85927.5	76213.2	76459.3
M784T176	783.632	175.724								66057.3	74910.1	72926.6	66099	59979.6	108812	71445.5	62489.7	70908.9	110170	77493.8	66417.7	69980.2	84158.7	80804.5	78623.1	78522.5
M102T152	102.127	152.442								273677	201786	262514	291490	265825	115089	274343	99457.8	171676	107392	234355	252100	255169	268051	260918	281563	287256
M826T448	826.099	447.839								53080.5	44123.5	46022.1	44267.9	50913.9	41013.1	50924.8	45972.1	43980.2	45617.8	49825.1	48224.4	46603.3	49235.1	49264.5	52684.6	49233.2
M1051T190_2	1050.74	190.485								49882.2	47640	45589.8	50721.1	30902.1	39777	42919.3	43279.6	47173.9	64281.7	51210.5	64675.1	44918.4	54538	51814.5	53082.9	52075.6
M812T199	811.663	199.01								112716	135017	120083	132010	120736	112617	137797	107154	129134	138716	108892	120403	122268	131375	123571	127399	123350
M235T524	235.092	523.864								448419	241082	327353	186567	210565	250328	489657	264963	300801	251043	261966	287852	362264	338603	190239	335108	333876
M735T87	734.565	87.169								225992	348495	241742	353956	345493	356576	312848	242723	306136	242945	141818	173842	250438	265842	265948	265918	225633
M650T341_1	649.989	341.453								222813	284840	220953	285928	252467	287556	275820	213995	282409	222397	267501	254136	201047	265260	262152	267914	262933
M733T40	732.549	40.474								122036	139954	88644.6	134675	138497	220206	200760	102010	152020	126862	197523	144537	161606	144457	144452	146305	149048
M774T149	773.53	148.801								10989.8	13356.1	3958.35	12163	15792.8	10219.4	5974.38	7459.67	8393.71	7240.44	9748.16	8529.41	6775.57	12101.5	12184.6	12670.1	14738.3
M546T32_1	546.406	32.207								18686.3	17523.6	24032.8	14536.1	12031.3	60436.8	53888.3	16736.5	28023.2	1390.14	46465	26135.4	35822.3	30669.3	23681.8	26200.8	23766.9
M546T33	546.361	33.384								31746.8	15987	6243.83	16052.2	10897	40761.8	36715	39727.6	33883.1	28643	25823.4	9681.29	11832.1	26144.8	19024.5	18915.8	18932.9
M247T50	247.087	49.7335								51544.2	31723.6	40469.8	48547.8	37058.8	10146.5	34016.3	49152.6	32024.5	19275.7	29072	35809.3	39536.8	37090.3	37090.7	36774.1	34858.6
M210T37	210.195	37.0115								10867.2	17316.2	17295.4	12226.5	18106.2	30400.9	19271.9	22579	14917.9	23272.6	13688.1	10900	11648	12514	12666.5	13256.4	12915.8
M429T459_2	429.019	458.929								40082.4	52081.6	40166.9	150501	39916.3	51536.2	42492.8	22347.1	58365.3	29621	67987.7	30558.4	20717.3	55165.6	42233.1	47579.9	42571.6
M796T39	795.605	38.619								36145.5	63185.4	46218.8	60539.1	55534.6	93196.1	53160.8	59506.7	56028	53873.8	39275	42522.9	59825.7	46362.2	54039.2	54041.3	53975.3
M527T341_1	526.985	341.433								211598	269237	219923	289355	244906	279854	274946	197542	251624	211033	257555	245211	202473	253322	254158	255524	254102
M1136T189	1135.67	188.622								23874.1	39590.6	37086.7	26612.2	44529	36048.8	30803	27205.9	38660	35423	30470.6	28180.9	19754.3	39514.3	38935.3	38429.5	39509.3
M764T40	763.592	40.478								129574	141672	116772	137703	132395	471439	152783	136031	158636	108414	175176	124500	136175	139130	139007	139699	146508
M871T33	870.748	32.694								80505	11881.9	70032.2	18374.6	38779.3	18219.4	32154.3	66793.8	5934.97	18524	19336.1	10034.1	117491	6274.9	6281.04	6116.53	5516.66
M825T140	824.614	139.702								79016	127719	156183	4456.8	139827	81811.1	97779	176923	120939	107661	63507.7	97875.8	129863	81375.7	128288	128301	128553
M605T198	604.534	198.414								39212.9	52552.6	36158.3	42967.8	35339.5	46727.3	41128.8	35204.5	43666.5	25936.4	39720.5	29945.7	32431.5	42288.6	41190.6	42277.4	37413.8
M366T34	366.371	33.569								3593.69	2980.91	6446.48	8749.41	5937.39	3692.81	5219.3	12484.2	12502.5	7580.58	25179.1	20264.2	12618.1	18061	17537.7	17925	17762.5
M102T717	102.127	716.854								98188.4	172487	106714	152366	120893	374838	221816	27441.8	70440.9	180019	187757	72579.3	194539	232410	197852	259872	213927
M773T341_1	772.993	341.403								132059	171027	135292	183370	144513	183380	176512	121634	170579	135976	170502	159391	127061	160689	162992	162982	162984
M817T175_1	816.691	175.036								230867	123922	195683	127906	136893	134786	121610	179318	111659	273104	138023	126351	235700	130093	124489	131909	105260
M1014T194	1013.65	194.127								66446.9	56471.1	38921.2	71788.4	47319.8	57083	62827.4	54246.9	57405.4	63404.9	71252.1	65851.2	59649.7	58719.9	58750.8	60040.2	59742.9
M805T135	804.579	134.707								87230.5	91594.9	93725	81109	84564.4	27522.9	103378	101229	77734.3	16616.1	77815.7	95833.6	114092	93581.6	93556.1	86253	91759.3
M812T152	811.659	151.874								258336	436817	249024	468713	273826	334037	427702	191609	378081	241843	422089	374786	174572	400753	389517	401096	331923
M717T149	716.519	148.853								74491.3	61018.4	44855.6	64065.7	33920.8	62925.5	55943	42663.4	74730	59280.5	101453	65443.9	86731.9	64010.9	61443.8	59971.9	58576
M503T193	503.327	192.905								7328.29	8026.78	5012.39	3239.41	8367.26	10375.3	3880.53	6105.51	24113.9	7493.53	4567.37	7844.69	41938.5	26249.2	25865.1	12546.9	21177.8
M457T33	457.279	32.784								13830.9	2795.84	7917.52	4498.57	2521.48	15587.7	37362	28632	25110.2	16326.7	21870.6	5993.07	9383.24	19038.2	21151.1	17232.8	19471.7
M202T389	202.081	388.594								46154	53727.2	54254.2	41460.7	29061.2	34449	41358.6	31269.5	43678.5	33006.5	35579.9	46385	28776.4	45470	44704.9	44026.9	44025
M432T49	432.236	49.148								199531	106561	105605	80376.1	91819.4	7023.93	76252.6	110880	92077.9	49888	70745.7	113338	163418	136174	136187	136179	151851
M335T35	335.277	34.956								37001.3	28413.4	25746.1	24903	23410.4	24084.3	26252.2	33256.5	30743.1	23340.4	34019.6	33839.2	1436.51	28827.9	29175.7	29644.4	27451.4
M718T179	717.585	178.975								89191.8	69543.6	101940	74653	74159.6	92508.8	90998.1	98911.6	79985.8	125577	94754.1	79198.6	103395	76840.9	80247.4	83789	74631.2
M794T39	793.588	38.609								33951	31261.3	38678.8	37816.9	36640.1	69843.7	34386.6	40995.8	37969.1	42761.4	31700.5	28990.4	33169.5	32892.6	32903.9	33320.5	33757.9
M155T35	155.069	34.8045								28068.1	17797.9	18685.5	18504.2	21807.6	31748.9	44093.7	40620.6	32603.6	29093.9	28188.8	19005.9	21080.3	19823.3	20136.5	19698.7	19697.4
M691T341_1	690.99	341.439								184697	242000	188871	254113	203625	246826	253999	169049	245152	185013	235969	221003	162686	217785	218871	224418	217830
M74T242	74.096	241.814								464045	485997	823562	420922	773352	522815	734488	771359	858131	549167	711043	676563	780282	581677	641996	658252	658107
M402T34_1	402.225	34.072								40246.2	32445.4	24931.3	24978	29248.8	15109.7	23456	19064.4	23785.1	19925.9	23980	30878.8	30660.3	19671.1	19825.8	19472.5	19946.3
M547T32_2	547.456	32.055								4659.41	2750.5	2993.05	2655.62	3340.54	10822.1	3046.14	3920.64	11871.5	3359.52	7962.95	2851.84	4318.34	4091.6	3930.65	6806.36	3992.38
M1089T341_1	1089.02	340.89								161933	221343	169040	240728	178792	231930	223067	148360	214657	165351	207180	188500	137662	195655	200277	200253	200255
M357T34	357.167	34.092								36118.7	30046.9	25615.4	25443.8	31084.4	22865.1	25640.2	19529.4	29279.9	23672.1	23418.8	36979.6	36293.8	24436.3	25054.6	25775.7	27424.2
M625T32_2	625.407	32.085								47865.7	32717.2	40742.3	41268.3	31743.5	22334	26590.2	27193	43577.7	30102.4	39456.3	43812.2	42134	33837.4	28603.6	33816.1	33540.9
M662T448_1	661.581	447.922								44841.7	43205.1	36942.1	47611.7	40929	36054.6	45692.7	40246.2	39237.2	38142.3	45328.3	41052.2	33537.5	41119	42201.8	43406.5	41091
M943T32	942.748	31.541								100897	27369.1	93085.3	34943.5	46707.2	33758	48659.1	59472.6	15194.2	31714	19256.2	18424.8	65896.5	18185.7	17554.4	17837.5	17414.4
M283T35_1	283.106	34.834								10796.1	6553.87	10880.5	10353.6	19960.9	10899.3	18970.2	16909.8	9805.84	11558.5	18198.6	10076.2	16989.7	16999.6	16680.9	18515.5	16685.2
M607T488_1	606.94	488.19								31886.5	34768.5	22333.8	35845.2	21836.6	24339.3	32478.5	33821	39011.6	31738	34106.7	31894.2	18666	32056.3	33301.6	32555.1	33287.3
M336T35_2	336.324	34.676								9526.63	10453.4	12423.4	13396.9	7951.4	7663.89	10705	34852.4	18971.8	15750.9	54367.2	29762.9	27725.9	34524.2	35877.2	40081.9	36239.8
M588T32_2	588.499	31.6055								56008.3	48783.8	55849.5	54321.4	37910.2	62478.2	43378.7	48777	64703.4	72611.8	49676.8	46309.9	52057.5	49240.5	42461.8	41478.8	41521.4
M487T32_1	487.333	32.167								3159.95	2112.04	1454.43	3203.63	1871.78	2329.56	2255.2	2355.03	2269.56	1292.38	3104.6	1433.2	1437.23	3512.75	3636.3	3424.57	8715.21
M683T32_1	682.535	32.055								18104.7	21520.1	16210	19512.3	25947.4	30005.9	26958.4	12453.7	17233	20669.7	36232.9	11790.1	25158.3	25790.5	23040.9	25796.5	25422.2
M635T32	634.536	32.236								27955.3	23642.2	14927.8	27755.4	23079	29750.9	36348.3	13976.5	18208.8	29569.7	44708.8	37776.7	35877.4	27738.3	27023.1	29144	28288.1
M566T33	566.412	32.837								3213.82	2412.38	4157.32	2367.62	2762.31	1753.04	2830.89	2136.47	3120.83	1291.14	4036.93	1992.79	1507.86	7183.15	7888.94	7120.99	7440.94
M732T341_1	731.992	341.42								166960	215329	167242	228089	192676	224579	225654	151917	211470	164321	203130	195091	149798	203774	202983	209667	203063
M621T248	621.301	248.361								21217.1	38300.6	24561	31067.8	42267	37886.2	38863.7	26833.7	27891.8	26973.1	32776.2	29203.2	23840.7	34885.3	34886	35270.6	35262.4
M726T158	725.553	158.011								112665	231734	142921	191493	181773	204220	190369	93229.4	199861	140814	185207	167000	91937.3	194497	194456	199189	199073
M884T37	883.685	37.414								12008.2	13899.2	14226.5	13691.7	17610.6	13618.7	16436.7	13707.9	15056.3	17243.1	19241.8	12513	17071.6	15879.7	15570.2	15639.3	15571.3
M626T195	625.515	195.353								27806.9	48523.3	35082.1	34810.1	27134.6	35886.1	43089.4	19235	38102.3	38197.2	48259.4	28272.3	35324.3	42773.8	41850	47678.5	40087.4
M607T453	607.155	452.648								29952.3	18914.3	21362	425.856	17716.5	17997.2	15034.1	19155.1	23718.3	21536.6	17308.7	18452.1	15875.4	18840.5	20682.1	18378.6	18360.5
M496T35	496.417	35.333								5285.31	9620	4832.96	7925.51	7475.34	8589.76	4126.44	7410.7	2907.94	4224.58	7882.92	5010.32	4552.99	7507.09	6036.99	7708.31	7698.09
M809T343	808.934	343.405								138460	251437	242780	158806	262911	276939	175815	275980	283075	260147	151976	132564	258565	252440	252323	189951	252391
M642T24	642.379	24.422								643.936	559.689	4590.4	730.277	994.474	562.874	1021.71	668.417	636.796	677.85	990.446	910.131	2086.76	703.351	703.121	702.529	767.418
M622T168	622.403	168.309								1853.81	13723.3	1436.6	2683.26	985.924	3230.81	1618.47	2205.81	3165.93	2272.15	3933.13	3025.31	1701.51	10041.2	9794.91	10453.6	10260.4
M301T407	301.025	407.485								6055.77	10976.9	6167.24	75890.2	8235.13	18949.1	13181.1	14368.9	12063.7	12925.3	6071.14	15001.6	12050.9	8054.9	11168.8	10767.2	10134.5
M301T396	301	396.351								17499.1	3712.96	9639.22	100343	1993.94	405.665	2018.09	2893.3	1835.29	1580.85	1003.16	2398.18	1921.7	2376.57	2228.69	1745.65	1525.18
M332T448_1	331.548	448.091								54152.8	60407	59816.5	68282.1	54935.3	50068.9	52231.2	45711.1	61570.2	53427	64156.3	53832.9	43854.7	49148.7	47294.9	50091.4	41934.8
M580T342_1	579.967	342.06								230868	265542	237880	278522	256505	287307	284818	228570	280189	243906	261274	261130	235351	260106	262898	262640	264098
M452T35	452.391	35.3485								5663.75	8121.69	7421.59	5129.12	5628.18	8148.95	4143.64	6522.55	4519.66	3274.86	8909.45	3676.82	18946.4	7296.58	7016.05	7016.19	7016.09
M363T35	363.307	34.701								4178.61	5402.37	1567.66	5600.65	2355.26	3654.17	1997.84	4385.9	2274	1236.8	4774.62	1680.93	16851.8	3462.66	3161.06	3506.98	3370.3
M791T40	790.615	40.471								83471.6	99282.5	81869.9	99830.2	77455.6	98640.1	106731	85492.6	106537	93126.7	99032.2	100784	94335.5	99018	95873.3	98248.8	96986.4
M733T57	732.55	57.4335								73924.9	65755.2	48673.2	43674.5	98804	189597	60840.1	65459.5	48084.7	252129	179231	88536.5	135658	103189	103068	106146	103090
M603T248	603.291	248.361								21548.2	34254.9	23335.3	32666.8	42604.3	33993	36592.3	28113.2	25408.2	26593.3	31100.9	26973	21187.3	32677.2	31435	32797.9	32801.3
M140T274	140.067	273.51								82789.2	111134	153600	108921	160908	111096	102047	98137.1	121312	77387.7	128549	102031	99910.6	113689	107586	112818	113588
M849T136	848.643	136.474								80855.2	85814.5	93407	77162.1	97523.9	66207.2	84082.5	89988.5	85234.6	67157	73380.5	59317.9	88369	90441.4	87964.2	91529.3	89534.3
M798T138	797.616	138.286								30893.6	63937.2	120509	60606.9	110621	91154.3	94052.7	118879	119918	83252.5	43709.6	98239	73888	50715.2	53604.4	27819.1	50241.3
M666T34_3	666.329	34.129								14330	6730.81	30036.6	2298.43	26511.6	17362	18418.6	33670.7	26654.3	17539.6	19521	16518.5	12772	21660.7	25159.9	26651.9	26558.3
M556T35	556.438	35.333								5340.89	4602.33	7322.74	5524.59	8171.8	4529.8	3307.58	3323.15	5699.05	1827.15	6624.72	4381.41	6218.85	7907.9	7316.07	7933.94	5018.5
M1195T31	1194.81	30.955								3309.96	1847.64	4003.55	4947.49	3856.7	4276.08	9384.61	11953.6	5737.08	4036.03	19865.8	14332.2	13732.4	35426.5	35190.4	40765.6	36841.8
M202T298	201.932	298.348								88636.7	77539.3	53087.7	69342.4	29990	43639	59647.5	42597.8	54332.1	26531.8	67609.7	61016.8	31813.9	64699.7	62647.4	62867.9	62615.4
M832T145	831.651	145.188								12930.7	10723.2	62033.1	16327.4	10697.1	52758.3	10927.6	9291.85	20941.8	45748.9	13082.8	8327.35	7957.39	34422.7	28545.1	43239.5	43421.5
M860T38_2	859.685	38.014								16557.7	14978.1	13633.1	15938.8	17453.9	9188.79	16409.2	13391.1	13457.9	12296.2	23341.3	18223.9	23118.3	20009.5	21964.5	20135.5	20013.1
M732T156	731.601	155.512								271163	303164	190370	372414	252694	222322	279842	178762	274408	195573	270339	318892	206544	263145	269356	269362	246301
M715T32	715.384	32.16								38600.4	28857.8	24659	28953.1	18240.5	17571	18750.2	24503	32169.9	27498.9	20069.2	32259.6	30935.6	24587.7	25590.2	24540.8	30209.5
M280T35	280.262	34.7155								7873.37	7799.33	13305.4	14937.2	10790.1	5669.97	10350.4	7475.34	6587.55	10558.6	23306.7	12019.7	8060.38	12116	12120.4	10640.8	12123.3
M234T35_2	234.183	34.792								2498.4	2551.63	2604.56	2507.3	3084.04	1437.11	1752.82	550.148	2945.79	1560.75	3008.89	3607.85	1179.4	6372.29	6536.02	6682.32	7092.72
M600T488_3	600.281	488.199								25741.9	31679	21085.1	29164.1	14626.3	18131.7	23223.1	25364.2	38932.1	20556.8	29923.7	23686.9	12916.4	27441.7	28085.2	28030.8	28084.2
M102T681	102.127	681.073								492610	121908	118967	373256	140349	158428	93461.2	123592	118919	287900	167550	123259	99481.1	156309	134218	133931	133693
M346T454	346.008	454.279								25434.2	24654	40037.7	27979.2	26976.4	27908.2	28670.2	24707.6	38160.1	32698.2	24639.1	31109	44202.6	32245.8	31287.3	32250.6	31503.6
M317T113	317.209	113.436								49559.8	40270.1	57086.8	10286.2	5789.33	9118.2	12600.9	2142.82	1490.03	1000.37	1191.67	2769.52	9673.31	13316.6	13300.4	13310.7	14547.9
M659T32	658.536	32.103								27485.1	24985.5	19205.8	32089.7	24024	36116	32589.2	15528.4	14975.9	26770.1	32492.3	23582.7	28165.8	30581.8	28512.6	29317.7	28058.7
M735T120	734.565	119.561								355724	218183	560359	719825	626860	200036	890804	166905	308467	469354	645224	120570	520362	336177	511565	510402	477783
M512T35	512.413	35.4375								8859.78	9005.93	17630.3	9142.54	4951.87	9668.46	3656.86	7019.15	4769.33	3414.96	9848.32	2494.93	4286.94	5796.49	6109.08	5559.38	5998.64
M183T306	183.004	305.786								101876	107218	118857	126803	121400	131875	101565	96392	128420	121453	108665	97463.8	122258	111132	110575	110746	111133
M736T58	735.568	58.304								201182	218042	190262	238469	246547	856284	215846	170627	273979	115886	294606	181966	205720	230686	228623	225381	230844
M177T439_2	177.086	439.238								212397	237556	395829	98238.5	226857	227643	235421	226477	261538	237108	240742	265427	242052	249994	250022	250044	255754
M347T32	347.223	31.8655								45462.5	44270.3	42414.9	37279.9	44122.1	41026.9	49285.5	53442.7	43056.9	39209.1	46890.2	45440.5	39766.2	51255.3	50844.2	46910.1	51242.7
M768T39	767.573	38.619								29917.5	35255.2	32804.3	35746.3	48109	57425.7	28747.5	37534.6	36943	36530.3	32303.6	42154.6	37723.2	39575.8	37578.2	38415	37589.4
M814T341_1	813.995	341.467								115021	145905	116703	153576	127902	160526	149527	107282	151644	113379	144499	132800	103909	140034	140048	140073	142990
M290T34	290.194	34.132								22523.7	11270.4	12259.6	12708.6	14801.3	19056.6	36662.6	36451.6	28727.4	16859.3	22085.2	17295.4	19293.1	16564.8	16023	17955.3	17080.8
M781T85	780.548	85.22								102374	128120	90348.9	126115	108820	299247	149460	91838	109173	211832	185871	108268	125737	125916	126788	132421	132555
M315T35	315.132	34.804								10020.7	5211.57	6269.48	3850.56	3051.23	26945.4	27030.5	26275.5	20896.5	20965.4	20954.6	10832.3	7405.95	14351.9	13679.9	13937	13684.1
M776T171	775.571	170.575								32482.7	39743.1	42495.1	34066	36908.3	55132.6	39867.3	28566.4	36614	53698.9	41926.7	31370.2	39744.9	46511.7	46610.2	52853.3	47122.9
M349T416	349.016	415.862								26439	21207.8	32471	34253.9	12478.7	18774.3	17332.5	20625	20503.8	17127	19797.5	19184.9	18000.8	19480.7	19661.4	18391.2	18086.1
M607T32	607.387	31.562								36340.4	17523.9	24148.3	20606.3	33498.1	18260.7	17734.7	19700.4	27582.5	14632.7	26320.6	30002	28019.6	33325.5	36215.4	36214.6	36217.5
M415T34	415.318	34.4205								9761.14	11647.2	5090.22	34039.5	15961.2	20101.3	18742.8	10436.2	15694.9	10666.2	12504.1	10174.6	10774.1	11928.9	11972.1	11964.8	9615.44
M815T40_2	814.622	39.534								88245.3	116070	81421.5	100170	96322.3	140940	109630	92770.5	108040	118366	102829	93901.8	87328.9	112981	110656	111941	112435
M769T145	768.549	145.188								59970.5	50408.6	51495.7	28820.4	18166.7	77823.9	61898.8	28335.5	67698.8	88941.3	40711.1	40233.1	63771.5	50710.8	43600.6	44547.4	47163.1
M235T273	235.164	273.188								36283.6	43051.5	71189.3	39922.4	89458.8	37375.5	33037.2	28436.1	44225.9	15971.9	54046.7	32091.6	28586.3	40891.2	40882.9	41593.7	42091.9
M340T306	340.054	306.025								129643	136962	142460	145024	137591	146781	127603	118877	156680	142377	132121	132722	137124	140013	140880	141821	141591
M633T329	633.321	328.906								12024	13241.6	15440.5	6454.99	4504.12	6146.53	10239.8	7931.01	8200.94	20372.5	13806.7	11647.9	6546.67	12763.5	13190.6	13133.5	13190.4
M169T37	169.168	37.367								29803.7	20956.2	35758	21753.1	35298.9	23206.5	22757.7	884.064	21350.7	39970.2	20117.7	24000.5	35349.5	22672.3	22751.5	25584.9	24200.4
M770T39	769.587	38.628								35337.4	47668.8	56048.8	44793.4	53756.1	98833.9	50289.9	56408.3	62707.2	60150.2	58115	48117.1	45691.3	60452.8	59026.9	64369.8	59061.4
M823T39	822.627	38.6175								27820.4	33657.6	22466.6	31899.1	26034.2	39310.9	27984.4	26011.4	33475.1	30685.9	24437.1	30017.8	28138.1	31239.8	31231.8	32910.6	31735.7
M154T163	154.06	163.338								93419.5	96849.6	76235	102027	67816.7	78626.6	108753	62849.7	67773.7	68164.2	88567.3	80298.1	66157.5	85511.4	86944.1	87828	88758.3
M1113T341_1	1112.98	341.403								114421	146433	121847	157515	126485	156721	153924	114613	146896	122444	141429	140825	100054	141785	141768	145379	143447
M202T410	202.081	409.642								458.071	11783.6	12641.5	12786.7	12583.1	8945.07	10286.4	12051.8	12329.6	12492.4	10554.1	10938.4	10951.2	11698.5	11699.1	11512.1	10994.3
M249T34	249.111	34.147								54804.9	51608.7	37907.6	45972	37319.6	40906.1	43556.4	40808.5	49427.7	43541	57252.7	49911.7	54303	52453.4	53521.5	47359.2	53495.8
M417T31	417.255	31.215								1152.97	4739.03	14092.1	32514.2	2265.43	4949.68	4971.1	909.294	5076.08	2821.28	14485.7	948.943	6327.76	4432.58	3981.34	3644.13	5381.03
M217T407	217.081	407.457								167560	171106	162618	54897.4	85825.2	84577.8	96990.9	98437.8	165629	78391.1	99501.5	100524	92416.8	127253	120974	115967	116066
M177T505	177.086	505.072								93797	551481	570216	65524.9	148804	221386	54793.8	299930	1.10456e+06	135019	181206	312747	137650	186946	185700	258545	184932
M606T33	605.543	32.767								6652.43	6871.03	4457.91	9003.6	4843.27	5381.93	4904.87	5179	5885.55	6784.94	6240.03	7141.49	7712.72	8882.95	10184	8359.75	8314.97
M480T57	480.275	57.083								78584	60740.3	91317.3	65405.5	66276.7	30115.1	88795.2	81547.6	99246.4	67338.9	76074.7	59996.3	86340.3	55933.5	55392.7	55617.4	55392.5
M926T196	925.515	195.988								10357.6	18526.8	12526.5	17291.6	10776.6	13209.4	13386.2	6356.65	16158.7	10502.8	15318.6	12421.4	6669.23	15260.8	14404.8	14959	15264
M321T26	321.183	26.425								44693.7	68569.7	24831.1	79781.8	39932.3	40692.8	10921.1	17552.7	17095.5	37858.1	42629.6	3623.29	13668.4	33982.5	34823.5	34192.6	33981.4
M825T145	824.553	144.57								29538.8	148156	38145.7	36661.3	95981.9	35367.6	34018.1	34795.5	40430.6	225651	51345.1	36802.3	37852.8	46764	48698.2	46611.6	51841
M478T88	478.318	88.4195								5393.79	3466.58	10135.3	7847.13	2994.89	183.466	2688.94	1662.37	858.993	272.671	234059	4516.36	2919.52	17414.3	16887.5	17245.5	16974.9
M797T146	796.522	146.399								83177.4	97304.4	93275.6	85866.5	92527.2	94005.4	83202.7	82924	81794.2	100679	75468.4	62704.9	87815.4	91687.4	91716	91717.9	98390.5
M204T320	204.122	320.32								111900	116264	129612	133453	96376.1	97515.4	92388.4	87469.8	134280	108154	108248	115928	115739	119885	119937	118272	116063
M349T439	349.016	439.117								11997	10798.9	18139.1	10471.5	9761.04	11830.1	11503.5	12650.5	13301.4	11055.7	9352.44	11165.9	12153.9	10322.4	10351.2	9888.33	9880.28
M725T307	724.798	306.687								78651.6	66454.3	54632.5	43186.2	34787.9	42152.4	61261.6	37885.9	52866.9	43371	55503.9	84689.7	38153.6	71063.1	70410.7	71792.8	71784.9
M318T376	318.189	376.047								35651.9	28312.9	14156.7	39923.7	18914.7	34518.3	31916	29929.3	20706.7	32102.4	25539.2	25711.3	28264.6	30174.3	30169.4	30178.8	31087.4
M332T34	332.159	34.142								2142.31	3828.16	6248.93	3344.61	4570.48	27537.8	25081.8	25677.9	21254.9	19797.1	21383.1	11455	10706.6	12768.1	13968.8	12076.9	13246
M583T33	583.383	33.3805								25619	16121.9	12101.7	18364.7	15876.6	22954.6	10853.7	9333.23	17619.4	22044.2	12862.5	15551.2	15891.6	19278.6	19639.3	17519.4	19638.9
M662T342_1	661.97	341.504								189199	227575	200967	240666	219109	230356	227541	190290	235871	198596	229763	212190	192331	219166	220059	221448	215844
M607T488_2	607.274	488.19								27221.6	27769.7	18287.1	27849.3	18095.8	19112.2	25536.9	27686.9	31114.1	25290.7	27234.4	26369	15748.7	26180.6	26897.4	26234.3	27038
M744T341_1	743.972	341.476								156550	187300	168648	203924	180395	197724	205974	156312	185099	160187	182415	184428	154166	185952	182168	185928	185930
M908T37	907.686	37.389								8576.41	14492.3	13943.9	11034.8	11657.7	13633.4	10843.2	9719.32	11876.5	9853.18	11918.6	9903.74	11348.8	16621.5	16032.3	15815.6	15813.1
M502T192	502.325	192.32								17504.3	11084.5	18573.2	17565.5	33202.4	25681.5	22792.2	19088.3	27182.6	24913.7	21663.7	17438.9	21882.9	24612.5	24249.7	23687.8	39716.6
M856T141	855.651	140.933								7902.6	8819.39	75689.4	62145.7	7606.08	4842.26	58124.3	6795.01	8148.47	3853.63	56796.3	5577.14	6287.05	17012.6	35513.3	35457.4	23263.1
M173T39	173.2	38.6115								13702.6	10983	12084.5	18031	16100.9	24190.1	17840.2	14121.3	10181.2	27360.7	13835.7	13175.4	12610.5	13198	10315.7	9411.51	9310.62
M649T34_1	648.625	34.132								18008.6	12540.1	19025.9	15403.9	20744.8	18889.5	14541	20382.7	14694.9	16516.1	30378.2	16188	42138.6	16076.1	17037	15269.9	15085.9
M444T33	444.381	33.499								27199.6	27525.2	30798.5	28386.8	31098	22624.4	27685.5	26686.8	30653.6	20986.4	20985	28048.6	34758.7	28173.8	28180.7	28152.7	27087.7
M521T36	521.243	35.973								22513.5	22257.9	24135.3	23361.8	23609	20023.3	25653.1	21543.2	22222.4	19769.3	20729.6	22688.4	21925.3	22474.5	22003.2	22909	22075.2
M727T345	726.932	344.944								147094	264412	154851	160531	158361	294172	192132	261516	149828	149689	174052	307992	264816	209816	225898	239439	212169
M428T32	428.385	32.376								1028.36	7314.52	12570	14687.3	20821.5	12373.8	25150.9	15929	12759.7	16662.2	17514.2	12985.5	25824.8	14269.3	14971.9	13417.7	14139.8
M296T384	296.064	384.174								79282.5	86357.8	66689.8	82954.2	95842.2	88111.3	109133	77681.2	82316.4	89299.9	84796.6	87047.7	68432.1	89433.8	89453.2	90705.6	90704.1
M760T32	760.441	32.2935								42438	28558.9	26932.8	28911	22814.5	16194	24354.1	27082.1	25150.5	17002.8	27880.9	30868.6	35758.2	23456.4	23301.2	23456.8	23161.9
M292T453	292.179	452.805								56344.3	67675	58986.7	30586.5	55502.2	89809.8	98846.4	49780	77403.8	66211.3	68100.5	69476.3	65586.5	74224.4	80168.7	80159	80182.6
M827T448_1	826.601	447.839								26201.8	29698.3	35851.5	29503.4	32606.4	24782.9	30088.6	29619.6	28025.9	22794.7	32972.6	29337.4	28032.3	30945.9	30969.8	33395	30884
M148T204	148.041	204.222								17227.7	18960.7	21620.5	25405.8	16064.4	18516.1	20301.5	21706.2	16104.2	12586.5	20044.6	19172.4	17384.5	23855.1	23856.6	24134.7	24653.9
M146T232	146.026	232.151								56297.3	90972.4	98044.5	83653.1	94807.7	117470	110644	78572.9	72803.5	72948.6	74331.8	87514.7	90322	96748.4	96931.8	99140.5	99101.5
M644T35	644.488	34.956								4802.61	7538.43	1141.76	6403.63	5440.44	3211.82	7072.85	3840.87	3511.96	2815.28	7908.27	3633.34	2355.83	5794.99	5114.46	6697.71	5245.85
M967T31	966.749	31.427								46069.5	16841.9	61433.5	18970.4	32603.7	19236.1	29151.5	32135.5	11645.5	19704.5	11600.6	8538.67	35952.7	14500	15000.9	15456.5	14470.9
M441T34_1	441.188	33.505								19819.1	15393.6	14344.7	16611.2	13836.3	9030.18	10276.4	11871.2	14785.4	14348.2	12856	13971.1	16620.5	14129.7	14159.7	14150.4	13189.5
M546T32_2	546.452	31.705								11870	22796.7	10382.1	6548.26	6498.48	7327.57	8124.43	8405.32	8890.27	12977.2	8509.23	6918.04	9656.02	8696.19	9589.73	8568.71	8949.17
M540T35	540.443	35.4515								7641.03	7792.8	12633.8	11134.7	5996.18	6993.11	6428.83	12909.9	10933.4	3990.4	8787.25	4953.88	10483.9	8840.18	9011.34	10179.1	10047.9
M645T346_1	644.929	346.332								265343	183418	269512	166127	191124	180850	185886	174415	182348	166651	192675	168255	167758	174854	183251	178524	176723
M727T32	726.526	32.229								30609.1	30890.3	26352.6	31107.2	27499.9	27820.8	21060.9	26128.4	39029.7	32437	25156.6	27079.4	30272.7	32736.3	31549.9	31051.9	32086.1
M793T144	792.548	143.965								34813	27713.8	27399.7	31782.6	33840.6	43460.6	33372.8	33403	33502.7	50095.2	30021.9	27318	36820.5	29661.8	28393.7	32135.1	28284.6
M802T137	801.558	137.255								9398.62	62515.7	13038.7	57120.9	54926.7	56867.8	5976.18	13871.8	77380.8	60068.7	5060.62	6527.3	4629.25	71718.3	67830.8	71235.8	70205.8
M896T341_1	895.997	341.423								80322.6	110413	84105.5	114430	97548.9	114473	106805	75023.2	110055	83438.8	104086	94404.9	71504.2	101617	104483	105265	103154
M1171T341_1	1171.03	340.902								99743.6	132632	102930	143827	109132	136001	141427	90973.3	133595	97269	129603	115720	88125.8	121783	122411	121798	126290
M731T33	731.38	33.477								14362.2	13798.8	12865	15620.1	27159.1	8680.53	10607.8	12352.4	13795.8	12503.3	13572.6	15329.9	11636.3	12155.7	12305.3	13785.4	12169.6
M1030T192	1029.68	192.337								21451.2	22056.9	23538.9	24378	25294	26831.3	24337.8	23120.6	23085.5	26056.6	28124.7	24097.3	24925.3	27183.4	27309	27376.1	26516.7
M242T277	242.098	277.499								42374.1	41490.1	36414	29613.1	32776.5	40221.8	45305.8	48675.9	47045.4	33159.2	44434.1	30622.4	32000.3	43507.5	43391.5	44104.6	43390.7
M755T43	754.568	42.79								26335.9	36854	28494.4	28144.5	30679.8	39720.6	104238	40738.6	28188.9	28006.9	28574.2	36495.3	22210.3	37268.6	35313.8	34878.1	36326.9
M773T57	772.58	57.2795								88078.5	94697.7	78698.5	102983	102812	75812.1	116875	105238	107095	151312	79260.5	106985	76494.6	92122.2	103244	107141	107620
M365T297	364.902	296.659								63277.7	62976.6	28902.9	48386.2	25721.7	38702.4	46104.1	28576.7	32871.3	20769.5	57496.1	38105.8	23923.2	47866.6	47072.4	47378.8	45820.3
M291T35	291.251	34.771								26061.4	21185.1	19190.3	16975.6	17616.9	16965	17039.2	24841.3	24555.5	16063.6	17022.8	25881.4	23581.2	20533.5	19069.1	20982.6	20964.3
M765T144	764.519	143.958								114503	65251.7	80741.3	66914.4	34639.5	71015.5	69013.4	48171.3	77527.3	66200.3	109646	51303.6	102291	69247.5	77967.2	71242.4	69315.8
M604T33_1	604.357	33.1495								3290.2	2279.35	3350.77	10033.3	1456.7	3729.87	3568.41	2651.73	2097.39	2824.8	2601.86	2615.29	3734.07	4963.63	6489.31	4974.53	5321.96
M792T39	791.57	38.6395								27643.5	25532.7	22317.1	22044.7	8518.68	34650.3	33740.5	14972.1	33458	22052.4	23302.2	20995.1	35424	29685	26077.5	28751.9	27747.3
M575T32	575.499	32.3655								31512.9	33910.5	30387.5	24405.8	26935.5	19191.9	36853.7	27475.4	22593.8	21103.9	56013.4	34884.7	49292.3	30109.9	27655.6	30109	30116.9
M637T32_1	636.551	32.2495								30208.6	28260	11791.5	30608.9	23460.8	29979.9	36226.5	19194.2	26953.8	36605.8	48614.2	40208.5	42457.5	27805	27155.8	26660.2	26635
M797T41	796.522	41.076								28173.4	46141.3	34766	47996.9	49069.9	227020	46977.1	32107.5	47772.5	201680	39138.1	44696	38193.7	47460.5	47538.9	44072.3	47980.8
M920T32	919.752	31.754								64753.7	19221.3	48933.6	22156.4	33798.9	19042.7	32470.5	48806.5	10532.7	18802.8	16541.1	9429.71	64666.6	9710.02	9685.46	9148.49	8968.19
M263T35_2	263.236	34.822								13435.6	17802.8	12063.9	14652.3	16945.4	10491.3	16202.8	9715.38	7397.08	9964.9	26039.9	16602.2	17045.4	14987.6	15931.5	15136.9	14986.8
M133T35	133.099	34.618								7071.61	1487.99	857.146	1421.79	954.429	1518.42	697.401	4072.19	4969.74	1876.64	1673.5	6802.89	1003.41	25736.4	26546.8	26547.5	26281.5
M849T140_1	848.553	139.702								40129.8	34689.5	34168.9	39412.6	27255.8	39691.1	32831.9	26932.9	42122.3	58695.6	29414.7	36814.5	34293	30172.2	36180.9	32747	35131.9
M462T36	462.272	36.101								17729.6	11359.4	13474.3	16395.5	9331	17440	14096	11989.3	14847.5	15322.8	14964.7	15674.9	16858.1	18996.8	19415.6	20740.5	19024.7
M130T439_1	130.048	438.615								159500	155205	151992	138906	151618	124870	132519	124472	105186	106301	132874	127761	130708	115740	116074	116115	92919.7
M781T124	780.549	123.88								181151	184514	114049	150129	248272	174271	201834	136646	174467	323036	66674	254593	232746	210299	87836.3	205432	202562
M745T41	744.552	41.381								61096.6	38672.9	42219.1	88608.8	51771.9	42588.3	51825.5	50474	64267.2	62596	87059.1	60853.1	75990.6	66232.3	66318.2	62774	53149.6
M756T146	756.169	145.797								75549.4	71331	70632.1	73691.8	76751.4	73889	90920.7	68886.5	74975.4	57410.3	80130.7	73673.5	72150.7	73071.5	72432.8	73903.2	71166.3
M257T305	256.981	304.769								87170.8	115988	120022	123268	91386.9	139703	107530	92974.3	157535	76699.8	107227	97156.4	76889.9	122055	120131	121447	122057
M504T197	504.3	196.575								29885.4	41639.5	39062.9	33612	33385.1	34220.8	39041.6	24124.4	18131	42444.7	33932.5	35840.9	29791	31614.3	26886.4	31400.3	31570.6
M523T190_1	522.717	189.869								40243.8	46315.9	30156.2	56952.2	34183.9	39895.8	40899.9	40815.7	41101.1	50294.3	36327.2	47110	32219.3	47381.9	46558.8	46573.8	46559
M764T58	763.592	58.054								88783	132952	102535	158656	109051	181268	120844	93960.3	144683	137906	163702	92331.9	111790	151090	147042	151078	131254
M649T32	648.506	32.2695								42309.2	6944.04	9019.45	30303.2	17858.3	21382.3	7424.82	8486.85	1546.37	32365.2	6623.63	7820.56	33421.1	40662.8	41386	41246.9	39996.2
M948T32	947.782	32.185								44489.6	10702.8	72935.7	12263.4	39348.6	16432.4	20870.4	40279.5	3210.53	10560.8	8641.37	1583.75	54672.3	4802.51	4783.61	4435	4326.18
M829T146	828.605	145.788								19555.7	10443.3	9890.04	15908.1	19298.6	10897.1	17473.2	40016.9	16385.8	7673.94	16772.9	14409.2	7560.66	14153.7	14665	13621.6	12285.3
M235T547	235.091	546.574								80241.9	109281	81198.2	40329.2	58574.1	70271.4	95670.1	59384.8	78669.9	59356.7	23142.4	59196.2	94785.8	61935.8	58360.4	58826.3	59718
M721T149	720.584	148.822								86362.8	81920.3	96956.8	91343.6	93255.1	62361.4	80955.2	115483	99266.1	64305.7	82712.6	77663.6	90523.3	82123.3	82104	79867.2	74020.1
M339T387	339.036	386.998								98926.1	99636.8	100807	79299.4	89645.6	102776	104301	92660.8	110609	105655	95470	97439.8	96891.2	105183	107413	107766	107756
M385T33_2	385.344	33.3955								18171.4	28024.6	16094.3	22247.8	23223.4	19068	19260.5	14653.2	26345	13735.3	20533.2	16272.1	25587.6	22818.8	22847.7	19068	22101.2
M631T196	630.546	195.959								23228	37052.6	30282.1	37483.2	29040.1	36695	32474.6	24307.2	42726	34460.8	24650.8	23707.4	30298.5	41648.5	40285.7	41796.6	35030.4
M572T187	572.365	187.44								37438.1	51242.5	46810.2	39607.1	42601.2	49011.1	44220.7	43160.5	51072.9	44431.8	44177.8	36550.8	35563.7	45640.6	46845.8	46529.5	46839.2
M833T102	832.578	101.504								109937	58374.6	130982	55332.8	149346	63221.1	57345.7	63919.2	176076	148285	147131	38585.3	162488	48636	44928.5	25539	83685.2
M209T377	209.052	377.31								26627.7	30626.6	26074.8	25120.8	28712.2	34269	33050.9	20841.2	31476	32543.9	30065.7	31320.6	26664.4	31082.9	33025.5	32843	32939
M823T40_1	822.537	40.303								7653.11	21245	11756.4	25961.3	10424	26503.7	25646.2	9732.9	24798.6	11562.3	26218.4	5273.58	17172	7804.15	10122.7	8839.81	10911.2
M371T34_1	371.115	33.8145								4861.44	5649.1	3697.41	6430.5	5210.59	8948.29	4795.28	4538.42	4658.53	6716.38	3755.42	3852.31	4618.38	6012.6	6385.07	7394.16	6052.97
M380T35	380.334	34.8065								11965.2	10145.9	7818.36	9282.99	7081.26	12881.2	7093.38	9819.03	7135.27	6704.92	9217.79	7933.97	17376.7	9484.26	9362.22	9358.23	10141.7
M654T32_1	654.328	32.2935								17169.1	21038.7	13918.3	17750	18620.8	13395.8	24683.4	17265.4	19120.8	20176.3	19989.9	33231.9	17308.5	19245.6	18592.5	19367.7	18569.2
M260T33	260.236	32.995								15185.6	11076.2	17423.7	13185.1	14805.3	7570.23	13460.8	14624.5	11957.9	9975.49	11717.4	6342.54	17746.8	15494	14394	16721.1	15166.7
M177T481	177.086	481.08								193130	180079	342939	272747	396768	209695	416864	122247	390346	426226	382281	421214	443199	283504	408571	408216	407737
M352T35_3	352.305	35.447								19149.6	15920.2	12641.8	10289.5	13647	13840.4	18538.2	16650.5	22026	12357.1	31023.5	23719	15690.5	30251.2	29825	31151.5	31172.1
M462T203	462.264	202.933								4696.42	53557.7	31236.2	22225.1	41004	43729	19840.1	11934.4	5634.07	19828	16004.1	14017	32851.4	16864.2	16826.1	17013.4	17011.3
M514T32_1	513.787	31.76								29020.6	24626.3	27227.5	25641.8	24373.6	24105.3	23109.2	26587.6	26034.9	20216.5	28266.9	25297.2	27879	27842	27325.8	25167	27864.2
M309T34	309.147	34.003								22014.8	19776.9	15444.7	14929.1	16372	11977.5	12836.3	13975.5	15329.2	15927.1	15101.3	21113.9	19397.7	16626.6	16495.5	16495.9	16883
M563T336	562.926	335.683								96632.6	103806	96817.4	101406	108536	106374	112832	103608	107450	109275	99525.7	106741	103669	98402.9	102658	103993	103990
M381T34	381.313	33.512								4813.1	3593.9	2479.21	8648.75	5591.47	20088.3	17238.2	6499.38	7206.04	5785.15	21356.8	4825.04	3074.07	4721.85	2117.64	2612.01	4768.7
M629T34_1	628.599	34.132								18264.1	18547.5	14590.3	19191.6	13822	15137.9	15073.7	18031.2	17324.8	16621.8	27901	16802.7	24370.1	17203.7	17206.6	16314.9	15648
M847T135	846.63	135.341								62861.6	65451	87202.2	63335.3	80265.5	47602.3	61484.5	65893.5	70819.3	37501.3	69006.7	58094	60368.2	69679.7	69334.6	68193.6	66172.6
M825T40_1	824.554	40.484								17989.9	23593.9	19699.7	25110.5	51017.8	70309.5	17678.2	12716.8	25066.3	109206	27830.6	20038.3	20969.2	26848.2	20570.4	20628.3	21804.5
M319T28	319.282	27.6115								1468.78	3618.31	1693.63	2113.18	548.066	2993.88	581.277	1106.33	401.327	519.564	1428.76	597.693	2537.81	895.43	906.273	918.679	956.569
M429T459_1	428.985	458.572								31341.2	53804	31840.4	86048.2	24252.2	3911.32	2552.47	8615.38	13593	2339.78	25634.8	5442.85	1191.41	19985.2	22570.7	5287.14	23151.4
M116T33	116.051	32.975								1852.79	1003.53	1776.02	2051.75	47698.6	1756.9	2662.5	1886.76	914.783	1639.25	3661.74	837.771	3140.02	1499.77	1322.33	1242.3	1493.44
M802T341	802.014	340.89								77108.1	112491	82175.6	119154	87584.5	110247	110964	73513.6	114042	75485.1	100561	97514.1	68643.8	97805.6	100544	99191.1	101431
M869T32	868.732	32.144								54214.7	11959.1	25683.8	14343.8	19637	11806.3	25406.7	34430	2126.23	15185.3	14152	7215.27	69978.9	4454.45	4022.04	4236.28	3394.18
M563T348_1	562.927	348.48								151037	155706	149403	147165	150034	180510	157172	243450	154339	161948	257403	160335	152404	163091	162991	162050	160503
M580T174	580.357	174.006								1281.78	11713.7	1265.03	1645.53	6154.58	2730.9	847.422	1449.64	2023.31	1149.74	3147.75	1244.09	1005.01	8813.61	8130.03	8805.4	8810.24
M519T193	518.698	192.914								24552.1	28832.5	22639.1	31373.8	29059.4	27665.3	22050.2	21728.4	27857.4	23029.4	27959.6	25226.6	21433.2	25609.9	24555.8	24588.6	27949.1
M749T138	748.522	137.868								86738	90084.5	103325	101513	94550.3	72057.5	83005.8	105481	123058	54298.4	106918	92645.7	89872.6	94496	94676	94678.8	93303.7
M849T39_2	848.646	38.624								22824.1	29285	16962.2	21378.1	26125	37366.1	26763.8	34318.5	27943.4	28749.3	28551.8	20337.8	16489.3	28530.6	25719.6	29365.8	29323.4
M855T341_1	854.995	341.415								99094.4	129672	101509	138906	107112	131115	127725	92465.1	127623	97355.1	119291	121878	79286.3	116134	116155	118172	118154
M765T41	764.595	40.7615								35716.7	38143.1	31893.7	37652.5	32515.7	40261.5	30722.3	28510.1	47747.8	35099.1	56221.9	24934.9	43453.3	42626.5	43583.7	39780.3	43610.2
M756T40_2	756.169	40.1245								47067.3	47708.3	40440.9	51307.6	49668.7	56123.6	55767.8	40641	50750.3	42692.5	71219	52576.7	46693.9	52001.9	51995.6	52794.7	53368.7
M353T448	353.024	447.774								90054.8	74269.6	79259.4	143781	81302.8	76957.8	69397.5	79256.2	71159.8	80085.4	73986.7	65445.7	78043.6	69791.3	69784.4	69001.8	66503.5
M837T62	836.606	62.36								160150	87636.8	99042	123722	152092	228584	140914	101603	129667	123290	156781	147527	77612.9	127783	158044	137511	125137
M829T157	828.546	157.302								22052.5	29296.3	25846.9	21955.3	27522.7	30382.8	24913.5	23578.1	23525.1	24268.9	26033.6	23520.3	24939.6	32412	32284.8	32292.9	33641
M726T179	725.552	179.468								52035.2	50521.1	39702	56061	40598.4	50214.7	53603.7	47268.3	50649.7	56943.6	56616.8	47864.8	54887.8	52954.6	53463.5	53461.3	50124.2
M818T144	817.642	144.306								24578.5	18014.9	25253.8	17101.7	29719.6	12412	15427.8	16574.8	30772.4	27991.4	17152.3	24672.9	27366.8	24991.1	18137.5	15785.5	19916
M830T145	829.611	144.922								15769.8	14381.3	20277.4	6180.72	18829.7	23222.1	6433.89	13694.6	7495.79	5886.87	5895.62	13754.2	24440.6	11182.9	10431.7	10368	11223.1
M805T172_1	804.604	171.506								25513.7	34668.6	42179.2	24839.1	30866.3	53635	33384.7	24845.7	28658.4	39543.4	32360.4	21093.2	25062.7	32678.2	31908.5	32679.3	32392.2
M826T341_1	825.975	341.453								127404	153926	130247	149865	141586	162158	156057	128886	147896	131250	153214	148079	119610	140920	144746	147043	143501
M256T35_2	256.262	34.676								5632.62	5201.87	7160.87	9994.3	5404.19	3991.9	4997.02	3733.78	3235.24	6108.85	14362.8	6514.44	2116.87	8379.39	9530.41	9531.37	9330.34
M355T34_2	355.336	34.154								15236.1	20233.4	13546.4	15230.9	855.428	1245.06	899.328	1487.12	2042.89	1011.94	3885.19	19627.6	2085.41	22975.8	22940.6	22924.6	7772.63
M745T40	744.583	39.86								44116.5	55721.5	53658.4	46529.1	58967.1	46204.4	31244	68449.2	25151.5	40774.6	83501.2	60537.1	48982.6	57330.6	54792.2	19255.5	57509.8
M263T35_1	263.089	35.452								19898	2310.02	1948.16	2642.63	10150.8	7800.37	7540.36	11177.6	13192.7	12451.1	31120.6	12801.7	13029.2	9745.25	3712.14	9618.45	9623.39
M385T35_2	385.271	34.787								7085.33	5853.91	7411.47	6544	6418	32134.1	5405.04	4798.7	6091.18	1301.86	12276.6	7305.43	6861.41	7998.76	8260.84	8688.88	8692.45
M357T35_2	357.298	34.8015								9941.37	12998.5	8898.34	10769.4	11016	8303.31	11317.6	7434.24	6986.59	11916.7	16211.9	12157	12889.4	10961.1	10956.8	10769.7	10660.1
M771T39	770.593	39.185								45575.2	51125.4	30590.5	36265.8	55231.4	53619.2	36147.9	38633.2	36490.8	46457.6	47381.9	39260.9	42544.8	42618.9	43093.2	43105.1	41408.8
M470T34	470.199	34.132								7638.67	6670.36	5763.29	2459.9	10544.3	11303.5	5089.98	4893.72	10488.6	4673.81	6110.51	7651.85	8041.5	11904.8	13722.9	15439.1	15612.1
M781T101	780.549	101.252								136984	122795	88591.5	98088.2	187760	185445	127183	112602	112641	128726	142135	133828	142745	122128	121012	161784	122396
M1195T341_1	1194.99	341.426								83763	108422	88751.4	114183	91709.3	109133	112367	80175	110386	91264.2	105073	99214	75522.5	100697	100018	104481	100020
M337T420	337.048	420.07								82386.5	76124.1	81859.5	85752.4	74677.8	78864.6	73466.5	74441.1	74132.8	73856.7	77436.1	75768.7	74872.1	75279.3	75281.7	75282.7	71385.1
M331T35	331.282	35.452								2381.65	2713.83	1654.98	2454.22	4145.72	1034	6021.84	4628.63	3407.47	4698.28	4693.89	3508.89	2548.52	23440.8	23634.7	23647	21952.7
M730T154	729.585	153.774								81965	167396	69635	157566	96653	160921	161221	57787.6	142411	80581.1	172910	133913	65228.3	137140	134288	141836	141772
M746T178	745.616	177.698								110493	48765.3	58791.4	40875	49642.4	53774.9	49834	60658.8	60692.3	81448.8	52987.1	70353.6	65925.1	44352.7	53100.3	44927.6	43189
M340T348	340.044	347.86								70371	60205.6	50506.7	66598.4	51841.8	61215.4	67314.9	59055.4	59545.7	50683.3	65854.4	55462.8	53352.2	62583.6	61363.1	61361.7	61674.4
M991T34	990.778	34.1365								9537.17	9479.18	18704.5	6345.34	12841.2	3070.18	10065.9	11246.7	11082.1	2319.27	8461.69	7009.61	10100.3	8364.38	8250	8351.97	6990.77
M363T26	363.229	26.429								32467.1	29600.2	25038.4	10198.8	20783.8	21629.7	34454.7	22139.2	6521.4	28306.4	36852.6	33886.5	39374.1	27648.5	27764.4	27652.1	28435
M368T180	368.277	179.953								25248.1	19095.5	12114.7	25585.7	19081.6	30009.5	24337.7	21270.7	16133.3	21866.3	12555.1	17577.7	17194.3	19289.2	20560.2	20640.3	20075
M840T139	839.629	139.081								56295.6	70275.8	75210.3	65137.4	70102	53734.4	67070.7	83844.7	72639.7	52555.9	67615.2	58019.7	60976.9	66627.5	67067.3	68172.8	64707.9
M893T32	892.733	31.705								52588.5	12423.6	22990.5	15304.6	16701.2	13524.7	22272.3	24432	5227.34	15535.3	13837.8	8126.65	47581.6	6248.08	5097.66	5571.81	5079.11
M777T41	776.556	41.072								53050.8	77057.3	72577.9	92514.7	69464.9	60921.4	54470.7	53886.9	66367.8	46761.8	63932.7	47114.5	74148.9	61466.7	63320.5	59061.5	59144.3
M689T35	688.514	35.1165								2251.24	5223.5	3342.49	3396.64	3893.32	2640.58	2353.5	1884.95	4124.71	2564.19	3632.57	1195.9	2055.13	3884.37	3883.86	2246.25	3906.19
M753T137	752.554	137.268								113803	121490	111421	127286	123283	80025.4	102294	118717	141836	81124.9	103795	112446	112078	106666	106676	106680	100831
M220T281	220.141	281.347								3892.5	8733.26	8341.8	400.996	2701.09	198.565	8382.3	252.507	10847	358.361	11314.6	426.48	3970.38	3215.44	1010.33	1184.65	1239.84
M173T257	173.079	257.329								15375	10276.8	14296.8	37676.3	12667.2	10637.9	6604.8	10702.4	20506.4	11261.9	13021.9	14914.9	15014.2	15029.1	15169.6	15030.8	15509.5
M144T274	144.101	273.747								34771.1	50774.2	46459.6	46275.6	44856.9	43333.8	53299.5	32437	79631.1	24195.8	38757.6	23536.5	30604.3	37582.2	37584.7	38073.5	39583.5
M498T343	497.964	342.633								162674	183642	175665	125445	185770	199148	209194	177545	189547	182256	187432	182933	170774	185630	186764	186821	186856
M623T196	623.498	195.988								5948.35	13874.2	4389.91	10368	8878.1	15409	11935.6	5918.98	11737	5905.3	13969.3	8786.51	5141.52	14259.1	13142.3	12378.6	12339.5
M917T32	916.733	31.565								47959.6	13993.7	21021.9	12941.5	15700.4	15446.6	26942.8	24955.7	6930.22	21578.8	10223	9964.32	38552.7	8751.65	9981.11	9130.65	8746.53
M403T35_2	403.281	34.704								8810.92	12232.3	5008.42	5601.59	10272.9	4754.82	7369.81	4728.44	3833.53	8081.41	14685.1	6574.37	7680.76	7976.24	8442.1	7618.62	7947.6
M791T144_1	790.535	143.969								11439	16498.9	13133.8	10331.7	11004.5	16347	15475.1	8087.55	11720.5	11990.6	10518	10285.6	17980.4	12755.1	13185.3	14985.2	12155.5
M978T196	977.653	195.828								20861.3	17821.9	24162.4	15382.3	30212.3	17317.6	20839.4	19266.8	17480	22071.1	12346.6	25383.1	10150	15573.4	23252.1	19541.7	21089.8
M482T35	482.401	35.1175								8384.66	6878.07	11308.8	4869.01	10775.3	5385.21	10584.7	8263.85	3289.01	4693.37	22526.4	5841.68	6694.44	8441.84	8625.64	8640.86	7559.68
M285T336	284.97	335.805								101943	107637	93905.6	77933	67260.3	116863	88970.1	82680.1	85781.9	92549	78856.4	91748.1	83907.2	84199.9	80722.3	84975.4	84971
M584T34_4	584.468	34.176								10290	4709.07	3207.87	6189.9	10432.8	4028.31	9052.2	2687.77	9541.94	2945.1	8004.16	5623.41	7178.45	7646.55	9820.46	7698.42	8118.25
M352T50	352.246	49.6315								20449.8	16730.5	23067.7	18789	24885.1	2629.03	19724.7	23652.5	14745.2	6765.28	16290.9	17210.7	20579.9	19190.6	18809	19397.1	17608.1
M843T156	842.622	156.164								6909.94	10976	8883.62	12075.7	11691.8	10721.1	10325.2	13876.8	12455.8	8430.72	25828.2	9270.23	13825.2	12439	11895.2	11929.1	13768.7
M614T196	613.514	195.973								5551.2	17439.3	10886.3	15415.6	11300	9521.9	12915.1	4726.07	15118.1	7328.88	10212.7	9501.4	5337.74	14054.7	11881	12667.4	11826.2
M194T303	193.997	302.882								70155.4	100776	77385.9	82447.9	105249	63709.1	88525.1	80166	73672.8	61998.5	91596.8	83008.1	71327.1	88076.5	86842.9	86842	87131.8
M221T95	221.152	95.115								87448	72589.3	73454.8	76121.2	65201.1	47122.2	84668.9	52259.1	47072	43086.1	46244.2	57589.9	64015.2	78471.2	73980.7	78474.3	76709.1
M145T345	144.983	344.69								221197	144434	216533	151355	142880	249660	255216	218931	248749	235160	242723	230358	228643	236358	237978	228449	240656
M861T39	860.61	38.564								8921.96	11079.6	15209.4	11310.1	15584	23960.1	10732.2	12304.7	13340.4	12271.1	8620.82	11971.2	13126.9	13274.7	14426.7	12359.7	12407.6
M908T341_1	907.978	341.445								89598.8	116552	93130.1	119837	103089	116999	117943	89266.8	116132	93069	112381	112640	93425	109716	107230	109692	108989
M618T33	618.473	32.75								6867.27	8502.26	18199.8	11090.7	20860.9	8742.01	8901.63	13404.1	20064	6384.42	7691.83	5267.26	7457.47	9685.26	10916.7	11789.7	10551.8
M386T49	386.267	49.083								11698.2	15100.6	17734.8	15707	16986.4	1618.4	16348.2	17504.4	11251.8	4746.88	13009.1	14025.6	13228.7	14436.5	14563.7	14565.5	14157.1
M100T20	100.074	20.186								10678	21432.1	20661.5	9744.96	5887.43	7764.17	14987.3	8557.27	11032.3	18229.2	10728.2	19368	15547.7	17199.9	12710.5	12764.3	12738.5
M810T85	809.582	84.703								61056.5	98048.9	74706.8	94321.5	99188.1	153230	83050.2	89001.2	70935.1	234486	143374	115299	102283	100826	93973.2	100699	98767.7
M243T257	243.052	257.087								13556.9	10631.7	4794.06	18301.1	5034	8329.43	8971.69	8390.91	7872.34	4209.28	12216.5	8584.15	2664.19	11993.1	10401.8	10485.3	11152.9
M1072T189	1071.65	188.594								2316.51	16713.3	12515.2	3399.43	3227.4	5995.47	2764.25	10280.6	12883.6	19054.4	2983.44	9058.44	1595.43	3490.85	7208.65	4296.25	4353.78
M788T32	788.473	32.367								11957.5	11656.3	8407	11639.7	6186.8	12450.2	6602.74	8592.21	9885.92	13957.1	11679.8	8082.08	10569.1	9732.26	9716.71	10405.3	12077.7
M235T585	235.091	584.514								199245	537111	437782	92542.8	344356	249955	200832	154151	471494	253956	214952	432309	242042	408640	387638	290446	410125
M903T32_2	902.736	32.094								6363.45	13868.9	7537.17	3559.75	2543.02	4818.84	4094.51	6570.41	4831.05	1291.21	8262.81	3867.37	5309.01	5172.8	4859.79	4417.9	3837.49
M972T32	971.781	31.726								32525.7	6417.52	68913.5	12760.8	27582.6	12993.1	21472.6	35971.2	4941.2	7914.47	8830.99	5173.58	26522.8	5425.78	6010.48	5998.6	2684.94
M333T101	333.204	100.583								58088.9	31935.1	38489	87330.1	32402.1	38294.4	39241.8	28974	62902.6	20092.4	42421.3	21445.3	17693.6	33279.1	33693.1	33273	35345
M618T32	617.51	32.182								16031.3	15118.9	13812.5	17808.1	14146.5	14831.4	18828.7	11696.2	9153.79	15621.6	29082.4	19739.1	23525.7	14934.6	15196.9	15207.2	14296.6
M765T147	764.598	147.007								62012.5	52865	64796.1	66555.1	61050.9	53217	51306.9	74244.4	58838.7	56837.6	59143.1	65526.9	74234.2	52634.7	54394.9	53219.9	52629.4
M792T40_2	791.621	40.4785								28442.3	23830.4	20203.1	22297.9	20491.9	41877.5	27391.1	20467.6	34974.2	20354.8	35498.9	32123.8	24811.9	23374.9	20348.6	23397.5	22596.5
M855T142	854.623	142.145								14252.2	13500	29073.7	5458.63	4927.44	4195.09	6954.14	15699.2	6703.03	18945.8	3500.34	27940.3	8709.46	7717.78	7841.83	11585	11016.6
M543T189	542.621	189.262								14397.7	20334.4	16501	19107.4	18371	17694	17323.1	13210.9	19586.5	21478.9	18856	18267.3	15233.4	16504.7	16406.3	17532.4	18187.8
M448T384	448.14	383.522								43511.6	46719.4	33559.9	42211.9	50247.5	45649.4	47637.5	33464.1	38732.7	33463.8	42424.6	38055.9	32578.6	39667.9	40527	39896	40216.1
M802T343	801.967	343.143								4941.97	42164.5	3842.22	39782.1	3596.39	4542.44	6100.72	7539.08	5112.25	6187.51	2027.71	10081.1	4987.41	5614.5	14413.1	5143.24	5816.83
M816T138_2	815.57	137.881								6881.36	49554.9	6943.76	7795.81	11846.6	3069.73	3088.36	8808.84	3436.41	4364.78	11674.1	5807.42	45911	24707.9	35779.8	39634.7	27389.2
M568T34_3	568.423	33.614								6722.19	5978.37	10082.9	6011.45	10988.5	5867.26	6571.33	8140.16	9388.64	2430.73	8189.66	4233	6191.96	9452.2	9469.15	7099.23	9471.43
M1032T192	1031.7	191.708								15216.5	17192	14211	20637.7	15412.6	18147	12026.3	19917.2	20223.9	16045.4	24031.8	19578.3	15600.3	20507.1	20140.6	18723.2	20496.7
M690T159	689.554	159.276								46564.2	91207.6	49327.8	102987	57269.4	95295.7	94644.6	42200.6	115124	43971	97096.2	82596.3	35236.7	102267	102358	106899	107057
M817T38	816.586	38.44								18991.5	24244.3	9924.26	17993.8	16812.6	26639.2	11129.1	15290.9	14026.2	11113.3	11659.5	10025.1	10408.9	21426.8	21443.4	21411.4	19927.9
M379T34	379.149	34.067								11463.9	9989.34	7463.92	9329.84	7721.29	14562.8	6497.06	7688.67	7710.8	19428.7	8940.1	9790.37	8934.77	10579.1	10477.8	10580.9	10271.1
M1062T190	1061.74	189.856								21516.2	23448	20733.7	20388.1	16193	21221.1	19952.9	23303.9	31088.6	27054.3	26563.4	29028.7	14360.2	29536.1	28170.9	29538.1	29536.4
M476T200	476.272	200.331								32454.5	34774.8	27764.6	27684.6	28136.7	35709.3	36978.8	24705.5	32106.2	33977	42263.6	34233.5	31077.3	32229.2	31353.1	32380.6	32378.6
M823T307	822.774	306.648								46809.4	41388	33270.6	27137	20240.8	25736.6	35826.5	22844.3	32644.2	25599.7	33028.6	51823	23299.4	44036.7	43345.6	43384.6	45342.2
M408T35_2	408.366	34.802								6319.35	6183.01	4213.13	4415.27	2904.97	4519.11	2776.05	5773	3219.42	2635.63	2550.22	4661.28	12435.8	3438.12	3611.34	3431.22	3950.87
M767T145	766.53	145.198								36552.8	31576.5	19056.9	26018.9	21065.5	22884.2	30613.1	21366.8	27468	37279.8	30134.1	26221.1	42602.8	25576.3	25881.1	22847.4	24564.6
M629T456	629.147	456.445								14040	11141	12244.4	2027.6	13321.5	12379	12485.2	13722.4	10614.6	15933.7	12867.3	13646.4	13344.9	13558.2	13583.9	16426.3	13737.4
M1038T192	1037.65	192.341								31247.8	33911.5	21339.6	25549.8	28797.7	27390.9	31954.3	22753.9	24280.1	28395.6	36942	35115.9	33068.2	30062.8	32981	32956.2	32680.9
M853T200	852.556	199.735								15985.4	18520.7	20286.8	16009.8	17394.5	15001.8	18521	13279.2	19375.1	14173.8	19940.2	13589.3	14206.5	18084.4	17661.2	18090.2	17866.1
M853T203	852.638	202.986								6223.55	581.837	469.176	4454.16	4764.6	4388.32	489.838	4286.84	4557.46	696.157	416.38	666.129	765.658	1177.84	1207.5	1182.49	2147.68
M568T341_3	568.488	341.426								92580	115048	97336.5	119220	104334	125405	123406	89558.1	114739	93818.2	110781	107930	90093.8	110689	110687	112244	111765
M496T33_1	496.258	32.884								7050.94	455.931	2454.73	1855.37	2573.18	16837.2	8954.71	10783.4	17230.7	16338.7	11985.9	3208	4203.09	10343.4	10809.7	7903.33	10821.4
M861T137	860.61	137.266								36727.8	40624	47100	38155.4	42096.7	34151.8	39105.9	49363.6	41264.4	29379.6	39908.9	35672.8	37238.1	43046.6	44766.6	41483.5	44177.2
M508T193	508.336	192.922								29828.3	24648.7	32418.6	30754.4	31912.6	32375.2	38453.5	50266	42609.2	31174.8	39157.2	30462.7	39279.3	30550.3	26708.3	30535.7	29217
M508T195_1	508.279	195.357								14975.4	4972.66	1918.7	4764.32	16479.4	11519.5	5205.4	23276.8	4018.12	14797	3997.34	2403.14	2538.81	4659.71	9530.97	4960.52	4934.68
M884T341	884.016	341.403								64051.6	93406.1	70173	98598.2	73742	94613.1	94588.2	56120.2	97362.4	67238.1	88938	76792.7	55378.7	84365.4	79978.8	85936.6	83351.2
M884T343_2	883.969	343.079								78557.1	6508.04	12862.8	123361	7429.04	6440.05	96837.4	11104.1	116782	12934.9	15198.4	12150.7	18268.7	17219.7	83331	82734.8	82989.2
M949T32	948.791	32.367								29239	7266.91	60942.8	10384.5	27270.6	9237.91	15620.6	35847.4	2852.66	6706.17	5262.9	3444.11	37735.4	2041.66	2898.24	2247.86	1945.7
M667T307	666.757	307.318								63009.2	60118.9	51226.3	40581.2	42237.1	45083.7	63222.8	39846.3	47986.8	54189.6	56137.1	72311.8	48143.9	63987.7	66391.1	65683.7	66302.2
M773T84	772.581	83.979								41421.8	54108.7	45073.9	52946.4	80757.4	62909.1	59296.6	42668.1	68168.1	50036.4	62616.6	48710.9	106891	57184.5	56006.1	76648.7	54447.2
M300T301	299.909	300.887								26727.5	17800.5	15654.8	16073.3	4648.77	6492.82	14632.8	13505.4	15696.3	4194.16	16486.8	15280.7	7929.98	16663.9	15696.5	15860.4	15625.4
M891T343	890.937	342.791								153303	167691	99756.2	92149.1	168408	88730.5	102009	163382	93415	166135	114520	205526	159898	129263	140235	129385	138921
M706T146	706.46	146.397								4799.97	26924.4	4627.42	24238.2	25337.9	3065.1	3704.2	3542.26	29595.7	2267.82	2303.71	4769.42	2979.65	5898.81	5633.46	15140.6	5922.02
M1022T194	1021.62	194.148								12483.4	19367.2	12801.8	20626	12923	18611.5	21377.3	16401.9	10742.7	18715.4	22384.2	12076.4	11198.8	13612.6	15708.2	15709.4	15736.9
M933T196	932.616	195.964								10170.9	17608.3	12756.5	15800.8	12767.3	17700.6	17742.1	5312.05	13195.4	11387.3	12686	11761.3	7732.15	17503.5	15805	15834.9	16237.5
M356T35_1	356.187	34.679								1460.5	918.279	1011.56	17650	1261.45	1009.85	547.349	1621.4	2116.19	998.7	3259.66	1495.15	1677.46	1651.79	1425.36	1428.3	1429.07
M581T35	581.236	34.916								7595.01	4548.81	7158.71	7428.04	13471.7	6340.56	12391.2	10484	5193.88	6186.41	8000.12	8348.47	12166.5	8706.12	8866.45	8719.5	9453.14
M204T130	204.103	130.473								4730.82	18791.1	5514.16	5798.59	2514.32	1258.91	3314.79	7552.92	6307.94	704.253	8178.13	7490.4	2542.47	13737.9	13199.2	13737.2	13738
M111T35_1	111.043	34.77								18673	11149.7	11124.6	14234.2	12845.9	20819.2	27841.5	23107.5	22735.5	20307.9	17247.9	11647.6	14008.5	14122.3	14739.1	15025.9	15020.8
M228T35_2	228.194	34.834								1270.97	771.489	5849.35	4757.3	2836.94	4628.65	9163.28	6530.97	3211.15	5810.3	8874.47	7800.77	2970.76	20027.3	21261.8	20027.6	20435.7
M353T461	353.025	461.448								17435.5	42850.7	35783.9	64945.6	41717.4	34308.2	25798.6	45420.8	23918.8	30596.4	49125.8	45305.1	41216.3	29046.6	32071.2	35934.9	29472.1
M674T345	673.95	344.614								61864.7	73387.8	68363.2	118327	73172.6	134359	69996.3	116137	71719.5	9496.5	72517.7	68092.2	109042	79402.8	95470.4	79452	79351.7
M349T55	349.235	55.3775								7212.6	14310.1	4149.64	20822.4	9906.22	4258.96	7999.33	24937	20819.4	627.712	3774.83	1146.63	2084.12	15153.6	15282	15153.7	15634
M189T409	189.086	408.905								100644	133949	87767.6	29079.6	110369	105770	129985	113840	122535	116530	129300	132280	123372	124840	124875	125098	130051
M720T341	720.011	341.403								59957.9	85593	64972.8	96235.7	68921.6	84202.2	86115.9	55497.3	87716.6	61446.8	80590.1	71486.5	53578.7	73485.1	73489.8	74510.5	74641.8
M989T194	988.529	194.142								11901.9	17317.2	12984.3	14154.9	11422.8	15804	15750.3	11988.7	12158.1	10441.1	14689.9	11254.4	12652.4	15783.3	14309.5	16112.4	16134.3
M973T343	972.941	342.608								64829.4	73433.1	115193	78343	128323	133557	139356	121757	127110	129174	68472.2	126706	128024	87386	125461	125317	122951
M294T453_4	293.916	453.032								7794.71	9190.31	6671.35	4381.79	10463.6	8414.42	12624.1	10668.4	16275.4	17549.5	6000.24	14142.7	10644.8	8100.01	8551	9755.03	9761.44
M71T271	71.0595	270.813								48172.7	58883.8	54847.6	50396.3	48566.2	65977	84616.5	42413.4	53423.4	77514	42836.9	76616.3	59234.5	69348.1	68035.1	70012.6	73499.8
M480T203	480.274	203.489								4103.34	46173.5	27293	15968.5	33098.1	34497.3	16668.1	11383.6	5846.5	18611.9	13201.8	13240.8	27504.8	14622.9	14567	14930.6	14723.5
M104T385	104.106	385.354								35409.9	47015.9	29810.7	40983.3	45145.6	39096.6	60355	40738.3	41848.5	47228.8	44282.6	41514.8	33728.8	41068	40586.6	39203.7	41469.5
M1004T195	1003.7	194.745								20155.4	22939.4	21431	23989.3	26284	22212.1	18612.2	28225	19022.6	18303.9	20771	21445	24070.2	20714	20761.6	20754.6	23447.8
M794T143	793.553	143.357								17828.9	19272.6	20232.8	16919.6	11050.9	24073.3	18452.5	16831.9	19839.8	18678.3	16419.3	15312	27049.4	16994.3	16793.4	21579.6	16992.1
M634T329_1	633.822	328.945								8629.67	8868.25	9678.25	3992.1	3267.68	4688.81	7054	4827.37	5790.47	14035.1	10140.4	7666.28	4437.37	8383.6	8310.71	8310.9	8645.1
M937T341_1	936.999	341.403								66044.2	89454.2	66432.5	103471	77033.1	98299.2	90582.3	62198.9	85361.1	68013.6	89922.9	80319.4	57804.8	82351.2	82347.1	85596.9	82433.7
M987T34	986.752	33.9015								11731.7	12225.9	15196.6	8616.43	12854.7	1342.78	8243.78	10374.9	13510.9	765.273	10914	10934.1	13387.4	10780.3	10781.1	10781.3	10375
M636T33_1	635.538	32.778								20889.1	14633.7	2335.42	18047.1	23027.4	15309.7	26008.2	15691.4	20828.9	13800.1	27997.2	25429.4	25771.8	22986.1	20069.8	20591.6	20026
M849T40	848.551	39.725								18509.8	13284.9	16221.5	13557.2	10565.1	22602.2	10968.2	27540.2	15913.7	20082.3	21047.8	12574	14278.8	10906.7	12765	10995.2	12163.1
M481T332	480.854	331.857								1024.37	40087.3	39875.8	44000.5	873.559	820.702	649.427	921.048	756.037	836.675	615.547	872.677	28262.1	36285.1	2381.27	36132	36221.4
M765T39	764.519	39.231								60998.7	54556.9	47563.6	57077.8	29739	87453	50363.5	31580.5	55919	62420.8	101612	47100.6	54540.8	53278.1	46352.3	53125.6	53321.7
M179T305	178.949	305.094								1081.14	1521.69	1185.73	1421.49	918.185	1657.07	1356.07	1168.35	2263.88	148928	987.291	129810	893.822	1419.83	1367.08	1468.49	1468.24
M218T324	218.137	323.786								37206.3	28403.1	54431	41919	49806.2	48783.4	34763.6	42072.2	49605.6	24827.7	60760.4	51252.2	45799.9	40988.4	40989.9	41315.8	41311.7
M177T583	177.086	583.324								328027	262912	57498.5	195520	192565	350871	305526	225521	139232	211773	233157	207089	217674	241921	241526	334227	240599
M271T234	271.073	234.117								10093	11929.8	14755.2	11688.8	11954.4	23682.7	35616.7	24644.9	15541.2	10566.2	17925.5	11384.7	8499.77	19893.1	21654.2	21080.1	21688.1
M189T404	189.121	403.932								1800.62	1488.07	934.863	1478.02	2324.55	71841.6	1672.95	77181.7	81225.7	1194.59	1731.04	4142.68	2744.81	1971.03	2371.57	2259.4	2423.95
M498T203	498.286	203.028								13452.9	29132.8	19117.8	12307.4	23150.4	23553.2	13279.5	7193.39	28842.7	12011.9	9621.12	8447.75	22631.8	9292.52	9292.93	9434.71	9389.79
M755T141	754.568	140.946								62496.1	80009.3	71954.4	71434.1	67600.4	55031.1	78518.6	79784.6	80073.9	54949.3	95065.5	68046	70276.1	67492.9	67535.4	65709.1	63000.2
M219T34_1	219.055	34.188								2246.22	19592.7	1578.78	1655.71	1774.96	927.896	29484.3	1478.66	1463.82	1119.1	24522.5	965.843	1474.65	19195.1	19182.8	20187.6	19190.5
M566T189_1	566.319	189.248								28436.9	31232	30696.9	30254.2	37649.6	27996.9	29788.9	23293.9	25691.9	26084.8	30237.5	34311	25225.1	31786.3	31576.4	26128.9	31711.3
M795T36	795.331	36.094								11014.7	3694.2	3645.15	6866.75	3922.23	11237.2	3001.29	3425.73	6190.24	17600.7	4203.98	6077.11	5462.89	4894.22	5424.66	5240.03	5237.34
M448T168	448.339	168.477								28675.3	31322.6	23221.2	39267.3	29535.5	49085.7	30906.9	34840.3	34428.8	36114.1	22324.7	21964.7	21956.4	30596.1	30750.7	30751.6	30266.5
M845T33_2	844.731	32.822								25481.3	4783.04	19370	8366.94	9331.47	6934.98	13537	18473.2	2648.78	8350.82	5759.75	2385.89	44723.2	2220.16	1290.02	1819.07	2016.96
M102T636	102.127	635.701								113535	80633.3	55193.2	46019.3	92078.5	111695	62568.4	101504	69353.1	100619	203987	137367	56209.2	104762	104575	66384.1	104791
M309T33	309.202	32.94								3154	1983.3	10477.1	2988.44	5397.02	5203.42	2217.1	3225.16	3754	7023.47	1725.46	3471.24	2827.4	2651.6	1867.72	2398.82	3218.93
M536T190	536.366	189.83								26617.8	31052.1	30486.4	32721	26837.4	34404.1	31895.2	30532.7	30595.9	26302.4	29173.8	29380.5	24270.9	27075.3	27079.9	27082.6	29733.6
M847T39	846.63	38.619								11785.8	12426.1	17096.4	14691.9	14594.5	24422.8	15809.7	14805.8	12135.8	11957.1	13356.6	10856.8	9757.99	15437.2	16254.2	16560.5	16552.9
M633T345	632.949	344.821								68692.9	116245	62771.3	116784	66563.6	69408.7	80964.2	109679	69068.5	115909	66602.3	114682	111716	78281.6	78256.4	78190.1	88841.1
M386T36	385.962	36.1545								9588.53	6476.02	8215.26	9430.88	6964.94	5826.34	6905.62	7201.69	9767.72	7424.45	9661.24	11154.3	10076	8827.3	8617.11	9574.79	9432.55
M650T341_2	650.49	341.433								72143.8	100172	76018.2	98417.5	85843.3	103289	97053	76152.9	93804	81671.5	94995	86700.4	71595.7	88332	87625.3	88911.8	87822.8
M540T206	540.363	206.231								17996	27581.8	23423.8	18598.6	18969	26098.1	19158.5	17540.2	23850.5	21384.3	25232.5	22811.6	17648.5	28498.3	24470.3	24596.4	24515.6
M551T345	550.946	345.499								80822.3	93700.5	86278.3	89230.1	93358.9	159106	161095	135252	88694.7	150530	152034	93041.3	146206	144827	146028	146174	78742.3
M715T344	714.952	344.151								66121.7	76520.1	114567	65624.9	125765	74914.9	70730.4	119111	74884.8	114612	68242.2	113688	118426	69982.6	69950.6	77682.4	70926
M514T33	514.277	33.384								19836.8	10722	10604.7	17637	11237.5	12123.3	8686.45	9416.18	13738.2	7959.3	10174.5	9681	15977.2	8976.72	9233.97	10196.2	8934.04
M647T34_1	646.608	34.084								10570.6	10858.3	12529.7	11106.9	11140.4	10053.1	12844.7	9173.21	11815.7	11352.5	13969.1	11601.7	17453.1	9958.01	9976.14	9529.63	9491.84
M833T66	832.578	66.313								47910.5	198323	45831	82434.5	87129.3	86863.9	151939	69664.6	71911.7	122827	144369	83614.3	118652	77355.2	85041.2	88042.9	87937.7
M567T33	567.413	33.3805								1918.29	1150.66	2251.46	1625.49	1626.36	910.77	1108.29	1330.63	2842.27	912.691	1466.9	1271.32	517.613	3221.56	3380.63	3444.35	3446.2
M239T68	239.148	67.516								24464.5	25082.2	28895.8	20528	19594.7	35915.6	27354.4	40807.6	29008.1	15156.1	33234	22312	22915.7	27406.5	27944.5	28964.4	29870.1
M337T408	337.141	408.033								32754.4	28880.1	36073.1	66983.8	22747.8	25213.6	24858.7	26026.5	31169.9	26231.8	27476.6	24841.2	26078	29515.5	29525	29525.5	25865.4
M749T39	748.524	38.634								24404.9	45513.1	40391.4	41049.8	49914.1	80074.1	39851	39572	47123.1	44871	42739.3	38090.2	49916.4	40138.3	39503.5	37107	40148.4
M251T350	250.947	350.482								145113	151806	199941	196074	202302	152734	227643	199842	241704	154029	209473	156555	166755	165439	174333	174185	165915
M978T341	977.999	341.426								60752.1	83443.3	61988	86872.4	71066.9	82785.6	83290.6	54797.6	81278.3	58409.3	79549.9	75029	52498.6	75868.3	77462.1	77525.2	78134
M609T341_2	609.489	341.452								72987.3	93415.7	78935.3	96239.8	81725.7	103695	94694.9	70463.8	88973.8	73650.7	86295.3	85214.8	71221.2	85558.2	85564.1	85573.2	89012
M239T95	239.162	95.2295								66008.4	57218.3	58884.1	59208.3	51721.4	32568.2	64951.3	43990.2	42310.8	31454.6	42136.5	46545	48350.8	54195	56848.9	59256.1	55651.3
M269T448	269.043	448.091								33565.7	32346.8	31236.5	40431	30345.7	23522.8	30372	30043.8	33799	30719.9	28636.8	27622	26658.1	28525.6	30115.9	29661.1	29376.3
M794T384	794.294	384.123								7956.3	23022.5	6946.7	18955	21809.4	13095	31530	12582.8	15234.8	16691.5	17211	14454.6	7906.11	12701.8	12210.5	12207.5	12210.4
M431T34_2	431.26	34.1085								3228.19	2337.72	3578.68	2983.98	2076.36	1957.05	2749.27	2840.86	6701.44	3158.25	1385.45	2126.27	3750.43	2535.17	1490.97	2498.11	2549.82
M1031T193	1030.68	192.902								12976	12775.6	15006.3	12013.9	15384.2	13857.9	13587.5	15472.2	16586.1	14207.5	16586.5	16343.5	16499.8	14619.9	18490.4	14536.3	15319.8
M701T180_1	701.347	180.077								19856	26487	21651.5	20942.4	21621.5	24701.4	21258	20496.2	17695.5	29919.6	26835.1	23502.7	21709.1	23270.6	21178.1	23758.1	22403.2
M548T27	548.382	27.183								4943.19	5187.02	4056.22	4926.4	5490.39	5610.82	5739.77	5989.56	6042.78	3693.48	7337.49	6582.01	4329.7	7730.44	6816.28	6072.98	6134.84
M652T329	652.299	328.7								9103.08	9466.59	11008	3291.52	3893.93	5343.23	10612.7	5335.81	6180.52	17737.1	10879.2	9462.11	5408.08	10846.6	10672.9	11021.2	11105.4
M554T32	554.369	32.144								19434.5	17270	14499.2	18951.9	17483.3	21385.7	14912.5	18907.2	17450.6	21083.7	14402	23463.8	22573.4	19710.7	19064.3	19089.7	20681.1
M845T448	845.072	447.795								15338.4	17451.5	17559.2	13755.7	14721.7	14830.4	12875.9	16705.7	13598.6	14032.8	15400.9	15688.2	20248.2	16651.5	17642	17573	16675.7
M384T33_2	384.333	33.3825								3519.53	8626.62	3580.22	4949.96	6315.39	3793.6	4138.51	2610.52	4102.51	3882.6	3678.84	2962.54	3991.2	7765.83	7923.09	7841.6	7767.02
M468T202	468.34	201.629								4748.35	8783.29	5726.7	6351.46	7246.53	7670.75	6808.99	3526.43	15804.3	5193.09	5470.47	4984.14	11344.4	5982.02	4958.97	5723.16	6063.53
M720T342_1	719.965	342.034								18344.8	89888	25322.1	16524.8	76032.6	14918.3	25999.2	16101.3	26380.1	17931.5	19590	17721.5	17232	19853.2	19781.6	19875.5	12118
M608T33	607.503	33.367								11970.5	14832.5	11512.8	13841.3	21113.7	1877	16644.1	15200.1	17083.3	1567.05	17938.6	554.254	17512.4	17175.8	17180.2	17172.6	15845.4
M175T509	175.118	508.989								108919	123365	47750.1	62681	135008	61828.9	22651.3	54272	52258.5	29360.2	62870.6	48972.2	87892	52530.9	57617.2	66877.9	75462.4
M805T38	805.018	38.056								4666.52	7460.47	6751.98	8019.98	8437.88	12536.3	6524.65	6787.08	8739.24	9351.06	6626.51	4752.81	6582.93	7184.87	7183.54	7175.36	8051.02
M460T33	460.376	33.499								12698.5	12007.7	11967.5	13461.8	12997.2	12229.1	11970.8	10835.2	13934.5	8423.69	15466.3	12208.5	18697	13038.5	13381.7	13393.9	12538
M821T142_1	820.521	142.134								29801.5	36146.9	47058	33546.8	31657	32172.9	41395.5	29094.7	30741.4	29770.5	24516.8	20729.8	28076.1	30062.2	30560.9	30055.4	31664.1
M190T239	190.096	239.33								15590.7	28879.3	21704.3	37147.9	23677	10882.4	29429.9	28136.8	35425.9	12032.8	24390.1	22113.9	7232.36	26089.3	26706.9	27138.3	27122
M840T39	839.629	38.6445								20114.2	26366.1	25820.8	24686.3	27516.3	33378	21402.8	25244.8	34084	22577.8	25391.7	24215.7	24863.3	27676.5	28858.3	27675.7	27960.4
M471T308_1	470.804	308.069								81339.6	77402.4	69659.9	54008.6	61551.7	62206.5	81577.6	57902.2	64776.9	77194.8	73517.2	88491.8	67924.6	78319.4	83734.9	82330.8	83657.1
M373T308	372.827	308.29								82706.9	81127.2	71034.5	58184.7	66352.5	67125.7	84779.8	59613.1	67808.5	82266.8	78941.6	88298.4	71901.2	83096.8	83115.9	83187.2	85358.6
M324T214	324.076	213.908								125045	77484.3	107093	71629.2	112488	81406	71655	118728	87322.9	114205	79783.7	103704	92929.6	88304.4	88013.6	87441.5	87668.4
M1015T34	1014.78	34.067								12650.9	10771.5	17304.9	10731.3	14739.5	572.965	10431.5	10088.2	15461.6	1757.69	12815.8	9195.31	15285.9	8035.75	9308.69	7556.55	7575.47
M817T137	816.585	136.627								47468.7	41063.4	72627.6	44104.8	52876.5	37694.7	41046.2	46955.7	55306.7	25253.9	44025.4	32069.6	42672.5	50296.4	50297	52882.6	51119.6
M569T308	568.78	307.936								72124.9	66730.5	59352.9	45368.8	51442.3	50154.3	71860.8	48504.3	53870.3	69574.7	64047.7	77640.8	58181	69913.5	70918.7	70526.6	71077.4
M336T50_2	336.251	49.627								17453.7	17159.7	16356.7	16658.9	19895.7	932.588	20106.8	17848	9787.96	5253.32	12035.2	15944	18020.6	15110.2	16143.4	15315.5	15189.2
M780T142	780.093	141.546								24212.1	34056.7	43174.4	33055.5	41256	29963.4	34259.4	38291.3	34243.6	34849.2	38378.5	31505.8	25590.3	34118.7	37574.1	35840.6	35434.2
M732T341_3	732.493	341.439								62405.6	82122	67309.8	90528.6	70189.8	85963.1	84885.4	64325.2	82892.6	66424.4	85700.4	75886.4	60781.9	75085.6	74708.7	74708.6	76713.2
M512T211	512.332	211.391								28169.2	36101.9	33652	30259	30822.6	39859.1	33213.3	24121.5	33927.2	32969.6	38392.2	32405.8	27754.4	31873.5	32377.1	31881.6	33620.3
M398T34	398.239	34.092								8293.59	7468.99	11319.4	6851.85	6837.55	13509.7	7869.14	8105.44	7284.8	12012	6675.27	8565.85	13732.2	9104.69	9016.42	8462.72	8893.58
M765T307_1	764.734	307.211								50532.6	45814.3	37875.6	28688.5	30042	32585.6	44385.3	29543.9	36290.6	37243.5	39529.8	56166.5	33443.8	47998.8	49872.9	49133.5	49805.2
M219T33_2	219.209	32.772								640.998	1434.83	1612.11	13225.2	447.783	931.925	13312.1	490.959	21658.9	884.785	13233.4	915.381	1175.39	15252.4	15504.7	15388.7	14946.7
M755T147	754.533	147.008								25633.9	20936.6	19680.5	18228.4	23584	19497.5	14165.2	25633.1	22921.1	26173.9	23043.9	20782.4	27046.9	25263.6	21685.9	25989	25886.2
M879T342_1	878.957	342.036								74626.4	50900.1	75447.1	87963.9	80637.8	54703.8	96863.7	75659	87590.1	87935.5	91365.7	84984.3	78325.8	82976.8	86339.3	85784.2	86276.2
M691T341_4	691.492	341.488								68788.8	88112.4	69571.7	91992.1	75137.1	90752.9	92736.9	64166.2	85403	66384.4	79395.2	76874.5	61902.3	81216.6	81217.7	82195.2	81234.2
M838T342_1	837.956	342.149								80652.8	65327.6	82184.3	97582.1	86321.9	100132	98944.7	88689.5	89432.4	90934.9	91442	86200.8	83500.9	67503.4	81239.2	76632.4	71240.3
M838T347_2	838.039	346.603								2207.15	1852.23	48165.8	49948.8	1890.4	2332.08	2030.93	1681.92	44298.6	52136.5	1941.61	1962.91	40656.3	1662.89	2163.65	2052.96	2152.54
M816T40	815.628	39.8575								25265.4	40780.2	35813	34248.1	32358.5	38716.5	38903.4	35165.8	37470.4	36445.9	34487.2	32720	28879.2	42812.6	40874.9	39446.5	41622.9
M189T455	189.086	454.516								23224.5	38550.2	33548	5013.12	39667.5	31442.8	35852.4	43370.4	43287.5	49500.8	61759.6	58941.4	48044	46376.5	49259.7	46534	54005.8
M606T184	606.445	183.775								18090.7	23041.2	20146.2	24124.5	18373.3	27254.2	21642.1	16984.5	23000	22381.2	24486.7	16443.3	18241.4	20511.5	20502.6	20505.5	23132.4
M690T32	689.51	32.264								2552.87	2857.43	3389.94	3038.52	3682.16	3840.13	2464.2	1630.44	2634.99	1494.06	4919.02	2443.4	3745.87	3339.35	2701.75	2711.38	2828.45
M966T341_1	966.018	341.403								50503.1	73135.3	52127.9	82302.3	54647.8	74384.9	75542.5	47871.8	71213.9	51930.6	66370.1	58588.9	42096.1	61889.4	59100.7	62650.3	61342.3
M990T341_1	989.981	341.426								64708.5	85636	68941.2	87867.8	74375.2	89132.9	84826.2	66047.3	82238.8	66934.8	80950.8	73924.2	63516.4	76176.9	79128.9	79112.4	79117.8
M839T161	838.505	160.621								6116.69	5147.15	6432.55	5416.14	5316.5	6206.03	7485.6	5569.6	5449.05	8563.35	6568.23	8309.64	7111.66	4700.8	3819.65	4708.16	5176.86
M784T145_3	784.109	145.177								32594.8	29126.7	21108.5	28779.9	51580.8	25704.8	26322.8	24244.3	32150.1	32439	33166.5	31328.6	30427.9	31393.1	28372.4	31408.4	30800.4
M189T34_2	189.124	34.176								6461.29	4840.57	2521.31	2702.47	3156.09	1617.12	7859.29	2693.56	7607.81	5861.49	13214.7	5218.33	2427.03	17874.6	19266.4	18011.5	17878.8
M821T485_1	820.865	484.981								10609.5	14052.4	6375.76	15717.9	10082.9	9837.76	12420.4	9838.96	11768.1	9931.8	11396.8	11664.8	3352.21	12324.1	10592.8	12313	12307.3
M845T39_2	844.519	38.6125								7075.05	9732.44	11144.8	12028.2	10832.3	45609.2	7900.64	8616.54	11207.5	22655.2	6258.69	8985.47	8534.52	8720.69	8134.56	8719.94	8686.09
M990T387_1	989.525	387.481								22666.1	21956.5	10399.6	19919	14862.3	11166.9	12939.7	10458.9	33427.1	16531.1	19771.4	24188.8	1307.31	15829.8	15870.4	15828.8	16529.6
M426T150	426.355	150.02								16219.4	56609.8	13157.9	81196.3	40577.1	81794.8	61960.3	11972.4	48521.5	25860.4	39209.4	54736.3	8234.58	51187.3	53328.3	55029.7	55930.7
M715T347_2	715.033	346.663								378.867	552.62	228.601	343.514	286.995	373.772	594.214	300.98	314.64	553.244	285.24	9773.19	338.586	3845.56	888.931	648.74	1086.85
M718T33	718.433	32.7555								6706.4	270.728	1910.64	1948.57	1867.15	9423.05	15711.7	15290.7	16022.7	6890.96	11250.3	4150.79	4436.31	10382.1	11651.3	11325.4	11654.3
M1062T189	1061.65	189.266								10991.6	16043.2	9872.04	12348.3	14514.3	12564	15759.8	9799.72	11999.9	9924.19	29421.1	15060.7	17805.8	12838.4	12887.7	13118.8	14627.7
M1057T190_2	1056.72	190.483								9130.47	9772.99	9931.89	6679.12	7252.73	7568.71	7990.7	10931.9	8453.72	8674.45	8287.03	12695.9	8910.42	8554.57	7172.1	8293.34	8035.15
M756T343	755.953	343.343								58397.7	62382.1	100213	64928	108262	110095	106921	102736	65263.5	100624	111114	102814	101590	69976.5	83942.5	69879.8	69657.1
M795T145	794.563	145.181								27693	24954.1	24408.5	28775.5	24754	26371.4	23420.1	11067	26416.9	26205.2	12173.9	21849.5	19217.7	22546.4	23588	17356.8	21202.9
M337T438	337.047	437.897								41847.8	31974.8	36027.2	92422.5	35893.1	29786	28791.2	29251.1	30001.3	33955.2	26136.7	34239.5	35596.3	30057.8	29959.5	3156.16	30309.8
M383T28	383.364	27.543								4479.07	20340.1	7069.53	13679.5	15458.4	11704.8	5213.26	5248.35	5984.85	10621.8	7584.62	7529.81	7929.86	12051.7	10953.3	13059.8	10663.4
M291T309	290.882	308.961								87001.5	83327.2	73505	59959.9	73320.1	69740.6	86303.2	65357.7	71275.1	89608.4	82137.8	90716.7	77958.8	85574.2	87897.2	86402.4	89409.6
M578T33_1	577.515	32.7605								24439.2	23319.8	11904.6	17073.9	15833.3	7496.69	20938.2	15561	14197.2	12234	25144	19193.3	24113.7	22062	20563.8	20162.4	20172.7
M762T43	761.696	42.851								12108.1	18184.3	5707.22	8703.82	14772.5	8945.68	6706.18	11444.6	18844.1	4618.5	5879.28	4790.76	5044.97	11998.8	12352.5	12304.7	9335.19
M797T342_1	796.954	342.157								103836	80344.9	102923	61437.5	99280.2	68653.9	102469	98079.7	88338.7	100511	63450.4	91019.5	94207.5	85607.2	80895.1	85507.8	80820.1
M633T347_2	633.032	346.588								27297.7	1309.49	15333.1	79136.9	1448.62	973.795	39972.3	650.977	56072.6	53855.9	996.713	1243.42	8299.93	39208.2	39220.4	1740.36	39284.8
M746T40	745.552	40.478								29038.3	5413.13	25983.3	30506.4	29149.1	38027.9	23762.5	25332.2	23898.1	8546.14	59187.9	30447.3	33207.9	23745.1	24564.3	23788.4	25424.2
M628T34_2	628.454	34.086								2829.97	2028.76	4141.26	4920.57	7683.4	3380.5	2643.51	710.143	3751.19	740.087	2226.81	5964.04	2577.37	4026.81	3636.87	4729.85	4738.13
M628T35_2	628.495	34.805								2086.45	4412.48	4305.71	5969.84	4326	3952.78	8672.15	4877.28	6696.36	3756.72	5052.04	6972.79	2929.52	3839.87	7593.67	7562.41	7597.31
M337T35	337.327	35.441								35431	35254.5	5087.32	28940.5	2322.93	8731.57	6462.03	10797	6578.28	24835.2	16874.9	8262.26	8093.5	11587.6	10471.7	11650.4	11315.7
M642T32_1	641.511	31.766								13215.1	12985.9	9449.21	20101.9	10875.4	19208.8	20047	7474.79	14047.1	13855.7	17795.6	20041.8	16659.2	13788.8	13486.5	13760.6	14374.5
M267T242	267.057	242.066								47775.1	52123.4	41211.1	42978.7	36141.7	44357.3	63192.6	33896.5	39268.8	42881.7	44846.1	41453.2	42106.2	47996.6	47956.4	47291.9	45407.9
M992T448_1	991.618	447.762								11166.6	10074.9	10594.2	9533.23	10424.4	8514.14	10851.3	10954.8	8371.17	9564.52	10468.4	12066.5	10186.4	11843.2	10302.2	11433.3	11175.2
M584T200	584.331	199.694								10166.6	15727.4	7714.59	7199.73	6289.89	11144.5	3632.56	4986.83	18894.8	8038.19	10493.2	8498.69	7671.2	15126.1	15275.1	15125.5	15834.4
M513T32	513.394	31.965								12723.6	9464.08	8592.18	9608.22	7521.88	8966.82	7850.75	8508.19	11087.3	7470.02	10682.1	12927.4	8475.69	11391.4	9786.61	11126	10742.2
M512T33	512.25	33.349								4213.8	2903.38	1792.49	2143.89	2416.64	11528.8	12566.9	11035	9830.81	12124.2	7302.11	2755.66	2207.94	7036.44	7538.33	7207.18	7310.62
M549T189	549.37	189.266								19705.5	26518.2	23027.9	24288.6	26288.6	37078.7	31208.3	28905.6	27665.4	25197.1	25421.3	28976.3	18359	27352.9	27146.5	27805	27799.4
M71T288	71.0596	287.622								139641	96780.1	162598	145123	164543	192151	100673	76834.5	167840	81088.3	153160	104768	91494	107842	131945	101219	99489.3
M362T48	362.267	48.4455								14516.5	12127.5	15781.9	14007	16745.2	860.947	15681.9	17125	10971.6	3972.99	11360.3	11443.3	12554.7	12311	12304.8	11921.6	11935.5
M719T148	718.57	147.604								44806.4	36418	46770.5	40529.6	43726.2	45536.3	41566.7	33648.2	36209.2	29518.7	43956.5	41209.6	37040.4	40286.4	42058.6	41977	38304.3
M500T199	500.273	199.031								27936.2	35096.7	21893.5	26585.7	25422.7	25336.8	36965.8	18895.5	18700.1	28747.6	31736.5	33625.2	23750.8	29165.8	29166.9	30044.3	29247.5
M765T58	764.519	58.186								48583.6	40594.8	36130.2	42140.4	22802.1	376342	45738.6	26839.5	48070.7	77570.4	57464	34549.6	52195.6	46108.8	46020.1	54490.1	48136.5
M671T34_2	671.285	34.0985								3294.9	1978.97	6187.91	561.115	5214.76	6371.96	3141.17	6907.19	4575.57	5338.22	3872.67	3745.43	2206.3	3462.53	4588.92	4334.9	4522.33
M836T157	835.658	157.475								109974	108650	72727.2	117468	108959	83454.9	71337.1	59530.6	113714	137976	63433.8	77886.5	67183.6	100513	105863	106161	80792.7
M613T27	613.494	26.932								18252.5	16982.3	24596.5	22476.9	12737.2	15097.9	16626.3	22592.5	32930.3	14082.1	27279.1	19280.1	20425.4	16789.5	16843.2	16414.8	16720.9
M792T145	791.622	144.575								48615	40897.3	45434.1	42339	51880.6	38865.4	47677.4	54298	48130.8	53312	35016.4	41756.2	59407.8	42315.5	44114.1	40213.3	40155.4
M324T19	324.076	19.386								74991.9	106693	74558.6	56881.7	55540.6	98037.1	52345.7	98501.1	123039	90998.3	117373	68013.2	46886.3	115550	115541	109337	115538
M804T39_2	804.015	38.625								12856.1	11558.7	15298	12787.3	17800.2	28767.6	17054.6	10552.3	14577.1	17139.4	13913.3	15262.4	9780.66	13793.6	14653.6	9078.97	14684.6
M848T38	847.635	37.96								5980.14	6045.28	8657.78	7667.18	8665.63	6974.64	5896.62	6159.2	4407.76	6834.67	3657.57	5726.34	7198.81	6687.81	6100.06	6546.57	6683.61
M520T221	520.335	220.814								3920.17	3893.06	3344.68	21173.6	3556.9	21031.6	4200.56	19126	30933.9	4127.36	2440.8	4299.44	3399.74	15335.1	11801.6	15475	10487.1
M1019T341	1019	341.415								49677.2	66377.4	50626.4	73187.1	52727.4	74352.9	72408.8	44811	67751.7	44785.9	64007.5	60190.5	41261.7	62935.5	62934.5	63673.2	63049.9
M1056T190	1055.71	190.474								17066.2	13957.1	13335.2	15423.3	10776.1	12262.9	13955.7	17508.6	14604.7	20476.8	14981.4	18362.2	16886.5	16119.4	15437.2	16180.4	15725.9
M555T190	555.349	189.875								18376.8	19566.6	16163.7	19423.3	17511.8	19329.8	22991.5	22388.2	17855.8	27232.9	16630.4	26719.7	22046.6	20034.6	21027.2	20074.5	22228.5
M585T68	585.266	67.553								35680.3	17637.3	40277.6	28800.6	21748.9	14146.8	28876.1	20958.3	22556.2	6900.46	14629.3	18515.8	7431.92	44133.6	45372.8	42415.2	43173.6
M203T291	203.051	290.875								44545.3	53939.4	40321.3	50523.8	54002.5	61993.4	39298.8	43813.8	71886.3	37734.5	45828.1	32198.3	44444.3	50365.8	39778.6	39863.7	39908.5
M462T57	462.264	57.0865								23015.7	15812.7	39468.3	17300.8	18654.4	5093.39	19161.5	19850	20890.4	15562.8	16137.7	16475.4	24587.1	14127.7	14132.5	14363.1	16946.9
M317T352	316.919	351.635								105836	114238	157494	108955	115649	167623	162280	166141	109767	172354	170355	114743	112819	149563	149486	143276	143364
M845T140_1	844.521	140.305								28347.2	29656.9	41022.1	34269.1	34138.9	39035.1	28635.6	29809.2	32341.6	29532	27777.1	30902.8	28251.1	33044.6	34142.8	33060.8	39323.8
M578T186	578.414	185.597								19373.8	24365.8	24261.5	21460.6	21902.8	24208.3	25842.2	23739.4	28940.8	15453.5	19651	16576.1	18749	24739	24089.8	23777.5	23775.3
M743T148	742.532	148.213								27711.5	20431.4	16732.4	44810.5	10941	20605	33852.7	13727.5	19405.3	17235.9	43647.4	30597.8	37422	19107.2	19065.5	16181.5	18497.2
M990T387_2	990.027	387.412								26652.4	22330.4	10590.5	16178.7	14995.7	10040	14361.4	10201.3	36858	16538.3	18883.3	25394.2	1648.49	16760.7	16764.5	16770.8	17454.1
M614T329	614.342	328.964								4077.1	5554.58	5620.97	2513.89	1494.22	1822.4	3491.2	2668.26	3006.88	7343.73	6149.31	4175.72	1932.89	4228.18	4227.94	4228.25	4362.59
M438T306	438.03	306.016								56103.4	58318.5	60349.3	61134.1	57400.7	63857.7	57556.2	49766.5	66673.6	60462.8	57247.5	58341.3	61049.3	61323.5	60462	61372.5	61372.1
M438T303	437.949	303.007								40681.8	805.365	1290.99	38990.3	1103.44	43765.3	2184.07	61351.9	46335.1	73832.8	733.318	655.607	3887.56	31313.7	31400.3	5212.04	4176.01
M529T32_1	529.388	32.057								4427.04	8439.9	8688	4740.95	3650.61	2820.59	8993.62	3350.33	4253.34	3678.31	4443.21	4108.02	9974.98	4774.44	4761.17	4684.83	6131.49
M608T488_1	607.608	488.199								13592.2	12479	9017.43	13796.4	9441.01	10110	13860	15160.1	16387.2	12294	14969.8	12745.1	7752.87	13896	14335.5	15453.4	15427.4
M756T176	755.6	176.323								27452.9	32257.5	23679.7	23005	22977.8	38860.4	24173.1	22846.3	26432.1	36148.8	30543	23778.1	26398	28794.4	30157.7	27773.2	29177.5
M655T32_2	655.327	32.353								11956.4	16888.6	7842.51	5481.24	9551	8230.98	14797.3	13889.1	10275.4	7436.56	15857.9	12811.8	5108.31	9806.17	13003.9	12988.9	12994.9
M800T199	799.664	199.031								42615.3	14170.9	48700.1	32477.8	40626.9	30444.3	46060	42974.1	55360.5	45789.6	35207.9	45274.3	12499.1	46816.7	46912.8	47106.5	38178
M652T194	651.53	194.148								9109.45	12338.6	17169.1	10508	12485.1	17229	11691.6	10774.1	16718.9	9824.96	14289.6	9977.11	18131.9	17449.6	16805.1	17459.2	16387.9
M169T379	169.057	378.522								160501	156383	130002	124579	162469	144194	94442.3	125613	132307	120972	148588	99845	76809.7	111740	138308	138235	138122
M86T258	86.07	258.296								37071.1	914.674	1465.57	400.666	1076.62	45251.7	2041.64	39512.5	1079.23	1692.81	57745.1	1487.09	957.353	1092.57	881.335	1162.77	1158.33
M776T33	776.436	33.479								11081.9	9697.02	11262.7	11271.4	17423.6	5718.46	6588.27	6907.27	7991.28	5570.87	7541.2	8663.57	11566.2	5375.47	5708.73	5113.98	5522.35
M744T341_4	744.474	341.467								55860.1	69485.4	61776.8	74669.5	64191.8	74324.1	69162.9	58808.3	73195.6	62608.6	66749.2	64911.5	59735.4	67075.5	68579.7	69696.3	68106
M575T34_2	575.252	33.5015								9064.76	6534.49	9653.49	10454	9707.5	6856.51	7734.18	9442.82	9393.05	6075.65	8905.61	13175	10684	9952.91	9976.97	11710.3	10383.9
M414T198	414.318	197.795								23914.7	21274.6	7146.48	14674.4	18661.3	14157.9	28939.6	14314.9	13239.8	18369.6	11507.4	17215.9	18044	16967	16761.1	16505.4	16188.4
M793T148	792.621	147.919								5191.59	9117.85	16933.4	9794.06	12543.5	16765.3	6827.89	6890.65	11594.6	10223.4	4349.29	10932.2	13864.4	8646.28	8174.84	9928.25	8170.34
M903T195_2	902.571	195.287								13513	12564.8	10863.4	11596.8	9917.33	11065.5	12521.4	4912.31	15743	8309.09	17640	9563.23	11807	13718.4	13702.1	12330.2	13731.3
M1060T341	1060	341.488								43005.6	58305.2	44547.5	64587.7	48490.7	60083.7	60504.4	37610.7	61431.3	44009.3	55175.8	54096.5	35572.8	53719.2	53720.8	53757.9	55267.3
M797T347_2	797.037	346.737								235.081	11412.3	8891.09	326.653	197.873	717.206	6652.71	10464.2	419.503	348.975	394.493	241.781	246.255	1078.65	880.77	3545.7	1171.25
M324T5	324.075	4.945								73653.4	39819.2	71973.7	79813.8	71511.5	53225.4	61532.1	69259.8	15677.2	69101.3	69033.2	16776.8	62134.6	69441	69455.7	64506	68506.2
M863T38	862.626	37.988								5352.51	10598.9	10931.5	8715.72	8259.32	10996.9	7330.93	9309.92	7428.07	8076.03	4406.42	6746.62	7295.23	9856.32	9522.94	10084.4	10080.8
M996T32	995.782	31.612								17181.6	8820.02	28721.3	4162.28	17432.1	4806.9	10137	16783.5	6291.58	6584.11	3895.62	2656.01	12901.2	5293.42	5530.35	5812.91	5281.83
M516T202	516.297	202.342								10411.1	36913.3	23304.6	12350.1	28059.5	25285.1	15196.7	16346.7	5855.4	17397.4	10488.9	16984.8	30607.6	12081.8	12218.4	12285.6	12242.6
M775T137	774.538	136.635								61228.4	33605.6	52987.2	37312	44332.9	30300	36614.3	50181.4	50302.4	20638.3	40530.5	36564.1	35318	39896	41028.8	41004.8	35076
M764T88	763.593	87.579								74736.4	52194.1	103844	75231.4	55160.5	62387.4	90426.8	69563.6	149282	47646.1	85277.8	46942.5	83179	78082.5	79299.4	74025.7	79254.8
M484T197_2	484.327	197.115								12492.2	13433.7	14590.2	8041.76	11729.1	10614.7	11829.3	10869.4	11919.9	11027.1	17127.5	13592.4	13065.7	13905.5	14158	12534.7	14162.7
M855T341_4	855.498	341.42								45174.4	61253.2	44042.5	65658.4	51833.8	62641.2	62374.5	44422.4	60353.5	42678.6	57251.5	55849.1	40103.8	53666.9	56456.1	56718.5	55327.2
M154T349	154.057	348.568								55841.7	39740.4	38491.9	43614.3	29531.8	34610.2	39008.7	48172.1	37014.8	29812.4	37656.5	37494.1	38916.1	40057.9	39205.8	40113.9	36920.9
M870T32_2	869.736	32.257								29339.7	7874.58	15812.9	7595.31	10142.2	7233.95	11389.3	18846	2846.12	7110.77	12052	4550.36	38971.2	3680.6	3569.62	3610.65	3677.29
M145T333	144.926	332.648								27081.6	26387	24947.5	23480.9	23372.6	28556.2	27438.3	22977.3	27850.4	28154.2	28671.6	29364.3	26967	27676.2	28261.6	28084.7	28403
M130T123	130.064	122.788								95849.3	219296	101667	246573	156194	95749.3	235169	188891	235359	55224.4	232927	244892	167668	173044	114342	173149	172807
M757T86	756.549	86.492								53824	45566.8	26033.9	33396.5	32684.2	75505.5	43618.1	27109.5	32503.1	47779.5	72563.1	56761.3	78633.1	45333.2	47460.7	47452	43426.3
M741T145	740.519	145.165								60301.4	38181.7	35334	31027.3	22404.3	42373.1	38971.9	29825.1	70939.2	38441.3	74154.5	36986.2	51693.4	34708.2	34746	34408.4	33990.6
M623T32	623.499	32.167								25100.6	19796.3	21858.1	21174.6	18068.8	15088	24293.7	15748.5	18664.7	10545.1	22517.5	17853.7	20970	17826.8	16870.3	16781.3	16780.6
M941T31	940.733	31.425								22833.1	10290.9	18549.2	11153.6	10617	12118.5	14014	14984.5	5824.49	13009.7	10677.4	7865.24	18107.2	8254.16	7858.64	7461.41	7671.65
M299T388	299.044	387.803								9193.18	922.227	974.691	43401.3	1668.48	2200.46	1726.51	854.048	4067.58	987.333	1128.58	1177.85	477.922	1262.27	1301.58	1404.49	1255.32
M167T305_1	166.949	304.786								53138.3	66034.4	65211.6	67540.7	51457.1	80761.3	61997.5	54049.3	86093.9	44478.7	63150.2	58123.3	44817.2	69127	67903	68853	69131.7
M199T35	199.095	34.87								8980.21	5522.32	6421.74	5605.5	6665.21	1769.25	12492.1	11120.7	10207.7	8115.48	8100.52	6169.34	7002.85	6310.51	6501.81	6307.32	6616.79
M298T348	298.023	348.332								39284	49510.7	29600.7	37913	44847.8	52697.2	41018.3	48142.8	63204.3	38470.9	67921	31313.5	31813.1	57729.9	58518	57756.7	62454.6
M773T341_2	773.495	341.495								52436.7	70312.3	55262.2	74707.8	61857.4	74077	73227.3	50345.7	66954	54135.1	63954.8	64289.1	50302.8	65116	67648.8	70095.7	66867.4
M522T199	522.254	199.06								2500.9	2304.18	2122.26	2192.56	3046.96	3016.82	2808.07	2412.34	2062.59	3325.85	3294.16	4075.75	3691.23	2536.35	2709.75	2764.02	2761.89
M757T116	756.548	115.844								69392.9	61236.7	52734.8	89090.1	80242.5	100168	43322.4	31274.9	53303.1	66420	98026.2	27019.3	80634.7	34811	34897.3	57895.2	34542.8
M1082T189	1081.71	189.268								9636.76	10151.7	9558.24	8570.29	9606.88	8472.62	9076.98	10764.6	13975.5	10066.9	8430.55	10938.5	6939.83	10253.6	9835.72	9717.75	9718.83
M685T32_2	685.431	31.6885								16365.3	6080.46	8670.61	9579.46	12448	12598.2	6340.82	8381.52	7041	15527.5	7461.61	9224.01	9752.83	11704.6	12300.5	12659	12658.6
M151T332	151.143	331.533								4102.85	2754.13	8594.61	1001.36	9623.62	9540.71	10086.5	6601.47	5450.58	25026.7	7136.99	5050.45	15358.3	7937.05	9099.07	9324.03	9740.27
M615T32	615.494	31.76								12115.6	14172.7	8876.93	10827.4	8632.9	10473.6	13753.2	7565.49	10241.7	10196.5	17024.5	13751.3	12487.3	10582.5	10863.2	11505.5	10247.4
M524T197	524.271	197.068								10576.7	9731.92	10963.3	8072.52	17748.4	15919.5	17464.8	8181.07	8087.85	12417.1	9835.54	11143	13833.1	11796.1	12238.4	13255.6	11871.8
M185T35_2	185.153	34.704								2031.83	2558.56	9148.8	4742.03	2890.82	1671.49	3248.25	2722.47	2397.57	2138.59	2209.98	3467.29	4507.29	1475.26	1794.4	1703.29	1789.47
M466T187	466.327	186.836								5572.36	10286.6	5533.91	11191.5	9044.56	9131.73	7184.39	7496.16	8712.48	7396.09	11704.3	10655.6	5653.51	10503.3	11032.4	9770.59	7914.32
M497T347	496.955	346.664								83740.4	133008	78690.9	52442.2	81150.5	87281.1	87462.3	125538	86465.7	83782.8	140507	78108.8	121851	88976.3	111772	89159.6	89417.5
M731T41	730.534	41.063								35546.1	36497.2	23098.2	29576.3	38821.6	29227.4	44836.6	27911.8	27555	31434.3	38323	49004.6	37983.9	37945.4	38582.9	37948.6	41241
M704T33_1	703.553	33.475								2691.2	12242.6	2922.64	4681.31	4176.7	2589.94	3042.5	3963.84	7128.72	2925.08	6291.3	4523.58	4259.44	6490.06	5216.21	6492.67	6482.13
M265T35_1	265.105	34.707								31811.6	18163.4	11660.2	20718.9	14816.6	7353.31	11693.4	17050.2	15369.9	18510.5	17710.8	13062.3	17988.1	16978	17053.5	18123.5	17756.6
M326T33	326.34	32.884								2538.5	2660.55	5224.56	2441.58	3926.98	1576.73	2424.95	8146.78	9979.18	1587.02	3550.89	3285.15	3378.11	3688.14	3667.95	4956.68	4018.97
M333T350	332.95	349.642								97351.4	163712	154186	104833	165678	169301	172629	164426	166064	106838	160862	165722	162031	106403	111662	107473	108764
M823T154	822.592	153.649								17883.7	12373	24886.4	18303.1	27322.4	14561.2	8724.29	20134.4	16106	14023.8	18688.2	22157.3	19283.1	18260.4	15408.1	17861.6	18250.5
M471T34_1	471.159	34.244								3149.7	2202.39	2357.76	1609.11	4145.86	11646.4	10073.6	11172.7	9045.61	13514.8	6704.46	2525	4155.79	7510.48	7558.39	7914	8284.21
M1029T448	1029.06	448.09								18922.1	18062	18954.2	22266.8	17824.5	22208.9	15766.1	19427.9	20252.2	13827.8	19903.9	17800.6	18263.7	19399	19744.9	20327.1	19397.1
M331T398	331.109	397.874								14284.2	17789.8	23301.3	20924.7	19539.1	21446.8	14797.3	14437.9	20574	9303.92	14834.1	13668.9	13596.3	18595.9	18273	18475.3	18595.5
M591T32_2	591.485	32.2								3715.49	8193.52	9995.68	6506.58	10604.8	8180.38	7906.39	6963.7	11535.2	4640.05	7566.73	7371.42	7092.26	9987.99	7803.09	8327.99	7954.27
M487T32_2	487.38	31.76								12636.9	11757.5	13439.2	10384.3	9809.53	7718.03	10976.6	9084.6	13009.1	10271.3	8559.96	16500.1	13481.7	17606.2	18295.9	18325.7	15859.4
M997T32	996.793	31.6645								14827.3	5663.96	31425.9	5526.13	14258.8	6514.3	8766.34	14964.1	2818.82	3496.31	2857.51	2658.91	11099.2	2826.32	2170.14	1898.33	1874.4
M801T59	800.611	58.948								65552.5	72368.3	57941.2	106385	72168.4	37803.2	97879	90229.9	97101.2	68510	94222.5	93473.4	55970.9	87167.3	90762.4	87382.5	105139
M1017T31	1016.76	30.911								19471.2	12966.6	22034.9	13750.8	14044.1	5520	9460.76	20306.9	4731.91	5260.91	14129.4	9062.76	11539.9	7900.18	9364.84	8714.58	7813.63
M1072T341_1	1071.98	341.415								45637	56190.9	47774.2	61205.3	53488.3	62099	64942.5	44735.8	55786.7	47461.8	56290.3	54887	40395.7	57058.7	55992.6	58180.2	56389.1
M802T32	801.55	32.171								5407.11	7716.16	7703.11	6461.3	8548.4	11135.9	5404.35	5462.73	7536.89	10190.5	6935.11	8722.5	7509.74	10193.5	9901.65	12943.9	9903.77
M779T145	778.533	145.181								28333	28384.1	20054.1	23044.3	23025.8	24847.2	27803.5	17140.9	14096.5	21422.5	19347.6	29913	39626.9	26252	26635	27047.3	27062.9
M643T248	643.282	248.452								10123	17380.3	12403.1	11727.6	18636.1	16048.4	17429.7	12835	12471.3	12555.1	14808.4	13284.2	10952.3	15769	15535.3	15969.2	15966.7
M235T357	234.916	357.022								138289	143399	137780	123214	146445	143801	148071	143891	141281	148494	142755	150738	147794	141538	142143	141239	141241
M210T159	210.132	158.868								15642.7	3861.78	14261.8	16998.4	16283.4	10066.4	1770.2	11727.4	2977.59	6303.13	6316.77	18962.8	5630.67	24825.6	20375	23148.4	23802
M1000T194	999.652	194.135								10694.7	15031.6	18181.1	14861.6	15370	18716.6	4464.52	9803.47	19030.5	15485.3	18851.4	14404.8	9473.63	15257.6	16834.7	14316	14792.3
M309T398	309.127	397.846								14660	17753.9	23787.7	23067.2	22850.9	22925.9	16488.1	15214.3	21316.9	10093.1	16621.9	14343.6	14689.8	20388.3	20166.4	20095.7	20718.7
M574T194	574.313	194.153								20136.1	30060.4	25871	33390.9	27791.1	20673.4	25448.4	25783.1	24487	27126.9	19001.2	26271.5	18597	23708.4	26098.3	20867.3	26016.2
M1002T342	1001.96	341.516								53963	62246.1	56431.6	68487.4	58858	68401.2	35309.6	56030.1	68665.3	62011.4	66025.5	62169.5	55829.1	63776.1	66180.6	64240.6	63778.3
M722T188	721.579	188.048								21262	22944.1	27335	16280.5	22945.3	13335.4	19182.8	26532.6	20584.2	18131.1	19582	18954.2	24763.9	22395.1	23161.1	21182.1	21047.9
M764T118	763.594	117.91								95898.1	64256.8	93911.3	102906	168196	195983	135349	59864.7	220769	66857.9	237509	10908.6	200864	163487	163409	164032	65898.3
M879T347_2	879.041	346.658								1024.9	2450.74	1220.59	1823.99	2169.22	2662.55	51632.7	36544.1	2279.14	2390.92	2618.14	2461.06	2039.75	2117.77	1998.46	2098.9	2085.86
M258T348	258.042	348.332								42998.2	34850.9	28775.8	38446	27960.6	31934.5	33630.3	35811	31556.7	24931	34990.8	30830.6	32034.8	33613	33349.1	33971.1	33466.1
M817T40	816.636	40.4775								16656.3	15969.8	18919.3	16424.7	22655.5	19233	19266.7	24905.3	16135.3	19170.6	13810.6	13242.3	17868.3	20049	20855.7	20865.9	18178.6
M431T33_1	431.224	33.374								8073.37	1918.3	3658.67	2380.77	3234.23	10193.7	10514.5	17253.7	11422.5	9150.83	10172.6	6174.72	5936.04	7456.58	9305.83	8881.27	9298.46
M876T34	875.783	33.548								15414.1	3269.69	28636.9	4290.01	13895.3	2803.01	5082.99	24523.3	377.009	1989.93	3077.86	569.655	31106.3	476.045	298.892	524.847	417.302
M863T307_1	862.71	306.901								37070.4	32166.1	26796.8	21431.3	19621.4	21815.2	30949.4	20066.1	26031	25449	27835.5	40682	22882.4	34624.9	34627.7	34945.9	35065
M1101T341_1	1101	340.885								35006.1	55228.1	35849.7	54845.6	43597	53061.9	52741.3	31630.1	55503.5	40367.9	49626.9	48729	31130.2	44245.7	47495.1	46952.6	47495.1
M824T39_4	823.632	38.6105								12440.5	18047.3	15150.9	11092	17850.1	24553.7	19789	14871.9	12768	5066.19	18564.5	10969.5	15069.8	14125.4	8682.74	16877.4	14366.2
M650T387	650.128	387.036								24072.1	20274.2	25125.6	14901.3	13059.8	16687.3	17438.1	16314.3	21703.6	15877	18949.1	22355.6	16354.5	21315.3	20782	20780.5	20976.2
M204T412	204.096	411.707								21098.2	36973.9	21310	14992	37433.9	39664.2	40438.6	30095.9	28932.6	40415.2	35073.7	38904.4	37559.3	39297.1	37126.1	38487.4	39592.3
M342T184	342.262	184.322								16509.3	11435	6430.81	18818.3	17854.3	25726.7	22456.6	15467.6	11982.2	14252.1	8798.78	8898.29	23456.9	16641.8	16357.6	15521.8	16641.2
M681T347	680.952	347.341								205.135	357.304	169.276	9683.2	8104.67	410.851	305.575	308.433	406.789	12946.5	397.624	278.807	7208	630.372	2944.25	417.457	757.612
M703T342_2	703.472	341.505								58904.7	65161.1	59136.7	71668	63576.6	73953.4	72945.3	58919.4	72461.1	60937.3	67748.6	65321.9	56995.3	66178.4	65847	66622.9	65848.8
M586T348_1	586.052	347.692								37759.6	35695.2	29571.6	36321.9	33592.5	36305.2	37865.4	32193	36998.6	34125.5	41590	34898.3	30559.4	36433.6	36714.1	36456.6	37746
M747T34	746.509	34.1085								9619.79	7342.49	10993.6	10018.1	10396.1	4854.52	10432.4	7955.07	11176.2	1564.71	10479.6	8766.57	10236.9	8910.61	8579.62	8292.47	8273.49
M706T189	705.551	189.214								24980.7	13651.3	18414.2	16887.8	20571.2	14691.2	18710.9	30322	17632.7	16563.9	17598	15914.7	18162.8	19529.8	20391.5	20417.9	17238.1
M469T347_1	468.944	346.543								83397.6	61518.8	79872.6	55998.5	91482.3	52960.2	54124.3	52359.2	55314	89039.3	54173.4	56633.5	49010.4	66072.4	75103	66048.6	70209.3
M963T34	962.752	34.086								6894.15	7532.33	9561.27	6782.41	9613.31	1253.87	7475.93	8078.02	8622.47	1076.13	7476.98	7209.54	7764.14	8330.32	6218.35	6738.52	6208.63
M236T462	236.094	462.075								61047.7	105049	114581	70326.9	61286.1	120256	109674	94457.7	110538	36831.6	119881	100881	114911	132684	128101	111567	133535
M645T32_2	645.487	32.1135								2291.39	3876.43	3537.39	2123.85	2603.89	1762.97	3873.5	2517.26	3691.23	2800.13	3849.54	1286.88	4520.86	2951.9	2260.24	2533.55	3127.53
M780T138	779.572	137.85								50010	55523.4	71614.8	58821	65756.7	38690.8	49219.5	66698.9	69242	37791.2	54328.8	54649.2	68470.4	59167.9	59056.7	67241	59155.9
M780T39	780.091	38.635								11769.5	20206.7	22164.3	22057.6	22928.4	32534.9	25721	19743.2	23635.5	27444.3	18503	16757.6	23038.1	20321.3	20321.4	20760.6	20391.5
M756T347_2	756.036	346.759								1370.79	3412.11	896.428	1730.15	1886.12	2425.58	2120.02	1458.15	2138.89	2796.05	1022.06	43548.6	37737.2	1762.91	1767.84	1894.3	2142.94
M130T153	130.063	153.072								37774.1	41489.9	32612.8	56200.6	31928.8	16140.6	43297.4	41180.2	43192.2	24599.4	41571.6	47065.4	40036.5	35412.6	33901.9	33908.7	34360.8
M774T171	773.555	171.245								1856.09	3695.3	2387.39	7576.52	1842.82	11181.7	2703.25	13327.6	2170.54	19365.5	2562.83	2465.39	2174.95	3269.07	3347.96	4898.2	3382.38
M368T27	368.338	27.3345								7975.85	8629.18	7253.12	8315.02	8807	7235.86	6770.77	6772.86	7478.19	6423.14	7301.75	5436.52	6977.19	10695.1	10967.9	9678.51	9933.06
M833T86	832.579	86.002								61009.1	64379.7	61733.6	62421.8	77164.6	217192	74680.2	57277.6	53583.6	80850.9	68450.9	72533.3	75795.7	72984.6	85166.3	68548.8	75213.6
M282T84	282.277	83.502								72838.6	51858.9	32182.4	44621	35959.4	17711.7	39651.6	58824.1	63316.8	20691	55238	37857.1	47782.5	55604.8	52056.3	52929.6	53651.2
M527T33_2	527.202	33.3665								9028.84	5521.1	7925.6	8454.67	6672.53	7410.07	6326.91	7169.55	1251.53	10845.3	7910.08	8892.39	11661	6076.89	6339.66	7774.63	5844.83
M1010T448	1010.09	447.739								10925.1	10425.6	9751.27	9588.68	9431.66	8867.14	11483.1	11436.2	8408.91	10512.7	10152.8	11289	11741.3	10136.8	10148.5	11908.7	10073.2
M744T177	743.601	177.107								21936.3	23312.1	17796.3	25643.8	18484.7	31301.2	22822.1	21878.1	23781.8	28747.3	25813.7	20027.3	19678.6	24957.1	23367.4	24513	23353.9
M173T239	173.07	238.944								11338.7	20038.7	16215.4	28666.6	14197.9	5154.32	23248.3	20541.2	28073.6	35721	18164.7	16742.1	4020.84	20124.9	20677.8	20422.2	20723
M721T341_1	720.512	341.453								25512.5	33784	24626	35871.4	29109.3	36314	34677	23087.9	32496.4	21974.8	31730.1	27345.3	20082.2	30218.5	30437	30438.5	30395.9
M814T341_2	814.496	341.453								49083.3	67526.9	49077	67604.9	55007.4	70272.5	66408.6	43877.3	65499	50642.2	59101.6	54158.2	38626.8	58120.8	59619.9	61004.3	59051.7
M910T488_1	909.906	488.199								8914.85	10169	5754.99	9410.99	8003.28	7744.97	10699.8	10366.1	10551.5	10752.9	10321.4	11038.7	6481.92	10309.9	10751.9	10696.4	10973.7
M390T304	389.949	303.856								39909.9	55330.6	42071.8	42163.6	48778.9	32776.9	48269.2	40432	40983.2	29431.2	48512.7	47747.7	35054.9	48360.8	47937.9	48362.7	47935.9
M175T34_1	175.11	34.0225								14689.9	17100	10453.4	11286.5	10874.5	8637.62	13898	14544.5	16863.1	10325.4	13222.2	12741.8	15585.5	14094.2	7739.66	13888.5	14051.2
M584T34_1	583.504	34.084								11679.1	12912.2	11739.4	13470.3	13677.7	1025.82	12481.3	16688	13626.4	1146.06	15497.4	11983.3	16470	13092.5	13111.9	13087.6	10356.1
M536T306	536.007	306.035								48603.8	50666.9	52997.6	51295.3	48545.9	54388.1	48548.5	42990.9	59748.7	50856.2	48244.5	50902.7	49294.2	53889.6	52799.8	53491.2	54080.7
M804T140_1	804.016	140.306								28293.8	26352.5	34696.7	26123.4	25551.2	26365	23295.1	28030.1	24274.9	20031.6	32158.8	22791.5	22425.6	30076.2	31360.3	30074.3	30246.2
M391T35_2	391.339	34.748								1695.23	2861.4	1343.66	7008.33	1099.7	1539.54	6699.97	6097.62	4836.51	12994	1098.3	930.259	13102.6	2487.96	3423.88	4180.91	4136.91
M920T342_1	919.958	342.094								70285.9	79356.2	73237.3	82132.3	77013.4	42851.2	85746.5	71464.9	81636.4	72355.3	81879.1	77398.5	76374.3	78185.9	78220.4	82511.9	78619.1
M817T143	816.636	143.364								45632.1	41870.7	37126.6	40111.5	39294.2	38337	34720.2	38053.3	32029	43474.2	27025.6	23058.6	38429.4	33900.5	33893.9	40713.7	33774.7
M187T431	187.07	430.832								30906.5	30966.6	24881.4	10311	35745.2	35924.7	38491.8	42904.3	32553.7	40258.5	41399.5	51043.7	40040.2	34120.9	42652.1	40069.4	41409.8
M279T407	279.043	406.627								67311.6	47611.4	65399.8	19343.3	49194.1	53820.1	51240.4	40224.5	54990.7	48657.8	57386.9	58767	43805.5	53610.7	55057.6	53627.5	53634.3
M170T373	170.091	372.814								63163.6	118409	46162.8	41179.7	61071.4	93854.2	37161.6	21734.9	54153.8	69889.8	62431.8	5435.73	28241.1	100447	100489	100467	108392
M662T342_2	662.471	341.507								61287.1	73924.8	68582.5	74926.7	74025.1	77216.5	79372.2	64470.3	74447.4	73625.9	71154.9	73311.8	63892.4	69241.7	69245.1	69827.6	70535.5
M266T242	266.137	242.245								33.6506	63.4582	30.1732	43.2773	66.2052	29.7058	2622.4	2334.41	62.3535	59.2334	52.4185	2370.43	2044.18	232.853	156.219	1159.95	174.217
M606T198	605.542	198.424								19082.8	18272.7	14900.7	15471.1	15561.4	14666	15819	15914.5	18383.2	10999.2	13372.6	11386.2	15585	13465.6	12960	13926.4	12912.8
M193T309	192.905	309.178								64722.1	60251.5	56489.5	44852.3	54698.5	51603.6	64058.3	49514.2	52370.8	66502	61804.3	67924.6	58537.2	65383.8	65419.6	65824.5	66379.1
M1048T341	1048.02	340.899								39853.7	55115.6	38010.4	60614.7	42510.5	56216.7	55510.5	36450.2	49693.8	36837.9	50750.5	45552.9	32637.7	46731.2	47388.1	48896.1	46761.2
M622T34_3	622.369	34.1025								17045.6	5302.29	4854.63	4642.72	4224.94	3439.32	2425.36	3169.88	6057.45	6715.3	6412.45	8534.06	12265.5	11675.1	11779.3	11612.6	11916.7
M1001T387	1000.52	387.469								12144.5	11656.4	4217.09	12344.5	9657.88	7134.85	8927.03	5476	18092.3	10721.2	10109.9	14474.3	640.775	8200.56	8627.53	8847.27	8840.69
M720T147	719.572	147								11059.9	16493.1	19073.8	12049.4	15304.7	11050.1	14218.9	26362.1	19241.4	13284.2	14835.1	12370.3	16933.3	19198.1	18804.4	19204.6	18369.4
M1013T34	1012.77	34.034								10056.2	9662.46	9336.77	8575.12	10857.7	841.456	10471.4	8853.46	9674.58	487.337	9877.15	8587.81	10276.7	8309.98	7657.74	8061.66	7846.11
M132T419	132.064	419.146								26629.3	62941.2	26543.5	31606.3	22074.1	72605.5	30670.1	65118.5	28213.6	66969.7	68365.7	25972.2	22588.2	45629.4	52567.4	45137.6	52440.4
M961T342_2	960.96	341.507								62020.9	70637.2	61235.8	68966.4	67694.5	77377.2	73010.1	64118.3	77268.2	67395.7	70686.3	65957.4	66016.1	70182.1	70854.4	70694	70565.3
M276T432	276.117	432.027								48059.7	39248.9	43015.8	59245.4	49047.8	35792.5	35328.9	39342.4	37687.7	26492.8	38314.8	27280.5	24332.9	39409	36948.3	36949.8	36923.7
M391T448	391.064	448.096								22255.4	24047.4	23334.1	30549.1	23198.5	20964.5	21801.5	19504.3	23573.6	19212.6	21383.7	23249.8	17268	20385.6	20161.6	20807.2	20770.8
M386T33_2	386.244	33.34								14155.6	1227.16	8995.6	645.165	11115.1	4787.21	2459.21	10102.7	758.946	5390.75	5694.46	3314.07	4789.87	10113.6	4252.38	10150.7	9702.64
M199T32	199.168	32.237								6507.76	4312.82	12526.6	5988.92	7581.46	2658.37	3447.66	6636.8	5220	4401.13	4180.05	4530.46	8713.74	6934.2	6879.74	5832.83	8070.25
M251T3	250.986	3.3595								33687.6	24945.1	48374.9	39676.9	54682.5	21393.5	41563.4	48757.3	51150.5	53250.2	45151.9	45318.2	39003.6	44218.5	33749	41980.2	44205.1
M233T35	233.116	34.6485								11311.8	2954.24	2181.31	3230.89	2466.75	2205.89	9955.33	8470.6	2700.39	1748.32	9429.36	8837.17	3016.31	3896.59	3912.22	4150.47	4323.39
M527T341_3	527.487	341.474								60663	73471.7	62887.9	78259.9	65189.6	76230	75131.9	57766.7	67553.2	59334.4	71541	65453	55826.6	72649.6	69122.6	72640.9	72198
M563T32_1	563.42	32.16								6753.86	4270.92	3231.82	6724.6	5968.21	1169.14	16688.6	5786.43	16765.3	5027.15	6068.01	4800.18	7794.17	6309.26	6153.94	6001.25	6030.97
M316T33	316.228	32.7605								1025.44	5725.33	3697.76	3646.82	3756.87	1729.71	4073.36	5002.07	6874.48	3941.31	5336.16	6558.16	5385.09	4987.28	6186.06	6168.24	5911.43
M102T413	102.054	413.259								36190.8	45558.3	25606.7	19978.7	59959.8	45925.4	42813.9	52165.8	43324.1	49968.8	46494.6	59034.3	62028	54781.1	54773.3	62603	57869.6
M538T203	538.278	202.961								3486.56	29219	19801.4	11414.6	23135.7	24566.7	12462.8	8690.18	4099.03	13049.6	9482.33	10647.4	19591.8	10574.8	10500.6	10486.2	10707.1
M156T439	156.075	439.385								62296.3	114836	63944.1	37097.2	76670.2	68541.2	68651.8	64591.7	55922.7	57992.9	66591.1	58429.8	56213.8	78138.1	68888.3	68839.7	68896.6
M901T197	900.553	196.575								2411.24	4819.47	4702.38	4017.01	4141.37	3663.75	3853.85	3044.23	6375.6	1529.48	5901.54	1689.43	2273.02	5129.22	4562.66	4842.8	4354.91
M839T60	838.624	60.096								30421	46377.8	39740.5	53096.1	48004.3	61326.1	43116.7	44381.7	58021.6	31377.5	7617.3	43898.5	59071.5	61880.5	63406.2	59490.4	61761.5
M619T220	619.342	220.048								13924.9	4812.76	3210.41	8017.7	6354.06	4999.44	5235.05	25877.7	10152.7	2148.27	19165.6	4952.95	4256.91	7394.64	7398.93	7397.92	7901.75
M504T192	504.34	191.675								20213.8	23352.7	29960.6	18742.8	26811.8	26689.9	22628	21029.5	30955.7	15715.7	17764.4	22054	20942.7	27208.4	25968.7	24100.7	25406.6
M570T32	570.418	31.5515								6259.52	6869.21	9624.18	3942.07	6653.89	6042.88	8631.53	11268.4	9804.35	4563.76	4742.59	8202.22	9282.95	15584.2	16244.2	15730.2	15911.7
M968T420_2	968.156	419.661								16390.5	15641.5	17148	12554.9	12996.5	17110.7	13409.5	13531.6	14121.8	13320.1	13915.4	16971.3	13460.3	15381.2	15163.1	15439.8	14193.5
M885T341_1	884.518	341.278								31789.2	47000.9	31930.4	50712.4	37502.6	49703.9	45860.5	29467.2	41663.5	34819.8	43973.2	39778.2	23968.5	40407	40407	41984.7	40422
M725T139	724.523	139.098								44654.7	44684	42430.7	48859.4	47918.2	63599.7	37501.1	49786.4	54548.5	31980.1	50667.9	46144.1	38800.3	53171.9	51156.3	49567.9	49541.1
M651T420	651.104	419.725								26565.3	24610.4	26435.6	26415	26195.5	29801.6	24538.4	30550.3	23896.3	22830.3	25338.9	26085.2	21524	25246.3	25188.7	24875.6	24936.7
M1055T342_1	1054.94	342.119								90221	66268.1	90822.1	57348.2	94122.3	101459	63445.4	89941.2	54656.3	97808.7	97642.3	57463.1	91564	66717.3	85167	84985.5	85155.6
M1060T345	1059.95	345.331								39781.9	3695.97	6065.73	4271.56	44805.7	53024.8	4370.84	5572.39	71948.7	60832.8	48000.3	5526.82	3981.59	16981	29876.4	7787.67	32766.3
M540T198	540.244	198.394								1671.17	1719.76	2023.88	2174.19	2833.49	2820.21	3111.55	953.21	914.861	2207.91	1986.36	2779.39	1265.56	2128.47	2216.09	2160.52	2574.29
M507T448_1	507.052	447.922								19482.6	17437.4	22600.6	27558.4	19777.9	21104.1	16309.8	20359.8	17858.9	21056.4	20992.5	17274.9	21007.1	19252.9	19285	21603.2	19247.8
M520T27	520.351	27.304								11284.3	3794.25	6744.61	4709.25	4616.79	5181.81	19947	14077.6	15326.7	3047.72	15301.5	6508.53	5086.1	7334.2	12138.8	13177.2	13211.4
M828T175	827.692	174.983								48419.2	27101.3	46165.6	31919.5	30285	28906.6	26086.6	37337.3	31574	54965.1	31124.6	32709.5	45066.6	33923.1	33970.2	32121.6	31762.8
M867T155	866.62	154.937								8006.92	9258.46	10046.9	11129.1	10780.4	10742.5	9704.03	12983.2	13338.1	10210.9	13367	7660.53	11937	15144	13146.2	13174.8	13139.8
M867T159	866.535	159.357								7064.12	5282.73	12173.3	4392.46	6997.8	2844.43	5410.27	7630.66	6291.02	11830.6	6677.12	8707.18	8296.07	7628.99	7532.53	7539.99	8947.28
M867T135	866.595	135.154								4481.13	5450.86	4385.43	5676.96	2659.34	3788.17	4035.98	4458.66	5402.86	5424.04	7001.03	3758.34	5841.81	2155.37	3733.08	2166.36	2336.46
M173T51	173.07	50.97								27961.2	27290.2	25248.3	37819	21720.5	7269.25	30284.7	40293.6	31288.1	14477.9	31268.9	32704.5	15263	28533.2	21676.7	23336.3	24309
M755T40	754.531	39.857								9786.35	13959.4	5346.83	10102.9	10469	28773.4	15635.4	10426.9	8582.9	13652.5	4949.79	16445.4	18451.3	13434.7	13863.4	13428.4	13854.7
M560T202	560.331	202.292								9964.77	19575.8	11418.8	9861.4	4053.54	13092.3	4906.76	9071.03	22134.2	10853.4	14757.2	11852	11241.5	17027.4	17131.5	17218.7	17218.3
M351T439	351.011	439.452								6284.79	6323.06	7977.19	1630.58	3212.07	4539.92	3713.93	4520.84	4953.63	3057.07	3885.83	3747.22	3959.73	4098.41	3824.28	3770.07	3917.99
M773T113	772.581	112.915								37035	79554.9	82134.1	42361.5	26273.5	82508.2	86220.9	52710	102172	65542.3	101886	93837	137951	60890.5	93150.2	59892.8	67697.3
M655T387	655.083	387.18								19884.3	17114.5	19903.1	14730.5	12480.8	15649.2	17905.1	14963.6	18820.8	16133.9	16306	18828	17214.9	18751.4	18491.2	19007	18830.6
M765T312	764.66	311.587								45154.1	1033.73	758.629	1304.92	1555.29	1307.76	1046.26	23761.5	34104.4	32556.9	29918	641.5	28292.8	6464.92	21746.2	3379.43	21482
M420T35_2	420.308	34.701								4240.27	5926.78	3639.88	3260.89	4960.23	3521.3	4942.83	2787.58	2411.32	4019.08	8629.24	2626.9	7191.93	5182.97	5032.81	4220.44	5175.09
M938T341_1	937.5	341.439								34450.3	45676.6	33132.1	48836.9	39393.7	48076.6	47082.4	30444.1	47447.6	35246.8	47985.3	43854.7	28580.4	41106.1	41161.5	44703.9	41115.9
M1093T476_8	1093.41	475.841								22463.4	22466.4	18765.8	21851.6	5637.24	22419.8	18779.3	9442.64	27424.2	3849.81	23183.3	16124.4	1727.79	21764.7	20477.9	21407.6	16931.2
M221T385	221.017	384.73								27596.4	31010.2	22347	29517.7	31728.6	30024.4	35674.6	29876.9	26251.2	29770.4	30510.9	26862.6	24804.8	27962.1	29063.1	28916.2	28687.3
M973T32	972.789	32.07								18625.8	6303.34	39366.8	7709.56	17400.3	7269.98	9621.75	17812.3	2586.65	3573.77	4394.22	2119.72	17544.2	3398.69	3292.97	3396.12	2939.95
M910T488_2	910.408	488.19								8664.09	8409.9	5186.28	7955.93	6397.76	6697.89	9402.55	9968.33	8870.88	10074.3	8916.26	9442.76	5433.17	8805.04	8892.65	8913.04	10011.9
M803T341_1	802.515	341.42								36912	50472.4	37092.3	50806.6	42723.3	54186.2	49093.4	31100	52104.4	33647.9	43722.5	45004.9	33006.2	42689.1	42954.4	42926.9	43424.8
M802T342	802.47	342.043								3724.43	18064.9	22811.6	4451.66	5067.8	20174.6	5661.56	3130.68	4814.04	3464.97	5823.67	6657.18	2560.07	10123.9	5729.04	6169.22	6070.86
M818T175_1	817.696	175.172								52081.6	21746.6	45990.6	35257.4	27037.6	39589	30311.7	37777.6	31307.7	69367.7	36429.9	27434.2	69391.6	33664.2	28720.2	30380.4	27672.7
M1091T475_2	1090.66	475.312								15395.5	15782.4	12766.6	13273.4	2292.16	13752.3	13248.4	6403.74	25125.7	13404.8	15808.8	11887.5	587.68	14418.4	13958.6	14164.7	12465.5
M539T342_3	539.467	342.143								59072	67952.2	60744.9	50212.6	66802.6	71878.4	73447.8	57492.1	64953.2	62000.8	68854.7	62775.3	59768.9	65457.2	66315.6	66029.4	66314.2
M1060T190	1059.73	190.409								7994.05	7365.4	5960.53	9655.35	8861.35	7384.36	9308.79	8815.47	8033.32	6592.74	7303.8	8569.95	4948.44	7630.23	6944.12	6984.16	6957.9
M566T189_2	566.449	188.633								8339.62	10602.8	11061.6	7742.24	10168.9	9055.81	10310.7	16717.9	10269.5	12662.7	9312.63	9129.81	7934.54	11957.8	11987.1	11948.6	9434.37
M844T341_1	843.516	341.415								30205.3	41747.8	33410.3	53452.9	37973.7	45897.6	42624.5	28458.3	44288.3	31584.5	40271.8	40924.5	27585.2	38678.2	37132.4	38006.1	39025.5
M821T485_2	821.365	485.014								7852.32	10938.8	4894.35	11241.9	7638.6	7699.75	9625.95	8237.54	9045.32	8797.43	9974.25	9275.84	2778.63	9442.04	8471.54	9091.63	9418.08
M896T341_2	896.499	341.403								36251.8	51700.1	38440.2	54255	41827.7	55055.2	52795.9	35403.2	54147.7	39721.9	50084.9	43420.1	34579.9	47282.8	47765.7	48186	47308.2
M400T154	400.339	153.563								7838.82	39799.4	6406.9	38819.5	21750.5	28040	42125.8	5033.17	32849.9	8638.75	38475.1	30109.1	3761.29	34861.2	40714.3	36621.4	40149.7
M209T34_3	209.152	34.0385								1174.55	1459.7	1462.4	3445.94	2850.48	996.52	3147.9	3003.41	1385.54	1458.68	4761.74	1625.28	2570.89	4579.97	4580.32	4663.35	4793.34
M784T41_2	784.11	41.081								16390.5	20984.3	16038	22522.6	23016	21828.8	15875.1	11118.2	8178.22	17107.4	26582.4	25754.1	20789	29385.8	24222	24274.9	24168
M826T341_2	826.477	341.467								55285.4	65738.8	55581.7	68962.1	57702.8	70028.7	67056.2	53194.5	66099.6	53200	65733.8	62666.4	50075.6	60402	60175.7	60954	60176.7
M961T307_1	960.688	306.833								29960.8	25739.7	20901.7	16477	15209.2	17492.4	25634.8	14984	20198.9	19432.5	22231.6	33479.4	17899.2	27852.1	27851.9	28394.3	28380.9
M1073T190	1072.73	189.879								10903.9	10212.6	12996.9	8668.62	5678.04	7371.98	10094.8	8367.29	11061	9328.52	10930.7	10717.4	6725.9	10940.4	11091.8	10748.2	11087.8
M802T198	801.679	198.429								25918	19152.4	30474.8	10987	21263.9	13377.4	19882.1	21934.7	15768.8	20685.2	22222.2	15864.6	34143.2	14374.4	13537	12287.3	11954.1
M772T176	771.632	176.309								24465.9	33535.9	23741.3	20702.1	29561	32356.8	20404.9	25903.3	22082.9	33501.2	27012.9	21756.6	19319.5	27370.4	28092.9	28994.9	23561.6
M596T386	596.137	385.943								13360.9	14703.7	12461.2	13919.7	18635.9	13790.1	19717.7	15853.2	16026.5	15573.1	17105.3	16458	16595.3	15693.6	15861.8	15983.2	15794.1
M414T33_2	414.224	33.411								12265.4	8229.68	6599.48	3222.62	6165.36	4339.05	2851.74	5615.82	6679.77	4589.85	6187.11	6288.62	10215.3	8187.1	8187.13	8186.84	8371.85
M504T348_1	504.049	347.726								33738	31201.7	25697.1	31659.7	27285.8	33562.1	30348	29415.9	30624.7	27755.6	32905.6	29182.5	25055.2	29641.7	30229.1	30604.9	30603.3
M824T138	823.633	137.858								44508.2	48364.3	50924.1	46643.9	48693.1	36938.3	45508.2	51735.8	48185.2	25785.9	45491.4	40687.7	43856.3	47391.3	47401.1	47400.8	44100.3
M231T377	231.034	377.309								13148.3	12577.7	11498.6	9079.72	14274.1	14215.1	17865.5	10388.5	14018.7	14381.4	15179.4	14752.8	13393.1	14171.5	14732.1	14226.2	15900.2
M251T332	250.89	331.947								4101.3	3609.8	3997.77	3567.27	3777.04	3634.62	2949.76	3643.62	3568.52	4724.17	3650.79	4069.78	3773.55	3937.87	3873.58	3873.42	3873.22
M175T34_2	175.147	34.011								15395.2	3112.93	721.3	1234.13	11240.2	1326.88	2251.7	2694.69	18498.9	1006.57	14145.4	1153.58	11306.6	3385.9	3375.87	3275.61	2890.53
M979T341_1	978.501	341.403								31808.9	41367.2	32831.9	44580.8	34350.9	42848.8	45271.8	25676.6	38136.2	33469	39674	35900.9	26375	38816.2	37439.4	38898.5	38346.4
M785T342_2	785.475	341.507								52000.3	59622.9	51905.4	66467.6	55438.3	67757.4	66189.4	55852	63149.3	55930.3	64403.4	59146	47420.9	60889.5	61422.8	62830.3	60900.8
M615T34_1	614.551	34.077								1544.18	7431.38	2252.83	2187.16	2113.84	5380.83	5273.96	2238.67	1862.63	752.522	8817.77	6181.68	573.624	7071.06	7085.25	5251.48	6950.58
M399T377	399.083	377.31								12319.6	14963.9	11892.9	10316.5	15728	15788.8	17286.9	9607.29	14120.2	11276	15438.8	15304.9	9451.99	16077.8	15898.5	15929.5	16357.4
M580T342_2	580.468	342.043								67952.6	74457.9	65892.6	81575.8	74018.8	79906.6	80539.7	62702.9	75175.4	68410.3	76791.5	72865.4	65450.3	73544.3	73544.9	73557.9	74864.1
M657T32_1	656.52	32.178								11160.1	8065.04	4078	7061.52	6192.33	7674.19	9347.19	4675.71	4390.5	9264.07	8978.44	6342.39	7647.84	9957.58	7208.41	8454.49	8938.22
M688T32	687.567	32.1255								2902	10183.8	2605.28	4243.71	2599.55	2943.51	3603.55	2682.5	7475.89	1807.09	7736.64	3740.93	3133.24	6729.39	5481.47	7032.31	6366
M567T188	566.544	188.05								10985.3	14437.3	11415.5	12629.9	11670.6	8688.15	10006.3	12804.5	13709.3	11377.9	14569.3	11071.5	10058.9	14262.1	14307.6	14654.8	12692
M772T40	771.568	40.462								15383.1	14417	10557.9	12899.1	19856.6	32365.3	16927.5	12122.3	19343.8	10721.1	18986.1	11998.3	13261.7	17505.3	16946.7	16958.8	16947.2
M1091T475_1	1090.54	475.325								9844.01	12675.9	13442.3	11425.3	1730.16	10029.7	11501.4	2839.59	22821.9	11412.6	17502.9	10676.9	398.274	11367.3	11030.2	11499	9288.46
M1011T448_1	1010.59	447.535								8054.27	9247.39	7708.44	5931.89	7865.76	6996.84	6340.32	10255	7940.41	6038.58	6273.63	5837.83	5509.8	7319.43	7813.93	8857.89	7328.62
M222T160	222.057	160.147								13530.1	3123.43	33902.3	11275	23945.3	11561.4	6802.13	16972.6	34551.9	2401.53	11360.6	12121.6	1253.38	16547.3	16544.3	16689.1	16688.2
M608T171	608.388	171.289								1161.13	5706.68	1179.02	1401.76	522.404	2349.6	1018.43	2047.83	1119.65	1632.2	2081.83	2221.85	974.447	5106.71	4834.44	4988.57	5192.49
M283T373	283.082	373.473								21929.7	14633.5	15010.9	17652.9	15818	15821	12854.5	20124.5	15703	14490	31307.5	15777.9	17233.2	17617.6	17378.9	17269.1	17329.6
M255T35_1	255.062	34.802								4048.88	2877.86	5142.68	2256.08	3152.12	9349.74	5133.18	4265.39	6886.72	7519.88	3095.48	2173.2	2621.9	2685.13	1949.83	3213.67	3343.2
M280T234	280.153	234.29								10473.3	10794.4	8612.2	13158.9	8100.57	9502.87	11220.2	6107.75	13957.1	14233.1	9451.18	13100.4	13051.5	14103.9	14113.7	14255.3	14411.1
M159T411	159.075	410.979								53557.4	76671.8	67630.5	66536.9	91089.2	71133.3	76602.6	64038.3	64455.6	88500.8	76473.2	69966	73671.3	58738.6	62994.5	67276.8	67435.2
M435T36	435.243	35.927								3572.73	2712.95	3902.24	3098.61	2584.99	7731.99	10147.8	10922.4	6906.53	7199.06	10399.4	4979.97	2979.76	2512.59	4678.59	4771.74	5563.99
M699T448	699.026	448.04								16280.9	12412.9	19151.4	17127.8	15380.6	15047.7	13982.5	13026.9	13118.9	16221.2	13386.7	13704.3	14300.8	14369.8	14366.8	14736.5	14742.1
M674T182	673.523	181.859								15341.8	11799	7354.81	11070.8	7102	15365.9	13358.7	8992.87	11512.1	17395.5	14330.3	11636.8	14470.1	11810.2	11283.4	11841.3	11576.9
M800T41	799.542	41.0855								9513.97	16778.6	10558.9	12851.1	16583.6	32039.3	16304.6	17590.4	7451.66	17590.2	9525.47	10967.8	10679.6	16790.4	17848.8	15172.4	17769.8
M547T108	547.432	107.971								5351.13	5107.63	7556.18	8866.08	6310.17	5375.64	5285.3	4368.15	6031.9	1852.34	2674.17	3822.32	2823.72	4500.95	5030.08	4445.92	4448.57
M743T143	742.569	142.749								27307.9	32380	28841.9	24590.5	28437.4	24795.5	26638.6	26026.5	29236.5	16947.2	27023.1	23224	20092.7	26114.4	26136.4	28671.8	26908.3
M921T307	920.752	306.621								24015.6	22247	18331.9	14262	11077.2	14149.3	19444.6	11702.2	18094	12983.5	17014.7	28152.5	12373.3	23257.4	23135.1	23619.8	23610.5
M741T39	740.519	39.2425								22126.9	35093.8	28273.3	25899.5	23881.1	28889.4	34917.7	41590.3	26801.5	26320	29941.8	19546.6	39776.7	33871.7	25830.8	30001.3	26502.9
M394T175	394.292	175.04								23529.1	23576.7	9905.68	30592.7	19230.3	31660.6	29312.1	18835.7	13916.3	22086.5	14774.9	18056	16588.7	19468.6	18419.4	19484	19485.6
M867T341_5	867.478	341.474								50819	56492.7	45400.5	57397.9	55490.5	60384.7	58696.8	45842.4	58229.5	48890.2	54853.6	54998.6	43942.7	54980.8	52420.8	54793.2	54430.7
M458T33_3	458.359	33.495								4837.84	5920.48	3804.44	6674.14	6556.33	5390.96	5676.53	4222.33	6025.46	4959.81	6857.84	4418.9	3719.42	6378.21	6044.94	5856.11	5840.34
M879T135	878.563	134.802								11338.1	9286.89	13712.7	10065	10671.4	7509.38	10824.3	10981.5	10620.8	7107.71	10845.8	7144.8	10114.7	14115.5	14868.3	13931.4	13718.8
M371T448	371.073	448.457								30607.2	23734.9	31442.5	29247.9	34072.2	23637.3	22375.7	33054.8	29100	27827.6	25311	33709.2	31881.8	26603	28427.9	29192.5	29141.6
M318T394	318.127	394.46								6694.91	8370.11	10562.3	8003.98	9185	9068.67	6709.95	7533.36	9453.73	5826.94	8068.99	6227.38	6560.57	8721.82	8089.23	8085.25	8089.15
M845T344	844.948	344.064								490.695	814.54	359.153	12130.3	10366.3	357.653	805.54	797.663	513.455	453.881	263.886	8835.54	269.729	1526.11	4391.08	1682.21	1787.7
M693T379_1	692.895	378.541								4535	5353.15	9170.16	2403.96	2115.77	1331.31	4725.77	1881.48	4080.89	8113.36	3387.46	3438.55	1363.03	4454.86	4167.02	4456.58	4453.08
M772T39	771.601	39.244								8400.93	22149.1	12875.6	14364.3	19074	27170.6	14639	9982.42	20386	17199.8	19606.4	11079	9235.04	15951.9	15274.4	17229.9	14255.7
M800T152	799.663	152.407								61878.6	78300.9	70340.7	74593.1	66376.4	51542.5	76698	56678.8	97125.3	57078.4	75873.7	80819.3	50474.3	84699.1	82264.3	83459.6	76633.6
M833T156	832.578	156.132								53082.8	55319.2	61251.5	49579.7	64713.4	62859.2	60313.8	52823.3	61743.4	64895.9	61069.2	57311.3	65953.4	59790.5	59433.1	59616.8	59792.1
M354T35	354.334	34.6375								1845.64	1953.84	2459.57	2662.69	1933.52	1925.78	3223.29	7535.01	4536.22	2777.32	12268.2	6674.2	5868.66	8941.46	9136.8	8940.15	10504.6
M324T244	324.075	243.559								64082.8	64114.1	73226.7	65207.3	117402	101035	53769.8	36255.3	64774.8	124953	73885.5	61414.5	38292.5	82789.9	81293.8	86907.5	87412.3
M432T91	432.278	90.762								17519	19211.1	24997.8	4992.81	17443.9	20776.2	9435.59	12582.8	7128.67	5216.66	18462.7	6687.94	9135.08	18355.7	17237.2	15546.8	18127.5
M262T401	262.127	401.184								12921.4	9766.88	8545.85	9055.73	7161.2	9572.84	8277.03	10602.4	9466.21	7161.56	11952.7	8205.31	8397.22	11762.1	12539.3	13137.7	12254
M394T164	394.205	164.442								7347.8	21129.9	15366.1	15128.8	40789.4	15649.4	15601	10806.6	27746.1	12594.1	21114.6	21437.6	11796.2	20720.9	21799	22465.3	22851
M860T38_1	859.597	38.008								3789.05	6579.67	4043.56	4206.98	3759.7	11912	4481.3	4859.17	4628.46	12973.4	4319.47	5155.23	4325.54	5946.25	5685.36	4797.16	5911.61
M480T34	480.266	34.141								5622.95	1721.02	4224.09	1051.49	3353.71	13827.7	13410.5	16748	12276.1	9300.66	11069.5	5793.28	4298.47	8312.97	8402.4	8547.35	8546.28
M1137T342_1	1136.95	342.013								62498.3	68986	66177.8	40261.8	69440.2	41724.7	75980.3	67424	76564.7	72598.5	71223.4	75729.8	66347.7	66126.8	66005	66009.1	53481.3
M349T27	349.214	26.6695								16542.7	29528	12321.4	28584.1	16810.6	19378.4	5769.6	7166.95	6531.2	16906.6	15557.3	2682.88	7351.64	14347.1	14210.5	14119.3	14339.4
M368T436	368	435.582								12707.6	9321.77	11569.7	7094.97	4291.67	4988.75	5003.5	5985.14	5089.66	4250.2	5500.93	4889.52	4825.25	5641.39	5690.33	4460.29	5056.74
M829T65	828.548	65.2895								12661.2	37634.2	12883.6	20856.5	43741.2	63384	23405	20417.6	19408.2	35510.2	27550.6	12195.4	23356.9	21980.3	22088.6	21954.2	24901.9
M858T200	857.51	200.276								12143	14870.6	13148.7	11279.3	13361.6	12581.7	12600.2	12678	14882.1	9666.39	14747.4	11929	11843.8	14551	13817.5	13822.6	13819.2
M1142T341	1142	341.396								31595.1	41157.3	32783	46738.5	35864	48423.7	45148.9	31102.1	44803	32869.4	48183.5	36004.3	25755.6	40289.1	39518.1	39938.2	38900.9
M515T385	515.21	384.825								14088.9	21349.2	10885.5	19457.2	26778.2	12815.9	32941.2	20060.8	17801.1	18391.2	23419.2	17044.4	13703.5	17378.9	16560.7	17897.9	17652.5
M716T178	715.569	178.303								13116.6	13980.9	10308.7	13254.7	12291.1	23553.4	17281.8	11132.2	11564.7	15660.9	13930.9	15916.6	11453.9	14345.7	13733.6	13345.2	14521.7
M572T46	572.431	46.164								3643.1	1182.76	3418.43	1403.57	2585.29	544.051	1809.96	3515.84	2911.11	2020.59	3050.54	2603.32	5997.29	2547.34	2540.58	2648.73	2844.46
M1012T194	1012.45	193.53								4330.93	5849.07	6617.69	4799.87	6095.8	6949.35	6801.01	4961.09	10412.4	6936.6	6628.97	5370.13	6062.31	6844.21	6846.75	7076.42	7321.27
M560T203	560.259	203.039								1846.77	11634	9591.37	5055.16	11224.3	11207.5	7309.71	4956.61	1967.02	6800.71	5149.92	5251.16	9010.11	5843.74	5836.73	5689.12	5843.05
M621T342_3	621.47	341.516								61562.5	63300.4	58165.8	72337.8	67957.3	69026.1	73263.1	60138.2	71414.3	60094.7	67877.7	66333.3	60518.8	66304.6	66293.7	68125.4	66303.6
M347T454	347.015	453.724								22097.9	33762.7	29343.3	5397.5	26469	23770.1	25855.2	22603.8	22607.9	31892.4	25300.7	22898.2	24788	25268.4	25416.7	33480	25597.7
M366T35_1	366.21	34.79								3561.93	713.428	2726.09	1070.48	1104.04	8921.11	10774.1	10594.3	8057.34	5710.96	6404.15	3424.29	2565.88	5799.79	5357.9	5961.63	5963.75
M1043T342_2	1042.96	341.509								52286.1	59674.9	48486	60240.4	53118.5	62595.6	61169.5	51120.4	57448.6	52291.8	57477.5	57206.2	47458.8	57330.9	57888.3	59174.2	57331.6
M115T166	115.049	165.999								22655.1	25931.7	22090.7	23825.6	17577.4	12165.7	28063.5	14303.1	20516	14747	21127.8	19699.3	16081	21643.2	21496.5	21904	21907.9
M1018T34_2	1017.8	34.154								10444.8	5969.32	24501.3	6982.52	6206.82	5200.65	6701.83	6116.22	4646.15	6935.21	6554.49	5874.16	5385.34	7841.3	5924.74	6794.09	4899.45
M384T204	384.272	203.706								14894.3	14071.6	7206.12	15346.9	16508	15571.7	21799.8	12152.5	10566.7	9985.58	10544.6	13107.1	12991.5	14056	14331.3	14410	14255.2
M721T42_2	720.584	41.684								26390.5	28086.3	22691.8	23566.7	34794.8	49019.1	17438.9	29431.6	27743.7	17937.3	24225.6	21942.2	22761.8	23410.8	23410.3	23543.6	23887.4
M1074T189	1073.74	189.262								6618.37	16035.4	9184.82	9613.95	8031.44	9683.13	12784.8	11488.2	11536.7	11368.3	13337.5	13949.1	5886.71	13885.7	13905.9	14546.7	15923
M653T329_1	652.8	328.857								6870.97	6682.66	7684.34	2198.95	2903.11	3511.51	5637.67	4089.74	4951.86	12925.6	7792.38	6856.93	3830.06	7131.56	7367.01	7514.53	7512.87
M438T35_3	438.376	34.7965								4739.37	3785.85	5231.02	4661.84	5723.75	4506.28	5028.54	4182.29	4797.14	2903.79	9164.79	4306.58	5359.48	5937.9	5537.72	5196.71	5222.98
M363T34	363.153	34.165								520.305	887.466	1253.75	1205.61	1139.85	927.617	1041.4	1931.71	776.452	1288.3	6248.66	5019.56	15763.9	4008.28	3971.75	3918.57	2338.58
M763T347	762.958	347.162								3827.57	28808.2	2949.05	1763.02	36911	46983.6	1757.84	2592.53	26787.2	3096.82	40124.5	2999.07	1630.16	8978.32	21735	21574.4	10585.5
M937T346	936.951	346.294								8782.96	249.958	2015.2	1958.63	5784.12	1599.6	12313.1	2916.36	1283.15	1136.13	2435.34	6985.26	2774.76	3352.49	2017.63	2085.39	1823.23
M615T197	614.518	196.56								4894.55	9769.6	5454.8	7576.32	5041.55	3872.54	4084.82	2075.62	7472.77	3309.66	5289.72	2250.53	3439.5	5479.78	6805.01	5332.53	5291.8
M603T34_1	602.583	34.09								5885.29	4851.73	6204.74	4872.35	7630.75	4929.15	5429.05	7946.99	4548.82	5057.69	8504.91	6772	7640.87	6167.89	5843.86	5798.69	5572.96
M203T335	202.968	335.046								40200.8	37043.2	35948.7	35289	31513.8	40281.1	37622.9	38764.1	40289.8	32711	34296.9	42872	41041.8	40281	40673	40277	41729.7
M275T357	274.909	357.338								95534.2	96874.3	93365.2	91072.5	102992	101504	101446	96773	95101.6	102364	98400.8	103365	102101	98317.9	98705.7	97248.7	98781.7
M362T386	362.082	385.942								21630.5	26433.3	15958.2	20034.3	25780.8	16704.4	32939.7	21928.3	21169.3	28173.5	20926.6	25127	19571.1	21898	21899.4	22694.6	22163.1
M604T347_2	603.928	347.248								78381	47863.4	48932.4	47204.8	50576.6	56801.7	53458.4	79410.1	81801.3	53853.6	49905.3	50559.1	81185.4	49058.6	48919.6	49058.2	48254
M569T33_2	569.427	33.4995								3588.21	2941.4	5857.77	4113.14	5215.04	2546.63	3313.77	4762.44	4886.01	2753.38	4834.14	2345.91	2585.64	4509.75	5066.12	4741.55	3668.51
M803T41_2	802.62	40.6655								28262.6	21704	17198.2	20393.5	19464.6	22852	25443.6	31602	25932.7	24180.8	25789.1	14754.1	19156.5	25694.3	25799.5	26899.9	26536.4
M838T342_2	838.457	342.083								38128.6	40438.2	35919.5	25443.6	39679.4	43835.4	43738.5	39951.3	42825.8	37849.8	43503.9	39386.5	35142.7	40513.5	40517.8	40494	39311.9
M788T43	787.716	42.9285								8140.6	11294	9334.85	9576.49	11694	18348.3	8275.33	4699.63	4910.15	9790.79	13354.8	14946.7	9745.87	12952.3	12916.3	6226.45	12842.7
M442T33_2	442.256	33.3155								7083.4	3434.16	8496.17	4898.8	5024.68	3065.76	3159.16	4683.77	5419.22	5612.16	5447.89	6409.77	6233.47	4433.42	4399.14	2592.83	4386.9
M882T199	881.588	198.999								9557.16	11772.7	9275.13	11385.9	9147.96	10022.5	8963.66	8691.96	12255.8	7756.93	10380.8	8690.18	8946.45	11200.6	10080.9	10088.4	10081.7
M1055T190	1054.7	190.5								7705.4	8897	8191.84	10355.4	6244.82	10840.4	7918.74	8255.57	8005.36	9527.05	8137.3	9977.86	8342.96	8330.04	8264.66	8496.91	8494.89
M218T71	218.091	71.0715								92636.9	90730.2	71597.1	129099	92813.5	25296.6	98636.8	96096.1	52704	81824.8	88601.5	88477.7	69877.5	62520.9	54705.3	62396	1971.28
M644T48	644.489	48.381								2720.65	3387.01	2870.51	1966.82	3020.97	358.432	3613.31	3974.02	2123.88	1639.5	3158.35	2135.98	4497.44	3021.5	3408.28	2937.42	2932.21
M680T448	680.053	447.875								11598.8	12069.7	10322.6	10630.9	11308.1	13474.7	12224	12776.1	12170.6	11072.9	9222.47	8885.54	11684.5	12428.2	13319.1	13101.6	10711.1
M522T349_1	521.925	348.568								69957.4	77471.5	70177.7	43453.5	50244.3	49295.4	51065	45502.1	46132.7	51434.6	50961.7	51772.8	50944.8	48790.8	52494.3	48815.9	49529.5
M507T461	507.121	461.397								2672.65	2831.1	2327.63	1797.71	2858.65	2339.34	2944.34	3431.49	1617.76	3391.11	2603.34	3069.73	2743.94	3092.28	2817.35	2972.84	2926.57
M841T39	840.635	39.233								11522.8	17853.1	14418.6	15801.4	12923.5	9657.24	11840	13285.3	15436.2	12992.1	12381.5	11596.7	13279.8	14390.1	14891.7	16671.1	14334.1
M705T384	705.242	383.584								9801.93	17637.3	7714.28	14158.3	17983.6	11746.4	18022	8808.21	10520.3	9729.19	13613.8	11131.5	6908.47	10821.5	10724.3	10819.5	10769.9
M129T35	129.053	34.87								11537.7	6797.33	8806.3	9764.96	9032.87	11120.9	15618.5	11073.5	13015.2	8390.09	13111.5	9014.26	11122.9	9717.35	10360.6	9716.65	9847.91
M594T184	594.445	183.848								13388.4	14335.9	12275.3	14535.1	13846.6	15030.6	16128.6	13402.5	17677.2	19868.4	14394	12982.7	11800.1	17061	16973.6	16480.2	14560.9
M776T39	775.547	38.631								10225.1	11021.3	6954.92	13901.1	11625.6	26104.9	43758.9	9764.12	17822.8	31493.9	37709.2	32986.2	7876.43	26573.8	22980.6	26642.6	15893.5
M314T193	314.23	192.913								4688.69	2705.26	2603.64	7220.46	5978.31	7209.08	5748.93	6125.02	8354.07	3432.11	2149.92	3288.95	6173.6	6119.84	5849.68	7047.67	5852.82
M908T341_2	908.479	341.499								40994.7	48195.8	45241	56453.8	48846.7	53188.7	57576.4	41277.3	54264.7	45823	50352.7	47833.1	39948.6	49255.6	50210.8	49803.7	50498.1
M818T40	817.639	40.1285								5940.38	5430.77	5392.07	7856.82	8324.61	3941.93	10102.6	7183.58	10812.1	2918.04	12059.4	11094.1	12578.9	7762.05	7948.84	6739.53	6634.06
M247T166	247.091	166.097								28556.5	31906.5	27598.9	27777.9	20374.9	15466.7	34857.2	16808.1	22694.6	18317.4	27174	22729.3	19348.1	26228.6	26223.6	26821.1	26475.5
M377T430	377.009	429.838								3597.08	4847.95	4840.16	7202.02	3236.67	3174.72	3914.6	4154.59	3611.78	2680.12	3819.9	2636.82	2579.68	2727.94	2265.99	2404.5	2254.42
M148T366	148.041	366.326								21367.8	14969.7	15982.9	26178.8	19127.3	14343.4	13152.4	30112.9	17217.7	10808.9	19506.7	11548.4	17334.8	14386.4	13920.8	13372.3	13330.9
M531T338	530.977	337.606								51631.6	56784.6	47741.1	57666.7	44164.4	50548.9	48206.6	38183.9	57547.8	43145.6	58121	59326.3	39345.2	48374.4	60673.2	60537.4	60528.2
M354T32	354.278	32.376								5573.36	5277.31	2862.73	3271.49	6872.59	3031.18	9526.29	5030.15	6429.33	2536.48	17594.1	2036.11	9242.42	9592.51	9138.79	6185.95	8180.52
M192T312	191.981	312.064								32749.6	27618.7	20215.6	23399.7	34781.4	31873.3	31371.6	27618.5	31091.5	21920.4	33185.8	30256.6	26729.4	31992.5	33700.5	33964.3	33953.8
M407T295	407.073	294.528								5891.65	5945.48	8045.56	4248.31	17562.8	11531.3	8922.78	9391.63	9333.9	14556.6	8322.27	5391.27	13038.8	7362.66	8210.09	8262.68	8384.03
M463T387	463.122	386.839								18225.8	15992.6	15760.3	14799	15390.9	13676.7	15911.2	14512	14507.8	13160.5	15810.5	15970.8	12567.3	17511.1	17004.8	16994.7	18486.1
M927T197	926.519	196.563								2593.16	9679.5	7007.24	7545.03	5648.54	7357.68	5491.97	2540.99	7662.81	6652.3	7224.2	6164.92	2711.14	10489.4	10136.9	8473.28	10504.4
M862T38_1	861.614	37.767								2978.96	4787.93	4679.61	4597.21	4102.27	8014.41	4909.23	5579.11	5075.1	5783.23	3360.7	3153.17	4569.84	5565.66	5559.04	5867.07	6177.07
M991T388_1	990.528	387.552								16417.5	13918.2	6896.98	9482.04	9575.18	8095.39	7924.98	6608.72	21778.3	9766.55	12514.9	16304.6	669.754	10159.3	10405.5	11537.5	10557.4
M633T32	632.521	32.207								10529.9	5332.99	5100.25	7784.61	4938.57	10601.2	8519.16	5534.37	5959.79	10991	9616.02	10786	10303.1	6632.91	6388.1	5951.03	6833.33
M579T345	578.957	345.017								124158	83753.4	109916	81513.8	102578	126394	69262.1	74289.1	82187.7	117468	74295.8	69832.4	106726	93923.3	107044	108215	108202
M147T266	147.116	265.785								4034.85	4617.55	3017.11	3466.14	2336.49	3890.79	3282.34	3696.73	4141.7	3226.72	43759.5	3882.23	4600.05	4266.69	4815.23	4892.4	4886.8
M334T387	334.081	387.133								36550.3	35454.4	35672.2	28101.2	29055.7	32680.1	33297.9	31862.2	37086.2	33081.1	32463.8	36188.6	32422.9	34505.3	34394.5	34506.5	33326.5
M383T34	383.183	34.084								867.517	946.513	651.348	2143.17	1099.59	963.565	796.888	1004.82	1765.21	657.64	7362.56	1536.51	1469.09	1915.25	2078.52	2956.3	1897.23
M1183T341	1183.01	340.89								26615.6	35425.4	27269.3	39829	29472.4	39456.1	38076.5	23582	36020.3	26280	30775.2	32180.7	22192.8	32202.5	31915.3	33199.6	31932.4
M950T33	949.793	32.778								13898.1	3073.04	27891.6	4683.78	12407.9	4682.32	7473.73	14084.2	2047.24	1795.07	2861.21	832.351	15572.9	1258.81	1082.61	1034.82	987.544
M1084T342	1083.96	341.505								41548.9	50952.7	45769.3	55822.3	46720.5	53498	55900.4	42055.9	50787.4	47185.4	52487.9	51419.8	42995.5	48558.6	48862.5	48697.6	49777
M647T449	647.096	449.077								10955.8	9565.42	12072.4	23218.1	4503.71	6482.5	4906.92	6660.18	8165.9	3778.21	4828.88	5154.22	5505.6	5382.97	5285.57	5286.39	5796.81
M415T348	414.952	348.066								98845.5	108083	97845	96903.4	73061.7	67349.4	63233.4	102030	110291	106933	121164	62637.1	68307.1	100950	90632.8	76485.9	86108.7
M413T34_1	413.303	34.1515								12394.4	6931.48	2409.17	7479.14	5226.93	5605.7	4741.46	3342.58	6194.2	9192.47	8959.87	6858.94	4341.2	6662.41	6915.88	6886.65	6131.85
M306T34	306.278	34.003								5131.83	6106.22	4782.87	7348.18	5421.2	1021.16	8358.62	4145.6	8198.82	633.247	9951.58	6641.02	4518.72	6824.67	7187.86	7095.96	6764.2
M188T291_1	188.069	291.01								22662.6	33872.2	49216.4	33271.2	16764.9	44412.2	53769.8	21838.8	42356.9	40686.8	68370	79469	19086.8	49020.1	49018.9	49059.2	41582.7
M602T189	602.344	189.299								21143.6	15697.2	18432.5	22072.7	13622	18560.9	20278.3	21032.6	19685.9	20880.2	14174.3	17882.3	19107.3	14674.1	14703.5	14708.1	17099.7
M1154T341_1	1153.98	341.396								34009.7	43454.1	35778.3	49029.1	43028.7	47290.6	47574	32145.3	49929.3	35897.6	45674.9	41961.5	27723.6	41160.6	42852.4	42433.9	43737.1
M469T33	469.219	33.339								11020.5	4002.4	4899.94	5603.67	3199.08	2233.36	3570.97	3917.89	5865.93	4588.84	4479.58	4089.64	5328.04	5504.15	5505.01	5500.3	6094.27
M573T33	573.483	32.699								12325.8	6985.43	5434.5	6079.96	7096.54	5776.55	11500.7	8798.94	5500.68	4979.59	9813.37	8804.16	14936.8	6388.72	5137.52	5120.59	5487.23
M926T341_1	925.52	341.403								26120.7	37863	29261.5	42755.4	31092.1	37938.1	37278.2	25921.6	38540.9	27058.2	34654.3	33169.1	25555.6	31673.1	31639.1	35463.2	31671.6
M243T295	243.052	295.029								1803.88	3349.22	1269.91	2070.58	1026.92	1642.11	2473.8	1370.64	2036.7	1771.44	2833.8	1893.92	1077.99	2937.46	2573.95	2581.57	3357.83
M833T348_2	832.896	347.866								44002	46300.7	68643.7	43580.1	45893.6	78457.6	47210.4	75231.1	46545.5	47619.3	51785.8	45391.9	52018.4	50039.2	47161.2	45862.3	47256.7
M234T430_1	234.357	430.217								16479.3	25898.1	12463.2	2116.76	24067.9	31740.5	29269.7	25075.4	22249.4	18975.4	28584.7	26821.9	24584.6	33805.8	33754.1	36662.9	36122.6
M449T337	448.975	336.976								44823	36359.3	42279.1	44148.6	36476.9	53745.9	42827	33608.3	51338.7	41268.8	44897.2	52639.6	35210.6	50724	50720.4	50775.4	54936.1
M634T306	633.983	306.016								34274.2	32761.2	35044.9	31873.2	28803.3	30610.8	30461.3	24517.9	33986.1	31316	30905.7	35806.7	33403.9	34408.9	34807.1	35063.9	35061.7
M620T32	619.524	32.2605								4590.53	6089.71	12258.9	7780.5	4867.59	8337.9	10648.7	3646.58	12414.5	7630.57	12948.4	6290.42	12344.6	9273.66	7474.99	7971.8	7946.88
M768T346_1	767.933	345.913								37662.6	40535	37378.8	36850.2	39013.3	37585.8	33491.2	38898.8	36824.6	42709.5	40698.1	40142.5	36154.7	52447.1	41686.4	41772.5	41669.5
M232T205	232.06	204.59								6159.9	684.721	4126.84	1393.9	10276.7	1616.9	959.872	6432.17	1295.13	1043	1695.33	891.901	1183.5	3551.3	3493.73	3551.33	3438.78
M173T287	173.091	286.54								12827	13326.5	14558.8	10569.1	15944.7	17044.9	15844.7	10958.5	14371	17655.7	14123.4	15111.5	14101	14240.1	14240.1	14359.4	14360.9
M377T409	376.991	408.656								13701.8	9682.71	15395.1	24448.7	7880.81	8270.23	14419	7793.66	8930.75	6922.06	8178.35	8009.76	6784.88	8566.91	7953.67	8791.24	6600.29
M751T335_1	750.893	335.01								22814	24474.7	23765.3	23368	23810.2	26377.8	25938.4	26195.1	24861.7	24167.1	24043.6	23100	24211.6	23902.2	23898.2	24548.9	24309.1
M414T34_2	414.317	34.4005								6091.24	2362.11	3095.32	3857.67	2783.34	2538.9	3858.85	2558.71	2401.89	2950.95	3798.38	4872.55	4584.22	3848.24	3916.65	4783.28	3845.12
M550T188_1	550.326	188.008								9409.81	11749.2	11703.4	7241.35	9271.19	6430.23	11738.5	8763.43	7886.03	11874.6	11227.2	4407.79	7102.83	8496.82	8399.93	8494.99	8184.59
M1076T190	1075.68	189.866								8766.63	8815.36	10842.3	8229.63	9063.57	8319.1	8706.26	6955.49	9230.25	10598	6581.24	7626.17	9488.55	7724.14	7160.24	7476.38	7758.29
M293T32_1	293.101	32.182								4312.75	5757.86	5098.42	3645.04	5379.71	4039.06	4575.76	5582.51	5305.15	4853.27	4175.42	4115.58	2680.22	5830.53	5845.67	6036.95	6718.55
M553T384	553.165	384.13								10238.6	13927.7	5814.62	12741.7	13224.6	9806.3	18919.1	9797.25	12215.9	10206.2	11733.8	11402.2	6594.88	11235.2	10878.8	11095.8	11562.4
M967T341_1	966.52	340.878								26628.6	38582	28001.2	44022.7	30255	37392.4	39981.2	24979.1	36202.8	27496	36847.9	32887.3	24022.7	33342.5	33862.5	35774.1	33025.2
M219T168	219.173	167.678								28698.1	23051.4	19850	18733.3	16401.2	17528.5	20122.4	26185.1	26439.9	26158.1	22113.4	30229.9	27245	29603.7	29604.4	30284.3	29604.8
M522T336	521.925	335.612								27601.5	28346.2	26006.8	27681	28752.4	31569.7	30113.7	25847.6	29816	29685.9	30236.4	23034.1	29865.2	29616.9	29636.5	29724.1	29617
M398T301	397.885	301.3								12590.4	8531.09	7297.92	7964.22	2193.19	2666.59	7093.25	6031.99	7310.92	1868.63	6959.76	6488.88	3090.1	7536.31	7580.05	6757.92	7199.09
M412T35_3	412.3	34.6485								5211.28	6834.83	4879.81	5475.39	3616.77	7087.49	6514.87	4115.28	8264.89	10357.5	2845.14	7752.94	5685.76	8213.55	6724.91	7978.81	8200.66
M339T33	339.206	33.377								7392.6	6405.87	3674.7	2840.15	2580.54	7497.86	4263.64	562.805	8633.73	4648.53	5089.96	5871.27	10560.7	5643.84	6196.78	3792.79	6157.27
M1043T346	1043.05	346.494								1420.26	37081.1	32920.3	40027.6	37145.5	44016.5	2350.48	1173.72	34584.2	1308.81	32983.6	39337.6	1716.4	36706.3	37288	37861	33411.4
M1093T476_7	1093.29	476.26								19978.8	21767	17812.9	1385.1	4242.04	20802.1	1280.33	8768.14	25675	18582.4	22343.7	16616.5	1031.33	20807.6	19377.5	20378.6	15097.9
M885T490	885.391	490.358								5650.46	8148.36	6577.82	12459.3	9774	5952.49	7762.33	8332.19	8296.77	8093.24	8400.37	9082.28	6820.14	7971.73	7974.54	8023.35	8508.44
M884T342	884.472	341.976								7373.28	7586.31	6917.11	44442	35947.7	43789	6107.26	1531.59	5876.52	4188.63	8035.59	34996.9	2861.03	4585.1	4994.66	4270.57	4241.13
M477T34_2	477.376	34.121								3475.72	5773.33	10574.2	4912.9	7546.41	4942.97	4139.5	5129.88	5015.25	5813.25	5179.36	6456.76	7752.69	5431.73	5808.38	5431.95	5483.88
M719T40	718.569	40.487								16480.5	22327.4	12631.5	20304.8	17309.1	21654.6	17365.7	16658.3	23373.6	14406.8	18634.1	14669.5	19680.1	20072.2	20416.2	19108.8	20350.2
M585T34_2	584.508	34.0385								5848.26	5856.72	6311.78	6301.53	5508.82	4139.08	6694.44	5921.93	6202	1568.57	8802.04	5016.94	5489.05	5451.8	6416.05	5159.68	5109.13
M401T331	401.122	330.729								2404.04	1766.76	3498.52	1431.43	7165.32	3619.82	3943.46	3676.24	2640.05	18377.8	3077.73	2874.53	8704.51	3271.09	3736.75	3429.21	4320.93
M1020T341_1	1019.5	340.902								27368.1	37719.8	28225.8	41531.1	32136.8	38875.2	40597.3	23322.3	35912.9	27284.5	33911.4	31314.1	25815.1	34703	34698.2	35885.3	34706.6
M1019T344	1019.46	343.809								26490.8	33943.8	6064.14	2295.52	1206.75	38905.9	4589.14	4290.15	2986.85	4360.94	34094.8	29860.8	3382.6	33749.4	33752.9	35138.5	34095.4
M162T191	162.056	191.018								4743.18	5460.74	7115.9	1900.37	5780.17	5494.57	6658.86	11044.1	5346.44	4608.13	5390.45	4835.12	7135.17	5500.35	4568.66	5298.69	5488.93
M302T251	302.194	250.684								27877.8	25359.1	12876.7	32590.2	14974.9	21338.8	26013.6	21627.8	24482	22274	23173.1	24190.8	24819	23112.3	23321.8	23523.9	23521.8
M534T198	534.291	197.793								6744.46	5443.89	4543.04	4250.09	8707.76	7301.49	6670.25	14021.2	12460.9	7739.82	5497.22	7682.06	21854.6	8984.6	7517.12	8184.47	8484.21
M521T191	520.707	191.054								13294.7	10962.5	12875.9	13180.8	11041.3	12710.5	14520.6	8462.71	9449.38	11483.5	13515.3	9749.47	12305.2	11150.3	14159.1	13632.1	15026.1
M590T188	590.317	188.05								6491.44	10464.6	9378.17	6785.64	11677.1	8558.44	14514.7	7772.61	10018.7	6529.09	8818.4	7231.73	5914.64	11510.2	11319.8	11317	11574.2
M281T28_1	281.054	28.242								1711.98	2853.05	2358.22	2832.68	2524.7	1823.65	3078.98	2671.57	2846.88	1139.76	2954.23	2080.98	2822.87	2659.15	2777.34	2914.16	2914.54
M683T85	682.557	84.806								48973.8	25833.9	28846.6	24926.8	25666.2	14640.7	26316.1	42555	25766.3	25465.8	27788.1	25893.5	60847.4	25887.1	25906.1	24687.9	22993.5
M422T172	422.323	172.294								24543.9	21729.5	9834.84	23316.3	17838.2	29144.2	28318.6	19151.9	13695.6	23734.5	16059.3	21018.2	16976.8	17036.6	17036.3	17771.4	17036.6
M191T377	191.039	376.701								52419.8	56682.5	61312.2	48043.1	60632	62251.3	52538.5	48059.7	46434.3	55301.7	54063	51289.7	47414.9	54815	54814.6	55425.6	56265.7
M372T35	372.309	35.343								4024.27	3955.9	3715.94	2675.25	4582.31	4964.17	2906.24	1802.7	2781.27	3421.58	7259.64	3617.91	513.089	4155	4351.89	4148.85	4655.67
M841T139	840.635	139.274								31474.8	33241.3	28140	37434.3	35835.7	26946.4	36581.7	38098.1	30140.6	26301.9	35057	30100.3	29668.2	32785.7	28397.4	32788	32774.8
M821T40_1	820.521	39.823								9855.55	18141.2	13271.5	12797	26836.2	25865.3	11200.5	15537.6	14591.9	43478.6	10683.1	8413.12	13704.2	15396	15873.8	15538.3	16717.6
M773T294	773.073	293.507								4079.21	1839.04	2311.27	491.195	10328.6	5267.7	5748.86	5059.43	2719.03	17873.9	4276.83	4454.04	12662	4256.72	4663.6	4860.83	5359.5
M323T446	323.055	446.011								2189.52	1116.91	2001.76	12683.4	1570.49	1589.04	1120.3	1470.3	757.041	1637.42	1952.71	1364.52	1383.87	1374.73	1302.74	1459.7	1318.58
M391T342	390.991	342.116								49883.9	55885.4	52675.9	60482.7	55009.3	61123.8	41168.5	32896.2	58669.8	51694.4	56470.6	32257.2	47369.5	57766.2	58089.9	58889.5	57781.2
M1017T34	1016.8	34.12								1044.98	6093.46	17090.1	11511.9	13799.4	1769.98	8330.48	11181.8	8062.6	3973.3	9326.94	7334	940.941	8219.45	8865.72	8629.77	7657.41
M618T386_1	618.12	385.542								14504.8	15347.6	10062.5	12494	18971	15744	21138.6	14993.4	16072.3	18012.5	17154	16144.1	16109	15565	16333.7	16269.3	16332.5
M1130T341	1130.02	340.876								28732.4	38765	30280.1	44172.6	32375.8	40376.5	39656.7	26256.2	37639.2	28303.2	36852.6	33895.5	25255.8	33025.4	33951.3	27758.7	33933.5
M473T342	472.993	341.505								65743.3	69304.3	64504.8	72104.7	70394.5	74852.1	72759.2	63160	72067	66029.6	70686.4	75673	61718.7	72258.5	70191.2	72234.1	72226.9
M638T341_2	638.008	341.396								30763.5	44616.9	32050.3	45735.2	34828.7	41854	38715.8	28138.7	41045.1	30484.8	40049.1	38811.9	24867.7	36642.6	36791	37616.9	36674
M646T451	646.107	451.164								16629.1	10109.1	19319.2	48278.6	13897.7	12417.2	4088.06	6932.85	14585.5	10990.1	10614.3	12819.6	8764.21	12221.2	12932.4	12944.1	9445.7
M327T53	327.23	53.263								7160.73	10087	11455.7	11658.5	12357.2	551.416	6883.71	14338.1	9515.57	2752.46	7789.07	7090.2	8038.87	12644.3	13834.5	12637.8	12630.4
M948T293	947.562	292.926								8398.35	8834.78	6906.54	6044.36	8649.34	10474.4	10856.6	8238.67	7036.6	9632.5	9639.36	8852.48	10420	9331.25	9339.19	9390.78	9773.21
M391T51	391.165	51.485								6830.78	7289.19	6987.44	6269.16	6274.2	1275.71	5652.31	7891.69	5038.7	2608.69	4465.09	6444.22	6741.62	5781.44	5781.84	6032.81	5808.7
M292T303	291.973	303.4								29761.2	41665.5	33372	35022.5	41159.7	27396.7	38006.3	32255.2	32597.5	24093.9	39433.8	35864.5	29282.3	37653.9	37318.3	37658.9	36771.9
M827T140_2	826.657	140.309								14764	44988.9	51747.8	28133	46478.9	20316.9	46227.9	53324.2	17835.3	41315.3	24128	35025.1	36290	34606.2	35290.2	13125	33721.1
M648T34_2	647.613	33.993								3907.85	4797.11	4867.09	4394.47	4708.82	4568.14	3813.61	4574.07	5044.42	3569.57	8694.79	5633.64	6967.72	6236.56	4219.28	4463.88	4202.35
M855T471_1	854.76	471.188								27774.9	1022.72	3300.75	2375.73	8333.65	13451.1	4412	17396.8	1800.57	1261.01	30741.2	7756.09	25027.9	11572.2	12031.1	11224.8	11701.5
M776T58	776.485	57.873								3716.53	2099.17	4139.86	5823.26	3257.27	13132	3741.96	3488.41	2949.36	2835.72	10756.9	1859.91	1949.48	1933.94	1392.91	2012.42	2015.08
M754T42	753.557	41.621								17929	23358.5	16180.4	22339.4	17750.6	21183.1	16798.1	26098.2	23927.3	16878.9	18259.1	27154.8	18911.7	23154.6	22798.9	21767.5	21724.2
M692T341_1	691.993	341.433								23448	32822.9	27302.6	33645.4	29185.3	33593.2	35047.9	25388.1	36946.6	29648.3	29172.7	29160.2	27337.1	29627.8	29447.8	29463.5	32875.2
M413T463	413.041	463.18								3760.35	2163.27	3110.41	8620.38	3000.59	3617.79	4601.69	2598.65	4065.17	2146.48	3237.82	3940.04	1239.74	3670.97	1502.98	3733.19	3309.9
M1125T342	1124.97	341.504								36660.8	42941.5	39523.1	47424.3	42892.1	46125	48057.7	36183.3	47199.2	41993.5	45061.8	45886.5	36984.1	43422.8	43866.1	44338.1	44291.1
M669T350_1	668.89	349.832								61064.1	67504.8	44088.6	42396.5	72146.9	46965.3	73139.1	70702.4	44453.2	54300.8	46089.8	45803.8	48037.2	44926.9	46641.1	46866.9	46870.3
M1091T475_3	1090.79	475.464								14642.2	14949.7	14735.2	14635.7	2384.55	13072.8	13266.2	5598.51	23400.7	12381.9	16031.9	12412.9	696.362	14180.3	13988.8	13497.8	12413.2
M130T72	130.085	71.752								8205.77	280.88	308.132	9395.03	6348.45	1841.67	9214	442.219	336.952	4365.45	487.377	9677.28	256.177	2851.35	898.603	469.592	661.533
M837T448	837.089	447.762								9643.13	8372.22	9267.62	11943.7	9542.33	7682.87	8151.93	9903.13	5785.65	9023.71	9239.45	7221.16	8666.12	7879.15	7862.37	7862.07	6779.35
M836T200	835.529	199.704								9466.37	12973.2	10395.1	9784.48	9916.02	9347.97	10304.6	8624.07	11749.9	8089.57	11164.4	8548.88	8028.26	10705.2	10779.1	10891.7	10127.5
M925T342	925.47	341.859								2494.23	2311.75	12094.9	1084.42	2241.94	2745.38	18107.4	12406.7	2164.25	14927.6	1547.63	2291.95	2546.9	7208.52	3810.11	4393.97	4264.28
M868T32	867.719	31.9075								25230.6	7453.7	10880	5355.98	6357.42	4924.54	12144.6	11583.7	3197.4	7609.35	6147.76	3661.78	22616.2	2531.93	2352.46	2919.48	2265.61
M263T432	263.086	431.66								24432.8	30798.5	29547.6	26190	27640.7	23198.3	16005.7	32513.3	21565	28330.9	20053.2	19809.2	30646.6	19899.5	20642.2	20633.5	17005.8
M491T422	491.144	422.018								26275.1	11451.3	8177.8	1759.95	35480.5	28872.6	26412.5	31521.8	39198.7	32032.8	22585.3	25797.4	20948.7	20321.8	18853.1	19016.8	22898.7
M815T341_1	814.997	341.488								21496.4	28674	21626.4	29971.2	24394.4	27742.6	33629.1	20564	34932.7	22978.1	25690.5	26788.4	16179.6	27360.1	27881.7	27416	28807.8
M187T455	187.07	454.709								21988	18783.4	16071.6	4130.34	23704.2	28235.9	24562.4	22449.1	18431.2	20160.1	21778.8	25739	20365	21864.5	23615.8	23084.4	23606.1
M717T40	716.518	40.443								20881.3	17385.7	15591.8	17300.3	12507.5	16118	18753.2	10244.5	20771.6	14861.6	27120.5	14779.9	20499.7	17394.2	19397.4	18279.3	16090.1
M486T342	485.984	341.526								43087.4	54355.5	48345.4	61336.9	52832.7	54192.2	59447.8	42544.3	56992.4	42699.4	58414.3	45756.1	41545.3	53777.9	53437.1	53458	55763.7
M373T228	373.272	227.839								950.943	405.269	8912.26	1268.38	23334.8	600.145	413.166	2255.6	1968.39	449.69	385.129	4087.72	402.577	2767.62	2665.52	2832.75	2862.7
M245T35_2	245.225	35.3465								3431.54	3307.72	461.535	4041.05	4711.47	1925.24	2992.82	1801.12	2133.74	3356.31	7106.18	4229.46	4846.82	4514.43	4514.58	4573.97	4905.61
M294T453_5	293.949	453.12								11537.9	16139	8660.82	3885.11	12351	9353.67	11641.4	10236.1	14558.6	14063.7	19213.6	15378.3	11090.4	14533.6	14511.7	14547.8	12043.2
M361T387	361.018	386.688								30380.2	34590.6	35463.5	22569.3	36229.6	42766.7	35915.4	35713.6	38235.8	41675.1	34159.9	39056.7	37127.7	36359.5	36936.4	37181.5	37181.6
M600T187	600.312	187.385								13627.7	11615.8	18286.3	15019.7	14127.2	16712.4	19290.1	19907.8	12268.5	16753.9	12896	12259.4	19606.4	13821	13045.7	12415.2	13800.5
M1093T476_4	1092.92	476.14								14406.5	18813.5	14738.1	15746.4	2474.89	14031.8	14773.3	5350.11	24990.8	13253.8	16332.8	13317.2	780.856	15395.6	14343.7	15331.6	12128.8
M109T35	109.1	34.761								1052.62	1687.63	3098.23	1805.07	1674.87	1342.92	1395.39	5628.38	1016.77	1277.4	3196.71	1826.12	2319.89	2302.22	2378.53	2269.94	1884.3
M628T106	627.531	105.981								30986.3	29141.4	52187	14853.8	123334	29756.2	39926	39953.8	33968.5	35245.4	82555.3	28638	137541	32554.1	28250.3	29577.6	28131.9
M808T140_4	808.033	139.7								17156.9	17277.8	11460.7	12715.1	18664.5	12644.6	16771	15676.3	16638.1	21064.9	26136.3	18694.6	29925.5	18524.4	20085.1	18531.4	18768.3
M1093T476_3	1092.79	476.063								13587.7	14397.8	12777.2	15974.3	3008.08	13062.9	12357.1	4880.54	22124.1	12011.5	13823.8	10095.6	431.238	14258.7	13428	14473.3	10446.2
M231T202	231.14	202.312								12738.1	14065.3	7572.21	14690.5	9402.24	13511.1	14355.5	13656.3	11929.7	11031.5	11504.5	10851.8	10698.8	12444.1	12619.1	11792	12615.7
M235T33	235.095	33.479								6863.14	7031.84	9431.02	5124.82	4066.09	6421.19	7285.11	5973.11	6440.66	5584.53	11505.2	6233.2	7694.62	6585.6	5157.08	6586.96	6585.8
M915T31	914.717	31.3495								16250.5	6146.79	6542.68	7237.8	5260.47	4505.24	7623.69	6518.01	3659.41	7665.54	5384.84	4168.69	9151.93	4656.27	4354.8	4374.94	4638.74
M255T100	255.157	100.094								7222.9	14277.7	7050.71	11131.2	8017	3797.04	13777.6	70729.1	10260.9	4407.46	5187.75	12830.7	14625.6	7225.53	7342.83	7658.29	7228.39
M228T257	228.081	257.335								4463.69	4335.19	805.598	4225.05	1633.73	2573.82	2842.93	2758.24	3905.05	2485.32	4726.48	2004.87	3521.87	3415.1	4011	3434.7	3681.55
M992T31	991.752	31.012								13374	4396.23	10850	5236.14	12853	4752.44	10189.1	11112.6	2222.43	4691.3	2880.63	5438.69	8010.39	4917.92	3033.2	4533.44	4186.32
M298T397	298.006	396.814								6743.07	1951.15	3815.13	17397.7	1102.42	1379.97	1051.73	1733.78	2212.56	1092.42	1423.07	1349.54	1096.82	1407.4	1427.83	1231.13	1380.17
M598T33_2	598.484	32.8675								6665.71	3795.89	4998.43	2441.72	4427	2058.83	3536.42	6041.57	2126.18	1902.99	4613.87	1818.98	5287.94	3144.21	3374.7	3359.68	2561.78
M1113T341_4	1113.49	341.467								23758.1	26820.2	21295.2	28736	24317.9	32843.5	26707.2	22056.7	27259.4	24715.6	26340.5	24842.7	19087.1	26578	26014.4	27022.8	26248.2
M247T29	247.085	28.7635								5847.28	4523.58	4998.97	7315.33	1440.01	8699.97	3242.58	2845.14	4016.94	376.605	4941.91	4169.43	3245.7	4295.95	3468.98	3670.63	3433.28
M199T413	199.068	413.048								8422.65	22126.1	8816.75	1942.75	29244.7	24390.5	25547.8	32516.9	16473.8	36142	29712.2	22015.5	27630.6	25898.9	30125.6	33168	33298.8
M429T34	429.188	34.142								2597.46	8176.15	7170.97	11640.2	8384.25	4107.75	2573.28	6797.45	8337.35	7072.94	5828.34	7857.43	6899.64	5801.03	6570.33	6856.79	6783.14
M569T341_1	568.988	341.409								33795.2	44668.6	36115.6	44993.2	45364.8	40927.1	44780.7	31946.2	43301.5	34381.8	42193.7	40345.2	34133.8	40868.1	41274.4	41591.3	41603
M886T490_1	885.893	490.341								5121.96	7278.31	5729.99	10772	8971.95	5146.04	6844.03	7189.06	6977.08	7138.17	6569.78	7391.62	6219.15	6746.56	7174.61	7359.08	7346.98
M723T35	722.508	34.6435								9583.11	6249.4	7066.89	5819.2	8573.93	733.642	7825.55	3378.87	7979.96	1040.32	9760.45	6369.94	6911.94	8342.78	7985.45	8231.99	8449.3
M337T460	337.059	459.785								29247.9	17105	29768.4	34249.7	17543.4	19119.1	11774	14406.5	16402.4	19139.9	17458.2	18481.2	17731.5	17176.4	17186.2	17851.4	17826.3
M1125T347_2	1125.05	346.561								1612.44	26733.2	1620.83	1554.18	29345.1	31038.7	2163.38	22071.8	29666.2	1490.85	1832.22	30969.5	865.905	24436.4	24334.7	5334.02	24571.2
M324T35	324.287	35.461								2952.29	3277.45	2526.13	2872.95	4703.74	3144.07	4147.23	4423.02	2905.33	2590.62	8562.43	2581.85	3884.84	4974.52	4289.54	4404.64	4295.74
M132T362	132.075	362.334								44848.1	26435.3	32587.3	31744.1	23308.1	20632.3	26440.4	37812	26606.9	22685	27413.1	28796.3	31403.8	30675.3	29871.1	30906.9	28404.6
M682T32_1	682.359	32.243								7168.96	15629.2	8995.27	10622.3	9294.59	3358.36	10603.6	7481.5	8511.93	5542.72	11263.6	8635.8	4760.49	6822.12	6837.09	7626.25	7177.75
M634T329_2	634.323	328.935								3764.01	4807.12	4956	2126.41	1632.2	2072.81	3214.57	2959.4	2598.84	6833.87	4990.56	3753.82	2034.87	4388.34	4400.13	4329.37	4349.38
M733T119	732.549	119.459								28911	42374	18391.6	19989.9	35482.2	47452.6	77174.1	14953.5	35365.8	32722.8	28684.3	38792.9	46661.2	43976.9	42306.4	42909.6	43427
M267T302	267.109	301.743								13747.3	13180.9	11216.5	13330.1	13845	13782.1	12254.2	15472.3	12912.3	16292.1	16238.1	11093.2	16836.3	13706.1	14379.1	14108.1	14499.4
M586T341	585.978	341.479								5613.43	6124.93	4370.02	7830.57	4300.27	5028.49	4118.65	3815.24	5870.45	3780.82	4298.49	6805.67	3185.23	4783.58	4440.02	4844.05	4665.61
M703T34	702.545	34.1335								5089.49	8062.15	5410	4837.47	10495.3	3920.31	3966.41	4364.41	6914.45	3204.7	5778.06	8497.32	3233.15	6538.77	6967.49	6354.57	6353.38
M791T480_1	790.877	479.825								9186.65	6282.61	4766.11	5920.84	3332.01	4061.6	4967.79	7782.21	10665.9	7224.63	9031.95	7242.76	5209.9	6422.37	6429.79	6617.35	6620.11
M827T152	826.587	151.904								27691	20857.4	31035.4	27149.9	28003.1	32611.5	39735.2	31489.8	21041.5	36221.4	29198.3	12408.3	30252.6	26961.5	27249.7	24839.1	25096.6
M1093T476_5	1093.04	476.14								15166.1	17626.6	15672.3	16923.5	3271.63	16148.9	16438.6	7723.03	25729.9	17529.5	18700.3	13387.4	1691.65	15954.6	15909.5	16108.9	13491.6
M349T448	349.054	448.091								14335.9	11401.8	16011.9	20336.7	13189	14972.5	12247.7	14687.7	13653.5	9959.78	12683.4	10346.1	10553.1	12738.9	11973.3	12808.7	12511.5
M226T384	226.082	383.625								6878.41	10005.4	6222.79	9731.69	17281	8157.77	16398.8	11148.4	8510.28	14254	10208.4	9151.5	10836.1	7405.98	8164.74	7765.73	7630.41
M701T85	700.567	84.756								46967.6	25793.8	27153.6	27750	23906.4	18194.5	24715.8	41388.4	26509.4	27753.9	27280.4	25107.8	52382.6	24277.8	24252.3	22971.5	21300
M295T35	295.116	35.206								1994.89	3684.28	2284.29	3662.59	3052.77	3040.58	4083.55	2787.24	2851.89	2729.1	2834.79	6578.62	1813.2	9095.85	8811.63	9416.26	9261.79
M339T34_2	339.157	34.007								10059.6	9601.82	7196.76	9839.18	7454.1	6689.45	7808.42	7307.17	7831.24	9048.27	9045.51	8571.62	9965.84	8331.34	8392.42	9142.72	8781.11
M843T342_3	843.472	341.796								1332.48	1863.7	4435.48	5306.38	17077.1	22234.2	3774.68	1752.45	4647.77	2312.15	1899.43	18269.9	2395.52	3357.5	4413.24	8216.18	3849.75
M506T29	506.134	28.654								411.937	663.195	375.822	10411	584.22	37.9542	751.984	562.829	590.711	108.713	967.842	896.79	610.701	644.542	661.104	650.046	677.305
M949T341_3	949.481	341.479								36092	44688	35891.7	46665.6	43138.6	49919.1	48146.3	34438.9	46399.2	37365.1	41892.7	43000	34040.5	41415.7	43156.2	45080.5	42438.3
M1093T476_6	1093.17	475.818								17671	20085.1	15260.2	19396.6	4236.25	18489.1	16764.3	9773.65	26199.4	9051.36	20222.3	17189.9	1351.08	17890.1	16996.9	18040.7	12316
M447T355	446.844	354.975								43790	45258.9	50919.9	41875.8	47545.5	51421.8	51568.7	49946.9	44226.1	49721.6	44957.2	49449.9	47340.5	47387.5	48283.7	47392.3	47757.2
M854T471	854.426	471.188								22782.6	914.096	2950.02	1517.06	6383.38	10971.3	3898.1	14706.5	970.887	1162.08	25852.7	5978.4	18830.4	9364.95	9251.94	8964.76	9854.66
M951T33	950.803	33.377								8253.79	1570.64	19798.5	2477.94	7263.32	2101.86	3177.45	8812.74	893.644	1473.26	1865.77	1259.61	9850.26	1046.09	946.987	995.268	945.894
M562T190	562.323	189.905								5458.12	6839.77	4336.64	6022.95	3091.73	5433.36	5743.84	6834.9	6118.38	4762.76	6077.97	6982.44	4202.55	6612.71	6256.18	6269.27	7882.9
M246T115	246.15	115.204								20818	11271.5	29152.6	24605.7	18350.2	12126.8	15607.2	31169.8	10834.8	8533.13	18528.5	20563.5	14248	27980.8	24515.2	27980.7	27181
M349T467	349.134	467.165								10151.3	8407.93	11005.4	13149	4028.28	5727.47	5775.04	4458.89	7771.69	5201.83	5601.16	4660.75	3838.75	6762.6	6185.15	7089.44	3777.85
M260T391	260.072	391.085								7719.01	3454.9	4638.65	3767.23	3976.07	4696.38	2434.72	9468.96	6555.11	2339.14	3480.25	3632.83	3416.35	6640.97	4161.86	6029.37	9130.43
M364T27	364.309	26.735								906.432	1378.77	1173.23	916.438	1211.99	879.398	1519.72	1536.99	1213.86	921.978	946.957	621.674	2927.84	1234.84	1277.94	1523.56	1234.47
M364T28	364.34	27.706								1533.84	1533.45	1615.33	1368.27	685.683	2104.74	1648.32	1741.46	1964.31	1043.15	2097.33	594.587	3652.38	1326.5	1275.26	1911.47	1271.3
M259T424	259.138	424.022								34663.8	2207.29	2260.91	4463.86	35665.2	683.719	478.703	3372.12	40285.6	39928.1	3645.03	837.538	3454.08	39215.8	38644.4	39587	41060.1
M266T35	266.285	35.287								1375.97	3814.17	1213.47	2284.3	1287.51	1614.62	2072.95	1560.92	1914.59	1628.35	2021.59	1832.63	2439.86	1700.1	2012.66	1701.54	1699.29
M225T448	225.053	448.091								13966.9	9135.31	14563.2	17496	16679.6	12732.9	10012.9	11889.2	14255.7	13701	12893.3	13574.4	11685.9	13461.9	13401.1	13583.5	13391.6
M371T420	371.073	419.661								12779.8	11124.9	12633.5	19403.3	9591.06	12354.3	11496.7	11363.9	11171.5	10088.9	11862.3	11191.9	9285.82	11535.6	11354.4	11542.2	10521.9
M507T448_2	507.121	447.822								3578.63	6848.56	4503.38	6331.89	6536.44	3982.62	3736.89	4651.15	3343.02	3754.5	5924.97	4779.18	4460.04	3702.64	4597.9	4599.55	4598.18
M275T32	275.202	32.2685								3381.07	4203.62	2432.85	3880.36	1448.34	1138.22	2818.82	3383.38	2534.98	3325.08	2894.68	653.419	1885.73	4905.37	5352.04	4212.68	4477.88
M669T335	668.891	334.875								21146.3	21428.7	22204.3	22371.9	23325.8	25472.2	22631.6	25033	23159.7	26055.5	23631.4	24243.6	24732.4	23160.2	23161.5	24177.2	23162.9
M1090T341_1	1089.53	340.902								18904.4	25205.8	20696.9	31634.5	20040	27483.5	29434.9	17995.3	26130.3	20051.8	24650.7	22395.1	15884.8	21880	21879.7	22565.8	21887.8
M337T302	336.946	302.333								5603.03	4521.08	215.375	242.855	227.797	280.176	518.028	107.918	293.659	134.937	4126.18	196.19	185.147	1790.93	301.425	502.071	454.984
M251T207	251.101	206.874								13882.7	17801.3	11063.1	9738.37	8991.54	14410.7	14178.5	10285.2	11324.9	10997.8	13810.2	10543.8	7827.35	12869	12884.6	13108.6	13246.9
M762T341_1	761.513	341.467								26020.7	36259	27126.2	42884.2	31000.2	36467.9	37891.9	24643.5	35403.7	27447.5	33250	33295.5	23814.5	32270.2	31380	32254.1	32255.6
M615T329_1	614.844	329.124								2628.67	3220.24	3415.52	1425.63	972.938	1103.45	1732.16	1540.11	1782.07	4211.66	3203.42	2169.1	1265.29	2936.39	2931.24	2936.91	3549.34
M1028T192	1027.68	192.31								9872.74	12295.5	8442.14	14868.4	11306.5	16146	10496.6	7242.14	13852.3	9023.9	11022.1	10143.8	8435.52	10365.3	10384.5	10366.8	13165.6
M927T346_2	926.955	346.038								1406.92	15365.8	18011	15579	819.854	14707.1	15638.8	1428.16	1453.33	1879.36	1014.93	19326.9	11472.5	1491.41	1542.9	5434.78	2136.09
M497T334	496.898	333.943								2556.46	1325.42	1810.12	2255.38	1780.02	1777.48	1822.72	5398.11	2077.68	2274.67	2278.11	5438.24	2143.89	2495.87	2493.31	2495.99	2345.11
M692T302	691.815	302.148								10999.6	7115.34	6522.54	6702.09	2564.86	2522.61	5754.8	5020.7	6522.06	2105.35	5984.46	6422.83	2954.82	6675.09	6372.01	6736.33	5615.76
M753T61	752.554	61.3375								39886.6	44391.3	32393.1	44254.2	35158.5	44639.9	20819.8	41940.2	147931	37422.2	40062.9	27831.8	30424.4	89178.8	52505.8	51056.5	51911.2
M247T420	247.091	419.659								11032.2	11272.4	13268.2	18175	7920.48	10791	10272.3	12808.2	12626.8	7819.77	13405.3	9867.2	10280.7	10266.8	10416.4	10555.9	9654.73
M528T296	527.871	296.484								19237.5	19248.2	6682.54	13040.1	8716.81	12198.4	14271.2	6794.67	8306.07	5503.33	19065.2	12113.8	8244.67	14604.5	14355.6	14531.6	14604.1
M144T397	144.075	397.13								6160.26	5639.06	6128.83	6423.37	5444.31	4914.42	5852.41	5315.51	5222.57	5930.83	5182.63	4552.32	4684.46	1440.25	4215.73	4218.29	4202.65
M511T405	511.209	404.933								10389.2	911.419	2332.98	1307.56	2451.27	2419.47	2432.52	7093.39	2405.3	1461.83	8804.18	2515.05	15564.6	4861.65	4594.65	4766.62	4857.59
M860T145	859.684	144.59								8746.4	9871.32	4976.7	5774.7	9508.6	4200.72	11890.2	8222.62	8869.72	2701.79	11624.3	12294.9	10917.4	10531	11286.1	10192.1	9320.13
M590T189	590.376	188.657								683.482	2884.01	3427.96	3055.4	3257.79	2905.14	3724.41	708.671	3336.53	2624.21	1329.84	2384.17	1448.26	4132.35	4132.41	4163.8	4163.85
M228T206	228.096	206.284								23123.5	23330	21377.5	23752.4	22847.7	25387.2	30124.8	18695.5	23837	20064.1	23775.6	22363.9	21120.9	24777.8	24774.7	24992.5	25654.6
M684T305	683.878	305.178								32323	41923.7	31428.4	30920.7	32770.8	23037.6	35428.4	28361	29960	20322.2	36197.2	36713.2	25297.6	37290.1	36932.2	37289.7	36956.9
M1091T475_4	1090.92	475.279								12182	12379.4	12413.5	11458.4	2211.04	11817.6	12047.5	4163.55	19470.4	10608.8	13321.2	9742.94	601.926	12480.4	11533.6	12317.5	9972.19
M990T341_2	990.482	341.418								32002.5	41963.5	31876.9	43383.3	38280.1	41723.8	43693.6	31865.3	42366.6	36400	41482.3	37999.3	32292.7	39102.3	39632.4	39833	39835.5
M613T427	613.312	427.059								8601.6	2201.12	6519.52	8718.79	4769.6	3384.82	3859.56	11097.4	12741.5	1291.09	11190.2	3520.24	5004.71	6286.32	6383.43	6234.4	6233.76
M724T157	723.536	157.44								13386.5	26239.3	14908.9	25194.4	19374.6	32694.8	26425.6	12432.5	30965.1	18705.6	29103.9	24579.8	11548	29026	29346	30556.4	30448.8
M829T102	828.548	101.588								20703	23140.3	24928.4	28950	29610.8	48343.2	96124.4	29038.6	73160.5	30087.6	20443.8	27290	28217.8	48306.8	50296.5	58263	57759
M832T138_3	831.957	138.498								14990.1	14913.8	13277.1	11204.7	12327	13565.7	14149.2	14642	11848.8	11824.8	16279.4	13404.6	14639.7	15995.7	15766.5	15886.7	16064
M446T34_1	446.216	34.1595								6233.45	3157.53	2733.25	4678.48	5847.99	2816.56	4543.85	3734.45	4223.32	3521.28	6165.95	4739.01	3733.29	4196.99	3163.56	3903.82	4395.69
M751T349_1	750.893	349.183								39758.4	39695.5	39133.8	39765.2	45426.4	68574.4	44556.4	64647.2	67848.8	44365.1	65629.4	43264.2	46171.1	41626.1	43688.6	41629.9	42094.3
M634T33_1	633.521	32.845								9786.33	8943.21	6969.7	7515.33	8251.65	3429.02	9748.26	4462.84	8883.59	4582.24	10822.9	8137.44	8373.75	8125.66	7275.82	7348.13	7273.53
M430T34_1	430.187	34.067								5623.12	3282.4	5536.86	5471.34	5175.89	3552.28	4011.59	374.566	5189.95	6410.33	6968.82	6738.35	6098.93	5799.54	5392.6	6004.31	6013.08
M873T138_1	872.552	137.888								19887.5	19981.9	21267.4	19430.7	20961.1	24952.3	18149	20653.5	17334.9	23021.8	19428.1	21824.3	23441.7	21358.6	22180.1	21477.2	22012.5
M518T34_4	518.489	34.006								5784.02	3915.2	2460.56	4059.04	3745.43	4059.56	2903.83	2157.75	2499.05	6458.51	5941.67	7734.58	3135.36	4506.07	4272.13	4450.11	3804.4
M161T32	161.025	31.632								9475.74	7424.51	5148.6	6903.52	7155.96	5422.8	9340.82	11735.1	7282.56	5756.05	8511.58	9884	6639.7	9180.35	9931.56	9853.56	9763.51
M661T32_2	661.357	31.602								6175.84	3286.73	3424.71	3991.03	4350.21	3377.7	3257.57	3269.27	3319.22	3164.71	2974.88	5622.96	3992.42	5379.91	4618.4	5555.93	5552.38
M131T35	131.069	34.818								9719.56	10504.6	7821.01	8302.74	5544.86	9144.75	9576.85	8537.4	8339.48	8400.18	8526.96	8796	9141.39	8062.97	8062.59	8178.28	8126.17
M628T184	628.341	184.431								11559.5	12179.2	13498.4	12129	10005.5	17544	13694.6	12519.1	13744.2	19633.7	9758.11	11769.9	15872.9	12351.6	11737.4	11740.1	11739.6
M1061T341_1	1060.5	341.467								23698.3	32022.7	25906.2	37521.3	25983.1	33300.4	33403.1	22216.2	31684.8	21561.3	29239.2	30340.4	20299.7	30552.5	31280.1	30853.8	31605.9
M901T488_1	900.921	488.183								4969.26	6096.54	3887.49	5958.13	3692.78	4023.42	5917.94	5341.29	7044.08	4621.32	6328.93	5210.2	2521.9	5439.9	6018.39	6199.61	6151.27
M128T34	128.06	34.214								1055.77	1482.27	1101.55	2174.62	772.212	1320.36	969.01	838.469	1592.23	1476.99	1235.48	1152.53	1055.5	1508.05	1509.87	1534.67	1802.45
M875T385	875.22	385.354								8214.21	8620.72	5274.35	9982.09	19417	11443	19238.9	8534.23	8642.59	14609.3	10456	11245.4	9346.74	8930.9	10045.9	9554.77	10174.7
M499T187	499.053	186.837								38994.5	26066.3	20077.1	28508.9	14182.6	38668.8	28178.5	35434.1	22601	19892.2	16309.9	24246.9	30277.8	25956.1	28000.6	25534.6	27985.4
M780T173	779.6	172.871								19414.2	18868.8	17984.1	17538.1	17947.3	26008.6	18776.9	15031.9	15801.9	22404.9	19703.1	12527.8	17638.6	18339.8	18345.9	18057.2	16876.5
M560T24	560.406	24.474								1018.21	793.757	1999.08	3765.6	951.836	1246.2	1315.84	622.12	571.467	551.879	2071.28	1007.66	2557.2	810.2	1749.92	1736.55	1740.85
M330T448	330.005	448.195								14698.8	16363.4	15259.4	21404.2	15096.8	14050	14270.1	14820.6	15098.5	14443.5	16607.4	15323	13926.7	14910.1	14402.3	14493.7	14403
M429T29	429.249	28.977								15698.3	1182.99	13194.2	1058.9	10664	1031.92	598.361	861.752	12872.2	8193.54	1576.91	805.527	2866.62	7637.56	7654.83	7649.81	2768.7
M1013T448	1013.1	448.195								10829.1	8054.38	12115.6	15154.2	12162.5	10929.8	8650.92	11314.5	7902.71	12235.8	12345.9	8814.79	11529.3	9271.51	9117.67	9405.5	8872.05
M283T72	283.173	71.6255								13627	9336.51	13196.8	8876.01	7364.22	24282	15746	13540.5	12141	7609.97	14376.3	6726.9	9875	11979.8	11957.7	11997.3	13680.7
M1047T32	1046.84	31.754								4741.95	5566.97	5456.28	3492.15	5397.8	2170	2953	4143.95	7357.93	4788.15	4400.62	5387.9	7748.34	5984.84	5221.65	5265.32	5160.18
M171T35_2	171.115	35.31								1493.6	1206.82	1789.75	1435.28	1344.19	1006.92	1229.55	2700.95	2155.85	1571.08	1157.74	1687.21	1448.06	6681.72	6704.63	2551.16	6602.99
M1154T341_2	1154.49	341.415								21362.4	27779.6	20234.3	27088.8	24984.8	27030.1	27604.7	20801.2	26664.3	21162.6	28330.1	23908.7	18092.3	25841.7	24824.2	25561.7	26199.1
M112T163	112.049	163.335								23694.8	21785.6	18149.6	23628.2	17741	20585.5	26217.6	16459.4	13459.7	17214.4	20367.7	19475.3	17758.1	20423.1	21266.4	20576.2	20423.4
M361T32	361.237	32.262								11633.9	6444.52	5009.53	3143.15	7886.25	2452.24	4915.39	4703.29	5896.72	5730.49	3794.09	6408.6	15043.8	5491.51	5734.34	5482.94	6028.5
M489T405	489.227	404.961								10820.5	615.289	2674.13	1608.72	2444.82	2204.92	1881.72	8027.26	2207.85	806.988	9054.05	2382.44	16628.3	4574.54	4597.73	4679.32	4732.34
M1116T189_2	1115.69	188.953								3159.79	6855.73	7819.84	8356.41	7491.8	6815.19	5016.94	4656.69	5230.33	4752.55	5919.03	4560.58	3582.86	7101.58	6724.22	7468.8	7583.82
M248T202	248.166	202.304								10406.5	13173	6697.84	14967.5	8525	14662.7	14137.7	13591.9	12192.6	11501.1	11777.1	10082.8	9426.19	12585.2	12554.5	12496.1	12495.7
M816T61	815.628	60.824								29415.8	41074.1	29400.5	52863.6	31013.5	24531.3	45865.8	38488.5	30196.5	29405.5	41182.2	35819.5	21237.7	41221.5	36779.8	41230.2	41253.9
M660T32_2	660.387	32.185								4212.24	4049.58	2087.55	2979.31	2720.02	2779.66	2581.59	3730.92	3660.64	2523.46	2936.61	2559.91	3843.51	3193.07	3327.95	3357.86	3357.27
M205T409	205.051	409.452								1818.19	1210.66	859.374	3214.58	1485.41	1884.63	2338.61	1706.01	1159.53	1602.82	2384.2	2066.82	2692.98	2002.95	1991.14	1861.66	2001.54
M375T296	375.096	296.077								37351.6	40532	38161.9	40938.7	33110	38686.1	35109.1	33514.4	37817.2	27605.6	35035.1	32139	27396.1	34771.6	34315.9	34067.2	34068
M220T162	220.059	161.626								21314	19205	23005.8	20980.7	22757.1	19421.7	20493.6	24665.8	20355.7	16319.4	19281.9	21033.8	22431.8	19722.7	19510.7	19795.1	19919.5
M774T341_1	773.996	341.495								25798	32912.4	26026.2	31455.9	30213.2	33247.9	31751.4	19636.1	28520.1	23088.2	28840.2	27462.4	18797.7	26558.2	27439.6	27430.3	27431.7
M251T211	251.081	210.529								3104.9	171.985	2795.42	2624.95	94.4726	280.014	3564.29	2495.07	3008	205.991	3673.48	81.059	2272.95	459.326	1259.11	440.47	530.732
M969T420	969.154	419.692								9632.57	9143.72	9879.18	7332.84	6654.29	10492.4	7445.71	8892.92	9205.87	6576.41	8079.67	9484.48	7001.13	9342.28	9174.7	8363.61	9591.92
M157T35	157.099	35.2515								5634.72	7342.53	5057.86	5746.21	3836.12	9880.56	5427.66	8011.74	5833.57	7131.62	6012.17	5501.46	6619.32	5772.89	6111.74	5955.81	6102.61
M666T34_2	665.585	33.529								2034.69	2232.75	1602.68	3194.47	4598.03	2021.54	3438.88	2599.04	3015.03	1433.17	3012.21	2772.04	1896.5	3447.8	3289.8	3302.43	3672.22
M707T42	706.534	41.709								28939.9	21385.7	25105.5	23901.4	13335	11907.5	13210.9	24949.1	24551.8	10187.5	79035.6	17164	13366.3	35425.3	28989.5	28514.6	31477.4
M279T82	279.23	81.6185								24641.4	15225.2	23694.1	27336.3	39734.6	22175.9	23063.9	49779.8	23220.7	10466.6	16029.2	9461.87	42276.7	24040.7	27045.2	23999	24048.7
M124T132	124.085	131.718								53633.5	64178	59071.3	50450.9	55710.5	34158.9	57397.8	52242.6	60085.4	36693.6	56230.1	67505.5	52266.7	47052.6	47988.9	49931.2	41230.9
M984T198	983.603	197.787								2437	1951.06	3299.3	2301.53	3241.05	2749.8	4078.5	1500.2	2598.01	1906.46	3809.53	2950.65	4257.3	3132.03	3187.07	3039.7	2877.05
M394T169	394.166	168.818								306.392	197.503	4252.29	539.48	10938.3	595.152	739.799	3113.92	7353.96	567.248	5188.79	823.688	300.476	2170.64	568.194	731.894	733.741
M453T35_1	453.17	34.795								5811.22	4394.72	2055.49	2964.61	6062.06	6309.87	5883.79	8064.38	5317.68	3065.11	5194.98	4336.31	4284.83	10733.5	10733.2	11316.9	11889.3
M453T21	453.226	20.7445								21242.3	23433.7	10678.3	25828.9	18988.3	24462.6	4849.51	22737.6	23331.3	26874	13224.3	24059.5	7910.14	16667.2	6756.91	14820.4	18384.3
M678T157	678.465	157.412								3230.84	4244.56	2404.44	2996.69	2316.07	2881.6	3029.27	3127.54	2849.86	2211.06	3889.44	3594.79	2743.74	5250.1	5233.19	5252.21	5845.12
M668T348_1	668.054	347.702								20353.4	19816.2	15374.4	21472	19807.2	22006.1	22977.5	19227.4	18568.1	15605.9	23601.3	18685.6	17771.9	21150.1	22016.6	21884.2	22013.6
M475T424	475.284	424.055								2983.55	323.858	1568.61	406.487	2648	1805.71	829.451	5578.48	1600.09	477.104	6284.74	1515.41	8088.55	3449.18	2659.11	3751.14	3854.84
M217T461	217.081	460.67								60519.7	60221.7	51919.5	23877.9	56776.9	60520.1	68901.7	53879	62858.8	62788.7	37565	66958.1	56275.3	62568.7	64011.5	50241.6	63925.1
M861T485	861.381	485.294								2286.87	1783.73	2423.63	5536.62	4679.08	2145.78	2836.28	3214.88	1991.7	2995.93	2079.45	2540.61	2683.71	2579.03	2436.77	2576.49	2576.01
M251T20	250.986	20.4675								34327.2	78875.6	91298.4	90748.7	99806	64970.5	71474.2	105758	76266.3	85872.9	49038.6	79672.9	87220.6	74744.4	72346.9	75060.8	47553.6
M487T308	486.834	307.698								27872.6	26866.1	24298.3	19299.8	20952.4	21154.4	27640.1	19774.8	22200.7	25524.1	25595.4	31265.6	23803.3	28312.7	28312.4	28746.2	28739.9
M270T48	270.278	48.4395								30561.8	36638.9	49419.6	49504.2	52109.2	18304.3	28433.6	38103.2	37318.8	21549.4	26598.8	31008.7	36001.4	33438.4	33675.3	31865.3	32840.5
M341T357	340.88	357.405								63202.3	65678	63444.4	58866.3	65288.5	67767.7	67431.5	64294.5	63571.8	71424.4	65564.3	70417.4	69356.5	64861.9	65421	64861.4	64861.5
M657T349_1	656.91	348.747								32089.9	22158.6	21894.6	22307.7	25142.4	38883.4	24028.8	22112.3	21458.7	24730.3	23495.3	26240.2	25212.7	24713.7	23290.5	29172.7	23247.6
M585T341_1	584.98	341.453								21138.7	28523	24192.3	30915.1	21834.3	26122.3	23653.1	23740.6	26446.4	15806.4	23156.4	22026.7	17826.8	24870.7	24506.7	24858.8	21684.1
M334T49	334.236	49.0835								14125.1	5619.72	8811.79	11124.2	11370.8	1499.89	9173.34	14188	9129.22	2262.69	9837.94	9627.8	11557.7	11315	11935.1	12471.7	12158.2
M397T214	397.164	213.952								51331	36065.5	48458.7	34654	53363.8	39970.3	39900	56134	44517.7	56643.4	45201.8	51157.9	46485.2	44847.3	47357.2	43819.4	45388.9
M177T273	177.133	272.62								13437.9	2987.33	4765.28	2059.68	7686.91	5217.81	1409.63	3103.82	2018.08	1092.02	3598.13	2030.02	1591.32	3799.64	4910.12	4768.95	4904.82
M844T32	843.722	32.2295								12857.9	3450.73	7021.64	3323.1	2798.48	2857.81	7276.52	9189.39	902.554	3598.8	2793.66	1940.68	19515.8	1082.59	1065.52	1066.45	978.865
M1106T189	1105.71	188.688								4044.4	6051.6	6458.05	4025.74	4452.84	4350.12	4132.51	5568.45	6269	7325.32	7538.82	4954.9	2771.3	6901.88	6144	6903.79	6898.33
M498T342	498.466	342.147								19452	25715.6	39439.7	44284	41344.5	43376.9	43658.1	36671.5	24282.3	43366.8	43042.1	41889	38516.7	43985.8	45932.1	43989.1	44111.4
M1166T341_1	1165.97	341.479								28858.6	38572.8	30814.8	38698.1	33633.3	40071.1	43785.1	30975.2	36194.2	31311.6	36700.3	34018.5	29272.5	35568.4	35570.7	36942.4	35567.3
M125T353	125.019	353.47								19720.5	21828.1	23340.4	18245.4	18380.5	16858	17751	14005.4	22095.2	19123.5	24306	20480.5	17004.1	21987.2	22295	21981.2	22966.9
M808T39_2	808.033	39.2425								8283.65	11334	14120.7	13518.2	12333.7	25331.9	14248	12469.2	15727.2	17769.9	10733.5	15866.2	18310.3	13590.2	12671	13445.1	13592.1
M542T33	542.307	33.379								6907.92	3496.68	4183.09	4524.86	2924.1	5055.75	2127.64	2902.43	4550.36	4180.78	2947.06	3884.97	3901.8	5756.63	6145.74	5711.24	4769.98
M542T34_3	542.347	33.855								2271.69	1652.28	2054.29	6798.61	3024.49	1349.08	815.361	3287.66	2295.38	2286.44	1507.4	2683.47	2508.08	6461.86	2534.67	6453.83	6583.32
M1102T341_1	1101.51	341.423								21117.9	27294.2	22469.4	32420.4	21388.7	28657.6	32013.6	19244.4	29644.8	21000.2	29447.2	27245.1	19997.6	25652.4	25448.7	26712.9	25457.9
M846T38	845.524	37.984								3383.13	5505.12	3722.43	3872.81	5811.56	16892.4	3309.59	4469.13	8757.13	13035.5	3284.87	3193.52	1997.25	3849.45	4445.3	4449.05	4445.46
M317T407	317	407.493								893.54	825.573	4682.45	959.7	2100.43	888.895	1316.64	487.797	1500.71	1054.86	936.964	1549.06	1180.97	898.244	820.838	867.369	889.86
M733T341_1	732.994	341.423								27228.9	36705.6	26393.7	37321	32376.4	39586.6	33952.4	22553	37021.3	27003	34173.5	29901.3	26416	32657.6	33109.4	32801.7	32541.3
M244T122	244.262	121.665								1215.79	1621.38	2184.39	1351.71	19421.8	408.731	395.255	1753.09	5315.89	925.565	1615.48	1385.71	2290.81	4693.3	6162.68	4654.85	4643.86
M845T154_1	844.58	154.276								3443.49	4129.69	4448.07	3781.23	2579.6	3462.85	4599.65	2108.92	5266.15	4477.41	5927.58	4354.17	2576.82	5108.3	4747.92	4766.45	5820.36
M1049T341_1	1048.52	340.902								19818.1	32960.2	23526.5	35911	23935.2	33735.8	32721.8	23262.6	32170.3	23539.7	31185.8	29085.3	18799.1	28688.3	27894.6	28725.1	28370.5
M846T448_1	845.573	447.649								9624.84	10378.8	9420.59	8614.33	8334.4	9482.85	8389.26	10112.5	9049.92	7941.14	8607.89	6947.77	9605.16	10013.1	9595.97	9844.23	8765.14
M1091T475_5	1091.04	475.334								10315.6	9812.06	9673.59	10033.6	3161.71	10013.1	10287.6	3997.06	15987.9	8408.84	10587.8	8284.67	788.474	10137.6	8518.46	9049.31	8312.99
M144T372_1	144.075	371.677								28187.1	14149.2	31884.4	11460.2	11233	13560.3	13658.4	10591.1	16365.9	11662.1	14272.8	16676	12176.6	15513.7	22975.3	15382.3	15385.8
M360T439	360.031	439.134								2070.37	1357.02	2728.33	1495.21	1241.45	1768.8	2675.69	1438.36	1520.4	3239.05	1565.57	1228.03	1914.34	2108.95	2119.53	2113.45	2562.16
M566T186	566.414	186.202								6632.11	8358.39	6672.08	3387.45	6151.61	9341.42	9315.88	9230.81	9092.8	5899.9	7672.63	6846.01	8762.32	7684.72	7275.79	7724.36	7123.32
M938T341_2	938.002	341.467								18002.9	25423.3	16073	23856.5	20220.7	22424.5	26169.4	15524.7	26613.2	19194.9	22831.8	22520.9	13441.6	19216	19218.3	20576.8	19215.9
M892T32	891.719	31.535								16342.1	3338.44	5611.22	7951.87	3585.03	7219.81	9089.65	6979.12	2319.68	7169.99	6215.36	2866.37	17608.6	4291.98	4010.72	4050.3	3327.76
M148T328	148.041	328.09								18879.2	13713.2	12658.1	14204.4	24710.5	17538.5	16085.4	28843.7	17139.2	13705.8	21198	13553.1	22137.1	17182.9	16105.7	15704.6	15693.1
M694T34	694.36	34.1285								5174.44	2067.21	6830.73	1785.57	7304.68	2975.68	6069.31	8908.65	6779.62	2039.74	6330.32	5640.37	3178.34	5746.92	5298.77	6102.13	6348.38
M1072T341_2	1072.48	341.426								26182.9	32442.1	26272.7	37690.1	29622	34942.2	35637	25105.1	33241.7	27737.8	33460.8	29109.3	22492	30767.5	30487.8	31074.3	31077.4
M897T198_2	897.484	197.801								2631.11	5634.5	4439.1	2943.61	3094.05	6005.84	5127.99	1576.47	5836.69	3714.34	4549.29	1699.25	1710.18	5769.52	5284.98	5320.32	5290.07
M131T49	131.067	49.054								12214	9618.7	15131.3	7625.58	7393.85	709.19	9456.53	19723.5	8575.13	3547.28	6305.24	9607.31	8467.41	9142.67	8459.12	8412.58	8837.34
M176T393	176.101	393.343								63717.1	58247.8	69727.9	76563.6	90872.1	44014.1	72884.4	65190.1	79636	36930.4	68665.8	53195.9	63403.4	56311.9	59831.3	56167.7	59792.2
M574T34	574.316	33.614								6230.09	6117.85	3544.3	4364.01	3842.14	1806.81	3202.52	3375.05	5554.53	2999.21	7258.85	3830.82	7131.69	4903.86	5162.18	5363.15	4404.1
M704T379_1	703.885	378.524								2948.65	3319.69	6170.71	1103.5	643.672	1304.54	3616.28	660.899	2464.43	5158.17	2471.81	1980.5	721.931	3002.35	2749.15	2940.4	2955.94
M161T33	161.131	33.4785								1295.52	4338.31	1145.8	1910.01	1913.83	1350.68	891.369	831.957	586.195	1459.83	2201.33	1445.69	2440.16	1982.33	1840.45	1313.46	2264.96
M317T306	316.918	306.065								60599.9	55030.7	21231.9	47453.6	45653.2	39621.5	53236.6	52063.6	46905.3	47583.5	53662.1	59762.6	50230.9	56528.2	56527.4	57213.6	56527.4
M756T342	756.455	342.256								23092.1	48634.3	50476	28416.1	46289.3	26033.7	28613.8	43466.8	23608.8	43331.5	50342.2	49337	50561.6	33527.2	44475.3	44403.5	44514.3
M902T33	901.724	32.767								10754.3	4752.67	10879.4	2427.13	7018.15	2292.64	4751.54	8355	3040.44	2975.21	4735.25	2088.64	11262.1	2439.92	2439.88	2376.75	2363.55
M362T391	362.113	390.87								1431.54	1509.04	2669.51	1411.48	1752.23	2243.87	18582.6	14326.4	565.009	2911.04	1376.79	1510.15	3522.94	1922.56	1970.93	1960.09	2743.51
M1001T388	1001.02	387.707								10276	10654.4	5360.04	6270.12	9331.77	8137.05	8862.18	6239.21	17511.3	11292.6	10209.9	13855.9	862.905	9206.08	9621.87	9235.13	10008.9
M740T481	740.353	481.192								2090.81	4544.57	2840.66	4410.58	2700.1	2278.04	3006.89	7162.63	5292.88	3151.78	5884.8	3586.3	3443.79	4455.33	4808.07	4451.51	4558.44
M300T184	300.197	183.793								4112.5	3637.62	2791.78	4865.12	2837.43	5164.33	2644.39	4244.03	4652.76	3468.97	3358.44	2538.84	2058.19	5011.33	4651.16	4651.54	4649.55
M725T40	724.524	40.473								22008.8	22215.7	24256.5	17081.2	20313.8	30134.9	27147.3	22726	30355.7	28059.3	23227.3	30936	19055.4	23611.1	23554.9	25434.1	26673.6
M501T32	501.393	31.6055								6346.84	5223.19	4840.67	8082.05	8727.15	6993.77	7958.3	6680.51	9905.54	7121.62	7340.34	7343.99	12239.5	9456.8	9190.02	10714.2	9198.86
M288T407	288.003	406.769								26247.2	22138.4	27632.9	36976	36571.8	32946.5	29253.5	28935.5	33090.8	35636.3	25142.3	23205.1	31048.8	28648.6	30771.8	31058.4	31026.5
M585T307	584.811	307.425								32250.7	27093.7	23991.4	19093	21165.2	20765.1	28212.6	20149.7	22282.7	25697.3	26384.3	33675.4	23755.3	30597.8	30376.5	30387.6	32024.9
M304T383	304.174	383.405								13525.9	11228.2	8658.47	12509.3	8839.1	10461.7	11508.9	10010	6079.39	6663.84	7793.13	6283.85	9062.93	11370	11525.5	11918.6	11366.7
M961T342_3	961.461	341.509								31476.5	30851.8	27141.7	32224.4	30150.1	34591.1	35113.7	29986.4	33561	31127.8	34183	34115.5	29938.7	30629.6	31784.6	32089.6	32099.2
M464T197	464.31	197.194								7847.76	10472.9	6216.24	8591.24	6018.04	8143.45	8700.91	4804.22	6999.12	9090.44	8872.6	6229.43	6846.65	8217.03	8334.87	8679.89	7078.54
M199T50	199.106	49.784								4681.17	4173.65	6750.39	5735.62	2822.32	762.958	3902.08	5978.7	3317.75	1478.1	4625.02	3970.48	5820.79	3870.64	4271.47	4272.36	4264.61
M698T349_1	697.912	348.568								36831.2	22724.9	34556.4	24403.4	26036	26074.9	25231.7	25425.1	24301.9	39325.4	39343.5	38533.2	27210.7	31861.6	30392.5	30434.9	33246.9
M1086T189	1085.65	188.594								6801.21	6965.79	7377.15	9219.31	10890.3	8663.22	10081.4	5221.06	8528.88	6575.54	8756.43	8943.48	6965.02	9123.54	8206.6	8312.47	9306.26
M782T39_2	782.098	39.359								10781.3	4330.17	6320.26	8242.73	8514.32	15575.7	11112.3	5847.45	9598.16	13958.5	12371.6	12805.1	11985.7	10661.3	10789.6	11161.2	10662.3
M859T339	858.988	338.992								16677.5	21874.9	17188.4	20516.6	15580.7	21948.7	21339	13726.9	22538.7	16068.5	21851.7	20736	13247.8	20940.5	20583.1	21303.7	21058.3
M750T348	750.057	347.577								18333	18291.1	13613.1	18835.2	15709.7	19541.4	18867.7	17390.4	17098.3	16994.5	18790.2	16644.3	14298.3	17273.7	17288.1	17607.8	18229.4
M544T33	544.397	32.7725								5530.35	1456.93	7273.34	4414.08	4100.25	4576.84	5512.43	3797.89	3869.28	2057.25	5908.13	6384.53	10691.2	7215.15	7002.96	7898.06	7011.39
M257T35_2	257.127	34.748								1013.95	710.3	1172.4	1011.15	799.541	5582.16	4433.14	3682.76	3830.56	3658.2	3509.64	1564.98	768.179	2791.81	2725.25	2532.89	2877.73
M372T75	372.291	74.894								39878.9	28645.8	57940.2	33715.9	34708.5	17656.9	30135	38177.3	29611.7	18896	27549.2	36317.4	48572	39315	39639.6	39996	38286.3
M302T524	302.018	523.598								45110.2	53394	52757	46778.7	14555.1	34147	35825.7	31275.9	35527.6	29151.5	31205.9	33954.8	26819	36740.3	45798.3	36853.6	38352.6
M444T192	444.363	191.712								4789.38	4114.27	2483.7	4850.49	3795.61	3467.53	5625.73	2699.24	3925.93	3224.25	3242.28	2398.42	2896.14	3977.8	3296.36	3569.1	3325.55
M629T34_3	629.497	34.027								1124.56	6034.86	1405.19	3616.49	2742.05	3134.36	778.556	1447.63	4929.84	947.821	4727.27	3410.13	725.157	3067.96	2753.44	5432.8	2624.15
M304T241	304.21	241.152								9276.84	7430.37	4396.92	9145.24	7130.68	8454.31	8732.68	7898.21	7692.76	6877.27	6268.19	7215.82	8159.8	9908.24	9795.5	9908.15	9908.11
M657T437_2	657.328	436.81								8072.74	1056.6	4831.15	5166.9	2278.55	1448.05	2464.8	11859.9	8100.31	1563.96	8949.71	2078.03	18636.7	6240.01	6658.21	6151.48	6322.46
M743T39	742.568	39.266								13955.2	17934.4	12467.4	14540.2	17711.3	21790.3	19689.2	14314.3	15266	9150.1	19645.3	18290.9	14552.7	17006.5	16992.9	16987.5	13788.7
M706T48	706.461	47.8545								2001.57	6817.12	2774.8	4235.33	3420.36	4190.13	4338.93	3496.1	25666.1	4261.99	22115.5	23538.6	5845.1	16042.2	11361.2	3768.15	15182.8
M1031T341_4	1031.48	341.426								25662.7	34385	29380.5	35569.7	32487	38846.7	37255.8	26329.4	33608.5	32051.6	36551.5	34110.3	24594.8	34583	34606.2	34790	34790.4
M267T334	267.087	334.294								11771.3	8214.99	7265.24	7723.39	7917.57	10299.2	7053.03	7927.7	9192.6	9149.9	15276	11006.4	8050.06	10218.5	10509.7	10584	10583
M727T346_2	727.433	345.916								12936.4	16507	20573.9	14081.7	13765.9	21585.3	13020	13901.9	14721.7	15391.5	14718.5	24070.1	15483	13417.8	13796.6	13573.2	13799.9
M1008T341_1	1007.52	341.337								23669.2	30832.9	23128.4	31093.9	24861.9	33696.6	29603.1	20099.6	32691.7	22606.6	30411.5	27211.2	20367.8	27178.3	26943.4	27409.7	26949
M1131T341_1	1130.53	340.895								15968.8	24659.9	18487.6	27054	22364	24879.3	27089.4	17034.4	23177.6	17555.1	21971.5	22000.4	13893.6	20946.9	20941.9	22146.6	20958.8
M974T32_2	973.793	31.766								7044.95	2917.5	16846	2713.73	9396.99	3147.93	5985.54	9557.07	1145.27	2012.04	1129.96	852.732	10232.4	1101.99	713.796	1092.35	1008.11
M176T175	176.072	175.32								13369.7	11380.5	15287.1	11294.9	12864.2	14304.7	13163.4	12874.4	8406.03	9123.71	9797.7	10311.4	13387	12068.4	11897.7	11990.5	12214.3
M834T174	833.646	173.612								21907.8	24451.5	26108.2	21697.2	19902.4	27058.8	22503.2	21487	25222	21874	24966.9	20336.5	21517	25194.1	25254.7	24530.5	22306.3
M613T338	612.98	337.883								26971.5	33194	26911.1	32231.3	25989.9	31481.7	34421.8	21888.5	35474.9	25286	30376.7	32554.1	22265.4	33224.5	33222	33580.7	33563.3
M258T29	257.979	28.688								3188.8	4074	3626.03	3920.03	5060.66	12881.7	4226.77	4038.28	3287.68	11114.7	3409.69	4223.16	3714.43	3784	3783.05	3921.76	3921.7
M829T141	828.667	140.913								9018.89	15030	9470.1	12026	10251.7	7465.99	9361.64	11352.1	11208.9	4481.35	8190.28	7104.02	9301.86	9919.81	9437.63	10889.1	9429.87
M865T38	864.637	38.438								6808.41	8708.37	6706.2	5227.57	4683.65	7575.19	8133.68	6148.7	4921.9	4135.64	4151.69	3612.22	8637.04	5738.72	6233.63	6027.38	6539.67
M651T341_1	650.991	341.474								31320.6	37609.5	31580.5	39222.8	34412.6	40064.6	41681.6	31653.6	37635.6	30061.4	39062.5	37442.4	28983.8	36545.9	34406.7	36536.7	36536.6
M734T320	734.368	319.671								5551.33	2146.79	4224.96	4922.44	2444.94	2197.34	2607.82	8680.29	12203.3	1820.67	8398.34	2128.98	2969.34	5533.2	5533.06	5265.86	5491.89
M610T341_1	609.991	341.403								26645.6	30388.3	29378.6	32221.3	27013.7	37048.8	35262.6	21999.5	33415.6	25127.3	32654.1	29443.3	24195.4	29168.2	27570.7	29167	29165.9
M617T34	616.599	34.09								5574.17	4046.34	5166.22	3781.03	3848.31	1390.05	4327.21	1645.98	5142.19	4486.77	8455.48	3171.03	8642.14	5139.1	5032.85	5152.6	2099.27
M281T35_2	281.265	35.339								3485.8	2903.74	2597.18	3855.39	2717	5294.62	3666.98	2564.79	1405.57	5441.09	6139.01	5056.56	1328.6	4353.52	4854.41	4846.91	4654.22
M607T378	607.128	377.906								3642.25	4120.27	3614.44	2253.75	3476.98	4277.44	5225.59	1816.54	3918	2491.1	2531.83	4654.5	2142.24	4698.9	4848.33	4720.35	4998.54
M385T187	385.27	187.465								4919.19	4687.83	5584.34	3381.8	4717.49	3871.24	8531.21	3879.46	1607.44	4056.84	3711.65	3320.97	3507.32	3769.51	3680.69	3675.37	3913.29
M175T125	175.085	124.799								74265.4	93356.1	64426.2	107037	68377.8	47934.5	67323.2	83802.8	71041.4	33238.1	115297	102302	71619.3	85877.5	85878.8	86828	89590.4
M616T349_1	615.909	349.036								25156.2	27309.2	29337.1	27327	29384.5	28084.9	29566.5	34447	28649.4	27391.1	26911.8	27262.9	33947.2	32750.2	32816.2	34363.6	34359
M529T34_1	529.109	34.1345								1231.99	1822.91	1239.57	3430.16	2631.47	1918.47	2857.06	1500.44	1091.84	2069.6	2116.97	1009.52	997.022	1834.62	2039.43	1846.5	1945.72
M412T200	412.303	199.613								9252.19	9327.5	4243.06	7434.14	10567.9	7036.4	12687.9	6970.68	6894	6550.87	6125.42	9545.46	7232.96	8432.25	8268.79	8885	8271.96
M548T195	548.27	194.762								5076.4	5786.88	6861.94	5165.17	5755.33	9471.6	19372	4642.53	8656.29	7227.33	11659	6935.18	8423.68	6862.79	8433.62	8940.8	8974.68
M594T187	594.48	186.832								2710.46	3819.94	5136.94	2357.88	3104.7	3497.57	3551.03	4227.99	5226.41	2818.94	2941.19	4553.83	3806.52	4052.6	4546.25	4124.05	4062.84
M587T334_1	586.887	334.29								17344	17797.7	18761.3	18067.2	19092.8	19148.6	18559.5	20545.9	17244.6	20607.1	17476.6	19667.5	18997.9	18886.9	18421.7	19045.9	19048.9
M98T333	98.0564	333.398								4795.39	6166.96	6816.86	6089.22	3313.59	6074.64	6604.01	4968.32	4928.65	4567.42	6068.39	3760.48	4216.83	7345.05	6641.11	6631.16	6633.4
M832T38	831.956	38.005								4505.59	4075.22	3703.97	5645.67	4901.08	7140.91	4342.55	5102.16	7204.61	9433.01	6223.52	3199.03	5817.15	6125.42	6291.27	5911.09	5294.71
M391T26	391.26	26.4165								12283.3	11058.3	10489.3	3981.93	8540.77	13173.3	15207.9	8276.71	2898.48	17781.9	13166.2	14694.7	14567	11996.9	12005.9	11957.8	11952.7
M186T342_1	186.412	341.509								17556.1	18096.8	16444.7	6574.87	13847.3	20733.1	15405.1	14788.7	17992.5	17726.2	19186.2	20172.9	15012	20215.3	19729.5	18839	19936.9
M388T84	388.252	84.461								15676.6	18173.5	19435.1	5292.6	13498.5	19286.7	8604.02	18747.7	8461	5016.01	17441.7	7580.82	10233.9	14467.6	14490.1	14470.7	17429.5
M709T408	709.012	408.413								2057.64	1079.23	3337.73	5853.55	598.403	959.919	470.641	837.644	748.754	378.106	616.905	657.228	610.89	840.255	842.696	696.307	700.882
M361T34	361.271	34.169								6451.03	6840.21	3955.28	6066.53	5464.61	972.332	5604.81	4209.23	7144.09	775.067	7131.97	5343.96	4508.93	6086.71	6169.76	5923.54	5838.63
M243T33	243.209	33.331								1439.03	4409.48	1380.75	818.53	1338.2	529.81	1387.46	1292.89	2468.4	1964.92	3154.63	797.193	800.7	1515.1	1292.11	1448.11	1300.27
M438T190	438.295	190.486								4272.74	5784.68	5453.53	8163.06	5003.67	6133.1	5912.56	6326.4	6591.85	4662.1	6672.15	5530.15	6528.71	4820.45	4816.79	4815.29	4370.35
M490T199	490.287	199.034								13548	8716.77	9050.01	5808.46	9919.88	4861.32	10992.3	10109	9020.81	11633.5	9315.81	13799.5	11775.8	9435.3	9343.76	10613.8	9368.5
M1039T34_2	1038.78	33.7555								5311.46	5429.92	6115.98	5030.12	7182.06	707.426	4453.06	4098.17	5828.11	528.734	8154.95	3657.91	5701.03	3777.1	4225.05	4291.71	4101.95
M613T33	612.543	33.288								10369.5	9342.2	8671.17	8865.67	9024.53	4758.05	10498	8521.45	9885.99	5626.65	11553.7	8704.13	9418.96	9602.6	9122.27	10415	8927.88
M653T329_2	653.3	328.894								4386.31	3710.56	4481.72	1576.38	1742.4	2387.99	3584.92	2603.49	2699.46	7810.36	4928.06	4160.71	2271.61	4115.81	4372.86	4511.88	4502.78
M91T35	91.0532	34.7155								10910.2	8579.57	7521.68	6307.39	7702.54	7326.24	5931.52	7071.27	7134.4	8089.64	8312.87	9297.95	9475.78	8575.85	8888.62	8846.91	8586.01
M135T35	135.079	34.87								3345.42	5811.49	3018.33	2824.38	2667.85	4309.66	6452.5	4805.92	3509.93	2026.19	2183.18	5668.32	4907.15	9060.41	8741.05	9819.45	8757.51
M330T33	330.277	32.862								900.65	6469.03	4847.82	5321.58	4439.84	977.263	3802.58	6342.63	6666.83	943.959	5852.09	2759.42	3466.35	3869.49	3653.18	4013.86	3841.47
M964T198_1	963.636	197.795								7960.63	6821.27	7393.11	2943.75	7407.64	2092.31	7142.09	6335.66	5782.24	8080.53	7493.9	9272.85	9399.57	7349.16	7538.09	7541.56	6713.17
M392T34_2	392.248	34.011								9469.98	14314.2	12838	13771	8836.2	6233.12	11274.1	10205.9	8471.34	3194.01	7679.77	13192.2	11493.3	8726.61	9603.53	8623.83	8905.32
M151T378	151.046	377.941								74857.5	44281.7	67479.5	56228.1	54617.3	67307.6	65112.4	41312.4	89611.9	29692.5	40682.3	46486.5	42703.1	51959.8	62333.2	60083.5	68185
M1195T341_4	1195.49	341.467								17539.9	24764.7	18849.1	25153.7	21930.6	25651.7	23210.9	16917.2	25296.5	22174.8	24794.2	21263.7	16558.4	21856.9	23611.4	23813.7	23252.3
M261T416	261.143	415.828								11325.4	10013.2	9273.54	8956.66	7141.21	8043.62	8803.82	8949.48	8454.01	8156.67	12341.4	7378.9	7812.97	9854.31	9743.47	10057.9	10328.4
M514T32_2	514.398	31.7355								4672.54	7183.56	4984.75	4699.88	5256.59	4020.93	4737.01	4765.67	5736.85	5334.77	5518.46	7403.37	4671.62	6362.37	6372.32	6122.33	5683.57
M504T32_1	504.405	31.988								5976.5	6664.67	5124.87	6109.71	4705.09	4841.89	5466.12	4919.44	5515.81	5868.47	8033.28	5375.52	5542	6458.05	6582.63	6284.76	6556.79
M1174T397_1	1173.57	397.292								8213.43	19538.8	1530.03	10006.7	9387.74	12406.4	6079.47	6592.2	17886.9	13523.6	18484.5	12846.4	825.933	8682.47	8450.96	8544.32	9306.24
M1059T307_1	1058.66	306.726								17898.2	15230.9	12949.9	9279.59	8540.4	10583.8	14012.3	8890.08	12203.5	10753.6	12266.9	20428.2	10389.6	15921.7	16807.9	16485.7	17885
M594T302	593.838	301.911								9285.17	6497.62	5790.86	5493.19	1837.68	2270.31	5193.94	4779.21	5065.05	1573.7	5209.05	5584.02	2530.02	5540.63	5405.88	5496.21	5083.14
M432T341	431.64	341.499								11162.7	14552.1	14997.4	14020.7	12952.1	14097.1	14032.1	10201.8	14145.9	10879.4	12177.9	10135.4	9629.53	13575.3	13335.5	13622	12910.3
M422T348_1	422.047	347.827								21849.9	20354.3	16246.4	20130.1	17091.7	20495.5	19870.9	19194.6	17900.3	16076.1	23064.3	16968.6	14376.1	19729.3	20016.4	18666.8	19934.8
M327T31	327.197	31.3215								7442.17	5364.08	7097.45	6718.69	4753.3	5137.95	7110.41	6742.42	6597.48	4800.19	5593.68	5832.01	5984.83	5916.69	7128.88	5957.89	6325.75
M273T207	273.083	206.861								8887.22	12102	8237.39	5400.62	6522.67	8553.7	10528.5	7571.1	7558.11	7630.64	8484.27	9180.1	6085.86	8987.48	9272.61	9314.21	9314.37
M715T343	715.453	343.343								38776.7	45653.7	40825.2	20877.6	39519.2	42251.5	24651.7	42180.4	26595.1	42738.2	26133.5	43794.6	40423.3	24545.8	24552	26678.6	24542.3
M110T440	110.07	439.997								38457.1	48042.3	39355.2	21004.3	47348.1	44201.8	43476.8	39313.1	35616.9	34047.7	43342.6	38182.4	34512.2	44346.7	42834	45527.1	47075.5
M509T34_1	508.542	34.129								3530.98	1264.52	7119.57	1720.22	3602.8	1453.12	1967.16	3733.84	2029.01	2754.19	1693.13	2003.07	10808.1	2143	2664.63	1986.46	1971
M1002T341	1002.46	341.479								28814.3	31405.4	31740.8	36422.4	28164.6	33680.9	34979.3	29385.1	31503.3	30361.1	31056.6	31524.8	25980.4	31774.7	31474.8	32091.1	31479.9
M855T471_2	855.094	471.249								19622.1	1093.01	2338.06	1826.07	6835.38	10942.6	3594.08	14392.2	1190.06	1052.93	22435.9	5519.23	19363	8820.14	9396.25	9392.19	9221.71
M797T342_2	797.456	342.143								40080.6	26108.6	38407.7	36783.5	41388.6	38388.9	22967.1	40685.1	39345.5	40156.5	38991	37110.3	41209.3	31123.5	33928.4	33839	31303.3
M616T335_1	615.909	335.007								12028.4	13686.2	13627.6	14030.7	14441.5	14981.7	13763.8	13566	15540.8	15528	14929.3	13954.4	13367.1	13643.6	14117.3	13643.9	13723.6
M506T35	506.49	34.724								2735.46	3018.47	1284.61	3944.44	2945.86	521.192	1502.82	2468.44	2078.81	2088.4	3423.65	2341.16	3706.04	2480.85	2720.76	3093.38	2636.13
M617T32	616.528	31.719								13699.3	6365.74	12174.3	5839.32	6900.47	6996.46	7438.97	11416.8	7187.62	8428.17	6903.54	4231.64	15089.1	6609.03	5780.2	5630.92	6043.1
M616T32	616.492	32.171								14962.7	3765.45	3845.59	2185.67	5021.31	4160.16	10248.8	11641.8	3710.7	2404.55	4077.16	3025.42	3923.57	4418.36	3987.49	4009.02	7251.04
M848T489	848.391	488.691								3272.88	3532.86	2629.21	4539.16	2583.03	2287.34	2967.74	3617.12	7211.97	3659.61	4939.27	3449.9	2883.18	4221.93	4562.75	4694.57	4690.08
M218T125	218.091	125.061								103598	59854.2	88564.6	93714.7	57529.7	30864.4	113640	129593	66880.5	45527.3	124379	120045	61265.9	96986.1	98520.7	66087.9	98062.5
M847T140_1	846.532	139.726								10448.9	14678.2	15308.4	12928.8	11766.1	13126.9	9279.28	9763.14	12151.2	12264.5	12352.1	14067.3	16122.1	13311.4	13340.1	13328.8	14697.7
M683T449	683.061	449.235								18695.2	15767.9	17352.9	35493.4	19412.3	17828.8	16733.2	20150.3	17544.4	21402.3	15873.8	15438.4	18443.6	15767.7	15169.5	15169.8	15176.4
M157T127	157.081	127.239								33743.8	25659.8	34013.7	39403.2	36603.7	21081.3	36999.5	29653.7	35827.4	41972.8	30919.8	28225.9	69072.5	40271.4	40430.9	54796.4	40307.9
M592T187	592.464	187.386								5376.56	7232.53	6128.11	6010.05	5569.71	4466	5112.37	7563.44	5593.43	3974.77	5379.56	5664.62	4054.97	6613	5837.48	5833.84	5827.81
M821T347_1	820.916	346.884								23507.4	22056.4	22304.5	31125.7	22485.8	23976.9	26536.3	40919.6	37086.5	26430.5	21954.9	22742.5	23844.1	22059.8	23750.4	22052.1	22328.8
M1041T34	1040.8	34.0755								4447.15	3861.67	11610.9	3220.21	9015.14	1155.77	7308.71	3598.71	5962.93	1489.02	4291.79	3960.58	4499.47	3609.53	3610.52	4160.44	3592.27
M183T35	183.077	34.834								4824.98	4393.9	4166.1	4685.25	3045.06	7055.89	7689.06	4495.96	4098.11	3116.09	4587.24	5125.04	4736.52	2568.51	2561.17	2566.1	3019.67
M926T33	925.796	33.4075								8406.12	1068.83	17405.3	1532.45	8554.67	1680.29	2777.15	10671.7	266.924	1351.84	1403.5	301.264	13673.2	105.211	105.049	83.4465	98.3146
M586T305	585.902	304.586								26635.7	37383.3	27004.4	27310.2	30193.4	21137.2	30094.4	25868.6	27972.1	18109.8	31977.9	32903.2	22438.4	32677.1	32346.7	32926.3	32349.5
M664T33	663.565	32.8185								3421.79	6187.3	2556.22	1739.65	4868.24	1816.74	3739.64	2624.03	2182.31	3279.76	3075.33	3185.48	2275.29	4187.46	3781.02	3901.82	3777.07
M104T194	104.105	193.532								5910.94	5487.43	8522.92	10912.9	6449.37	5509.16	5468.63	5936.91	11313.6	6887.39	9115.56	4807.19	7000.47	6858.58	6882.25	7428.59	6915.52
M341T197	341.303	196.572								5280.14	9763.88	6641.59	9808.67	5587.4	7069.05	9049.67	2187.14	8685.71	4498.63	10832.3	8002.63	6445.65	8608	8896.87	8901.25	7378.22
M920T342_2	920.46	341.504								31875.7	36224	32772.3	35155.6	31633.5	37286.5	37307.4	32651.4	34815	32940.3	19435.1	34002.3	31672.7	35830.4	35262.8	35812.2	33942.9
M534T350_1	533.907	349.787								25496.9	25605.6	27386.3	25740.2	30344.5	29546.9	46086	29440.9	40803.2	33087.9	27778.3	29292.1	30328.1	28875.2	28695.8	27667.8	28966.4
M184T470	184.072	469.852								24968.8	24842.4	20002.2	25368.7	18295	22551.7	5567.39	16591.3	19615.1	18882.9	23659.2	21564	14225.6	23811.2	25209.1	24827.6	25197.3
M1043T342_3	1043.46	341.518								26821.5	30144.1	26264.2	31130.8	31907.9	33143.2	33796.7	28550.5	33513.9	29735	30350.8	30353.7	27523	29077	30049.8	30046.6	29617.7
M985T34	984.734	34.003								3231.29	3987.21	2186.98	3865.91	3893.12	394.234	2790.69	3965.49	2974.27	707.241	5581.81	1652.92	3946.85	3696.06	3546.47	3369.4	3368.91
M428T33	428.204	32.884								5015.1	3210.36	2946.76	4089.48	817.699	3187.39	2109.19	2647.88	5440.67	3958.65	4181.66	2447.48	3836.74	3470.22	3463.41	3630.54	4134.32
M158T51	158.059	51.05								20236.1	20871.5	19239.2	51606.1	16793.3	5321.96	18457.1	25557.7	30501.8	13115.4	18620.8	22926.7	22460.1	20055.2	18681.3	18598.6	19055.6
M804T177	803.676	176.867								38295.7	15395.8	27220.8	7517.86	25720.3	21406.8	14695.8	34954.1	21308.2	30266.8	20393.7	14724.6	27091.3	11062.1	11021.2	15623.5	11219.3
M583T196	583.319	195.96								3948.1	8509.66	6435.06	8671.07	3764.65	9304.69	5615.18	5160.18	7546.56	5085.84	6424.7	4660.28	3334.08	6322.02	7367.41	6068.19	6078.36
M360T409	360.009	408.742								6378.06	4123.86	8007.39	11317.6	2566.1	3044.2	3017.78	2787.98	2656.77	2400.56	2238.63	3548.6	2873.52	3243.53	3316.38	2941.56	2888.66
M633T344	633.45	343.943								42040	40454.4	42396.4	24371	28882.6	24647.2	26868.4	44433.5	26226.8	42677.2	45170.1	25791.4	42048.1	26076.2	25155.1	23245.3	24699.4
M344T79	344.226	78.525								12780.7	13330.5	9801.12	6090.32	8247.03	16210.4	8045.23	14689.3	7879.94	6919.34	18123.5	7970.7	9089.2	13406.1	11811.2	13402.8	13187.7
M99T278	98.9826	278.188								1897.66	912.932	1242.53	73288.7	990.945	1207.64	1352.95	1524.16	773.284	1213.26	2233.72	984.274	1062.37	1167.07	1165.75	1160.14	1007.4
M865T138	864.64	137.865								15690.7	18118.3	19625.1	17232.8	19857.6	12857.5	17220.5	17320.4	17541.4	14196.7	26428.6	17906.6	29268.9	19318.8	20085.2	19663.8	19173.6
M261T35_1	261.131	34.822								2572.85	674.569	2057.5	1689.36	939.885	6675.34	8081.47	6843.33	5248.09	4900.93	3686.95	1528.15	1668.5	3156.4	3036.31	3649.52	3028.74
M354T34	354.168	34.077								1097.73	991.956	974.828	967.981	808.184	889.61	810.84	1193.94	1056.86	747.979	9895.88	1409.25	1092.26	1156.84	1042.37	1115.88	1155.27
M841T136	840.584	136.013								21482.1	16017.2	8584.57	11269.2	11682.1	5753.74	9916.49	13555.8	10727.4	7306.84	15700.8	25016.6	14455.3	11632.4	13207.7	11661.1	12176.2
M1090T475_4	1090.42	475.32								5974.73	8102.77	7647.51	7001.54	1025.55	7527.7	7019.7	2760.99	13970.3	7096.14	7568.7	6709.55	24.4666	7400.71	7459.85	7162.09	5695.48
M346T35	346.171	34.704								2517.41	2388.64	2428.95	2009.58	1900.27	4187.41	5668.07	5033.51	5542.12	2690.05	4125.42	3520.68	2208.94	3591.35	3976.23	3440.58	3081.12
M628T70	627.53	69.845								29737.1	57981.8	66255.8	48608.6	58266.4	19422.5	31610.6	56811.3	57187.5	36333.7	53216.7	52490.5	61819.2	36078.7	31334.2	32479.8	31353.6
M997T194	996.681	194.144								4810.91	5058.44	4657.65	5271.05	5103.45	4816.67	6518.39	5282.33	3140.1	4133.32	5082.96	3533.94	5035.03	5413.41	4762.41	5175.82	6026.13
M803T142	802.531	142.145								9530.67	5996.53	5728.66	7528.71	11439.1	5509.2	6939.47	7980.89	9332.22	9687.38	8009.73	6573.12	7961.19	8487.18	8084.74	8082.72	8284.81
M1184T341_1	1183.51	341.445								14197.3	22630.6	17372.2	28563.4	20676.5	25668.6	24835.9	16133.1	24014.8	11880.4	22256.5	18606.4	16239	21444.3	23728.2	22219.7	21736.6
M711T185	711.066	185.045								32917.2	23959.2	36639.8	36764.3	37488.3	7759.04	19826.3	35995.8	37806.2	25314.9	17358.4	25376.8	36846.2	24281.2	23909.4	26610.4	26595.6
M529T34_3	529.26	33.641								5006.52	4178.35	4013.05	5051.03	6177.64	6441.2	4080.65	3367.82	5763.4	4442.55	4574.31	4111.85	6471.54	5015.99	5272.29	5422.74	5807.33
M714T379	714.374	378.521								1580.53	2351.3	3537	650.879	443.432	401.96	1537.56	533.284	1479.37	2696.68	1227.03	1615.11	441.142	2343.76	2077.46	2054.61	2055.65
M608T162	608.461	162.173								10460.4	23791.8	13134.6	24535.8	15067.3	3153.93	24315.2	1231.39	23353.7	13960.5	27529.7	18161.2	7323.06	22721.2	23746.8	22907	24890.5
M371T49	371.288	49.078								5043.85	6551.72	6387.41	5489.95	6531.05	2497.87	6228.7	8636.12	4148.55	2971.15	2308.58	4932.96	5756.23	5326.71	5141.69	4703.7	3726.48
M496T302	495.861	301.611								9227.4	6593.17	5678.47	5642.28	1685.37	1910.81	4589.49	4566.83	5312.96	1685.79	4992.79	5573.54	2243.62	5353.44	5382.2	5136.05	4983.87
M417T378	417.097	377.59								4537.32	4252.53	5365.18	3901.71	4091.25	4752.1	5693.62	3998.06	5207.6	3672.53	4493.93	6385.77	4097.19	5813.98	5593.94	5895.58	5895.14
M429T35	429.299	35.1445								1676.96	2272.1	1800.42	1983.25	2157.12	2904.97	2263.71	810.331	3106.12	1632.71	1811.31	2353.67	1894.33	1714.03	1512.61	1532.95	2153.48
M661T344	660.96	343.988								28533.3	55169.7	49464.5	30504.7	29950.9	58906.1	36230.3	52316.3	55761.1	53511.1	54108.6	55056	29787.1	52101.6	55523.5	55522.3	55523.1
M575T349	574.908	349.183								26826.9	37783.5	26299.9	38580.1	41783.8	29104.4	28804.2	28628.2	26876	30920.7	42496.8	27243.9	44274.8	26372.3	27934.6	27935.2	27935.3
M334T412	334.081	412.218								12642	6123.5	12814.6	10172.9	4157.26	6242.25	5514.99	9825.45	12074.3	11271.1	11648.9	11990.4	11723.5	9352.44	10663	10683.3	10138.4
M703T494_2	703.338	494.301								9083.01	1106.7	1459.73	981.849	4088.14	7375.17	2156.27	6118.15	1455.58	1122.07	10182.6	2611.09	6288.86	4426.66	4437.21	4427.16	3748.53
M698T335_1	697.912	335.073								13350.9	12689.5	12242.4	14422.5	14723.5	15750	12994.3	13730.9	14010.2	14225	14309.3	13376.5	13989.4	14262	14545.7	15260.7	14267.6
M436T200	436.279	200.326								10009.8	13501.4	10923.7	11276.6	9243.02	12368.9	13388.6	8101.53	12968.7	11249.7	16111.2	10591.6	10489.4	11167.8	10780.5	11146.7	11169.7
M586T32	586.437	31.8655								6588.6	3985.71	7391.25	3532.62	5558.55	7354.36	4136.19	476.944	6602.38	4971.83	5282.47	5536.63	5477.69	6205.8	6520.04	5903.96	5912.77
M863T32	862.687	31.649								11015.8	2771.31	2570.05	5047.85	5387.68	3995.53	7465.15	4602.14	5496.11	1747.68	6512.63	4909.91	7557.88	6108.19	6322.12	6815.44	5550.98
M903T346_1	902.919	346.389								17103.7	29627.8	30343.3	31080.4	22610.2	32723	15636.2	25893.5	19099.7	17928.6	17450.6	22555.5	21318.4	19518.3	19473	19772.9	19472.8
M623T347	622.949	347.419								39385.9	37126.6	53324.4	39054.7	34981.9	68397	54318.3	19833.8	60420.3	42492.9	61307.8	23331.4	32325.6	32409.3	47819.7	44242.9	45868.4
M1014T343	1013.94	343.41								39987.3	23123.5	37350	46314.5	41968.2	43089.5	41408.5	34403.2	26358	41836.7	43017.4	23125.7	41251.7	30798.5	38262.7	32788.1	26239.8
M825T102	824.553	101.579								28817	36774.4	22239.1	38719.9	44830.8	49345.6	41949.5	64949	42658.1	58671.6	43077.9	41874.3	39719.4	42774.5	30509.6	42748.3	42709.2
M703T494_1	703.004	494.34								9726.58	1064.4	1254.2	763.278	4371.15	7096.34	2326.4	5606.89	1369	1061.08	10810.9	2582.94	5312.89	4214.59	3936.34	4072.84	3826.38
M739T347	738.913	347.388								24054.1	22642.1	21428.8	23062.5	26447.9	24913.1	26755.9	39913.6	39030.4	26192.2	24764.3	23981.3	38409.2	23977.4	25818.1	25820.3	25824.9
M551T35	551.186	34.7655								3332.47	3056.91	2827.34	3295.46	3406.14	2942.09	3708.2	3311.97	3250.95	2162.6	4027.16	3152.8	3449.65	3312.59	3406.26	3479.9	3480.47
M397T603	397.163	603.408								79962.7	177871	87145	92923.8	136340	36549.2	37809.7	78806.7	48115.8	49825.5	67460.6	72409.5	15039.5	69903.6	62665.7	70132.2	66661.3
M334T110	334.236	109.503								29064.1	13581.7	11679.7	11783.2	11887.3	9667.7	11657.7	26335.1	16048.3	10028.4	17640.6	14111.7	21805.1	18057.1	18058.6	18920.3	18284.6
M887T198	886.545	197.793								9367.31	13417.6	10893.7	10581	11845	10711.8	12229.1	8413.04	12836.2	9459.36	14308.6	10658.2	9712.16	12253.7	11849.2	12272.9	11056.9
M834T156_2	833.644	155.614								60458.8	44327	30069.1	72146	59243.4	65615.6	55924.6	28910.3	46252.6	54997.3	49459.4	44419.5	34764.5	69780.2	59965.8	52374.5	56138.3
M761T341_2	761.468	341.418								9010.45	7127.03	7283.98	10645.2	6889.44	9960.09	6665.63	4951.5	8294.46	5775.71	7774.28	7407.91	6221.49	6144.5	7262.94	6463.48	6127.68
M244T239	244.091	239.059								22737.4	21205.8	10892.9	17095.9	15349.8	17862.7	15773.8	16544.2	15821.5	15182	22318.7	17857.2	15096.6	19970.9	21364.6	21331.5	21364.6
M518T342	517.977	341.513								4228.87	1426.68	14603.9	18297.2	15794.7	18811.5	2934.23	5223.21	3545.19	2616.06	3333.36	17923.3	5770.94	16163.2	16782.6	16781.3	16781.6
M221T272	221.184	272.347								6582.03	8970.38	9402.65	6851.88	16512.7	11731.5	7251.29	4686.95	5570.71	5465.58	11462.5	6203.36	5090.88	8482.07	8512.59	9084.87	9366.44
M159T438	159.075	438.359								42813.6	45032.4	43515.2	16280.5	29713.2	24500.7	26853.2	25838.5	28566	24809	17526.2	28894.8	26680.9	31621.5	27159	29030	26726.9
M248T28	248.068	28.4325								3308.55	4756.28	2762.47	3414.85	3816.94	1575.75	5736.2	2216.46	3147.77	997.388	5689.25	4589.42	3821.18	4263.83	4423.61	4160.62	4315.37
M372T70	372.258	70.1275								5822.19	1900.7	54396.7	742.479	1988.53	390.445	889.748	2640.38	1797.24	398.763	916.494	11913	506.352	1742.64	847.456	661.755	5509.67
M877T136	876.677	136.016								17871.5	19304.7	19172.8	20931.1	19056.2	13237.4	17227.9	17766	20039.3	10262.6	19038.3	14617.9	18867.8	20514.9	20764	19575.5	19572.3
M1100T189	1099.69	189.255								4004.91	4221.6	2476.6	3084.65	4877.84	5084.54	5002.37	2329.65	4134.11	4408.06	3430.65	2518.22	3202.61	3902.46	4112.66	3450.58	4106.87
M862T485	861.882	485.389								2332.7	1524.14	1826.76	5749.13	3727.48	1799.49	2355.79	2386.76	1709.45	2714.54	1625.74	2118.06	2246.41	1820.58	1820.07	1898.63	1896.5
M780T347_1	779.915	347.346								27506.8	22430.3	23835.4	22660.7	24612.6	23332.1	26393.6	24178.6	24409.5	40846.4	25478.1	22587.3	41307	23301.8	23554.8	23690.7	23301.6
M575T335_1	574.907	334.992								12115.7	12702	14019.9	12398	13586.8	15155.9	14085.2	13014.5	13604.8	13787.8	13408.5	14314.5	14023.1	14371.9	14370.9	14816.4	14490.3
M413T431	413.032	430.796								4044.28	3091.03	4269.27	11633.1	2224.19	2086.74	1618.08	2871.41	2931.8	2305.19	2344.16	1384.76	1808.64	2495.27	2117.32	2392.21	1959.22
M95T373	95.0591	373.432								41032.3	59921.4	33204.8	48970.3	45086.9	29728	59193.7	30297.5	46191.3	64427.6	19560	54091.5	49209.8	58369.2	41282.4	41298.3	41200.2
M1031T34_2	1030.78	34.132								3440.74	3429.77	3436.32	3126.87	2289.14	405.287	2397.04	2432.56	3265.42	116.438	5139.27	2992.95	4392.38	2574.98	2888.3	2573.85	2574.5
M1175T448	1175.11	447.584								6540.57	5469.76	4864.73	5245.16	7298.49	5155.65	6772.25	5710.04	5654.04	5527.08	6105.54	6776.76	5224.49	6364.39	7294.67	7269.71	6995.74
M252T215	252.052	214.544								6729.37	4416.02	4511.81	3364.1	1423.61	9008.88	4404.89	4742.99	3987.19	5101.56	5751.81	6563.61	4361.39	7765.47	7764.47	7927.53	8043.85
M367T336	366.973	336.348								20160.2	25540.6	12475.9	13651.4	20851.7	23823.4	18925.5	14739.5	16870.4	18137.7	17955.9	20399.8	10439.5	19665.7	19141.4	19143.8	20072.1
M249T256	249.059	255.715								11088.4	15623.2	10124.6	6603.35	6804.12	13170.9	14180.2	8112.04	15613.1	10163.8	15466.1	16642.9	6102.63	14652.4	14651.1	15095.8	15364.8
M674T343	674.451	342.773								36125.9	19292.8	35662.1	35226.6	31253.3	36031.7	41174.8	36059.6	22618.6	31969.1	21343.6	32628.9	40918.2	22978.2	22827.6	27790.7	22808.9
M512T26_1	512.206	25.885								1264.69	2445.5	1221.3	1725.29	768.006	3663.3	1034.33	486.146	203.871	2592.21	754.215	784.934	895.574	935.225	933.862	1442.42	952.031
M547T34_1	546.52	34.133								4132.83	4637.68	707.052	5679.26	3755.99	3791.57	4649.44	6254.7	4617.05	4649.67	6985.41	5190.49	5672.92	5259.93	5270.77	5073.35	4365.43
M856T341_1	856	341.426								22334.9	27668.5	19250.8	28438.2	23359.2	30033.1	25893.4	17926.2	26309.2	19942.4	27154.1	24852.5	20466.3	24739.3	23425.5	25256.4	24412.4
M791T480_2	791.38	479.969								6973.51	5997.98	3710.95	5139.54	2765.21	3146.23	4733.6	6560	9141	5709.63	8235.44	5807.18	4468.37	5185.48	5196.32	5348.13	5583.93
M253T54	253.214	53.731								2669.8	2833.87	8542.79	4476.66	8367.49	2760.94	3589.02	9411.51	2904.55	2471.21	6421.72	6703.85	6091.92	3176.45	3518.27	3182.47	3740.54
M459T348	458.942	348.499								45870.3	48938.4	46043.5	48288.5	35021.4	46999.8	53717.8	44490.4	32445.2	33333.3	33454.4	50251.7	45772.3	34149	34273.7	38563.4	35715
M488T32_2	488.383	31.766								4629.86	4069.68	5120.86	4393.03	1817.21	4467.11	2496.96	4497.6	3521.18	2847.08	5834.6	2828.27	3648.98	4357.43	5416.53	4351.93	4346.12
M677T342	676.868	341.505								4387.12	8606.53	7726.45	8742.41	6498.74	8060.14	6915.15	4524.9	8772.11	5939.92	7658.28	7404.74	5274.22	7291.02	8652.73	8640.42	8363.74
M998T195	997.62	195.36								9517	9513.33	8498.39	5519.1	9765.57	5780.04	9344.46	8593.28	4377.9	7570.06	7519.98	8134.01	7014.63	6835.63	7117.07	5944.75	7087.01
M262T465	262.102	464.69								19831.4	16750.3	22158.9	16859	16138.2	12820.6	12677.7	15388.6	6794.42	15350.1	15203.2	9012.35	15977.9	4528.27	13315.9	13260.7	13353.4
M1096T342_1	1095.95	342.147								28753.6	16490.5	28537.5	19256.6	27041.4	30576.8	36486.1	32199.9	30172.7	29938.8	18314.2	31023.1	30455.4	18556.1	18086.6	18061.6	25407.9
M879T342_2	879.458	341.907								35780.6	36871	33792.9	40405.2	38721	40963.8	42410.5	34175.2	39831.3	36452.7	42578.4	38838.8	34647.3	38089.9	27334.3	37501.7	38123.7
M797T101	796.522	101.417								24949.8	36481.9	25044.4	37576.4	33994.7	77471.3	42629.6	29040.6	80473.4	54513.5	43910.5	40366.9	38994.4	33468.1	41619.2	39351.2	43813.7
M332T222	332.241	221.84								6973.87	5807.67	4097.48	7101.27	6847.53	8061.17	7494.28	5795.57	5850.7	4059.66	6014.63	4992.29	6843.17	7861.74	7862.13	7863.93	8379.07
M583T495_1	582.586	495.117								2381.58	283.209	953.382	482.804	1589.01	1454.93	982.748	4165.26	1887.41	428.397	3449.91	892.573	2684.74	1657.68	1802.87	1845.7	1742.64
M1143T341_1	1142.51	340.892								18553.2	26170.6	18212.1	25592.7	24039.7	25812.9	25416.5	17742.8	27233.6	17599.7	24618.8	22840.1	14624.9	23735.5	25254.6	25947.1	24460.8
M132T50	132.043	50.296								17508	8874.32	11168.9	10210.1	12160	1547.68	11165.7	21876.3	13140	7742.81	13617.4	13105.8	16294.7	8896.53	9572.99	8011.33	9283.04
M809T140_3	809.035	140.091								9480.66	9593.6	10102.6	13363.2	10160.5	9419.55	10972.3	13138.7	14213.1	12213	14461.8	10073.1	11888.1	8761.27	10206.5	9771.13	10185
M672T448	672.071	447.761								11085.1	8967.48	9900.94	14498.1	12015.1	9342.12	8524.63	11022.3	9276.1	10955	9543.09	8602.02	9283.18	8332.15	8332.88	8327.58	7409
M797T355	796.85	354.782								1193.24	1355.66	1428.66	1143.36	7542.49	1827.6	1905.33	1586.88	2739.93	1611.88	1813.44	1629.48	1720.32	1744.22	1743.38	1778.32	1854.85
M889T31	888.698	31.3455								11924.1	6060.44	5349.49	5188.93	4338.67	5227.07	4210.75	3910.41	2852.68	3711.39	3891.27	2342.71	8162.7	3261.41	3262.86	3804.46	3247.35
M583T495_2	582.921	495.424								2333.13	202.57	763.097	617.979	1481.27	2077.83	950.898	3219.46	1682.99	311.446	2683.48	918.57	2218.13	1389.05	1448.42	1515.91	1393.54
M676T160	675.539	160.432								15804.7	32455	10410	30433.9	17183.8	33105.4	34697.3	9200.87	35130.5	15193.1	33155.6	29963	11193.7	32732.8	34402.9	33051.4	35609.5
M324T176	324.117	176.281								9433.5	10208.8	5750.85	4527.21	7704.53	2536.27	3399.38	10971.4	4877.76	2296.08	4852.41	9439.42	1456.8	3587.39	3523.95	3525.9	3792.15
M431T78	431.313	77.79								23629.5	23753.2	29029.4	18742.2	20913.8	11535.7	14856.3	22559.1	14962.2	11813.8	9818.51	14569.7	11509.1	19448.5	21473.1	20650.7	20332.6
M298T33	298.309	32.956								4869.74	4560.7	6728.86	3735.76	3412.7	3440.42	2861.86	2977.98	2529.84	3208.12	3848.72	4240.58	3511.28	5055.32	5053.35	4227.88	4949.38
M710T32_2	710.389	32.182								4260.82	8207.31	5585.73	3846.55	4176.52	3633.5	5724.03	5030.91	5004.65	4615.07	4574.1	4849.3	2956.37	4154.4	3830.65	3598.91	3613.17
M394T34_1	394.19	34.086								5848.93	4835.99	4390.81	6160.41	6141.67	2323.53	3508.26	3970.65	3588.06	3755.66	4914.62	5469.11	4480.71	4889.94	4800.74	4798.03	4888.62
M501T187	501.05	186.871								30630	9742.96	18022.2	21862.2	16798.8	26122.8	14874.3	17587.6	18832.4	14946	22849.4	7072.88	24975.7	13261	13273.2	11663	13269.2
M481T34_1	480.51	33.6								3241.37	2895.43	7813.42	2787.8	2030.21	1774.29	2626.7	4530.91	3750.34	1913.74	1343.89	2151.59	9264.97	3311.45	3147.41	3293.68	2853.68
M608T488_2	607.942	488.21								5055.59	5417.78	3817.39	5779.96	3462.86	4140.2	5534.81	4777.57	6862.71	5929.81	5714.93	4805.32	3083.23	5761.85	5769.83	5766.56	6329.08
M497T194_1	496.973	194.14								7666.94	8402.8	11070.6	9665.46	8164.9	11059.3	10945.8	5937.86	10687.3	9080.37	10587.7	11119.1	6264.52	8772.64	7901.51	8763.39	8541.45
M692T343	691.94	342.683								470.127	531.323	157.368	599.962	510.741	12019	290.072	587.224	135.649	522.012	206.02	245.647	467.697	4058.68	586.148	850.55	576.453
M419T34	419.347	33.995								2724.11	8914.47	2171.25	4483.1	1641.35	3031.48	3885.75	3321.25	5784.16	649.862	3632.11	2543.05	2920.18	4119.09	4269.25	4277.76	3625.29
M158T35	158.152	34.7805								4875.09	3140.89	4673.91	3494.51	4107.49	2132.28	2736.29	5099.71	3246.24	3038.71	7590.27	4932.64	1397.62	3057.18	3141.58	3468.02	3468.9
M1019T307	1018.73	306.628								13422	10860.4	8915.4	7322.62	5870.36	7188.19	9554.58	5910.01	8907.47	6763.6	9198.21	14924.2	6076.79	12351.2	12261.6	12262.5	12597.8
M169T34	169.084	34.129								2914.96	2466.22	2905.92	2651.08	1696.5	3184.33	4400.3	7759.43	3654.35	3272.17	3428.28	1842.11	3704.07	4873.19	5007.44	4872.87	4873.25
M742T158	741.525	158.062								16443.6	27447	15465.5	30602	20058.8	34714.9	28127.2	20955.1	26800.7	27105.1	30184.8	22406.5	15425.4	27148.6	27389.3	27199.6	30580.6
M822T485_1	821.868	485.044								4247.79	5483.85	2800.55	6091.42	3823.84	3946.96	4684.67	4234.97	4780.24	4530.95	3698.46	4760.82	1355.34	4757.64	4431.83	4774.13	4825.79
M243T448	243.064	448.013								10665.8	6611.19	7829.14	12968.2	8369.4	9140.37	7242.89	7429.15	9765.88	7425.17	9746.26	7546.71	7201.8	8433.6	8893.32	8435.05	8472.84
M130T578	130.085	578.018								50351.2	80047	49401.8	25433.9	106435	40993.1	56807.6	31910.8	17923.1	57402.8	100370	61102	22779.1	48860.6	33384.2	34202.8	37902.6
M546T34_2	546.285	34.003								3735.68	3465.17	3061.54	3197.11	3236.8	2221.59	2164.36	2144.46	2957.47	4432.71	3963.11	3402.18	4240.84	4406.04	4114.64	3904.32	3886.19
M493T350_1	492.904	349.949								26341.9	37140.4	25787.7	24590.7	28173.5	27756.8	28772.5	26929.3	26146.7	29594.2	40225.5	29840.4	28043.4	24682.5	25991.8	24683.1	24996.4
M397T19	397.163	19.445								66258.6	51820.7	64629.1	28491.2	36135	50593.4	26024.8	62587.3	61786	54845.5	52820.5	57599.8	46019.2	55684.8	55004.7	53328.1	50949.2
M1035T33	1034.75	33.407								3131.97	3410.78	4117.3	4060.23	5190.78	2389.55	4611.75	2661.52	3980.61	913.62	6131.13	1785.92	5189.64	3366.83	3058.6	3411.54	3410.96
M574T32_2	574.485	32.1595								5488.81	4296.41	4647.39	3453.14	4005.49	3603.49	6460.69	6486.71	4344.11	5466.08	6586.55	4964.49	9565.54	4984.5	4990.63	4597.89	4844.9
M904T195_2	903.576	194.763								3681.54	8330.34	6018.49	5080.21	3825.97	6066.37	6636.48	3552.07	9487.58	5266.13	9319.75	4442.71	4906.65	7299.13	6845.94	6478.76	6576.68
M564T189	564.434	189.22								5837.99	5833.39	7288.52	4634.34	5682.05	7812.66	9006.45	7970.89	6230.51	3456.19	6939.13	6155.47	5378.2	8591.89	8126.01	7972.5	9866.66
M748T33	748.406	33.377								2651.74	3079.81	2914.08	3662	6077.67	2195.57	1943.34	2780.03	2882.38	3375.22	2802.64	2759.49	3902.72	1747.87	1742.62	1836.14	2052.04
M865T152_2	864.643	151.859								5146.81	4804.45	6341.93	6746.85	5314.35	4732.11	5475.65	6294.66	6501.59	5008.68	7824.03	6057.13	6892.57	6080.91	3913.21	6480.05	6469.85
M176T379	176.126	379.113								10396.2	10182.3	18478	11551.6	15238.4	14243.4	13160.1	11550.4	13086.3	6798.54	14619.5	13658.1	15451.5	12759.2	12766.4	13043.8	13034.4
M135T73_2	135.078	73.268								2607.21	36421.7	3857.85	1225.01	1727.96	22639.9	3735.57	3413.9	47513.7	17728.3	1348.77	3949.57	34934.5	25444.4	5839.08	8691.17	21647.9
M279T426	279.043	425.5								18626.6	20828.3	15255	1221.22	21468.7	15370.8	19892.4	18811.4	19753.4	21386.9	21153	19615.3	20322.6	18746.4	17409.3	17840.6	17398.4
M588T98	588.404	98.2175								1809.38	13022.2	3217.15	3111.46	1228.77	1479.17	1170.1	7253.22	3375.04	382.427	4977.2	3344.35	1187.21	8611.75	8613	8530.97	8217.22
M911T488_1	910.908	488.081								4663.39	5077.71	2699.45	5220.98	3914.28	3322.94	6046.34	5309.48	5578.33	5690.64	5045.97	5367.15	3159.76	4787.85	4986.88	5055.1	5215.13
[truncated: 3,059 more rows]

## Sheet: neg
ID	m/z	rt(s)	Name	adduct	HMDB	KEGG	SuperClass	Class	SubClass	model1	model2	model3	model4	model5	model6	model7	GMK1	GMK2	GMK3	GMK4	GMK5	GMK6	QC-1	QC-2	QC-3	QC-4
M469T100	469.33	100.202	11-Keto-.beta.-boswellic acid	(M-H)-						18839.7	21916.3	12402.3	24428.7	18244.4	13724.1	31071.7	20719.5	12246	7456.42	18141.9	20403.1	16951	9964.47	13607.2	12849.3	13611.1
M775T139	774.545	138.574	1-(1z-octadecenyl)-2-(4z,7z,10z,13z,16z,19z-docosahexaenoyl)-sn-glycero-3-phosphoethanolamine	[M-H]-						48890.7	22383.7	163538	26421	139263	10318.3	8049.31	129295	67487	31066.6	52314.7	58417	150711	461729	461826	452461	452724
M729T145	728.559	145.145	1-(1z-octadecenyl)-2-(9z-octadecenoyl)-sn-glycero-3-phosphoethanolamine	[M-H]-	HMDB0011375		Lipids and lipid-like molecules	Glycerophospholipids	Glycerophosphoethanolamines	3677.1	2558.02	10336	1492.99	9801.84	677.309	777.085	9561.9	4444.87	1889.58	4811.16	3819.01	8680.88	40766.7	40773.9	40871.3	35399.9
M125T273	125.035	272.725	1,2,3-benzenetriol	[M-H]-	HMDB0013674	C01108	Benzenoids	Phenols	Benzenetriols and derivatives	7106.42	9160.05	10164.4	8499.93	9227.84	10744.4	9209.2	6939.36	9577.78	6045.38	8937.16	9234.85	8080.73	7230.73	7107.45	7607.84	7105.89
M699T32	699.48	32.333	1,2-dioleoyl-sn-glycero-3-phosphate	[M-H]-	HMDB0007865		Lipids and lipid-like molecules	Glycerophospholipids	Glycerophosphates	7874.12	7087.46	20447.3	8249.6	25329.2	2644.06	2835.15	6148.3	6278.76	4224.58	9229.67	10668.6	16063.3	15992	11491.9	11284.2	11351.9
M771T40	770.571	40.307	1,2-dioleoyl-sn-glycero-3-phosphoethanolamine-n,n-dimethyl	[M-H]-	HMDB0010564		Lipids and lipid-like molecules	Glycerophospholipids	Glycerophosphoethanolamines	13314.3	7206.19	13869.9	12711.6	52473.4	11148.9	5090.26	19944	12979.8	19968.5	15348.8	16509.3	20645	30603.9	27388.8	30572.5	29873.7
M770T37	769.505	36.6785	1,2-dioleoyl-sn-glycero-3-phospho-l-serine	[M-H-NH3]-	HMDB0012390		Lipids and lipid-like molecules	Glycerophospholipids	Glycerophosphoserines	8321.91	7124.37	5459.42	6867.47	7411.42	5958.42	3281.59	10855.6	9804.55	7755.83	15038.8	7865.6	11453.7	9991.77	9988.54	10955.7	10332.3
M721T141	721.484	141.244	1,2-dipalmitoyl-sn-glycero-3-phospho-(1'-rac-glycerol)	[M-H]-			Lipids and lipid-like molecules	Glycerophospholipids	Glycerophosphoglycerols	5252.54	6914.67	9648.48	7321.24	11443.4	3776.02	5281.71	5878.18	8612.18	3965.94	6592.05	7750.62	8731.37	5779.48	5914.63	5776.61	6291.49
M791T141	790.542	140.642	1,2-distearoyl-sn-glycero-3-phospho-l-serine	[M-H]-	HMDB0012378		Lipids and lipid-like molecules	Glycerophospholipids	Glycerophosphoserines	105419	65896.7	144316	76135.1	116326	62662	43972.6	95662.8	109964	111463	97237.3	99381.5	216944	298724	289259	288385	288333
M327T81	327.29	80.883	12-hete-[d8]	[M-H]1-			Lipids and lipid-like molecules	Fatty Acyls	Eicosanoids	5647.12	4061.13	4497.49	4815.41	6691.19	3426.37	3433.02	5746.66	4238.94	3432.13	4028.8	4251.7	4497.18	6149.16	6325.27	6324.44	6324.99
M319T52	319.228	52.178	12(R)-HETE	(M-H)-						89058.4	131731	82978.4	90908.8	78716.6	79831.2	55937.7	95573.7	99280.4	74812.7	49073.5	66931.3	98211.8	121462	121758	133558	125917
M295T46	295.228	45.778	13(S)-HODE	(M-H)-						100310	185165	104345	81926.8	171387	137716	169458	72046	29241.3	59379.5	106539	176199	42139.6	49631.2	56884.1	44923.8	43874.2
M319T37	319.228	36.695	14,15-dihydroxy-5z,8z,11z-eicosatrienoic acid	[M-H-H2O]-			Lipids and lipid-like molecules	Fatty Acyls	Eicosanoids	38595.2	47026.4	23862.8	45948.5	21287.7	56586.1	33928.2	49801.2	43824.1	45362.5	22941	35617.2	41653.7	39624.4	39615	43730.3	39642
M467T112	467.373	111.776	14,17,20,23,26,29-dotriacontahexaenoic acid, (14z,17z,20z,23z,26z,29z)-	[M-H]-			Lipids and lipid-like molecules	Fatty Acyls	Fatty acids and conjugates	9057.63	11264.7	9463.29	14068.3	11105.6	11907.5	37382.5	11729	13895.9	6036.19	9436.83	10485.5	8929.75	8741.21	9036.71	7902.1	8947.87
M317T14	317.081	14.008	1,4-d-xylobiose	[M+Cl]-		C01630	Organic oxygen compounds	Organooxygen compounds	Carbohydrates and carbohydrate conjugates	1101.43	892.905	1031.51	1037.26	1066.23	1043.32	1681.04	879.799	1070.31	1075.7	831.748	1074.3	1155.73	958.15	1100.54	1038.34	1005.04
M163T205	163.061	204.558	1,5-anhydro-d-sorbitol	[M-H]-	HMDB0002712	C07326	Organic oxygen compounds	Organooxygen compounds	Carbohydrates and carbohydrate conjugates	66676.9	64381.3	94156.5	60872.6	93658.6	66612.7	62969.6	108047	101308	102068	72788	99886.8	123533	99496.9	99986.7	99506.8	101442
M365T197	365.233	196.832	15-cyclohexylpentanorprostaglandin f2.alpha.	[M-H]-			Lipids and lipid-like molecules	Fatty Acyls	Eicosanoids	39696.4	20994	32232.9	43010.9	38295	48085.2	32432.7	44629.4	52957.3	36006	34870.3	25626.8	30079.3	27455.3	28902.5	30437.7	30555.3
M348T67	348.185	67.19	(1-(5-fluoropentyl)-1h-indazole-3-carbonyl)-l-valine	[M-H]-			Organic acids and derivatives	Carboxylic acids and derivatives	Amino acids, peptides, and analogues	4190.34	5406.36	2291.39	6825.65	7963.18	8193.5	4907.44	6190.34	4782.52	3858.24	5162.58	3751.98	6588.44	4314.74	4717.03	4715.82	4716.79
M317T50	317.212	50.159	15-hydroxy-5z,8z,11z,13e,17z-eicosapentaenoic acid	[M-H]-			Lipids and lipid-like molecules	Fatty Acyls	Eicosanoids	104344	33997.6	142407	25060.9	22484.9	38989.9	25454.6	23168.9	24895.8	14662.5	13809	21759.3	66385.3	28867.2	28901.5	38675.1	28791.9
M457T240	457.236	240.32	1-(5z,8z,11z,14z-eicosatetraenoyl)-sn-glycero-3-phosphate	[M-H]-			Lipids and lipid-like molecules	Glycerophospholipids	Glycerophosphates	4623.34	9616.32	6106.9	8339.71	8291.67	8262.62	14967.5	5694.45	3536.24	6260.34	6639.41	6346.67	4533.26	4298.67	4298.74	5234	4304.19
M201T450	201.088	450.177	1,6-anhydro-2,3-o-isopropylidene-.beta.-d-mannopyranose	[M-H]-						15700.5	23365.1	27442.1	19651.1	18652.7	24294.8	28627.4	17366.5	21096.2	20606.3	14755.7	28916.9	23510	20123	19527.8	20130.1	19325.2
M271T61_2	271.228	60.6995	16-hydroxyhexadecanoic acid	[M-H]-	HMDB0006294	C18218	Lipids and lipid-like molecules	Fatty Acyls	Fatty acids and conjugates	171256	186465	163330	187853	525527	388669	251668	271619	165851	144103	93538.1	91442.5	257573	257359	257262	267181	257995
M271T92	271.228	92.118	16-Hydroxypalmitic acid	(M-H)-	HMDB0006294	C18218	Lipids and lipid-like molecules	Fatty Acyls	Fatty acids and conjugates	15525.3	15652.8	15957	17471.2	25886	21968.1	26578.7	22911.3	13399.8	12063.2	14699.4	11491.5	20379.5	15638	15639.5	16535	15668.6
M451T34	451.342	33.5765	18.beta.-glycyrrhetinic acid	[M-H-H2O]-			Lipids and lipid-like molecules	Prenol lipids	Triterpenoids	3270.63	6959.06	7960.4	7955.28	6321.18	3692.09	4806.01	5425.39	6836.25	1371.94	5428.85	8054.05	6403.39	5296.94	4956.3	5226.07	5293.73
M476T198	476.278	198.198	1-(9z,12z-octadecadienoyl)-2-hydroxy-sn-glycero-3-phosphoethanolamine	[M]-			Lipids and lipid-like molecules	Fatty Acyls	Lineolic acids and derivatives	311816	302605	209019	296301	287767	326148	243094	188143	157079	317767	417271	364850	252508	174803	171672	179342	165815
M429T35	429.195	35.401	(1-acetyloxy-3-hydroxy-6,8a-dimethyl-7-oxo-3-propan-2-yl-2,3a,4,8-tetrahydro-1h-azulen-4-yl) 4-hydroxybenzoate	[M-H]-			Lipids and lipid-like molecules	Prenol lipids	Sesquiterpenoids	159681	141967	65353.9	446178	83662.7	158448	217143	38802.2	286583	57988.4	196698	78758.8	168595	124088	123810	89897.1	124013
M293T189	293.106	189.391	(1e,4e)-1,5-bis(4-methoxyphenyl)penta-1,4-dien-3-one	[M-H]-			Benzenoids	Phenol ethers	Anisoles	2973.52	3067.98	1073.13	2889.61	1611.84	1772.58	5703.58	800.744	1638.26	4774.4	1575.46	1785.85	4038.06	1143.41	1191.27	1301.85	1143.9
M671T40	671.466	40.1835	1-Hexadecanoyl-2-(9Z,12Z-octadecadienoyl)-sn-glycero-3-phosphoric acid	[M-H]-						9396.44	9017.09	11853.8	9784.24	13479.5	4406.05	4951.9	7596.34	12826.2	3774.45	10022.2	11930.3	8990.99	11653.3	11661.7	10346.5	11638.1
M372T37	372.185	36.712	1h-indole-1-pentanoic acid, 3-[[[1-(aminocarbonyl)-2,2-dimethylpropyl]amino]carbonyl]-	[M-H]-			Organic acids and derivatives	Carboxylic acids and derivatives	Amino acids, peptides, and analogues	2108.64	2583.06	1013.87	609.514	1793.58	2713.75	5161.23	1391.68	1960.03	2015.65	2098.92	1914.38	1907.76	1623.36	1309.78	1559.84	1830.57
M188T106	188.071	105.636	1h-indole-3-propanoic acid	[M-H]-	HMDB0002302		Organoheterocyclic compounds	Indoles and derivatives	Indolyl carboxylic acids and derivatives	37043.4	65390.9	58360.2	67059.6	71628.2	53192.4	79734	41334.9	46977.9	15493.5	63344.1	15360.6	38040.2	23628.3	23632.7	23632.1	25158.4
M296T195	296.1	194.976	1-methylguanosine	[M-H]-			"Nucleosides, nucleotides, and analogues"	Purine nucleosides		4416.85	4570.28	2466.67	6265.53	2759.19	3595.83	4844.5	3569.97	2830.74	3072.06	5450.73	4533.16	3699.35	995.295	1156.97	1213.46	1211.43
M257T171	257.078	170.644	1-Methylpseudouridine	(M-H)-						20451.5	24980	15771.3	25113.1	18137.3	25233	31263.1	17832.1	18421.5	15064.5	24654.4	19529.8	17125.5	12638.5	12974.7	12952.8	12797
M403T33	403.264	32.5035	1-o-(9z-octadecenyl)-sn-glycero-2,3-cyclic-phosphate	[M-H]-						14468.2	7041.44	29132.9	10020.5	54621.4	6632.21	10075.8	11191.6	8684.3	6236.07	19591.9	10618.7	12398	19134.8	19343.5	19136.4	19854.3
M509T169	509.289	168.513	1-oleoyl-2-hydroxy-sn-glycero-3-phospho-(1'-rac-glycerol)	[M-H]-			Lipids and lipid-like molecules	Glycerophospholipids	Glycerophosphoglycerols	26407	35952.7	19706	33266	36743.7	29027.4	25476	31984.7	13103.4	22560.5	26786.8	17260.3	19519.4	19192.2	19209.9	18242.6	18777.4
M435T193	435.251	192.905	1-Oleoyl-L-.alpha.-lysophosphatidic acid	(M-H)-						3324.83	3605.33	2546.42	4013.87	4182.26	3779.7	3342.09	2559.62	5325.07	3599.35	4670.24	4689.01	3456.97	1546.44	1353.43	1546.82	1547.08
M471T193	471.228	192.916	1-o-octyl-2-o-(n-methylcarbamoyl)-sn-glyceryl-3-phosphorylcholine	[M+HCO2]-			Lipids and lipid-like molecules	Glycerophospholipids	Glycerophosphocholines	3505.29	3588.49	1681.1	3606.97	6012.05	2552.88	3888.91	3642.48	3795.74	3817.51	4451.62	3170.58	2983.36	1993.39	1718.99	1832.84	1987.98
M355T237	355.098	236.626	1-o-trans-cinnamoyl-beta-d-glucopyranose	[M+FA-H]-			Phenylpropanoids and polyketides	Cinnamic acids and derivatives	Cinnamic acid esters	1670.46	2270.95	1500.24	2655.39	2420.47	2635.88	3213.15	1115.62	1933.68	2517.49	1732.05	3240.9	2376.13	1750.58	1564.49	1749.34	1688.37
M483T171	483.272	170.986	1-palmitoyl-2-hydroxy-sn-glycero-3-phospho-(1'-rac-glycerol)	[M-H]-			Lipids and lipid-like molecules	Glycerophospholipids	Glycerophosphoglycerols	9751.96	9525.84	4756.07	7096.85	5984.79	8288.31	8681.62	5834.77	3923.19	6725.48	8008.75	4366.36	6229.79	5874.95	5059.77	5297.96	5359.55
M452T199	452.278	199.233	1-palmitoyl-2-hydroxy-sn-glycero-3-phosphoethanolamine	[M-H]-	HMDB0011503		Lipids and lipid-like molecules	Glycerophospholipids	Glycerophosphoethanolamines	303166	307072	288969	296791	272542	329532	227973	213113	363771	320021	405289	250844	326615	211617	208975	213322	213328
M723T141	722.514	140.666	1-palmitoyl-2-lauroyl-sn-glycero-3-phosphorylcholine	[M+HCO2]-			Lipids and lipid-like molecules	Glycerophospholipids	Glycerophosphocholines	40601.6	17186.2	110576	21201.2	105081	7492.8	5287.79	93701.3	58070.4	24198.8	32987.3	47287.2	99510.1	203850	181298	180940	181065
M746T38	745.503	37.71	1-palmitoyl-2-linoleoyl-sn-glycero-3-phospho-(1'-rac-glycerol)	[M-H]-			Lipids and lipid-like molecules	Glycerophospholipids	Glycerophosphoglycerols	10101.9	6131.69	8238.38	8152.17	7157.21	4553.13	4229.98	12835.2	9944.21	8378.01	8821.54	13201.3	18418.1	17348.3	16843.2	18310.8	17884.2
M793T146	792.54	146.015	1-palmitoyl-2-linoleoyl-sn-glycero-3-phosphocholine	[M+Cl]-	HMDB0007973		Lipids and lipid-like molecules	Glycerophospholipids	Glycerophosphocholines	48241.9	44994.8	120710	94657.6	129966	42919.8	60878.8	105064	53201.5	38657.8	52496.5	59437.4	77990.2	109854	94403	102083	94989.2
M748T81	747.518	80.6365	1-palmitoyl-2-oleoyl-phosphatidylglycerol	[M-H]-			Lipids and lipid-like molecules	Glycerophospholipids	Glycerophosphoglycerols	12229.1	5825.49	18838.8	6863.62	18358.3	6122.91	3451.19	18399.4	12222.3	15685.5	7125.51	10294.9	25149.3	38020.7	38665.3	36787.9	39476.8
M743T146	742.541	145.819	1-stearoyl-2-linoleoyl-sn-glycero-3-phosphoethanolamine	[M-H]-	HMDB0008994		Lipids and lipid-like molecules	Glycerophospholipids	Glycerophosphoethanolamines	188121	87816	148065	100714	155360	81651.1	83305.9	121451	126932	108252	117269	192308	272471	238336	243067	235174	225863
M363T185	363.254	185.368	2-[(2e)-3,7-dimethylocta-2,6-dienyl]-3-methoxy-5-(2-phenylethyl)phenol	[M-H]-						5039.8	8737.26	6800.86	7306.53	8534.34	6166.83	10277	5448.76	10399	7608.28	6725.27	5813.19	5892.43	4691.04	5033.51	5245.73	5261.13
M337T49	337.236	49.043	2-(2-hydroxybut-3-en-2-yl)-3a,6,6,9a-tetramethyl-2,4,5,5a,7,8,9,9b-octahydro-1h-benzo[e][1]benzofuran-4,5-diol	[M-H]-						32395.6	16623.3	14491.7	37473.6	54053	87622.1	20114.5	46970.5	30327.9	69288.6	31038.1	33988.5	31089.7	11093.4	28750.7	27178	22599.9
M189T104	188.986	104.367	2,4-dichlorobenzoic acid	[M-H]-		C06670	Benzenoids	Benzene and substituted derivatives	Benzoic acids and derivatives	2607.11	2530.25	1887.5	1915.42	4217.48	1112.38	1546.35	2827.23	2214.46	1546.18	2928.44	1079.63	1299.82	1838.63	1832.19	1840.35	1215.16
M335T201	335.115	201.391	2',4'-dihydroxy-3',6'',6''-trimethylpyrano[2'',3'':6',5']chalcone	[M-H]-			Phenylpropanoids and polyketides	Linear 1,3-diarylpropanoids	Chalcones and dihydrochalcones	13348.4	22682.1	15500.8	25101.7	14506.3	32569.6	31113.8	15690	18579.7	12721.9	16572.3	16614.9	14724.3	9306.16	10018.3	10229.1	10239.1
M213T20	213.056	19.703	2,4-dihydroxybenzophenone	[M-H]-		C14215	Benzenoids	Benzene and substituted derivatives	Benzophenones	9256.86	8992.68	7359.9	8548.6	8040.86	10377.9	11193.5	8757.75	9298.15	7702.97	9045.59	7492.68	10675.9	10074.5	10069.4	10695.9	10073.6
M555T164	555.274	164.495	2,5,7,8-tetramethyl-2-(.beta.-carboxyethyl)-6-hydroxychroman	[2M-H]-			Organoheterocyclic compounds	Benzopyrans	1-benzopyrans	12684.9	11889.4	9285.34	11553.8	11192.3	12507.4	20122.3	12164.1	7557.44	7540.12	8190.22	7337.61	9378.96	7547.35	7442.8	6829.72	7545.25
M220T33_2	220.146	32.861	2,6-di-tert-butyl-4-methoxyphenol	[M-H-CH3]-			Benzenoids	Phenols	Methoxyphenols	16971.5	10997.6	18259.2	15153.3	16429.9	9085.86	13945.6	19347.5	40594.2	7308.62	16432.5	17555.3	18371.2	13236.1	13236.8	12184.8	13233.7
M205T33	205.16	32.906	2,6-di-tert-butylphenol	[M-H]-			Benzenoids	Benzene and substituted derivatives	Phenylpropanes	118850	85254.3	133539	94997.6	124321	81442.4	105237	389155	94927.1	98523.1	137690	93864.4	154351	136683	138901	136615	145156
M747T140	746.514	139.606	(2-aminoethoxy)[2-[docosa-4.7.10.13.16.19-hexaenoyloxy]-3-[hexadec-1-en-1-yloxy]propoxy]phosphinic acid	[M-H]-	HMDB0005780		Lipids and lipid-like molecules	Glycerophospholipids	Glycerophosphoethanolamines	88391.5	36578.2	273631	47372.3	246375	17612	11253.8	204215	135713	56380.4	79531.5	105225	247817	408384	408445	398584	407904
M739T145	738.509	144.588	2-arachidonoyl-1-palmitoyl-sn-glycero-3-phosphoethanolamine	[M-H]-	HMDB0008937		Lipids and lipid-like molecules	Glycerophospholipids	Glycerophosphoethanolamines	42778.7	17412.2	76483.4	19201.8	44396.4	7932.75	7169.5	40468.6	53013.5	30683.6	36019.8	37429.4	125919	127933	128196	126708	126706
M229T73	229.029	73.179	2-bromo-4-sec-butylphenol	[M-H+2i]-			Benzenoids	Benzene and substituted derivatives	Phenylpropanes	1791.62	3115.98	2451.3	4315.15	2798.4	7028.25	1927.94	3658.55	3134.26	5367.46	334.29	3422.46	3004.58	2366.45	2048.01	2057.81	2035.8
M149T52	149.024	52.148	2-carboxybenzaldehyde	[M-H]-		C03057	Benzenoids	Benzene and substituted derivatives	Benzoic acids and derivatives	5049.47	5021.9	2090.65	1578.48	3590.99	4116.23	6437.31	3015.34	2694.3	5389.73	6059.72	3677.37	4569.1	3132.76	3191.44	3056.67	2802.04
M245T84	245.029	84.238	2-chloro-2'-hydroxy-4'-methylbenzophenone	[M-H]-			Benzenoids	Benzene and substituted derivatives	Benzophenones	11135.9	6327.31	2898.23	5403.27	3443.69	7875.22	6017.96	5422.89	7510.5	4950.46	9619.66	7700.92	8617.59	5780.81	5939.11	6183.46	5784.07
M117T145	117.055	145.192	2-hydroxy-3-methylbutyric acid	[M-H]-	HMDB0000407		Lipids and lipid-like molecules	Fatty Acyls	Fatty acids and conjugates	45198.9	72038.3	50723.6	68891.5	56892.6	67578.1	90620.8	51121.6	68386.7	42044	67231.9	68777.3	49550.6	38494.3	39075.4	38491.2	39970.4
M151T50	151.039	50.161	2-Hydroxyphenylacetic acid	[M-H]-	HMDB0000669	C05852	Benzenoids	Benzene and substituted derivatives	Phenylacetic acids	7040.03	3354.91	2751.93	3182.79	5828.49	4904.02	4120.48	3495.72	4017.64	3735	4804.72	7597.36	3678.4	5040.23	4565.13	5617.17	4625.35
M193T388	193.035	388.004	2-keto-d-gluconic acid	[M-H]-		C06473	Organic oxygen compounds	Organooxygen compounds	Carbohydrates and carbohydrate conjugates	4474.76	5727.12	4521.77	6137.85	4848.09	7682.4	6636.41	5934.71	4936.67	5131.85	5181.2	4693.34	5604.61	3701.28	3447.3	3904.54	3507.63
M129T66	129.055	66.339	2-ketohexanoic acid	[M-H]-	HMDB0001864	C00902	Organic acids and derivatives	Keto acids and derivatives	Medium-chain keto acids and derivatives	1.19501e+06	1.41772e+06	844985	1.18101e+06	1.0076e+06	703386	1.52117e+06	1.37912e+06	981780	911597	2.16757e+06	1.27992e+06	1.2755e+06	1.21042e+06	1.21018e+06	1.26841e+06	1.22007e+06
M715T148	714.509	148.378	2-linoleoyl-1-palmitoyl-sn-glycero-3-phosphoethanolamine	[M-H]-	HMDB0008928		Lipids and lipid-like molecules	Glycerophospholipids	Glycerophosphoethanolamines	19924.7	7130.64	23571.3	7842.17	16263.5	3346	3617.63	15033.3	18621.3	12970.3	19503.2	18093.5	47700.7	67666.5	67610.1	62983.3	65895.5
M117T110	117.071	109.934	2-methyl-3-hydroxybutyric acid	[M-H]-	HMDB0000354		Lipids and lipid-like molecules	Fatty Acyls	Fatty acids and conjugates	192929	207277	49969.3	153996	123399	45753.5	215908	52779.3	117664	88870	157004	178100	165494	74916.2	79445	60424.6	79157.6
M194T107	194.049	106.692	2-(n-morpholino)ethanesulfonic acid	[M-H]-			Organoheterocyclic compounds	Oxazinanes	Morpholines	23826.3	20316.5	14542.6	64428.5	13031	12400.3	25484.1	24106.2	18973.7	6980.94	30434.5	16066.2	21821.3	12598.9	13290.3	11632	13296.2
M789T142	788.526	141.702	2-oleoyl-1-stearoyl-sn-glycero-3-phosphoserine	[M-H]-	HMDB0010163		Lipids and lipid-like molecules	Glycerophospholipids	Glycerophosphoserines	36122.2	14278.3	50552.4	18689.9	26174.5	9629.02	6994.22	27305.4	40442	24238	30109.6	29885.5	91045.8	67937.6	67930.9	68509.6	69297.4
M141T122_1	141.016	121.961	2-Oxoadipic acid	(M-H2O-H)-	HMDB0000225	C00322	Organic acids and derivatives	Keto acids and derivatives	Medium-chain keto acids and derivatives	14155.9	35259.8	24043.4	14377.5	9583.1	54626.5	24089.6	16748.6	20230	43013.1	10900	20621.7	18911.5	30559.5	29198.8	40420.7	30107.2
M185T458	184.985	458.123	2-phosphoglycerate	[M-H]-	HMDB0000362	C00197	Organic oxygen compounds	Organooxygen compounds	Carbohydrates and carbohydrate conjugates	5977.86	12963.2	4711.92	9523.19	4305.36	8343.11	9160.06	5580.47	8085.29	3555.44	7320.78	5526.93	4000.46	5308.49	4734.07	4934.44	4742.4
M485T12	485.139	11.883	(2s,3r,4as,12br)-2,3,4a,8-tetrahydroxy-12b-(5-hydroxy-6-methyloxan-2-yl)oxy-3-methyl-2,4-dihydrobenzo[a]anthracene-1,7,12-trione	[M-H]-			Benzenoids	Anthracenes	Anthraquinones	1195.54	1266.87	1287.26	1103.75	1575.19	1918.47	1292.96	1478.24	1257.09	1343.68	1632.06	1467.16	1625.82	1321.57	1288.89	1299.62	1381.69
M258T172	258.056	172.471	2-thiocytidine	[M-H]-						1960.19	674.653	3748.1	3034.1	3982.73	3046.12	2484.01	2112.23	4234.45	1181.18	2408.46	1305.7	973.934	1625.97	1700.05	1669.59	2060.14
M181T347	181.009	347.34	3,4-dihydroxyhydrocinnamic acid	[M-H]-	HMDB0000423	C10447				94404.5	63179.6	95267.1	102508	109783	120785	62440.6	48967.5	59567.1	55966.4	60467.8	52017.8	106018	86985.3	85488.9	90716.7	85534.8
M183T53	183.139	53.27	3,4-dihydroxymandelic acid	[M-H]-	HMDB0001866	C05580	Benzenoids	Phenols	Benzenediols	5038.29	5489.66	4329.48	7889.71	4888.66	9413.91	6655.73	10803.4	8314.01	10399.8	3946.95	4720.34	7242.27	8450.2	8056.08	8817.73	8052.47
M659T446	659.07	445.979	3',5'-cyclic inosine monophosphate	[2M-H]-			Nucleosides, nucleotides, and analogues	Purine nucleotides	Cyclic purine nucleotides	266338	294266	250934	324270	299271	357501	399924	247822	273365	271713	279063	270622	267271	217740	225420	228896	221194
M236T31	236.095	30.684	3-(cyclohexylamino)-2-hydroxy-1-propanesulfonic acid	[M-H]-			Organic nitrogen compounds	Organonitrogen compounds	Cyclohexylamines	9223.39	5086.01	8377.88	7889.42	7314.37	5770.86	9287.14	10333.6	4922.07	7096.31	6122.58	7534.34	5831.42	4842.98	4026.39	4835.41	4775.6
M405T193	405.264	193.083	3-dehydrocholic acid	[M-H]-						3737.69	3920.32	2916.51	6887.79	11253	4605.57	3997.74	3695.66	5137.97	2799.6	3552.04	1694.12	2466.45	2081.89	2501.21	2241.64	2077.14
M161T374	161.045	374.361	3-hydroxy-3-methylglutaric acid	[M-H]-	HMDB0000355	C03761	Lipids and lipid-like molecules	Fatty Acyls	Fatty acids and conjugates	36076.2	26141.4	5454.32	29180.9	9304.24	16838.4	34521.9	13092.7	10801.1	17117	26234.5	22825.3	17209.7	13134.1	12973	13344.6	12804.1
M187T105	187.134	105.444	3-hydroxycapric acid	[M-H]-	HMDB0002203		Organic acids and derivatives	Hydroxy acids and derivatives	Medium-chain hydroxy acids and derivatives	116393	81178.2	42211.5	121570	101884	149676	118499	174471	103655	25108.3	69096.1	58146.4	118399	111467	110497	109729	111451
M215T95	215.165	94.792	3-hydroxydodecanoic acid	[M-H]-	HMDB0000387		Organic acids and derivatives	Hydroxy acids and derivatives	Medium-chain hydroxy acids and derivatives	88220.9	72530.9	38147.3	111222	178372	216821	137852	155055	70166.9	67029.7	54744.4	40103.2	125128	111733	113719	122592	111805
M147T254	147.045	254.337	3-hydroxyglutaric acid	[M-H]-	HMDB0000428		Organic acids and derivatives	Hydroxy acids and derivatives	Beta hydroxy acids and derivatives	25802.8	37180.7	31640.2	34449.3	22425.8	36415.7	42006.6	23309.9	26474	25557.1	36861.9	12782.3	31123.7	28228.9	28232.7	28615.6	28622.2
M99T394	99.0444	393.744	3-Hydroxyisovaleric acid	(M-H2O-H)-	HMDB0000754		Lipids and lipid-like molecules	Fatty Acyls	Fatty acids and conjugates	1649.75	1516.9	1177.88	1506.16	1070.33	1334	1808.01	820.951	1961.39	1613.51	2317.64	989.468	1421.49	900.326	1348.18	904.68	947.099
M206T263	206.046	263.126	3-hydroxykynurenine	[M-H-NH3]-	HMDB0000732	C02794	Organic oxygen compounds	Organooxygen compounds	Carbonyl compounds	1909.38	517.114	1416.05	877.439	2447.38	1088.01	4142.5	2874.79	2856.8	978.641	726.154	1494.65	657.702	742.073	621.793	716.703	742.433
M243T47	243.196	47.382	3-hydroxymyristic acid	[M-H]-	HMDB0061656		Lipids and lipid-like molecules	Fatty Acyls	Fatty acids and conjugates	11949.8	11731.4	11379.9	20662.4	24773.6	104407	26906.6	17061.8	13117.9	6997.08	10631.7	8042.35	20276.3	14928.5	13108.1	15589.3	16039.9
M107T26	107.05	26.21	3-hydroxyphenylacetic acid	[M-H-CO2]-	HMDB0000440	C05593	Benzenoids	Phenols	1-hydroxy-4-unsubstituted benzenoids	271856	259535	197742	68873.9	239300	173384	353915	150307	24571.2	248772	275679	284450	417772	215012	215028	218197	219612
M149T297	149.045	297.253	3-Hydroxypropionic acid (beta-lactic acid)	(M+CH3COO)-	HMDB0000700	C01013	Organic acids and derivatives	Hydroxy acids and derivatives	Beta hydroxy acids and derivatives	10685.4	15101.9	13268.1	17435.7	22442.9	28333	22103.5	14750.5	19124.2	13004.7	14770.3	14554.9	17899.8	10913.5	11546.8	11755.7	11272.3
M188T139	188.075	138.574	3-Indolepropionic acid	(M-H)-						3691.07	5287.63	5238.26	6374.89	5149.8	8594.62	9077.01	4061.56	4733.77	2164.22	4442.32	5280.53	8572.67	3261.37	2492.14	3041.51	3263.28
M245T26	245.012	26.183	3-Methoxy-4-Hydroxyphenylglycol Sulfate	(M-H2O-H)-	HMDB0003332		Benzenoids	Phenols	Methoxyphenols	9970.68	14161.3	5751.93	7466.2	15969.4	18482.8	13435.3	7995.45	12532.3	4046.28	8455.04	6495.81	8167.98	7071.24	6527.31	6610.08	7476.92
M393T203	393.264	203.34	3-methoxylimaprost	[M-H-H2O]-			Lipids and lipid-like molecules	Fatty Acyls	Eicosanoids	6758.66	1442.51	6766.06	1347.49	33875	797.365	905.707	2751.06	25343.3	725.307	6109.26	6398.92	221.33	3491.03	3490.04	4207.92	3625.92
M115T237	115.02	237.167	3-methyl-2-oxobutyric acid	[M-H]-	HMDB0000019	C00141	Organic acids and derivatives	Keto acids and derivatives	Short-chain keto acids and derivatives	42883.1	34126.8	25409.3	38881	16047.2	34372.3	40109.6	25396.9	14163.9	18845.3	45074.2	32125.2	40441.9	20045.7	20750.3	19665.1	18510
M156T204	156.066	203.734	3-methylcrotonylglycine	[M-H]-	HMDB0000459		Organic acids and derivatives	Carboxylic acids and derivatives	Amino acids, peptides, and analogues	5401.55	5789.8	2592.46	3617.22	4604.62	4369.63	6445.57	4656.21	3355.29	3912.3	5241.07	3874.2	4773.58	3558.43	3713.48	3747.78	3759.32
M163T104	163.076	104.326	3-phenylbutyric acid	[M-H]-	HMDB0001955					297046	197186	242889	152760	271411	166340	283354	814407	138145	120208	426035	159397	367585	201739	167087	168478	205229
M258T49	257.937	49.3835	3-quinolinecarboxylic acid, 7,8-dichloro-1,4-dihydro-4-oxo-	[M-H+2i]-			Organoheterocyclic compounds	Quinolines and derivatives	Quinoline carboxylic acids	7946.3	3863.24	4715.69	3434.81	4108.94	7110.03	1711.22	5308.98	5658.67	12069.2	2293.87	4610.3	3666.97	4785.64	4123.42	7371.15	5840.44
M237T197	237.091	197.324	4-(2-hydroxyethyl)piperazine-1-ethanesulfonic acid	[M-H]-	HMDB0062295		Organoheterocyclic compounds	Diazinanes	Piperazines	1273.97	1275.29	1357.44	833.422	725.755	1295.59	1030.6	879.29	1099.04	1019.06	1367.35	1649.86	2173.38	483.904	465.077	483.319	465.859
M129T237	129.036	237.477	4-acetylbutyrate	[M-H]-	HMDB0061881	C02129	Lipids and lipid-like molecules	Fatty Acyls	Fatty acids and conjugates	2784.04	4275.88	1745.37	4348.63	3469.41	5119.17	6885.22	1991.22	2495.54	3411.7	3393.55	5663.04	4172.58	2252.49	2252.19	2252.44	2404.82
[truncated: 4,295 more rows]
