# Supplementary material for: Guominkang formula alleviate inflammation in eosinophilic asthma by regulating immune balance of Th1/2 and Treg/Th17 cells
Source: Front Pharmacol. 2022 Oct 14;13:978421. doi: 10.3389/fphar.2022.978421 (PMC9624229; doi:10.3389/fphar.2022.978421)
Supplement: Supplementary file 5 [file Table4.XLSX]

## Sheet: Sheet1
Cytokine	IL-4(pg/ml）	Control	Model	GMK(H)	GMK(M)	GMK(L)
		1.6	35.62	9.98	13.56	15.99
		4.14	37.98	11.08	14.73	18.2
		4.62	39.22	12.06	16.25	23.53
		4.73	40.51	14.97	18.2	25.89
		4.93	43.21	15.47	25.08	35.06
				16.79
	IFN-γ(pg/ml)	Control	Model	GMK(H)	GMK(M)	GMK(L)
		2.84	2.59	3.92	4.06	3.35
		3.09	2.59	4.21	4.37	3.49
		3.09	2.71	4.52	4.52	3.63
		3.35	2.71	4.68	4.68	3.77
		3.35	2.84	6.47	5.01	3.92
mRNA expression	IL-4	Control	Model	GMK(H)	GMK(M)	GMK(L)
		0.86	1.49	1.09	1.24	1.26
		0.87	1.52	1	1.19	1.21
		1.07	1.83	0.98	1.27	1.24
		0.91	1.52	1.42	1.25	1.23
		1.12	1.47	0.87	1.27	1.33
	IFN-γ	Control	Model	GMK(H)	GMK(M)	GMK(L)
		1.06	0.86	1.92	1.98	1.44
		1.01	0.56	1.78	1.82	1.81
		1.27	0.62	1.94	1.86	1.63
		0.99	0.82	1.84	1.7	1.54
		0.92	0.85	2.03	1.87	1.39
Cell percentange	Th1(%)	Control	Model	GMK(H)	GMK(M)	GMK(L)	DEX
		1	1.1	1.2	0.6	1.3	0.8
		0.9	0.8	1.6	0.9	1.1	0.9
		1.1	0.5	1.3	1.3	1.2	0.5
		1	0.8	1.8	1.2	1.2	0.5
		1.7	0.8	1.4	1.2	1	1.3
		1.7	1.2	1.5	2.3	1.1	1.7
	Th2(%)	Control	Model	GMK(H)	GMK(M)	GMK(L)	DEX
		0.1	1.7	0.2	0.2	0.2	0.1
		0.1	1.7	0.2	0.3	0.4	0.1
		0.1	2.6	0.2	0.1	0.3	0.1
		0.1	9.8	0.4	0.3	0.2	1.3
		0.4	7.3	0.3	0.3	0.2	0.2
		0.2		0.2	0.4	0.2	0
