# Supplementary material for: Guominkang formula alleviate inflammation in eosinophilic asthma by regulating immune balance of Th1/2 and Treg/Th17 cells
Source: Front Pharmacol. 2022 Oct 14;13:978421. doi: 10.3389/fphar.2022.978421 (PMC9624229; doi:10.3389/fphar.2022.978421)
Supplement: Supplementary file 6 [file Table5.XLSX]

## Sheet: Sheet1
Cytokine	IL17A	Control	Model	GMK(H)	GMK(M)	GMK(L)	DEX		IL-6	Control	Model	GMK(H)	GMK(M)	GMK(L)	DEX
		4	18.69	5.44	9.69	7.02	6.21			2.25	48.1	5.09	5.66	8.63	5.66
		5.44	21.4	7.02	6.21	7.87	7.02			3.32	50.62	6.9	7.57	11.9	6.9
		5.44	25.83	7.02	7.02	11.68	8.87			3.55	54.6	10.6	8.63	19.98	13.3
		5.44	25.83	7.87	7.87	12.74	10.07			3.79	63.31	11.9	11.46	34.03	16.97
		5.44	30.73	8.76	8.76	16.17	11.92			4.82	80.34	13.3	15.86	44.51	23.34
	IL-10	Control	Model	GMK(H)	GMK(M)	GMK(L)	DEX		TGF-β	Control	Model	GMK(H)	GMK(M)	GMK(L)	DEX
		1.7	7.71	51.56	21.51	14.33	51.56			119.2	116.3	163.8	141.8	125.6	130.2
		3.81	8.45	30.05	19.32	14.33	41.59			126.7	118.7	150.6	139.8	118.9	125.8
		6.31	10	38.52	17.24	12.52	30.05			138.5	104.2	144.1	148.8	134.2	128.6
		7	11.65	28.74	15.27	10	34.15			125.2	115.6	148.2	134.7	127.5	138.2
		7	8.45	25	14.33	12.71	21.51			127.3	116.8	153.6	131.5	126.3	120.6
Cell percentage	Treg	Control	Model	GMK(H)	GMK(M)	GMK(L)	DEX			Th17	Control	Model	GMK(H)	GMK(M)	GMK(L)	DEX
		10.3	9.8	13.6	12.2	12.7	13.9				0.1	4.6	1.5	0.9	0.2	0.1
		11.7	10.9	14.2	13.7	12	12.4				0.1	3.9	1.6	1.1	3.6	0.1
		11.4	10.9	15.1	12.7	14.1	12.4				0.1	3.2	1.7	1.3	2.9	0.2
		12.3	7.5	13	12.1	10.1	11.5				0.3	5.1	0.8	0.6	0.7	2
		12.6	6.4	13.5	12.9	12.8	13.6				0.2	3.5	0	0.6	1.8	2.4
		13.1	7.7	13	13.8	12.5	12.4				0.1	6.6	0.2	2.3	1	1.1
		13.1	10.5	13.1	13.1	11.2	13
mRNA expression	Foxp3	Control	Model	GMK(H)	GMK(M)	GMK(L)	DEX			RORγt	Control	Model	GMK(H)	GMK(M)	GMK(L)	DEX
		1.0008	0.626	3.2042	1.9264	1.1729	2.7975				1.0011	2.4741	1.3414	1.4129	1.4472	1.3632
		0.9689	0.5893	3.7066	1.9461	1.1339	3.5639				1.0061	2.4341	0.9121	1.345	1.5842	0.9879
		0.9756	0.6147	3.7668	1.9622	1.1174	3.7585				1.04	2.2632	1.6949	1.5121	1.0619	1.0532
		0.9885	0.6051	2.9967	1.9275	1.0999	2.8976				1.0352	2.3185	0.7563	1.2276	1.2324	1.3199
		0.9931	0.5725	3.5808	1.9832	1.0602	3.6168				0.9455	2.0618	1.0795	1.2115	1.6667	1.1123
