# Supplementary material for: Guominkang formula alleviate inflammation in eosinophilic asthma by regulating immune balance of Th1/2 and Treg/Th17 cells
Source: Front Pharmacol. 2022 Oct 14;13:978421. doi: 10.3389/fphar.2022.978421 (PMC9624229; doi:10.3389/fphar.2022.978421)
Supplement: Supplementary file 8 [file Table8.XLSX]

## Sheet: otu_even_table
OTU ID	model1	model2	model3	model4	model5	model6	model7	GMK1	GMK2	GMK3	GMK4	GMK5	GMK6	taxonomy
OTU_212	8	18	2	34	5	0	0	0	0	0	0	2	1	k__Bacteria; p__Proteobacteria; c__Deltaproteobacteria; o__Desulfovibrionales; f__Desulfovibrionaceae; g__uncultured; s__uncultured Desulfovibrionaceae bacterium
OTU_3	140	5	927	117	2022	26	1	9	425	984	256	1226	48	k__Bacteria; p__Bacteroidetes; c__Bacteroidia; o__Bacteroidales; f__Muribaculaceae; g__uncultured bacterium; s__uncultured bacterium
OTU_6	13	40	177	8	20	16	923	391	157	9	88	3	3	k__Bacteria; p__Firmicutes; c__Bacilli; o__Lactobacillales; f__Lactobacillaceae; g__Lactobacillus; s__Lactobacillus reuteri
OTU_141	0	0	9	0	0	0	0	0	0	0	0	1	1	k__Bacteria; p__Firmicutes; c__Clostridia; o__Clostridiales; f__Lachnospiraceae
OTU_37	188	0	367	124	161	217	11	31	135	319	233	65	180	k__Bacteria; p__Bacteroidetes; c__Bacteroidia; o__Bacteroidales; f__Muribaculaceae; g__uncultured bacterium; s__uncultured bacterium
OTU_70	37	0	84	45	79	16	5	2	112	21	113	126	6	k__Bacteria; p__Bacteroidetes; c__Bacteroidia; o__Bacteroidales; f__Rikenellaceae; g__Alistipes; s__Faecalibacterium prausnitzii
OTU_148	42	79	0	6	2	51	0	11	4	19	8	1	2	k__Bacteria; p__Firmicutes; c__Clostridia; o__Clostridiales; f__Lachnospiraceae; g__Lachnoclostridium
OTU_23	0	0	6	0	1	1	0	0	1340	0	0	0	0	k__Bacteria; p__Bacteroidetes; c__Bacteroidia; o__Bacteroidales; f__Muribaculaceae; g__uncultured bacterium; s__uncultured bacterium
OTU_1	10	112	509	6	57	28	2595	3168	382	23	153	0	7	k__Bacteria; p__Firmicutes; c__Bacilli; o__Lactobacillales; f__Lactobacillaceae; g__Lactobacillus; s__Lactobacillus gasseri
OTU_15	0	0	149	0	0	0	0	0	0	174	107	1	1	k__Bacteria; p__Bacteroidetes; c__Bacteroidia; o__Bacteroidales; f__Marinifilaceae; g__Odoribacter; s__uncultured bacterium
OTU_75	249	0	381	64	276	0	43	6	122	306	218	190	158	k__Bacteria; p__Bacteroidetes; c__Bacteroidia; o__Bacteroidales; f__Muribaculaceae; g__uncultured bacterium; s__uncultured bacterium
OTU_118	9	2	11	41	26	4	22	38	90	6	29	37	12	k__Bacteria; p__Bacteroidetes; c__Bacteroidia; o__Bacteroidales; f__Prevotellaceae; g__Prevotellaceae UCG-001; s__uncultured Bacteroidales bacterium
OTU_209	3	0	5	3	2	2	9	10	9	13	1	28	10	k__Bacteria; p__Proteobacteria; c__Gammaproteobacteria; o__Enterobacteriales; f__Enterobacteriaceae; g__Klebsiella; s__Klebsiella pneumoniae
OTU_9	2	15	47	18	28	11	1031	3201	132	14	13	22	3	k__Bacteria; p__Firmicutes; c__Bacilli; o__Lactobacillales; f__Lactobacillaceae; g__Lactobacillus; s__Lactobacillus murinus
OTU_58	127	50	101	19	29	34	87	216	82	10	7	0	0	k__Bacteria; p__Bacteroidetes; c__Bacteroidia; o__Bacteroidales; f__Muribaculaceae; g__uncultured Bacteroidales bacterium; s__uncultured Bacteroidales bacterium
OTU_857	0	0	1	1	0	1	0	0	4	0	1	0	1	k__Bacteria; p__Firmicutes; c__Clostridia; o__Clostridiales; f__Lachnospiraceae
OTU_1078	0	0	21	0	2	0	0	0	18	19	26	38	86	k__Bacteria; p__Bacteroidetes; c__Bacteroidia; o__Bacteroidales; f__Muribaculaceae; g__uncultured bacterium; s__uncultured bacterium
OTU_1277	11	0	26	2	11	16	0	0	7	3	5	9	0	k__Bacteria; p__Bacteroidetes; c__Bacteroidia; o__Bacteroidales; f__Rikenellaceae; g__Alistipes; s__uncultured bacterium
OTU_22	7	32	82	0	22	22	709	1445	133	35	23	22	9	k__Bacteria; p__Patescibacteria; c__Saccharimonadia; o__Saccharimonadales; f__Saccharimonadaceae; g__Candidatus Saccharimonas; s__uncultured bacterium
OTU_65	71	0	158	24	45	83	2	22	196	63	175	85	58	k__Bacteria; p__Bacteroidetes; c__Bacteroidia; o__Bacteroidales; f__Muribaculaceae; g__uncultured bacterium; s__uncultured bacterium
OTU_606	0	0	0	0	0	0	0	0	0	0	1	0	0	k__Bacteria; p__Firmicutes; c__Clostridia; o__Clostridiales; f__Lachnospiraceae; g__Lachnospiraceae NK4A136 group; s__uncultured bacterium
OTU_14	147	16	258	373	138	2023	0	14	150	350	85	317	91	k__Bacteria; p__Bacteroidetes; c__Bacteroidia; o__Bacteroidales; f__Rikenellaceae; g__Alistipes; s__uncultured bacterium
OTU_107	125	1	166	4	0	29	0	0	0	50	0	0	0	k__Bacteria; p__Firmicutes; c__Clostridia; o__Clostridiales; f__Ruminococcaceae; g__Ruminococcaceae UCG-010
OTU_124	3	0	0	0	28	0	8	0	237	0	0	0	0	k__Bacteria; p__Actinobacteria; c__Coriobacteriia; o__Coriobacteriales; f__Atopobiaceae; g__Coriobacteriaceae UCG-002; s__uncultured bacterium
OTU_29	0	0	65	0	0	0	0	0	44	0	1	0	1	k__Bacteria; p__Bacteroidetes; c__Bacteroidia; o__Bacteroidales; f__Muribaculaceae; g__uncultured bacterium; s__uncultured bacterium
OTU_79	182	7	17	19	25	0	41	39	134	33	20	30	1	k__Bacteria; p__Bacteroidetes; c__Bacteroidia; o__Bacteroidales; f__Muribaculaceae; g__uncultured bacterium; s__uncultured bacterium
OTU_131	0	0	7	0	31	2	0	0	14	0	0	0	0	k__Bacteria; p__Actinobacteria; c__Actinobacteria; o__Bifidobacteriales; f__Bifidobacteriaceae; g__Bifidobacterium; s__uncultured bacterium
OTU_43	13	1	171	0	102	6	5	4	17	2	0	1	2	k__Bacteria; p__Firmicutes; c__Clostridia; o__Clostridiales; f__Peptostreptococcaceae; g__Romboutsia; s__uncultured bacterium
OTU_40	57	32	70	355	15	138	0	0	2	71	18	18	10	k__Bacteria; p__Bacteroidetes; c__Bacteroidia; o__Bacteroidales; f__Rikenellaceae; g__Alistipes
OTU_105	32	69	19	37	27	73	6	1	116	34	23	57	27	k__Bacteria; p__Firmicutes; c__Clostridia; o__Clostridiales; f__Ruminococcaceae; g__Ruminiclostridium 9; s__uncultured bacterium
OTU_8	3456	1	2159	1	2469	0	9	288	828	563	5990	1854	758	k__Bacteria; p__Bacteroidetes; c__Bacteroidia; o__Bacteroidales; f__Muribaculaceae; g__uncultured bacterium; s__uncultured bacterium
OTU_59	0	1	1	0	0	0	99	53	1	0	0	0	2	k__Bacteria; p__Bacteroidetes; c__Bacteroidia; o__Bacteroidales; f__Muribaculaceae; g__uncultured bacterium; s__uncultured bacterium
OTU_419	3	0	5	1	2	4	0	0	11	0	0	0	0	k__Bacteria; p__Firmicutes; c__Clostridia; o__Clostridiales; f__Ruminococcaceae
OTU_67	16	575	39	332	19	436	36	13	29	146	58	28	184	k__Bacteria; p__Firmicutes; c__Clostridia; o__Clostridiales; f__Ruminococcaceae
OTU_4	110	9	131	4043	34	13	180	17	344	309	17	775	4438	k__Bacteria; p__Bacteroidetes; c__Bacteroidia; o__Bacteroidales; f__Prevotellaceae; g__Alloprevotella; s__uncultured Bacteroidales bacterium
OTU_1143	0	204	8	0	0	137	17	0	0	15	0	11	15	k__Bacteria; p__Firmicutes; c__Clostridia; o__Clostridiales; f__Ruminococcaceae
OTU_19	8	3387	449	34	169	10	67	13	236	733	1323	872	1432	k__Bacteria; p__Bacteroidetes; c__Bacteroidia; o__Bacteroidales; f__Muribaculaceae; g__uncultured bacterium; s__uncultured bacterium
OTU_41	1	0	131	0	50	0	5	0	51	0	0	0	0	k__Bacteria; p__Firmicutes; c__Erysipelotrichia; o__Erysipelotrichales; f__Erysipelotrichaceae; g__Faecalibaculum; s__uncultured bacterium
OTU_2243	1	117	1	10	4	39	2	3	0	15	4	9	13	k__Bacteria; p__Firmicutes; c__Clostridia; o__Clostridiales; f__Ruminococcaceae
OTU_679	0	22	3	0	0	2	0	0	0	0	0	0	0	k__Bacteria; p__Firmicutes; c__Clostridia; o__Clostridiales; f__Lachnospiraceae
OTU_123	4	190	0	54	1	40	58	0	20	10	2	7	8	k__Bacteria; p__Firmicutes; c__Clostridia; o__Clostridiales; f__Ruminococcaceae; g__Oscillibacter; s__uncultured bacterium
OTU_63	361	405	419	16	58	76	5	17	166	95	15	71	100	k__Bacteria; p__Bacteroidetes; c__Bacteroidia; o__Bacteroidales; f__Muribaculaceae; g__uncultured bacterium; s__uncultured bacterium
OTU_5	185	175	368	746	517	621	1196	157	191	988	349	672	59	k__Bacteria; p__Bacteroidetes; c__Bacteroidia; o__Bacteroidales; f__Bacteroidaceae; g__Bacteroides
OTU_89	18	5	80	114	102	18	2	11	25	72	172	68	28	k__Bacteria; p__Bacteroidetes; c__Bacteroidia; o__Bacteroidales; f__Muribaculaceae; g__uncultured bacterium; s__uncultured bacterium
OTU_34	7	61	5	13	1	88	18	9	0	24	6	0	66	k__Bacteria; p__Firmicutes; c__Clostridia; o__Clostridiales; f__Lachnospiraceae; g__uncultured
OTU_375	0	1	1	0	1	8	0	0	1	0	2	1	4	k__Bacteria; p__Firmicutes; c__Clostridia; o__Clostridiales; f__Ruminococcaceae; g__GCA-900066225
OTU_158	0	2	7	38	12	8	0	0	2	0	0	1	1	k__Bacteria; p__Proteobacteria; c__Deltaproteobacteria; o__Desulfovibrionales; f__Desulfovibrionaceae; g__Bilophila; s__uncultured bacterium
OTU_84	10	113	10	339	5	46	137	34	7	69	4	38	39	k__Bacteria; p__Firmicutes; c__Clostridia; o__Clostridiales; f__Lachnospiraceae; g__Lachnoclostridium; s__uncultured bacterium
OTU_72	92	680	229	12	127	48	11	35	35	15	58	16	1	k__Bacteria; p__Bacteroidetes; c__Bacteroidia; o__Bacteroidales; f__Muribaculaceae
OTU_16	112	947	303	107	22	11	0	89	154	137	239	14	26	k__Bacteria; p__Bacteroidetes; c__Bacteroidia; o__Bacteroidales; f__Muribaculaceae; g__uncultured bacterium; s__uncultured bacterium
OTU_1347	0	1	0	0	0	3	0	0	0	1	0	0	0	k__Bacteria; p__Firmicutes; c__Clostridia; o__Clostridiales
OTU_2684	0	27	1	0	1	41	53	1	0	7	15	59	35	k__Bacteria; p__Firmicutes; c__Clostridia; o__Clostridiales; f__Ruminococcaceae; g__Ruminiclostridium 9; s__uncultured bacterium
OTU_609	0	9	22	1	1	14	3	4	0	1	0	1	10	k__Bacteria; p__Firmicutes; c__Clostridia; o__Clostridiales; f__Lachnospiraceae; g__Lachnospiraceae NK4A136 group; s__uncultured bacterium
OTU_1983	0	0	4	0	1	4	0	0	0	1	0	0	0	k__Bacteria; p__Bacteroidetes; c__Bacteroidia; o__Bacteroidales
OTU_269	1	1	0	0	1	1	0	0	0	0	0	0	0	k__Bacteria; p__Firmicutes; c__Clostridia; o__Clostridiales; f__Ruminococcaceae; g__Ruminiclostridium 6; s__uncultured bacterium
OTU_28	0	1	11	3	0	0	24	3	9	2	0	0	1	k__Bacteria; p__Firmicutes; c__Bacilli; o__Lactobacillales; f__Lactobacillaceae; g__Lactobacillus
OTU_88	68	163	91	1	9	19	41	3	51	31	15	29	25	k__Bacteria; p__Bacteroidetes; c__Bacteroidia; o__Bacteroidales; f__Muribaculaceae
OTU_149	0	0	2	0	0	0	0	5	4	2	0	0	3	k__Bacteria; p__Firmicutes; c__Clostridia; o__Clostridiales; f__Ruminococcaceae
OTU_76	3	41	8	0	3	58	2	13	97	47	1	1	4	k__Bacteria; p__Firmicutes; c__Clostridia; o__Clostridiales; f__Lachnospiraceae; g__Lachnospiraceae NK4A136 group
OTU_384	0	0	0	0	0	0	0	0	153	0	1	0	1	k__Bacteria; p__Bacteroidetes; c__Bacteroidia; o__Bacteroidales; f__Muribaculaceae; g__uncultured bacterium; s__uncultured bacterium
OTU_1641	0	0	1	0	0	0	0	0	3	0	0	0	0	k__Bacteria; p__Bacteroidetes; c__Bacteroidia; o__Bacteroidales
OTU_95	0	199	7	54	3	61	65	8	1	71	6	5	98	k__Bacteria; p__Firmicutes; c__Clostridia; o__Clostridiales; f__Ruminococcaceae; g__Oscillibacter; s__unidentified
OTU_210	8	10	11	3	1	1	2	1	1	2	4	14	23	k__Bacteria; p__Proteobacteria; c__Gammaproteobacteria; o__Pseudomonadales; f__Pseudomonadaceae; g__Pseudomonas; s__Pseudomonas fluorescens
OTU_987	0	0	0	1	0	0	0	0	0	0	0	0	0	k__Bacteria; p__Firmicutes; c__Clostridia; o__Clostridiales; f__Lachnospiraceae
OTU_285	0	7	0	0	0	15	0	2	0	0	0	0	1	k__Bacteria; p__Firmicutes; c__Clostridia; o__Clostridiales; f__Ruminococcaceae; g__UBA1819; s__uncultured bacterium
OTU_1541	0	1	0	0	1	0	8	17	5	5	0	0	0	k__Bacteria; p__Bacteroidetes; c__Bacteroidia; o__Bacteroidales; f__Muribaculaceae; g__uncultured Bacteroidales bacterium; s__uncultured Bacteroidales bacterium
OTU_53	59	30	1	162	4	28	146	1	22	8	3	2	20	k__Bacteria; p__Firmicutes; c__Clostridia; o__Clostridiales; f__Lachnospiraceae
OTU_73	0	0	0	0	0	0	0	1	178	80	151	23	17	k__Bacteria; p__Bacteroidetes; c__Bacteroidia; o__Bacteroidales; f__Marinifilaceae; g__Odoribacter; s__uncultured bacterium
OTU_543	6	7	0	1	1	0	0	0	2	0	0	0	4	k__Bacteria; p__Bacteroidetes; c__Bacteroidia; o__Bacteroidales; f__Prevotellaceae; g__Prevotella; s__Chlamydia trachomatis
OTU_197	2	3	22	1	3	14	0	27	1	2	2	1	3	k__Bacteria; p__Firmicutes; c__Clostridia; o__Clostridiales; f__Lachnospiraceae; g__[Eubacterium] xylanophilum group; s__uncultured bacterium
OTU_152	1	1	1	0	0	21	6	5	0	0	0	0	2	k__Bacteria; p__Firmicutes; c__Clostridia; o__Clostridiales; f__Lachnospiraceae
OTU_31	169	61	170	44	216	70	116	306	279	110	53	120	6	k__Bacteria; p__Bacteroidetes; c__Bacteroidia; o__Bacteroidales; f__Muribaculaceae; g__uncultured bacterium; s__uncultured bacterium
OTU_98	11	48	3	110	9	37	27	2	40	35	8	3	9	k__Bacteria; p__Firmicutes; c__Clostridia; o__Clostridiales; f__Peptococcaceae; g__uncultured; s__uncultured bacterium
OTU_154	33	24	20	0	9	9	0	1	18	87	15	17	0	k__Bacteria; p__Bacteroidetes; c__Bacteroidia; o__Bacteroidales; f__Muribaculaceae; g__uncultured bacterium; s__uncultured bacterium
OTU_910	1	0	5	0	3	5	0	3	34	15	1	74	1	k__Bacteria; p__Firmicutes; c__Clostridia; o__Clostridiales; f__Ruminococcaceae; g__Ruminiclostridium 9; s__uncultured bacterium
OTU_2	886	230	324	2465	696	1290	13	18	29	2275	738	437	77	k__Bacteria; p__Bacteroidetes; c__Bacteroidia; o__Bacteroidales; f__Bacteroidaceae; g__Bacteroides; s__Bacteroides acidifaciens
OTU_51	0	36	115	32	846	9	1	23	0	1	52	16	35	k__Bacteria; p__Firmicutes; c__Erysipelotrichia; o__Erysipelotrichales; f__Erysipelotrichaceae; g__uncultured; s__uncultured bacterium
OTU_161	20	1	16	0	28	13	0	1	37	3	0	1	1	k__Bacteria; p__Firmicutes; c__Clostridia; o__Clostridiales; f__Ruminococcaceae; g__Ruminococcaceae UCG-010
OTU_253	0	0	3	1	0	4	24	2	0	0	0	0	0	k__Bacteria; p__Bacteroidetes; c__Bacteroidia; o__Bacteroidales; f__Prevotellaceae
OTU_1444	30	7	1	0	1	0	0	0	2	0	0	4	0	k__Bacteria; p__Bacteroidetes; c__Bacteroidia; o__Bacteroidales; f__Muribaculaceae; g__uncultured bacterium; s__uncultured bacterium
OTU_135	30	63	3	3	5	22	2	1	66	2	0	0	0	k__Bacteria; p__Firmicutes; c__Clostridia; o__Clostridiales; f__Lachnospiraceae
OTU_153	0	24	23	0	1	26	40	62	0	0	0	0	2	k__Bacteria; p__Firmicutes; c__Clostridia; o__Clostridiales; f__Lachnospiraceae; g__Lachnospiraceae NK4A136 group; s__uncultured bacterium
OTU_42	0	9	9	0	0	0	0	2	0	0	0	0	1	k__Bacteria; p__Firmicutes; c__Clostridia; o__Clostridiales; f__Lachnospiraceae
OTU_54	8	29	24	24	3	1	14	98	81	14	10	14	2	k__Bacteria; p__Actinobacteria; c__Coriobacteriia; o__Coriobacteriales; f__Eggerthellaceae; g__Enterorhabdus; s__uncultured bacterium
OTU_477	1	0	6	0	0	0	123	2	0	0	0	1	1	k__Bacteria; p__Firmicutes; c__Clostridia; o__Clostridiales; f__Lachnospiraceae
OTU_159	46	0	9	61	13	32	0	1	3	6	8	1	10	k__Bacteria; p__Bacteroidetes; c__Bacteroidia; o__Bacteroidales; f__Rikenellaceae; g__Alistipes; s__uncultured bacterium
OTU_122	0	3	1	143	1	29	3	4	33	23	0	1	11	k__Bacteria; p__Firmicutes; c__Clostridia; o__Clostridiales; f__Lachnospiraceae
OTU_222	0	25	0	2	1	40	0	1	2	16	9	9	23	k__Bacteria; p__Firmicutes; c__Clostridia; o__Clostridiales; f__Ruminococcaceae; g__Ruminococcaceae UCG-004; s__uncultured bacterium
OTU_200	0	0	3	0	0	0	0	0	0	0	0	0	0	k__Bacteria; p__Bacteroidetes; c__Bacteroidia; o__Bacteroidales; f__Muribaculaceae; g__mouse gut metagenome; s__mouse gut metagenome
OTU_185	0	3	2	0	0	3	0	3	1	3	0	0	0	k__Bacteria; p__Firmicutes; c__Clostridia; o__Clostridiales; f__Lachnospiraceae
OTU_1957	0	25	7	0	14	20	71	1	2	0	2	0	6	k__Bacteria; p__Firmicutes; c__Clostridia; o__Clostridiales; f__Ruminococcaceae; g__Ruminiclostridium 5
OTU_1653	1	4	2	4	5	9	2	2	11	3	1	2	5	k__Bacteria; p__Firmicutes; c__Clostridia; o__Clostridiales; f__Ruminococcaceae
OTU_164	5	4	1	1	0	2	6	0	1	0	3	1	3	k__Bacteria; p__Actinobacteria; c__Actinobacteria; o__Bifidobacteriales; f__Bifidobacteriaceae; g__Bifidobacterium; s__unidentified
OTU_44	9	288	27	45	33	47	0	0	3	127	1	31	48	k__Bacteria; p__Epsilonbacteraeota; c__Campylobacteria; o__Campylobacterales; f__Helicobacteraceae; g__Helicobacter; s__uncultured bacterium
OTU_47	62	0	46	283	72	47	143	80	18	92	48	34	84	k__Bacteria; p__Bacteroidetes; c__Bacteroidia; o__Bacteroidales; f__Bacteroidaceae; g__Bacteroides; s__Bacteroides caecimuris
OTU_380	0	0	0	0	0	0	0	1	0	0	0	0	0	k__Bacteria; p__Actinobacteria; c__Coriobacteriia; o__Coriobacteriales; f__Atopobiaceae; g__Coriobacteriaceae UCG-002; s__uncultured bacterium
OTU_1412	0	0	0	0	0	0	0	0	1	0	0	0	0	k__Bacteria; p__Firmicutes; c__Bacilli; o__Bacillales; f__Staphylococcaceae; g__Jeotgalicoccus; s__uncultured bacterium
OTU_183	0	0	9	0	0	0	0	0	2	0	0	0	0	k__Bacteria; p__Bacteroidetes; c__Bacteroidia; o__Bacteroidales; f__Marinifilaceae; g__Butyricimonas; s__uncultured organism
OTU_112	12	0	6	0	0	0	0	0	361	0	0	0	3	k__Bacteria; p__Tenericutes; c__Mollicutes; o__Anaeroplasmatales; f__Anaeroplasmataceae; g__Anaeroplasma; s__uncultured bacterium
OTU_121	21	8	4	6	5	13	8	3	5	5	9	18	19	k__Bacteria; p__Actinobacteria; c__Actinobacteria; o__Bifidobacteriales; f__Bifidobacteriaceae; g__Bifidobacterium; s__Bifidobacterium breve
OTU_303	0	9	5	0	5	4	1	0	2	1	4	0	0	k__Bacteria; p__Firmicutes; c__Clostridia; o__Clostridiales; f__Peptococcaceae; g__uncultured; s__uncultured bacterium
OTU_793	0	26	9	78	57	12	1	5	0	3	10	76	21	k__Bacteria; p__Firmicutes; c__Clostridia; o__Clostridiales; f__Ruminococcaceae
OTU_274	0	19	12	5	5	6	6	0	0	3	1	1	1	k__Bacteria; p__Firmicutes; c__Clostridia; o__Clostridiales; f__Clostridiales vadinBB60 group; g__uncultured bacterium; s__uncultured bacterium
OTU_612	2	0	0	0	4	0	0	0	1	0	0	0	0	k__Bacteria; p__Bacteroidetes; c__Bacteroidia; o__Bacteroidales; f__Muribaculaceae; g__uncultured bacterium; s__uncultured bacterium
OTU_108	2	1	7	0	45	31	106	18	7	14	12	1	7	k__Bacteria; p__Firmicutes; c__Clostridia; o__Clostridiales; f__Lachnospiraceae; g__Lachnospiraceae NK4A136 group
OTU_282	0	5	3	0	0	3	0	15	0	0	0	0	0	k__Bacteria; p__Firmicutes; c__Clostridia; o__Clostridiales; f__Lachnospiraceae
OTU_664	0	0	1	0	0	1	0	1	1	0	1	0	0	k__Bacteria; p__Firmicutes; c__Clostridia; o__Clostridiales; f__Peptococcaceae; g__uncultured
OTU_56	4	0	0	0	1	0	0	0	198	0	0	0	0	k__Bacteria; p__Firmicutes; c__Clostridia; o__Clostridiales; f__Ruminococcaceae
OTU_17	244	57	207	423	22	613	3	0	80	356	115	194	644	k__Bacteria; p__Bacteroidetes; c__Bacteroidia; o__Bacteroidales; f__Rikenellaceae; g__Alistipes; s__uncultured bacterium
OTU_594	0	27	0	16	2	20	0	0	3	11	7	14	19	k__Bacteria; p__Firmicutes; c__Clostridia; o__Clostridiales; f__Ruminococcaceae; g__Oscillibacter; s__uncultured bacterium
OTU_32	686	80	486	100	420	27	120	107	268	99	241	238	189	k__Bacteria; p__Bacteroidetes; c__Bacteroidia; o__Bacteroidales; f__Muribaculaceae
OTU_2894	0	0	0	0	0	0	0	0	0	0	0	0	0	k__Bacteria; p__Bacteroidetes; c__Bacteroidia; o__Bacteroidales; f__Muribaculaceae; g__uncultured bacterium; s__uncultured bacterium
OTU_234	0	0	10	0	21	0	0	0	7	3	7	27	7	k__Bacteria; p__Bacteroidetes; c__Bacteroidia; o__Bacteroidales; f__Rikenellaceae; g__Alistipes; s__Alistipes indistinctus YIT 12060
OTU_339	0	0	0	0	0	0	0	0	3	3	22	0	0	k__Bacteria; p__Bacteroidetes; c__Bacteroidia; o__Bacteroidales; f__Rikenellaceae; g__Alistipes
OTU_271	0	9	3	0	2	97	0	0	0	1	2	0	0	k__Bacteria; p__Firmicutes; c__Clostridia; o__Clostridiales; f__Clostridiales vadinBB60 group; g__uncultured bacterium; s__uncultured bacterium
OTU_2787	0	0	0	0	0	0	0	0	0	0	0	0	0	k__Bacteria; p__Firmicutes; c__Clostridia; o__Clostridiales; f__Lachnospiraceae
OTU_638	0	0	1	0	0	0	0	2	9	0	0	0	0	k__Bacteria; p__Actinobacteria; c__Actinobacteria; o__Corynebacteriales; f__Corynebacteriaceae; g__Corynebacterium 1; s__Corynebacterium glutamicum
OTU_106	0	0	0	1	1	11	0	0	1	1	6	14	16	k__Bacteria; p__Bacteroidetes; c__Bacteroidia; o__Bacteroidales; f__Prevotellaceae; g__Prevotella 9; s__uncultured bacterium
OTU_103	0	0	0	0	0	0	0	22	14	0	1	0	0	k__Bacteria; p__Firmicutes; c__Erysipelotrichia; o__Erysipelotrichales; f__Erysipelotrichaceae; g__Turicibacter; s__uncultured bacterium
OTU_176	1	0	6	0	18	0	0	13	3	17	3	29	2	k__Bacteria; p__Firmicutes; c__Clostridia; o__Clostridiales; f__Ruminococcaceae; g__Ruminococcaceae UCG-013
OTU_100	5	0	54	0	23	0	1	1	59	0	0	0	0	k__Bacteria; p__Firmicutes; c__Clostridia; o__Clostridiales; f__Clostridiaceae 1; g__Clostridium sensu stricto 1; s__uncultured bacterium
OTU_416	1	1	0	0	0	0	0	0	3	5	0	5	5	k__Bacteria; p__Epsilonbacteraeota; c__Campylobacteria; o__Campylobacterales; f__Campylobacteraceae; g__Campylobacter; s__Campylobacter ureolyticus ACS-301-V-Sch3b
OTU_2662	0	0	0	0	0	0	0	0	0	0	0	0	0	k__Bacteria; p__Bacteroidetes; c__Bacteroidia; o__Bacteroidales; f__Muribaculaceae
OTU_146	5	4	0	0	0	0	0	1	1	1	1	0	4	k__Bacteria; p__Bacteroidetes; c__Bacteroidia; o__Bacteroidales; f__Bacteroidaceae; g__Bacteroides; s__human gut metagenome
OTU_143	3	71	4	321	16	26	4	3	14	46	6	5	14	k__Bacteria; p__Firmicutes; c__Clostridia; o__Clostridiales; f__Ruminococcaceae; g__Oscillibacter; s__uncultured bacterium
OTU_900	3	288	2	6	3	51	5	2	33	36	2	38	33	k__Bacteria; p__Firmicutes; c__Clostridia; o__Clostridiales; f__Ruminococcaceae; g__Ruminiclostridium; s__uncultured bacterium
OTU_449	0	0	0	0	0	6	1	0	0	0	0	0	1	k__Bacteria; p__Firmicutes; c__Clostridia; o__Clostridiales; f__Family XIII; g__Anaerovorax; s__uncultured bacterium
OTU_52	25	243	606	9	1120	20	109	63	6	3	115	12	1	k__Bacteria; p__Bacteroidetes; c__Bacteroidia; o__Bacteroidales; f__Muribaculaceae; g__uncultured bacterium; s__uncultured bacterium
OTU_2039	0	0	2	0	0	0	0	0	0	0	0	0	0	k__Bacteria; p__Bacteroidetes; c__Bacteroidia; o__Bacteroidales; f__Muribaculaceae; g__uncultured bacterium; s__uncultured bacterium
OTU_13	8	0	191	100	71	148	53	43	741	1136	462	1406	973	k__Bacteria; p__Bacteroidetes; c__Bacteroidia; o__Bacteroidales; f__Rikenellaceae; g__Rikenellaceae RC9 gut group; s__uncultured bacterium
OTU_386	1	0	8	0	2	2	0	8	0	6	3	6	0	k__Bacteria; p__Bacteroidetes; c__Bacteroidia; o__Bacteroidales; f__Muribaculaceae; g__uncultured bacterium; s__uncultured bacterium
OTU_165	3	4	20	0	11	9	5	7	8	8	5	17	8	k__Bacteria; p__Actinobacteria; c__Actinobacteria; o__Corynebacteriales; f__Corynebacteriaceae; g__Corynebacterium 1; s__uncultured Corynebacterium sp.
OTU_201	0	0	1	0	0	4	0	0	0	0	0	0	0	k__Bacteria; p__Firmicutes; c__Clostridia; o__Clostridiales; f__Lachnospiraceae; g__uncultured; s__uncultured bacterium
OTU_139	7	122	8	56	2	73	27	2	53	10	7	19	21	k__Bacteria; p__Firmicutes; c__Clostridia; o__Clostridiales; f__Ruminococcaceae
OTU_408	0	0	2	0	0	0	0	6	0	2	0	2	0	k__Bacteria; p__Firmicutes; c__Clostridia; o__Clostridiales; f__Lachnospiraceae
OTU_1566	0	0	0	0	0	0	0	0	2	0	0	0	0	k__Bacteria; p__Bacteroidetes; c__Bacteroidia; o__Bacteroidales; f__Muribaculaceae; g__uncultured bacterium; s__uncultured bacterium
OTU_214	0	0	12	0	4	37	0	8	0	1	2	1	0	k__Bacteria; p__Firmicutes; c__Clostridia; o__Clostridiales; f__Lachnospiraceae; g__Lachnospiraceae NK4A136 group; s__Lachnospiraceae bacterium COE1
OTU_898	0	4	1	0	1	0	0	0	5	4	0	1	1	k__Bacteria; p__Bacteroidetes; c__Bacteroidia; o__Bacteroidales; f__Muribaculaceae; g__uncultured bacterium; s__uncultured bacterium
OTU_191	0	0	0	6	0	0	0	0	117	3	0	0	22	k__Bacteria; p__Proteobacteria; c__Alphaproteobacteria; o__Rhodospirillales; f__uncultured; g__gut metagenome; s__gut metagenome
OTU_1785	6	0	6	0	5	4	0	0	6	3	6	3	2	k__Bacteria; p__Bacteroidetes; c__Bacteroidia; o__Bacteroidales; f__Muribaculaceae; g__uncultured bacterium; s__uncultured bacterium
OTU_20	2	6	0	5	2	2	109	70	3	0	0	0	0	k__Bacteria; p__Bacteroidetes; c__Bacteroidia; o__Flavobacteriales; f__Flavobacteriaceae; g__Flavobacterium
OTU_64	0	0	29	0	1	365	0	0	0	16	1	0	119	k__Bacteria; p__Firmicutes; c__Clostridia; o__Clostridiales; f__Ruminococcaceae; g__Ruminiclostridium; s__uncultured bacterium
OTU_203	16	33	27	0	4	11	10	246	25	7	0	5	11	k__Bacteria; p__Firmicutes; c__Clostridia; o__Clostridiales; f__Ruminococcaceae; g__Ruminococcaceae UCG-014
OTU_265	1	9	4	3	0	8	19	0	0	0	1	0	5	k__Bacteria; p__Firmicutes; c__Clostridia; o__Clostridiales; f__Lachnospiraceae; g__uncultured; s__Clostridium sp. Culture-54
OTU_660	1	30	5	9	1	11	21	7	4	8	2	3	9	k__Bacteria; p__Firmicutes; c__Clostridia; o__Clostridiales; f__Lachnospiraceae; g__GCA-900066575; s__uncultured bacterium
OTU_584	2	0	7	0	4	0	0	0	11	0	0	0	0	k__Bacteria; p__Firmicutes; c__Clostridia; o__Clostridiales; f__Ruminococcaceae; g__Ruminiclostridium 1
OTU_151	0	0	5	0	0	0	4	5	8	1	0	1	0	k__Bacteria; p__Actinobacteria; c__Coriobacteriia; o__Coriobacteriales; f__Eggerthellaceae; g__Enterorhabdus; s__uncultured bacterium
OTU_110	9	25	23	4	8	25	6	5	27	4	4	8	10	k__Bacteria; p__Firmicutes; c__Clostridia; o__Clostridiales; f__Ruminococcaceae; g__Ruminococcaceae NK4A214 group; s__uncultured bacterium
OTU_21	133	109	75	52	48	182	13	6	53	312	126	121	143	k__Bacteria; p__Bacteroidetes; c__Bacteroidia; o__Bacteroidales; f__Muribaculaceae; g__uncultured bacterium; s__uncultured bacterium
OTU_2119	0	0	0	0	0	1	0	0	1	134	0	16	2	k__Bacteria; p__Firmicutes; c__Clostridia; o__Clostridiales; f__Ruminococcaceae
OTU_888	0	0	11	2	4	4	0	0	2	0	1	2	0	k__Bacteria; p__Firmicutes; c__Clostridia; o__Clostridiales; f__Clostridiales vadinBB60 group; g__uncultured bacterium; s__uncultured bacterium
OTU_2694	0	0	0	0	0	0	0	0	0	0	0	0	1	k__Bacteria; p__Bacteroidetes; c__Bacteroidia; o__Bacteroidales
OTU_18	0	0	0	3	0	2	24	35	2	2	0	4	0	k__Bacteria; p__Proteobacteria; c__Alphaproteobacteria; o__Azospirillales; f__Azospirillaceae; g__Azospirillum
OTU_188	9	0	0	0	0	0	1	0	0	1	0	0	0	k__Bacteria; p__Bacteroidetes; c__Bacteroidia; o__Bacteroidales; f__Rikenellaceae; g__Alistipes; s__uncultured bacterium
OTU_487	0	0	0	0	0	0	0	0	0	0	0	0	0	k__Bacteria; p__Bacteroidetes; c__Bacteroidia; o__Bacteroidales; f__Muribaculaceae; g__uncultured bacterium; s__uncultured bacterium
OTU_74	36	82	6	268	20	113	23	8	1	30	5	0	4	k__Bacteria; p__Firmicutes; c__Clostridia; o__Clostridiales; f__Lachnospiraceae
OTU_55	0	256	5	2	1	902	97	4	1	234	7	13	89	k__Bacteria; p__Firmicutes; c__Clostridia; o__Clostridiales; f__Ruminococcaceae; g__Intestinimonas; s__uncultured bacterium
OTU_109	0	2	1	2	0	2	12	126	5	0	0	1	0	k__Bacteria; p__Actinobacteria; c__Coriobacteriia; o__Coriobacteriales; f__Eggerthellaceae; g__Enterorhabdus; s__uncultured bacterium
OTU_2079	0	0	0	0	0	2	0	0	0	0	0	0	0	k__Bacteria; p__Firmicutes; c__Clostridia; o__Clostridiales; f__Lachnospiraceae
OTU_243	0	24	8	0	0	4	0	0	0	0	0	0	0	k__Bacteria; p__Firmicutes; c__Clostridia; o__Clostridiales; f__Lachnospiraceae; g__Lachnospiraceae NK4A136 group
OTU_883	0	0	0	0	1	0	0	0	0	0	0	0	0	k__Bacteria; p__Firmicutes; c__Clostridia; o__Clostridiales; f__Lachnospiraceae
OTU_33	55	5	231	185	468	194	319	202	43	359	261	198	155	k__Bacteria; p__Bacteroidetes; c__Bacteroidia; o__Bacteroidales; f__Muribaculaceae
OTU_12	1	1	0	2	0	2	162	104	6	1	0	1	0	k__Bacteria; p__Proteobacteria; c__Gammaproteobacteria; o__Betaproteobacteriales; f__Burkholderiaceae; g__Aquabacterium
OTU_816	0	0	4	0	0	0	0	0	5	8	5	12	2	k__Bacteria; p__Bacteroidetes; c__Bacteroidia; o__Bacteroidales; f__Muribaculaceae; g__uncultured bacterium; s__uncultured bacterium
OTU_220	0	22	2	0	0	19	18	0	0	1	0	0	2	k__Bacteria; p__Firmicutes; c__Clostridia; o__Clostridiales; f__Lachnospiraceae; g__GCA-900066575; s__uncultured bacterium
OTU_1370	1	1	1	0	0	0	0	0	0	0	0	1	1	k__Bacteria; p__Firmicutes; c__Negativicutes; o__Selenomonadales; f__Veillonellaceae; g__Negativicoccus; s__uncultured bacterium
OTU_10	1	19	5	3	1	5	102	822	2	14	5	0	1	k__Bacteria; p__Firmicutes; c__Clostridia; o__Clostridiales; f__Clostridiaceae 1; g__Candidatus Arthromitus; s__uncultured bacterium
OTU_628	0	0	0	0	2	0	0	0	0	0	0	0	0	k__Bacteria; p__Bacteroidetes; c__Bacteroidia; o__Bacteroidales; f__Rikenellaceae; g__Alistipes; s__gut metagenome
OTU_2351	0	0	1	0	1	0	0	0	0	0	1	0	1	k__Bacteria; p__Bacteroidetes; c__Bacteroidia; o__Bacteroidales; f__Muribaculaceae; g__uncultured bacterium; s__uncultured bacterium
OTU_1951	30	7	23	2	1	12	0	0	2	3	0	13	9	k__Bacteria; p__Bacteroidetes; c__Bacteroidia; o__Bacteroidales
OTU_50	2	345	27	4	5	123	18	1	13	356	11	16	89	k__Bacteria; p__Firmicutes; c__Clostridia; o__Clostridiales; f__Ruminococcaceae; g__Ruminiclostridium; s__uncultured bacterium
OTU_102	13	1	18	179	25	2	1	2	20	67	8	100	12	k__Bacteria; p__Firmicutes; c__Clostridia; o__Clostridiales; f__Family XIII; g__[Eubacterium] nodatum group; s__uncultured bacterium
OTU_757	11	19	7	51	5	13	5	29	0	1	10	7	0	k__Bacteria; p__Firmicutes; c__Clostridia; o__Clostridiales; f__Lachnospiraceae; g__Lachnospiraceae NK4A136 group; s__uncultured bacterium
OTU_2626	0	2	2	0	0	0	1	0	0	3	11	14	19	k__Bacteria; p__Bacteroidetes; c__Bacteroidia; o__Bacteroidales; f__Muribaculaceae; g__uncultured bacterium; s__uncultured bacterium
OTU_1486	5	0	9	1	11	0	0	0	3	14	2	2	1	k__Bacteria; p__Bacteroidetes; c__Bacteroidia; o__Bacteroidales; f__Muribaculaceae; g__uncultured bacterium; s__uncultured bacterium
OTU_489	0	1	1	0	0	21	0	0	0	0	2	0	4	k__Bacteria; p__Firmicutes; c__Clostridia; o__Clostridiales; f__Peptococcaceae; g__Peptococcus; s__uncultured organism
OTU_1825	0	9	1	2	0	0	0	0	0	1	8	2	4	k__Bacteria; p__Bacteroidetes; c__Bacteroidia; o__Bacteroidales; f__Muribaculaceae; g__uncultured bacterium; s__uncultured bacterium
OTU_1334	0	0	0	0	0	3	0	0	0	1	0	0	0	k__Bacteria; p__Firmicutes; c__Clostridia; o__Clostridiales; f__Lachnospiraceae
OTU_625	0	11	0	0	0	0	0	0	2	0	0	0	0	k__Bacteria; p__Firmicutes; c__Clostridia; o__Clostridiales; f__Clostridiales vadinBB60 group
OTU_48	0	83	11	0	0	126	20	28	0	14	1	0	8	k__Bacteria; p__Firmicutes; c__Clostridia; o__Clostridiales; f__Lachnospiraceae; g__Lachnospiraceae NK4A136 group; s__uncultured bacterium
OTU_11	2326	392	387	577	947	431	0	17	280	214	198	59	235	k__Bacteria; p__Bacteroidetes; c__Bacteroidia; o__Bacteroidales; f__Muribaculaceae; g__Muribaculum; s__uncultured bacterium
OTU_2540	0	0	0	0	0	0	0	0	0	1	0	0	1	k__Bacteria; p__Bacteroidetes; c__Bacteroidia; o__Bacteroidales; f__Prevotellaceae; g__Alloprevotella; s__uncultured Bacteroidales bacterium
OTU_773	0	0	0	0	0	4	1	0	0	3	1	0	0	k__Bacteria; p__Firmicutes; c__Clostridia; o__Clostridiales; f__Christensenellaceae; g__uncultured; s__uncultured bacterium
OTU_519	0	4	0	0	0	1	0	0	0	0	0	1	18	k__Bacteria; p__Firmicutes; c__Clostridia; o__Clostridiales; f__Ruminococcaceae; g__Ruminococcaceae UCG-014
OTU_215	0	0	0	0	0	0	0	2	2	0	0	0	8	k__Bacteria; p__Firmicutes; c__Clostridia; o__Clostridiales; f__Ruminococcaceae; g__Ruminococcus 1
OTU_114	1	5	13	1	1	12	11	8	1	24	1	0	1	k__Bacteria; p__Firmicutes; c__Clostridia; o__Clostridiales; f__Lachnospiraceae; g__Roseburia; s__uncultured bacterium
OTU_435	0	1	1	2	0	2	0	1	1	1	0	1	0	k__Bacteria; p__Firmicutes; c__Clostridia; o__Clostridiales; f__Eubacteriaceae; g__Anaerofustis; s__uncultured bacterium
OTU_39	5	0	72	166	93	177	0	2	0	32	0	27	0	k__Bacteria; p__Bacteroidetes; c__Bacteroidia; o__Bacteroidales; f__Rikenellaceae
OTU_498	0	0	0	0	0	0	0	0	0	0	0	0	0	k__Bacteria; p__Firmicutes; c__Clostridia; o__Clostridiales; f__Lachnospiraceae; g__Lachnospiraceae NK4A136 group; s__uncultured bacterium
OTU_506	9	0	6	6	3	5	0	0	8	63	9	8	14	k__Bacteria; p__Bacteroidetes; c__Bacteroidia; o__Bacteroidales; f__Bacteroidaceae; g__Bacteroides
OTU_2268	2	0	7	2	2	9	0	0	0	1	0	1	0	k__Bacteria; p__Bacteroidetes; c__Bacteroidia; o__Bacteroidales; f__Muribaculaceae; g__uncultured bacterium; s__uncultured bacterium
OTU_166	12	6	10	7	10	8	3	10	5	9	14	16	24	k__Bacteria; p__Actinobacteria; c__Actinobacteria; o__Bifidobacteriales; f__Bifidobacteriaceae; g__Bifidobacterium; s__Bifidobacterium longum subsp. longum
OTU_221	9	3	21	15	12	17	7	32	8	22	20	16	27	k__Bacteria; p__Firmicutes; c__Bacilli; o__Bacillales; f__Staphylococcaceae; g__Staphylococcus
OTU_150	0	0	1	1	0	0	6	21	2	0	2	1	0	k__Bacteria; p__Bacteroidetes; c__Bacteroidia; o__Bacteroidales; f__Prevotellaceae; g__Prevotella 2
OTU_722	0	0	2	0	0	0	0	0	0	0	0	3	0	k__Bacteria; p__Firmicutes; c__Clostridia; o__Clostridiales; f__Family XI; g__Ezakiella; s__Tissierellia bacterium S7-1-4
OTU_908	0	0	1	0	0	0	0	0	0	0	0	0	0	k__Bacteria; p__Firmicutes; c__Clostridia; o__Clostridiales; f__Ruminococcaceae
OTU_1079	0	1	3	1	0	9	7	1	3	1	1	1	4	k__Bacteria; p__Firmicutes; c__Clostridia; o__Clostridiales; f__Lachnospiraceae; g__Lachnospiraceae NK4A136 group; s__Lachnospiraceae bacterium 10-1
OTU_87	67	12	3	6	2	2	13	48	85	5	40	2	0	k__Bacteria; p__Bacteroidetes; c__Bacteroidia; o__Bacteroidales; f__Muribaculaceae; g__uncultured bacterium; s__uncultured bacterium
OTU_946	0	0	0	0	0	2	0	0	0	5	2	0	0	k__Bacteria; p__Firmicutes; c__Clostridia; o__Clostridiales; f__Clostridiales vadinBB60 group; g__uncultured bacterium; s__uncultured bacterium
OTU_83	1	3	5	0	148	32	2	0	54	2	14	10	5	k__Bacteria; p__Firmicutes; c__Clostridia; o__Clostridiales; f__Ruminococcaceae; g__Ruminococcaceae UCG-010; s__uncultured organism
OTU_2918	6	0	3	6	2	0	0	0	0	9	1	8	28	k__Bacteria; p__Bacteroidetes; c__Bacteroidia; o__Bacteroidales
OTU_985	4	17	0	0	0	4	0	1	1	0	0	0	1	k__Bacteria; p__Firmicutes; c__Clostridia; o__Clostridiales; f__Lachnospiraceae; g__Lachnospiraceae NK4A136 group; s__uncultured bacterium
OTU_7	815	242	823	60	157	4	0	1	1068	596	218	1513	1199	k__Bacteria; p__Bacteroidetes; c__Bacteroidia; o__Bacteroidales; f__Muribaculaceae; g__uncultured bacterium; s__uncultured bacterium
OTU_1789	0	0	0	0	0	0	0	0	0	0	0	0	0	k__Bacteria; p__Bacteroidetes; c__Bacteroidia; o__Bacteroidales; f__Muribaculaceae
OTU_1661	0	0	0	2	0	0	0	0	0	0	3	0	0	k__Bacteria; p__Bacteroidetes; c__Bacteroidia; o__Bacteroidales; f__Muribaculaceae; g__uncultured bacterium; s__uncultured bacterium
OTU_2182	1	0	2	3	0	3	0	0	0	3	1	1	0	k__Bacteria; p__Bacteroidetes; c__Bacteroidia; o__Bacteroidales; f__Muribaculaceae; g__uncultured bacterium; s__uncultured bacterium
OTU_1332	0	0	0	0	0	0	0	0	0	0	0	0	0	k__Bacteria; p__Firmicutes; c__Erysipelotrichia; o__Erysipelotrichales; f__Erysipelotrichaceae; g__Holdemanella; s__uncultured bacterium
OTU_623	0	0	1	0	1	3	0	3	0	3	1	0	0	k__Bacteria; p__Firmicutes; c__Clostridia; o__Clostridiales; f__Lachnospiraceae; g__uncultured; s__uncultured bacterium
OTU_395	1	1	1	1	6	1	4	0	0	4	1	1	0	k__Bacteria; p__Firmicutes; c__Clostridia; o__Clostridiales; f__Ruminococcaceae; g__Anaerotruncus
OTU_295	7	4	5	53	39	0	0	0	29	0	13	11	0	k__Bacteria; p__Proteobacteria; c__Gammaproteobacteria; o__Betaproteobacteriales; f__Burkholderiaceae; g__Parasutterella; s__Burkholderiales bacterium YL45
OTU_992	1	0	0	0	0	197	0	7	0	0	0	0	0	k__Bacteria; p__Firmicutes; c__Clostridia; o__Clostridiales; f__Lachnospiraceae; g__Lachnospiraceae NK4A136 group; s__uncultured bacterium
OTU_266	0	20	0	0	0	0	0	0	0	2	0	1	1	k__Bacteria; p__Firmicutes; c__Clostridia; o__Clostridiales; f__Ruminococcaceae; g__Ruminococcaceae UCG-005; s__uncultured Clostridiales bacterium
OTU_485	0	0	0	0	0	0	10	0	0	0	0	0	0	k__Bacteria; p__Proteobacteria; c__Gammaproteobacteria; o__Xanthomonadales; f__Xanthomonadaceae; g__Pseudoxanthomonas
OTU_2057	15	23	20	0	0	4	0	0	4	2	0	5	16	k__Bacteria; p__Bacteroidetes; c__Bacteroidia; o__Bacteroidales; f__Muribaculaceae; g__uncultured bacterium; s__uncultured bacterium
OTU_558	0	0	0	2	5	1	0	0	1	2	0	0	0	k__Bacteria; p__Firmicutes; c__Clostridia; o__Clostridiales; f__Clostridiales vadinBB60 group; g__uncultured bacterium; s__uncultured bacterium
OTU_2335	1	0	0	5	2	0	0	0	1	0	3	2	0	k__Bacteria; p__Bacteroidetes; c__Bacteroidia; o__Bacteroidales; f__Muribaculaceae; g__uncultured bacterium; s__uncultured bacterium
OTU_2462	0	74	19	0	1	0	0	0	2	9	11	9	16	k__Bacteria; p__Bacteroidetes; c__Bacteroidia; o__Bacteroidales; f__Muribaculaceae; g__uncultured bacterium; s__uncultured bacterium
OTU_861	0	0	0	0	0	2	0	0	1	0	0	0	1	k__Bacteria; p__Firmicutes; c__Clostridia; o__Clostridiales; f__Lachnospiraceae
OTU_308	9	8	1	0	0	0	0	0	1	0	1	6	9	k__Bacteria; p__Firmicutes; c__Clostridia; o__Clostridiales; f__Family XI; g__Ezakiella; s__Fenollaria timonensis
OTU_1556	0	0	0	0	0	0	0	0	0	0	0	0	0	k__Bacteria; p__Bacteroidetes; c__Bacteroidia; o__Bacteroidales; f__Muribaculaceae; g__uncultured bacterium; s__uncultured bacterium
OTU_127	0	85	11	0	111	57	61	5	3	1	66	0	0	k__Bacteria; p__Firmicutes; c__Clostridia; o__Clostridiales; f__Lachnospiraceae; g__Blautia; s__Lachnospiraceae bacterium 615
OTU_1011	0	0	0	0	0	0	0	0	0	0	0	0	0	k__Bacteria; p__Actinobacteria; c__Coriobacteriia; o__Coriobacteriales; f__Eggerthellaceae; g__DNF00809; s__uncultured bacterium
OTU_61	3	165	1	0	15	47	0	0	1	0	0	0	0	k__Bacteria; p__Bacteroidetes; c__Bacteroidia; o__Bacteroidales; f__Rikenellaceae; g__Alistipes; s__uncultured bacterium
OTU_1411	0	2	0	3	0	1	0	0	2	4	0	1	3	k__Bacteria; p__Firmicutes; c__Clostridia; o__Clostridiales; f__Ruminococcaceae; g__Ruminiclostridium 9; s__uncultured bacterium
OTU_371	0	0	1	1	0	0	2	3	0	0	3	1	3	k__Bacteria; p__Firmicutes; c__Clostridia; o__Clostridiales; f__Ruminococcaceae; g__Subdoligranulum; s__uncultured bacterium
OTU_35	65	216	167	52	615	16	45	37	248	192	146	671	90	k__Bacteria; p__Bacteroidetes; c__Bacteroidia; o__Bacteroidales; f__Muribaculaceae; g__uncultured bacterium; s__uncultured bacterium
OTU_373	8	0	5	0	5	0	0	0	21	0	0	0	0	k__Bacteria; p__Firmicutes; c__Clostridia; o__Clostridiales; f__Ruminococcaceae; g__Ruminococcaceae UCG-011; s__uncultured rumen bacterium
OTU_750	0	0	0	1	1	1	0	0	1	0	0	2	3	k__Bacteria; p__Firmicutes; c__Clostridia; o__Clostridiales; f__Family XI; g__Anaerococcus
OTU_71	83	30	102	70	69	48	54	38	14	27	3	15	9	k__Bacteria; p__Bacteroidetes; c__Bacteroidia; o__Bacteroidales; f__Muribaculaceae; g__uncultured bacterium; s__uncultured bacterium
OTU_1084	0	0	16	0	8	0	0	0	0	1	0	0	0	k__Bacteria; p__Bacteroidetes; c__Bacteroidia; o__Bacteroidales; f__Muribaculaceae; g__uncultured bacterium; s__uncultured bacterium
OTU_223	0	11	10	0	0	21	2	0	0	0	0	0	0	k__Bacteria; p__Firmicutes; c__Clostridia; o__Clostridiales; f__Lachnospiraceae
OTU_666	0	0	0	0	0	0	0	0	0	0	0	0	0	k__Bacteria; p__Cyanobacteria; c__Melainabacteria; o__Gastranaerophilales; f__uncultured bacterium; g__uncultured bacterium; s__uncultured bacterium
OTU_1167	7	2	7	0	0	0	0	0	1	0	0	0	0	k__Bacteria; p__Bacteroidetes; c__Bacteroidia; o__Bacteroidales; f__Muribaculaceae
OTU_239	0	3	3	38	2	11	0	0	1	0	1	2	0	k__Bacteria; p__Firmicutes; c__Clostridia; o__Clostridiales; f__Clostridiales vadinBB60 group; g__uncultured bacterium; s__uncultured bacterium
OTU_178	0	14	8	0	9	4	0	5	0	1	2	0	1	k__Bacteria; p__Firmicutes; c__Clostridia; o__Clostridiales; f__Lachnospiraceae; g__uncultured; s__Clostridium sp. Culture-27
OTU_113	21	119	24	35	1	76	5	14	19	31	0	0	5	k__Bacteria; p__Firmicutes; c__Clostridia; o__Clostridiales; f__Lachnospiraceae; g__Lachnospiraceae UCG-006; s__uncultured bacterium
OTU_330	0	1	0	1	4	19	0	3	0	72	1	0	3	k__Bacteria; p__Firmicutes; c__Clostridia; o__Clostridiales; f__Lachnospiraceae
OTU_268	1	2	2	2	0	2	31	1	0	8	1	0	0	k__Bacteria; p__Firmicutes; c__Clostridia; o__Clostridiales; f__Family XIII; g__Family XIII UCG-001; s__uncultured bacterium
OTU_848	0	0	0	0	0	0	0	0	0	0	0	0	0	k__Bacteria; p__Firmicutes; c__Bacilli; o__Lactobacillales; f__Streptococcaceae; g__Lactococcus; s__Lactococcus garvieae subsp. garvieae
OTU_2224	0	1	1	1	1	0	0	0	1	2	1	1	0	k__Bacteria; p__Firmicutes; c__Clostridia; o__Clostridiales; f__Ruminococcaceae
OTU_116	23	0	76	0	0	3	0	0	40	0	0	20	9	k__Bacteria; p__Firmicutes; c__Clostridia; o__Clostridiales; f__Ruminococcaceae; g__Ruminococcus 1
OTU_372	0	2	4	0	0	0	0	0	24	0	0	0	0	k__Bacteria; p__Firmicutes; c__Clostridia; o__Clostridiales; f__Ruminococcaceae; g__Ruminococcaceae UCG-013
OTU_1803	0	0	0	0	0	0	2	2	0	1	0	0	0	k__Bacteria; p__Firmicutes; c__Clostridia; o__Clostridiales; f__Ruminococcaceae; g__Ruminiclostridium 5
OTU_347	2	2	0	2	1	0	3	1	2	1	1	0	4	k__Bacteria; p__Firmicutes; c__Clostridia; o__Clostridiales; f__Lachnospiraceae; g__Lachnospiraceae FCS020 group; s__uncultured bacterium
OTU_2476	2	0	0	0	0	0	0	0	0	1	0	2	0	k__Bacteria; p__Bacteroidetes; c__Bacteroidia; o__Bacteroidales; f__Muribaculaceae
OTU_2187	0	0	3	0	0	6	0	0	0	0	2	0	0	k__Bacteria; p__Bacteroidetes; c__Bacteroidia; o__Bacteroidales; f__Muribaculaceae
OTU_691	1	1	0	15	0	0	6	15	9	0	0	0	0	k__Bacteria; p__Actinobacteria; c__Coriobacteriia; o__Coriobacteriales; f__Eggerthellaceae; g__Enterorhabdus; s__uncultured bacterium
OTU_964	0	0	1	0	0	5	0	3	0	0	3	0	0	k__Bacteria; p__Firmicutes; c__Clostridia; o__Clostridiales; f__Lachnospiraceae; g__Lachnospiraceae NK4A136 group; s__uncultured bacterium
OTU_24	16	18	17	26	37	50	51	33	15	65	15	49	48	k__Bacteria; p__Proteobacteria; c__Gammaproteobacteria; o__Enterobacteriales; f__Enterobacteriaceae; g__Escherichia-Shigella; s__Escherichia coli
OTU_1228	0	8	2	0	0	79	0	0	0	0	8	0	1	k__Bacteria; p__Firmicutes; c__Clostridia; o__Clostridiales; f__Ruminococcaceae; g__Intestinimonas
OTU_1213	0	1	0	0	0	0	0	0	0	1	0	0	0	k__Bacteria; p__Firmicutes; c__Clostridia; o__Clostridiales; f__Ruminococcaceae
OTU_1855	0	5	0	0	0	1	1	0	0	0	0	0	1	k__Bacteria; p__Firmicutes; c__Clostridia; o__Clostridiales
OTU_96	12	9	7	1	2	2	45	9	5	4	4	6	24	k__Bacteria; p__Firmicutes; c__Clostridia; o__Clostridiales; f__Ruminococcaceae; g__Faecalibacterium; s__uncultured bacterium
OTU_259	1	12	11	0	0	25	1	0	4	3	0	0	3	k__Bacteria; p__Firmicutes; c__Clostridia; o__Clostridiales; f__Ruminococcaceae; g__uncultured; s__unidentified
OTU_157	0	12	31	11	20	91	0	0	36	1	14	9	5	k__Bacteria; p__Firmicutes; c__Clostridia; o__Clostridiales; f__Clostridiales vadinBB60 group; g__uncultured bacterium; s__uncultured bacterium
OTU_2404	0	0	0	0	0	0	0	0	0	0	0	0	0	k__Bacteria; p__Bacteroidetes; c__Bacteroidia; o__Bacteroidales
OTU_85	0	0	0	0	1	0	153	14	0	1	3	1	0	k__Bacteria; p__Epsilonbacteraeota; c__Campylobacteria; o__Campylobacterales; f__Helicobacteraceae; g__Helicobacter
OTU_179	2	34	2	20	7	33	0	0	28	28	0	1	17	k__Bacteria; p__Firmicutes; c__Clostridia; o__Clostridiales; f__Lachnospiraceae; g__Tyzzerella; s__uncultured bacterium
OTU_1938	0	0	9	0	0	0	0	0	0	3	2	0	0	k__Bacteria; p__Bacteroidetes; c__Bacteroidia; o__Bacteroidales; f__Muribaculaceae; g__uncultured bacterium; s__uncultured bacterium
OTU_2958	0	0	0	0	0	0	0	0	0	0	0	0	0	k__Bacteria; p__Firmicutes; c__Clostridia; o__Clostridiales
OTU_2588	8	0	0	0	0	0	4	0	0	0	0	0	1	k__Bacteria; p__Firmicutes; c__Clostridia; o__Clostridiales; f__Family XIII; g__[Eubacterium] nodatum group; s__uncultured bacterium
OTU_1449	0	9	6	1	11	3	0	0	3	0	1	1	0	k__Bacteria; p__Firmicutes; c__Clostridia; o__Clostridiales; f__Clostridiales vadinBB60 group; g__uncultured bacterium; s__uncultured bacterium
OTU_104	0	43	1	0	1	20	0	3	0	0	12	0	4	k__Bacteria; p__Firmicutes; c__Clostridia; o__Clostridiales; f__Lachnospiraceae
OTU_2185	0	0	6	1	13	0	0	0	0	6	3	7	0	k__Bacteria; p__Bacteroidetes; c__Bacteroidia; o__Bacteroidales; f__Muribaculaceae; g__uncultured bacterium; s__uncultured bacterium
OTU_162	1	105	11	1	3	167	206	13	1	84	13	5	46	k__Bacteria; p__Firmicutes; c__Clostridia; o__Clostridiales; f__Ruminococcaceae
OTU_775	1	9	10	0	0	23	0	24	4	3	12	0	2	k__Bacteria; p__Firmicutes; c__Clostridia; o__Clostridiales; f__Ruminococcaceae; g__Ruminococcaceae UCG-014; s__uncultured bacterium
OTU_317	229	8	112	210	66	699	12	6	46	134	84	120	75	k__Bacteria; p__Bacteroidetes; c__Bacteroidia; o__Bacteroidales; f__Rikenellaceae; g__Alistipes
OTU_2384	2	0	3	0	0	1	0	0	0	0	0	0	0	k__Bacteria; p__Bacteroidetes; c__Bacteroidia; o__Bacteroidales; f__Muribaculaceae; g__uncultured bacterium; s__uncultured bacterium
OTU_292	0	0	3	0	0	2	3	0	0	0	0	1	3	k__Bacteria; p__Firmicutes; c__Clostridia; o__Clostridiales; f__Ruminococcaceae; g__Ruminiclostridium 6; s__uncultured bacterium
OTU_288	0	0	0	0	0	9	18	0	0	0	0	0	5	k__Bacteria; p__Firmicutes; c__Clostridia; o__Clostridiales; f__Ruminococcaceae
OTU_204	0	16	3	0	2	4	13	0	0	0	0	0	0	k__Bacteria; p__Firmicutes; c__Clostridia; o__Clostridiales; f__Lachnospiraceae
OTU_145	11	1	5	6	8	4	3	1	110	2	6	3	9	k__Bacteria; p__Firmicutes; c__Clostridia; o__Clostridiales; f__Defluviitaleaceae; g__Defluviitaleaceae UCG-011; s__uncultured organism
OTU_740	0	3	0	1	0	0	12	2	0	1	1	0	1	k__Bacteria; p__Bacteroidetes; c__Bacteroidia; o__Bacteroidales; f__Bacteroidaceae; g__Bacteroides; s__Bacteroides ovatus V975
OTU_893	0	0	2	0	0	0	0	0	0	0	0	0	0	k__Bacteria; p__Firmicutes; c__Clostridia; o__Clostridiales; f__Ruminococcaceae; g__Ruminiclostridium; s__uncultured organism
OTU_1159	0	0	0	0	1	2	0	4	0	0	2	1	0	k__Bacteria; p__Firmicutes; c__Clostridia; o__Clostridiales; f__Lachnospiraceae; g__Lachnospiraceae NK4A136 group; s__Lachnospiraceae bacterium COE1
OTU_173	0	2	1	0	0	28	0	3	0	0	2	0	4	k__Bacteria; p__Firmicutes; c__Clostridia; o__Clostridiales; f__Lachnospiraceae; g__Roseburia
OTU_662	0	0	0	0	1	0	0	0	0	0	0	0	1	k__Bacteria; p__Firmicutes; c__Negativicutes; o__Selenomonadales; f__Veillonellaceae; g__Dialister; s__uncultured bacterium
OTU_291	0	0	0	0	0	0	0	0	0	0	6	0	0	k__Bacteria; p__Fusobacteria; c__Fusobacteriia; o__Fusobacteriales; f__Fusobacteriaceae; g__Cetobacterium; s__uncultured bacterium
OTU_370	0	1	0	0	0	1	3	1	6	3	0	0	0	k__Bacteria; p__Firmicutes; c__Clostridia; o__Clostridiales; f__Ruminococcaceae; g__Ruminiclostridium 5; s__uncultured Clostridiales bacterium
OTU_365	0	3	9	15	0	11	0	0	0	3	1	1	0	k__Bacteria; p__Firmicutes; c__Clostridia; o__Clostridiales; f__Clostridiales vadinBB60 group; g__uncultured Clostridia bacterium; s__uncultured Clostridia bacterium
OTU_1384	4	0	0	0	0	0	0	0	1	2	1	0	4	k__Bacteria; p__Bacteroidetes; c__Bacteroidia; o__Bacteroidales; f__Muribaculaceae; g__uncultured bacterium; s__uncultured bacterium
OTU_1437	0	0	0	0	0	0	0	0	0	0	0	0	0	k__Bacteria; p__Bacteroidetes; c__Bacteroidia; o__Bacteroidales
OTU_1081	0	312	22	0	2	0	0	0	3	1	11	4	2	k__Bacteria; p__Bacteroidetes; c__Bacteroidia; o__Bacteroidales; f__Muribaculaceae; g__uncultured bacterium; s__uncultured bacterium
OTU_99	7	45	4	21	16	89	29	13	30	6	3	16	2	k__Bacteria; p__Firmicutes; c__Clostridia; o__Clostridiales; f__Lachnospiraceae; g__uncultured; s__uncultured bacterium
OTU_852	5	1	0	0	0	6	21	1	0	5	1	0	0	k__Bacteria; p__Firmicutes; c__Clostridia; o__Clostridiales; f__Lachnospiraceae
OTU_228	0	0	6	11	3	2	14	17	12	5	0	11	0	k__Bacteria; p__Firmicutes; c__Clostridia; o__Clostridiales; f__Lachnospiraceae; g__Marvinbryantia; s__Clostridiales bacterium CIEAF 012
OTU_440	2	0	0	0	0	0	0	0	42	0	0	0	0	k__Bacteria; p__Bacteroidetes; c__Bacteroidia; o__Bacteroidales; f__Muribaculaceae; g__uncultured bacterium; s__uncultured bacterium
OTU_635	0	0	0	1	0	0	0	0	0	5	0	0	0	k__Bacteria; p__Firmicutes; c__Clostridia; o__Clostridiales; f__Ruminococcaceae; g__Harryflintia; s__uncultured bacterium
OTU_796	0	0	0	0	0	0	0	0	2	0	0	0	0	k__Bacteria; p__Proteobacteria; c__Gammaproteobacteria; o__Pseudomonadales; f__Moraxellaceae; g__Acinetobacter; s__Acinetobacter lwoffii
OTU_192	1	17	0	0	0	8	0	1	4	8	0	1	4	k__Bacteria; p__Firmicutes; c__Clostridia; o__Clostridiales; f__Lachnospiraceae
OTU_198	1	29	2	4	1	24	9	0	1	15	4	0	1	k__Bacteria; p__Firmicutes; c__Clostridia; o__Clostridiales; f__Family XIII; g__[Eubacterium] brachy group; s__uncultured bacterium
OTU_2605	0	5	0	0	0	0	0	0	0	0	0	0	0	k__Bacteria; p__Firmicutes; c__Clostridia; o__Clostridiales; f__Clostridiales vadinBB60 group; g__uncultured bacterium; s__uncultured bacterium
OTU_2045	0	0	0	0	0	0	0	0	0	0	0	0	0	k__Bacteria; p__Bacteroidetes; c__Bacteroidia; o__Bacteroidales; f__Muribaculaceae; g__uncultured bacterium; s__uncultured bacterium
OTU_2783	0	0	0	0	0	0	0	0	0	0	0	0	0	k__Bacteria; p__Bacteroidetes; c__Bacteroidia; o__Bacteroidales; f__Prevotellaceae; g__Alloprevotella
OTU_1205	0	0	0	0	0	0	0	0	0	0	0	0	0	k__Bacteria; p__Bacteroidetes; c__Bacteroidia; o__Bacteroidales; f__Muribaculaceae; g__uncultured bacterium; s__uncultured bacterium
OTU_777	0	0	6	0	0	1	0	0	0	0	0	0	0	k__Bacteria; p__Firmicutes; c__Clostridia; o__Clostridiales; f__Ruminococcaceae; g__Ruminiclostridium 1; s__uncultured bacterium
OTU_1098	112	6	28	16	63	9	0	0	10	11	4	9	10	k__Bacteria; p__Bacteroidetes; c__Bacteroidia; o__Bacteroidales; f__Muribaculaceae
OTU_1985	0	0	0	0	0	0	0	0	0	0	0	0	0	k__Bacteria; p__Firmicutes; c__Clostridia; o__Clostridiales; f__Ruminococcaceae; g__Ruminiclostridium 9; s__uncultured bacterium
OTU_2577	0	0	2	0	0	1	0	0	1	0	2	0	0	k__Bacteria; p__Firmicutes; c__Clostridia; o__Clostridiales; f__Clostridiales vadinBB60 group; g__uncultured bacterium; s__uncultured bacterium
OTU_68	7	8	6	37	33	12	427	27	15	22	7	30	24	k__Bacteria; p__Bacteroidetes; c__Bacteroidia; o__Bacteroidales; f__Bacteroidaceae; g__Bacteroides
OTU_350	2	0	5	4	2	0	10	0	4	1	0	0	0	k__Bacteria; p__Firmicutes; c__Clostridia; o__Clostridiales; f__Christensenellaceae; g__uncultured; s__uncultured bacterium
OTU_168	1	1	2	0	0	0	24	0	0	0	0	0	1	k__Bacteria; p__Firmicutes; c__Clostridia; o__Clostridiales; f__Ruminococcaceae; g__Subdoligranulum; s__uncultured bacterium
OTU_383	0	1	0	1	0	0	40	12	0	0	0	0	1	k__Bacteria; p__Bacteroidetes; c__Bacteroidia; o__Bacteroidales; f__Muribaculaceae; g__uncultured bacterium; s__uncultured bacterium
OTU_576	0	0	0	0	0	0	1	2	4	0	2	0	0	k__Bacteria; p__Actinobacteria; c__Coriobacteriia; o__Coriobacteriales; f__Eggerthellaceae
OTU_1612	0	0	0	0	0	1	0	0	0	0	0	0	0	k__Bacteria; p__Firmicutes; c__Clostridia; o__Clostridiales; f__Ruminococcaceae; g__Ruminiclostridium 9; s__gut metagenome
OTU_1302	0	23	5	4	0	5	14	0	1	3	1	3	1	k__Bacteria; p__Firmicutes; c__Clostridia; o__Clostridiales; f__Ruminococcaceae
OTU_1866	0	1	0	0	0	0	0	1	0	0	0	0	0	k__Bacteria; p__Firmicutes; c__Clostridia; o__Clostridiales; f__Lachnospiraceae; g__Lachnospiraceae NK4A136 group
OTU_38	2	6	2	0	0	0	0	2	1	2	1	0	0	k__Bacteria; p__Firmicutes; c__Negativicutes; o__Selenomonadales; f__Veillonellaceae; g__Megamonas; s__uncultured bacterium
OTU_2657	0	0	0	0	0	0	0	0	0	0	0	1	0	k__Bacteria; p__Bacteroidetes; c__Bacteroidia; o__Bacteroidales
OTU_2643	0	0	0	0	0	0	0	0	0	0	0	0	3	k__Bacteria
OTU_2345	4	0	6	0	1	0	0	0	2	1	0	0	1	k__Bacteria; p__Bacteroidetes; c__Bacteroidia; o__Bacteroidales; f__Muribaculaceae; g__uncultured bacterium; s__uncultured bacterium
OTU_997	0	0	0	0	0	0	0	0	0	0	0	0	0	k__Bacteria; p__Bacteroidetes; c__Bacteroidia; o__Bacteroidales; f__Muribaculaceae; g__uncultured bacterium; s__uncultured bacterium
OTU_589	0	0	0	5	8	16	6	1	1	5	1	0	12	k__Bacteria; p__Bacteroidetes; c__Bacteroidia; o__Bacteroidales; f__Porphyromonadaceae; g__Porphyromonas; s__Porphyromonas sp. HMSC065F10
OTU_90	9	47	17	30	5	12	13	17	133	16	130	3	9	k__Bacteria; p__Bacteroidetes; c__Bacteroidia; o__Bacteroidales; f__Muribaculaceae; g__uncultured bacterium; s__uncultured bacterium
OTU_36	0	25	1	1	3	122	6	1	97	22	286	22	195	k__Bacteria; p__Firmicutes; c__Clostridia; o__Clostridiales; f__Ruminococcaceae; g__[Eubacterium] coprostanoligenes group; s__uncultured organism
OTU_1325	0	9	6	0	1	7	0	0	8	12	2	1	4	k__Bacteria; p__Firmicutes; c__Clostridia; o__Clostridiales; f__Ruminococcaceae; g__Ruminiclostridium; s__uncultured bacterium
OTU_421	0	0	0	0	4	0	21	1	0	0	0	0	1	k__Bacteria; p__Proteobacteria; c__Gammaproteobacteria; o__Betaproteobacteriales; f__Burkholderiaceae; g__Parasutterella
OTU_181	0	72	1	0	0	27	2	4	0	8	0	0	1	k__Bacteria; p__Firmicutes; c__Clostridia; o__Clostridiales; f__Lachnospiraceae; g__Roseburia
OTU_1759	0	0	1	0	0	0	0	0	0	0	0	0	0	k__Bacteria; p__Bacteroidetes; c__Bacteroidia; o__Bacteroidales; f__Muribaculaceae; g__uncultured bacterium; s__uncultured bacterium
OTU_1216	0	1	0	0	0	0	0	0	0	0	0	0	0	k__Bacteria; p__Tenericutes; c__Mollicutes; o__Mollicutes RF39
OTU_206	0	3	0	0	2	6	83	2	0	2	0	0	1	k__Bacteria; p__Firmicutes; c__Clostridia; o__Clostridiales; f__Lachnospiraceae; g__Lachnospiraceae NK4A136 group; s__uncultured bacterium
OTU_1944	0	1	0	1	0	0	0	2	0	0	0	0	0	k__Bacteria; p__Actinobacteria; c__Coriobacteriia; o__Coriobacteriales; f__Eggerthellaceae; g__Enterorhabdus; s__uncultured bacterium
OTU_226	0	0	2	0	1	3	11	0	1	0	0	0	2	k__Bacteria; p__Firmicutes; c__Clostridia; o__Clostridiales; f__Lachnospiraceae
OTU_789	1	0	2	0	0	0	0	0	0	0	0	0	0	k__Bacteria; p__Bacteroidetes; c__Bacteroidia; o__Bacteroidales; f__Muribaculaceae; g__uncultured bacterium; s__uncultured bacterium
OTU_1552	0	0	0	0	0	0	0	0	0	0	0	0	0	k__Bacteria; p__Firmicutes; c__Clostridia; o__Clostridiales; f__Lachnospiraceae
OTU_504	38	43	6	11	26	27	2	0	2	5	6	18	10	k__Bacteria; p__Bacteroidetes; c__Bacteroidia; o__Bacteroidales; f__Rikenellaceae; g__Alistipes; s__uncultured bacterium
OTU_2944	1	0	1	0	2	0	0	0	1	0	0	0	0	k__Bacteria; p__Bacteroidetes; c__Bacteroidia; o__Bacteroidales; f__Muribaculaceae; g__uncultured bacterium; s__uncultured bacterium
OTU_144	0	11	7	1	1	2	6	32	9	0	12	4	1	k__Bacteria; p__Actinobacteria; c__Coriobacteriia; o__Coriobacteriales; f__Eggerthellaceae
OTU_49	51	60	48	61	12	83	20	7	30	174	66	59	47	k__Bacteria; p__Bacteroidetes; c__Bacteroidia; o__Bacteroidales; f__Muribaculaceae; g__uncultured bacterium; s__uncultured bacterium
OTU_194	0	0	13	3	0	0	0	0	0	0	0	168	7	k__Bacteria; p__Firmicutes; c__Erysipelotrichia; o__Erysipelotrichales; f__Erysipelotrichaceae; g__uncultured bacterium; s__uncultured bacterium
OTU_525	0	8	0	0	0	1	0	0	0	1	0	0	2	k__Bacteria; p__Firmicutes; c__Clostridia; o__Clostridiales; f__Ruminococcaceae; g__Ruminococcaceae UCG-005
OTU_346	0	0	6	2	11	2	0	2	2	0	0	1	1	k__Bacteria; p__Firmicutes; c__Erysipelotrichia; o__Erysipelotrichales; f__Erysipelotrichaceae; g__uncultured; s__uncultured bacterium
OTU_1893	0	0	0	0	0	0	0	0	0	0	0	0	0	k__Bacteria; p__Bacteroidetes; c__Bacteroidia; o__Bacteroidales; f__Muribaculaceae; g__uncultured bacterium; s__uncultured bacterium
OTU_502	0	0	0	0	0	2	0	0	0	0	0	0	2	k__Bacteria; p__Fusobacteria; c__Fusobacteriia; o__Fusobacteriales; f__Fusobacteriaceae; g__Fusobacterium; s__uncultured bacterium
OTU_500	0	0	1	0	0	0	2	0	0	0	0	0	1	k__Bacteria; p__Bacteroidetes; c__Bacteroidia; o__Bacteroidales; f__Tannerellaceae; g__Parabacteroides
OTU_1343	0	0	2	0	0	0	0	0	0	0	0	0	0	k__Bacteria; p__Bacteroidetes; c__Bacteroidia; o__Bacteroidales; f__Muribaculaceae; g__uncultured bacterium; s__uncultured bacterium
OTU_1971	2	0	0	0	0	3	0	0	0	0	0	0	0	k__Bacteria; p__Bacteroidetes; c__Bacteroidia; o__Bacteroidales; f__Muribaculaceae; g__uncultured bacterium; s__uncultured bacterium
OTU_607	0	2	1	0	0	4	0	0	0	0	0	0	0	k__Bacteria; p__Firmicutes; c__Clostridia; o__Clostridiales; f__Lachnospiraceae
OTU_1891	1	0	17	0	13	0	0	0	3	6	104	56	31	k__Bacteria; p__Bacteroidetes; c__Bacteroidia; o__Bacteroidales; f__Muribaculaceae; g__uncultured bacterium; s__uncultured bacterium
OTU_237	0	1	0	0	0	14	0	1	3	0	0	0	1	k__Bacteria; p__Firmicutes; c__Clostridia; o__Clostridiales; f__Lachnospiraceae; g__Lachnospiraceae NK4A136 group
OTU_2251	0	0	2	0	0	0	0	0	0	0	0	2	0	k__Bacteria; p__Bacteroidetes; c__Bacteroidia; o__Bacteroidales
OTU_1070	0	0	13	0	0	38	0	0	0	0	0	0	0	k__Bacteria; p__Firmicutes; c__Clostridia; o__Clostridiales; f__Clostridiales vadinBB60 group; g__uncultured bacterium; s__uncultured bacterium
OTU_541	0	0	1	0	0	0	0	0	13	0	1	1	0	k__Bacteria; p__Firmicutes; c__Erysipelotrichia; o__Erysipelotrichales; f__Erysipelotrichaceae; g__uncultured; s__uncultured bacterium
OTU_30	0	1	0	0	0	0	49	48	0	0	0	1	0	k__Bacteria; p__Proteobacteria; c__Gammaproteobacteria; o__Betaproteobacteriales; f__Burkholderiaceae
OTU_26	0	1	1	1	6	1	430	743	8	2	1	0	1	k__Bacteria; p__Firmicutes; c__Bacilli; o__Lactobacillales; f__Streptococcaceae; g__Streptococcus
OTU_1020	0	0	0	0	0	0	1	0	0	0	0	0	0	k__Bacteria; p__Firmicutes; c__Clostridia; o__Clostridiales; f__Clostridiales vadinBB60 group; g__uncultured bacterium; s__uncultured bacterium
OTU_632	0	0	0	0	1	0	6	1	1	0	0	0	0	k__Bacteria; p__Bacteroidetes; c__Bacteroidia; o__Bacteroidales; f__Bacteroidaceae; g__Bacteroides
OTU_610	5	0	0	0	0	0	0	0	0	0	0	0	4	k__Bacteria; p__Bacteroidetes; c__Bacteroidia; o__Bacteroidales; f__Prevotellaceae; g__Prevotella 6
OTU_2761	3	1	5	0	0	0	0	0	0	1	0	0	2	k__Bacteria; p__Bacteroidetes; c__Bacteroidia; o__Bacteroidales; f__Muribaculaceae; g__uncultured bacterium; s__uncultured bacterium
OTU_792	2	1	0	0	0	1	0	1	1	1	0	0	2	k__Bacteria; p__Bacteroidetes; c__Bacteroidia; o__Bacteroidales; f__Porphyromonadaceae; g__Porphyromonas; s__unidentified
OTU_1442	0	0	2	0	0	0	0	0	0	0	0	0	0	k__Bacteria; p__Bacteroidetes; c__Bacteroidia; o__Bacteroidales; f__Prevotellaceae; g__Alloprevotella
OTU_1618	2	0	0	0	4	0	0	0	0	0	0	8	0	k__Bacteria; p__Bacteroidetes; c__Bacteroidia; o__Bacteroidales
OTU_336	0	0	1	0	1	5	0	0	1	0	1	2	1	k__Bacteria; p__Firmicutes; c__Clostridia; o__Clostridiales; f__Family XIII; g__Family XIII AD3011 group; s__uncultured bacterium
OTU_170	3	7	5	106	0	17	21	2	5	10	6	1	3	k__Bacteria; p__Firmicutes; c__Clostridia; o__Clostridiales; f__Lachnospiraceae; g__uncultured; s__uncultured bacterium
OTU_2993	1	0	1	0	0	0	0	0	0	0	0	0	0	k__Bacteria; p__Bacteroidetes; c__Bacteroidia; o__Bacteroidales; f__Muribaculaceae
OTU_701	0	0	0	0	0	4	0	0	0	0	0	0	0	k__Bacteria; p__Firmicutes; c__Clostridia; o__Clostridiales; f__Lachnospiraceae
OTU_117	0	1	0	2	0	0	1	1	0	2	3	0	1	k__Bacteria; p__Firmicutes; c__Clostridia; o__Clostridiales; f__Lachnospiraceae; g__Roseburia; s__uncultured organism
OTU_193	0	0	0	0	0	0	4	1	0	0	1	0	0	k__Bacteria; p__Proteobacteria; c__Gammaproteobacteria; o__Betaproteobacteriales; f__Burkholderiaceae
OTU_1454	0	0	0	0	0	0	0	0	0	0	0	0	0	k__Bacteria; p__Bacteroidetes; c__Bacteroidia; o__Bacteroidales; f__Muribaculaceae; g__uncultured bacterium; s__uncultured bacterium
OTU_1053	0	0	0	0	0	0	0	0	0	0	0	0	1	k__Bacteria; p__Tenericutes; c__Mollicutes; o__Mollicutes RF39
OTU_629	0	0	0	0	0	0	0	0	0	0	0	0	0	k__Bacteria; p__Tenericutes; c__Mollicutes; o__Mollicutes RF39
OTU_1305	0	36	1	0	0	15	0	1	0	1	0	1	10	k__Bacteria; p__Firmicutes; c__Clostridia; o__Clostridiales; f__Ruminococcaceae
OTU_1510	0	0	1	0	0	0	0	0	0	0	0	0	0	k__Bacteria; p__Bacteroidetes; c__Bacteroidia; o__Bacteroidales; f__Prevotellaceae; g__Alloprevotella
OTU_563	0	0	0	0	1	0	0	0	1	0	0	0	0	k__Bacteria; p__Cyanobacteria; c__Melainabacteria; o__Gastranaerophilales
OTU_914	0	0	0	0	0	0	0	0	0	0	0	0	0	k__Bacteria; p__Proteobacteria; c__Alphaproteobacteria; o__Rhodobacterales; f__Rhodobacteraceae; g__Paracoccus
OTU_398	2	0	0	0	0	0	3	0	0	0	0	1	2	k__Bacteria; p__Firmicutes; c__Clostridia; o__Clostridiales; f__Ruminococcaceae; g__Ruminococcaceae UCG-005; s__uncultured organism
OTU_2287	0	4	0	0	0	0	0	0	0	5	1	0	2	k__Bacteria; p__Bacteroidetes; c__Bacteroidia; o__Bacteroidales; f__Muribaculaceae; g__uncultured bacterium; s__uncultured bacterium
OTU_60	0	1	1	2	3	4	63	256	5	1	4	0	0	k__Bacteria; p__Firmicutes; c__Bacilli; o__Bacillales; f__Family XI; g__Gemella
OTU_1453	0	0	6	1	6	0	0	0	0	5	2	20	1	k__Bacteria; p__Bacteroidetes; c__Bacteroidia; o__Bacteroidales; f__Muribaculaceae; g__uncultured bacterium; s__uncultured bacterium
OTU_177	10	3	7	2	16	15	4	6	9	5	7	15	16	k__Bacteria; p__Firmicutes; c__Clostridia; o__Clostridiales; f__Family XI; g__Finegoldia; s__uncultured bacterium
OTU_130	0	18	21	0	0	25	10	2	0	0	0	18	12	k__Bacteria; p__Firmicutes; c__Clostridia; o__Clostridiales; f__Clostridiales vadinBB60 group; g__uncultured bacterium; s__uncultured bacterium
OTU_184	0	0	0	5	9	1	0	0	0	0	2	8	0	k__Bacteria; p__Firmicutes; c__Erysipelotrichia; o__Erysipelotrichales; f__Erysipelotrichaceae; g__uncultured; s__uncultured bacterium
OTU_400	0	8	0	0	0	0	0	1	0	0	0	0	0	k__Bacteria; p__Firmicutes; c__Clostridia; o__Clostridiales; f__Ruminococcaceae; g__Ruminiclostridium; s__uncultured bacterium
OTU_1524	0	0	0	0	0	1	0	0	0	0	0	1	0	k__Bacteria; p__Firmicutes; c__Clostridia; o__Clostridiales; f__Ruminococcaceae; g__Ruminiclostridium 9; s__bacterium enrichment culture clone M244
OTU_232	5	2	3	0	16	9	2	2	0	47	4	0	1	k__Bacteria; p__Firmicutes; c__Clostridia; o__Clostridiales; f__Lachnospiraceae; g__Marvinbryantia; s__uncultured bacterium
OTU_276	0	1	0	0	0	1	4	0	0	1	0	0	0	k__Bacteria; p__Firmicutes; c__Clostridia; o__Clostridiales; f__Lachnospiraceae; g__Coprococcus 3; s__uncultured bacterium
OTU_172	9	8	6	4	7	5	8	6	5	4	4	12	4	k__Bacteria; p__Firmicutes; c__Bacilli; o__Lactobacillales; f__Enterococcaceae; g__Enterococcus; s__Enterococcus faecalis
OTU_469	0	6	3	9	2	16	0	0	2	1	1	0	2	k__Bacteria; p__Firmicutes; c__Clostridia; o__Clostridiales; f__Clostridiales vadinBB60 group; g__Clostridiales bacterium enrichment culture clone 06-1235251-67; s__Clostridiales bacterium enrichment culture clone 06-1235251-67
OTU_167	11	6	2	22	2	1	0	0	3	8	10	11	0	k__Bacteria; p__Bacteroidetes; c__Bacteroidia; o__Bacteroidales; f__Tannerellaceae; g__Parabacteroides; s__Parabacteroides goldsteinii CL02T12C30
OTU_1074	0	0	1	0	0	1	7	22	2	0	0	0	0	k__Bacteria; p__Proteobacteria; c__Gammaproteobacteria; o__Betaproteobacteriales; f__Burkholderiaceae
OTU_1282	0	0	0	0	0	0	0	0	3	0	0	0	0	k__Bacteria; p__Bacteroidetes; c__Bacteroidia; o__Bacteroidales; f__Muribaculaceae; g__uncultured bacterium; s__uncultured bacterium
OTU_115	64	0	3	13	14	3	0	0	33	12	29	341	5	k__Bacteria; p__Firmicutes; c__Clostridia; o__Clostridiales; f__Family XIII; g__Family XIII AD3011 group
OTU_1164	0	5	0	0	0	19	0	0	0	2	0	0	5	k__Bacteria; p__Firmicutes; c__Clostridia; o__Clostridiales; f__Ruminococcaceae
OTU_126	2	14	1	0	0	3	0	7	5	0	1	0	1	k__Bacteria; p__Firmicutes; c__Clostridia; o__Clostridiales; f__Lachnospiraceae
OTU_1238	0	0	1	0	0	0	0	0	3	5	8	39	40	k__Bacteria; p__Bacteroidetes; c__Bacteroidia; o__Bacteroidales; f__Rikenellaceae; g__Rikenellaceae RC9 gut group; s__uncultured bacterium
OTU_246	0	0	1	27	0	0	0	0	90	0	0	12	3	k__Bacteria; p__Firmicutes; c__Erysipelotrichia; o__Erysipelotrichales; f__Erysipelotrichaceae; g__Erysipelatoclostridium; s__uncultured bacterium
OTU_2880	0	4	0	0	0	0	0	0	0	0	0	0	0	k__Bacteria; p__Bacteroidetes; c__Bacteroidia; o__Bacteroidales; f__Muribaculaceae; g__uncultured bacterium; s__uncultured bacterium
OTU_1162	0	0	0	0	0	0	3	4	1	0	1	8	1	k__Bacteria; p__Bacteroidetes; c__Bacteroidia; o__Bacteroidales; f__Rikenellaceae; g__Alistipes
OTU_334	0	0	1	4	0	3	0	0	0	0	1	0	0	k__Bacteria; p__Firmicutes; c__Clostridia; o__Clostridiales; f__Lachnospiraceae
OTU_2024	0	0	0	0	0	1	0	0	0	0	0	0	0	k__Bacteria; p__Firmicutes; c__Clostridia; o__Clostridiales; f__Lachnospiraceae
OTU_1105	13	47	11	0	2	1	0	0	0	1	1	0	0	k__Bacteria; p__Bacteroidetes; c__Bacteroidia; o__Bacteroidales; f__Muribaculaceae; g__uncultured bacterium; s__uncultured bacterium
OTU_369	0	33	6	0	0	19	0	0	7	2	0	1	0	k__Bacteria; p__Firmicutes; c__Clostridia; o__Clostridiales; f__Lachnospiraceae; g__uncultured; s__uncultured bacterium
OTU_2927	0	0	0	0	0	0	0	0	0	0	0	0	0	k__Bacteria; p__Firmicutes; c__Clostridia; o__Clostridiales; f__Ruminococcaceae
OTU_2123	0	0	0	0	0	0	0	0	0	0	0	0	0	k__Bacteria; p__Firmicutes; c__Clostridia; o__Clostridiales; f__Lachnospiraceae; g__Lachnospiraceae NK4A136 group
OTU_1943	0	0	0	1	0	5	0	0	0	0	0	0	0	k__Bacteria; p__Firmicutes; c__Clostridia; o__Clostridiales; f__Lachnospiraceae
OTU_216	0	35	0	0	0	11	6	0	0	28	0	0	0	k__Bacteria; p__Firmicutes; c__Clostridia; o__Clostridiales; f__Lachnospiraceae
OTU_1581	0	1	4	2	3	1	0	0	9	1	13	0	0	k__Bacteria; p__Bacteroidetes; c__Bacteroidia; o__Bacteroidales; f__Muribaculaceae; g__uncultured bacterium; s__uncultured bacterium
OTU_637	0	1	3	2	2	0	1	1	0	2	2	0	2	k__Bacteria; p__Firmicutes; c__Clostridia; o__Clostridiales; f__Family XI; g__Peptoniphilus; s__uncultured bacterium
OTU_891	1	0	1	0	0	0	0	0	3	0	0	0	0	k__Bacteria; p__Firmicutes; c__Clostridia; o__Clostridiales; f__Ruminococcaceae; g__Candidatus Soleaferrea; s__Bittarella massiliensis
OTU_1760	0	0	0	0	0	0	1	0	1	0	0	0	0	k__Bacteria; p__Bacteroidetes; c__Bacteroidia; o__Bacteroidales; f__Muribaculaceae
OTU_217	0	1	0	0	0	0	7	23	2	0	0	2	0	k__Bacteria; p__Actinobacteria; c__Coriobacteriia; o__Coriobacteriales; f__Eggerthellaceae
OTU_761	0	0	0	0	0	0	2	0	0	0	0	0	0	k__Bacteria; p__Actinobacteria; c__Coriobacteriia; o__Coriobacteriales; f__Eggerthellaceae; g__Parvibacter; s__uncultured bacterium
OTU_1207	18	18	21	0	7	5	0	0	0	0	7	0	0	k__Bacteria; p__Bacteroidetes; c__Bacteroidia; o__Bacteroidales; f__Muribaculaceae
OTU_406	1	0	0	0	0	0	6	5	2	0	0	1	0	k__Bacteria; p__Firmicutes; c__Bacilli; o__Lactobacillales; f__Streptococcaceae; g__Streptococcus
OTU_1286	0	0	0	0	0	1	0	0	0	0	1	0	1	k__Bacteria; p__Firmicutes; c__Bacilli; o__Lactobacillales; f__Streptococcaceae; g__Streptococcus; s__Streptococcus pneumoniae
OTU_2356	0	4	6	0	1	0	0	0	2	4	1	6	2	k__Bacteria; p__Bacteroidetes; c__Bacteroidia; o__Bacteroidales; f__Muribaculaceae; g__uncultured bacterium; s__uncultured bacterium
OTU_169	0	0	0	0	0	0	0	0	0	0	0	0	0	k__Bacteria; p__Firmicutes; c__Clostridia; o__Clostridiales; f__Lachnospiraceae; g__Tyzzerella 3; s__unidentified
OTU_2318	0	0	0	1	0	0	0	0	0	0	0	0	0	k__Bacteria; p__Actinobacteria; c__Coriobacteriia; o__Coriobacteriales; f__Eggerthellaceae; g__Enterorhabdus
OTU_447	0	0	0	0	0	0	0	0	0	0	0	0	0	k__Bacteria; p__Proteobacteria; c__Gammaproteobacteria; o__Pasteurellales; f__Pasteurellaceae; g__Haemophilus; s__uncultured bacterium
OTU_410	0	0	0	0	0	0	0	0	2	0	0	0	0	k__Bacteria; p__Bacteroidetes; c__Bacteroidia; o__Bacteroidales; f__Marinifilaceae; g__Butyricimonas
OTU_2472	0	0	1	0	3	0	0	0	0	0	5	1	0	k__Bacteria; p__Bacteroidetes; c__Bacteroidia; o__Bacteroidales; f__Muribaculaceae; g__uncultured bacterium; s__uncultured bacterium
OTU_1147	0	2	1	0	0	3	12	2	0	0	0	1	4	k__Bacteria; p__Firmicutes; c__Clostridia; o__Clostridiales; f__Lachnospiraceae; g__Blautia
OTU_933	0	3	1	0	0	0	0	0	0	0	0	0	0	k__Bacteria; p__Firmicutes; c__Clostridia; o__Clostridiales; f__Lachnospiraceae
OTU_896	0	2	0	0	0	5	0	0	0	0	0	0	0	k__Bacteria; p__Firmicutes; c__Clostridia; o__Clostridiales; f__Lachnospiraceae
OTU_1530	0	0	0	0	0	0	0	0	0	0	0	0	0	k__Bacteria; p__Bacteroidetes; c__Bacteroidia; o__Bacteroidales
OTU_160	281	0	74	0	13	5	0	0	109	0	2	3	0	k__Bacteria; p__Bacteroidetes; c__Bacteroidia; o__Bacteroidales; f__Muribaculaceae; g__uncultured bacterium; s__uncultured bacterium
OTU_1464	0	0	0	0	0	0	0	0	1	0	0	0	0	k__Bacteria
OTU_1706	0	5	0	0	0	0	0	0	0	0	1	2	1	k__Bacteria; p__Bacteroidetes; c__Bacteroidia; o__Bacteroidales; f__Muribaculaceae; g__uncultured bacterium; s__uncultured bacterium
OTU_138	8	2	1	0	0	1	21	15	0	1	0	0	0	k__Bacteria; p__Actinobacteria; c__Coriobacteriia; o__Coriobacteriales; f__Eggerthellaceae; g__Enterorhabdus; s__uncultured bacterium
OTU_1136	0	0	0	0	0	0	0	0	0	0	0	1	0	k__Bacteria; p__Firmicutes; c__Clostridia; o__Clostridiales; f__Ruminococcaceae; g__Ruminococcaceae UCG-009; s__uncultured bacterium
OTU_1181	0	6	0	0	0	1	0	0	0	0	0	0	4	k__Bacteria; p__Firmicutes; c__Clostridia; o__Clostridiales; f__Lachnospiraceae; g__GCA-900066575; s__uncultured bacterium
OTU_2156	25	0	9	0	4	6	0	1	1	2	0	0	0	k__Bacteria; p__Firmicutes; c__Clostridia; o__Clostridiales; f__Ruminococcaceae; g__Ruminococcaceae UCG-010; s__uncultured rumen bacterium
OTU_275	2	33	2	1	3	6	0	0	5	4	3	0	1	k__Bacteria; p__Firmicutes; c__Clostridia; o__Clostridiales; f__Lachnospiraceae
OTU_2884	0	2	0	2	1	1	0	0	0	0	2	1	2	k__Bacteria; p__Bacteroidetes; c__Bacteroidia; o__Bacteroidales; f__Muribaculaceae; g__uncultured bacterium; s__uncultured bacterium
OTU_2466	4	0	10	1	1	0	0	0	1	19	0	20	9	k__Bacteria; p__Bacteroidetes; c__Bacteroidia; o__Bacteroidales
OTU_264	1	30	1	0	1	5	0	0	2	0	0	0	1	k__Bacteria; p__Firmicutes; c__Clostridia; o__Clostridiales; f__Peptococcaceae; g__Peptococcus; s__uncultured bacterium
OTU_539	2	2	0	1	1	0	0	0	2	0	2	0	4	k__Bacteria; p__Firmicutes; c__Negativicutes; o__Selenomonadales; f__Veillonellaceae; g__Negativicoccus; s__Tissierellia bacterium S5-A11
OTU_182	7	0	3	0	5	0	0	1	102	0	10	1	0	k__Bacteria; p__Firmicutes; c__Clostridia; o__Clostridiales; f__Ruminococcaceae
OTU_1676	0	0	2	0	0	0	0	0	0	3	1	21	6	k__Bacteria; p__Bacteroidetes; c__Bacteroidia; o__Bacteroidales; f__Muribaculaceae; g__uncultured bacterium; s__uncultured bacterium
OTU_694	0	1	0	0	3	0	0	0	1	0	0	0	0	k__Bacteria; p__Firmicutes; c__Clostridia; o__Clostridiales; f__Ruminococcaceae; g__Ruminococcaceae UCG-010; s__uncultured bacterium
OTU_552	1	2	18	0	0	4	0	16	1	0	0	0	1	k__Bacteria; p__Firmicutes; c__Clostridia; o__Clostridiales; f__Ruminococcaceae; g__Ruminococcaceae UCG-014
OTU_686	0	10	0	0	0	3	3	0	1	4	0	0	0	k__Bacteria; p__Firmicutes; c__Clostridia; o__Clostridiales; f__Ruminococcaceae; g__Harryflintia; s__uncultured bacterium
OTU_236	1	0	0	45	8	3	5	3	3	1	4	0	0	k__Bacteria; p__Firmicutes; c__Clostridia; o__Clostridiales; f__Ruminococcaceae; g__Butyricicoccus; s__uncultured bacterium
OTU_841	0	0	0	0	0	0	3	0	0	0	0	0	0	k__Bacteria; p__Firmicutes; c__Clostridia; o__Clostridiales; f__Lachnospiraceae
OTU_955	0	0	0	0	0	0	0	0	0	0	0	0	0	k__Bacteria; p__Firmicutes; c__Bacilli; o__Lactobacillales; f__Lactobacillaceae; g__Lactobacillus
OTU_819	0	0	0	1	0	0	0	0	1	0	0	1	0	k__Bacteria; p__Firmicutes; c__Clostridia; o__Clostridiales; f__Family XI; g__Peptoniphilus
OTU_366	0	1	1	0	1	2	0	0	0	4	3	5	2	k__Bacteria; p__Firmicutes; c__Clostridia; o__Clostridiales; f__Ruminococcaceae
OTU_133	0	0	0	1	0	0	83	15	2	74	3	2	2	k__Bacteria; p__Proteobacteria; c__Deltaproteobacteria; o__Desulfovibrionales; f__Desulfovibrionaceae; g__uncultured; s__uncultured bacterium
OTU_1337	0	0	3	0	0	1	0	0	4	0	0	2	0	k__Bacteria; p__Firmicutes; c__Clostridia; o__Clostridiales; f__Clostridiales vadinBB60 group; g__uncultured bacterium; s__uncultured bacterium
OTU_1963	0	5	0	0	0	0	0	0	0	0	0	0	5	k__Bacteria; p__Firmicutes; c__Clostridia; o__Clostridiales; f__Lachnospiraceae
OTU_663	0	0	0	0	0	0	0	0	0	0	0	0	0	k__Bacteria; p__Firmicutes; c__Clostridia; o__Clostridiales; f__Lachnospiraceae
OTU_27	0	0	0	3	0	0	8	26	1	0	0	0	0	k__Bacteria; p__Proteobacteria; c__Alphaproteobacteria; o__Sphingomonadales; f__Sphingomonadaceae; g__Novosphingobium
OTU_2240	1	1	1	0	0	0	0	0	0	0	1	0	0	k__Bacteria
OTU_2683	6	0	2	4	3	7	0	0	0	10	0	0	3	k__Bacteria; p__Bacteroidetes; c__Bacteroidia; o__Bacteroidales
OTU_2609	0	0	0	0	0	0	0	0	0	0	0	0	0	k__Bacteria; p__Bacteroidetes; c__Bacteroidia; o__Bacteroidales; f__Muribaculaceae; g__uncultured bacterium; s__uncultured bacterium
OTU_1529	0	0	0	2	0	0	0	0	0	1	1	2	9	k__Bacteria; p__Bacteroidetes; c__Bacteroidia; o__Bacteroidales
OTU_2009	0	1	0	0	0	1	1	0	0	3	0	0	1	k__Bacteria; p__Firmicutes; c__Clostridia; o__Clostridiales; f__Ruminococcaceae; g__Ruminiclostridium 5; s__uncultured bacterium
OTU_242	0	0	3	2	2	9	23	1	1	0	0	0	4	k__Bacteria; p__Proteobacteria; c__Gammaproteobacteria; o__Pseudomonadales; f__Pseudomonadaceae; g__Pseudomonas
OTU_1763	0	0	0	0	0	0	0	0	0	0	0	0	0	k__Bacteria; p__Firmicutes; c__Bacilli; o__Lactobacillales; f__Lactobacillaceae; g__Lactobacillus
OTU_2873	0	0	0	0	0	0	0	0	0	0	0	0	0	k__Bacteria; p__Bacteroidetes; c__Bacteroidia; o__Bacteroidales; f__Muribaculaceae; g__uncultured bacterium; s__uncultured bacterium
OTU_2525	0	0	0	0	0	0	3	1	0	0	0	0	0	k__Bacteria; p__Firmicutes; c__Bacilli; o__Lactobacillales; f__Streptococcaceae; g__Streptococcus; s__Streptococcus gallolyticus subsp. macedonicus
OTU_1828	0	0	0	0	0	0	0	0	0	0	0	0	0	k__Bacteria; p__Bacteroidetes; c__Bacteroidia; o__Bacteroidales; f__Muribaculaceae
OTU_2736	1	0	0	0	1	1	0	0	0	1	0	0	0	k__Bacteria; p__Bacteroidetes; c__Bacteroidia; o__Bacteroidales; f__Muribaculaceae; g__uncultured bacterium; s__uncultured bacterium
OTU_245	0	16	0	0	1	13	7	0	0	2	0	0	1	k__Bacteria; p__Firmicutes; c__Clostridia; o__Clostridiales; f__Ruminococcaceae; g__Ruminococcaceae UCG-009
OTU_1125	0	0	0	0	0	4	0	8	0	2	0	1	1	k__Bacteria; p__Firmicutes; c__Clostridia; o__Clostridiales; f__Lachnospiraceae; g__uncultured; s__uncultured bacterium
OTU_1779	0	4	0	2	0	3	0	0	0	0	0	0	1	k__Bacteria; p__Firmicutes; c__Clostridia; o__Clostridiales; f__Ruminococcaceae; g__Ruminiclostridium 9; s__uncultured bacterium
OTU_2784	0	0	0	0	0	0	0	0	0	0	0	0	0	k__Bacteria; p__Bacteroidetes; c__Bacteroidia; o__Bacteroidales; f__Muribaculaceae; g__uncultured bacterium; s__uncultured bacterium
OTU_2169	0	0	2	0	0	0	0	0	0	0	0	0	0	k__Bacteria
OTU_1049	0	0	0	0	1	2	0	3	2	4	1	1	5	k__Bacteria; p__Bacteroidetes; c__Bacteroidia; o__Bacteroidales; f__Prevotellaceae; g__Prevotella
OTU_2896	0	0	0	0	0	1	0	0	0	0	0	0	0	k__Bacteria; p__Firmicutes; c__Clostridia; o__Clostridiales; f__Lachnospiraceae
OTU_119	0	0	0	0	0	0	2	0	0	0	0	0	0	k__Bacteria; p__Proteobacteria; c__Alphaproteobacteria; o__Caulobacterales; f__Caulobacteraceae; g__Caulobacter; s__uncultured bacterium
OTU_1366	0	0	1	0	0	0	0	0	0	3	0	5	1	k__Bacteria; p__Bacteroidetes; c__Bacteroidia; o__Bacteroidales; f__Bacteroidaceae; g__Bacteroides; s__human gut metagenome
OTU_1635	0	0	0	0	0	0	0	0	0	0	0	0	0	k__Bacteria; p__Firmicutes; c__Erysipelotrichia; o__Erysipelotrichales; f__Erysipelotrichaceae; g__Faecalibaculum; s__Faecalibaculum rodentium
OTU_1712	0	8	1	2	0	5	0	0	0	0	0	0	0	k__Bacteria; p__Firmicutes; c__Clostridia; o__Clostridiales; f__Ruminococcaceae
OTU_227	1	0	0	0	0	0	4	0	0	0	0	58	0	k__Bacteria; p__Bacteroidetes; c__Bacteroidia; o__Bacteroidales; f__Rikenellaceae; g__Alistipes
OTU_1161	0	11	20	0	0	11	0	0	0	20	0	0	0	k__Bacteria; p__Firmicutes; c__Clostridia; o__Clostridiales; f__Clostridiales vadinBB60 group; g__uncultured bacterium; s__uncultured bacterium
OTU_724	0	0	0	0	1	0	0	0	0	0	0	0	0	k__Bacteria; p__Actinobacteria; c__Coriobacteriia; o__Coriobacteriales; f__Eggerthellaceae; g__Enterorhabdus; s__uncultured bacterium
OTU_57	3	0	3	9	1	0	199	4	0	0	4	9	0	k__Bacteria; p__Bacteroidetes; c__Bacteroidia; o__Bacteroidales; f__Tannerellaceae; g__Parabacteroides
OTU_1584	0	0	0	0	0	2	1	0	0	0	0	0	0	k__Bacteria; p__Firmicutes; c__Clostridia; o__Clostridiales; f__Lachnospiraceae
OTU_972	0	0	0	1	0	0	0	1	0	0	1	1	0	k__Bacteria; p__Proteobacteria; c__Gammaproteobacteria; o__Pseudomonadales; f__Moraxellaceae; g__Enhydrobacter; s__uncultured bacterium
OTU_2551	0	6	0	0	0	6	1	0	0	0	0	0	1	k__Bacteria; p__Firmicutes; c__Clostridia; o__Clostridiales; f__Ruminococcaceae; g__Intestinimonas; s__uncultured bacterium
OTU_244	0	1	0	0	0	0	7	1	0	0	0	0	0	k__Bacteria; p__Firmicutes; c__Clostridia; o__Clostridiales; f__Ruminococcaceae
OTU_341	0	0	8	0	1	4	0	1	0	1	3	6	0	k__Bacteria; p__Firmicutes; c__Clostridia; o__Clostridiales; f__Lachnospiraceae; g__A2; s__uncultured bacterium
OTU_254	3	0	0	1	0	0	1	0	2	1	1	0	2	k__Bacteria; p__Firmicutes; c__Clostridia; o__Clostridiales; f__Lachnospiraceae; g__Blautia; s__uncultured organism
OTU_322	0	5	0	1	1	7	0	7	0	0	1	0	0	k__Bacteria; p__Firmicutes; c__Clostridia; o__Clostridiales; f__Lachnospiraceae; g__A2; s__uncultured bacterium
OTU_569	0	8	3	7	1	1	0	1	10	5	0	4	0	k__Bacteria; p__Firmicutes; c__Clostridia; o__Clostridiales; f__Clostridiales vadinBB60 group; g__uncultured bacterium; s__uncultured bacterium
OTU_734	0	7	9	0	0	0	0	0	0	0	0	0	0	k__Bacteria; p__Firmicutes; c__Clostridia; o__Clostridiales; f__Ruminococcaceae; g__Ruminococcaceae UCG-014
OTU_255	0	0	1	0	0	0	0	0	2	0	0	0	0	k__Bacteria; p__Actinobacteria; c__Coriobacteriia; o__Coriobacteriales; f__Coriobacteriaceae; g__Collinsella; s__uncultured bacterium
OTU_1883	0	0	0	0	0	0	0	0	0	0	0	0	0	k__Bacteria; p__Bacteroidetes; c__Bacteroidia; o__Bacteroidales; f__Muribaculaceae
OTU_1858	0	0	0	0	0	0	0	0	0	0	0	0	0	k__Bacteria; p__Bacteroidetes; c__Bacteroidia; o__Bacteroidales; f__Muribaculaceae
OTU_155	2	6	2	3	3	0	24	59	0	1	13	1	0	k__Bacteria; p__Actinobacteria; c__Coriobacteriia; o__Coriobacteriales; f__Eggerthellaceae; g__Enterorhabdus; s__uncultured bacterium
OTU_407	0	10	0	0	0	6	0	0	0	0	0	1	1	k__Bacteria; p__Firmicutes; c__Clostridia; o__Clostridiales; f__Ruminococcaceae; g__Ruminiclostridium
OTU_2372	0	0	0	0	0	0	0	0	0	0	0	0	0	k__Bacteria; p__Firmicutes; c__Clostridia; o__Clostridiales; f__Lachnospiraceae
OTU_310	2	11	0	0	0	0	0	2	2	0	0	1	0	k__Bacteria; p__Firmicutes; c__Clostridia; o__Clostridiales; f__Lachnospiraceae; g__GCA-900066575; s__uncultured bacterium
OTU_650	0	2	0	2	1	1	0	0	0	2	3	4	5	k__Bacteria; p__Actinobacteria; c__Actinobacteria; o__Actinomycetales; f__Actinomycetaceae; g__Mobiluncus; s__Mobiluncus curtisii subsp. curtisii ATCC 35241
OTU_1462	0	0	0	0	0	0	0	0	0	0	0	0	0	k__Bacteria; p__Firmicutes; c__Bacilli; o__Bacillales; f__Bacillaceae; g__Anoxybacillus; s__uncultured bacterium
OTU_2350	0	0	1	2	0	1	0	0	0	6	0	2	3	k__Bacteria; p__Bacteroidetes; c__Bacteroidia; o__Bacteroidales
OTU_1629	0	1	1	2	1	4	0	0	0	0	0	3	0	k__Bacteria; p__Firmicutes; c__Clostridia; o__Clostridiales; f__Clostridiales vadinBB60 group; g__uncultured bacterium; s__uncultured bacterium
OTU_293	0	3	1	0	2	7	2	2	4	7	0	1	2	k__Bacteria; p__Firmicutes; c__Clostridia; o__Clostridiales; f__Lachnospiraceae; g__uncultured; s__uncultured bacterium
OTU_1176	0	0	5	0	14	0	0	0	0	0	4	0	1	k__Bacteria; p__Bacteroidetes; c__Bacteroidia; o__Bacteroidales; f__Muribaculaceae; g__uncultured bacterium; s__uncultured bacterium
OTU_1628	0	0	0	0	0	0	0	0	0	0	0	0	0	k__Bacteria; p__Bacteroidetes; c__Bacteroidia; o__Bacteroidales; f__Muribaculaceae; g__uncultured bacterium; s__uncultured bacterium
OTU_294	0	0	0	0	0	0	0	0	0	17	0	0	0	k__Bacteria; p__Firmicutes; c__Clostridia; o__Clostridiales; f__Lachnospiraceae
OTU_2937	0	0	1	0	0	0	0	0	0	0	1	0	0	k__Bacteria; p__Bacteroidetes; c__Bacteroidia; o__Bacteroidales; f__Muribaculaceae
OTU_962	0	0	0	0	0	0	0	0	0	0	0	0	1	k__Bacteria; p__Tenericutes; c__Mollicutes; o__Mollicutes RF39; f__uncultured bacterium; g__uncultured bacterium; s__uncultured bacterium
OTU_501	0	0	0	3	1	2	0	0	4	3	0	1	0	k__Bacteria; p__Firmicutes; c__Clostridia; o__Clostridiales; f__Ruminococcaceae
OTU_630	0	0	0	8	0	1	0	0	2	0	0	1	0	k__Bacteria; p__Firmicutes; c__Clostridia; o__Clostridiales; f__Clostridiales vadinBB60 group; g__uncultured bacterium; s__uncultured bacterium
OTU_66	0	0	5	111	9	40	8	0	2	15	0	11	16	k__Bacteria; p__Deferribacteres; c__Deferribacteres; o__Deferribacterales; f__Deferribacteraceae; g__Mucispirillum; s__Mucispirillum schaedleri ASF457
OTU_1316	0	0	1	0	0	0	0	0	0	0	0	0	2	k__Bacteria; p__Bacteroidetes; c__Bacteroidia; o__Bacteroidales; f__Muribaculaceae; g__uncultured bacterium; s__uncultured bacterium
OTU_570	0	0	0	0	0	7	0	0	0	0	0	0	0	k__Bacteria; p__Firmicutes; c__Clostridia; o__Clostridiales; f__Lachnospiraceae
OTU_904	1	0	0	1	0	1	41	4	0	1	1	3	1	k__Bacteria; p__Bacteroidetes; c__Bacteroidia; o__Bacteroidales; f__Bacteroidaceae; g__Bacteroides
OTU_1174	6	2	4	0	4	1	2	0	0	4	1	5	1	k__Bacteria; p__Bacteroidetes; c__Bacteroidia; o__Bacteroidales
OTU_1301	0	1	1	0	0	0	1	2	0	0	0	1	3	k__Bacteria; p__Firmicutes; c__Clostridia; o__Clostridiales; f__Lachnospiraceae; g__Roseburia
OTU_530	0	0	0	0	0	0	0	0	0	0	0	1	3	k__Bacteria; p__Firmicutes; c__Clostridia; o__Clostridiales; f__Ruminococcaceae; g__Butyricicoccus; s__uncultured bacterium
OTU_2878	0	0	0	0	0	0	0	0	0	0	0	0	0	k__Bacteria
OTU_1025	0	0	0	0	0	0	0	0	0	0	0	0	0	k__Bacteria; p__Firmicutes; c__Clostridia; o__Clostridiales; f__Ruminococcaceae
OTU_93	0	0	0	1	1	1	5	6	0	0	0	0	0	k__Bacteria; p__Proteobacteria; c__Alphaproteobacteria; o__Caulobacterales; f__Caulobacteraceae; g__Brevundimonas; s__uncultured bacterium
OTU_493	45	0	1	0	0	2	0	0	0	0	0	0	0	k__Bacteria; p__Firmicutes; c__Erysipelotrichia; o__Erysipelotrichales; f__Erysipelotrichaceae; g__Dubosiella; s__uncultured bacterium
OTU_296	0	13	3	0	0	2	0	1	0	2	0	0	0	k__Bacteria; p__Firmicutes; c__Clostridia; o__Clostridiales; f__Lachnospiraceae
OTU_128	0	200	3	0	0	0	0	77	0	0	0	0	0	k__Bacteria; p__Firmicutes; c__Clostridia; o__Clostridiales; f__Ruminococcaceae; g__Ruminococcaceae UCG-014; s__uncultured rumen bacterium
OTU_301	0	0	0	0	0	0	7	0	0	0	0	0	0	k__Bacteria; p__Firmicutes; c__Clostridia; o__Clostridiales; f__Lachnospiraceae
OTU_1422	0	0	0	0	0	0	0	0	0	0	0	0	0	k__Bacteria; p__Bacteroidetes; c__Bacteroidia; o__Bacteroidales
OTU_2888	0	0	0	0	0	0	0	0	1	0	0	0	0	k__Bacteria; p__Bacteroidetes; c__Bacteroidia; o__Bacteroidales; f__Muribaculaceae; g__uncultured bacterium; s__uncultured bacterium
OTU_2552	0	0	0	0	0	0	0	0	0	0	0	0	0	k__Bacteria; p__Bacteroidetes; c__Bacteroidia; o__Bacteroidales; f__Muribaculaceae; g__uncultured bacterium; s__uncultured bacterium
OTU_434	0	0	0	0	0	0	0	0	0	0	0	0	0	k__Bacteria; p__Bacteroidetes; c__Bacteroidia; o__Bacteroidales; f__Bacteroidaceae; g__Bacteroides
OTU_2017	1	0	2	0	0	0	0	0	0	1	1	0	4	k__Bacteria; p__Bacteroidetes; c__Bacteroidia; o__Bacteroidales; f__Muribaculaceae; g__uncultured bacterium; s__uncultured bacterium
OTU_1237	0	1	0	0	0	13	1	0	0	1	0	0	0	k__Bacteria; p__Firmicutes; c__Clostridia; o__Clostridiales; f__Lachnospiraceae
OTU_1421	0	0	0	0	0	0	0	0	0	0	0	0	0	k__Bacteria; p__Firmicutes; c__Clostridia; o__Clostridiales; f__Lachnospiraceae; g__Lachnospiraceae NK4A136 group
OTU_321	0	2	0	0	0	0	9	8	1	0	0	1	0	k__Bacteria; p__Bacteroidetes; c__Bacteroidia; o__Bacteroidales; f__Bacteroidaceae; g__Bacteroides
OTU_340	0	0	0	0	0	0	0	0	0	0	0	0	2	k__Bacteria; p__Firmicutes; c__Negativicutes; o__Selenomonadales; f__Veillonellaceae; g__Dialister; s__uncultured bacterium
OTU_1630	0	0	0	0	0	0	0	0	0	0	0	0	0	k__Bacteria
OTU_1015	0	0	0	3	0	0	0	1	0	2	2	1	1	k__Bacteria; p__Firmicutes; c__Clostridia; o__Clostridiales; f__Ruminococcaceae; g__GCA-900066225; s__uncultured bacterium
OTU_2984	0	0	0	0	0	0	0	0	0	0	0	0	0	k__Bacteria
OTU_478	0	0	1	0	0	0	0	1	0	0	0	1	0	k__Bacteria; p__Firmicutes; c__Clostridia; o__Clostridiales; f__Christensenellaceae; g__Christensenellaceae R-7 group; s__uncultured bacterium
OTU_345	0	26	0	0	0	0	3	0	0	0	0	0	0	k__Bacteria; p__Firmicutes; c__Clostridia; o__Clostridiales; f__Lachnospiraceae; g__Roseburia; s__uncultured bacterium
OTU_2881	3	0	2	1	2	0	0	0	0	1	0	1	0	k__Bacteria; p__Bacteroidetes; c__Bacteroidia; o__Bacteroidales; f__Muribaculaceae; g__uncultured bacterium; s__uncultured bacterium
OTU_2363	0	0	0	0	0	0	0	0	1	0	2	0	2	k__Bacteria; p__Bacteroidetes; c__Bacteroidia; o__Bacteroidales; f__Muribaculaceae; g__uncultured bacterium; s__uncultured bacterium
OTU_2305	0	0	0	0	0	0	0	0	1	0	0	0	0	k__Bacteria; p__Bacteroidetes; c__Bacteroidia; o__Bacteroidales; f__Muribaculaceae; g__uncultured bacterium; s__uncultured bacterium
OTU_676	1	0	1	0	0	0	1	0	0	0	0	0	1	k__Bacteria; p__Proteobacteria; c__Gammaproteobacteria; o__Betaproteobacteriales; f__Burkholderiaceae; g__Cupriavidus
OTU_507	0	0	0	1	0	0	20	1	1	0	0	1	0	k__Bacteria; p__Firmicutes; c__Clostridia; o__Clostridiales; f__Ruminococcaceae; g__Ruminococcus 2; s__uncultured bacterium
OTU_2877	0	0	0	0	0	0	0	0	0	0	0	0	0	k__Bacteria; p__Tenericutes; c__Mollicutes; o__Mollicutes RF39
OTU_2710	0	0	0	0	0	0	0	0	0	0	0	0	0	k__Bacteria; p__Bacteroidetes; c__Bacteroidia; o__Bacteroidales; f__Muribaculaceae
OTU_399	0	0	0	0	3	7	0	0	3	11	0	0	0	k__Bacteria; p__Firmicutes; c__Clostridia; o__Clostridiales; f__Ruminococcaceae
OTU_402	3	0	0	2	2	0	0	1	1	4	0	3	5	k__Bacteria; p__Actinobacteria; c__Actinobacteria; o__Actinomycetales; f__Actinomycetaceae; g__Actinomyces; s__Actinomyces neuii BVS029A5
OTU_2833	0	0	0	0	0	0	0	0	0	0	0	0	0	k__Bacteria; p__Bacteroidetes; c__Bacteroidia; o__Bacteroidales; f__Muribaculaceae; g__uncultured bacterium; s__uncultured bacterium
OTU_1403	1	2	22	0	25	0	0	0	0	0	0	0	0	k__Bacteria; p__Bacteroidetes; c__Bacteroidia; o__Bacteroidales; f__Muribaculaceae; g__uncultured bacterium; s__uncultured bacterium
OTU_312	2	0	0	3	0	0	5	0	1	1	0	3	0	k__Bacteria; p__Bacteroidetes; c__Bacteroidia; o__Bacteroidales; f__Bacteroidaceae; g__Bacteroides; s__unidentified
OTU_1818	0	0	1	0	0	0	0	0	1	0	0	0	0	k__Bacteria; p__Bacteroidetes; c__Bacteroidia; o__Bacteroidales; f__Muribaculaceae; g__uncultured bacterium; s__uncultured bacterium
OTU_1259	1	0	3	2	1	1	0	0	1	11	5	5	30	k__Bacteria; p__Bacteroidetes; c__Bacteroidia; o__Bacteroidales; f__Muribaculaceae
OTU_418	0	0	1	1	0	0	12	13	0	0	0	6	1	k__Bacteria; p__Firmicutes; c__Clostridia; o__Clostridiales; f__Lachnospiraceae; g__Agathobacter
OTU_129	4	6	11	1	9	1	4	16	3	26	1	11	0	k__Bacteria; p__Bacteroidetes; c__Bacteroidia; o__Bacteroidales; f__Muribaculaceae; g__uncultured bacterium; s__uncultured bacterium
OTU_2062	0	0	0	0	0	3	0	0	0	0	0	0	0	k__Bacteria; p__Firmicutes; c__Clostridia; o__Clostridiales
OTU_401	0	0	0	19	1	1	0	0	0	1	0	0	0	k__Bacteria; p__Firmicutes; c__Clostridia; o__Clostridiales; f__Clostridiales vadinBB60 group; g__uncultured bacterium; s__uncultured bacterium
OTU_1516	0	6	0	2	0	3	0	0	0	0	0	0	2	k__Bacteria; p__Firmicutes; c__Clostridia; o__Clostridiales; f__Lachnospiraceae
OTU_1253	0	0	0	0	0	1	0	0	0	0	0	0	0	k__Bacteria; p__Tenericutes; c__Mollicutes; o__Mollicutes RF39; f__uncultured bacterium; g__uncultured bacterium; s__uncultured bacterium
OTU_202	0	0	0	0	0	0	0	0	0	0	0	0	0	k__Bacteria; p__Firmicutes; c__Negativicutes; o__Selenomonadales; f__Veillonellaceae; g__Megasphaera; s__uncultured bacterium
OTU_273	2	29	10	6	2	9	0	0	3	0	4	1	0	k__Bacteria; p__Firmicutes; c__Clostridia; o__Clostridiales; f__Clostridiales vadinBB60 group; g__uncultured bacterium; s__uncultured bacterium
OTU_1248	0	0	0	0	0	0	0	0	0	0	0	0	0	k__Bacteria; p__Firmicutes; c__Clostridia; o__Clostridiales; f__Ruminococcaceae
OTU_1964	0	0	1	1	0	2	0	0	0	0	0	0	1	k__Bacteria; p__Bacteroidetes; c__Bacteroidia; o__Bacteroidales
OTU_1189	0	0	0	0	0	0	0	0	0	0	0	0	0	k__Bacteria; p__Tenericutes; c__Mollicutes; o__Mollicutes RF39
OTU_2764	0	0	0	0	0	0	0	0	0	0	0	0	0	k__Bacteria; p__Bacteroidetes; c__Bacteroidia; o__Bacteroidales
OTU_1103	2	1	1	0	1	0	0	0	1	0	0	4	0	k__Bacteria; p__Bacteroidetes; c__Bacteroidia; o__Bacteroidales; f__Muribaculaceae; g__uncultured bacterium; s__uncultured bacterium
OTU_352	0	0	0	0	0	0	0	0	0	0	0	0	0	k__Bacteria; p__Proteobacteria; c__Gammaproteobacteria; o__Enterobacteriales; f__Enterobacteriaceae; g__Proteus; s__Proteus mirabilis
OTU_270	0	0	0	0	0	1	7	4	0	0	1	0	3	k__Bacteria; p__Firmicutes; c__Clostridia; o__Clostridiales; f__Lachnospiraceae; g__[Eubacterium] eligens group; s__uncultured bacterium
OTU_1102	0	0	0	0	0	0	0	0	0	0	0	0	0	k__Bacteria; p__Firmicutes; c__Clostridia; o__Clostridiales; f__Christensenellaceae; g__Christensenellaceae R-7 group; s__uncultured organism
OTU_25	2	1	83	61	66	0	413	183	372	21	225	1	0	k__Bacteria; p__Bacteroidetes; c__Bacteroidia; o__Bacteroidales; f__Muribaculaceae; g__uncultured organism; s__uncultured organism
OTU_1413	0	0	0	0	0	0	0	0	0	0	0	0	0	k__Bacteria; p__Tenericutes; c__Mollicutes; o__Mollicutes RF39
OTU_2202	0	0	0	0	0	0	0	0	1	0	0	0	0	k__Bacteria; p__Bacteroidetes; c__Bacteroidia; o__Bacteroidales; f__Muribaculaceae; g__uncultured bacterium; s__uncultured bacterium
OTU_91	0	0	0	0	0	0	0	0	0	0	0	0	0	k__Bacteria; p__Proteobacteria; c__Gammaproteobacteria; o__Betaproteobacteriales; f__Burkholderiaceae; g__Ralstonia; s__uncultured Ralstonia sp.
OTU_354	1	0	0	0	0	0	10	3	0	0	0	0	0	k__Bacteria; p__Deinococcus-Thermus; c__Deinococci; o__Thermales; f__Thermaceae; g__Thermus; s__uncultured Thermus sp.
OTU_314	0	1	1	0	0	0	1	0	2	0	0	0	2	k__Bacteria; p__Firmicutes; c__Clostridia; o__Clostridiales; f__Lachnospiraceae; g__[Ruminococcus] torques group; s__uncultured organism
OTU_97	0	42	13	0	0	27	0	0	0	0	1	0	0	k__Bacteria; p__Firmicutes; c__Clostridia; o__Clostridiales; f__Ruminococcaceae; g__Anaerotruncus; s__uncultured bacterium
OTU_2774	0	0	0	0	0	0	0	0	0	0	0	0	0	k__Bacteria; p__Firmicutes; c__Clostridia; o__Clostridiales; f__Lachnospiraceae; g__Dorea; s__Dorea formicigenerans ATCC 27755
OTU_171	0	6	0	0	0	1	1	10	0	1	0	0	0	k__Bacteria; p__Firmicutes; c__Clostridia; o__Clostridiales; f__Lachnospiraceae; g__[Eubacterium] ventriosum group; s__uncultured bacterium
OTU_125	37	150	2	3	4	5	4	0	2	0	0	0	0	k__Bacteria; p__Firmicutes; c__Clostridia; o__Clostridiales; f__Lachnospiraceae
OTU_229	0	12	0	0	3	7	0	4	0	1	5	0	0	k__Bacteria; p__Firmicutes; c__Clostridia; o__Clostridiales; f__Ruminococcaceae; g__Anaerotruncus; s__uncultured bacterium
OTU_2346	0	3	0	0	0	1	2	0	0	5	0	3	3	k__Bacteria; p__Firmicutes; c__Clostridia; o__Clostridiales; f__Ruminococcaceae; g__Ruminiclostridium 5; s__uncultured bacterium
OTU_1504	2	1	6	3	16	3	0	0	4	9	3	20	6	k__Bacteria; p__Bacteroidetes; c__Bacteroidia; o__Bacteroidales
OTU_2043	0	0	0	0	0	0	0	0	0	0	0	0	0	k__Bacteria; p__Bacteroidetes; c__Bacteroidia; o__Bacteroidales; f__Muribaculaceae; g__uncultured bacterium; s__uncultured bacterium
OTU_1279	0	0	0	0	0	0	0	0	0	0	0	0	0	k__Bacteria; p__Firmicutes; c__Clostridia; o__Clostridiales; f__Lachnospiraceae
OTU_831	0	0	0	0	0	0	0	0	0	0	0	0	0	k__Bacteria; p__Tenericutes; c__Mollicutes; o__Mollicutes RF39
OTU_2753	0	0	0	0	0	0	0	0	0	0	0	0	0	k__Bacteria; p__Firmicutes; c__Clostridia; o__Clostridiales
OTU_2480	0	1	1	0	0	1	0	0	0	4	0	2	0	k__Bacteria; p__Bacteroidetes; c__Bacteroidia; o__Bacteroidales
OTU_1010	0	0	0	3	0	1	0	0	0	0	0	0	0	k__Bacteria; p__Firmicutes; c__Clostridia; o__Clostridiales; f__Lachnospiraceae
OTU_1469	0	0	0	0	0	0	0	0	0	0	0	0	0	k__Bacteria; p__Firmicutes; c__Clostridia; o__Clostridiales; f__Clostridiales vadinBB60 group; g__uncultured bacterium; s__uncultured bacterium
OTU_211	0	53	0	0	0	0	0	14	0	0	0	0	6	k__Bacteria; p__Firmicutes; c__Clostridia; o__Clostridiales; f__Ruminococcaceae; g__Ruminococcaceae UCG-014; s__uncultured bacterium
OTU_749	0	0	0	0	0	0	0	0	0	0	0	0	0	k__Bacteria
OTU_1266	0	0	0	0	0	0	0	0	0	0	0	0	0	k__Bacteria; p__Bacteroidetes; c__Bacteroidia; o__Bacteroidales; f__Muribaculaceae
OTU_241	0	3	0	0	0	4	21	3	0	1	0	0	2	k__Bacteria; p__Firmicutes; c__Clostridia; o__Clostridiales; f__Ruminococcaceae; g__Ruminiclostridium; s__uncultured bacterium
OTU_1598	0	0	0	0	0	0	0	0	1	1	0	2	3	k__Bacteria; p__Bacteroidetes; c__Bacteroidia; o__Bacteroidales
OTU_952	0	0	2	0	0	0	0	0	0	2	1	0	0	k__Bacteria; p__Bacteroidetes; c__Bacteroidia; o__Bacteroidales; f__Muribaculaceae
OTU_2088	0	0	0	0	0	1	0	0	0	0	0	0	0	k__Bacteria; p__Firmicutes; c__Clostridia; o__Clostridiales; f__Ruminococcaceae
OTU_1570	0	1	7	0	0	5	0	0	0	0	0	0	0	k__Bacteria; p__Firmicutes; c__Clostridia; o__Clostridiales; f__Lachnospiraceae; g__Lachnospiraceae NK4A136 group; s__Lachnospiraceae bacterium COE1
OTU_356	0	2	0	13	0	1	0	0	2	1	0	5	2	k__Bacteria; p__Firmicutes; c__Clostridia; o__Clostridiales; f__Family XIII; g__[Eubacterium] brachy group; s__uncultured bacterium
OTU_2197	0	1	0	0	0	0	0	0	0	0	0	0	0	k__Bacteria; p__Bacteroidetes; c__Bacteroidia; o__Bacteroidales; f__Muribaculaceae
OTU_1709	0	0	0	0	0	0	0	0	0	0	0	0	0	k__Bacteria; p__Bacteroidetes; c__Bacteroidia; o__Bacteroidales; f__Muribaculaceae; g__uncultured bacterium; s__uncultured bacterium
OTU_1014	0	0	0	0	0	0	0	0	0	0	0	0	0	k__Bacteria; p__Firmicutes; c__Erysipelotrichia; o__Erysipelotrichales; f__Erysipelotrichaceae; g__Turicibacter; s__uncultured bacterium
OTU_2329	0	0	0	0	0	0	0	0	0	1	0	0	0	k__Bacteria
OTU_2413	11	0	1	0	2	2	0	0	0	1	0	1	7	k__Bacteria; p__Bacteroidetes; c__Bacteroidia; o__Bacteroidales; f__Muribaculaceae; g__uncultured bacterium; s__uncultured bacterium
OTU_2570	38	0	72	0	122	0	0	0	6	21	76	80	11	k__Bacteria; p__Bacteroidetes; c__Bacteroidia; o__Bacteroidales; f__Muribaculaceae; g__uncultured bacterium; s__uncultured bacterium
OTU_1903	25	0	4	33	6	91	0	0	0	26	8	7	2	k__Bacteria; p__Bacteroidetes; c__Bacteroidia; o__Bacteroidales; f__Bacteroidaceae; g__Bacteroides; s__Bacteroides acidifaciens
OTU_1419	0	0	3	0	0	0	0	0	2	1	5	8	4	k__Bacteria; p__Bacteroidetes; c__Bacteroidia; o__Bacteroidales; f__Muribaculaceae; g__uncultured bacterium; s__uncultured bacterium
OTU_1002	1	0	0	0	0	0	0	1	0	0	0	0	0	k__Bacteria; p__Firmicutes; c__Clostridia; o__Clostridiales; f__Family XI; g__Peptoniphilus
OTU_1604	0	0	0	0	0	1	0	7	2	0	0	0	0	k__Bacteria; p__Actinobacteria; c__Coriobacteriia; o__Coriobacteriales; f__Eggerthellaceae; g__Enterorhabdus; s__uncultured bacterium
OTU_111	1	1	3	0	3	1	0	13	0	0	0	0	0	k__Bacteria; p__Firmicutes; c__Clostridia; o__Clostridiales; f__Ruminococcaceae; g__Ruminococcaceae UCG-014
OTU_1483	0	0	0	0	0	0	0	0	0	0	0	0	0	k__Bacteria; p__Bacteroidetes; c__Bacteroidia; o__Bacteroidales; f__Muribaculaceae; g__uncultured bacterium; s__uncultured bacterium
OTU_1036	0	0	0	0	0	0	0	3	0	0	0	0	0	k__Bacteria; p__Firmicutes; c__Clostridia; o__Clostridiales; f__Ruminococcaceae; g__Ruminococcaceae UCG-014; s__uncultured rumen bacterium
OTU_1583	0	0	0	0	0	0	0	0	0	0	0	0	0	k__Bacteria; p__Bacteroidetes; c__Bacteroidia; o__Bacteroidales; f__Muribaculaceae; g__uncultured bacterium; s__uncultured bacterium
OTU_2590	1	2	0	0	0	2	0	0	0	0	0	3	2	k__Bacteria; p__Bacteroidetes; c__Bacteroidia; o__Bacteroidales
OTU_261	0	3	8	0	0	71	0	16	1	0	0	0	2	k__Bacteria; p__Firmicutes; c__Clostridia; o__Clostridiales; f__Ruminococcaceae; g__Ruminococcaceae UCG-014; s__uncultured bacterium
OTU_1409	2	0	8	0	2	0	0	0	1	6	0	9	6	k__Bacteria; p__Bacteroidetes; c__Bacteroidia; o__Bacteroidales; f__Muribaculaceae; g__uncultured bacterium; s__uncultured bacterium
OTU_1254	10	0	6	0	0	0	0	0	0	0	5	7	1	k__Bacteria; p__Bacteroidetes; c__Bacteroidia; o__Bacteroidales; f__Muribaculaceae; g__uncultured bacterium; s__uncultured bacterium
OTU_2512	0	1	0	0	0	0	1	0	0	0	0	0	0	k__Bacteria; p__Bacteroidetes; c__Bacteroidia; o__Bacteroidales; f__Muribaculaceae
OTU_1605	2	0	1	0	0	1	0	0	0	1	0	0	1	k__Bacteria; p__Bacteroidetes; c__Bacteroidia; o__Bacteroidales; f__Muribaculaceae; g__uncultured bacterium; s__uncultured bacterium
OTU_187	0	3	0	0	0	0	7	0	0	0	0	0	0	k__Bacteria; p__Bacteroidetes; c__Bacteroidia; o__Bacteroidales; f__Prevotellaceae; g__Prevotellaceae UCG-001; s__uncultured bacterium
OTU_77	12	5	1	5	0	0	27	3	686	0	0	77	2	k__Bacteria; p__Firmicutes; c__Clostridia; o__Clostridiales; f__Ruminococcaceae; g__Ruminiclostridium 5; s__uncultured bacterium
OTU_2496	3	0	1	0	0	0	0	0	0	3	1	10	5	k__Bacteria; p__Bacteroidetes; c__Bacteroidia; o__Bacteroidales
OTU_2151	0	0	0	0	0	0	0	0	0	1	0	0	0	k__Bacteria; p__Bacteroidetes; c__Bacteroidia; o__Bacteroidales; f__Muribaculaceae; g__uncultured bacterium; s__uncultured bacterium
OTU_196	0	38	1	0	1	0	0	0	0	1	1	0	13	k__Bacteria; p__Firmicutes; c__Clostridia; o__Clostridiales; f__Ruminococcaceae; g__GCA-900066225
OTU_2246	0	0	0	0	0	0	0	0	0	0	0	0	0	k__Bacteria; p__Bacteroidetes; c__Bacteroidia; o__Bacteroidales; f__Muribaculaceae; g__uncultured bacterium; s__uncultured bacterium
OTU_1284	0	0	0	0	0	0	0	0	0	0	0	1	0	k__Bacteria; p__Bacteroidetes; c__Bacteroidia; o__Bacteroidales; f__Muribaculaceae; g__uncultured bacterium; s__uncultured bacterium
OTU_284	0	6	4	0	0	4	2	30	0	3	0	0	0	k__Bacteria; p__Firmicutes; c__Clostridia; o__Clostridiales; f__Ruminococcaceae; g__Ruminococcaceae UCG-014; s__unidentified
OTU_1998	0	0	0	0	0	0	0	0	0	0	0	0	0	k__Bacteria; p__Bacteroidetes; c__Bacteroidia
OTU_364	0	4	2	8	3	12	0	0	0	6	1	0	0	k__Bacteria; p__Firmicutes; c__Clostridia; o__Clostridiales; f__Lachnospiraceae
OTU_1038	2	0	3	0	1	0	0	0	0	0	0	2	1	k__Bacteria; p__Bacteroidetes; c__Bacteroidia; o__Bacteroidales; f__Muribaculaceae; g__uncultured bacterium; s__uncultured bacterium
OTU_195	0	39	1	0	0	58	107	22	0	0	0	0	0	k__Bacteria; p__Firmicutes; c__Clostridia; o__Clostridiales; f__Lachnospiraceae
OTU_2424	0	0	1	0	0	0	0	0	0	0	0	0	0	k__Bacteria; p__Bacteroidetes; c__Bacteroidia; o__Bacteroidales; f__Muribaculaceae; g__uncultured bacterium; s__uncultured bacterium
OTU_2930	0	0	0	0	0	0	0	0	0	0	0	0	0	k__Bacteria; p__Firmicutes; c__Clostridia; o__Clostridiales
OTU_1458	3	3	3	0	3	0	0	0	0	0	0	54	60	k__Bacteria; p__Bacteroidetes; c__Bacteroidia; o__Bacteroidales; f__Muribaculaceae; g__uncultured bacterium; s__uncultured bacterium
OTU_2885	1	0	0	0	4	0	0	0	1	2	0	4	0	k__Bacteria; p__Bacteroidetes; c__Bacteroidia; o__Bacteroidales; f__Muribaculaceae; g__uncultured bacterium; s__uncultured bacterium
OTU_2820	0	0	0	0	0	0	0	0	0	0	0	0	0	k__Bacteria; p__Bacteroidetes; c__Bacteroidia; o__Bacteroidales; f__Muribaculaceae; g__uncultured bacterium; s__uncultured bacterium
OTU_1255	7	2	3	2	1	0	0	0	0	4	0	6	10	k__Bacteria; p__Bacteroidetes; c__Bacteroidia; o__Bacteroidales
OTU_337	0	0	7	2	0	0	0	18	10	5	0	2	10	k__Bacteria; p__Firmicutes; c__Erysipelotrichia; o__Erysipelotrichales; f__Erysipelotrichaceae; g__uncultured bacterium; s__uncultured bacterium
OTU_1226	0	0	0	0	1	0	0	0	0	0	0	0	0	k__Bacteria; p__Bacteroidetes; c__Bacteroidia; o__Bacteroidales; f__Bacteroidaceae; g__Bacteroides
OTU_682	0	2	1	0	3	2	4	0	0	0	1	1	1	k__Bacteria; p__Firmicutes; c__Clostridia; o__Clostridiales; f__Family XI; g__Anaerococcus; s__uncultured bacterium
OTU_2563	1	6	5	0	0	4	0	0	0	9	4	1	3	k__Bacteria; p__Bacteroidetes; c__Bacteroidia; o__Bacteroidales; f__Muribaculaceae; g__uncultured bacterium; s__uncultured bacterium
OTU_2650	8	7	3	3	0	0	0	0	0	1	0	1	0	k__Bacteria; p__Bacteroidetes; c__Bacteroidia; o__Bacteroidales; f__Muribaculaceae; g__uncultured bacterium; s__uncultured bacterium
OTU_263	0	0	0	0	0	0	0	2	1	0	1	0	0	k__Bacteria; p__Firmicutes; c__Clostridia; o__Clostridiales; f__Lachnospiraceae
OTU_2985	3	0	1	0	0	0	0	0	5	2	0	1	0	k__Bacteria; p__Bacteroidetes; c__Bacteroidia; o__Bacteroidales; f__Muribaculaceae; g__uncultured bacterium; s__uncultured bacterium
OTU_640	6	0	0	0	0	7	0	1	0	0	0	0	4	k__Bacteria; p__Firmicutes; c__Clostridia; o__Clostridiales; f__Ruminococcaceae; g__Ruminococcaceae UCG-014
OTU_381	0	0	0	0	0	0	32	0	0	0	0	0	2	k__Bacteria; p__Firmicutes; c__Clostridia; o__Clostridiales; f__Lachnospiraceae; g__Dorea; s__uncultured bacterium
OTU_1434	0	0	0	0	0	0	0	0	0	0	0	0	0	k__Bacteria; p__Bacteroidetes; c__Bacteroidia; o__Bacteroidales
OTU_319	0	2	0	0	0	3	17	6	0	1	1	0	0	k__Bacteria; p__Firmicutes; c__Negativicutes; o__Selenomonadales; f__Acidaminococcaceae; g__Phascolarctobacterium; s__uncultured organism
OTU_62	10	53	6	0	0	0	0	451	2	1	0	0	0	k__Bacteria; p__Firmicutes; c__Clostridia; o__Clostridiales; f__Ruminococcaceae; g__Ruminococcaceae UCG-014; s__uncultured rumen bacterium
OTU_1263	0	0	0	0	0	0	0	0	0	0	0	0	0	k__Bacteria
OTU_2677	0	0	1	0	0	0	0	0	1	0	0	1	0	k__Bacteria; p__Bacteroidetes; c__Bacteroidia; o__Bacteroidales; f__Muribaculaceae; g__uncultured bacterium; s__uncultured bacterium
OTU_2460	0	0	0	0	0	0	0	0	0	0	0	0	0	k__Bacteria; p__Bacteroidetes; c__Bacteroidia; o__Bacteroidales; f__Muribaculaceae; g__uncultured bacterium; s__uncultured bacterium
OTU_2208	1	0	2	1	0	0	0	0	0	3	0	3	3	k__Bacteria; p__Bacteroidetes; c__Bacteroidia; o__Bacteroidales; f__Muribaculaceae; g__uncultured bacterium; s__uncultured bacterium
OTU_1673	1	5	5	0	4	0	0	0	4	2	0	19	9	k__Bacteria; p__Bacteroidetes; c__Bacteroidia; o__Bacteroidales; f__Muribaculaceae; g__uncultured bacterium; s__uncultured bacterium
OTU_1657	0	0	1	0	0	0	0	0	3	0	0	0	0	k__Bacteria; p__Bacteroidetes; c__Bacteroidia; o__Bacteroidales; f__Muribaculaceae; g__uncultured bacterium; s__uncultured bacterium
OTU_2929	0	0	0	0	0	0	0	0	0	0	0	0	0	k__Bacteria; p__Bacteroidetes; c__Bacteroidia; o__Bacteroidales
OTU_2772	3	0	7	0	3	1	0	1	2	0	0	10	0	k__Bacteria; p__Bacteroidetes; c__Bacteroidia; o__Bacteroidales
OTU_1300	1	0	0	0	1	0	0	0	0	0	0	0	0	k__Bacteria; p__Bacteroidetes; c__Bacteroidia; o__Bacteroidales; f__Muribaculaceae; g__uncultured bacterium; s__uncultured bacterium
OTU_377	0	0	0	0	0	0	0	1	0	0	0	0	0	k__Bacteria; p__Proteobacteria; c__Gammaproteobacteria; o__Betaproteobacteriales; f__Burkholderiaceae; g__Schlegelella; s__uncultured bacterium
OTU_2919	0	0	0	0	0	0	0	0	0	0	0	0	0	k__Bacteria
OTU_2218	0	0	0	0	0	0	0	0	0	0	0	0	0	k__Bacteria; p__Bacteroidetes; c__Bacteroidia; o__Bacteroidales
OTU_646	0	0	0	0	0	0	0	0	0	0	0	0	0	k__Bacteria; p__Firmicutes; c__Clostridia; o__Clostridiales; f__Peptostreptococcaceae; g__Peptoclostridium; s__uncultured bacterium
OTU_745	0	0	0	0	0	0	0	1	0	0	0	0	0	k__Bacteria; p__Firmicutes; c__Clostridia; o__Clostridiales; f__Ruminococcaceae; g__Ruminococcaceae UCG-013
OTU_374	2	0	0	18	5	6	0	0	0	0	0	0	0	k__Bacteria; p__Firmicutes; c__Clostridia; o__Clostridiales; f__Ruminococcaceae; g__Ruminococcaceae UCG-005; s__uncultured bacterium
OTU_207	0	0	0	0	0	0	13	7	0	0	0	0	0	k__Bacteria; p__Bacteroidetes; c__Bacteroidia; o__Bacteroidales; f__Muribaculaceae; g__uncultured bacterium; s__uncultured bacterium
OTU_1218	4	2	10	1	13	1	0	0	1	1	2	7	7	k__Bacteria; p__Bacteroidetes; c__Bacteroidia; o__Bacteroidales; f__Muribaculaceae
OTU_2940	11	2	1	52	12	14	0	0	0	46	6	10	7	k__Bacteria; p__Bacteroidetes; c__Bacteroidia; o__Bacteroidales; f__Bacteroidaceae; g__Bacteroides; s__Bacteroides acidifaciens
OTU_1817	2	0	0	0	0	0	0	0	0	0	0	0	1	k__Bacteria; p__Bacteroidetes; c__Bacteroidia; o__Bacteroidales; f__Muribaculaceae; g__uncultured bacterium; s__uncultured bacterium
OTU_1433	0	1	0	0	0	0	0	0	0	0	0	0	1	k__Bacteria
OTU_2391	2	0	0	0	2	0	0	0	0	0	0	2	0	k__Bacteria; p__Bacteroidetes; c__Bacteroidia; o__Bacteroidales; f__Muribaculaceae; g__uncultured bacterium; s__uncultured bacterium
OTU_1923	0	0	0	0	0	0	0	0	0	0	0	0	0	k__Bacteria; p__Bacteroidetes; c__Bacteroidia; o__Bacteroidales; f__Muribaculaceae; g__uncultured bacterium; s__uncultured bacterium
OTU_2971	0	0	0	0	2	0	0	0	0	0	0	3	2	k__Bacteria; p__Bacteroidetes; c__Bacteroidia; o__Bacteroidales; f__Muribaculaceae; g__uncultured bacterium; s__uncultured bacterium
OTU_1326	0	0	0	0	0	0	0	0	0	0	0	0	0	k__Bacteria; p__Bacteroidetes; c__Bacteroidia; o__Bacteroidales
OTU_1045	0	0	0	0	0	0	7	0	0	1	0	0	2	k__Bacteria; p__Firmicutes; c__Clostridia; o__Clostridiales; f__Lachnospiraceae
OTU_2143	3	0	0	0	0	0	0	0	0	0	0	2	0	k__Bacteria; p__Firmicutes; c__Clostridia; o__Clostridiales; f__Ruminococcaceae
OTU_436	1	4	0	0	0	1	0	0	0	0	0	0	0	k__Bacteria; p__Firmicutes; c__Clostridia; o__Clostridiales; f__Lachnospiraceae; g__uncultured; s__uncultured bacterium
OTU_813	0	0	0	0	1	0	0	0	4	0	0	1	0	k__Bacteria; p__Firmicutes; c__Clostridia; o__Clostridiales; f__Christensenellaceae; g__Catabacter; s__Christensenella timonensis
OTU_2436	4	7	0	0	2	1	0	0	0	7	3	2	2	k__Bacteria; p__Bacteroidetes; c__Bacteroidia; o__Bacteroidales
OTU_2996	0	0	0	0	0	0	0	0	0	0	0	0	0	k__Bacteria; p__Bacteroidetes; c__Bacteroidia; o__Bacteroidales
OTU_1670	0	0	0	0	0	0	0	0	0	0	0	0	0	k__Bacteria
OTU_2115	0	0	0	0	1	0	0	0	0	0	0	0	0	k__Bacteria; p__Bacteroidetes; c__Bacteroidia; o__Bacteroidales; f__Muribaculaceae; g__uncultured bacterium; s__uncultured bacterium
OTU_78	6	1	2	2	5	2	394	2	1	7	3	8	3	k__Bacteria; p__Bacteroidetes; c__Bacteroidia; o__Bacteroidales; f__Bacteroidaceae; g__Bacteroides
OTU_2900	0	0	0	0	0	0	0	0	0	0	0	0	0	k__Bacteria; p__Firmicutes; c__Clostridia; o__Clostridiales; f__Lachnospiraceae
OTU_2026	10	0	5	1	24	0	0	0	4	2	1	25	14	k__Bacteria; p__Bacteroidetes; c__Bacteroidia; o__Bacteroidales; f__Muribaculaceae; g__uncultured bacterium; s__uncultured bacterium
OTU_2522	0	1	0	0	0	0	0	0	0	0	0	0	0	k__Bacteria; p__Bacteroidetes; c__Bacteroidia; o__Bacteroidales
OTU_1769	17	0	1	6	5	8	0	0	0	3	2	1	0	k__Bacteria; p__Bacteroidetes; c__Bacteroidia; o__Bacteroidales; f__Muribaculaceae; g__Muribaculum
OTU_2239	4	9	3	0	0	0	0	0	2	1	2	1	6	k__Bacteria; p__Bacteroidetes; c__Bacteroidia; o__Bacteroidales; f__Muribaculaceae; g__uncultured bacterium; s__uncultured bacterium
OTU_2812	0	0	0	0	0	0	0	0	0	0	0	0	0	k__Bacteria; p__Bacteroidetes; c__Bacteroidia; o__Bacteroidales; f__Muribaculaceae
OTU_2610	0	0	1	0	1	0	0	0	0	0	0	0	3	k__Bacteria; p__Bacteroidetes; c__Bacteroidia; o__Bacteroidales
OTU_2679	4	1	1	0	1	1	0	0	0	1	1	0	1	k__Bacteria; p__Bacteroidetes; c__Bacteroidia; o__Bacteroidales
OTU_2241	0	3	0	0	0	0	0	0	0	0	1	0	0	k__Bacteria; p__Bacteroidetes; c__Bacteroidia; o__Bacteroidales; f__Muribaculaceae
OTU_2910	0	0	0	0	0	0	0	0	0	0	0	0	0	k__Bacteria; p__Bacteroidetes; c__Bacteroidia; o__Bacteroidales; f__Muribaculaceae
OTU_1615	0	0	0	0	0	0	0	0	0	0	0	0	0	k__Bacteria; p__Bacteroidetes; c__Bacteroidia; o__Bacteroidales
OTU_1738	2	4	7	0	25	0	0	0	0	1	2	44	4	k__Bacteria; p__Bacteroidetes; c__Bacteroidia; o__Bacteroidales
OTU_1043	1	0	1	0	4	0	0	0	8	2	6	3	4	k__Bacteria; p__Bacteroidetes; c__Bacteroidia; o__Bacteroidales; f__Muribaculaceae; g__uncultured bacterium; s__uncultured bacterium
OTU_2313	6	5	5	0	3	1	0	0	0	2	0	3	11	k__Bacteria; p__Bacteroidetes; c__Bacteroidia; o__Bacteroidales; f__Muribaculaceae; g__uncultured bacterium; s__uncultured bacterium
OTU_1141	0	0	0	0	0	0	0	0	0	0	0	0	0	k__Bacteria
OTU_2943	0	0	0	0	0	0	0	0	0	0	0	0	0	k__Bacteria; p__Bacteroidetes; c__Bacteroidia; o__Bacteroidales; f__Bacteroidaceae; g__Bacteroides
OTU_1616	0	0	0	0	0	0	0	0	0	0	0	0	0	k__Bacteria; p__Bacteroidetes; c__Bacteroidia; o__Bacteroidales; f__Bacteroidaceae; g__Bacteroides
OTU_1968	6	16	18	0	35	1	0	1	8	10	10	68	11	k__Bacteria; p__Bacteroidetes; c__Bacteroidia; o__Bacteroidales; f__Muribaculaceae; g__uncultured bacterium; s__uncultured bacterium
OTU_1544	5	0	7	0	0	0	0	0	0	1	0	4	4	k__Bacteria; p__Bacteroidetes; c__Bacteroidia; o__Bacteroidales; f__Muribaculaceae; g__uncultured bacterium; s__uncultured bacterium
OTU_1124	1	2	0	0	0	0	0	0	6	0	0	1	0	k__Bacteria
OTU_1879	0	0	0	1	0	1	0	0	0	0	0	0	0	k__Bacteria; p__Bacteroidetes; c__Bacteroidia; o__Bacteroidales; f__Bacteroidaceae; g__Bacteroides
OTU_2858	0	0	0	0	0	0	0	0	0	0	0	0	0	k__Bacteria; p__Bacteroidetes; c__Bacteroidia; o__Bacteroidales; f__Muribaculaceae
OTU_140	0	17	0	1	0	86	0	0	0	28	0	1	5	k__Bacteria; p__Firmicutes; c__Clostridia; o__Clostridiales; f__Lachnospiraceae
OTU_1145	0	0	1	0	0	0	0	0	0	0	0	1	2	k__Bacteria; p__Bacteroidetes; c__Bacteroidia; o__Bacteroidales; f__Muribaculaceae; g__uncultured bacterium; s__uncultured bacterium
OTU_2196	0	0	0	0	0	0	0	0	0	0	0	0	0	k__Bacteria; p__Bacteroidetes; c__Bacteroidia; o__Bacteroidales; f__Muribaculaceae; g__uncultured bacterium; s__uncultured bacterium
OTU_2606	0	0	0	0	0	0	0	0	0	0	0	1	0	k__Bacteria; p__Bacteroidetes; c__Bacteroidia; o__Bacteroidales; f__Muribaculaceae; g__uncultured bacterium; s__uncultured bacterium
OTU_1375	0	0	0	0	0	0	0	0	0	0	0	0	0	k__Bacteria
OTU_2056	0	0	0	0	1	0	2	0	0	0	0	0	0	k__Bacteria; p__Bacteroidetes; c__Bacteroidia; o__Bacteroidales
OTU_2033	0	1	0	0	0	1	0	0	0	0	0	0	1	k__Bacteria; p__Bacteroidetes; c__Bacteroidia; o__Bacteroidales; f__Muribaculaceae
OTU_2638	1	0	1	0	0	0	0	0	0	0	0	4	1	k__Bacteria; p__Bacteroidetes; c__Bacteroidia; o__Bacteroidales; f__Muribaculaceae; g__uncultured bacterium; s__uncultured bacterium
OTU_3023	0	0	0	0	0	0	0	0	0	0	0	0	0	k__Bacteria; p__Bacteroidetes; c__Bacteroidia; o__Bacteroidales; f__Bacteroidaceae; g__Bacteroides
OTU_1822	0	0	0	0	0	0	0	0	0	0	0	0	0	k__Bacteria; p__Firmicutes; c__Clostridia; o__Clostridiales; f__Ruminococcaceae
OTU_1239	1	1	0	24	0	3	0	1	0	0	0	2	0	k__Bacteria; p__Firmicutes; c__Clostridia; o__Clostridiales; f__Lachnospiraceae
OTU_2498	0	0	0	0	0	0	0	0	0	0	0	0	0	k__Bacteria; p__Bacteroidetes; c__Bacteroidia; o__Bacteroidales; f__Muribaculaceae; g__uncultured bacterium; s__uncultured bacterium
OTU_1766	0	1	0	0	0	0	0	0	0	0	0	0	0	k__Bacteria
OTU_2353	0	0	0	0	0	0	0	0	0	1	0	3	0	k__Bacteria; p__Bacteroidetes; c__Bacteroidia; o__Bacteroidales; f__Muribaculaceae; g__uncultured bacterium; s__uncultured bacterium
OTU_529	0	0	0	1	0	0	1	2	0	0	0	0	0	k__Bacteria; p__Firmicutes; c__Clostridia; o__Clostridiales; f__Lachnospiraceae; g__[Eubacterium] hallii group; s__uncultured bacterium
OTU_441	6	0	1	0	0	1	0	0	1	1	0	3	6	k__Bacteria; p__Firmicutes; c__Clostridia; o__Clostridiales; f__Family XIII; g__Family XIII AD3011 group
OTU_1884	0	0	0	0	0	0	0	0	0	0	0	0	0	k__Bacteria; p__Bacteroidetes; c__Bacteroidia; o__Bacteroidales; f__Muribaculaceae
OTU_1637	0	0	0	0	0	0	0	0	0	0	0	0	0	k__Bacteria; p__Bacteroidetes; c__Bacteroidia; o__Bacteroidales; f__Muribaculaceae; g__uncultured bacterium; s__uncultured bacterium
OTU_803	0	0	0	0	0	0	0	8	0	0	0	0	0	k__Bacteria; p__Firmicutes; c__Clostridia; o__Clostridiales; f__Ruminococcaceae; g__Ruminococcaceae UCG-014
OTU_2907	0	0	0	0	0	0	0	0	0	0	0	0	0	k__Bacteria; p__Bacteroidetes; c__Bacteroidia; o__Bacteroidales; f__Muribaculaceae; g__uncultured bacterium; s__uncultured bacterium
OTU_1694	17	0	1	0	0	0	0	0	8	0	2	0	0	k__Bacteria; p__Bacteroidetes; c__Bacteroidia; o__Bacteroidales; f__Muribaculaceae; g__uncultured bacterium; s__uncultured bacterium
OTU_2804	0	0	0	0	0	0	0	0	0	0	0	0	0	k__Bacteria; p__Bacteroidetes; c__Bacteroidia; o__Bacteroidales; f__Muribaculaceae; g__uncultured bacterium; s__uncultured bacterium
OTU_2481	0	0	0	0	0	0	0	0	0	0	0	0	0	k__Bacteria; p__Bacteroidetes; c__Bacteroidia; o__Bacteroidales; f__Muribaculaceae; g__uncultured bacterium; s__uncultured bacterium
OTU_1829	1	15	1	0	0	0	0	0	0	1	1	0	3	k__Bacteria; p__Bacteroidetes; c__Bacteroidia; o__Bacteroidales; f__Muribaculaceae; g__uncultured bacterium; s__uncultured bacterium
OTU_1183	0	0	0	0	0	0	0	0	0	0	0	0	0	k__Bacteria; p__Firmicutes; c__Clostridia; o__Clostridiales; f__Ruminococcaceae
OTU_971	0	0	0	0	0	2	0	1	0	0	0	0	1	k__Bacteria; p__Actinobacteria; c__Actinobacteria; o__Micrococcales; f__Dermabacteraceae; g__Dermabacter
OTU_2235	0	0	0	0	0	0	0	0	0	0	0	0	0	k__Bacteria; p__Bacteroidetes; c__Bacteroidia; o__Bacteroidales; f__Muribaculaceae; g__uncultured bacterium; s__uncultured bacterium
OTU_289	2	0	0	3	0	0	29	0	7	0	0	0	0	k__Bacteria; p__Firmicutes; c__Erysipelotrichia; o__Erysipelotrichales; f__Erysipelotrichaceae; g__[Clostridium] innocuum group; s__uncultured bacterium
OTU_2203	0	0	0	0	0	0	0	0	0	0	0	3	0	k__Bacteria; p__Bacteroidetes; c__Bacteroidia; o__Bacteroidales; f__Muribaculaceae; g__uncultured bacterium; s__uncultured bacterium
OTU_1073	3	0	1	21	0	13	0	0	0	12	0	1	0	k__Bacteria; p__Bacteroidetes; c__Bacteroidia; o__Bacteroidales
OTU_2848	0	0	0	0	0	0	0	0	0	0	0	0	0	k__Bacteria; p__Bacteroidetes; c__Bacteroidia; o__Bacteroidales; f__Muribaculaceae; g__uncultured bacterium; s__uncultured bacterium
OTU_975	0	0	0	0	0	0	0	0	0	0	0	0	0	k__Bacteria; p__Cyanobacteria; c__Oxyphotobacteria; o__Chloroplast; f__Vischeria sp. CAUP Q 202; g__Vischeria sp. CAUP Q 202; s__Vischeria sp. CAUP Q 202
OTU_2336	0	0	0	0	0	0	0	0	0	0	0	0	0	k__Bacteria; p__Bacteroidetes; c__Bacteroidia; o__Bacteroidales; f__Muribaculaceae; g__uncultured bacterium; s__uncultured bacterium
OTU_1490	0	0	0	0	5	0	0	0	1	0	0	2	0	k__Bacteria; p__Bacteroidetes; c__Bacteroidia; o__Bacteroidales; f__Muribaculaceae; g__uncultured bacterium; s__uncultured bacterium
OTU_1960	0	0	0	0	1	1	0	0	0	1	0	0	1	k__Bacteria; p__Bacteroidetes; c__Bacteroidia; o__Bacteroidales; f__Bacteroidaceae; g__Bacteroides
OTU_224	0	3	0	0	0	2	144	0	0	1	0	0	0	k__Bacteria; p__Firmicutes; c__Clostridia; o__Clostridiales; f__Lachnospiraceae; g__Roseburia; s__uncultured bacterium
OTU_233	0	2	0	0	0	5	0	0	0	0	0	0	0	k__Bacteria; p__Firmicutes; c__Clostridia; o__Clostridiales; f__Lachnospiraceae; g__uncultured; s__uncultured bacterium
OTU_2568	0	0	0	0	0	0	0	0	0	0	0	0	0	k__Bacteria; p__Proteobacteria; c__Gammaproteobacteria; o__Oceanospirillales; f__Endozoicomonadaceae; g__Endozoicomonas; s__Candidatus Endonucleobacter bathymodioli
OTU_390	0	6	0	0	0	3	21	0	0	0	0	0	1	k__Bacteria; p__Firmicutes; c__Clostridia; o__Clostridiales; f__Ruminococcaceae; g__Negativibacillus; s__uncultured bacterium
OTU_1360	0	0	0	0	0	0	0	0	0	0	0	0	0	k__Bacteria; p__Bacteroidetes; c__Bacteroidia; o__Bacteroidales; f__Muribaculaceae; g__uncultured bacterium; s__uncultured bacterium
OTU_1853	0	0	0	0	0	0	0	0	0	0	0	0	0	k__Bacteria
OTU_2258	0	0	1	0	0	0	0	0	0	0	0	1	0	k__Bacteria; p__Bacteroidetes; c__Bacteroidia; o__Bacteroidales
OTU_1350	0	0	1	0	0	0	0	0	0	0	0	3	0	k__Bacteria; p__Bacteroidetes; c__Bacteroidia; o__Bacteroidales; f__Muribaculaceae; g__uncultured bacterium; s__uncultured bacterium
OTU_1197	0	0	0	0	0	0	0	0	0	0	0	0	0	k__Bacteria; p__Firmicutes; c__Erysipelotrichia; o__Erysipelotrichales; f__Erysipelotrichaceae; g__Catenibacterium; s__uncultured bacterium
OTU_957	1	11	1	0	0	23	0	0	0	0	0	0	0	k__Bacteria; p__Firmicutes; c__Clostridia; o__Clostridiales; f__Lachnospiraceae; g__Lachnospiraceae NK4A136 group; s__uncultured bacterium
OTU_2338	0	0	1	0	3	0	0	0	0	0	0	1	0	k__Bacteria; p__Bacteroidetes; c__Bacteroidia; o__Bacteroidales; f__Muribaculaceae; g__uncultured bacterium; s__uncultured bacterium
OTU_1646	0	0	0	0	0	0	0	0	0	0	0	0	0	k__Bacteria; p__Bacteroidetes; c__Bacteroidia; o__Bacteroidales; f__Bacteroidaceae; g__Bacteroides
OTU_2635	0	0	0	0	0	0	0	0	0	0	0	0	0	k__Bacteria; p__Bacteroidetes; c__Bacteroidia; o__Bacteroidales; f__Muribaculaceae; g__uncultured bacterium; s__uncultured bacterium
OTU_2745	1	1	1	0	1	0	0	0	0	0	0	0	0	k__Bacteria; p__Bacteroidetes; c__Bacteroidia; o__Bacteroidales; f__Muribaculaceae; g__uncultured bacterium; s__uncultured bacterium
OTU_2267	3	0	1	0	0	0	0	0	0	0	0	0	0	k__Bacteria; p__Bacteroidetes; c__Bacteroidia; o__Bacteroidales
OTU_1702	6	0	1	10	1	53	0	0	0	19	0	4	0	k__Bacteria; p__Bacteroidetes; c__Bacteroidia; o__Bacteroidales
OTU_2467	0	2	1	0	0	0	0	0	0	2	0	5	3	k__Bacteria; p__Bacteroidetes; c__Bacteroidia; o__Bacteroidales; f__Muribaculaceae; g__uncultured bacterium; s__uncultured bacterium
OTU_1954	0	0	0	0	0	1	0	0	0	0	0	0	0	k__Bacteria; p__Bacteroidetes; c__Bacteroidia; o__Bacteroidales; f__Rikenellaceae; g__Alistipes
OTU_2316	0	0	0	0	0	0	0	0	0	0	0	1	0	k__Bacteria; p__Bacteroidetes; c__Bacteroidia; o__Bacteroidales; f__Muribaculaceae; g__uncultured bacterium; s__uncultured bacterium
OTU_3014	0	0	0	0	0	0	0	0	0	0	0	0	0	k__Bacteria; p__Bacteroidetes; c__Bacteroidia; o__Bacteroidales; f__Muribaculaceae; g__uncultured bacterium; s__uncultured bacterium
OTU_186	1	0	0	0	0	1	11	0	0	0	0	0	0	k__Bacteria; p__Proteobacteria; c__Alphaproteobacteria; o__Rhizobiales; f__Beijerinckiaceae; g__Bosea; s__uncultured bacterium
OTU_1498	0	0	0	0	0	0	0	0	0	0	0	0	0	k__Bacteria; p__Bacteroidetes; c__Bacteroidia; o__Bacteroidales; f__Rikenellaceae; g__Alistipes
OTU_1756	0	0	2	0	0	3	0	0	0	0	0	0	1	k__Bacteria; p__Bacteroidetes; c__Bacteroidia; o__Bacteroidales
OTU_681	1	0	0	3	3	1	0	0	0	0	0	0	0	k__Bacteria; p__Firmicutes; c__Bacilli; o__Lactobacillales; f__Streptococcaceae; g__Streptococcus; s__Streptococcus anginosus C238
OTU_2874	2	0	1	0	0	0	0	0	0	0	0	0	0	k__Bacteria; p__Bacteroidetes; c__Bacteroidia; o__Bacteroidales
OTU_2690	15	0	6	3	0	8	0	0	1	5	0	1	26	k__Bacteria; p__Bacteroidetes; c__Bacteroidia; o__Bacteroidales
OTU_1692	0	0	0	0	0	0	0	0	0	0	0	0	0	k__Bacteria
OTU_1224	0	0	0	0	0	0	0	0	0	0	0	0	0	k__Bacteria; p__Bacteroidetes; c__Bacteroidia; o__Bacteroidales; f__Muribaculaceae; g__uncultured bacterium; s__uncultured bacterium
OTU_359	0	0	0	0	0	1	4	9	0	24	0	0	0	k__Bacteria; p__Firmicutes; c__Clostridia; o__Clostridiales; f__Lachnospiraceae
OTU_843	0	0	0	0	0	0	0	3	0	0	0	0	0	k__Bacteria; p__Firmicutes; c__Bacilli; o__Bacillales; f__Bacillaceae; g__Bacillus; s__Bacillus thermoamylovorans
OTU_2661	0	0	0	1	0	0	0	0	0	0	0	0	58	k__Bacteria; p__Firmicutes; c__Clostridia; o__Clostridiales; f__Lachnospiraceae; g__Roseburia; s__mouse gut metagenome
OTU_2486	0	1	1	0	0	0	0	0	0	0	0	0	0	k__Bacteria; p__Bacteroidetes; c__Bacteroidia; o__Bacteroidales; f__Muribaculaceae
OTU_94	0	4	5	1	2	761	0	8	1	0	0	0	0	k__Bacteria; p__Firmicutes; c__Clostridia; o__Clostridiales; f__Lachnospiraceae; g__Blautia; s__Lachnospiraceae bacterium 28-4
OTU_602	0	0	0	0	0	0	0	0	0	2	0	0	0	k__Bacteria; p__Bacteroidetes; c__Bacteroidia; o__Bacteroidales; f__Rikenellaceae; g__Alistipes; s__uncultured bacterium
OTU_136	1	4	0	0	1	1	0	4	0	1	2	3	0	k__Bacteria; p__Bacteroidetes; c__Bacteroidia; o__Bacteroidales; f__Bacteroidaceae; g__Bacteroides
OTU_281	0	0	0	0	0	0	0	0	0	0	0	0	0	k__Bacteria; p__Firmicutes; c__Negativicutes; o__Selenomonadales; f__Veillonellaceae; g__Mitsuokella; s__uncultured bacterium
OTU_587	0	0	0	0	0	0	0	0	0	0	0	0	0	k__Bacteria; p__Proteobacteria; c__Alphaproteobacteria; o__Sphingomonadales; f__Sphingomonadaceae; g__Novosphingobium
OTU_429	0	0	0	0	0	0	0	0	0	0	0	0	0	k__Bacteria; p__Actinobacteria; c__Thermoleophilia; o__Solirubrobacterales; f__Solirubrobacteraceae; g__Conexibacter; s__uncultured bacterium
OTU_363	0	0	0	0	0	0	0	0	0	0	0	0	0	k__Bacteria; p__Firmicutes; c__Clostridia; o__Clostridiales; f__Ruminococcaceae; g__Ruminiclostridium 6; s__uncultured bacterium
OTU_433	0	0	0	0	0	0	0	0	0	0	0	0	0	k__Bacteria; p__Patescibacteria; c__Saccharimonadia; o__Saccharimonadales; f__uncultured bacterium; g__uncultured bacterium; s__uncultured bacterium
OTU_661	0	0	0	0	0	0	0	0	0	0	0	0	0	k__Bacteria; p__Proteobacteria; c__Deltaproteobacteria; o__Syntrophobacterales; f__Syntrophobacteraceae; g__uncultured
OTU_180	5	0	0	0	0	1	0	7	0	1	0	0	2	k__Bacteria; p__Actinobacteria; c__Actinobacteria; o__Micrococcales; f__Microbacteriaceae; g__Microbacterium
OTU_315	0	0	0	0	1	0	0	0	0	0	0	0	1	k__Bacteria; p__Firmicutes; c__Bacilli; o__Bacillales; f__Bacillaceae; g__Bacillus; s__Bacillus sonorensis
OTU_795	0	0	0	0	0	0	0	0	0	0	0	0	0	k__Bacteria; p__Bacteroidetes; c__Bacteroidia; o__Chitinophagales; f__Chitinophagaceae; g__Lacibacter; s__uncultured bacterium
OTU_147	0	14	1	0	0	9	0	0	0	0	0	2	0	k__Bacteria; p__Firmicutes; c__Clostridia; o__Clostridiales; f__Lachnospiraceae; g__Lachnospiraceae NK4A136 group; s__uncultured Clostridiales bacterium
OTU_318	0	0	0	0	0	0	0	0	0	0	0	0	0	k__Bacteria; p__Proteobacteria; c__Gammaproteobacteria; o__Xanthomonadales; f__Rhodanobacteraceae; g__Tahibacter; s__uncultured bacterium
OTU_527	0	0	0	0	0	0	0	0	0	0	0	0	0	k__Bacteria; p__Bacteroidetes; c__Bacteroidia; o__Chitinophagales; f__Chitinophagaceae; g__Niastella; s__uncultured bacterium
OTU_854	0	0	0	0	0	0	0	0	0	0	0	0	0	k__Bacteria; p__Actinobacteria; c__Actinobacteria; o__Frankiales; f__Acidothermaceae; g__Acidothermus
OTU_137	1	0	0	0	0	2	0	0	1	0	1	0	0	k__Bacteria; p__Firmicutes; c__Clostridia; o__Clostridiales; f__Lachnospiraceae; g__Fusicatenibacter
OTU_2686	0	0	0	0	0	0	0	0	1	0	0	0	0	k__Bacteria; p__Firmicutes; c__Clostridia; o__Clostridiales; f__Ruminococcaceae; g__Ruminococcaceae NK4A214 group; s__gut metagenome
OTU_615	0	0	0	0	0	0	0	0	0	0	0	0	0	k__Bacteria; p__Bacteroidetes; c__Bacteroidia; o__Chitinophagales; f__Chitinophagaceae; g__Dinghuibacter; s__uncultured bacterium
OTU_368	0	0	0	0	0	0	7	0	17	0	2	0	0	k__Bacteria; p__Proteobacteria; c__Alphaproteobacteria; o__Rhodospirillales; f__uncultured; g__Azospirillum sp. 47_25; s__Azospirillum sp. 47_25
OTU_175	0	115	1	0	9	34	0	12	0	0	26	0	0	k__Bacteria; p__Firmicutes; c__Clostridia; o__Clostridiales; f__Lachnospiraceae
OTU_515	0	0	0	0	0	0	0	0	0	0	0	0	0	k__Bacteria; p__Actinobacteria; c__Actinobacteria; o__Pseudonocardiales; f__Pseudonocardiaceae; g__Pseudonocardia; s__uncultured bacterium
OTU_2533	3	0	0	0	0	0	4	0	0	0	0	0	0	k__Bacteria; p__Firmicutes; c__Clostridia; o__Clostridiales; f__Lachnospiraceae; g__Lachnospiraceae NK4A136 group; s__uncultured bacterium
OTU_426	0	0	0	0	0	0	0	0	0	0	0	0	0	k__Bacteria; p__Firmicutes; c__Clostridia; o__Clostridiales; f__Ruminococcaceae; g__Ruminococcaceae NK4A214 group
OTU_379	0	0	0	0	0	0	0	0	0	0	0	0	0	k__Bacteria; p__Firmicutes; c__Clostridia; o__Clostridiales; f__Christensenellaceae; g__Christensenellaceae R-7 group
OTU_982	1	0	0	0	0	0	4	0	0	0	1	0	2	k__Bacteria; p__Firmicutes; c__Clostridia; o__Clostridiales; f__Lachnospiraceae
OTU_132	1	1	2	2	2	2	0	5	0	0	2	1	0	k__Bacteria; p__Proteobacteria; c__Alphaproteobacteria; o__Rhizobiales; f__Xanthobacteraceae
OTU_3004	0	0	0	0	0	0	0	0	0	0	0	1	1	k__Bacteria; p__Firmicutes; c__Clostridia; o__Clostridiales; f__Lachnospiraceae
OTU_445	0	0	0	0	0	0	0	0	0	0	0	0	0	k__Bacteria; p__Firmicutes; c__Clostridia; o__Clostridiales; f__Ruminococcaceae; g__Ruminococcaceae UCG-014
OTU_600	0	0	0	0	0	0	0	0	0	0	0	0	0	k__Bacteria; p__Firmicutes; c__Bacilli; o__Bacillales
OTU_80	0	0	0	1	0	0	19	6	0	0	1	0	0	k__Bacteria; p__Actinobacteria; c__Actinobacteria; o__Corynebacteriales; f__Nocardiaceae; g__Rhodococcus; s__Rhodococcus erythropolis
OTU_470	0	1	0	0	0	0	0	0	0	1	0	0	0	k__Bacteria; p__Firmicutes; c__Erysipelotrichia; o__Erysipelotrichales; f__Erysipelotrichaceae; g__Erysipelotrichaceae UCG-003; s__uncultured bacterium
OTU_596	0	0	0	0	0	0	0	0	0	0	0	0	0	k__Bacteria; p__Bacteroidetes; c__Bacteroidia; o__Flavobacteriales; f__Weeksellaceae; g__Empedobacter
OTU_521	0	0	0	0	0	0	0	0	0	0	0	1	0	k__Bacteria; p__Proteobacteria; c__Alphaproteobacteria; o__Azospirillales; f__Azospirillaceae; g__Skermanella; s__uncultured bacterium
OTU_774	0	0	0	0	0	0	0	0	0	0	0	0	0	k__Bacteria; p__Gemmatimonadetes; c__Gemmatimonadetes; o__Gemmatimonadales; f__Gemmatimonadaceae; g__uncultured
OTU_499	0	0	0	0	0	0	0	0	0	0	0	0	0	k__Bacteria; p__Firmicutes; c__Clostridia; o__Clostridiales; f__Lachnospiraceae; g__[Eubacterium] eligens group
OTU_448	0	0	0	0	0	0	0	0	0	0	0	0	0	k__Bacteria; p__Actinobacteria; c__Actinobacteria; o__Micromonosporales; f__Micromonosporaceae; g__Actinoplanes
OTU_557	0	0	0	0	0	0	0	0	0	0	0	0	0	k__Bacteria; p__Cyanobacteria; c__Sericytochromatia; o__metagenome; f__metagenome; g__metagenome; s__metagenome
OTU_709	0	0	0	0	0	0	0	0	0	0	0	0	0	k__Bacteria; p__Proteobacteria; c__Gammaproteobacteria; o__Xanthomonadales; f__Xanthomonadaceae; g__Pseudoxanthomonas
OTU_593	0	0	0	0	0	0	0	0	0	0	0	0	0	k__Bacteria; p__Proteobacteria; c__Deltaproteobacteria; o__NB1-j; f__uncultured bacterium; g__uncultured bacterium; s__uncultured bacterium
OTU_707	0	0	0	0	0	0	0	0	0	0	0	0	0	k__Bacteria; p__Bacteroidetes; c__Bacteroidia; o__Sphingobacteriales; f__AKYH767; g__metagenome; s__metagenome
OTU_511	0	0	0	0	0	0	0	0	0	0	0	0	0	k__Bacteria; p__Bacteroidetes; c__Bacteroidia; o__Bacteroidales; f__Bacteroidales UCG-001; g__uncultured rumen bacterium; s__uncultured rumen bacterium
OTU_205	0	0	0	0	0	0	0	0	0	0	0	0	0	k__Bacteria; p__Proteobacteria; c__Alphaproteobacteria; o__Azospirillales; f__Azospirillaceae; g__Niveispirillum; s__uncultured bacterium
OTU_1450	0	0	0	0	0	0	0	0	0	0	0	0	0	k__Bacteria; p__Firmicutes; c__Clostridia; o__Clostridiales; f__Lachnospiraceae
OTU_872	0	0	0	0	0	0	0	0	0	0	0	0	0	k__Bacteria; p__Tenericutes; c__Mollicutes; o__Mollicutes RF39; f__uncultured bacterium; g__uncultured bacterium; s__uncultured bacterium
OTU_389	0	0	0	0	0	0	0	0	0	0	0	0	0	k__Bacteria; p__Bacteroidetes; c__Bacteroidia; o__Chitinophagales; f__Chitinophagaceae; g__Heliimonas; s__metagenome
OTU_963	0	0	3	0	0	0	0	0	1	0	1	0	0	k__Bacteria; p__Firmicutes; c__Bacilli; o__Lactobacillales; f__Lactobacillaceae; g__Lactobacillus
OTU_174	1	0	0	0	0	0	6	0	0	0	0	0	0	k__Bacteria; p__Proteobacteria; c__Gammaproteobacteria; o__Betaproteobacteriales; f__Burkholderiaceae; g__Pelomonas; s__uncultured bacterium
OTU_509	0	0	0	0	0	0	0	1	0	1	0	0	0	k__Bacteria; p__Actinobacteria; c__Actinobacteria; o__Propionibacteriales; f__Nocardioidaceae; g__Marmoricola
OTU_619	0	0	0	0	0	0	0	0	0	0	0	0	0	k__Bacteria; p__Acidobacteria; c__Subgroup 6
OTU_2936	0	0	0	0	0	0	0	0	0	0	0	0	0	k__Bacteria; p__Firmicutes; c__Clostridia; o__Clostridiales; f__Ruminococcaceae; g__Pygmaiobacter; s__uncultured bacterium
OTU_432	0	0	0	0	0	0	2	0	0	0	0	0	0	k__Bacteria; p__Actinobacteria; c__Actinobacteria; o__Frankiales; f__Geodermatophilaceae
OTU_417	0	0	0	0	0	0	0	0	0	0	0	0	0	k__Bacteria; p__Firmicutes; c__Negativicutes; o__Selenomonadales; f__Acidaminococcaceae; g__Acidaminococcus; s__Acidaminococcus intestini DSM 21505
OTU_86	0	1	0	3	0	0	252	11	0	0	0	1	0	k__Bacteria; p__Bacteroidetes; c__Bacteroidia; o__Bacteroidales; f__Bacteroidaceae; g__Bacteroides; s__Bacteroides massiliensis dnLKV3
OTU_491	0	0	0	0	0	0	0	0	0	0	0	0	0	k__Bacteria; p__Proteobacteria; c__Gammaproteobacteria; o__Betaproteobacteriales; f__Burkholderiaceae; g__Alcaligenes
OTU_468	0	0	0	0	0	1	0	0	0	0	0	0	5	k__Bacteria; p__Actinobacteria; c__Actinobacteria; o__Streptomycetales; f__Streptomycetaceae; g__Streptomyces
OTU_542	0	0	0	0	0	0	0	0	0	0	0	0	0	k__Bacteria; p__Acidobacteria; c__Subgroup 6
OTU_647	0	0	0	0	0	0	0	0	0	0	0	0	0	k__Bacteria; p__Bacteroidetes; c__Bacteroidia; o__Chitinophagales; f__Chitinophagaceae; g__Flavitalea; s__uncultured bacterium
OTU_208	1	0	0	1	0	1	22	8	0	0	0	0	0	k__Bacteria; p__Proteobacteria; c__Gammaproteobacteria; o__Pseudomonadales; f__Moraxellaceae; g__Acinetobacter
OTU_513	0	0	0	0	0	0	0	0	0	0	0	0	0	k__Bacteria; p__Proteobacteria; c__Gammaproteobacteria; o__Betaproteobacteriales
OTU_738	0	0	0	0	0	0	0	0	0	0	0	0	0	k__Bacteria; p__Proteobacteria; c__Deltaproteobacteria; o__Myxococcales; f__Sandaracinaceae; g__uncultured
OTU_404	0	0	0	0	0	0	0	0	0	0	0	0	0	k__Bacteria; p__Proteobacteria; c__Alphaproteobacteria; o__Rhizobiales; f__Rhizobiaceae; g__Allorhizobium-Neorhizobium-Pararhizobium-Rhizobium
OTU_797	0	0	0	0	0	0	0	0	0	0	0	0	0	k__Bacteria; p__Firmicutes; c__Bacilli; o__Lactobacillales; f__Lactobacillaceae; g__Lactobacillus; s__Lactobacillus mucosae
OTU_279	0	0	0	0	0	0	0	0	0	0	0	0	0	k__Bacteria; p__Proteobacteria; c__Alphaproteobacteria; o__Rhodospirillales; f__Magnetospirillaceae
OTU_403	0	0	0	0	0	0	0	0	0	0	0	0	0	k__Bacteria; p__Bacteroidetes; c__Bacteroidia; o__Bacteroidales; f__Dysgonomonadaceae; g__Dysgonomonas; s__uncultured bacterium
OTU_235	0	0	0	0	0	0	0	0	0	0	0	0	0	k__Bacteria; p__Proteobacteria; c__Alphaproteobacteria; o__Rhizobiales; f__Stappiaceae; g__Pannonibacter; s__uncultured bacterium
OTU_81	0	0	0	2	0	0	27	8	258	0	0	1	4	k__Bacteria; p__Bacteroidetes; c__Bacteroidia; o__Bacteroidales; f__Tannerellaceae; g__Parabacteroides; s__uncultured bacterium
OTU_348	0	0	5	0	15	0	2	0	0	0	0	0	1	k__Bacteria; p__Bacteroidetes; c__Bacteroidia; o__Bacteroidales; f__Bacteroidaceae; g__Bacteroides; s__Bacteroides fragilis
OTU_443	0	0	0	0	0	0	0	0	0	0	0	0	0	k__Bacteria; p__Acidobacteria; c__Acidobacteriia; o__Solibacterales; f__Solibacteraceae (Subgroup 3); g__Candidatus Solibacter; s__uncultured Acidobacteria bacterium
OTU_457	0	0	0	0	0	0	0	0	0	0	0	0	0	k__Bacteria; p__Proteobacteria; c__Alphaproteobacteria; o__Rhizobiales; f__Rhizobiaceae; g__Mesorhizobium; s__uncultured bacterium
OTU_1359	0	0	0	0	0	0	0	0	0	0	0	0	0	k__Bacteria; p__Firmicutes; c__Bacilli; o__Bacillales; f__Bacillaceae; g__Bacillus
OTU_423	0	0	0	0	0	0	0	0	0	0	0	0	0	k__Bacteria; p__Actinobacteria; c__Thermoleophilia; o__Gaiellales; f__uncultured
OTU_765	0	0	0	0	0	0	0	0	0	0	0	0	0	k__Bacteria; p__Acidobacteria; c__Blastocatellia (Subgroup 4); o__Blastocatellales; f__Blastocatellaceae
OTU_496	3	1	0	0	0	0	0	0	0	0	0	0	0	k__Bacteria; p__Bacteroidetes; c__Bacteroidia; o__Chitinophagales; f__Chitinophagaceae; g__Vibrionimonas; s__uncultured soil bacterium
OTU_510	0	0	0	0	1	0	0	1	0	1	0	0	1	k__Bacteria; p__Proteobacteria; c__Alphaproteobacteria; o__Rhizobiales; f__Xanthobacteraceae; g__uncultured
OTU_250	0	0	0	0	0	0	1	1	0	0	0	0	0	k__Bacteria; p__Proteobacteria; c__Alphaproteobacteria; o__Caulobacterales; f__Caulobacteraceae; g__Asticcacaulis; s__Asticcacaulis excentricus
OTU_431	0	0	0	0	0	0	0	0	0	0	0	0	0	k__Bacteria; p__Patescibacteria; c__Saccharimonadia; o__Saccharimonadales
OTU_482	0	0	0	0	0	0	0	0	0	0	0	0	0	k__Bacteria; p__Proteobacteria; c__Gammaproteobacteria; o__Betaproteobacteriales; f__SC-I-84; g__uncultured bacterium; s__uncultured bacterium
OTU_696	0	0	0	0	0	0	0	0	0	0	0	0	0	k__Bacteria; p__Acidobacteria; c__Acidobacteriia; o__Acidobacteriales; f__uncultured; g__uncultured Acidobacteria bacterium; s__uncultured Acidobacteria bacterium
OTU_392	0	0	0	0	0	0	0	0	0	0	0	0	0	k__Bacteria; p__Bacteroidetes; c__Bacteroidia; o__Cytophagales; f__Microscillaceae; g__Siphonobacter; s__Siphonobacter aquaeclarae
OTU_328	0	1	2	0	0	0	0	9	0	0	0	1	0	k__Bacteria; p__Firmicutes; c__Clostridia; o__Clostridiales; f__Lachnospiraceae; g__Lachnospiraceae NK4A136 group; s__uncultured bacterium
OTU_788	0	0	0	0	0	0	1	0	0	0	0	0	0	k__Bacteria; p__Bacteroidetes; c__Bacteroidia; o__Bacteroidales; f__Muribaculaceae; g__uncultured bacterium; s__uncultured bacterium
OTU_466	0	0	0	0	0	0	0	0	0	0	0	0	0	k__Bacteria; p__Bacteroidetes; c__Bacteroidia; o__Chitinophagales; f__Chitinophagaceae; g__Chitinophaga
OTU_1726	0	0	0	0	0	0	0	1	0	0	0	0	0	k__Bacteria; p__Firmicutes; c__Clostridia; o__Clostridiales; f__Lachnospiraceae
OTU_427	0	0	0	0	0	0	0	0	0	0	0	0	0	k__Bacteria; p__Acidobacteria; c__Blastocatellia (Subgroup 4); o__Blastocatellales; f__Blastocatellaceae; g__Aridibacter; s__uncultured bacterium
OTU_520	0	0	0	0	0	0	0	0	0	0	0	0	0	k__Bacteria; p__Acidobacteria; c__Acidobacteriia; o__Subgroup 2; f__uncultured Acidobacteria bacterium; g__uncultured Acidobacteria bacterium; s__uncultured Acidobacteria bacterium
OTU_595	0	0	0	0	0	0	0	0	0	0	0	0	1	k__Bacteria; p__Firmicutes; c__Clostridia; o__Clostridiales; f__Ruminococcaceae; g__Ruminococcaceae UCG-014
OTU_355	0	0	0	0	0	0	0	0	0	0	0	0	0	k__Bacteria; p__Epsilonbacteraeota; c__Campylobacteria; o__Campylobacterales; f__Helicobacteraceae; g__Helicobacter
OTU_304	0	0	0	0	0	0	0	3	0	0	0	0	0	k__Bacteria; p__Bacteroidetes; c__Bacteroidia; o__Bacteroidales; f__Rikenellaceae; g__Rikenella; s__uncultured bacterium
OTU_821	0	0	0	0	0	0	0	0	0	0	0	0	0	k__Bacteria; p__Firmicutes; c__Bacilli; o__Bacillales; f__Paenibacillaceae; g__Paenibacillus; s__Paenibacillus validus
OTU_342	0	0	0	0	0	0	2	0	0	0	0	0	0	k__Bacteria; p__Firmicutes; c__Clostridia; o__Clostridiales; f__Ruminococcaceae; g__Ruminococcaceae NK4A214 group; s__uncultured rumen bacterium
OTU_586	0	0	0	0	0	0	0	0	0	0	0	0	0	k__Bacteria; p__Acidobacteria; c__Blastocatellia (Subgroup 4); o__Pyrinomonadales; f__Pyrinomonadaceae; g__RB41
OTU_605	0	0	0	0	1	0	0	0	0	1	0	0	0	k__Bacteria; p__Proteobacteria; c__Gammaproteobacteria; o__Xanthomonadales; f__Xanthomonadaceae; g__Pseudoxanthomonas; s__uncultured bacterium
OTU_45	0	0	0	0	0	0	0	0	287	31	89	5	0	k__Bacteria; p__Proteobacteria; c__Deltaproteobacteria; o__Desulfovibrionales; f__Desulfovibrionaceae; g__Desulfovibrio; s__uncultured bacterium
OTU_413	0	0	0	0	0	0	0	0	0	0	0	0	0	k__Bacteria; p__Proteobacteria; c__Deltaproteobacteria; o__Myxococcales; f__mle1-27
OTU_897	0	0	0	0	0	0	11	0	0	0	0	0	1	k__Bacteria; p__Firmicutes; c__Clostridia; o__Clostridiales; f__Lachnospiraceae
OTU_324	0	0	0	0	0	0	0	0	0	0	0	0	0	k__Bacteria; p__Firmicutes; c__Clostridia; o__Clostridiales; f__Ruminococcaceae; g__Ruminococcus 2; s__uncultured bacterium
OTU_479	0	1	0	0	0	0	0	0	0	0	0	1	0	k__Bacteria; p__Firmicutes; c__Bacilli; o__Bacillales; f__Bacillaceae; g__Bacillus; s__Bacillus drentensis
OTU_360	0	0	0	0	0	0	0	0	0	0	0	0	0	k__Bacteria; p__Firmicutes; c__Bacilli; o__Bacillales; f__Family XII; g__Exiguobacterium; s__Exiguobacterium acetylicum
OTU_1082	0	0	0	0	0	0	0	0	0	0	0	0	0	k__Bacteria; p__Acidobacteria; c__Subgroup 6; o__uncultured bacterium; f__uncultured bacterium; g__uncultured bacterium; s__uncultured bacterium
OTU_256	0	0	0	0	0	0	3	0	0	0	0	0	0	k__Bacteria; p__Proteobacteria; c__Gammaproteobacteria; o__Betaproteobacteriales; f__Hydrogenophilaceae; g__Hydrogenophilus; s__uncultured bacterium
OTU_741	0	1	0	0	0	1	0	0	5	0	0	3	1	k__Bacteria; p__Proteobacteria; c__Gammaproteobacteria; o__Enterobacteriales; f__Enterobacteriaceae; g__Pantoea
OTU_556	0	0	0	0	0	0	0	0	0	0	0	0	0	k__Bacteria; p__Proteobacteria; c__Gammaproteobacteria; o__Xanthomonadales; f__Xanthomonadaceae; g__Arenimonas; s__uncultured soil bacterium
OTU_505	1	0	0	0	0	0	0	2	0	0	0	0	0	k__Bacteria; p__Firmicutes; c__Clostridia; o__Clostridiales; f__Lachnospiraceae; g__Roseburia; s__uncultured bacterium
OTU_483	0	1	0	0	0	1	0	0	0	0	0	0	0	k__Bacteria; p__Firmicutes; c__Clostridia; o__Clostridiales; f__Ruminococcaceae; g__Ruminococcus 1; s__Ruminococcus sp. UNK.MGS-30
OTU_748	0	0	0	0	0	0	0	0	0	0	0	0	0	k__Bacteria; p__Firmicutes; c__Clostridia; o__Clostridiales; f__Christensenellaceae; g__Christensenellaceae R-7 group
OTU_751	0	0	0	0	0	0	0	0	0	0	0	0	0	k__Bacteria; p__Tenericutes; c__Mollicutes; o__Mollicutes RF39
OTU_752	0	0	0	0	0	0	0	0	0	0	0	0	0	k__Bacteria; p__Verrucomicrobia; c__Verrucomicrobiae; o__Verrucomicrobiales; f__Verrucomicrobiaceae; g__uncultured; s__uncultured Verrucomicrobiaceae bacterium
OTU_582	0	0	0	0	0	0	0	0	0	0	0	0	0	k__Bacteria; p__Patescibacteria; c__Saccharimonadia; o__Saccharimonadales; f__Saccharimonadaceae; g__uncultured bacterium; s__uncultured bacterium
OTU_731	0	0	0	0	0	0	0	0	0	0	0	0	0	k__Bacteria; p__Proteobacteria; c__Deltaproteobacteria; o__Oligoflexales; f__0319-6G20
OTU_853	0	1	0	0	0	0	0	0	0	0	0	0	0	k__Bacteria; p__Firmicutes; c__Erysipelotrichia; o__Erysipelotrichales; f__Erysipelotrichaceae; g__Faecalitalea; s__Eubacterium sp. 1-5
OTU_572	0	0	0	0	0	0	0	0	0	0	0	0	0	k__Bacteria; p__Gemmatimonadetes; c__Gemmatimonadetes; o__Gemmatimonadales; f__Gemmatimonadaceae; g__Gemmatimonas
OTU_450	0	1	0	0	0	2	6	0	0	1	0	0	0	k__Bacteria; p__Firmicutes; c__Clostridia; o__Clostridiales; f__Lachnospiraceae
OTU_730	0	0	0	0	0	0	0	0	0	0	0	0	0	k__Bacteria; p__Bacteroidetes; c__Bacteroidia; o__Chitinophagales; f__Chitinophagaceae; g__Chitinophaga
OTU_1392	0	0	0	0	0	0	0	0	0	0	0	0	0	k__Bacteria; p__Firmicutes; c__Clostridia; o__Clostridiales; f__Lachnospiraceae; g__Coprococcus 2
OTU_622	0	0	0	0	0	0	0	0	0	0	0	0	0	k__Bacteria; p__Firmicutes; c__Clostridia; o__Clostridiales; f__Ruminococcaceae; g__Ruminococcaceae V9D2013 group; s__uncultured bacterium
OTU_559	0	0	0	0	0	0	0	0	0	0	0	0	0	k__Bacteria; p__Acidobacteria; c__Subgroup 5; o__uncultured Acidobacteria bacterium; f__uncultured Acidobacteria bacterium; g__uncultured Acidobacteria bacterium; s__uncultured Acidobacteria bacterium
OTU_287	0	0	0	0	0	0	3	3	0	0	0	0	0	k__Bacteria; p__Bacteroidetes; c__Bacteroidia; o__Flavobacteriales; f__Flavobacteriaceae; g__Flavobacterium
OTU_362	0	2	0	1	1	0	0	1	0	0	1	0	0	k__Bacteria; p__Bacteroidetes; c__Bacteroidia; o__Bacteroidales; f__Marinifilaceae; g__Odoribacter; s__uncultured bacterium
OTU_536	0	0	0	0	0	0	0	0	0	0	0	0	0	k__Bacteria; p__Proteobacteria; c__Gammaproteobacteria; o__Betaproteobacteriales; f__Burkholderiaceae
OTU_930	0	0	0	0	0	0	0	0	0	0	0	0	0	k__Bacteria; p__Bacteroidetes; c__Bacteroidia; o__Bacteroidales; f__Muribaculaceae; g__uncultured bacterium; s__uncultured bacterium
OTU_420	0	0	0	0	0	0	0	0	0	1	0	0	0	k__Bacteria; p__Proteobacteria; c__Alphaproteobacteria; o__Sphingomonadales; f__Sphingomonadaceae; g__Sphingomonas
OTU_382	0	0	0	0	0	0	0	0	0	0	0	0	0	k__Bacteria; p__Actinobacteria; c__Actinobacteria; o__Micrococcales; f__Micrococcaceae; g__Enteractinococcus; s__uncultured bacterium
OTU_712	0	0	0	0	0	0	0	0	0	0	0	0	0	k__Bacteria; p__Actinobacteria; c__Coriobacteriia; o__Coriobacteriales; f__uncultured; g__uncultured bacterium; s__uncultured bacterium
OTU_547	0	0	0	0	0	0	0	0	0	0	0	0	0	k__Bacteria; p__Firmicutes; c__Clostridia; o__Clostridiales; f__Lachnospiraceae; g__Coprococcus 2; s__uncultured bacterium
OTU_492	0	0	0	0	0	0	0	0	0	0	0	0	0	k__Bacteria; p__Bacteroidetes; c__Bacteroidia; o__Sphingobacteriales; f__env.OPS 17
OTU_801	0	0	0	0	0	0	0	1	0	0	1	0	0	k__Bacteria; p__Firmicutes; c__Clostridia; o__Clostridiales; f__Lachnospiraceae; g__Lachnospiraceae UCG-001; s__uncultured bacterium
OTU_571	0	0	0	0	0	0	0	0	0	0	0	0	0	k__Bacteria; p__Firmicutes; c__Clostridia; o__Clostridiales; f__Ruminococcaceae; g__Ruminococcus 1
OTU_306	0	3	6	0	6	6	16	0	0	40	0	0	1	k__Bacteria; p__Firmicutes; c__Clostridia; o__Clostridiales; f__Lachnospiraceae
OTU_248	0	0	0	0	0	0	0	0	0	0	0	0	0	k__Bacteria; p__Proteobacteria; c__Gammaproteobacteria; o__Pseudomonadales; f__Moraxellaceae; g__uncultured; s__metagenome
OTU_277	0	0	0	0	0	2	27	0	1	1	0	1	3	k__Bacteria; p__Firmicutes; c__Clostridia; o__Clostridiales; f__Ruminococcaceae
OTU_385	0	0	1	0	0	0	0	6	0	0	0	0	0	k__Bacteria; p__Proteobacteria; c__Alphaproteobacteria; o__Rhizobiales; f__Xanthobacteraceae; g__uncultured
OTU_1436	0	0	0	0	0	0	3	0	0	3	0	2	0	k__Bacteria; p__Firmicutes; c__Clostridia; o__Clostridiales; f__Ruminococcaceae; g__Ruminiclostridium 5; s__uncultured bacterium
OTU_633	0	0	0	0	0	0	0	0	0	0	0	0	0	k__Bacteria; p__Proteobacteria; c__Deltaproteobacteria; o__NB1-j
OTU_388	0	0	0	0	0	0	0	0	0	0	0	0	0	k__Bacteria; p__Firmicutes; c__Clostridia; o__Clostridiales; f__Ruminococcaceae; g__[Eubacterium] coprostanoligenes group
OTU_728	0	0	0	0	0	0	0	0	0	0	0	0	0	k__Bacteria; p__Actinobacteria; c__Acidimicrobiia; o__IMCC26256
OTU_481	0	0	0	0	0	0	0	0	0	0	0	0	0	k__Bacteria; p__Proteobacteria; c__Gammaproteobacteria; o__Xanthomonadales; f__Xanthomonadaceae; g__Luteimonas; s__Luteimonas tolerans
OTU_2687	0	0	0	0	0	0	0	0	0	0	0	0	3	k__Bacteria; p__Proteobacteria; c__Gammaproteobacteria; o__Pseudomonadales; f__Pseudomonadaceae; g__Pseudomonas; s__Pseudomonas fulva
OTU_575	0	0	0	0	0	0	0	0	0	0	0	0	0	k__Bacteria; p__Actinobacteria
OTU_299	0	0	0	0	0	0	9	0	0	0	0	0	0	k__Bacteria; p__Firmicutes; c__Erysipelotrichia; o__Erysipelotrichales; f__Erysipelotrichaceae; g__Dubosiella; s__uncultured bacterium
OTU_634	0	0	0	0	0	0	0	0	0	0	0	0	0	k__Bacteria; p__Firmicutes; c__Bacilli; o__Bacillales; f__Thermoactinomycetaceae; g__Kroppenstedtia; s__uncultured Kroppenstedtia sp.
OTU_617	0	0	0	0	0	0	0	0	0	0	0	0	0	k__Bacteria; p__Bacteroidetes; c__Bacteroidia; o__Bacteroidales; f__Prevotellaceae; g__Prevotella 1; s__unidentified rumen bacterium 12-132
OTU_92	1	14	10	0	1	68	322	7	0	0	1	0	7	k__Bacteria; p__Firmicutes; c__Clostridia; o__Clostridiales; f__Lachnospiraceae; g__ASF356; s__uncultured bacterium
OTU_316	0	0	0	0	0	5	10	1	0	0	0	0	1	k__Bacteria; p__Cyanobacteria; c__Oxyphotobacteria; o__Chloroplast
OTU_396	0	0	0	0	0	14	0	0	0	0	0	0	0	k__Bacteria; p__Firmicutes; c__Clostridia; o__Clostridiales; f__Lachnospiraceae; g__uncultured
OTU_327	0	0	0	0	0	0	5	4	1	0	0	0	1	k__Bacteria; p__Firmicutes; c__Clostridia; o__Clostridiales; f__Lachnospiraceae; g__Anaerostipes; s__uncultured organism
OTU_267	1	3	0	0	0	14	1	7	0	5	0	0	1	k__Bacteria; p__Firmicutes; c__Clostridia; o__Clostridiales; f__Lachnospiraceae
OTU_548	0	0	0	0	0	0	0	3	0	0	0	0	0	k__Bacteria; p__Proteobacteria; c__Gammaproteobacteria; o__Aeromonadales; f__Aeromonadaceae; g__Aeromonas
OTU_568	0	0	0	0	0	0	0	0	0	0	0	0	0	k__Bacteria; p__Firmicutes; c__Clostridia; o__Clostridiales; f__Ruminococcaceae
OTU_865	0	0	0	0	0	0	0	0	0	0	0	0	0	k__Bacteria; p__Actinobacteria; c__Actinobacteria; o__Micrococcales; f__Microbacteriaceae
OTU_565	0	0	0	0	0	0	0	0	0	0	0	0	0	k__Bacteria; p__Firmicutes; c__Negativicutes; o__Selenomonadales; f__Veillonellaceae; g__Megasphaera; s__uncultured Megasphaera sp.
OTU_409	0	0	0	0	0	0	0	2	0	0	0	0	0	k__Bacteria; p__Firmicutes; c__Clostridia; o__Clostridiales; f__Lachnospiraceae; g__uncultured; s__uncultured Clostridiales bacterium
OTU_554	0	0	0	0	0	0	0	0	0	0	0	0	0	k__Bacteria; p__Acidobacteria; c__Blastocatellia (Subgroup 4); o__Pyrinomonadales; f__Pyrinomonadaceae; g__RB41
OTU_225	0	0	0	0	0	0	3	0	1	0	0	0	0	k__Bacteria; p__Proteobacteria; c__Gammaproteobacteria; o__Betaproteobacteriales; f__Burkholderiaceae; g__Acidovorax
OTU_495	0	0	0	0	0	0	0	0	0	0	0	0	0	k__Bacteria; p__Actinobacteria; c__Thermoleophilia; o__Solirubrobacterales; f__67-14; g__uncultured actinobacterium; s__uncultured actinobacterium
OTU_651	0	0	0	0	0	0	0	0	0	0	0	0	0	k__Bacteria; p__Proteobacteria; c__Alphaproteobacteria; o__Dongiales; f__Dongiaceae; g__Dongia; s__uncultured bacterium
OTU_806	0	0	0	0	0	0	3	1	0	0	0	0	0	k__Bacteria; p__Bacteroidetes; c__Bacteroidia; o__Bacteroidales; f__Marinifilaceae; g__Odoribacter; s__gut metagenome
OTU_599	0	0	0	0	0	0	0	0	0	0	0	0	0	k__Bacteria; p__Proteobacteria; c__Gammaproteobacteria; o__Betaproteobacteriales; f__Burkholderiaceae
OTU_808	0	0	0	0	0	0	0	0	0	0	0	0	0	k__Bacteria; p__Bacteroidetes; c__Bacteroidia; o__Cytophagales; f__Hymenobacteraceae; g__Pontibacter
OTU_474	0	4	0	0	0	7	0	6	0	0	0	0	0	k__Bacteria; p__Firmicutes; c__Clostridia; o__Clostridiales; f__Lachnospiraceae; g__uncultured; s__uncultured bacterium
OTU_760	0	0	0	0	0	0	0	0	0	0	0	0	0	k__Bacteria; p__Actinobacteria; c__Thermoleophilia; o__Solirubrobacterales; f__Solirubrobacteraceae; g__Parviterribacter; s__uncultured bacterium
OTU_616	0	0	0	0	0	0	0	0	0	0	0	0	0	k__Bacteria; p__Firmicutes; c__Clostridia; o__Clostridiales; f__Lachnospiraceae; g__Lachnospira
OTU_1150	8	0	1	0	2	0	0	0	2	0	0	0	0	k__Bacteria; p__Bacteroidetes; c__Bacteroidia; o__Bacteroidales; f__Muribaculaceae; g__uncultured bacterium; s__uncultured bacterium
OTU_560	0	0	0	0	0	0	0	0	0	0	0	0	0	k__Bacteria; p__Verrucomicrobia; c__Verrucomicrobiae; o__Chthoniobacterales; f__Chthoniobacteraceae; g__Candidatus Udaeobacter; s__uncultured bacterium
OTU_573	0	0	0	0	0	0	0	0	0	0	0	0	0	k__Bacteria; p__Proteobacteria; c__Deltaproteobacteria; o__Myxococcales; f__Polyangiaceae; g__Sorangium; s__metagenome
OTU_428	0	0	0	0	0	0	0	0	0	0	0	0	0	k__Bacteria; p__Firmicutes; c__Bacilli; o__Lactobacillales; f__Streptococcaceae; g__Streptococcus
OTU_430	0	0	0	0	0	0	0	0	0	0	0	0	0	k__Bacteria; p__Firmicutes; c__Clostridia; o__Clostridiales; f__Lachnospiraceae; g__Blautia
OTU_551	0	0	0	0	0	0	3	0	0	0	0	0	0	k__Bacteria; p__Bacteroidetes; c__Bacteroidia; o__Bacteroidales; f__Rikenellaceae; g__Rikenellaceae RC9 gut group; s__uncultured bacterium
OTU_218	1	0	0	0	0	0	0	1	0	0	0	0	1	k__Bacteria; p__Proteobacteria; c__Alphaproteobacteria; o__Rhizobiales; f__Xanthobacteraceae; g__uncultured
OTU_755	0	0	0	0	0	0	0	0	0	0	0	0	0	k__Bacteria; p__Proteobacteria; c__Alphaproteobacteria; o__Rickettsiales; f__Mitochondria; g__Spongospora subterranea; s__Spongospora subterranea
OTU_689	0	0	0	0	0	0	0	0	0	0	0	0	0	k__Bacteria; p__Proteobacteria; c__Alphaproteobacteria; o__Acetobacterales; f__Acetobacteraceae; g__Acetobacter
OTU_331	0	0	0	0	0	0	0	0	0	0	0	0	0	k__Bacteria; p__Actinobacteria; c__Actinobacteria; o__Micrococcales; f__Microbacteriaceae; g__Agromyces
OTU_508	0	0	0	0	0	0	0	0	0	0	0	0	0	k__Bacteria; p__Bacteroidetes; c__Bacteroidia; o__Flavobacteriales; f__Flavobacteriaceae; g__Flavobacterium
OTU_494	0	0	0	0	0	0	0	0	0	0	0	0	0	k__Bacteria; p__Proteobacteria; c__Gammaproteobacteria; o__Gammaproteobacteria Incertae Sedis; f__Unknown Family; g__Acidibacter
OTU_809	0	12	0	0	0	6	0	3	0	1	0	0	0	k__Bacteria; p__Firmicutes; c__Clostridia; o__Clostridiales; f__Lachnospiraceae
OTU_626	0	0	0	0	0	0	0	0	0	0	0	0	0	k__Bacteria; p__Proteobacteria; c__Alphaproteobacteria; o__Sphingomonadales; f__Sphingomonadaceae; g__Ellin6055; s__metagenome
OTU_725	0	0	0	0	0	0	0	0	0	1	0	0	0	k__Bacteria; p__Bacteroidetes; c__Bacteroidia; o__Bacteroidales; f__Muribaculaceae; g__uncultured bacterium; s__uncultured bacterium
OTU_512	0	0	0	0	0	0	0	0	0	0	0	0	0	k__Bacteria; p__Bacteroidetes; c__Bacteroidia; o__Bacteroidales
OTU_708	0	0	0	0	0	0	0	0	0	0	0	0	0	k__Bacteria; p__Actinobacteria; c__Acidimicrobiia
OTU_326	1	0	0	0	0	0	0	0	0	0	0	0	3	k__Bacteria; p__Firmicutes; c__Clostridia; o__Clostridiales; f__Lachnospiraceae; g__Lachnospira; s__uncultured bacterium
OTU_700	0	0	0	1	0	0	0	0	0	0	0	0	0	k__Bacteria; p__Firmicutes; c__Erysipelotrichia; o__Erysipelotrichales; f__Erysipelotrichaceae; g__Allobaculum; s__uncultured bacterium
OTU_2723	1	0	0	0	0	0	0	0	1	0	0	0	0	k__Bacteria; p__Bacteroidetes; c__Bacteroidia; o__Bacteroidales; f__Muribaculaceae
OTU_574	0	0	0	0	0	0	0	0	0	0	0	0	0	k__Bacteria; p__Firmicutes; c__Bacilli; o__Lactobacillales; f__Carnobacteriaceae; g__Atopostipes; s__uncultured bacterium
OTU_1250	0	0	0	0	0	0	0	0	0	0	0	0	0	k__Bacteria; p__Bacteroidetes; c__Bacteroidia; o__Bacteroidales
OTU_451	0	0	0	0	0	0	0	0	0	0	0	0	1	k__Bacteria; p__Chloroflexi; c__KD4-96
OTU_453	0	0	0	0	0	0	0	0	0	0	1	0	7	k__Bacteria; p__Actinobacteria; c__Actinobacteria; o__Micrococcales; f__Micrococcaceae; g__Pseudarthrobacter
OTU_1831	0	0	0	0	0	0	0	0	0	0	0	0	0	k__Bacteria; p__Firmicutes; c__Clostridia; o__Clostridiales; f__Lachnospiraceae; g__Lachnospira
OTU_503	0	0	0	0	0	0	0	0	0	0	0	0	0	k__Bacteria; p__Planctomycetes; c__Planctomycetacia; o__Gemmatales; f__Gemmataceae; g__uncultured
OTU_665	0	2	4	1	0	3	0	2	0	0	0	0	1	k__Bacteria; p__Actinobacteria; c__Actinobacteria; o__Frankiales; f__Geodermatophilaceae; g__Geodermatophilus
OTU_514	0	0	0	0	0	2	0	1	0	0	0	1	0	k__Bacteria; p__Firmicutes; c__Clostridia; o__Clostridiales; f__Lachnospiraceae; g__Lachnospiraceae ND3007 group; s__uncultured bacterium
OTU_670	0	0	0	0	0	0	0	0	0	0	0	0	0	k__Bacteria; p__Firmicutes; c__Clostridia; o__Clostridiales; f__Lachnospiraceae; g__Lachnospiraceae NK4A136 group; s__uncultured bacterium
OTU_916	0	0	0	0	0	3	0	0	0	0	0	0	3	k__Bacteria; p__Firmicutes; c__Clostridia; o__Clostridiales; f__Lachnospiraceae
OTU_671	0	0	0	0	0	0	0	0	0	0	0	0	0	k__Bacteria; p__Firmicutes; c__Bacilli; o__Lactobacillales; f__Lactobacillaceae; g__Lactobacillus
OTU_786	0	0	0	0	0	0	0	0	0	0	0	0	0	k__Bacteria; p__Firmicutes; c__Clostridia; o__Clostridiales; f__Lachnospiraceae
OTU_534	0	0	0	0	0	0	0	0	0	0	0	0	0	k__Bacteria; p__Proteobacteria; c__Alphaproteobacteria; o__Tistrellales; f__Geminicoccaceae; g__uncultured; s__uncultured bacterium
OTU_553	0	0	0	0	0	0	0	0	0	0	0	0	0	k__Bacteria; p__Actinobacteria; c__Thermoleophilia; o__Gaiellales; f__uncultured; g__uncultured bacterium; s__uncultured bacterium
OTU_460	0	0	0	0	0	0	0	0	0	0	0	0	0	k__Bacteria; p__Gemmatimonadetes; c__Gemmatimonadetes; o__Gemmatimonadales; f__Gemmatimonadaceae; g__Gemmatimonas
OTU_585	0	1	0	0	0	1	4	4	0	0	0	0	2	k__Bacteria; p__Firmicutes; c__Clostridia; o__Clostridiales; f__Ruminococcaceae; g__Ruminococcus 1; s__uncultured Ruminococcus sp.
OTU_669	0	0	0	0	0	0	0	0	0	0	0	0	0	k__Bacteria; p__Actinobacteria; c__Actinobacteria; o__Propionibacteriales; f__Nocardioidaceae; g__Nocardioides; s__uncultured bacterium
OTU_695	0	0	0	0	0	0	0	0	0	0	0	0	0	k__Bacteria; p__Proteobacteria; c__Alphaproteobacteria; o__Acetobacterales; f__Acetobacteraceae; g__Craurococcus
OTU_698	0	0	0	0	0	0	0	0	0	0	0	0	0	k__Bacteria; p__BRC1; c__uncultured Acidobacteria bacterium; o__uncultured Acidobacteria bacterium; f__uncultured Acidobacteria bacterium; g__uncultured Acidobacteria bacterium; s__uncultured Acidobacteria bacterium
OTU_744	0	0	0	0	0	0	0	0	0	0	0	0	0	k__Bacteria; p__Proteobacteria; c__Deltaproteobacteria; o__Oligoflexales; f__Oligoflexaceae; g__uncultured
OTU_456	1	0	0	0	0	0	14	0	0	0	0	0	0	k__Bacteria; p__Actinobacteria; c__Thermoleophilia; o__Gaiellales; f__uncultured; g__uncultured bacterium; s__uncultured bacterium
OTU_693	0	0	0	0	0	0	0	0	0	0	0	0	0	k__Bacteria; p__Proteobacteria; c__Gammaproteobacteria; o__Betaproteobacteriales; f__Burkholderiaceae
OTU_343	0	0	0	0	0	0	0	0	0	0	0	2	0	k__Bacteria; p__Actinobacteria; c__Actinobacteria; o__Micrococcales; f__Intrasporangiaceae
OTU_706	0	0	0	0	0	0	0	1	0	0	0	0	0	k__Bacteria; p__Acidobacteria; c__Subgroup 6
OTU_1040	1	0	1	0	0	0	0	0	0	0	0	0	0	k__Bacteria; p__Chloroflexi; c__KD4-96
OTU_238	0	0	0	0	0	0	0	2	0	0	0	0	0	k__Bacteria; p__Bacteroidetes; c__Bacteroidia; o__Bacteroidales; f__Muribaculaceae; g__uncultured bacterium; s__uncultured bacterium
OTU_405	0	0	0	0	0	0	0	0	0	0	0	0	0	k__Bacteria; p__Patescibacteria; c__Saccharimonadia; o__Saccharimonadales
OTU_718	0	0	0	0	0	0	0	0	0	0	0	0	0	k__Bacteria; p__Actinobacteria; c__Thermoleophilia; o__Solirubrobacterales; f__Solirubrobacteraceae; g__Solirubrobacter; s__uncultured bacterium
OTU_889	0	0	0	0	0	0	0	2	0	0	0	0	0	k__Bacteria; p__Firmicutes; c__Clostridia; o__Clostridiales; f__Lachnospiraceae; g__uncultured; s__uncultured bacterium
OTU_702	0	0	0	0	0	0	0	0	0	0	0	0	0	k__Bacteria; p__Bacteroidetes; c__Bacteroidia; o__Chitinophagales; f__Chitinophagaceae; g__uncultured; s__metagenome
OTU_776	0	0	0	0	0	0	0	0	0	0	0	0	0	k__Bacteria; p__Bacteroidetes; c__Bacteroidia; o__Chitinophagales; f__Chitinophagaceae; g__uncultured; s__bacterium
OTU_163	0	0	0	0	0	0	8	33	10	0	0	0	0	k__Bacteria; p__Bacteroidetes; c__Bacteroidia; o__Bacteroidales; f__Muribaculaceae; g__uncultured bacterium; s__uncultured bacterium
OTU_678	0	0	0	0	0	0	0	0	0	1	0	0	0	k__Bacteria; p__Proteobacteria; c__Gammaproteobacteria; o__Betaproteobacteriales; f__Nitrosomonadaceae; g__MND1; s__uncultured bacterium
OTU_667	0	0	0	0	0	0	0	0	0	0	0	0	0	k__Bacteria; p__Firmicutes; c__Clostridia; o__Clostridiales; f__Lachnospiraceae
OTU_1058	0	0	0	0	0	0	0	0	0	0	0	0	0	k__Bacteria; p__Tenericutes; c__Mollicutes; o__Mollicutes RF39
OTU_442	0	0	0	0	0	0	0	0	0	0	0	0	0	k__Bacteria; p__Acidobacteria; c__Subgroup 17
OTU_753	0	0	0	0	0	0	0	0	0	0	0	0	0	k__Bacteria; p__Proteobacteria; c__Deltaproteobacteria; o__Bdellovibrionales; f__Bacteriovoracaceae; g__Peredibacter
OTU_414	0	0	0	0	0	0	0	0	0	0	0	0	0	k__Bacteria; p__Proteobacteria; c__Alphaproteobacteria; o__Rhizobiales; f__Beijerinckiaceae; g__Methylobacterium; s__Methylobacterium radiotolerans
OTU_804	0	0	1	0	0	0	0	0	0	0	0	0	0	k__Bacteria; p__Firmicutes; c__Clostridia; o__Clostridiales; f__Christensenellaceae; g__Christensenellaceae R-7 group; s__uncultured prokaryote
OTU_879	2	1	1	0	1	1	3	0	0	0	0	1	0	k__Bacteria; p__Firmicutes; c__Negativicutes; o__Selenomonadales; f__Veillonellaceae; g__Veillonella; s__uncultured bacterium
OTU_677	0	0	0	0	0	0	0	0	0	0	0	0	0	k__Bacteria; p__Entotheonellaeota; c__Entotheonellia; o__Entotheonellales; f__Entotheonellaceae
OTU_687	0	0	0	0	0	0	0	0	0	0	0	0	0	k__Bacteria; p__Firmicutes; c__Clostridia; o__Clostridiales; f__Lachnospiraceae; g__uncultured
OTU_727	0	0	1	0	0	1	0	0	0	0	0	0	0	k__Bacteria; p__Firmicutes; c__Clostridia; o__Clostridiales; f__Lachnospiraceae
OTU_787	0	0	0	0	0	0	0	0	0	0	0	0	0	k__Bacteria; p__Firmicutes; c__Erysipelotrichia; o__Erysipelotrichales; f__Erysipelotrichaceae; g__Allobaculum
OTU_1032	0	0	0	0	0	0	0	0	0	0	0	0	0	k__Bacteria; p__Actinobacteria; c__Coriobacteriia; o__Coriobacteriales; f__Eggerthellaceae; g__uncultured; s__uncultured bacterium
OTU_467	0	0	0	0	0	0	0	0	0	0	0	0	0	k__Bacteria; p__Proteobacteria; c__Alphaproteobacteria; o__Caulobacterales; f__Caulobacteraceae; g__Phenylobacterium; s__uncultured bacterium
OTU_780	0	0	0	0	0	0	0	0	0	0	0	0	0	k__Bacteria; p__Cyanobacteria; c__Oxyphotobacteria; o__Chloroplast; f__Poterioochromonas sp. DS; g__Poterioochromonas sp. DS; s__Poterioochromonas sp. DS
OTU_535	0	0	0	0	0	0	0	0	0	0	0	0	0	k__Bacteria; p__Actinobacteria; c__Thermoleophilia; o__Solirubrobacterales; f__67-14; g__uncultured bacterium; s__uncultured bacterium
OTU_1144	0	0	0	0	0	0	0	0	0	1	0	0	0	k__Bacteria; p__Proteobacteria; c__Gammaproteobacteria; o__KF-JG30-C25; f__uncultured proteobacterium; g__uncultured proteobacterium; s__uncultured proteobacterium
OTU_458	0	0	0	0	0	0	0	0	0	0	0	0	0	k__Bacteria; p__Proteobacteria; c__Gammaproteobacteria; o__Betaproteobacteriales; f__Burkholderiaceae
OTU_807	0	0	0	0	0	0	0	2	0	0	0	0	0	k__Bacteria; p__Tenericutes; c__Mollicutes; o__Mollicutes RF39; f__uncultured bacterium; g__uncultured bacterium; s__uncultured bacterium
OTU_578	0	0	0	0	0	0	0	0	0	0	0	0	0	k__Bacteria; p__Actinobacteria; c__Thermoleophilia; o__Solirubrobacterales; f__67-14; g__uncultured bacterium; s__uncultured bacterium
OTU_862	0	0	0	0	0	0	0	0	0	0	0	0	0	k__Bacteria; p__Proteobacteria; c__Alphaproteobacteria; o__Paracaedibacterales; f__Paracaedibacteraceae; g__Candidatus Paracaedibacter; s__uncultured bacterium
OTU_621	0	0	0	0	0	0	0	0	0	0	0	0	0	k__Bacteria; p__Proteobacteria; c__Gammaproteobacteria; o__Betaproteobacteriales; f__Burkholderiaceae; g__Cupriavidus
OTU_415	1	0	0	0	0	0	0	0	0	0	0	0	0	k__Bacteria; p__Proteobacteria; c__Alphaproteobacteria; o__Rhizobiales; f__Devosiaceae; g__Devosia
OTU_603	0	0	0	0	0	0	0	0	0	0	0	0	0	k__Bacteria; p__Synergistetes; c__Synergistia; o__Synergistales; f__Synergistaceae; g__Synergistes; s__uncultured organism
OTU_69	972	0	0	0	1	0	44	1	0	0	0	0	0	k__Bacteria; p__Verrucomicrobia; c__Verrucomicrobiae; o__Verrucomicrobiales; f__Akkermansiaceae; g__Akkermansia; s__uncultured bacterium
OTU_597	0	0	0	0	0	0	0	0	0	0	0	0	0	k__Bacteria; p__Proteobacteria; c__Deltaproteobacteria; o__Myxococcales; f__Haliangiaceae; g__Haliangium
OTU_411	0	0	0	0	0	0	0	0	2	0	1	0	0	k__Bacteria; p__Actinobacteria; c__Thermoleophilia; o__Gaiellales; f__uncultured
OTU_583	0	0	0	0	0	0	0	0	0	0	0	0	0	k__Bacteria; p__Actinobacteria; c__Thermoleophilia; o__Gaiellales; f__Gaiellaceae; g__Gaiella; s__uncultured bacterium
OTU_1659	0	0	0	0	0	0	0	0	0	0	0	0	1	k__Bacteria; p__Firmicutes; c__Clostridia; o__Clostridiales; f__Lachnospiraceae
OTU_618	0	0	0	0	0	0	0	0	0	0	0	0	0	k__Bacteria; p__Acidobacteria; c__Subgroup 17; o__uncultured Acidobacteria bacterium; f__uncultured Acidobacteria bacterium; g__uncultured Acidobacteria bacterium; s__uncultured Acidobacteria bacterium
OTU_739	0	1	0	0	0	0	0	0	0	0	0	1	0	k__Bacteria; p__Proteobacteria; c__Gammaproteobacteria; o__Betaproteobacteriales; f__Burkholderiaceae; g__Sutterella
OTU_608	0	0	0	0	0	0	0	0	0	0	0	0	1	k__Bacteria; p__Bacteroidetes; c__Bacteroidia; o__Flavobacteriales; f__Flavobacteriaceae; g__Flavobacterium
OTU_1705	3	3	1	4	2	12	0	3	0	0	2	0	0	k__Bacteria; p__Firmicutes; c__Clostridia; o__Clostridiales; f__Lachnospiraceae
OTU_302	0	0	0	0	0	0	0	0	0	0	0	0	0	k__Bacteria; p__Cyanobacteria; c__Oxyphotobacteria; o__Chloroplast
OTU_1067	0	0	0	0	1	0	0	0	0	0	0	0	0	k__Bacteria; p__Firmicutes; c__Clostridia; o__Clostridiales; f__Lachnospiraceae; g__Lachnospiraceae NK4A136 group; s__uncultured bacterium
OTU_866	0	0	0	0	0	0	0	0	0	0	0	0	0	k__Bacteria; p__Bacteroidetes; c__Bacteroidia; o__Bacteroidales; f__Muribaculaceae; g__uncultured bacterium; s__uncultured bacterium
OTU_249	0	0	0	4	0	2	5	3	1	7	0	0	0	k__Bacteria; p__Firmicutes; c__Clostridia; o__Clostridiales; f__Lachnospiraceae; g__uncultured; s__uncultured bacterium
OTU_732	0	0	0	0	0	0	0	0	0	0	0	0	0	k__Bacteria; p__Proteobacteria; c__Gammaproteobacteria; o__Xanthomonadales; f__Xanthomonadaceae; g__Stenotrophomonas
OTU_692	0	0	0	0	0	0	3	0	0	0	0	0	0	k__Bacteria; p__Firmicutes; c__Clostridia; o__Clostridiales; f__Lachnospiraceae
OTU_465	0	1	1	0	0	0	3	6	0	0	0	0	1	k__Bacteria; p__Firmicutes; c__Clostridia; o__Clostridiales; f__Ruminococcaceae; g__Ruminococcaceae UCG-013
OTU_454	0	0	0	0	0	0	0	0	0	0	0	0	0	k__Bacteria; p__Firmicutes; c__Clostridia; o__Clostridiales; f__Lachnospiraceae; g__Lachnospiraceae NK4A136 group; s__uncultured bacterium
OTU_562	0	0	0	0	0	0	5	0	0	0	0	0	0	k__Bacteria; p__Firmicutes; c__Clostridia; o__Clostridiales; f__Lachnospiraceae
OTU_473	0	0	0	0	0	0	0	0	0	0	0	0	0	k__Bacteria; p__Proteobacteria; c__Alphaproteobacteria; o__Rhizobiales; f__Rhizobiaceae; g__Allorhizobium-Neorhizobium-Pararhizobium-Rhizobium; s__Agrobacterium radiobacter
OTU_561	0	0	0	0	0	0	0	0	0	0	0	0	0	k__Bacteria; p__Actinobacteria; c__Actinobacteria; o__Micromonosporales; f__Micromonosporaceae; g__Virgisporangium; s__uncultured bacterium
OTU_581	0	0	0	0	0	0	0	0	0	0	0	0	0	k__Bacteria; p__Fusobacteria; c__Fusobacteriia; o__Fusobacteriales; f__Leptotrichiaceae; g__Leptotrichia
OTU_909	0	0	0	0	0	0	0	0	0	0	0	0	0	k__Bacteria; p__Proteobacteria; c__Alphaproteobacteria; o__Micavibrionales; f__uncultured
OTU_278	0	2	0	0	0	0	0	0	0	0	0	0	0	k__Bacteria; p__Firmicutes; c__Clostridia; o__Clostridiales; f__Lachnospiraceae
OTU_754	0	0	0	0	0	8	0	0	0	0	0	0	0	k__Bacteria; p__Firmicutes; c__Clostridia; o__Clostridiales; f__Lachnospiraceae; g__uncultured
OTU_950	0	0	0	0	0	0	0	0	0	0	0	0	0	k__Bacteria; p__Tenericutes; c__Mollicutes; o__Mollicutes RF39; f__uncultured bacterium; g__uncultured bacterium; s__uncultured bacterium
OTU_1937	0	1	0	0	0	0	0	0	0	0	0	0	0	k__Bacteria; p__Firmicutes; c__Clostridia; o__Clostridiales; f__Lachnospiraceae; g__[Ruminococcus] torques group
OTU_523	0	0	0	0	0	0	4	0	0	0	0	0	0	k__Bacteria; p__Bacteroidetes; c__Bacteroidia; o__Bacteroidales; f__Marinifilaceae; g__Odoribacter
OTU_656	0	5	0	1	0	3	5	0	1	0	0	0	1	k__Bacteria; p__Firmicutes; c__Clostridia; o__Clostridiales; f__Ruminococcaceae; g__Ruminiclostridium 5
OTU_1812	0	0	2	0	0	0	0	0	0	0	0	0	0	k__Bacteria; p__Firmicutes; c__Clostridia; o__Clostridiales; f__Lachnospiraceae; g__Roseburia
OTU_1048	0	0	0	0	1	0	0	0	0	0	0	0	0	k__Bacteria; p__Acidobacteria; c__Acidobacteriia; o__Acidobacteriales; f__Acidobacteriaceae (Subgroup 1)
OTU_991	0	0	0	0	0	0	0	0	0	0	0	0	0	k__Bacteria; p__Bacteroidetes; c__Bacteroidia; o__Cytophagales; f__Hymenobacteraceae; g__Hymenobacter; s__uncultured Hymenobacter sp.
OTU_721	0	0	0	0	0	0	0	0	0	0	0	0	0	k__Bacteria; p__Gemmatimonadetes; c__S0134 terrestrial group
OTU_484	0	3	0	0	1	3	0	0	0	6	0	0	0	k__Bacteria; p__Firmicutes; c__Clostridia; o__Clostridiales; f__Ruminococcaceae; g__Ruminococcaceae NK4A214 group; s__uncultured bacterium
OTU_251	0	0	3	0	2	0	0	0	0	0	4	0	0	k__Bacteria; p__Bacteroidetes; c__Bacteroidia; o__Bacteroidales; f__Muribaculaceae; g__uncultured bacterium; s__uncultured bacterium
OTU_213	0	0	0	0	0	0	5	33	3	0	0	0	0	k__Bacteria; p__Bacteroidetes; c__Bacteroidia; o__Bacteroidales; f__Muribaculaceae; g__uncultured bacterium; s__uncultured bacterium
OTU_798	0	0	0	0	0	0	0	0	0	0	0	0	0	k__Bacteria; p__Chloroflexi; c__Chloroflexia; o__Chloroflexales; f__Roseiflexaceae; g__uncultured; s__uncultured bacterium
OTU_480	0	0	0	0	0	0	0	0	0	0	0	0	0	k__Bacteria; p__Firmicutes; c__Clostridia; o__Clostridiales; f__Clostridiaceae 1
OTU_815	0	0	0	0	0	0	0	0	0	0	0	0	1	k__Bacteria; p__Proteobacteria; c__Gammaproteobacteria; o__Xanthomonadales; f__Xanthomonadaceae
OTU_653	0	0	0	0	0	0	0	0	0	0	0	0	0	k__Bacteria; p__Bacteroidetes; c__Bacteroidia; o__Bacteroidales; f__Prevotellaceae; g__Prevotella 1; s__uncultured rumen bacterium
OTU_655	0	0	0	0	0	0	0	1	1	0	0	0	0	k__Bacteria; p__Firmicutes; c__Clostridia; o__Clostridiales; f__Ruminococcaceae; g__Ruminococcaceae UCG-014
OTU_1447	0	0	0	0	0	0	0	0	1	0	0	0	0	k__Bacteria; p__Firmicutes; c__Clostridia; o__Clostridiales; f__Lachnospiraceae; g__Lachnospiraceae NK4A136 group
OTU_680	0	0	0	0	0	0	0	0	0	0	0	0	0	k__Bacteria; p__Proteobacteria; c__Deltaproteobacteria; o__NB1-j; f__uncultured bacterium; g__uncultured bacterium; s__uncultured bacterium
OTU_903	0	0	0	0	0	0	0	0	0	0	0	0	0	k__Bacteria; p__Bacteroidetes; c__Bacteroidia; o__Flavobacteriales; f__Weeksellaceae; g__Chryseobacterium
OTU_631	0	0	0	0	0	0	0	0	0	0	0	0	0	k__Bacteria; p__Actinobacteria; c__Actinobacteria
OTU_461	0	0	0	0	0	0	0	0	0	0	0	0	0	k__Bacteria; p__Proteobacteria; c__Alphaproteobacteria; o__Elsterales; f__uncultured
OTU_1451	0	0	0	0	0	0	0	0	0	0	0	0	0	k__Bacteria; p__Proteobacteria; c__Gammaproteobacteria; o__Betaproteobacteriales; f__Burkholderiaceae; g__Massilia; s__uncultured bacterium
OTU_1138	0	0	0	0	0	0	0	0	0	0	0	0	0	k__Bacteria; p__Tenericutes; c__Mollicutes; o__Mollicutes RF39
OTU_532	0	0	0	0	0	0	0	0	0	0	0	0	0	k__Bacteria; p__Bacteroidetes; c__Bacteroidia; o__Chitinophagales; f__Chitinophagaceae; g__uncultured
OTU_838	0	0	0	0	0	0	0	0	0	0	0	0	0	k__Bacteria; p__Actinobacteria; c__Actinobacteria; o__Micromonosporales; f__Micromonosporaceae; g__Actinoplanes; s__uncultured bacterium
OTU_868	0	0	0	0	0	0	0	0	0	0	0	0	0	k__Bacteria; p__Proteobacteria; c__Alphaproteobacteria; o__Acetobacterales; f__Acetobacteraceae; g__Gluconobacter
OTU_688	0	0	0	0	0	0	0	0	0	0	0	0	0	k__Bacteria; p__Actinobacteria; c__Thermoleophilia; o__Gaiellales; f__uncultured; g__uncultured bacterium; s__uncultured bacterium
OTU_977	0	0	0	0	0	0	0	0	0	0	0	0	1	k__Bacteria; p__Proteobacteria; c__Deltaproteobacteria; o__Desulfovibrionales; f__Desulfovibrionaceae; g__Bilophila; s__gut metagenome
OTU_1396	0	0	0	0	0	0	0	0	0	0	0	0	0	k__Bacteria; p__Tenericutes; c__Mollicutes; o__Mollicutes RF39
OTU_758	0	0	0	0	0	0	0	0	0	0	0	0	0	k__Bacteria; p__Bacteroidetes; c__Bacteroidia
OTU_1007	0	0	0	0	0	0	0	0	0	0	0	0	0	k__Bacteria; p__Actinobacteria; c__Coriobacteriia; o__Coriobacteriales
OTU_871	0	0	0	0	0	0	1	0	0	0	0	0	0	k__Bacteria; p__Proteobacteria; c__Alphaproteobacteria; o__Reyranellales; f__Reyranellaceae; g__Reyranella
OTU_710	0	0	0	0	0	0	0	1	0	0	0	0	0	k__Bacteria; p__Firmicutes; c__Bacilli; o__Lactobacillales; f__Lactobacillaceae; g__Lactobacillus; s__Lactobacillus rennini DSM 20253
OTU_1457	0	0	0	0	0	0	0	0	0	0	0	0	0	k__Bacteria; p__Actinobacteria; c__Actinobacteria; o__Propionibacteriales; f__Nocardioidaceae; g__Nocardioides; s__uncultured bacterium
OTU_2557	0	0	0	0	0	0	0	0	0	0	0	0	0	k__Bacteria; p__Firmicutes; c__Clostridia; o__Clostridiales; f__Lachnospiraceae
OTU_367	0	0	0	0	0	0	0	3	0	0	0	0	0	k__Bacteria; p__Deinococcus-Thermus; c__Deinococci; o__Deinococcales; f__Deinococcaceae; g__Deinococcus
OTU_357	2	0	0	2	0	0	1	0	0	0	0	1	0	k__Bacteria; p__Actinobacteria; c__Actinobacteria; o__Propionibacteriales; f__Propionibacteriaceae; g__Cutibacterium
OTU_1445	0	0	0	0	0	0	0	0	0	0	0	0	0	k__Bacteria; p__Tenericutes; c__Mollicutes; o__Mollicutes RF39; f__uncultured rumen bacterium; g__uncultured rumen bacterium; s__uncultured rumen bacterium
OTU_999	0	0	0	0	0	0	0	0	2	0	0	0	0	k__Bacteria; p__Actinobacteria; c__Acidimicrobiia; o__Microtrichales; f__Ilumatobacteraceae; g__Ilumatobacter; s__uncultured bacterium
OTU_604	1	0	15	0	0	0	0	5	4	0	0	0	0	k__Bacteria; p__Tenericutes; c__Mollicutes; o__Mollicutes RF39
OTU_990	0	0	0	0	0	0	0	1	0	0	0	0	0	k__Bacteria; p__Firmicutes; c__Clostridia; o__Clostridiales; f__Christensenellaceae; g__Christensenellaceae R-7 group; s__gut metagenome
OTU_1294	0	0	0	0	17	0	0	0	0	36	4	0	0	k__Bacteria; p__Firmicutes; c__Clostridia; o__Clostridiales; f__Lachnospiraceae; g__Lachnospiraceae NK4A136 group
OTU_577	0	0	0	0	0	0	0	0	1	0	0	0	0	k__Bacteria; p__Bacteroidetes; c__Bacteroidia; o__Bacteroidales; f__Muribaculaceae; g__uncultured bacterium; s__uncultured bacterium
OTU_882	1	0	0	0	0	0	0	0	0	0	0	0	0	k__Bacteria; p__Firmicutes; c__Clostridia; o__Clostridiales; f__Ruminococcaceae; g__Ruminococcaceae UCG-014
OTU_1281	0	8	0	0	0	3	1	0	0	0	1	0	0	k__Bacteria; p__Firmicutes; c__Clostridia; o__Clostridiales; f__Ruminococcaceae
OTU_800	0	0	0	0	0	0	2	4	4	0	0	0	0	k__Bacteria; p__Firmicutes; c__Bacilli; o__Bacillales; f__Planococcaceae; g__Kurthia; s__uncultured bacterium
OTU_325	0	0	0	0	0	0	0	0	0	0	0	0	0	k__Bacteria; p__Bacteroidetes; c__Bacteroidia; o__Flavobacteriales; f__Weeksellaceae; g__Chryseobacterium; s__uncultured bacterium
OTU_684	0	0	0	1	1	0	0	0	0	1	0	0	4	k__Bacteria; p__Bacteroidetes; c__Bacteroidia; o__Bacteroidales; f__Prevotellaceae; g__Prevotella; s__Prevotella bivia DSM 20514
OTU_720	0	0	0	0	0	0	0	0	0	0	0	0	0	k__Bacteria; p__Proteobacteria; c__Gammaproteobacteria; o__Xanthomonadales; f__Xanthomonadaceae; g__Arenimonas; s__uncultured bacterium
OTU_668	0	0	0	0	0	0	0	0	0	0	0	0	0	k__Bacteria; p__Firmicutes; c__Bacilli
OTU_1008	0	0	0	0	0	0	0	0	0	0	0	0	0	k__Bacteria; p__Firmicutes; c__Clostridia; o__Clostridiales; f__Lachnospiraceae; g__[Eubacterium] ruminantium group; s__uncultured bacterium
OTU_425	0	0	0	0	0	0	0	0	0	0	0	0	0	k__Bacteria; p__Proteobacteria; c__Alphaproteobacteria; o__Sphingomonadales; f__Sphingomonadaceae; g__Sphingomonas
OTU_1135	0	0	0	0	0	0	0	0	0	0	0	0	0	k__Bacteria; p__Proteobacteria; c__Deltaproteobacteria; o__Bdellovibrionales; f__Bdellovibrionaceae; g__Bdellovibrio
OTU_1109	0	0	0	0	0	0	0	0	0	0	0	0	0	k__Bacteria; p__Firmicutes; c__Clostridia; o__Clostridiales; f__Lachnospiraceae; g__Coprococcus 1
OTU_1100	0	0	0	0	0	0	0	0	0	0	0	0	0	k__Bacteria; p__Firmicutes; c__Clostridia; o__Clostridiales; f__Ruminococcaceae
OTU_1055	0	0	0	0	0	0	0	0	0	0	0	0	0	k__Bacteria; p__Bacteroidetes; c__Bacteroidia; o__Sphingobacteriales; f__env.OPS 17
OTU_784	0	0	0	0	0	0	0	0	0	0	0	0	0	k__Bacteria; p__Bacteroidetes; c__Bacteroidia; o__Flavobacteriales; f__Weeksellaceae; g__Moheibacter; s__uncultured bacterium
OTU_705	0	0	0	0	0	0	0	0	0	0	0	0	0	k__Bacteria; p__Bacteroidetes; c__Bacteroidia; o__Bacteroidales; f__Prevotellaceae; g__Paraprevotella; s__gut metagenome
OTU_438	0	0	0	0	0	0	0	0	0	0	0	0	0	k__Bacteria; p__Proteobacteria; c__Deltaproteobacteria; o__Bdellovibrionales; f__Bacteriovoracaceae; g__Peredibacter; s__metagenome
OTU_257	0	0	0	4	0	1	10	51	5	0	0	0	0	k__Bacteria; p__Firmicutes; c__Bacilli; o__Bacillales; f__Staphylococcaceae; g__Staphylococcus; s__Staphylococcus sciuri
OTU_2802	0	0	0	0	0	0	0	1	1	0	0	0	0	k__Bacteria; p__Firmicutes; c__Clostridia; o__Clostridiales; f__Ruminococcaceae; g__Ruminococcaceae UCG-014
OTU_863	0	0	0	0	0	0	0	0	0	0	0	0	0	k__Bacteria; p__Bacteroidetes; c__Bacteroidia; o__Flavobacteriales
OTU_444	0	0	0	0	0	0	21	0	0	0	0	0	0	k__Bacteria; p__Proteobacteria; c__Gammaproteobacteria; o__Betaproteobacteriales; f__Burkholderiaceae; g__Sutterella; s__gut metagenome
OTU_951	0	0	1	0	0	0	0	0	0	0	0	0	0	k__Bacteria; p__Firmicutes; c__Clostridia; o__Clostridiales; f__Lachnospiraceae; g__Acetatifactor; s__uncultured bacterium
OTU_823	0	0	0	0	0	0	0	0	0	0	0	0	0	k__Bacteria; p__Cyanobacteria; c__Oxyphotobacteria; o__Chloroplast
OTU_1990	2	0	2	1	0	1	0	0	0	0	0	0	0	k__Bacteria; p__Bacteroidetes; c__Bacteroidia; o__Bacteroidales
OTU_1378	0	0	0	0	0	0	0	0	0	0	0	0	0	k__Bacteria; p__Firmicutes; c__Clostridia; o__Clostridiales; f__Lachnospiraceae; g__Lachnospiraceae NK4A136 group; s__uncultured bacterium
OTU_1372	0	0	0	0	0	0	0	0	0	0	0	0	0	k__Bacteria; p__Firmicutes; c__Clostridia; o__Clostridiales; f__Lachnospiraceae; g__Lachnospiraceae NK4A136 group; s__uncultured bacterium
OTU_1200	0	5	0	0	0	0	1	0	0	0	0	0	1	k__Bacteria; p__Firmicutes; c__Clostridia; o__Clostridiales; f__Lachnospiraceae
OTU_1000	0	0	0	0	0	0	0	0	0	0	0	0	0	k__Bacteria; p__Firmicutes; c__Clostridia; o__Clostridiales; f__Lachnospiraceae; g__uncultured; s__uncultured organism
OTU_1024	0	0	0	0	0	0	0	0	0	0	0	0	0	k__Bacteria; p__Proteobacteria; c__Deltaproteobacteria; o__Desulfuromonadales; f__Desulfuromonadaceae; g__Desulfuromonas
OTU_455	0	4	0	0	0	2	0	2	0	0	0	0	1	k__Bacteria; p__Firmicutes; c__Clostridia; o__Clostridiales; f__Lachnospiraceae
OTU_272	0	3	0	0	0	4	0	0	0	0	0	0	0	k__Bacteria; p__Firmicutes; c__Clostridia; o__Clostridiales; f__Lachnospiraceae; g__Acetatifactor; s__uncultured bacterium
OTU_966	0	0	0	0	0	0	0	0	0	0	0	0	0	k__Bacteria; p__Actinobacteria; c__Actinobacteria; o__Actinomycetales; f__Actinomycetaceae; g__Actinomyces; s__uncultured bacterium
OTU_1323	1	0	0	0	0	0	0	0	0	0	0	0	0	k__Bacteria; p__Bacteroidetes; c__Bacteroidia; o__Bacteroidales; f__Muribaculaceae; g__uncultured bacterium; s__uncultured bacterium
OTU_998	0	0	0	0	0	0	0	0	0	0	0	0	0	k__Bacteria; p__Firmicutes; c__Clostridia; o__Clostridiales; f__Ruminococcaceae; g__DTU089; s__uncultured bacterium
OTU_1711	0	0	0	0	0	0	0	0	0	0	0	0	0	k__Bacteria; p__Bacteroidetes; c__Bacteroidia; o__Bacteroidales
OTU_1936	0	0	0	0	0	0	0	0	0	0	0	0	0	k__Bacteria; p__Firmicutes; c__Clostridia; o__Clostridiales; f__Lachnospiraceae
OTU_1339	0	0	0	0	0	0	0	0	0	0	0	0	0	k__Bacteria; p__Proteobacteria; c__Gammaproteobacteria; o__Betaproteobacteriales; f__SC-I-84; g__uncultured bacterium; s__uncultured bacterium
OTU_335	0	0	0	0	1	0	14	10	1	0	3	0	0	k__Bacteria; p__Bacteroidetes; c__Bacteroidia; o__Bacteroidales; f__Muribaculaceae; g__uncultured bacterium; s__uncultured bacterium
OTU_464	0	3	0	1	0	0	0	0	0	3	2	0	0	k__Bacteria; p__Firmicutes; c__Clostridia; o__Clostridiales; f__Lachnospiraceae; g__uncultured; s__uncultured bacterium
OTU_3029	0	0	1	0	0	2	1	0	0	0	0	0	0	k__Bacteria; p__Firmicutes; c__Clostridia; o__Clostridiales; f__Lachnospiraceae
OTU_1192	4	0	0	0	0	0	0	0	0	0	0	0	0	k__Bacteria; p__Firmicutes; c__Bacilli; o__Lactobacillales; f__Streptococcaceae; g__Lactococcus
OTU_531	0	0	0	0	0	0	17	0	1	0	0	0	0	k__Bacteria; p__Tenericutes; c__Mollicutes; o__Mollicutes RF39
OTU_2049	0	0	0	0	0	0	0	0	0	0	0	0	1	k__Bacteria; p__Firmicutes; c__Clostridia; o__Clostridiales; f__Lachnospiraceae
OTU_2135	0	0	0	0	0	0	0	0	0	0	0	0	0	k__Bacteria; p__Firmicutes; c__Clostridia; o__Clostridiales; f__Lachnospiraceae
OTU_658	0	0	0	0	0	0	9	1	0	0	0	0	0	k__Bacteria; p__Firmicutes; c__Erysipelotrichia; o__Erysipelotrichales; f__Erysipelotrichaceae; g__Allobaculum; s__uncultured bacterium
OTU_1850	0	0	0	0	0	0	0	0	0	0	0	0	0	k__Bacteria; p__Bacteroidetes; c__Bacteroidia; o__Bacteroidales; f__Muribaculaceae
OTU_549	3	1	0	0	1	5	1	1	1	0	2	0	1	k__Bacteria; p__Actinobacteria; c__Actinobacteria; o__Corynebacteriales; f__Corynebacteriaceae; g__Corynebacterium
OTU_1856	0	0	0	0	0	0	0	0	0	0	0	0	0	k__Bacteria; p__Firmicutes; c__Clostridia; o__Clostridiales; f__Ruminococcaceae; g__Butyricicoccus; s__uncultured bacterium
OTU_3018	0	0	0	0	0	0	0	0	0	0	0	0	0	k__Bacteria; p__Bacteroidetes; c__Bacteroidia; o__Bacteroidales; f__Prevotellaceae; g__Prevotellaceae UCG-001; s__uncultured Bacteroidales bacterium
OTU_3035	0	0	0	0	0	0	0	0	0	0	0	0	0	k__Bacteria; p__Firmicutes; c__Bacilli; o__Bacillales; f__Paenibacillaceae; g__Paenibacillus
OTU_3012	0	0	0	0	0	0	0	0	0	0	0	0	0	k__Bacteria; p__Epsilonbacteraeota; c__Campylobacteria; o__Campylobacterales; f__Campylobacteraceae; g__Campylobacter; s__unidentified
OTU_945	0	0	0	0	0	0	0	0	0	0	0	0	0	k__Bacteria; p__Firmicutes; c__Clostridia; o__Clostridiales; f__Lachnospiraceae; g__Blautia
OTU_1682	0	0	0	0	0	0	0	0	0	0	0	0	0	k__Bacteria; p__Firmicutes; c__Negativicutes; o__Selenomonadales; f__Veillonellaceae; g__Megamonas; s__Megamonas funiformis YIT 11815
OTU_2152	0	0	1	0	3	0	0	0	0	0	0	0	0	k__Bacteria; p__Bacteroidetes; c__Bacteroidia; o__Bacteroidales; f__Muribaculaceae
OTU_1355	11	0	0	0	0	0	0	0	0	0	0	0	0	k__Bacteria; p__Bacteroidetes; c__Bacteroidia; o__Bacteroidales; f__Muribaculaceae; g__uncultured bacterium; s__uncultured bacterium
OTU_2069	0	2	0	0	0	2	0	0	2	0	0	2	0	k__Bacteria; p__Firmicutes; c__Clostridia; o__Clostridiales; f__Lachnospiraceae; g__Acetatifactor; s__uncultured bacterium
OTU_2571	0	0	0	11	0	1	1	0	0	0	0	0	0	k__Bacteria; p__Firmicutes; c__Clostridia; o__Clostridiales; f__Lachnospiraceae
OTU_338	0	0	0	0	0	0	0	1	0	1	0	0	0	k__Bacteria; p__Firmicutes; c__Clostridia; o__Clostridiales; f__Lachnospiraceae; g__Tyzzerella 3; s__uncultured bacterium
OTU_2565	0	0	1	2	3	1	0	1	1	5	3	12	11	k__Bacteria; p__Bacteroidetes; c__Bacteroidia; o__Bacteroidales; f__Muribaculaceae
OTU_894	0	0	0	0	0	0	0	0	1	0	0	0	1	k__Bacteria; p__Firmicutes; c__Bacilli; o__Lactobacillales; f__Aerococcaceae; g__Eremococcus; s__uncultured Facklamia sp.
OTU_1341	0	1	0	0	0	1	0	0	1	0	1	0	0	k__Bacteria; p__Firmicutes; c__Clostridia; o__Clostridiales; f__Lachnospiraceae; g__GCA-900066575; s__uncultured bacterium
OTU_2234	0	16	2	2	2	7	0	0	0	2	0	0	0	k__Bacteria; p__Firmicutes; c__Clostridia; o__Clostridiales; f__Lachnospiraceae
OTU_1261	0	0	0	0	0	0	0	0	9	0	0	0	4	k__Bacteria; p__Bacteroidetes; c__Bacteroidia; o__Bacteroidales
OTU_1356	0	0	0	0	0	0	0	0	0	0	0	0	0	k__Bacteria; p__Proteobacteria; c__Gammaproteobacteria; o__Betaproteobacteriales; f__Burkholderiaceae; g__Comamonas
OTU_439	0	1	0	0	0	0	4	4	0	0	0	0	0	k__Bacteria; p__Bacteroidetes; c__Bacteroidia; o__Bacteroidales; f__Muribaculaceae
OTU_231	0	1	1	0	0	1	2	42	0	0	0	0	0	k__Bacteria; p__Firmicutes; c__Clostridia; o__Clostridiales; f__Ruminococcaceae; g__Ruminococcaceae UCG-014
OTU_1031	0	0	2	0	0	0	0	0	0	0	0	0	0	k__Bacteria; p__Firmicutes; c__Clostridia; o__Clostridiales; f__Clostridiales vadinBB60 group; g__uncultured bacterium; s__uncultured bacterium
OTU_376	1	0	0	0	0	0	7	5	0	0	1	0	0	k__Bacteria; p__Firmicutes; c__Clostridia; o__Clostridiales; f__Lachnospiraceae; g__Lachnospiraceae UCG-001; s__uncultured bacterium
OTU_2139	0	1	3	0	0	0	0	0	0	4	4	15	124	k__Bacteria; p__Bacteroidetes; c__Bacteroidia; o__Bacteroidales
OTU_1158	0	0	0	0	0	0	0	0	0	0	0	0	0	k__Bacteria; p__Firmicutes; c__Clostridia; o__Clostridiales; f__Ruminococcaceae; g__Ruminococcaceae UCG-014
OTU_2155	0	0	0	0	0	0	0	0	0	0	0	0	0	k__Bacteria; p__Bacteroidetes; c__Bacteroidia; o__Bacteroidales; f__Muribaculaceae; g__uncultured bacterium; s__uncultured bacterium
OTU_1390	0	0	1	0	0	0	0	0	0	0	0	1	0	k__Bacteria; p__Bacteroidetes; c__Bacteroidia; o__Bacteroidales; f__Muribaculaceae; g__uncultured bacterium; s__uncultured bacterium
OTU_2990	4	0	0	0	1	0	0	0	0	4	2	1	0	k__Bacteria; p__Bacteroidetes; c__Bacteroidia; o__Bacteroidales
OTU_1837	8	3	3	0	0	4	0	0	0	1	0	0	0	k__Bacteria; p__Bacteroidetes; c__Bacteroidia; o__Bacteroidales
OTU_1435	0	12	1	0	0	0	0	0	0	0	0	0	0	k__Bacteria; p__Bacteroidetes; c__Bacteroidia; o__Bacteroidales; f__Muribaculaceae; g__uncultured bacterium; s__uncultured bacterium
OTU_2520	4	0	1	1	0	3	0	0	1	2	0	7	0	k__Bacteria; p__Bacteroidetes; c__Bacteroidia; o__Bacteroidales
OTU_2619	18	0	2	5	0	12	0	0	0	4	1	0	16	k__Bacteria; p__Bacteroidetes; c__Bacteroidia; o__Bacteroidales; f__Muribaculaceae
OTU_1665	0	0	2	0	0	0	0	0	2	5	5	26	38	k__Bacteria; p__Bacteroidetes; c__Bacteroidia; o__Bacteroidales; f__Muribaculaceae; g__uncultured bacterium; s__uncultured bacterium
OTU_1327	15	2	6	17	1	8	0	0	0	2	0	0	10	k__Bacteria; p__Bacteroidetes; c__Bacteroidia; o__Bacteroidales
OTU_2647	11	0	5	1	2	8	0	0	2	1	1	0	3	k__Bacteria; p__Bacteroidetes; c__Bacteroidia; o__Bacteroidales; f__Muribaculaceae; g__uncultured bacterium; s__uncultured bacterium
OTU_614	0	0	0	0	0	0	0	0	0	0	0	0	2	k__Bacteria; p__Firmicutes; c__Clostridia; o__Clostridiales; f__Lachnospiraceae; g__Lachnospiraceae NK4A136 group; s__uncultured bacterium
OTU_2233	0	99	0	0	0	5	3	2	0	1	2	0	0	k__Bacteria; p__Firmicutes; c__Clostridia; o__Clostridiales; f__Ruminococcaceae
OTU_1595	0	0	0	0	0	0	0	0	0	0	0	0	0	k__Bacteria; p__Bacteroidetes; c__Bacteroidia; o__Bacteroidales; f__Muribaculaceae; g__uncultured bacterium; s__uncultured bacterium
OTU_1560	0	0	0	0	0	0	0	0	0	1	0	0	0	k__Bacteria; p__Bacteroidetes; c__Bacteroidia; o__Bacteroidales; f__Muribaculaceae; g__uncultured bacterium; s__uncultured bacterium
OTU_422	0	5	0	7	8	1	0	2	0	1	0	7	0	k__Bacteria; p__Fusobacteria; c__Fusobacteriia; o__Fusobacteriales; f__Fusobacteriaceae; g__Fusobacterium; s__uncultured organism
OTU_840	0	0	0	0	0	2	0	0	0	0	0	0	4	k__Bacteria; p__Firmicutes; c__Clostridia; o__Clostridiales; f__Ruminococcaceae; g__uncultured
OTU_1925	0	0	0	0	0	0	0	0	0	0	0	1	4	k__Bacteria; p__Bacteroidetes; c__Bacteroidia; o__Bacteroidales
OTU_1026	27	31	14	0	9	4	0	0	1	0	1	0	0	k__Bacteria; p__Bacteroidetes; c__Bacteroidia; o__Bacteroidales; f__Muribaculaceae; g__uncultured bacterium; s__uncultured bacterium
OTU_723	0	0	0	0	0	2	0	1	2	0	0	0	0	k__Bacteria; p__Firmicutes; c__Clostridia; o__Clostridiales; f__Clostridiales vadinBB60 group; g__uncultured bacterium; s__uncultured bacterium
OTU_1537	2	0	0	0	0	0	0	0	0	0	0	0	1	k__Bacteria; p__Bacteroidetes; c__Bacteroidia; o__Bacteroidales; f__Muribaculaceae; g__Muribaculum; s__Parabacteroides sp. YL27
OTU_1293	0	0	0	0	0	0	0	0	3	1	14	44	108	k__Bacteria; p__Bacteroidetes; c__Bacteroidia; o__Bacteroidales; f__Muribaculaceae; g__uncultured bacterium; s__uncultured bacterium
OTU_1418	0	0	1	0	0	0	0	0	0	1	0	0	0	k__Bacteria; p__Bacteroidetes; c__Bacteroidia; o__Bacteroidales; f__Muribaculaceae; g__uncultured bacterium; s__uncultured bacterium
OTU_1488	0	13	1	0	0	0	0	0	0	2	0	0	5	k__Bacteria
OTU_2862	0	0	0	0	1	0	0	0	0	1	0	0	0	k__Bacteria; p__Bacteroidetes; c__Bacteroidia; o__Bacteroidales
OTU_1217	0	0	0	0	0	0	0	0	0	0	0	0	0	k__Bacteria; p__Firmicutes; c__Clostridia; o__Clostridiales; f__Lachnospiraceae
OTU_922	0	0	0	0	0	0	0	0	1	0	0	1	0	k__Bacteria; p__Firmicutes; c__Clostridia; o__Clostridiales; f__Ruminococcaceae
OTU_2574	0	0	0	0	0	0	0	0	0	1	0	0	3	k__Bacteria; p__Bacteroidetes; c__Bacteroidia; o__Bacteroidales; f__Muribaculaceae; g__uncultured bacterium; s__uncultured bacterium
OTU_729	0	1	0	0	0	0	0	0	0	0	0	0	0	k__Bacteria; p__Firmicutes; c__Clostridia; o__Clostridiales; f__Lachnospiraceae; g__Roseburia; s__uncultured bacterium
OTU_1225	0	15	1	0	0	0	0	0	0	1	1	1	8	k__Bacteria; p__Bacteroidetes; c__Bacteroidia; o__Bacteroidales; f__Muribaculaceae; g__uncultured bacterium; s__uncultured bacterium
OTU_2281	0	0	1	0	0	0	0	0	0	1	0	1	1	k__Bacteria; p__Bacteroidetes; c__Bacteroidia; o__Bacteroidales; f__Muribaculaceae; g__uncultured bacterium; s__uncultured bacterium
OTU_1658	0	0	0	0	0	0	0	0	0	0	0	0	0	k__Bacteria; p__Bacteroidetes; c__Bacteroidia; o__Bacteroidales; f__Bacteroidaceae; g__Bacteroides
OTU_1651	0	0	0	0	0	0	0	0	0	0	0	0	0	k__Bacteria; p__Firmicutes; c__Clostridia; o__Clostridiales; f__Lachnospiraceae
OTU_2324	0	2	1	0	0	1	6	0	2	2	0	0	0	k__Bacteria; p__Firmicutes; c__Clostridia; o__Clostridiales; f__Ruminococcaceae; g__Ruminiclostridium 5; s__uncultured bacterium
OTU_1114	3	0	0	0	0	0	0	0	0	0	0	0	0	k__Bacteria; p__Firmicutes; c__Bacilli; o__Bacillales; f__Planococcaceae; g__Lysinibacillus; s__Lysinibacillus sphaericus
OTU_2127	1	0	4	0	1	0	0	0	1	7	2	2	6	k__Bacteria; p__Bacteroidetes; c__Bacteroidia; o__Bacteroidales; f__Muribaculaceae; g__uncultured bacterium; s__uncultured bacterium
OTU_2586	0	1	0	0	0	0	0	0	0	0	0	0	0	k__Bacteria
OTU_2072	0	1	0	0	0	0	0	0	0	0	0	0	0	k__Bacteria; p__Bacteroidetes; c__Bacteroidia; o__Bacteroidales; f__Muribaculaceae; g__uncultured bacterium; s__uncultured bacterium
OTU_2204	2	0	0	0	0	2	0	0	0	0	0	2	0	k__Bacteria; p__Bacteroidetes; c__Bacteroidia; o__Bacteroidales; f__Bacteroidaceae; g__Bacteroides; s__Bacteroides acidifaciens
OTU_2342	0	1	0	0	0	0	0	0	0	0	0	2	14	k__Bacteria; p__Bacteroidetes; c__Bacteroidia; o__Bacteroidales; f__Muribaculaceae; g__uncultured bacterium; s__uncultured bacterium
OTU_1689	0	0	0	0	0	0	0	0	0	0	0	2	0	k__Bacteria; p__Bacteroidetes; c__Bacteroidia; o__Bacteroidales; f__Muribaculaceae; g__uncultured bacterium; s__uncultured bacterium
OTU_2325	0	0	1	0	0	0	0	0	0	0	0	0	0	k__Bacteria; p__Bacteroidetes; c__Bacteroidia; o__Bacteroidales; f__Muribaculaceae; g__uncultured bacterium; s__uncultured bacterium
OTU_1917	0	0	0	0	0	0	0	0	0	0	0	0	0	k__Bacteria
OTU_1571	1	1	8	0	8	0	0	0	0	0	0	0	0	k__Bacteria; p__Bacteroidetes; c__Bacteroidia; o__Bacteroidales; f__Muribaculaceae; g__uncultured bacterium; s__uncultured bacterium
OTU_1021	0	0	0	0	0	0	1	0	0	0	0	0	0	k__Bacteria; p__Proteobacteria; c__Alphaproteobacteria; o__Rhodospirillales; f__uncultured
OTU_3003	0	0	0	0	0	0	0	0	0	0	0	0	0	k__Bacteria
OTU_1441	0	0	1	0	2	0	0	0	0	0	0	7	0	k__Bacteria; p__Bacteroidetes; c__Bacteroidia; o__Bacteroidales; f__Rikenellaceae; g__Alistipes; s__Alistipes sp. CHKCI003
OTU_1320	0	0	0	0	0	0	0	0	0	0	0	0	0	k__Bacteria; p__Firmicutes; c__Clostridia; o__Clostridiales; f__Lachnospiraceae; g__Lachnospiraceae NK4A136 group
OTU_613	0	0	0	0	0	0	3	7	3	0	0	0	0	k__Bacteria; p__Firmicutes; c__Bacilli; o__Lactobacillales; f__Aerococcaceae; g__Aerococcus; s__uncultured bacterium
OTU_1107	0	0	0	0	0	0	0	0	0	0	0	0	0	k__Bacteria; p__Bacteroidetes; c__Bacteroidia; o__Bacteroidales; f__Muribaculaceae
OTU_2688	4	0	1	1	0	0	0	0	1	2	0	19	58	k__Bacteria; p__Bacteroidetes; c__Bacteroidia; o__Bacteroidales; f__Prevotellaceae
OTU_2508	0	0	0	0	0	0	0	0	1	1	0	0	0	k__Bacteria; p__Bacteroidetes; c__Bacteroidia; o__Bacteroidales; f__Muribaculaceae; g__uncultured bacterium; s__uncultured bacterium
OTU_1610	0	0	0	0	1	0	0	0	0	0	0	1	0	k__Bacteria; p__Bacteroidetes; c__Bacteroidia; o__Bacteroidales; f__Rikenellaceae; g__Alistipes
OTU_845	0	0	1	1	3	0	0	1	0	0	0	0	0	k__Bacteria; p__Firmicutes; c__Clostridia; o__Clostridiales; f__Family XI; g__Anaerococcus; s__uncultured bacterium
OTU_260	0	0	1	0	0	0	0	0	2	0	0	0	0	k__Bacteria; p__Bacteroidetes; c__Bacteroidia; o__Bacteroidales; f__Muribaculaceae; g__uncultured bacterium; s__uncultured bacterium
OTU_1871	4	1	2	1	5	2	0	0	1	1	0	10	7	k__Bacteria; p__Bacteroidetes; c__Bacteroidia; o__Bacteroidales
OTU_2422	0	1	2	0	1	0	0	0	0	0	0	0	0	k__Bacteria; p__Bacteroidetes; c__Bacteroidia; o__Bacteroidales; f__Muribaculaceae; g__uncultured bacterium; s__uncultured bacterium
OTU_2090	0	0	0	0	0	1	0	0	0	0	0	0	0	k__Bacteria; p__Bacteroidetes; c__Bacteroidia; o__Bacteroidales; f__Bacteroidaceae; g__Bacteroides
OTU_989	0	0	0	0	0	0	0	0	0	0	0	0	0	k__Bacteria; p__Firmicutes; c__Clostridia; o__Clostridiales; f__Lachnospiraceae
OTU_2116	0	2	0	0	0	0	0	0	0	0	31	4	23	k__Bacteria; p__Bacteroidetes; c__Bacteroidia; o__Bacteroidales; f__Muribaculaceae; g__uncultured bacterium; s__uncultured bacterium
OTU_639	1	0	1	0	0	0	0	3	0	0	0	0	0	k__Bacteria; p__Firmicutes; c__Clostridia; o__Clostridiales; f__Ruminococcaceae; g__Ruminococcaceae UCG-014
OTU_850	0	0	0	0	0	0	0	1	0	0	0	0	0	k__Bacteria; p__Firmicutes; c__Clostridia; o__Clostridiales; f__Family XI; g__Anaerococcus; s__uncultured bacterium
OTU_1830	0	0	0	0	0	0	0	0	0	0	0	0	0	k__Bacteria
OTU_1683	1	0	0	0	0	1	0	0	0	0	1	0	0	k__Bacteria; p__Bacteroidetes; c__Bacteroidia; o__Bacteroidales; f__Muribaculaceae; g__uncultured bacterium; s__uncultured bacterium
OTU_1270	1	0	0	0	0	0	0	0	0	0	0	0	0	k__Bacteria; p__Bacteroidetes; c__Bacteroidia; o__Bacteroidales
OTU_1076	0	0	0	0	0	8	0	0	0	0	0	0	0	k__Bacteria; p__Firmicutes; c__Clostridia; o__Clostridiales; f__Lachnospiraceae; g__uncultured; s__uncultured bacterium
OTU_1128	0	0	0	0	0	0	0	0	0	0	0	0	0	k__Bacteria; p__Actinobacteria; c__Coriobacteriia; o__Coriobacteriales; f__Coriobacteriaceae; g__Collinsella
OTU_976	2	0	0	1	0	0	0	0	0	0	0	0	0	k__Bacteria; p__Proteobacteria; c__Alphaproteobacteria; o__Rhizobiales; f__Rhizobiaceae; g__Ochrobactrum; s__uncultured bacterium
OTU_2882	0	0	0	0	0	0	0	0	0	0	0	0	0	k__Bacteria; p__Bacteroidetes; c__Bacteroidia; o__Bacteroidales; f__Muribaculaceae; g__uncultured bacterium; s__uncultured bacterium
OTU_2359	3	0	0	1	0	3	0	0	0	1	0	0	3	k__Bacteria; p__Bacteroidetes; c__Bacteroidia; o__Bacteroidales
OTU_344	0	2	0	0	0	8	0	0	0	0	0	0	0	k__Bacteria; p__Firmicutes; c__Clostridia; o__Clostridiales; f__Lachnospiraceae; g__Roseburia; s__uncultured bacterium
OTU_2132	0	0	0	0	0	0	0	0	0	0	1	10	7	k__Bacteria; p__Bacteroidetes; c__Bacteroidia; o__Bacteroidales; f__Muribaculaceae; g__uncultured bacterium; s__uncultured bacterium
OTU_2828	0	0	0	0	0	0	0	0	0	0	0	0	0	k__Bacteria; p__Bacteroidetes; c__Bacteroidia; o__Bacteroidales; f__Muribaculaceae; g__uncultured bacterium; s__uncultured bacterium
OTU_1685	0	0	0	0	0	0	0	0	0	0	0	0	0	k__Bacteria; p__Bacteroidetes; c__Bacteroidia; o__Bacteroidales; f__Muribaculaceae; g__uncultured bacterium; s__uncultured bacterium
OTU_1499	0	1	1	0	1	0	0	0	0	0	0	0	0	k__Bacteria; p__Bacteroidetes; c__Bacteroidia; o__Bacteroidales
OTU_472	2	2	1	0	2	2	0	1	0	0	0	0	1	k__Bacteria; p__Firmicutes; c__Clostridia; o__Clostridiales; f__Lachnospiraceae
OTU_1935	0	0	0	0	0	0	0	0	0	0	0	0	0	k__Bacteria
OTU_2078	17	0	1	0	0	0	0	0	8	0	0	0	0	k__Bacteria; p__Bacteroidetes; c__Bacteroidia; o__Bacteroidales; f__Muribaculaceae; g__uncultured bacterium; s__uncultured bacterium
OTU_906	2	2	0	0	0	0	2	0	0	0	0	0	0	k__Bacteria; p__Bacteroidetes; c__Bacteroidia; o__Bacteroidales; f__Muribaculaceae; g__uncultured bacterium; s__uncultured bacterium
OTU_1003	0	0	0	0	0	0	0	0	0	0	0	0	0	k__Bacteria; p__Bacteroidetes; c__Bacteroidia; o__Bacteroidales; f__Muribaculaceae; g__uncultured bacterium; s__uncultured bacterium
OTU_932	0	0	0	0	0	0	0	0	1	0	0	0	0	k__Bacteria; p__Tenericutes; c__Mollicutes; o__Mollicutes RF39; f__uncultured bacterium; g__uncultured bacterium; s__uncultured bacterium
OTU_1039	0	0	0	0	0	0	0	0	0	0	0	0	0	k__Bacteria; p__Firmicutes; c__Clostridia; o__Clostridiales; f__Ruminococcaceae; g__Hydrogenoanaerobacterium
OTU_1842	0	0	0	0	0	0	0	3	0	0	0	0	0	k__Bacteria; p__Firmicutes; c__Clostridia; o__Clostridiales; f__Lachnospiraceae
OTU_1543	0	1	0	0	0	0	0	0	0	0	0	3	6	k__Bacteria; p__Bacteroidetes; c__Bacteroidia; o__Bacteroidales; f__Muribaculaceae; g__uncultured bacterium; s__uncultured bacterium
OTU_2618	0	0	0	0	0	0	0	0	0	0	0	2	0	k__Bacteria; p__Bacteroidetes; c__Bacteroidia; o__Bacteroidales; f__Tannerellaceae; g__Parabacteroides
OTU_3013	0	0	0	0	0	0	0	0	0	0	0	0	0	k__Bacteria; p__Bacteroidetes; c__Bacteroidia; o__Bacteroidales
OTU_2410	0	0	0	0	0	0	0	0	0	0	0	0	0	k__Bacteria; p__Firmicutes; c__Clostridia; o__Clostridiales; f__Lachnospiraceae
OTU_1707	0	0	0	0	0	0	0	0	0	0	0	0	0	k__Bacteria; p__Bacteroidetes; c__Bacteroidia; o__Bacteroidales; f__Muribaculaceae; g__uncultured bacterium; s__uncultured bacterium
OTU_1463	2	0	0	0	0	0	0	0	0	0	0	0	0	k__Bacteria; p__Bacteroidetes; c__Bacteroidia; o__Bacteroidales; f__Muribaculaceae; g__Muribaculum; s__Parabacteroides sp. YL27
OTU_1952	0	0	0	0	0	0	0	0	0	0	0	0	0	k__Bacteria; p__Bacteroidetes; c__Bacteroidia; o__Bacteroidales; f__Muribaculaceae; g__uncultured bacterium; s__uncultured bacterium
OTU_703	0	0	1	0	0	5	0	0	0	0	0	0	0	k__Bacteria; p__Firmicutes; c__Clostridia; o__Clostridiales; f__Ruminococcaceae; g__Ruminiclostridium 9; s__uncultured bacterium
OTU_2101	8	0	2	1	0	2	0	0	0	0	0	0	0	k__Bacteria; p__Bacteroidetes; c__Bacteroidia; o__Bacteroidales; f__Muribaculaceae; g__uncultured bacterium; s__uncultured bacterium
OTU_101	0	0	0	0	0	0	237	3	0	0	0	0	0	k__Bacteria; p__Epsilonbacteraeota; c__Campylobacteria; o__Campylobacterales; f__Helicobacteraceae; g__Helicobacter
OTU_1312	0	0	0	0	0	0	0	0	0	0	0	3	1	k__Bacteria; p__Bacteroidetes; c__Bacteroidia; o__Bacteroidales
OTU_1797	1	0	0	0	2	0	0	0	0	0	2	1	0	k__Bacteria; p__Bacteroidetes; c__Bacteroidia; o__Bacteroidales
OTU_1083	66	0	46	0	35	0	0	4	14	13	28	42	7	k__Bacteria; p__Bacteroidetes; c__Bacteroidia; o__Bacteroidales; f__Muribaculaceae; g__uncultured bacterium; s__uncultured bacterium
OTU_3028	0	0	0	1	0	1	0	0	0	0	0	7	3	k__Bacteria; p__Bacteroidetes; c__Bacteroidia; o__Bacteroidales; f__Muribaculaceae
OTU_2186	0	0	0	0	0	0	0	0	0	0	0	0	1	k__Bacteria; p__Firmicutes; c__Clostridia; o__Clostridiales
OTU_497	0	0	0	0	0	0	0	0	0	0	0	0	0	k__Bacteria; p__Firmicutes; c__Bacilli; o__Lactobacillales; f__Lactobacillaceae; g__Lactobacillus; s__Lactobacillus salivarius
OTU_2105	3	0	3	0	2	0	0	0	2	0	0	0	1	k__Bacteria; p__Bacteroidetes; c__Bacteroidia; o__Bacteroidales; f__Muribaculaceae; g__uncultured bacterium; s__uncultured bacterium
OTU_2651	0	0	0	0	1	0	0	0	0	0	0	0	0	k__Bacteria; p__Firmicutes; c__Erysipelotrichia; o__Erysipelotrichales; f__Erysipelotrichaceae
OTU_1981	9	0	16	0	3	0	0	0	0	3	9	23	5	k__Bacteria; p__Bacteroidetes; c__Bacteroidia; o__Bacteroidales
OTU_2749	2	0	0	0	0	0	0	0	0	0	0	0	0	k__Bacteria; p__Bacteroidetes; c__Bacteroidia; o__Bacteroidales; f__Bacteroidaceae; g__Bacteroides; s__Bacteroides acidifaciens
OTU_2500	1	0	1	0	0	0	0	0	0	1	0	0	6	k__Bacteria; p__Bacteroidetes; c__Bacteroidia; o__Bacteroidales; f__Muribaculaceae; g__uncultured bacterium; s__uncultured bacterium
OTU_2899	0	0	1	0	0	0	0	0	11	0	0	0	0	k__Bacteria; p__Firmicutes; c__Clostridia; o__Clostridiales; f__Lachnospiraceae
OTU_1080	0	0	0	0	0	0	0	0	0	0	0	0	0	k__Bacteria; p__Firmicutes; c__Clostridia; o__Clostridiales; f__Clostridiaceae 1; g__Clostridium sensu stricto 13; s__rumen bacterium NC-30
OTU_1273	0	0	0	0	0	0	0	0	0	0	0	0	0	k__Bacteria; p__Firmicutes; c__Clostridia; o__Clostridiales; f__Lachnospiraceae
OTU_1636	0	0	0	0	0	0	0	0	0	0	0	0	0	k__Bacteria; p__Bacteroidetes; c__Bacteroidia; o__Bacteroidales; f__Muribaculaceae; g__uncultured bacterium; s__uncultured bacterium
OTU_2300	1	0	2	0	0	0	0	0	0	0	0	0	0	k__Bacteria; p__Bacteroidetes; c__Bacteroidia; o__Bacteroidales; f__Muribaculaceae; g__uncultured bacterium; s__uncultured bacterium
OTU_2214	0	0	0	0	0	0	0	0	0	0	0	0	1	k__Bacteria; p__Bacteroidetes; c__Bacteroidia; o__Bacteroidales; f__Muribaculaceae; g__uncultured bacterium; s__uncultured bacterium
OTU_1313	0	4	0	0	0	11	0	0	0	2	0	1	2	k__Bacteria; p__Firmicutes; c__Clostridia; o__Clostridiales; f__Ruminococcaceae; g__Oscillibacter; s__uncultured bacterium
OTU_2673	0	0	0	0	0	0	0	0	0	0	0	0	0	k__Bacteria
OTU_1219	3	0	2	0	5	0	0	0	0	1	7	1	0	k__Bacteria; p__Bacteroidetes; c__Bacteroidia; o__Bacteroidales; f__Muribaculaceae; g__uncultured bacterium; s__uncultured bacterium
OTU_2229	0	0	0	0	0	0	0	0	0	0	0	0	0	k__Bacteria; p__Bacteroidetes; c__Bacteroidia; o__Bacteroidales; f__Muribaculaceae
OTU_1927	2	0	0	0	0	0	0	0	0	0	0	0	0	k__Bacteria; p__Bacteroidetes; c__Bacteroidia; o__Bacteroidales; f__Muribaculaceae; g__uncultured bacterium; s__uncultured bacterium
OTU_1149	0	0	0	0	0	0	0	0	0	0	0	0	0	k__Bacteria; p__Firmicutes; c__Clostridia; o__Clostridiales; f__Family XI; g__Murdochiella; s__Levyella massiliensis
OTU_847	0	0	1	0	0	5	0	0	0	1	1	3	2	k__Bacteria; p__Firmicutes; c__Clostridia; o__Clostridiales; f__Ruminococcaceae
OTU_939	0	0	1	0	0	7	0	0	0	0	0	0	0	k__Bacteria; p__Firmicutes; c__Clostridia; o__Clostridiales; f__Lachnospiraceae
OTU_1168	0	0	0	0	0	0	0	0	0	0	0	0	0	k__Bacteria; p__Proteobacteria; c__Alphaproteobacteria; o__Acetobacterales; f__Acetobacteraceae
OTU_1260	0	0	0	0	0	0	0	0	0	0	0	1	0	k__Bacteria; p__Bacteroidetes; c__Bacteroidia; o__Bacteroidales; f__Rikenellaceae; g__Alistipes
OTU_1519	0	0	0	0	1	0	0	0	0	0	2	3	9	k__Bacteria; p__Bacteroidetes; c__Bacteroidia; o__Bacteroidales; f__Muribaculaceae; g__uncultured bacterium; s__uncultured bacterium
OTU_1840	0	0	1	0	1	0	0	0	0	0	0	4	0	k__Bacteria; p__Bacteroidetes; c__Bacteroidia; o__Bacteroidales; f__Muribaculaceae; g__uncultured bacterium; s__uncultured bacterium
OTU_2055	0	0	0	0	0	0	0	0	0	0	0	2	0	k__Bacteria; p__Bacteroidetes; c__Bacteroidia; o__Bacteroidales; f__Muribaculaceae; g__uncultured bacterium; s__uncultured bacterium
OTU_2799	0	4	1	2	0	0	0	0	0	3	3	7	4	k__Bacteria; p__Bacteroidetes; c__Bacteroidia; o__Bacteroidales
OTU_1882	0	0	0	0	0	0	0	0	0	0	0	0	0	k__Bacteria
OTU_2986	0	0	0	0	0	0	0	0	0	0	0	0	0	k__Bacteria; p__Bacteroidetes; c__Bacteroidia; o__Bacteroidales; f__Muribaculaceae; g__uncultured bacterium; s__uncultured bacterium
OTU_2058	1	0	2	0	0	0	0	0	0	0	0	1	1	k__Bacteria; p__Bacteroidetes; c__Bacteroidia; o__Bacteroidales; f__Muribaculaceae; g__uncultured bacterium; s__uncultured bacterium
OTU_2719	0	0	1	0	0	0	0	0	0	0	0	0	0	k__Bacteria; p__Actinobacteria; c__Actinobacteria; o__Corynebacteriales; f__Corynebacteriaceae
OTU_2630	0	0	3	0	0	0	0	0	0	0	0	5	0	k__Bacteria; p__Bacteroidetes; c__Bacteroidia; o__Bacteroidales; f__Muribaculaceae
OTU_2593	0	0	0	0	0	0	0	0	0	0	0	0	0	k__Bacteria; p__Bacteroidetes; c__Bacteroidia; o__Bacteroidales; f__Muribaculaceae; g__uncultured bacterium; s__uncultured bacterium
OTU_2373	1	0	1	0	0	0	0	0	1	0	1	5	6	k__Bacteria; p__Bacteroidetes; c__Bacteroidia; o__Bacteroidales; f__Muribaculaceae
OTU_1986	0	0	1	0	0	0	0	0	0	0	1	0	6	k__Bacteria
OTU_1184	0	0	2	6	0	0	0	0	0	6	0	29	59	k__Bacteria; p__Bacteroidetes; c__Bacteroidia; o__Bacteroidales
OTU_1062	0	0	0	0	0	0	0	0	0	0	0	0	0	k__Bacteria; p__Tenericutes; c__Mollicutes; o__Mollicutes RF39
OTU_1547	0	0	0	0	0	0	0	0	0	0	0	0	0	k__Bacteria; p__Bacteroidetes; c__Bacteroidia; o__Bacteroidales; f__Muribaculaceae; g__uncultured bacterium; s__uncultured bacterium
OTU_1377	0	0	2	0	0	0	0	0	0	0	0	0	0	k__Bacteria
OTU_959	0	0	0	0	0	0	0	0	0	0	0	0	0	k__Bacteria; p__Tenericutes; c__Mollicutes; o__Mollicutes RF39
OTU_3033	1	0	0	0	0	0	0	0	0	0	0	0	0	k__Bacteria; p__Bacteroidetes; c__Bacteroidia; o__Bacteroidales; f__Muribaculaceae
OTU_1669	1	3	0	0	0	0	0	0	0	0	0	0	0	k__Bacteria; p__Bacteroidetes; c__Bacteroidia; o__Bacteroidales
OTU_915	0	0	0	0	0	0	0	2	0	0	0	0	0	k__Bacteria; p__Actinobacteria; c__Actinobacteria; o__Bifidobacteriales; f__Bifidobacteriaceae; g__Gardnerella; s__Gardnerella vaginalis 00703Bmash
OTU_2389	0	0	0	0	0	0	0	0	0	0	0	0	0	k__Bacteria; p__Bacteroidetes; c__Bacteroidia; o__Bacteroidales; f__Rikenellaceae; g__Alistipes
OTU_2124	0	0	0	0	0	0	0	0	0	0	0	0	0	k__Bacteria; p__Bacteroidetes; c__Bacteroidia; o__Bacteroidales; f__Muribaculaceae; g__uncultured bacterium; s__uncultured bacterium
OTU_1329	0	0	1	0	0	0	0	0	0	0	0	0	0	k__Bacteria; p__Bacteroidetes; c__Bacteroidia; o__Bacteroidales; f__Muribaculaceae; g__uncultured bacterium; s__uncultured bacterium
OTU_1838	0	0	0	0	0	0	0	0	0	0	0	1	1	k__Bacteria; p__Bacteroidetes; c__Bacteroidia; o__Bacteroidales
OTU_471	0	0	0	0	0	0	0	0	0	4	0	2	0	k__Bacteria; p__Actinobacteria; c__Actinobacteria; o__Actinomycetales; f__Actinomycetaceae; g__Varibaculum; s__uncultured bacterium
OTU_1970	0	0	0	0	0	0	0	0	0	0	0	0	0	k__Bacteria
OTU_2822	0	0	0	0	0	1	0	0	0	0	0	0	0	k__Bacteria; p__Firmicutes; c__Clostridia; o__Clostridiales; f__Lachnospiraceae
OTU_1484	0	0	1	0	0	0	0	0	0	1	0	0	0	k__Bacteria; p__Bacteroidetes; c__Bacteroidia; o__Bacteroidales
OTU_1315	5	0	15	0	19	0	0	0	1	7	12	35	1	k__Bacteria; p__Bacteroidetes; c__Bacteroidia; o__Bacteroidales; f__Muribaculaceae; g__uncultured bacterium; s__uncultured bacterium
OTU_1591	0	0	0	0	0	0	0	0	0	0	0	0	0	k__Bacteria; p__Firmicutes; c__Clostridia; o__Clostridiales; f__Ruminococcaceae
OTU_1652	0	0	0	0	0	2	0	0	0	0	0	0	4	k__Bacteria; p__Firmicutes; c__Clostridia; o__Clostridiales; f__Ruminococcaceae; g__uncultured
OTU_598	0	0	18	0	4	3	0	0	0	1	1	0	0	k__Bacteria; p__Firmicutes; c__Clostridia; o__Clostridiales
OTU_2432	0	0	0	0	0	0	0	0	0	0	0	0	0	k__Bacteria
OTU_2959	0	0	0	0	0	0	0	0	0	0	0	0	0	k__Bacteria; p__Bacteroidetes; c__Bacteroidia; o__Bacteroidales
OTU_1773	0	0	0	0	0	0	0	0	0	0	0	1	0	k__Bacteria; p__Bacteroidetes; c__Bacteroidia; o__Bacteroidales; f__Muribaculaceae; g__uncultured bacterium; s__uncultured bacterium
OTU_2137	0	0	0	0	0	0	0	0	0	0	0	0	2	k__Bacteria; p__Bacteroidetes; c__Bacteroidia; o__Bacteroidales; f__Muribaculaceae; g__uncultured bacterium; s__uncultured bacterium
OTU_2697	0	0	0	0	0	0	0	0	0	0	0	0	0	k__Bacteria
OTU_2559	0	0	0	0	0	0	0	0	0	0	0	0	0	k__Bacteria; p__Proteobacteria; c__Gammaproteobacteria; o__Pseudomonadales; f__Moraxellaceae; g__Psychrobacter; s__uncultured Psychrobacter sp.
OTU_2844	0	0	0	0	0	0	0	0	0	0	0	0	0	k__Bacteria; p__Bacteroidetes; c__Bacteroidia; o__Bacteroidales; f__Muribaculaceae
OTU_1823	0	15	9	0	3	0	0	0	4	7	224	111	143	k__Bacteria; p__Bacteroidetes; c__Bacteroidia; o__Bacteroidales; f__Muribaculaceae; g__uncultured bacterium; s__uncultured bacterium
OTU_3030	0	0	0	0	0	0	0	0	1	0	0	0	0	k__Bacteria; p__Bacteroidetes; c__Bacteroidia; o__Bacteroidales; f__Muribaculaceae; g__uncultured bacterium; s__uncultured bacterium
OTU_2869	0	0	0	0	0	0	0	0	0	0	0	0	0	k__Bacteria; p__Firmicutes; c__Clostridia; o__Clostridiales; f__Ruminococcaceae
OTU_1369	0	0	0	0	0	0	0	0	0	0	0	0	1	k__Bacteria; p__Actinobacteria; c__Coriobacteriia; o__Coriobacteriales; f__uncultured; g__uncultured bacterium; s__uncultured bacterium
OTU_1757	0	0	0	0	0	0	0	0	4	3	0	1	1	k__Bacteria; p__Bacteroidetes; c__Bacteroidia; o__Bacteroidales
OTU_2380	0	0	0	0	0	0	0	0	0	0	0	0	0	k__Bacteria
OTU_2734	0	0	0	0	0	0	0	0	0	0	0	0	0	k__Bacteria
OTU_2543	0	2	1	0	0	0	0	0	0	0	0	4	13	k__Bacteria; p__Bacteroidetes; c__Bacteroidia; o__Bacteroidales; f__Muribaculaceae; g__uncultured bacterium; s__uncultured bacterium
OTU_2277	0	0	1	1	1	0	0	0	1	2	4	40	15	k__Bacteria; p__Bacteroidetes; c__Bacteroidia; o__Bacteroidales; f__Muribaculaceae; g__uncultured bacterium; s__uncultured bacterium
OTU_1946	0	0	0	0	0	0	0	0	0	0	0	0	0	k__Bacteria
OTU_2162	0	0	2	0	1	0	0	0	0	1	1	11	4	k__Bacteria; p__Bacteroidetes; c__Bacteroidia; o__Bacteroidales; f__Muribaculaceae; g__uncultured bacterium; s__uncultured bacterium
OTU_1523	0	0	0	0	1	0	0	0	0	0	0	0	4	k__Bacteria; p__Bacteroidetes; c__Bacteroidia; o__Bacteroidales; f__Rikenellaceae; g__Alistipes; s__Alistipes indistinctus YIT 12060
OTU_2059	0	1	0	0	0	0	0	0	0	0	0	0	0	k__Bacteria; p__Bacteroidetes; c__Bacteroidia; o__Bacteroidales; f__Muribaculaceae; g__uncultured Bacteroidales bacterium; s__uncultured Bacteroidales bacterium
OTU_3015	0	0	0	0	0	0	0	0	0	0	0	0	0	k__Bacteria; p__Chloroflexi; c__Anaerolineae; o__Anaerolineales; f__Anaerolineaceae; g__uncultured
OTU_2170	0	0	0	0	0	0	0	0	0	0	0	0	0	k__Bacteria; p__Firmicutes; c__Clostridia; o__Clostridiales; f__Lachnospiraceae; g__Roseburia
OTU_2411	0	0	0	0	0	0	0	0	0	0	0	0	0	k__Bacteria; p__Bacteroidetes; c__Bacteroidia; o__Bacteroidales; f__Muribaculaceae
OTU_1179	0	0	0	0	0	0	0	0	0	0	0	0	1	k__Bacteria; p__Tenericutes; c__Mollicutes; o__Mollicutes RF39; f__uncultured bacterium; g__uncultured bacterium; s__uncultured bacterium
OTU_2012	0	0	0	0	0	0	0	0	1	1	0	3	2	k__Bacteria; p__Bacteroidetes; c__Bacteroidia; o__Bacteroidales; f__Rikenellaceae; g__Rikenellaceae RC9 gut group; s__uncultured bacterium
OTU_3002	0	0	0	0	0	0	0	0	0	0	0	0	0	k__Bacteria; p__Bacteroidetes; c__Bacteroidia; o__Bacteroidales; f__Muribaculaceae; g__uncultured bacterium; s__uncultured bacterium
OTU_1999	0	0	0	0	0	0	0	0	0	0	0	0	0	k__Bacteria; p__Bacteroidetes; c__Bacteroidia; o__Bacteroidales
OTU_1592	2	0	0	1	0	0	0	0	1	0	0	0	0	k__Bacteria; p__Firmicutes; c__Clostridia; o__Clostridiales; f__Lachnospiraceae
OTU_2924	0	0	0	2	0	0	0	0	0	0	0	0	0	k__Bacteria; p__Firmicutes
OTU_2601	0	0	0	0	0	0	0	0	0	0	0	0	0	k__Bacteria; p__Bacteroidetes; c__Bacteroidia; o__Bacteroidales
OTU_2921	0	0	0	0	0	1	0	0	0	0	0	0	0	k__Bacteria; p__Firmicutes; c__Clostridia; o__Clostridiales; f__Lachnospiraceae; g__Lachnospiraceae NK4A136 group
OTU_1589	0	0	0	0	0	0	0	0	0	0	0	0	0	k__Bacteria; p__Firmicutes; c__Clostridia; o__Clostridiales; f__Ruminococcaceae; g__Ruminococcaceae UCG-014
OTU_2207	0	0	2	0	0	0	0	0	2	0	5	0	1	k__Bacteria; p__Bacteroidetes; c__Bacteroidia; o__Bacteroidales; f__Muribaculaceae; g__uncultured bacterium; s__uncultured bacterium
OTU_2073	0	0	0	0	0	0	0	0	0	0	0	0	0	k__Bacteria; p__Firmicutes; c__Clostridia; o__Clostridiales; f__Lachnospiraceae
OTU_1940	0	0	0	0	0	0	0	0	0	0	0	0	0	k__Bacteria; p__Firmicutes; c__Clostridia; o__Clostridiales; f__Lachnospiraceae
OTU_2901	0	0	0	0	1	0	0	0	0	0	0	0	0	k__Bacteria; p__Bacteroidetes; c__Bacteroidia; o__Bacteroidales; f__Muribaculaceae; g__uncultured bacterium; s__uncultured bacterium
OTU_2839	0	0	0	0	0	0	0	0	0	0	0	0	0	k__Bacteria; p__Firmicutes; c__Clostridia; o__Clostridiales; f__Lachnospiraceae
OTU_2423	0	0	0	0	0	0	0	0	0	0	0	0	0	k__Bacteria; p__Firmicutes; c__Clostridia; o__Clostridiales; f__Lachnospiraceae
OTU_247	0	22	0	1	0	8	2	2	0	0	0	0	0	k__Bacteria; p__Firmicutes; c__Clostridia; o__Clostridiales; f__Lachnospiraceae; g__uncultured; s__uncultured bacterium
OTU_1188	0	1	0	1	0	3	0	0	0	0	0	0	0	k__Bacteria; p__Firmicutes; c__Clostridia; o__Clostridiales; f__Lachnospiraceae
OTU_2931	1	1	0	0	0	0	0	0	0	2	0	0	0	k__Bacteria; p__Bacteroidetes; c__Bacteroidia; o__Bacteroidales; f__Muribaculaceae; g__uncultured bacterium; s__uncultured bacterium
OTU_2729	0	0	0	0	0	0	0	0	0	0	0	0	0	k__Bacteria
OTU_1551	0	0	0	0	0	0	0	0	0	0	0	0	0	k__Bacteria; p__Firmicutes; c__Clostridia; o__Clostridiales; f__Lachnospiraceae
OTU_1234	0	3	0	0	0	1	0	0	0	1	0	0	0	k__Bacteria; p__Firmicutes; c__Clostridia; o__Clostridiales; f__Ruminococcaceae; g__Oscillibacter
OTU_1976	0	0	0	0	0	0	0	0	0	0	0	0	0	k__Bacteria; p__Firmicutes; c__Clostridia; o__Clostridiales; f__Ruminococcaceae; g__Ruminococcaceae UCG-010
OTU_1578	0	0	0	0	0	0	0	0	0	0	0	0	0	k__Bacteria; p__Bacteroidetes; c__Bacteroidia; o__Bacteroidales; f__Marinifilaceae; g__Odoribacter; s__uncultured bacterium
OTU_2720	1	0	0	0	0	0	0	0	1	0	0	0	0	k__Bacteria; p__Bacteroidetes; c__Bacteroidia; o__Bacteroidales; f__Muribaculaceae
OTU_829	0	0	0	0	0	0	0	0	0	0	0	0	0	k__Bacteria; p__Firmicutes; c__Erysipelotrichia; o__Erysipelotrichales; f__Erysipelotrichaceae; g__Ileibacterium; s__Erysipelotrichaceae bacterium NYU-BL-F16
OTU_517	0	1	0	1	0	1	0	0	1	0	0	0	0	k__Bacteria; p__Firmicutes; c__Clostridia; o__Clostridiales; f__Ruminococcaceae; g__Anaerotruncus; s__uncultured bacterium
OTU_1330	0	1	0	0	0	0	0	0	0	0	4	1	0	k__Bacteria; p__Bacteroidetes; c__Bacteroidia; o__Bacteroidales; f__Muribaculaceae; g__uncultured bacterium; s__uncultured bacterium
OTU_2303	0	0	1	0	0	0	0	0	1	1	0	0	0	k__Bacteria
OTU_3025	0	0	0	0	0	0	0	0	0	0	0	0	0	k__Bacteria; p__Bacteroidetes; c__Bacteroidia; o__Bacteroidales
OTU_1331	0	0	0	0	0	0	0	0	0	0	0	0	0	k__Bacteria; p__Bacteroidetes; c__Bacteroidia; o__Bacteroidales; f__Muribaculaceae; g__uncultured bacterium; s__uncultured bacterium
OTU_2785	2	0	2	1	0	1	0	0	0	2	0	0	2	k__Bacteria; p__Bacteroidetes; c__Bacteroidia; o__Bacteroidales
OTU_649	0	0	1	0	0	0	4	0	1	1	0	1	0	k__Bacteria; p__Proteobacteria; c__Deltaproteobacteria; o__Desulfovibrionales; f__Desulfovibrionaceae; g__Desulfovibrio; s__Desulfovibrio fairfieldensis
OTU_642	0	0	0	1	0	0	0	0	0	0	0	3	1	k__Bacteria; p__Firmicutes; c__Bacilli; o__Lactobacillales; f__Streptococcaceae; g__Streptococcus; s__Streptococcus agalactiae
OTU_1714	1	0	1	0	0	0	0	0	0	0	0	0	2	k__Bacteria; p__Bacteroidetes; c__Bacteroidia; o__Bacteroidales; f__Muribaculaceae
OTU_1928	0	0	0	0	0	2	0	0	0	0	0	0	0	k__Bacteria; p__Firmicutes; c__Clostridia; o__Clostridiales; f__Lachnospiraceae
OTU_1857	0	0	1	0	0	0	0	0	0	1	0	0	0	k__Bacteria; p__Bacteroidetes; c__Bacteroidia; o__Bacteroidales; f__Muribaculaceae; g__uncultured bacterium; s__uncultured bacterium
OTU_1431	1	2	0	0	0	0	0	0	0	0	0	0	1	k__Bacteria; p__Bacteroidetes; c__Bacteroidia; o__Bacteroidales; f__Muribaculaceae; g__Muribaculum; s__Parabacteroides sp. YL27
OTU_2585	0	0	0	1	0	0	0	0	0	0	1	0	0	k__Bacteria; p__Actinobacteria; c__Actinobacteria; o__Propionibacteriales; f__Propionibacteriaceae; g__Cutibacterium; s__Propionibacterium sp. KPL1844
OTU_771	0	0	0	0	0	0	0	0	0	0	0	0	0	k__Bacteria; p__Firmicutes; c__Clostridia; o__Clostridiales; f__Ruminococcaceae; g__Butyricicoccus; s__uncultured bacterium
OTU_2779	0	0	0	0	0	1	0	0	0	0	0	0	0	k__Bacteria; p__Bacteroidetes; c__Bacteroidia; o__Bacteroidales; f__Bacteroidaceae; g__Bacteroides
OTU_2879	0	0	0	0	3	0	0	0	0	0	0	0	3	k__Bacteria; p__Bacteroidetes; c__Bacteroidia; o__Bacteroidales; f__Muribaculaceae
OTU_2211	0	0	0	0	0	2	0	0	0	0	0	0	0	k__Bacteria; p__Firmicutes; c__Clostridia; o__Clostridiales; f__Ruminococcaceae
OTU_1632	0	0	0	0	0	0	0	0	1	0	0	0	0	k__Bacteria
OTU_1265	0	1	0	0	0	0	0	0	0	0	0	0	0	k__Bacteria
OTU_1317	0	0	0	0	0	0	0	0	0	0	0	0	0	k__Bacteria; p__Proteobacteria; c__Gammaproteobacteria; o__Pseudomonadales; f__Moraxellaceae; g__Acinetobacter
OTU_588	4	0	1	0	0	0	1	0	0	1	0	2	8	k__Bacteria; p__Bacteroidetes; c__Bacteroidia; o__Flavobacteriales; f__Weeksellaceae; g__Cloacibacterium; s__uncultured bacterium
OTU_1492	0	0	0	0	0	0	0	0	0	0	0	0	0	k__Bacteria
OTU_967	0	0	0	0	0	2	0	0	0	1	0	0	0	k__Bacteria; p__Firmicutes; c__Clostridia; o__Clostridiales; f__Lachnospiraceae
OTU_1934	0	0	0	0	0	0	0	0	0	0	0	0	0	k__Bacteria; p__Firmicutes; c__Clostridia; o__Clostridiales; f__Ruminococcaceae; g__Ruminiclostridium 9; s__uncultured bacterium
OTU_2614	0	0	0	0	0	0	0	0	0	0	0	0	0	k__Bacteria; p__Bacteroidetes; c__Bacteroidia; o__Bacteroidales; f__Muribaculaceae; g__uncultured bacterium; s__uncultured bacterium
OTU_1180	0	0	0	0	0	0	0	0	0	0	0	0	0	k__Bacteria; p__Firmicutes; c__Clostridia; o__Clostridiales; f__Ruminococcaceae; g__Hydrogenoanaerobacterium; s__uncultured bacterium
OTU_1256	6	0	9	0	2	0	0	0	0	0	2	0	3	k__Bacteria; p__Bacteroidetes; c__Bacteroidia; o__Bacteroidales; f__Muribaculaceae; g__uncultured bacterium; s__uncultured bacterium
OTU_1291	7	0	7	0	3	0	0	0	1	0	0	0	0	k__Bacteria; p__Bacteroidetes; c__Bacteroidia; o__Bacteroidales; f__Muribaculaceae; g__uncultured bacterium; s__uncultured bacterium
OTU_1631	1	3	0	0	0	0	0	0	0	1	0	0	2	k__Bacteria; p__Bacteroidetes; c__Bacteroidia; o__Bacteroidales; f__Muribaculaceae; g__uncultured bacterium; s__uncultured bacterium
OTU_2983	0	0	0	0	0	0	0	0	1	0	3	0	0	k__Bacteria; p__Bacteroidetes; c__Bacteroidia; o__Bacteroidales; f__Muribaculaceae; g__uncultured bacterium; s__uncultured bacterium
OTU_2475	0	0	0	0	0	0	0	0	0	0	0	0	0	k__Bacteria; p__Firmicutes; c__Clostridia; o__Clostridiales; f__Lachnospiraceae
OTU_1686	0	0	2	0	0	0	0	0	0	0	0	0	0	k__Bacteria; p__Bacteroidetes; c__Bacteroidia; o__Bacteroidales; f__Bacteroidaceae; g__Bacteroides
OTU_2665	1	0	3	0	0	0	0	0	0	0	0	0	0	k__Bacteria; p__Bacteroidetes; c__Bacteroidia; o__Bacteroidales; f__Muribaculaceae; g__uncultured bacterium; s__uncultured bacterium
OTU_820	0	0	0	0	0	0	0	0	6	0	0	0	0	k__Bacteria; p__Firmicutes; c__Clostridia; o__Clostridiales; f__Clostridiales vadinBB60 group; g__uncultured bacterium; s__uncultured bacterium
OTU_2289	0	0	0	0	0	0	0	0	0	0	0	3	0	k__Bacteria; p__Bacteroidetes; c__Bacteroidia; o__Bacteroidales; f__Muribaculaceae
OTU_2294	0	3	0	5	0	2	3	0	0	4	0	0	1	k__Bacteria; p__Firmicutes; c__Clostridia; o__Clostridiales; f__Lachnospiraceae
OTU_1503	4	0	2	0	2	0	0	0	0	0	0	0	5	k__Bacteria; p__Bacteroidetes; c__Bacteroidia; o__Bacteroidales; f__Muribaculaceae; g__uncultured bacterium; s__uncultured bacterium
OTU_3009	0	0	0	0	0	0	0	0	0	0	0	0	0	k__Bacteria; p__Bacteroidetes; c__Bacteroidia; o__Bacteroidales; f__Muribaculaceae
OTU_2278	0	0	0	0	0	0	0	0	0	0	0	0	0	k__Bacteria; p__Bacteroidetes; c__Bacteroidia; o__Bacteroidales
OTU_2034	0	0	0	0	1	0	0	0	0	0	0	2	0	k__Bacteria; p__Bacteroidetes; c__Bacteroidia; o__Bacteroidales; f__Muribaculaceae; g__uncultured bacterium; s__uncultured bacterium
OTU_540	0	2	1	0	0	11	0	0	0	0	0	0	0	k__Bacteria; p__Firmicutes; c__Clostridia; o__Clostridiales; f__Lachnospiraceae; g__Roseburia; s__uncultured bacterium
OTU_1992	0	0	0	0	0	0	0	0	0	0	0	0	0	k__Bacteria; p__Bacteroidetes; c__Bacteroidia; o__Bacteroidales
OTU_1780	0	0	0	0	0	0	0	0	0	0	0	0	0	k__Bacteria; p__Firmicutes; c__Clostridia; o__Clostridiales
OTU_1394	0	0	0	0	7	0	1	0	0	0	1	0	0	k__Bacteria; p__Firmicutes; c__Clostridia; o__Clostridiales; f__Lachnospiraceae; g__Blautia
OTU_2870	0	1	0	0	0	0	0	0	0	0	0	0	0	k__Bacteria; p__Firmicutes; c__Clostridia; o__Clostridiales; f__Ruminococcaceae; g__Ruminococcaceae UCG-014
OTU_1425	0	0	0	0	0	0	0	0	0	0	0	0	0	k__Bacteria; p__Bacteroidetes; c__Bacteroidia; o__Bacteroidales; f__Muribaculaceae
OTU_2080	0	0	0	0	0	0	0	0	0	1	0	2	0	k__Bacteria; p__Bacteroidetes; c__Bacteroidia; o__Bacteroidales; f__Rikenellaceae; g__Alistipes
OTU_1966	0	0	0	0	0	0	0	0	0	0	0	0	0	k__Bacteria; p__Bacteroidetes; c__Bacteroidia; o__Bacteroidales
OTU_2632	0	0	0	0	0	0	0	0	0	0	0	0	0	k__Bacteria; p__Bacteroidetes; c__Bacteroidia; o__Bacteroidales; f__Muribaculaceae; g__uncultured bacterium; s__uncultured bacterium
OTU_1953	0	0	0	0	0	0	0	0	0	0	0	0	0	k__Bacteria; p__Bacteroidetes; c__Bacteroidia; o__Bacteroidales; f__Muribaculaceae
OTU_2608	0	0	0	0	0	0	0	0	0	0	0	0	0	k__Bacteria; p__Bacteroidetes; c__Bacteroidia; o__Bacteroidales
OTU_2400	0	0	0	0	0	0	0	0	0	0	0	0	0	k__Bacteria; p__Firmicutes; c__Clostridia; o__Clostridiales; f__Ruminococcaceae
OTU_526	0	0	0	0	0	1	16	0	0	0	0	0	3	k__Bacteria; p__Firmicutes; c__Clostridia; o__Clostridiales; f__Lachnospiraceae
OTU_2046	0	0	0	0	0	0	0	0	0	0	0	0	0	k__Bacteria; p__Proteobacteria; c__Alphaproteobacteria; o__Elsterales; f__uncultured; g__uncultured forest soil bacterium; s__uncultured forest soil bacterium
OTU_2357	0	0	0	0	0	0	0	0	0	0	0	0	0	k__Bacteria; p__Firmicutes; c__Clostridia; o__Clostridiales; f__Lachnospiraceae; g__Lachnospiraceae NK4A136 group; s__uncultured bacterium
OTU_1231	0	0	0	0	0	0	0	0	0	0	1	0	0	k__Bacteria; p__Bacteroidetes; c__Bacteroidia; o__Bacteroidales; f__Muribaculaceae; g__uncultured bacterium; s__uncultured bacterium
OTU_2110	0	5	0	0	0	0	0	0	1	0	2	1	5	k__Bacteria
OTU_2103	0	2	0	0	0	2	0	0	0	1	0	2	0	k__Bacteria
OTU_1660	0	0	0	0	2	0	0	0	0	0	0	3	0	k__Bacteria; p__Bacteroidetes; c__Bacteroidia; o__Bacteroidales; f__Muribaculaceae; g__uncultured bacterium; s__uncultured bacterium
OTU_2856	0	0	1	0	0	0	0	0	0	3	0	0	0	k__Bacteria
OTU_1677	0	0	0	0	1	1	0	0	0	0	0	0	0	k__Bacteria; p__Bacteroidetes; c__Bacteroidia; o__Bacteroidales; f__Muribaculaceae; g__uncultured bacterium; s__uncultured bacterium
OTU_1493	0	0	0	0	0	0	0	0	0	0	0	0	0	k__Bacteria
OTU_2256	0	3	0	0	0	0	0	0	0	0	0	0	0	k__Bacteria; p__Bacteroidetes; c__Bacteroidia; o__Bacteroidales; f__Muribaculaceae; g__uncultured bacterium; s__uncultured bacterium
OTU_1417	0	1	0	0	0	0	0	0	1	0	1	0	1	k__Bacteria
OTU_844	0	0	3	0	0	0	0	1	0	0	0	0	0	k__Bacteria; p__Tenericutes; c__Mollicutes; o__Mollicutes RF39; f__uncultured bacterium; g__uncultured bacterium; s__uncultured bacterium
OTU_1908	0	0	0	0	0	0	0	0	0	0	0	0	1	k__Bacteria; p__Bacteroidetes; c__Bacteroidia; o__Bacteroidales; f__Muribaculaceae
OTU_1708	0	0	0	0	0	0	0	0	0	0	0	0	0	k__Bacteria; p__Firmicutes; c__Clostridia; o__Clostridiales; f__Lachnospiraceae
OTU_2838	0	0	0	0	1	0	0	0	0	0	0	0	0	k__Bacteria; p__Actinobacteria; c__Actinobacteria; o__Propionibacteriales; f__Propionibacteriaceae
OTU_958	0	0	3	0	0	0	0	0	0	0	0	0	0	k__Bacteria; p__Firmicutes; c__Clostridia; o__Clostridiales; f__Ruminococcaceae; g__[Eubacterium] coprostanoligenes group
OTU_1810	0	0	0	0	0	0	0	0	0	1	0	0	0	k__Bacteria; p__Firmicutes; c__Clostridia; o__Clostridiales; f__Lachnospiraceae; g__uncultured; s__uncultured bacterium
OTU_1404	0	0	0	0	0	1	0	0	0	0	0	0	0	k__Bacteria; p__Firmicutes; c__Clostridia; o__Clostridiales; f__Lachnospiraceae; g__Tyzzerella
OTU_1365	0	0	0	0	0	0	0	0	0	0	0	0	0	k__Bacteria; p__Firmicutes; c__Clostridia; o__Clostridiales; f__Lachnospiraceae
OTU_391	0	0	0	0	0	0	0	2	0	0	0	0	0	k__Bacteria; p__Firmicutes; c__Clostridia; o__Clostridiales; f__Ruminococcaceae; g__Ruminococcaceae UCG-014; s__uncultured rumen bacterium
OTU_2526	0	1	0	0	0	0	0	0	0	0	0	0	0	k__Bacteria; p__Firmicutes; c__Clostridia; o__Clostridiales; f__Lachnospiraceae; g__Lachnospiraceae UCG-006; s__uncultured bacterium
OTU_1113	0	0	0	0	0	0	0	0	0	0	0	0	0	k__Bacteria; p__Bacteroidetes; c__Bacteroidia; o__Bacteroidales; f__Prevotellaceae; g__Prevotellaceae NK3B31 group; s__uncultured bacterium
OTU_1751	0	1	0	0	0	3	0	0	1	0	0	0	0	k__Bacteria; p__Firmicutes; c__Clostridia; o__Clostridiales; f__Ruminococcaceae; g__Ruminiclostridium; s__uncultured bacterium
OTU_2611	0	0	0	0	0	0	0	0	0	0	0	0	0	k__Bacteria; p__Bacteroidetes; c__Bacteroidia; o__Bacteroidales
OTU_1480	0	0	0	0	0	0	0	0	0	0	0	0	0	k__Bacteria; p__Firmicutes; c__Clostridia; o__Clostridiales; f__Lachnospiraceae
OTU_2951	0	0	0	0	0	0	0	0	0	0	0	0	0	k__Bacteria; p__Bacteroidetes; c__Bacteroidia; o__Bacteroidales; f__Muribaculaceae
OTU_2445	0	0	0	0	0	0	0	0	0	0	0	0	0	k__Bacteria; p__Firmicutes; c__Clostridia; o__Clostridiales
OTU_1042	0	0	0	10	0	3	0	0	0	4	0	1	3	k__Bacteria; p__Firmicutes; c__Clostridia; o__Clostridiales; f__Ruminococcaceae; g__Oscillibacter; s__uncultured bacterium
OTU_2096	0	0	0	0	0	0	0	0	0	0	0	0	1	k__Bacteria; p__Firmicutes; c__Clostridia; o__Clostridiales; f__Ruminococcaceae
OTU_297	0	5	0	0	0	20	12	1	0	0	0	0	0	k__Bacteria; p__Firmicutes; c__Clostridia; o__Clostridiales; f__Ruminococcaceae; g__Butyricicoccus; s__uncultured bacterium
OTU_2245	0	0	0	0	0	0	0	0	0	0	0	0	1	k__Bacteria; p__Bacteroidetes; c__Bacteroidia; o__Bacteroidales; f__Muribaculaceae; g__uncultured bacterium; s__uncultured bacterium
OTU_2637	0	0	1	1	0	0	0	0	0	1	1	1	1	k__Bacteria; p__Bacteroidetes; c__Bacteroidia; o__Bacteroidales
OTU_2054	0	0	0	0	0	0	0	0	0	0	0	0	0	k__Bacteria; p__Bacteroidetes; c__Bacteroidia; o__Bacteroidales; f__Muribaculaceae; g__uncultured bacterium; s__uncultured bacterium
OTU_1575	0	0	0	0	0	0	0	0	0	0	0	0	0	k__Bacteria; p__Bacteroidetes; c__Bacteroidia; o__Bacteroidales; f__Muribaculaceae; g__uncultured bacterium; s__uncultured bacterium
OTU_1029	0	0	0	0	2	0	0	0	0	0	0	0	0	k__Bacteria; p__Bacteroidetes; c__Bacteroidia; o__Bacteroidales; f__Muribaculaceae; g__uncultured bacterium; s__uncultured bacterium
OTU_1470	0	0	0	0	0	0	0	0	0	0	0	0	0	k__Bacteria
OTU_1650	0	1	0	0	0	0	0	0	0	0	0	0	0	k__Bacteria; p__Firmicutes; c__Clostridia; o__Clostridiales
OTU_2172	0	0	0	0	0	0	0	0	0	0	0	0	0	k__Bacteria; p__Firmicutes; c__Clostridia; o__Clostridiales; f__Lachnospiraceae
OTU_2322	0	0	0	0	0	0	0	0	0	0	0	0	0	k__Bacteria; p__Firmicutes; c__Clostridia; o__Clostridiales; f__Ruminococcaceae
OTU_1865	0	0	0	0	0	0	0	0	0	0	0	0	0	k__Bacteria; p__Firmicutes; c__Clostridia; o__Clostridiales
OTU_2704	0	0	0	0	0	0	0	0	0	0	0	0	0	k__Bacteria; p__Firmicutes; c__Clostridia; o__Clostridiales
OTU_645	0	0	1	0	0	0	0	0	0	0	0	2	0	k__Bacteria; p__Firmicutes; c__Clostridia; o__Clostridiales; f__Ruminococcaceae
OTU_2843	0	0	0	0	1	0	0	0	0	0	0	0	0	k__Bacteria; p__Firmicutes; c__Clostridia; o__Clostridiales; f__Ruminococcaceae
OTU_1619	0	0	0	0	0	0	0	0	0	0	0	0	0	k__Bacteria; p__Firmicutes; c__Clostridia; o__Clostridiales
OTU_1362	0	0	0	0	0	1	0	0	0	0	0	0	0	k__Bacteria
OTU_2060	0	0	0	0	0	0	0	0	0	0	0	0	0	k__Bacteria
OTU_2933	0	0	0	0	0	3	0	0	0	1	0	0	1	k__Bacteria; p__Bacteroidetes; c__Bacteroidia; o__Bacteroidales
OTU_567	0	2	0	0	0	1	0	0	0	0	1	0	0	k__Bacteria; p__Firmicutes; c__Clostridia; o__Clostridiales; f__Ruminococcaceae; g__Papillibacter; s__uncultured bacterium
OTU_2746	0	0	0	0	0	0	0	0	0	0	0	0	0	k__Bacteria; p__Bacteroidetes; c__Bacteroidia; o__Bacteroidales; f__Muribaculaceae
OTU_2607	0	0	0	0	1	0	0	0	0	0	0	2	0	k__Bacteria
OTU_1949	0	0	0	0	0	0	0	0	0	0	0	0	0	k__Bacteria
OTU_1978	4	1	0	0	0	0	0	0	2	1	0	0	0	k__Bacteria; p__Bacteroidetes; c__Bacteroidia; o__Bacteroidales; f__Muribaculaceae; g__uncultured bacterium; s__uncultured bacterium
OTU_1052	0	0	0	0	0	0	0	0	0	0	0	0	0	k__Bacteria; p__Tenericutes; c__Mollicutes; o__Mollicutes RF39
OTU_1888	0	0	0	0	0	0	0	0	0	0	0	0	0	k__Bacteria; p__Firmicutes; c__Clostridia; o__Clostridiales; f__Family XI; g__Peptoniphilus; s__uncultured bacterium
OTU_673	0	0	0	0	0	0	0	2	0	0	0	0	0	k__Bacteria; p__Proteobacteria; c__Deltaproteobacteria; o__Bdellovibrionales; f__Bdellovibrionaceae; g__Bdellovibrio; s__uncultured bacterium
OTU_929	0	0	0	0	0	0	0	0	0	0	0	0	0	k__Bacteria; p__Firmicutes; c__Erysipelotrichia; o__Erysipelotrichales; f__Erysipelotrichaceae; g__Erysipelotrichaceae UCG-009; s__uncultured rumen bacterium
OTU_1022	0	3	0	0	0	4	0	0	0	0	0	0	0	k__Bacteria; p__Firmicutes; c__Clostridia; o__Clostridiales; f__Lachnospiraceae
OTU_1805	0	0	0	0	1	0	0	0	0	0	0	1	0	k__Bacteria; p__Bacteroidetes; c__Bacteroidia; o__Bacteroidales; f__Muribaculaceae; g__uncultured bacterium; s__uncultured bacterium
OTU_763	0	4	0	0	0	2	3	0	0	0	1	0	0	k__Bacteria; p__Firmicutes; c__Clostridia; o__Clostridiales; f__Lachnospiraceae
OTU_1958	0	0	0	0	0	0	0	0	0	0	0	0	0	k__Bacteria; p__Firmicutes; c__Clostridia; o__Clostridiales; f__Lachnospiraceae
OTU_320	0	0	0	0	0	0	0	0	0	0	0	0	0	k__Bacteria; p__Tenericutes; c__Mollicutes; o__Anaeroplasmatales; f__Anaeroplasmataceae; g__Anaeroplasma; s__uncultured bacterium
OTU_1019	1	0	0	0	0	0	0	0	0	0	2	2	0	k__Bacteria; p__Bacteroidetes; c__Bacteroidia; o__Bacteroidales; f__Muribaculaceae; g__uncultured bacterium; s__uncultured bacterium
OTU_953	0	0	0	0	0	0	0	0	0	0	0	0	0	k__Bacteria; p__Firmicutes; c__Clostridia; o__Clostridiales; f__Ruminococcaceae; g__Ruminococcaceae UCG-010
OTU_537	0	0	0	0	0	0	0	0	0	0	0	0	0	k__Bacteria; p__Bacteroidetes; c__Bacteroidia; o__Sphingobacteriales; f__Sphingobacteriaceae; g__Sphingobacterium
OTU_1030	0	0	0	0	0	0	0	0	0	0	0	0	0	k__Bacteria; p__Bacteroidetes; c__Bacteroidia; o__Sphingobacteriales; f__AKYH767
OTU_1446	0	0	0	0	0	0	0	0	0	0	0	0	0	k__Bacteria; p__Bacteroidetes; c__Bacteroidia; o__Bacteroidales; f__Muribaculaceae; g__uncultured bacterium; s__uncultured bacterium
OTU_931	0	0	0	0	0	0	0	0	0	0	0	0	0	k__Bacteria; p__Firmicutes; c__Clostridia; o__Clostridiales; f__Christensenellaceae; g__Christensenellaceae R-7 group; s__uncultured Firmicutes bacterium
OTU_1009	0	0	0	0	0	0	0	0	0	0	0	0	0	k__Bacteria; p__Bacteroidetes; c__Bacteroidia; o__Bacteroidales; f__Muribaculaceae; g__uncultured bacterium; s__uncultured bacterium
OTU_82	0	0	1	0	0	0	29	0	581	0	0	0	0	k__Bacteria; p__Firmicutes; c__Erysipelotrichia; o__Erysipelotrichales; f__Erysipelotrichaceae; g__Candidatus Stoquefichus; s__uncultured bacterium
OTU_1140	0	0	0	0	0	0	0	0	0	0	0	0	0	k__Bacteria; p__Bacteroidetes; c__Bacteroidia; o__Bacteroidales; f__Muribaculaceae; g__gut metagenome; s__gut metagenome
OTU_1051	0	0	0	0	0	0	0	0	0	0	0	0	0	k__Bacteria; p__Bacteroidetes; c__Bacteroidia; o__Bacteroidales; f__Muribaculaceae; g__uncultured bacterium; s__uncultured bacterium
OTU_1111	0	0	0	0	0	0	0	0	0	0	0	0	0	k__Bacteria; p__Firmicutes; c__Clostridia; o__Clostridiales; f__Ruminococcaceae
OTU_846	0	0	0	0	0	0	0	0	0	0	0	0	0	k__Bacteria; p__Bacteroidetes; c__Bacteroidia; o__Bacteroidales; f__Muribaculaceae; g__uncultured bacterium; s__uncultured bacterium
OTU_1298	0	0	0	0	0	0	0	0	0	0	0	0	0	k__Bacteria; p__Bacteroidetes; c__Bacteroidia; o__Bacteroidales; f__Muribaculaceae; g__uncultured bacterium; s__uncultured bacterium
OTU_2064	0	0	1	0	0	0	0	0	1	0	0	0	0	k__Bacteria; p__Bacteroidetes; c__Bacteroidia; o__Bacteroidales
OTU_713	0	0	0	0	0	0	4	0	0	0	0	0	0	k__Bacteria; p__Firmicutes; c__Clostridia; o__Clostridiales; f__Ruminococcaceae; g__Ruminococcus 1
OTU_769	0	3	2	0	0	0	0	0	0	0	0	0	4	k__Bacteria; p__Proteobacteria; c__Gammaproteobacteria; o__Pasteurellales; f__Pasteurellaceae; g__Haemophilus
OTU_459	0	0	0	0	0	0	0	0	0	0	0	0	0	k__Bacteria; p__Firmicutes; c__Clostridia; o__Clostridiales; f__Ruminococcaceae; g__Ruminococcaceae UCG-002; s__uncultured organism
OTU_996	0	0	0	0	0	0	0	3	0	0	0	0	1	k__Bacteria; p__Proteobacteria; c__Gammaproteobacteria; o__Xanthomonadales; f__Xanthomonadaceae; g__Stenotrophomonas; s__Stenotrophomonas maltophilia
OTU_799	0	0	0	0	0	0	0	0	0	0	0	0	0	k__Bacteria; p__Firmicutes; c__Clostridia; o__Clostridiales; f__Ruminococcaceae; g__[Eubacterium] coprostanoligenes group; s__human gut metagenome
OTU_644	4	0	5	0	5	0	1	0	0	0	0	0	0	k__Bacteria; p__Firmicutes; c__Bacilli; o__Lactobacillales; f__Lactobacillaceae; g__Lactobacillus; s__Lactobacillus iners AB-1
OTU_675	0	0	0	0	0	0	7	0	0	0	0	0	0	k__Bacteria; p__Firmicutes; c__Clostridia; o__Clostridiales; f__Lachnospiraceae; g__[Eubacterium] ruminantium group; s__uncultured bacterium
OTU_2005	0	0	1	1	0	0	0	0	0	0	0	0	0	k__Bacteria; p__Bacteroidetes; c__Bacteroidia; o__Bacteroidales; f__Muribaculaceae; g__uncultured bacterium; s__uncultured bacterium
OTU_2323	0	6	1	0	0	0	0	0	0	0	2	1	0	k__Bacteria; p__Bacteroidetes; c__Bacteroidia; o__Bacteroidales; f__Muribaculaceae
OTU_1363	0	0	0	0	0	2	0	0	0	0	0	0	0	k__Bacteria; p__Firmicutes; c__Clostridia; o__Clostridiales
OTU_1474	0	0	0	0	0	0	0	0	0	1	0	1	0	k__Bacteria; p__Bacteroidetes; c__Bacteroidia; o__Bacteroidales
OTU_826	0	0	0	0	0	0	0	0	0	0	0	0	0	k__Bacteria; p__Proteobacteria; c__Gammaproteobacteria; o__Alteromonadales; f__uncultured; g__Idiomarina sp.; s__Idiomarina sp.
OTU_2366	0	0	0	1	0	0	0	0	0	0	0	0	0	k__Bacteria; p__Firmicutes; c__Clostridia; o__Clostridiales
OTU_2575	0	0	0	0	0	0	0	0	0	2	0	0	0	k__Bacteria; p__Firmicutes; c__Clostridia; o__Clostridiales; f__Lachnospiraceae; g__uncultured; s__uncultured bacterium
OTU_2392	0	0	0	0	0	2	0	0	0	0	1	0	0	k__Bacteria; p__Firmicutes; c__Clostridia; o__Clostridiales; f__Ruminococcaceae
OTU_2705	0	0	0	0	0	0	0	0	0	0	0	0	0	k__Bacteria; p__Bacteroidetes; c__Bacteroidia; o__Bacteroidales
OTU_1361	0	1	0	0	0	0	0	0	0	0	0	0	1	k__Bacteria; p__Firmicutes; c__Clostridia; o__Clostridiales; f__Ruminococcaceae
OTU_1092	0	0	0	0	0	0	0	0	0	0	0	0	1	k__Bacteria; p__Proteobacteria; c__Gammaproteobacteria; o__Betaproteobacteriales; f__Burkholderiaceae; g__Massilia; s__uncultured bacterium
OTU_1777	0	1	0	0	0	0	0	0	0	0	0	0	0	k__Bacteria; p__Firmicutes; c__Clostridia; o__Clostridiales; f__Lachnospiraceae
OTU_1472	0	0	0	0	0	2	0	0	0	0	0	0	0	k__Bacteria; p__Firmicutes; c__Clostridia; o__Clostridiales
OTU_1177	0	0	0	0	1	0	0	0	0	0	0	0	0	k__Bacteria; p__Firmicutes; c__Clostridia; o__Clostridiales; f__Lachnospiraceae
OTU_2982	0	0	0	0	0	0	0	0	0	0	0	1	0	k__Bacteria; p__Firmicutes; c__Clostridia; o__Clostridiales; f__Family XI; g__Peptoniphilus; s__uncultured organism
OTU_2457	2	0	0	0	0	0	0	0	1	0	0	0	0	k__Bacteria; p__Firmicutes; c__Clostridia; o__Clostridiales; f__Lachnospiraceae
OTU_2972	1	0	0	0	0	0	0	0	0	0	0	0	0	k__Bacteria
OTU_1028	0	0	0	0	0	0	0	0	0	0	0	0	0	k__Bacteria; p__Firmicutes; c__Bacilli; o__Lactobacillales; f__Aerococcaceae; g__Facklamia; s__uncultured bacterium
OTU_2770	0	0	0	0	0	0	0	0	2	0	0	0	0	k__Bacteria; p__Bacteroidetes; c__Bacteroidia; o__Bacteroidales
OTU_1926	0	0	0	0	0	0	0	0	0	0	0	0	0	k__Bacteria; p__Actinobacteria; c__Actinobacteria; o__Streptosporangiales; f__Nocardiopsaceae; g__Nocardiopsis
OTU_1230	0	0	0	0	0	0	0	0	0	0	0	0	0	k__Bacteria; p__Firmicutes; c__Clostridia; o__Clostridiales; f__Lachnospiraceae; g__[Eubacterium] oxidoreducens group; s__uncultured bacterium
OTU_2459	0	0	0	0	0	0	0	1	0	0	0	0	0	k__Bacteria; p__Firmicutes; c__Bacilli; o__Lactobacillales; f__Leuconostocaceae; g__Leuconostoc; s__Leuconostoc mesenteroides
OTU_2886	0	0	0	0	0	0	0	0	0	0	0	0	0	k__Bacteria; p__Bacteroidetes; c__Bacteroidia; o__Bacteroidales; f__Muribaculaceae; g__uncultured bacterium; s__uncultured bacterium
OTU_1912	0	1	0	0	0	0	0	0	0	0	0	0	0	k__Bacteria; p__Bacteroidetes; c__Bacteroidia; o__Bacteroidales; f__Muribaculaceae; g__uncultured bacterium; s__uncultured bacterium
OTU_2093	0	4	0	0	0	0	0	0	0	1	1	1	3	k__Bacteria; p__Bacteroidetes; c__Bacteroidia; o__Bacteroidales; f__Muribaculaceae; g__uncultured bacterium; s__uncultured bacterium
OTU_1849	3	0	2	0	2	0	0	0	0	4	8	21	9	k__Bacteria; p__Bacteroidetes; c__Bacteroidia; o__Bacteroidales; f__Muribaculaceae; g__uncultured bacterium; s__uncultured bacterium
OTU_746	0	0	0	0	0	0	0	0	0	0	0	0	1	k__Bacteria; p__Firmicutes; c__Bacilli; o__Lactobacillales
OTU_2765	0	0	0	0	1	0	0	0	0	0	0	1	4	k__Bacteria; p__Bacteroidetes; c__Bacteroidia; o__Bacteroidales; f__Muribaculaceae; g__uncultured bacterium; s__uncultured bacterium
OTU_2190	0	0	1	0	2	0	0	0	0	1	4	10	5	k__Bacteria; p__Bacteroidetes; c__Bacteroidia; o__Bacteroidales; f__Muribaculaceae; g__uncultured bacterium; s__uncultured bacterium
OTU_1623	0	2	0	0	0	0	0	0	0	0	11	8	2	k__Bacteria; p__Bacteroidetes; c__Bacteroidia; o__Bacteroidales; f__Muribaculaceae; g__uncultured bacterium; s__uncultured bacterium
OTU_704	0	0	0	0	0	0	0	0	0	0	0	0	0	k__Bacteria; p__Bacteroidetes; c__Bacteroidia; o__Bacteroidales; f__Prevotellaceae; g__Prevotella; s__Prevotella disiens JCM 6334 = ATCC 29426
OTU_1338	0	0	0	0	0	0	0	0	0	0	0	0	0	k__Bacteria; p__Bacteroidetes; c__Bacteroidia; o__Bacteroidales; f__Muribaculaceae; g__uncultured bacterium; s__uncultured bacterium
OTU_878	0	0	0	0	0	0	0	0	0	0	0	0	0	k__Bacteria; p__Bacteroidetes; c__Bacteroidia; o__Cytophagales; f__Hymenobacteraceae; g__Adhaeribacter; s__uncultured soil bacterium
OTU_1220	0	0	0	0	0	0	0	0	0	0	0	0	0	k__Bacteria; p__Bacteroidetes; c__Bacteroidia; o__Bacteroidales
OTU_714	1	0	1	0	0	0	0	0	2	0	0	0	0	k__Bacteria; p__Firmicutes; c__Clostridia; o__Clostridiales; f__Ruminococcaceae; g__Ruminococcaceae UCG-002
OTU_924	0	0	0	0	0	0	0	0	0	0	0	0	0	k__Bacteria; p__Bacteroidetes; c__Bacteroidia; o__Bacteroidales; f__Muribaculaceae
OTU_1204	0	0	0	0	0	0	0	0	0	0	0	0	0	k__Bacteria; p__Bacteroidetes; c__Bacteroidia; o__Bacteroidales; f__Muribaculaceae; g__uncultured bacterium; s__uncultured bacterium
OTU_1243	2	0	0	0	0	0	0	0	0	1	3	1	0	k__Bacteria; p__Bacteroidetes; c__Bacteroidia; o__Bacteroidales
OTU_2399	2	0	1	0	0	0	0	0	0	0	0	1	4	k__Bacteria; p__Bacteroidetes; c__Bacteroidia; o__Bacteroidales; f__Prevotellaceae
OTU_685	0	0	0	0	0	0	0	0	0	0	0	0	0	k__Bacteria; p__Chloroflexi; c__Gitt-GS-136; o__uncultured bacterium; f__uncultured bacterium; g__uncultured bacterium; s__uncultured bacterium
OTU_3020	0	0	1	0	0	0	0	0	0	0	0	0	0	k__Bacteria; p__Bacteroidetes; c__Bacteroidia; o__Bacteroidales; f__Prevotellaceae; g__Alloprevotella
OTU_475	0	0	0	0	0	0	0	0	0	0	0	0	0	k__Bacteria; p__Firmicutes; c__Clostridia; o__Clostridiales; f__Ruminococcaceae; g__Oscillibacter
OTU_2953	30	0	7	8	4	29	0	0	0	0	2	0	2	k__Bacteria; p__Bacteroidetes; c__Bacteroidia; o__Bacteroidales; f__Muribaculaceae
OTU_1340	0	0	1	0	0	0	0	0	0	0	0	3	11	k__Bacteria; p__Bacteroidetes; c__Bacteroidia; o__Bacteroidales
OTU_2038	0	0	2	0	0	0	0	0	0	0	0	2	0	k__Bacteria; p__Bacteroidetes; c__Bacteroidia; o__Bacteroidales
OTU_2685	0	0	0	0	0	0	0	0	0	0	0	0	0	k__Bacteria; p__Bacteroidetes; c__Bacteroidia; o__Bacteroidales
OTU_2482	0	0	0	0	0	0	0	0	0	0	0	0	0	k__Bacteria; p__Verrucomicrobia; c__Verrucomicrobiae; o__Verrucomicrobiales; f__Akkermansiaceae; g__Akkermansia; s__Akkermansia glycaniphila
OTU_2163	0	0	0	0	0	0	0	0	1	0	0	0	0	k__Bacteria; p__Bacteroidetes; c__Bacteroidia; o__Bacteroidales; f__Muribaculaceae; g__uncultured bacterium; s__uncultured bacterium
OTU_1508	0	0	1	0	0	0	0	0	0	0	0	0	0	k__Bacteria; p__Bacteroidetes; c__Bacteroidia; o__Bacteroidales
OTU_1387	0	0	0	0	0	0	0	0	0	0	0	0	0	k__Bacteria; p__Bacteroidetes; c__Bacteroidia; o__Bacteroidales; f__Muribaculaceae
OTU_2478	0	0	0	0	0	0	0	0	0	0	0	0	0	k__Bacteria; p__Bacteroidetes; c__Bacteroidia; o__Bacteroidales; f__Muribaculaceae; g__uncultured bacterium; s__uncultured bacterium
OTU_2036	0	0	0	0	0	0	0	0	0	0	0	0	0	k__Bacteria
OTU_1110	0	0	0	0	0	0	0	0	0	0	1	0	0	k__Bacteria; p__Bacteroidetes; c__Bacteroidia; o__Bacteroidales; f__Muribaculaceae; g__uncultured bacterium; s__uncultured bacterium
OTU_2288	0	0	0	0	0	0	0	0	0	0	0	2	3	k__Bacteria; p__Bacteroidetes; c__Bacteroidia; o__Bacteroidales; f__Muribaculaceae; g__uncultured bacterium; s__uncultured bacterium
OTU_2021	0	0	0	0	0	0	0	0	0	0	0	0	0	k__Bacteria; p__Bacteroidetes; c__Bacteroidia; o__Bacteroidales
OTU_2002	0	0	0	0	0	0	0	0	0	0	0	0	0	k__Bacteria; p__Bacteroidetes; c__Bacteroidia; o__Bacteroidales; f__Muribaculaceae; g__uncultured bacterium; s__uncultured bacterium
OTU_1775	0	1	3	0	0	0	0	0	0	0	0	0	0	k__Bacteria; p__Bacteroidetes; c__Bacteroidia; o__Bacteroidales
OTU_1557	0	0	0	0	1	0	0	0	0	0	0	0	0	k__Bacteria; p__Bacteroidetes; c__Bacteroidia; o__Bacteroidales; f__Muribaculaceae; g__uncultured bacterium; s__uncultured bacterium
OTU_2489	0	0	0	1	0	0	0	0	0	0	1	0	0	k__Bacteria; p__Firmicutes; c__Clostridia; o__Clostridiales; f__Ruminococcaceae; g__Negativibacillus; s__uncultured bacterium
OTU_2022	0	0	0	0	0	0	0	0	0	0	0	0	1	k__Bacteria; p__Bacteroidetes; c__Bacteroidia; o__Bacteroidales; f__Muribaculaceae; g__uncultured bacterium; s__uncultured bacterium
OTU_2507	0	0	0	0	0	0	0	0	0	0	0	0	1	k__Bacteria; p__Bacteroidetes; c__Bacteroidia; o__Bacteroidales; f__Muribaculaceae; g__uncultured bacterium; s__uncultured bacterium
OTU_2469	0	0	0	0	0	0	0	0	0	0	0	0	0	k__Bacteria; p__Bacteroidetes; c__Bacteroidia; o__Bacteroidales; f__Prevotellaceae; g__Alloprevotella
OTU_2312	0	0	4	0	0	0	0	0	0	0	0	0	0	k__Bacteria
OTU_2663	0	0	0	0	0	1	0	0	0	0	0	0	0	k__Bacteria; p__Bacteroidetes; c__Bacteroidia; o__Bacteroidales; f__Rikenellaceae
OTU_2106	1	0	1	0	0	0	0	0	5	0	0	0	0	k__Bacteria; p__Bacteroidetes; c__Bacteroidia; o__Bacteroidales; f__Muribaculaceae; g__uncultured bacterium; s__uncultured bacterium
OTU_2081	2	0	0	0	0	0	0	0	0	0	0	3	3	k__Bacteria; p__Bacteroidetes; c__Bacteroidia; o__Bacteroidales; f__Muribaculaceae; g__uncultured bacterium; s__uncultured bacterium
OTU_1295	0	0	0	0	0	0	0	0	0	0	0	0	0	k__Bacteria; p__Actinobacteria; c__Actinobacteria; o__Actinomycetales; f__Actinomycetaceae; g__Actinotignum; s__Actinotignum urinale DSM 15805
OTU_2311	11	0	2	0	2	0	0	0	0	0	3	5	2	k__Bacteria; p__Bacteroidetes; c__Bacteroidia; o__Bacteroidales
OTU_899	0	0	1	1	1	0	0	0	1	1	0	1	3	k__Bacteria; p__Actinobacteria; c__Actinobacteria; o__Corynebacteriales; f__Corynebacteriaceae; g__Corynebacterium 1
OTU_1296	0	0	0	0	0	0	0	0	0	1	0	2	10	k__Bacteria; p__Bacteroidetes; c__Bacteroidia; o__Bacteroidales
OTU_1199	1	0	0	0	0	0	0	0	0	0	0	0	0	k__Bacteria; p__Actinobacteria; c__Actinobacteria; o__Corynebacteriales; f__Corynebacteriaceae; g__Lawsonella
OTU_1414	0	0	0	0	0	0	0	0	0	0	0	0	0	k__Bacteria; p__Bacteroidetes; c__Bacteroidia; o__Bacteroidales; f__Muribaculaceae; g__uncultured bacterium; s__uncultured bacterium
OTU_2290	0	0	0	0	0	0	0	0	0	0	0	0	0	k__Bacteria; p__Bacteroidetes; c__Bacteroidia; o__Bacteroidales; f__Muribaculaceae; g__uncultured bacterium; s__uncultured bacterium
OTU_1982	0	0	0	0	0	0	1	0	0	0	0	0	0	k__Bacteria; p__Bacteroidetes; c__Bacteroidia; o__Bacteroidales; f__Marinifilaceae; g__Butyricimonas
OTU_1690	10	0	0	0	1	0	0	0	0	0	0	0	0	k__Bacteria; p__Bacteroidetes; c__Bacteroidia; o__Bacteroidales; f__Muribaculaceae; g__uncultured bacterium; s__uncultured bacterium
OTU_1527	1	0	1	0	0	0	0	0	0	0	0	0	0	k__Bacteria
OTU_1405	0	0	0	0	0	0	0	0	0	0	0	0	0	k__Bacteria; p__Bacteroidetes; c__Bacteroidia; o__Bacteroidales; f__Muribaculaceae; g__mouse gut metagenome; s__mouse gut metagenome
OTU_1969	0	0	0	0	0	0	0	0	0	0	0	0	0	k__Bacteria; p__Bacteroidetes; c__Bacteroidia; o__Bacteroidales
OTU_538	0	0	0	0	0	0	0	0	0	0	0	0	0	k__Bacteria; p__Firmicutes; c__Clostridia; o__Clostridiales; f__Lachnospiraceae; g__Lachnospiraceae NK4A136 group; s__uncultured bacterium
OTU_790	0	0	0	0	0	0	0	0	0	0	0	0	0	k__Bacteria; p__Firmicutes; c__Clostridia; o__Clostridiales; f__Clostridiaceae 1; g__Clostridium sensu stricto 1; s__Clostridium butyricum
OTU_2501	0	3	0	0	0	0	0	0	0	0	0	0	0	k__Bacteria; p__Firmicutes; c__Clostridia; o__Clostridiales; f__Ruminococcaceae
OTU_901	1	0	0	0	0	0	0	0	0	0	0	0	0	k__Bacteria; p__Bacteroidetes; c__Bacteroidia; o__Bacteroidales; f__Barnesiellaceae; g__Barnesiella
OTU_2495	0	0	0	0	0	0	0	0	0	0	0	0	0	k__Bacteria; p__Bacteroidetes; c__Bacteroidia; o__Bacteroidales; f__Muribaculaceae; g__uncultured bacterium; s__uncultured bacterium
OTU_1875	0	0	0	0	0	0	0	0	0	0	0	0	0	k__Bacteria; p__Bacteroidetes; c__Bacteroidia; o__Bacteroidales; f__Muribaculaceae; g__uncultured bacterium; s__uncultured bacterium
OTU_1973	0	0	0	0	0	0	0	0	0	0	0	0	0	k__Bacteria; p__Bacteroidetes; c__Bacteroidia; o__Bacteroidales; f__Muribaculaceae
OTU_1222	0	0	0	0	0	0	0	0	0	0	1	0	0	k__Bacteria; p__Bacteroidetes; c__Bacteroidia; o__Bacteroidales
OTU_2823	0	0	0	0	0	0	0	0	0	0	0	0	0	k__Bacteria; p__Bacteroidetes; c__Bacteroidia; o__Bacteroidales; f__Muribaculaceae; g__uncultured bacterium; s__uncultured bacterium
OTU_2100	8	0	0	0	0	0	0	0	0	0	0	0	0	k__Bacteria; p__Bacteroidetes; c__Bacteroidia; o__Bacteroidales; f__Muribaculaceae; g__uncultured bacterium; s__uncultured bacterium
OTU_1808	0	0	0	1	0	0	0	0	0	0	0	2	1	k__Bacteria; p__Bacteroidetes; c__Bacteroidia; o__Bacteroidales
OTU_2272	0	0	1	0	1	0	0	0	1	0	0	0	0	k__Bacteria; p__Bacteroidetes; c__Bacteroidia; o__Bacteroidales; f__Muribaculaceae; g__uncultured bacterium; s__uncultured bacterium
OTU_2465	0	0	3	0	2	0	0	0	0	4	4	8	21	k__Bacteria; p__Bacteroidetes; c__Bacteroidia; o__Bacteroidales; f__Muribaculaceae; g__uncultured bacterium; s__uncultured bacterium
OTU_351	0	0	0	0	0	0	0	2	0	0	1	0	0	k__Bacteria; p__Firmicutes; c__Clostridia; o__Clostridiales; f__Lachnospiraceae; g__uncultured
OTU_591	0	0	0	0	0	0	9	0	0	0	0	0	0	k__Bacteria; p__Actinobacteria; c__Coriobacteriia; o__Coriobacteriales; f__Eggerthellaceae; g__Eggerthella; s__uncultured bacterium
OTU_2309	0	0	0	0	0	0	0	0	0	2	0	0	0	k__Bacteria
OTU_2364	0	0	0	0	0	0	0	0	0	0	1	0	0	k__Bacteria; p__Actinobacteria; c__Actinobacteria; o__Micromonosporales; f__Micromonosporaceae; g__Dactylosporangium; s__uncultured bacterium
OTU_2767	0	0	1	0	0	0	0	1	1	0	0	0	1	k__Bacteria; p__Verrucomicrobia; c__Verrucomicrobiae; o__Chthoniobacterales; f__Chthoniobacteraceae; g__Candidatus Udaeobacter
OTU_2731	0	2	0	0	0	0	0	0	0	0	0	0	0	k__Bacteria; p__Bacteroidetes; c__Bacteroidia; o__Bacteroidales; f__Muribaculaceae; g__uncultured bacterium; s__uncultured bacterium
OTU_836	0	0	0	0	0	0	0	0	0	0	0	0	0	k__Bacteria; p__Proteobacteria; c__Gammaproteobacteria; o__Betaproteobacteriales; f__Rhodocyclaceae; g__Azoarcus; s__uncultured bacterium
OTU_2407	0	0	0	0	0	0	0	0	0	0	0	0	0	k__Bacteria; p__Bacteroidetes; c__Bacteroidia; o__Bacteroidales; f__Muribaculaceae; g__uncultured bacterium; s__uncultured bacterium
OTU_1643	0	0	1	0	1	0	0	0	0	0	0	2	1	k__Bacteria; p__Bacteroidetes; c__Bacteroidia; o__Bacteroidales; f__Muribaculaceae; g__uncultured bacterium; s__uncultured bacterium
OTU_240	0	0	0	0	0	0	0	0	0	0	0	0	0	k__Bacteria; p__Chloroflexi; c__KD4-96; o__uncultured Chloroflexi bacterium; f__uncultured Chloroflexi bacterium; g__uncultured Chloroflexi bacterium; s__uncultured Chloroflexi bacterium
OTU_307	0	0	0	0	0	0	0	0	0	0	0	0	0	k__Bacteria
OTU_311	0	0	0	0	0	0	0	0	0	0	0	0	0	k__Bacteria; p__Proteobacteria; c__Alphaproteobacteria; o__Dongiales; f__Dongiaceae; g__Dongia; s__uncultured bacterium
OTU_258	0	0	0	0	0	0	0	0	0	0	0	0	0	k__Bacteria; p__Gemmatimonadetes; c__Gemmatimonadetes; o__Gemmatimonadales; f__Gemmatimonadaceae; g__uncultured; s__uncultured Gemmatimonas sp.
OTU_309	0	0	0	0	0	0	0	0	0	0	0	0	0	k__Bacteria; p__Firmicutes; c__Clostridia; o__Clostridiales; f__Lachnospiraceae
OTU_190	0	0	0	0	0	0	0	0	0	0	0	0	0	k__Bacteria; p__Proteobacteria; c__Alphaproteobacteria; o__Acetobacterales; f__Acetobacteraceae; g__Roseomonas; s__bacterium PT12
OTU_142	0	0	0	0	0	0	0	0	0	0	0	0	0	k__Bacteria; p__Bacteroidetes; c__Bacteroidia; o__Flavobacteriales; f__Flavobacteriaceae; g__Flavobacterium
OTU_358	0	0	0	0	0	0	0	0	0	0	0	0	0	k__Bacteria; p__Proteobacteria; c__Deltaproteobacteria; o__Bdellovibrionales; f__Bdellovibrionaceae; g__Bdellovibrio; s__metagenome
OTU_283	0	0	0	0	0	0	0	0	0	0	0	0	0	k__Bacteria; p__Gemmatimonadetes; c__Gemmatimonadetes; o__Gemmatimonadales; f__Gemmatimonadaceae; g__Gemmatimonas
OTU_134	0	0	0	0	0	0	0	0	0	0	0	0	0	k__Bacteria; p__Firmicutes; c__Bacilli; o__Lactobacillales; f__Leuconostocaceae; g__Weissella
OTU_300	0	0	0	0	0	0	0	0	0	0	0	0	0	k__Bacteria; p__Proteobacteria; c__Gammaproteobacteria
OTU_674	0	0	0	0	0	0	0	0	0	0	0	0	0	k__Bacteria; p__Bacteroidetes; c__Bacteroidia; o__Bacteroidales; f__Muribaculaceae; g__uncultured bacterium; s__uncultured bacterium
OTU_298	0	0	0	0	0	0	1	3	1	0	0	0	0	k__Bacteria; p__Firmicutes; c__Clostridia; o__Clostridiales; f__Ruminococcaceae; g__Ruminococcaceae UCG-003; s__uncultured organism
OTU_305	0	0	0	0	0	0	0	0	0	0	0	0	0	k__Bacteria; p__Actinobacteria; c__Coriobacteriia; o__Coriobacteriales; f__Atopobiaceae
OTU_290	0	0	0	0	0	0	0	0	0	0	0	0	0	k__Bacteria; p__Bacteroidetes; c__Bacteroidia; o__Bacteroidales; f__Prevotellaceae
OTU_323	0	0	0	0	0	0	0	13	0	0	1	0	0	k__Bacteria; p__Firmicutes; c__Clostridia; o__Clostridiales; f__Lachnospiraceae
OTU_361	0	0	0	0	0	0	0	0	0	0	0	0	0	k__Bacteria; p__Firmicutes; c__Clostridia; o__Clostridiales; f__Clostridiaceae 1; g__Clostridium sensu stricto 1; s__Clostridium sp. ND2
OTU_199	0	0	0	0	1	0	0	1	5	23	22	6	30	k__Bacteria; p__Bacteroidetes; c__Bacteroidia; o__Bacteroidales; f__Rikenellaceae; g__Alistipes; s__gut metagenome
OTU_488	0	0	0	0	0	0	0	0	0	0	0	0	0	k__Bacteria; p__Proteobacteria; c__Alphaproteobacteria; o__Sphingomonadales; f__Sphingomonadaceae
OTU_262	0	0	0	0	0	0	0	0	0	0	0	0	0	k__Bacteria; p__Proteobacteria; c__Alphaproteobacteria
OTU_286	0	0	0	0	0	0	27	0	0	0	0	0	0	k__Bacteria; p__Bacteroidetes; c__Bacteroidia; o__Bacteroidales; f__Muribaculaceae; g__uncultured bacterium; s__uncultured bacterium
OTU_834	0	0	0	0	0	0	0	0	0	0	0	0	0	k__Bacteria; p__Firmicutes; c__Clostridia; o__Clostridiales; f__Ruminococcaceae
OTU_1017	0	0	0	0	0	0	0	0	0	0	0	0	0	k__Bacteria; p__Bacteroidetes; c__Bacteroidia; o__Bacteroidales; f__Muribaculaceae; g__uncultured bacterium; s__uncultured bacterium
OTU_230	0	0	0	0	0	0	0	0	0	0	0	0	0	k__Bacteria; p__Bacteroidetes; c__Bacteroidia; o__Bacteroidales; f__Bacteroidaceae; g__Bacteroides; s__gut metagenome
OTU_827	0	0	1	0	0	0	0	0	0	0	0	0	0	k__Bacteria; p__Proteobacteria; c__Gammaproteobacteria; o__Betaproteobacteriales; f__Burkholderiaceae; g__Hydrogenophaga; s__uncultured bacterium
OTU_810	0	0	0	0	0	0	0	0	0	0	0	0	0	k__Bacteria; p__Actinobacteria; c__Coriobacteriia; o__Coriobacteriales; f__Eggerthellaceae; g__Gordonibacter; s__uncultured bacterium
OTU_2134	0	0	0	0	0	2	0	0	0	0	0	0	0	k__Bacteria; p__Firmicutes; c__Clostridia; o__Clostridiales; f__Lachnospiraceae; g__Epulopiscium; s__uncultured organism
OTU_393	0	0	0	0	0	0	0	0	0	0	0	0	11	k__Bacteria; p__Proteobacteria; c__Gammaproteobacteria; o__Xanthomonadales; f__Xanthomonadaceae; g__Lysobacter
OTU_869	0	0	0	0	0	0	0	0	0	0	0	0	0	k__Bacteria; p__Bacteroidetes; c__Bacteroidia; o__Bacteroidales; f__Porphyromonadaceae; g__Porphyromonas; s__Porphyromonas sp. HMSC077F02
OTU_1175	0	0	0	0	0	0	0	0	0	0	0	0	0	k__Bacteria; p__Firmicutes; c__Negativicutes; o__Selenomonadales; f__Veillonellaceae; g__Dialister; s__unidentified
OTU_1456	0	2	0	0	0	2	0	0	0	1	0	0	1	k__Bacteria; p__Firmicutes; c__Clostridia; o__Clostridiales; f__Ruminococcaceae; g__Ruminiclostridium; s__uncultured bacterium
OTU_1749	0	0	0	0	0	0	0	0	0	0	0	0	0	k__Bacteria; p__Actinobacteria; c__Thermoleophilia; o__Gaiellales; f__Gaiellaceae; g__Gaiella
OTU_2483	0	0	0	0	0	0	0	0	0	0	0	0	0	k__Bacteria; p__Proteobacteria; c__Gammaproteobacteria; o__Betaproteobacteriales; f__Burkholderiaceae; g__Sutterella; s__uncultured bacterium
OTU_564	0	0	0	0	0	0	0	0	0	0	0	0	0	k__Bacteria; p__Chloroflexi; c__Ktedonobacteria; o__Ktedonobacterales; f__Ktedonobacteraceae; g__uncultured
OTU_733	0	0	0	0	0	0	0	0	0	0	0	0	0	k__Bacteria; p__Proteobacteria; c__Deltaproteobacteria; o__Bdellovibrionales; f__Bacteriovoracaceae; g__Peredibacter; s__metagenome
OTU_387	0	0	0	0	0	0	16	0	0	0	0	0	0	k__Bacteria; p__Bacteroidetes; c__Bacteroidia; o__Chitinophagales; f__Chitinophagaceae; g__uncultured; s__uncultured Bacteroidetes bacterium
OTU_378	0	0	0	0	0	0	0	0	0	0	0	0	0	k__Bacteria; p__Acidobacteria; c__Subgroup 6
OTU_353	0	0	0	0	0	0	0	0	0	0	0	0	0	k__Bacteria; p__Rokubacteria; c__NC10; o__Methylomirabilales; f__Methylomirabilaceae; g__Sh765B-TzT-35; s__uncultured bacterium
OTU_333	0	0	0	0	0	0	0	0	0	0	0	0	0	k__Bacteria; p__Bacteroidetes; c__Bacteroidia; o__Flavobacteriales; f__Flavobacteriaceae; g__Flavobacterium; s__uncultured Flavobacterium sp.
OTU_715	0	0	0	0	0	0	0	0	0	0	0	0	0	k__Bacteria; p__Proteobacteria; c__Gammaproteobacteria; o__Legionellales; f__Legionellaceae; g__Legionella
OTU_550	0	0	0	0	0	0	0	0	0	0	0	0	0	k__Bacteria; p__Bacteroidetes; c__Bacteroidia; o__Bacteroidales; f__Muribaculaceae
OTU_781	0	0	0	0	0	0	0	0	0	0	0	0	0	k__Bacteria; p__Firmicutes; c__Clostridia; o__Clostridiales; f__Lachnospiraceae
OTU_437	0	0	0	0	0	0	0	0	0	0	0	0	0	k__Bacteria; p__Acidobacteria; c__Subgroup 6
OTU_546	0	0	0	0	0	0	0	0	0	0	0	0	0	k__Bacteria; p__Bacteroidetes; c__Bacteroidia; o__Bacteroidales; f__Prevotellaceae; g__Prevotella 7; s__uncultured bacterium
OTU_654	0	0	0	0	0	0	0	0	0	0	0	0	0	k__Bacteria; p__Firmicutes; c__Negativicutes; o__Selenomonadales; f__Veillonellaceae; g__Veillonella
OTU_641	0	0	0	0	0	0	0	0	0	0	0	0	0	k__Bacteria; p__Chloroflexi; c__Anaerolineae; o__SBR1031; f__A4b; g__uncultured bacterium; s__uncultured bacterium
OTU_830	0	0	0	0	0	0	0	0	0	0	0	0	0	k__Bacteria; p__Proteobacteria; c__Gammaproteobacteria; o__Xanthomonadales; f__Rhodanobacteraceae; g__Chujaibacter; s__uncultured bacterium
OTU_926	0	0	0	0	0	0	0	0	0	0	0	0	0	k__Bacteria; p__Bacteroidetes; c__Bacteroidia; o__Bacteroidales; f__Bacteroidaceae; g__Bacteroides
OTU_892	0	0	0	0	0	0	4	0	0	0	0	0	0	k__Bacteria; p__Bacteroidetes; c__Bacteroidia; o__Bacteroidales; f__Muribaculaceae; g__uncultured bacterium; s__uncultured bacterium
OTU_652	0	0	0	0	0	0	0	2	0	0	0	0	0	k__Bacteria; p__Bacteroidetes; c__Bacteroidia; o__Bacteroidales; f__Porphyromonadaceae; g__Porphyromonas; s__uncultured bacterium
OTU_772	0	0	0	0	0	0	0	0	0	0	0	0	0	k__Bacteria; p__Bacteroidetes; c__Bacteroidia; o__Flavobacteriales; f__Crocinitomicaceae; g__Fluviicola; s__uncultured bacterium
OTU_1077	0	0	0	0	0	0	0	0	0	0	0	0	0	k__Bacteria; p__Firmicutes; c__Clostridia; o__Clostridiales; f__Ruminococcaceae; g__Ruminococcaceae UCG-014; s__uncultured bacterium
OTU_624	0	1	0	0	0	0	0	0	0	2	0	0	0	k__Bacteria; p__Cyanobacteria; c__Melainabacteria; o__Gastranaerophilales; f__uncultured bacterium; g__uncultured bacterium; s__uncultured bacterium
OTU_875	0	0	0	0	0	0	0	0	0	0	0	0	0	k__Bacteria; p__Firmicutes; c__Clostridia; o__Clostridiales; f__Ruminococcaceae
OTU_905	0	0	0	0	0	0	0	0	0	0	0	0	0	k__Bacteria; p__Firmicutes; c__Negativicutes; o__Selenomonadales; f__Veillonellaceae; g__Allisonella; s__uncultured bacterium
OTU_782	0	0	0	0	0	0	0	0	0	0	0	0	0	k__Bacteria; p__Firmicutes; c__Clostridia; o__Clostridiales; f__Ruminococcaceae; g__Ruminococcaceae UCG-005
OTU_1170	0	0	0	0	0	0	0	2	0	0	0	0	0	k__Bacteria; p__Tenericutes; c__Mollicutes; o__Mollicutes RF39
OTU_2087	0	0	0	0	0	0	0	0	0	0	0	0	0	k__Bacteria; p__Actinobacteria; c__Coriobacteriia; o__Coriobacteriales; f__Eggerthellaceae; g__Enterorhabdus; s__mouse gut metagenome
OTU_978	0	8	0	0	0	1	0	0	0	0	0	0	0	k__Bacteria; p__Firmicutes; c__Clostridia; o__Clostridiales; f__Ruminococcaceae
OTU_974	0	0	0	0	0	0	0	0	0	0	0	1	0	k__Bacteria; p__Proteobacteria; c__Deltaproteobacteria; o__Desulfovibrionales; f__Desulfovibrionaceae; g__Desulfovibrio
OTU_858	1	0	0	0	0	0	0	2	12	0	0	0	0	k__Bacteria; p__Actinobacteria; c__Actinobacteria; o__Corynebacteriales; f__Corynebacteriaceae; g__Corynebacterium 1
OTU_2560	0	0	0	0	0	1	0	0	0	0	0	0	0	k__Bacteria; p__Actinobacteria; c__Thermoleophilia; o__Gaiellales; f__Gaiellaceae; g__Gaiella; s__metagenome
OTU_2382	0	0	0	0	0	0	0	0	0	0	0	0	0	k__Bacteria; p__Actinobacteria; c__Actinobacteria; o__Corynebacteriales; f__Corynebacteriaceae; g__Corynebacterium; s__Corynebacterium atypicum
OTU_2633	0	1	0	0	0	0	0	0	0	0	0	0	0	k__Bacteria; p__Firmicutes; c__Clostridia; o__Clostridiales; f__Lachnospiraceae; g__ASF356; s__Clostridium sp. ASF356
OTU_189	1	1	1	0	1	0	1	0	1	0	0	0	1	k__Bacteria; p__Firmicutes; c__Clostridia; o__Clostridiales; f__Lachnospiraceae; g__[Eubacterium] fissicatena group; s__uncultured bacterium
OTU_1428	0	0	3	0	5	0	2	0	0	0	1	0	0	k__Bacteria; p__Bacteroidetes; c__Bacteroidia; o__Bacteroidales; f__Muribaculaceae; g__uncultured bacterium; s__uncultured bacterium
OTU_219	0	0	0	2	0	0	0	1	0	0	0	0	0	k__Bacteria; p__Cyanobacteria; c__Melainabacteria; o__Gastranaerophilales; f__uncultured bacterium; g__uncultured bacterium; s__uncultured bacterium
OTU_1368	0	0	0	0	0	0	0	0	0	0	0	0	0	k__Bacteria; p__Actinobacteria; c__Thermoleophilia; o__Solirubrobacterales; f__Solirubrobacteraceae; g__uncultured; s__uncultured bacterium
OTU_828	0	0	0	0	0	0	1	0	0	0	0	0	0	k__Bacteria; p__Actinobacteria; c__Actinobacteria; o__Corynebacteriales; f__Mycobacteriaceae; g__Mycobacterium
OTU_737	0	0	0	0	0	0	0	0	0	0	0	0	0	k__Bacteria; p__Chloroflexi; c__Anaerolineae; o__SBR1031; f__A4b
OTU_921	0	0	0	0	0	0	0	0	0	0	0	0	0	k__Bacteria; p__Proteobacteria; c__Alphaproteobacteria; o__Rhizobiales; f__Beijerinckiaceae; g__Methylobacterium; s__Methylobacterium platani
OTU_884	0	0	0	0	0	0	0	0	0	0	0	0	0	k__Bacteria; p__Actinobacteria; c__Acidimicrobiia; o__uncultured
OTU_778	0	0	0	0	0	0	0	0	0	0	0	0	0	k__Bacteria; p__Bacteroidetes; c__Bacteroidia; o__Bacteroidales; f__Muribaculaceae; g__uncultured bacterium; s__uncultured bacterium
OTU_1037	0	0	0	0	0	0	0	0	0	0	0	0	0	k__Bacteria; p__Firmicutes; c__Clostridia; o__Clostridiales; f__Ruminococcaceae; g__Ruminococcaceae UCG-010; s__uncultured bacterium
OTU_1466	0	0	0	0	0	0	0	0	0	0	0	0	0	k__Bacteria; p__Bacteroidetes; c__Bacteroidia; o__Bacteroidales
OTU_1095	0	0	0	0	0	0	0	0	0	0	0	0	0	k__Bacteria; p__Proteobacteria; c__Gammaproteobacteria; o__Betaproteobacteriales; f__Neisseriaceae; g__uncultured; s__uncultured bacterium
OTU_1005	0	0	0	0	0	0	0	0	0	0	0	0	0	k__Bacteria; p__Bacteroidetes; c__Bacteroidia; o__Sphingobacteriales; f__Sphingobacteriaceae; g__Pedobacter; s__uncultured bacterium
OTU_887	0	0	0	0	0	0	0	0	0	0	0	0	0	k__Bacteria; p__Chloroflexi; c__Ktedonobacteria; o__Ktedonobacterales; f__JG30-KF-AS9; g__uncultured bacterium; s__uncultured bacterium
OTU_1006	0	0	0	0	0	0	0	0	0	0	0	0	0	k__Bacteria; p__Proteobacteria; c__Alphaproteobacteria; o__Rhizobiales; f__Xanthobacteraceae; g__Rhodoplanes; s__uncultured bacterium
OTU_874	0	0	0	0	0	0	3	0	0	0	0	1	0	k__Bacteria; p__Bacteroidetes; c__Bacteroidia; o__Bacteroidales; f__Bacteroidaceae; g__Bacteroides; s__Bacteroides sp. HPS0048
OTU_2567	0	0	0	0	0	0	0	2	0	0	0	0	0	k__Bacteria; p__Firmicutes; c__Clostridia; o__Clostridiales; f__Lachnospiraceae
OTU_920	0	0	0	0	0	0	0	0	0	0	0	0	0	k__Bacteria; p__Acidobacteria; c__Acidobacteriia; o__Solibacterales; f__Solibacteraceae (Subgroup 3); g__Bryobacter; s__Acidobacteriaceae bacterium KBS 96
OTU_1427	0	0	0	0	0	0	0	0	0	0	0	0	0	k__Bacteria; p__Firmicutes; c__Clostridia; o__Clostridiales; f__Family XIII; g__Anaerovorax; s__uncultured rumen bacterium
OTU_1947	0	0	0	0	0	0	0	0	0	0	1	0	0	k__Bacteria; p__Firmicutes; c__Clostridia; o__Clostridiales
OTU_791	0	0	0	0	0	5	0	1	0	0	0	1	0	k__Bacteria; p__Tenericutes; c__Mollicutes; o__Anaeroplasmatales; f__Anaeroplasmataceae; g__Anaeroplasma; s__uncultured bacterium
OTU_980	0	0	0	0	0	0	0	0	0	0	0	0	0	k__Bacteria; p__Actinobacteria; c__Acidimicrobiia; o__Microtrichales; f__uncultured
OTU_1743	0	0	0	0	0	4	0	0	0	0	0	0	0	k__Bacteria; p__Firmicutes; c__Clostridia; o__Clostridiales; f__Lachnospiraceae
OTU_1153	0	0	0	0	0	0	0	0	0	0	0	0	0	k__Bacteria; p__Firmicutes; c__Clostridia; o__Clostridiales; f__Family XIII; g__Anaerovorax
OTU_849	0	0	0	0	0	0	0	0	0	1	0	0	0	k__Bacteria; p__Firmicutes; c__Clostridia; o__Clostridiales; f__Lachnospiraceae; g__[Eubacterium] xylanophilum group; s__uncultured bacterium
OTU_943	0	0	0	0	0	0	0	0	0	0	0	0	0	k__Bacteria
OTU_2321	0	0	0	0	0	0	0	0	0	0	0	0	0	k__Bacteria; p__Firmicutes; c__Clostridia; o__Clostridiales; f__Lachnospiraceae; g__Lachnospiraceae NK4A136 group; s__uncultured bacterium
OTU_1410	0	0	0	0	0	0	0	0	0	0	0	0	0	k__Bacteria; p__Proteobacteria; c__Deltaproteobacteria; o__Desulfovibrionales; f__Desulfovibrionaceae; g__uncultured; s__uncultured bacterium
OTU_940	0	0	0	0	0	0	0	0	0	0	0	0	0	k__Bacteria; p__Proteobacteria; c__Deltaproteobacteria; o__Bdellovibrionales; f__Bdellovibrionaceae; g__Bdellovibrio; s__metagenome
OTU_832	0	1	0	0	1	1	0	0	2	0	0	0	0	k__Bacteria; p__Firmicutes; c__Clostridia; o__Clostridiales; f__Clostridiales vadinBB60 group; g__uncultured bacterium; s__uncultured bacterium
OTU_941	0	0	0	0	0	0	0	0	0	0	0	0	0	k__Bacteria; p__Actinobacteria; c__Acidimicrobiia; o__Microtrichales; f__Iamiaceae; g__Iamia
OTU_1004	0	0	0	0	0	0	0	0	0	0	0	0	0	k__Bacteria; p__Firmicutes; c__Clostridia; o__Clostridiales; f__Ruminococcaceae; g__[Eubacterium] coprostanoligenes group; s__uncultured Clostridiales bacterium
OTU_1127	0	0	0	0	0	0	0	0	0	0	0	0	0	k__Bacteria; p__Proteobacteria; c__Deltaproteobacteria; o__Myxococcales
OTU_1308	0	0	0	0	0	0	0	0	0	0	0	0	0	k__Bacteria; p__Acidobacteria; c__Subgroup 25; o__uncultured soil bacterium; f__uncultured soil bacterium; g__uncultured soil bacterium; s__uncultured soil bacterium
OTU_2503	0	0	0	0	0	0	0	0	0	0	0	0	0	k__Bacteria; p__Chloroflexi; c__KD4-96
OTU_1190	0	0	0	0	0	0	0	0	0	0	0	0	0	k__Bacteria; p__Firmicutes; c__Clostridia; o__Clostridiales; f__Lachnospiraceae; g__Lachnoanaerobaculum; s__uncultured bacterium
OTU_1087	0	0	0	0	0	0	0	0	0	0	0	0	0	k__Bacteria; p__Firmicutes; c__Clostridia; o__Clostridiales; f__Lachnospiraceae; g__Lachnospiraceae NK4A136 group; s__Lachnospiraceae bacterium A4
OTU_2374	0	0	0	0	0	1	0	0	0	0	0	0	0	k__Bacteria; p__Firmicutes; c__Clostridia; o__Clostridiales; f__Lachnospiraceae
OTU_1094	0	0	0	0	0	0	0	0	0	0	0	0	0	k__Bacteria; p__Acidobacteria; c__Subgroup 6
OTU_885	0	0	0	0	0	0	0	0	0	0	0	0	0	k__Bacteria; p__Proteobacteria; c__Alphaproteobacteria; o__Caulobacterales; f__Caulobacteraceae; g__uncultured; s__metagenome
OTU_1060	0	0	0	0	0	0	0	0	0	0	0	0	0	k__Bacteria; p__Bacteroidetes; c__Bacteroidia; o__Bacteroidales; f__Prevotellaceae
OTU_1075	0	1	0	0	1	0	0	0	0	0	0	0	0	k__Bacteria; p__Proteobacteria; c__Alphaproteobacteria; o__Rhizobiales; f__Hyphomicrobiaceae; g__Hyphomicrobium; s__uncultured Hyphomicrobiaceae bacterium
OTU_764	0	0	0	0	0	0	0	0	0	0	0	0	0	k__Bacteria; p__Bacteroidetes; c__Bacteroidia; o__Bacteroidales; f__Rikenellaceae; g__Rikenellaceae RC9 gut group; s__uncultured bacterium
OTU_1059	0	0	0	0	0	0	0	0	0	0	0	0	1	k__Bacteria; p__Actinobacteria; c__Actinobacteria; o__Propionibacteriales; f__Nocardioidaceae; g__Nocardioides; s__Nocardioides sp.
OTU_918	0	0	0	0	0	0	0	0	1	0	0	0	0	k__Bacteria; p__Actinobacteria; c__Actinobacteria; o__Kineosporiales; f__Kineosporiaceae; g__Kineococcus
OTU_1129	0	0	0	0	0	0	0	0	0	0	0	0	0	k__Bacteria; p__Firmicutes; c__Clostridia; o__Clostridiales; f__Ruminococcaceae; g__Ruminococcaceae UCG-010
OTU_961	0	0	0	0	0	0	0	0	0	0	0	0	0	k__Bacteria; p__Actinobacteria; c__Actinobacteria; o__Corynebacteriales; f__Nocardiaceae
OTU_452	0	0	0	0	0	0	9	0	0	0	0	0	0	k__Bacteria; p__Firmicutes; c__Clostridia; o__Clostridiales; f__Ruminococcaceae; g__Ruminococcus 1
OTU_913	0	0	0	0	0	0	0	0	0	0	0	0	0	k__Bacteria; p__Proteobacteria; c__Alphaproteobacteria; o__Caulobacterales; f__Caulobacteraceae; g__uncultured
OTU_1373	0	0	0	0	0	0	0	0	0	0	0	0	0	k__Bacteria; p__Proteobacteria; c__Deltaproteobacteria; o__Desulfovibrionales; f__Desulfovibrionaceae; g__Desulfovibrio
OTU_1173	0	0	0	0	0	0	0	0	0	0	0	0	0	k__Bacteria; p__Bacteroidetes; c__Bacteroidia; o__Flavobacteriales; f__NS9 marine group; g__metagenome; s__metagenome
OTU_1157	0	0	0	0	0	0	0	0	0	0	0	0	0	k__Bacteria; p__Bacteroidetes; c__Bacteroidia; o__Cytophagales; f__Microscillaceae; g__Flexibacter; s__uncultured bacterium
OTU_1130	0	0	0	0	0	0	0	1	0	0	0	1	0	k__Bacteria; p__Acidobacteria; c__Blastocatellia (Subgroup 4); o__Blastocatellales; f__Blastocatellaceae
OTU_648	0	0	0	2	0	0	1	6	0	0	0	0	0	k__Bacteria; p__Actinobacteria; c__Actinobacteria; o__Micrococcales; f__Micrococcaceae; g__Rothia
OTU_986	0	0	0	0	0	0	0	0	0	0	0	0	0	k__Bacteria; p__Actinobacteria; c__Thermoleophilia; o__Gaiellales; f__uncultured; g__uncultured bacterium; s__uncultured bacterium
OTU_1001	0	0	0	0	0	0	0	0	0	0	0	0	0	k__Bacteria; p__Firmicutes; c__Clostridia; o__Clostridiales; f__Ruminococcaceae
OTU_490	0	0	0	0	0	0	19	0	0	0	0	0	0	k__Bacteria; p__Proteobacteria; c__Alphaproteobacteria; o__Rhodospirillales; f__uncultured; g__gut metagenome; s__gut metagenome
OTU_949	0	0	0	0	0	0	0	0	0	0	0	0	0	k__Bacteria; p__Patescibacteria; c__Saccharimonadia; o__Saccharimonadales
OTU_2181	0	0	0	0	0	0	0	0	0	0	0	0	0	k__Bacteria; p__Acidobacteria; c__Acidobacteriia; o__Subgroup 13
OTU_2020	0	0	0	0	0	0	0	0	0	0	0	0	0	k__Bacteria; p__Bacteroidetes; c__Bacteroidia; o__Flavobacteriales; f__Flavobacteriaceae; g__Flavobacterium
OTU_2800	0	0	0	0	0	0	0	0	0	0	0	0	0	k__Bacteria
OTU_1233	0	0	0	0	0	0	0	0	0	0	0	0	0	k__Bacteria; p__Actinobacteria; c__Actinobacteria; o__Corynebacteriales; f__Corynebacteriaceae; g__Corynebacterium 1
OTU_870	0	0	0	0	0	0	0	0	0	0	0	0	0	k__Bacteria; p__Proteobacteria; c__Alphaproteobacteria; o__Sphingomonadales; f__Sphingomonadaceae; g__Sphingobium
OTU_1089	0	0	0	0	0	0	0	0	1	0	0	0	0	k__Bacteria; p__Bacteroidetes; c__Bacteroidia; o__Bacteroidales; f__Prevotellaceae; g__Prevotella 7; s__uncultured organism
OTU_1476	0	0	0	0	0	0	0	0	0	0	0	0	0	k__Bacteria; p__Proteobacteria; c__Deltaproteobacteria; o__Myxococcales; f__Polyangiaceae; g__Pajaroellobacter; s__metagenome
OTU_768	0	0	0	1	0	1	0	1	0	0	0	1	0	k__Bacteria; p__Actinobacteria; c__Actinobacteria; o__Corynebacteriales; f__Corynebacteriaceae
OTU_1090	0	0	0	0	0	0	0	0	0	0	0	0	0	k__Bacteria; p__Bacteroidetes; c__Bacteroidia; o__Bacteroidales; f__Prevotellaceae; g__Prevotella 9; s__uncultured bacterium
OTU_970	0	0	0	0	0	0	0	0	0	0	0	0	0	k__Bacteria; p__Actinobacteria; c__Acidimicrobiia; o__IMCC26256
OTU_1415	0	0	0	0	0	0	0	0	0	0	0	0	0	k__Bacteria; p__Firmicutes; c__Clostridia; o__Clostridiales; f__Ruminococcaceae; g__Candidatus Soleaferrea; s__uncultured bacterium
OTU_1035	0	0	0	0	0	0	0	1	0	0	0	0	0	k__Bacteria; p__Proteobacteria; c__Alphaproteobacteria; o__Reyranellales; f__Reyranellaceae; g__Reyranella; s__uncultured bacterium
OTU_1920	0	0	0	0	0	0	0	0	0	0	0	0	0	k__Bacteria; p__Bacteroidetes; c__Bacteroidia; o__Bacteroidales; f__Muribaculaceae; g__uncultured bacterium; s__uncultured bacterium
OTU_936	0	0	0	0	0	0	0	0	0	0	0	0	0	k__Bacteria; p__Bacteroidetes; c__Bacteroidia; o__Bacteroidales; f__Muribaculaceae; g__metagenome; s__metagenome
OTU_935	0	0	0	1	0	0	0	0	0	0	0	0	0	k__Bacteria; p__Proteobacteria; c__Gammaproteobacteria; o__Pseudomonadales; f__Moraxellaceae; g__Acinetobacter; s__Acinetobacter calcoaceticus
OTU_1088	0	0	0	0	0	0	0	0	0	0	0	0	0	k__Bacteria; p__Firmicutes; c__Clostridia; o__Clostridiales; f__Ruminococcaceae; g__Ruminiclostridium 6
OTU_925	0	0	0	0	0	0	0	0	0	0	0	0	0	k__Bacteria; p__Chloroflexi
OTU_1133	0	0	0	0	0	0	0	0	0	0	0	1	0	k__Bacteria; p__Proteobacteria; c__Alphaproteobacteria; o__Holosporales; f__Holosporaceae; g__uncultured; s__uncultured bacterium
OTU_643	0	0	0	0	0	0	7	0	0	0	0	1	0	k__Bacteria; p__Firmicutes; c__Clostridia; o__Clostridiales; f__Lachnospiraceae
OTU_960	0	0	0	0	0	0	0	0	0	0	0	0	0	k__Bacteria; p__Acidobacteria; c__Acidobacteriia; o__Solibacterales; f__Solibacteraceae (Subgroup 3); g__Bryobacter; s__uncultured bacterium
OTU_928	0	0	0	0	0	0	0	0	0	0	0	0	0	k__Bacteria; p__Proteobacteria; c__Gammaproteobacteria; o__Betaproteobacteriales; f__Burkholderiaceae; g__Lampropedia; s__Lampropedia hyalina
OTU_1739	0	0	0	0	0	0	0	0	0	0	0	1	0	k__Bacteria; p__Proteobacteria; c__Alphaproteobacteria; o__Rhizobiales; f__Beijerinckiaceae
OTU_1099	0	0	0	0	0	0	0	0	0	0	0	0	3	k__Bacteria; p__Firmicutes; c__Clostridia; o__Clostridiales; f__Ruminococcaceae; g__uncultured; s__gut metagenome
OTU_1134	0	0	0	0	0	0	0	0	0	0	1	0	0	k__Bacteria; p__Actinobacteria; c__Thermoleophilia; o__Gaiellales; f__Gaiellaceae; g__Gaiella
OTU_1033	0	0	0	0	0	0	0	0	0	0	0	0	0	k__Bacteria; p__Actinobacteria; c__Acidimicrobiia; o__IMCC26256
OTU_2713	0	0	0	0	0	0	0	0	0	0	0	0	0	k__Bacteria; p__Firmicutes; c__Clostridia; o__Clostridiales; f__Lachnospiraceae
OTU_2532	0	0	0	0	0	0	0	0	0	0	0	0	0	k__Bacteria; p__Firmicutes; c__Clostridia; o__Clostridiales; f__Lachnospiraceae; g__Lachnospiraceae UCG-004
OTU_927	0	0	0	0	0	0	0	0	0	0	0	0	0	k__Bacteria; p__Actinobacteria; c__Actinobacteria; o__Pseudonocardiales; f__Pseudonocardiaceae; g__Amycolatopsis; s__Amycolatopsis sp.
OTU_2180	0	0	0	0	0	0	0	0	0	0	0	0	0	k__Bacteria; p__Firmicutes; c__Clostridia; o__Clostridiales
OTU_762	0	0	0	0	0	1	0	0	0	0	0	0	0	k__Bacteria; p__Firmicutes; c__Clostridia; o__Clostridiales; f__Lachnospiraceae; g__Lachnospiraceae UCG-010; s__uncultured bacterium
OTU_1151	0	0	0	0	0	0	0	0	0	1	0	0	0	k__Bacteria; p__Proteobacteria; c__Gammaproteobacteria; o__Xanthomonadales; f__Rhodanobacteraceae; g__Rhodanobacter
OTU_545	0	0	0	0	0	0	0	0	0	0	0	0	1	k__Bacteria; p__Firmicutes; c__Negativicutes; o__Selenomonadales; f__Acidaminococcaceae; g__Phascolarctobacterium
OTU_2549	0	1	0	0	0	18	0	1	0	0	0	0	0	k__Bacteria; p__Firmicutes; c__Clostridia; o__Clostridiales; f__Lachnospiraceae; g__ASF356; s__uncultured bacterium
OTU_956	0	0	0	0	0	0	0	0	0	0	0	0	0	k__Bacteria; p__Proteobacteria; c__Gammaproteobacteria; o__Diplorickettsiales; f__Diplorickettsiaceae; g__Aquicella
OTU_994	0	0	0	0	0	0	0	0	0	0	0	0	0	k__Bacteria; p__Bacteroidetes; c__Bacteroidia; o__Chitinophagales; f__Chitinophagaceae; g__Flavisolibacter
OTU_785	0	0	0	0	0	0	5	0	0	0	0	0	0	k__Bacteria; p__Firmicutes; c__Clostridia; o__Clostridiales; f__Lachnospiraceae
OTU_1193	0	0	0	0	0	0	0	0	0	0	0	0	0	k__Bacteria; p__Bacteroidetes; c__Bacteroidia; o__Bacteroidales; f__Prevotellaceae; g__Prevotellaceae UCG-004; s__uncultured bacterium
OTU_1013	0	0	0	0	0	0	0	0	0	0	0	0	0	k__Bacteria; p__Cyanobacteria; c__Sericytochromatia
OTU_1478	0	0	0	0	0	0	0	0	0	0	0	0	0	k__Bacteria; p__Bacteroidetes; c__Bacteroidia; o__Cytophagales; f__Microscillaceae; g__uncultured
OTU_2171	0	0	0	0	0	0	0	0	0	0	0	0	17	k__Bacteria; p__Firmicutes; c__Clostridia; o__Clostridiales; f__Lachnospiraceae
OTU_1379	0	0	0	0	0	0	0	0	0	0	0	0	0	k__Bacteria; p__Proteobacteria; c__Deltaproteobacteria; o__Myxococcales; f__Sandaracinaceae; g__uncultured; s__delta proteobacterium LX33
OTU_1335	0	0	0	0	0	0	0	0	0	0	0	0	0	k__Bacteria; p__Actinobacteria; c__Acidimicrobiia; o__Microtrichales; f__Microtrichaceae; g__uncultured; s__metagenome
OTU_1085	0	0	0	0	0	0	0	0	0	0	0	0	0	k__Bacteria; p__Actinobacteria; c__Acidimicrobiia; o__uncultured; f__metagenome; g__metagenome; s__metagenome
OTU_1246	0	0	0	0	0	0	0	0	0	0	0	0	0	k__Bacteria; p__Bacteroidetes; c__Bacteroidia; o__Chitinophagales; f__Chitinophagaceae; g__Segetibacter; s__uncultured bacterium
OTU_579	0	0	0	0	0	0	0	0	0	0	0	0	0	k__Bacteria; p__Firmicutes; c__Bacilli; o__Bacillales; f__Bacillaceae; g__Bacillus
OTU_1391	0	0	0	0	0	0	0	0	0	0	0	0	0	k__Bacteria; p__Firmicutes; c__Erysipelotrichia; o__Erysipelotrichales; f__Erysipelotrichaceae; g__Erysipelatoclostridium; s__Clostridiales bacterium CHKCI006
OTU_1065	0	0	0	0	0	0	0	0	0	0	0	0	0	k__Bacteria; p__Proteobacteria; c__Deltaproteobacteria; o__Desulfovibrionales; f__Desulfovibrionaceae; g__uncultured; s__uncultured Desulfovibrionales bacterium
OTU_890	1	0	0	0	0	0	0	0	0	1	0	0	0	k__Bacteria; p__Firmicutes; c__Clostridia; o__Clostridiales; f__Lachnospiraceae
OTU_2130	7	3	0	0	1	4	0	0	0	0	0	0	3	k__Bacteria; p__Bacteroidetes; c__Bacteroidia; o__Bacteroidales
OTU_1104	0	0	0	0	0	3	0	0	0	0	0	0	0	k__Bacteria; p__Proteobacteria; c__Gammaproteobacteria; o__Betaproteobacteriales; f__Rhodocyclaceae
OTU_1495	0	0	0	0	0	0	0	0	0	0	0	0	0	k__Bacteria; p__Chloroflexi; c__KD4-96; o__uncultured bacterium; f__uncultured bacterium; g__uncultured bacterium; s__uncultured bacterium
OTU_833	0	0	0	0	0	0	7	0	0	0	0	0	0	k__Bacteria; p__Firmicutes; c__Erysipelotrichia; o__Erysipelotrichales; f__Erysipelotrichaceae; g__uncultured; s__uncultured Allobaculum sp.
OTU_867	0	0	0	0	0	0	0	0	0	0	0	0	0	k__Bacteria; p__Firmicutes; c__Clostridia; o__Clostridiales; f__Clostridiales vadinBB60 group; g__uncultured bacterium; s__uncultured bacterium
OTU_1725	0	0	0	0	0	1	0	0	0	0	0	0	0	k__Bacteria; p__Firmicutes; c__Clostridia; o__Clostridiales; f__Lachnospiraceae; g__Lachnospiraceae NK4A136 group; s__uncultured bacterium
OTU_1407	0	0	0	0	0	0	0	0	0	0	0	0	0	k__Bacteria; p__Chloroflexi; c__Ktedonobacteria; o__Ktedonobacterales; f__Ktedonobacteraceae; g__HSB OF53-F07; s__uncultured bacterium
OTU_1068	0	0	0	0	0	0	0	0	0	0	0	0	0	k__Bacteria; p__Bacteroidetes; c__Bacteroidia; o__Chitinophagales; f__Chitinophagaceae; g__uncultured
OTU_1397	0	0	0	0	0	0	0	0	0	0	0	0	0	k__Bacteria; p__Acidobacteria; c__Subgroup 6
OTU_1345	0	0	0	0	0	1	0	0	0	0	0	0	0	k__Bacteria; p__Firmicutes; c__Clostridia; o__Clostridiales; f__Lachnospiraceae
OTU_2524	0	0	0	0	0	0	0	0	0	0	0	0	0	k__Bacteria; p__Firmicutes; c__Clostridia; o__Clostridiales; f__Lachnospiraceae
OTU_1156	1	0	0	0	0	0	0	0	0	0	0	0	0	k__Bacteria; p__Proteobacteria; c__Gammaproteobacteria; o__Betaproteobacteriales; f__Nitrosomonadaceae; g__Ellin6067; s__uncultured bacterium
OTU_1980	0	0	0	0	0	3	0	0	0	0	0	0	0	k__Bacteria; p__Firmicutes; c__Clostridia; o__Clostridiales; f__Ruminococcaceae; g__Anaerotruncus; s__Anaerotruncus sp. G3(2012)
OTU_1276	0	0	0	0	0	0	0	0	0	0	0	0	0	k__Bacteria; p__Actinobacteria; c__Actinobacteria; o__Micrococcales; f__Micrococcaceae; g__Rothia; s__uncultured bacterium
OTU_1395	0	0	0	0	0	0	0	0	0	0	0	0	0	k__Bacteria; p__Proteobacteria; c__Gammaproteobacteria; o__Betaproteobacteriales; f__Neisseriaceae; g__Conchiformibius; s__Conchiformibius kuhniae
OTU_1044	0	0	0	0	0	0	0	0	0	0	0	0	0	k__Bacteria; p__Patescibacteria; c__Saccharimonadia; o__Saccharimonadales
OTU_1139	0	0	0	0	0	0	0	0	0	0	0	0	0	k__Bacteria; p__Acidobacteria; c__Acidobacteriia; o__Acidobacteriales; f__Acidobacteriaceae (Subgroup 1); g__Terriglobus; s__Terriglobus sp. UR 6-13
OTU_1160	0	0	0	0	0	0	0	0	0	0	0	0	0	k__Bacteria; p__Verrucomicrobia; c__Verrucomicrobiae; o__Pedosphaerales; f__Pedosphaeraceae; g__uncultured soil bacterium; s__uncultured soil bacterium
OTU_1645	0	0	0	0	0	0	0	0	0	0	0	0	0	k__Bacteria; p__Firmicutes; c__Clostridia; o__Clostridiales
OTU_954	0	0	0	0	0	0	4	0	0	0	0	0	0	k__Bacteria; p__Firmicutes; c__Bacilli; o__Lactobacillales; f__Lactobacillaceae; g__Lactobacillus; s__Lactobacillus casei
OTU_2108	0	0	0	0	0	0	0	0	0	0	0	0	0	k__Bacteria; p__Firmicutes; c__Clostridia; o__Clostridiales; f__Lachnospiraceae
OTU_2352	0	3	0	0	0	1	0	0	0	0	0	0	0	k__Bacteria; p__Firmicutes; c__Clostridia; o__Clostridiales; f__Ruminococcaceae
OTU_2554	0	1	0	0	0	0	0	0	0	0	0	0	0	k__Bacteria; p__Firmicutes; c__Clostridia; o__Clostridiales
OTU_1522	0	0	0	0	0	0	0	0	0	0	0	0	0	k__Bacteria
OTU_2752	0	0	0	0	0	0	0	0	0	0	0	0	0	k__Bacteria; p__Firmicutes; c__Bacilli; o__Lactobacillales; f__Lactobacillaceae; g__Lactobacillus; s__Lactobacillus rennini DSM 20253
OTU_736	0	0	0	0	0	0	0	0	0	0	0	0	0	k__Bacteria; p__Firmicutes; c__Clostridia; o__Clostridiales; f__Ruminococcaceae; g__Faecalibacterium; s__uncultured bacterium
OTU_735	0	0	0	0	0	0	0	0	0	0	0	0	0	k__Bacteria; p__Firmicutes; c__Erysipelotrichia; o__Erysipelotrichales; f__Erysipelotrichaceae; g__uncultured; s__uncultured bacterium
OTU_672	0	0	0	0	0	0	2	0	0	0	0	0	0	k__Bacteria; p__Firmicutes; c__Clostridia; o__Clostridiales; f__Ruminococcaceae
OTU_770	0	0	0	0	0	0	0	0	0	0	0	1	1	k__Bacteria; p__Firmicutes; c__Clostridia; o__Clostridiales; f__Peptostreptococcaceae; g__Peptostreptococcus; s__uncultured bacterium
OTU_2086	0	0	0	0	0	0	0	0	0	1	0	0	0	k__Bacteria
OTU_1066	0	0	0	0	0	0	0	0	0	0	0	0	0	k__Bacteria; p__Tenericutes; c__Mollicutes; o__Mollicutes RF39; f__uncultured bacterium; g__uncultured bacterium; s__uncultured bacterium
OTU_1852	0	0	0	0	0	0	0	0	0	0	0	0	2	k__Bacteria
OTU_2539	0	0	0	0	0	0	0	0	1	2	0	1	0	k__Bacteria; p__Bacteroidetes; c__Bacteroidia; o__Bacteroidales; f__Muribaculaceae; g__uncultured bacterium; s__uncultured bacterium
OTU_1106	9	1	2	0	2	1	0	0	0	0	0	1	0	k__Bacteria; p__Bacteroidetes; c__Bacteroidia; o__Bacteroidales; f__Muribaculaceae; g__uncultured bacterium; s__uncultured bacterium
OTU_313	0	1	0	0	0	0	0	3	0	31	36	0	0	k__Bacteria; p__Firmicutes; c__Erysipelotrichia; o__Erysipelotrichales; f__Erysipelotrichaceae
OTU_1768	0	0	0	0	1	0	1	0	1	0	2	0	0	k__Bacteria; p__Bacteroidetes; c__Bacteroidia; o__Bacteroidales; f__Muribaculaceae; g__uncultured bacterium; s__uncultured bacterium
OTU_2576	0	1	0	0	0	0	0	0	0	0	0	0	0	k__Bacteria; p__Bacteroidetes; c__Bacteroidia; o__Bacteroidales; f__Muribaculaceae; g__Muribaculum; s__Parabacteroides sp. YL27
OTU_1854	0	0	0	0	0	0	0	0	0	0	0	0	0	k__Bacteria; p__Actinobacteria; c__Thermoleophilia; o__Solirubrobacterales; f__Solirubrobacteraceae; g__uncultured
OTU_2395	0	0	0	0	0	0	0	0	0	0	0	1	0	k__Bacteria; p__Bacteroidetes; c__Bacteroidia; o__Bacteroidales; f__Muribaculaceae; g__uncultured bacterium; s__uncultured bacterium
OTU_1468	1	0	0	0	0	0	0	0	0	0	0	0	0	k__Bacteria; p__Firmicutes; c__Clostridia; o__Clostridiales; f__Ruminococcaceae; g__Candidatus Soleaferrea
OTU_3005	0	0	0	0	0	0	0	0	0	0	0	0	0	k__Bacteria; p__Actinobacteria; c__Acidimicrobiia; o__IMCC26256
OTU_2622	0	0	0	1	0	0	0	0	0	0	0	0	0	k__Bacteria; p__Bacteroidetes; c__Bacteroidia; o__Bacteroidales; f__Prevotellaceae; g__Alloprevotella
OTU_1727	0	0	0	0	0	3	0	0	0	0	0	0	0	k__Bacteria; p__Firmicutes; c__Clostridia; o__Clostridiales
OTU_1119	0	1	0	0	0	1	0	0	0	0	0	0	0	k__Bacteria; p__Firmicutes; c__Clostridia; o__Clostridiales; f__Ruminococcaceae
OTU_993	0	0	0	0	0	0	0	0	0	0	0	0	0	k__Bacteria; p__Bacteroidetes; c__Bacteroidia; o__Chitinophagales; f__Chitinophagaceae; g__Flavihumibacter
OTU_2938	0	0	0	0	0	0	0	0	0	0	0	0	0	k__Bacteria; p__Acidobacteria; c__Acidobacteriia; o__Acidobacteriales; f__uncultured; g__uncultured Acidobacteria bacterium; s__uncultured Acidobacteria bacterium
OTU_1535	0	0	0	0	0	0	0	0	0	0	0	0	2	k__Bacteria; p__Bacteroidetes; c__Bacteroidia; o__Bacteroidales; f__Muribaculaceae
OTU_2003	0	0	0	0	0	1	0	0	0	0	0	0	0	k__Bacteria; p__Bacteroidetes; c__Bacteroidia; o__Bacteroidales; f__Muribaculaceae
OTU_2375	0	0	0	0	0	0	0	0	0	0	0	0	0	k__Bacteria; p__Bacteroidetes; c__Bacteroidia; o__Bacteroidales; f__Prevotellaceae
OTU_2138	0	0	0	0	1	0	0	0	0	0	0	1	0	k__Bacteria; p__Firmicutes; c__Clostridia; o__Clostridiales; f__Ruminococcaceae
OTU_1424	0	0	0	0	0	0	0	0	0	0	0	0	0	k__Bacteria; p__Bacteroidetes; c__Bacteroidia; o__Bacteroidales; f__Muribaculaceae; g__uncultured bacterium; s__uncultured bacterium
OTU_1533	0	2	0	0	0	0	0	0	0	0	0	0	0	k__Bacteria
OTU_2950	0	0	0	0	0	1	0	0	0	0	0	0	0	k__Bacteria; p__Bacteroidetes; c__Bacteroidia; o__Bacteroidales
OTU_1380	0	0	0	0	0	0	0	1	0	0	0	0	1	k__Bacteria; p__Firmicutes; c__Clostridia; o__Clostridiales; f__Clostridiaceae 1; g__Clostridium sensu stricto 1
OTU_2922	0	0	0	0	0	0	0	1	0	0	0	0	0	k__Bacteria; p__Firmicutes; c__Clostridia; o__Clostridiales; f__Lachnospiraceae; g__Lachnospiraceae NK4A136 group; s__uncultured bacterium
OTU_1945	0	0	0	0	0	0	0	0	0	0	0	0	0	k__Bacteria; p__Bacteroidetes; c__Bacteroidia; o__Bacteroidales; f__Muribaculaceae; g__uncultured bacterium; s__uncultured bacterium
OTU_1684	3	0	1	5	0	0	0	0	0	0	0	2	4	k__Bacteria; p__Bacteroidetes; c__Bacteroidia; o__Bacteroidales
OTU_2102	2	0	0	0	0	0	0	0	0	0	0	0	1	k__Bacteria; p__Bacteroidetes; c__Bacteroidia; o__Bacteroidales
OTU_1252	0	0	0	0	0	0	0	1	0	0	0	0	0	k__Bacteria; p__Actinobacteria; c__Actinobacteria; o__Micrococcales; f__Brevibacteriaceae; g__Brevibacterium; s__uncultured bacterium
OTU_2349	0	0	0	0	0	0	0	0	0	0	0	0	0	k__Bacteria
OTU_2147	0	0	0	0	0	0	0	0	0	0	0	0	0	k__Bacteria; p__Firmicutes; c__Clostridia; o__Clostridiales; f__Peptostreptococcaceae
OTU_2572	0	0	0	0	0	0	0	0	0	0	0	0	0	k__Bacteria; p__Bacteroidetes; c__Bacteroidia; o__Bacteroidales
OTU_1776	0	0	0	0	0	0	0	0	0	0	0	0	0	k__Bacteria; p__Bacteroidetes; c__Bacteroidia; o__Bacteroidales; f__Prevotellaceae; g__Alloprevotella
OTU_2001	0	1	0	0	0	0	7	4	0	0	0	0	1	k__Bacteria; p__Firmicutes; c__Clostridia; o__Clostridiales; f__Lachnospiraceae
OTU_1195	0	0	0	0	0	0	0	0	0	0	0	0	0	k__Bacteria; p__Bacteroidetes; c__Bacteroidia; o__Bacteroidales; f__Muribaculaceae; g__uncultured bacterium; s__uncultured bacterium
OTU_2534	0	0	3	0	0	0	0	0	0	0	0	0	1	k__Bacteria; p__Bacteroidetes; c__Bacteroidia; o__Bacteroidales; f__Muribaculaceae; g__uncultured bacterium; s__uncultured bacterium
OTU_2488	0	0	0	0	0	0	0	0	0	0	0	0	0	k__Bacteria; p__Bacteroidetes; c__Bacteroidia; o__Bacteroidales; f__Muribaculaceae; g__uncultured bacterium; s__uncultured bacterium
OTU_1477	0	0	1	0	0	3	0	0	0	0	0	0	0	k__Bacteria; p__Firmicutes; c__Clostridia; o__Clostridiales; f__Clostridiales vadinBB60 group; g__uncultured bacterium; s__uncultured bacterium
OTU_1542	0	0	0	0	0	0	0	0	0	0	0	0	0	k__Bacteria
OTU_1169	0	0	0	0	2	0	0	0	0	0	0	0	0	k__Bacteria; p__Firmicutes; c__Clostridia; o__Clostridiales; f__Christensenellaceae
OTU_2015	0	0	0	0	0	0	0	0	0	0	0	0	4	k__Bacteria; p__Bacteroidetes; c__Bacteroidia; o__Bacteroidales; f__Muribaculaceae; g__uncultured bacterium; s__uncultured bacterium
OTU_1194	0	0	0	0	0	0	0	0	0	0	0	0	0	k__Bacteria; p__Bacteroidetes; c__Bacteroidia; o__Bacteroidales
OTU_1208	0	0	0	0	0	0	0	0	0	0	0	0	0	k__Bacteria
OTU_2112	0	0	0	0	0	0	0	0	0	0	0	1	0	k__Bacteria; p__Bacteroidetes; c__Bacteroidia; o__Bacteroidales; f__Rikenellaceae; g__Alistipes
OTU_1426	0	0	0	0	0	0	0	0	0	0	0	0	0	k__Bacteria
OTU_1621	0	0	0	0	0	0	0	0	0	0	0	0	0	k__Bacteria; p__Bacteroidetes; c__Bacteroidia; o__Bacteroidales; f__Rikenellaceae; g__Alistipes
OTU_2954	0	0	0	0	0	0	0	0	0	0	0	0	0	k__Bacteria; p__Bacteroidetes; c__Bacteroidia; o__Bacteroidales; f__Rikenellaceae; g__Alistipes
OTU_2654	0	0	1	0	0	0	0	0	0	0	0	0	0	k__Bacteria
OTU_1767	0	0	0	0	0	0	0	0	0	0	0	0	0	k__Bacteria; p__Bacteroidetes; c__Bacteroidia; o__Bacteroidales; f__Muribaculaceae; g__uncultured bacterium; s__uncultured bacterium
OTU_2521	2	0	0	0	0	0	0	0	0	1	0	0	0	k__Bacteria; p__Bacteroidetes; c__Bacteroidia; o__Bacteroidales; f__Muribaculaceae; g__uncultured bacterium; s__uncultured bacterium
OTU_817	13	0	0	0	0	0	0	0	85	0	0	0	1	k__Bacteria; p__Firmicutes; c__Clostridia; o__Clostridiales; f__Ruminococcaceae; g__Flavonifractor; s__uncultured bacterium
OTU_1569	0	0	0	0	0	0	0	0	0	0	0	0	0	k__Bacteria
OTU_1911	0	0	0	0	0	0	0	0	0	0	0	0	0	k__Bacteria; p__Firmicutes; c__Clostridia; o__Clostridiales; f__Lachnospiraceae
OTU_120	0	0	2	0	1	0	0	0	1	0	0	20	0	k__Bacteria; p__Bacteroidetes; c__Bacteroidia; o__Bacteroidales; f__Rikenellaceae; g__Rikenella; s__Rikenella microfusus DSM 15922
OTU_1844	0	0	0	0	0	0	0	0	0	0	0	1	0	k__Bacteria; p__Bacteroidetes; c__Bacteroidia; o__Bacteroidales; f__Prevotellaceae; g__Alloprevotella
OTU_2464	0	0	2	0	0	0	0	0	0	0	0	0	6	k__Bacteria; p__Bacteroidetes; c__Bacteroidia; o__Bacteroidales; f__Muribaculaceae; g__uncultured bacterium; s__uncultured bacterium
OTU_1906	0	0	0	0	0	0	0	0	0	0	0	0	0	k__Bacteria; p__Bacteroidetes; c__Bacteroidia; o__Bacteroidales; f__Muribaculaceae; g__uncultured bacterium; s__uncultured bacterium
OTU_947	0	0	0	0	0	0	0	0	0	0	0	0	0	k__Bacteria; p__Bacteroidetes; c__Bacteroidia; o__Flavobacteriales; f__Weeksellaceae; g__Chryseobacterium
OTU_1249	0	0	0	0	0	0	0	0	0	0	0	0	0	k__Bacteria; p__Firmicutes; c__Clostridia; o__Clostridiales; f__Ruminococcaceae; g__uncultured
OTU_2946	0	0	0	0	0	0	0	0	0	0	0	0	0	k__Bacteria; p__Bacteroidetes; c__Bacteroidia; o__Bacteroidales
OTU_2718	0	0	2	0	0	0	0	0	0	0	4	0	0	k__Bacteria; p__Bacteroidetes; c__Bacteroidia; o__Bacteroidales
OTU_2257	0	0	0	0	0	0	0	0	0	0	0	0	0	k__Bacteria; p__Bacteroidetes; c__Bacteroidia; o__Bacteroidales; f__Muribaculaceae
OTU_1576	0	0	0	0	0	0	0	0	0	0	0	0	0	k__Bacteria; p__Firmicutes; c__Clostridia; o__Clostridiales; f__Ruminococcaceae
OTU_2301	0	0	0	0	0	0	0	0	0	0	0	0	0	k__Bacteria; p__Bacteroidetes; c__Bacteroidia; o__Bacteroidales
OTU_2911	0	1	0	0	0	0	0	0	0	0	0	1	0	k__Bacteria; p__Bacteroidetes; c__Bacteroidia; o__Bacteroidales
OTU_1367	0	0	1	0	0	0	0	0	0	0	0	3	0	k__Bacteria; p__Bacteroidetes; c__Bacteroidia; o__Bacteroidales; f__Muribaculaceae; g__uncultured bacterium; s__uncultured bacterium
OTU_2259	0	0	0	0	0	0	0	0	0	0	0	0	1	k__Bacteria; p__Bacteroidetes; c__Bacteroidia; o__Bacteroidales
OTU_329	0	0	4	1	0	0	0	1	12	0	0	0	0	k__Bacteria; p__Bacteroidetes; c__Bacteroidia; o__Bacteroidales; f__Muribaculaceae; g__uncultured bacterium; s__uncultured bacterium
OTU_2616	0	0	0	0	0	0	0	0	0	1	0	0	0	k__Bacteria; p__Bacteroidetes; c__Bacteroidia; o__Bacteroidales; f__Muribaculaceae; g__uncultured bacterium; s__uncultured bacterium
OTU_1861	0	0	0	0	0	1	0	0	0	0	0	0	0	k__Bacteria; p__Bacteroidetes; c__Bacteroidia; o__Bacteroidales; f__Rikenellaceae; g__Alistipes
OTU_2296	0	0	1	0	0	0	0	0	0	0	0	0	0	k__Bacteria; p__Bacteroidetes; c__Bacteroidia; o__Bacteroidales; f__Muribaculaceae; g__uncultured bacterium; s__uncultured bacterium
OTU_1351	0	0	0	0	0	0	0	0	0	0	0	0	0	k__Bacteria; p__Firmicutes; c__Clostridia; o__Clostridiales; f__Lachnospiraceae
OTU_2263	0	0	0	0	0	0	0	0	0	0	0	0	0	k__Bacteria; p__Bacteroidetes; c__Bacteroidia; o__Bacteroidales; f__Barnesiellaceae; g__Coprobacter
OTU_156	18	0	16	78	13	15	1	3	18	0	0	0	0	k__Bacteria; p__Firmicutes; c__Erysipelotrichia; o__Erysipelotrichales; f__Erysipelotrichaceae; g__Erysipelatoclostridium; s__uncultured bacterium
OTU_2266	0	0	0	0	0	0	0	0	0	0	0	0	0	k__Bacteria; p__Bacteroidetes; c__Bacteroidia; o__Bacteroidales; f__Muribaculaceae; g__uncultured bacterium; s__uncultured bacterium
OTU_1798	0	0	0	0	0	0	0	0	0	0	0	0	1	k__Bacteria; p__Firmicutes; c__Clostridia; o__Clostridiales; f__Lachnospiraceae; g__ASF356; s__uncultured Clostridiales bacterium
OTU_2369	0	0	0	0	0	0	0	0	0	0	0	0	0	k__Bacteria
OTU_1297	0	0	0	0	0	0	0	0	0	0	0	0	0	k__Bacteria; p__Firmicutes; c__Clostridia; o__Clostridiales; f__Clostridiaceae 1
OTU_1311	0	0	0	0	0	0	0	0	0	0	0	0	0	k__Bacteria; p__Firmicutes; c__Clostridia; o__Clostridiales; f__Ruminococcaceae
OTU_2897	0	0	0	0	0	0	0	0	0	0	0	0	0	k__Bacteria; p__Bacteroidetes; c__Bacteroidia; o__Bacteroidales
OTU_1303	0	0	0	0	0	0	0	0	0	0	0	0	0	k__Bacteria; p__Bacteroidetes; c__Bacteroidia; o__Bacteroidales; f__Muribaculaceae
OTU_2889	0	0	4	0	9	0	0	0	4	1	18	0	0	k__Bacteria; p__Bacteroidetes; c__Bacteroidia; o__Bacteroidales; f__Muribaculaceae; g__uncultured bacterium; s__uncultured bacterium
OTU_2957	0	0	0	0	0	0	0	0	1	0	0	0	0	k__Bacteria; p__Firmicutes; c__Clostridia; o__Clostridiales
OTU_2420	0	0	0	0	0	0	0	0	0	0	0	0	0	k__Bacteria; p__Bacteroidetes; c__Bacteroidia; o__Bacteroidales; f__Muribaculaceae
OTU_1349	0	0	1	0	0	0	0	1	0	1	0	0	0	k__Bacteria; p__Bacteroidetes; c__Bacteroidia; o__Bacteroidales; f__Muribaculaceae; g__uncultured bacterium; s__uncultured bacterium
OTU_2992	0	0	0	3	0	0	0	0	0	0	0	1	0	k__Bacteria
OTU_2408	0	0	0	0	0	0	0	0	0	0	0	0	0	k__Bacteria; p__Bacteroidetes; c__Bacteroidia; o__Bacteroidales; f__Tannerellaceae; g__Parabacteroides
OTU_1573	0	0	0	0	0	0	0	0	0	0	0	0	0	k__Bacteria; p__Firmicutes; c__Clostridia; o__Clostridiales; f__Ruminococcaceae
OTU_2490	0	0	0	0	0	0	0	0	0	0	0	0	0	k__Bacteria; p__Firmicutes; c__Clostridia; o__Clostridiales; f__Lachnospiraceae
OTU_2232	0	0	0	0	0	0	0	0	0	0	0	0	0	k__Bacteria; p__Firmicutes; c__Clostridia; o__Clostridiales; f__Lachnospiraceae
OTU_2231	0	0	0	0	0	0	0	0	0	0	0	0	0	k__Bacteria; p__Firmicutes; c__Clostridia; o__Clostridiales; f__Lachnospiraceae; g__Roseburia
OTU_1257	0	0	0	0	0	3	0	0	0	0	0	0	0	k__Bacteria; p__Firmicutes; c__Clostridia; o__Clostridiales
OTU_2450	0	0	0	1	3	1	2	0	0	0	0	0	0	k__Bacteria; p__Bacteroidetes; c__Bacteroidia; o__Bacteroidales
OTU_1564	0	0	2	0	0	0	0	0	0	5	2	0	0	k__Bacteria; p__Firmicutes; c__Clostridia; o__Clostridiales; f__Lachnospiraceae
OTU_2253	0	2	0	0	0	0	0	0	0	0	0	0	0	k__Bacteria; p__Firmicutes; c__Clostridia; o__Clostridiales; f__Ruminococcaceae
OTU_2963	0	0	0	0	0	0	0	0	0	0	0	0	0	k__Bacteria
OTU_1845	0	0	0	6	0	2	0	0	0	0	0	0	0	k__Bacteria; p__Firmicutes; c__Clostridia; o__Clostridiales; f__Lachnospiraceae
OTU_2452	0	0	0	0	0	0	0	0	0	0	0	0	0	k__Bacteria; p__Firmicutes; c__Clostridia; o__Clostridiales; f__Lachnospiraceae
OTU_2167	0	0	0	0	0	0	0	0	0	0	0	0	1	k__Bacteria; p__Bacteroidetes; c__Bacteroidia; o__Bacteroidales; f__Muribaculaceae
OTU_1698	0	0	2	0	0	0	0	0	0	0	0	0	0	k__Bacteria
OTU_2193	0	0	0	0	0	0	0	0	0	0	0	0	0	k__Bacteria
OTU_2516	0	0	0	0	0	0	0	0	0	0	0	0	0	k__Bacteria
OTU_1520	0	0	0	0	0	0	0	0	0	0	0	0	0	k__Bacteria
OTU_2581	0	0	0	0	0	0	0	0	0	0	0	0	0	k__Bacteria; p__Firmicutes; c__Clostridia; o__Clostridiales
OTU_2314	0	0	0	0	0	0	0	0	0	0	0	0	0	k__Bacteria
OTU_2164	0	0	0	0	0	0	0	0	0	0	0	0	0	k__Bacteria
OTU_2628	0	0	1	0	0	0	0	0	0	0	0	1	0	k__Bacteria; p__Bacteroidetes; c__Bacteroidia; o__Bacteroidales; f__Muribaculaceae; g__uncultured bacterium; s__uncultured bacterium
OTU_2945	2	0	0	0	0	0	0	0	0	2	0	3	0	k__Bacteria; p__Bacteroidetes; c__Bacteroidia; o__Bacteroidales; f__Muribaculaceae; g__uncultured bacterium; s__uncultured bacterium
OTU_1609	0	0	0	0	0	1	0	0	0	0	0	0	0	k__Bacteria; p__Firmicutes; c__Clostridia; o__Clostridiales; f__Ruminococcaceae
OTU_2195	0	0	0	0	0	0	0	0	0	0	0	0	0	k__Bacteria; p__Bacteroidetes; c__Bacteroidia; o__Bacteroidales; f__Bacteroidaceae; g__Bacteroides
OTU_1672	0	0	0	0	0	1	0	0	0	0	0	0	0	k__Bacteria; p__Firmicutes; c__Clostridia; o__Clostridiales; f__Lachnospiraceae
OTU_1171	0	0	0	0	0	0	0	0	0	0	0	0	0	k__Bacteria; p__Firmicutes; c__Clostridia; o__Clostridiales; f__Lachnospiraceae; g__Lachnospiraceae NK4A136 group
OTU_2997	0	0	0	0	0	0	0	0	0	0	0	0	0	k__Bacteria; p__Firmicutes; c__Clostridia; o__Clostridiales; f__Lachnospiraceae
OTU_2328	0	0	0	0	0	0	0	0	0	0	0	0	0	k__Bacteria; p__Firmicutes; c__Clostridia; o__Clostridiales; f__Lachnospiraceae
OTU_1452	0	0	0	0	0	13	0	0	0	0	0	0	0	k__Bacteria; p__Firmicutes; c__Clostridia; o__Clostridiales
OTU_2141	0	0	0	0	0	0	0	0	0	0	0	0	0	k__Bacteria
OTU_2154	0	0	0	0	0	0	0	0	0	0	0	0	0	k__Bacteria; p__Firmicutes; c__Clostridia; o__Clostridiales; f__Lachnospiraceae; g__uncultured; s__uncultured bacterium
OTU_1097	0	0	0	0	0	0	0	0	0	0	0	0	0	k__Bacteria; p__Firmicutes; c__Clostridia; o__Clostridiales; f__Lachnospiraceae
OTU_2866	0	0	0	0	0	0	0	0	0	0	0	0	0	k__Bacteria; p__Bacteroidetes; c__Bacteroidia; o__Bacteroidales
OTU_252	0	35	0	0	0	45	0	0	0	0	0	0	0	k__Bacteria; p__Firmicutes; c__Clostridia; o__Clostridiales; f__Lachnospiraceae; g__Roseburia; s__uncultured bacterium
OTU_1813	0	0	0	0	0	0	0	0	0	0	0	0	0	k__Bacteria; p__Firmicutes; c__Clostridia; o__Clostridiales; f__Lachnospiraceae
OTU_2504	0	0	0	0	0	0	0	0	0	0	0	0	0	k__Bacteria
OTU_2861	0	0	0	0	0	0	0	0	0	0	0	0	0	k__Bacteria; p__Bacteroidetes; c__Bacteroidia; o__Bacteroidales
OTU_2970	0	0	0	0	0	1	0	0	0	0	0	0	0	k__Bacteria; p__Firmicutes; c__Clostridia; o__Clostridiales; f__Lachnospiraceae
OTU_1388	0	0	0	1	0	0	0	0	0	0	1	0	0	k__Bacteria; p__Proteobacteria; c__Gammaproteobacteria; o__Pseudomonadales; f__Moraxellaceae; g__Acinetobacter; s__Acinetobacter ursingii NIPH 706
OTU_1121	0	0	0	0	0	2	0	0	0	2	0	1	0	k__Bacteria; p__Proteobacteria; c__Gammaproteobacteria; o__Betaproteobacteriales; f__Burkholderiaceae; g__Sutterella; s__uncultured bacterium
OTU_2755	0	0	0	0	0	0	0	0	0	0	0	0	0	k__Bacteria
OTU_1482	0	0	0	0	0	0	0	0	0	0	0	3	0	k__Bacteria; p__Bacteroidetes; c__Bacteroidia; o__Bacteroidales; f__Muribaculaceae; g__uncultured bacterium; s__uncultured bacterium
OTU_2728	0	0	0	0	0	0	0	0	0	0	0	2	0	k__Bacteria
OTU_1687	0	0	0	0	0	2	0	0	0	0	0	0	0	k__Bacteria; p__Bacteroidetes; c__Bacteroidia; o__Bacteroidales; f__Rikenellaceae; g__Alistipes; s__uncultured bacterium
OTU_2254	0	0	0	0	0	0	0	0	0	0	0	0	0	k__Bacteria; p__Bacteroidetes; c__Bacteroidia; o__Bacteroidales; f__Rikenellaceae; g__Alistipes
OTU_2315	0	0	0	0	0	0	0	0	0	0	0	0	0	k__Bacteria; p__Firmicutes; c__Clostridia; o__Clostridiales; f__Lachnospiraceae
OTU_2846	0	0	0	0	0	0	0	0	0	0	0	0	0	k__Bacteria; p__Bacteroidetes; c__Bacteroidia; o__Bacteroidales; f__Muribaculaceae
OTU_1899	0	0	0	0	0	0	0	0	0	0	0	0	0	k__Bacteria
OTU_1559	0	0	0	0	0	0	0	0	0	1	0	0	0	k__Bacteria; p__Bacteroidetes; c__Bacteroidia; o__Bacteroidales
OTU_1539	0	0	0	0	0	0	0	0	0	0	0	0	0	k__Bacteria
OTU_2698	0	0	0	0	0	0	0	0	0	0	0	0	0	k__Bacteria; p__Bacteroidetes; c__Bacteroidia; o__Bacteroidales
OTU_2851	0	0	0	0	0	0	0	0	0	0	0	0	0	k__Bacteria; p__Bacteroidetes; c__Bacteroidia; o__Bacteroidales; f__Muribaculaceae
OTU_2439	0	0	0	0	0	0	0	0	0	0	0	0	0	k__Bacteria
OTU_1832	0	8	1	0	0	8	0	0	0	0	0	0	3	k__Bacteria; p__Firmicutes; c__Clostridia; o__Clostridiales; f__Ruminococcaceae; g__Ruminiclostridium 5
OTU_1117	0	0	0	0	0	0	0	1	0	0	0	0	0	k__Bacteria; p__Actinobacteria; c__Actinobacteria; o__Micrococcales; f__Brevibacteriaceae; g__Brevibacterium; s__Brevibacterium epidermidis
OTU_864	0	0	0	0	0	0	0	6	0	0	0	0	0	k__Bacteria
OTU_1163	0	0	0	0	0	0	0	4	0	0	0	0	0	k__Bacteria; p__Proteobacteria; c__Deltaproteobacteria; o__Desulfobacterales; f__Desulfobulbaceae
OTU_842	2	3	1	0	0	0	0	1	0	3	4	1	0	k__Bacteria; p__Proteobacteria; c__Gammaproteobacteria; o__Betaproteobacteriales; f__Methylophilaceae; g__Methylotenera; s__uncultured bacterium
OTU_726	0	0	0	0	0	0	0	8	0	0	0	0	0	k__Bacteria; p__Patescibacteria; c__Microgenomatia; o__Candidatus Woesebacteria; f__groundwater metagenome; g__groundwater metagenome; s__groundwater metagenome
OTU_2493	0	0	0	0	1	0	0	0	1	0	0	0	0	k__Bacteria; p__Proteobacteria; c__Gammaproteobacteria; o__Betaproteobacteriales; f__TRA3-20; g__uncultured bacterium; s__uncultured bacterium
OTU_1352	0	0	0	0	0	0	0	0	0	0	1	1	0	k__Bacteria; p__Proteobacteria; c__Gammaproteobacteria; o__Xanthomonadales; f__Rhodanobacteraceae; g__uncultured; s__uncultured bacterium
OTU_2494	0	0	0	0	0	0	0	4	0	0	0	0	0	k__Bacteria; p__Proteobacteria; c__Gammaproteobacteria; o__Betaproteobacteriales; f__Burkholderiaceae; g__Sphaerotilus; s__uncultured bacterium
OTU_756	0	0	0	0	0	0	0	4	0	0	0	0	0	k__Bacteria; p__Tenericutes; c__Mollicutes; o__Mollicutes RF39
OTU_880	0	0	0	0	0	0	6	2	0	0	0	0	0	k__Bacteria; p__Firmicutes; c__Bacilli; o__Lactobacillales; f__Lactobacillaceae; g__Lactobacillus
OTU_1072	0	0	0	1	3	1	0	1	0	0	0	0	0	k__Bacteria; p__Proteobacteria; c__Gammaproteobacteria; o__Betaproteobacteriales; f__Burkholderiaceae; g__Noviherbaspirillum; s__uncultured bacterium
OTU_824	0	0	0	0	0	0	0	11	0	0	0	0	0	k__Bacteria; p__Tenericutes; c__Mollicutes; o__Mollicutes RF39; f__uncultured bacterium; g__uncultured bacterium; s__uncultured bacterium
OTU_794	0	0	0	1	0	0	0	4	0	0	0	0	0	k__Bacteria; p__Proteobacteria; c__Gammaproteobacteria; o__Betaproteobacteriales; f__Burkholderiaceae; g__Burkholderia-Caballeronia-Paraburkholderia
OTU_1016	0	0	0	0	0	0	0	1	0	0	0	0	0	k__Bacteria; p__Firmicutes; c__Clostridia; o__Clostridiales; f__Clostridiaceae 1; g__Clostridium sensu stricto 1; s__Clostridium aurantibutyricum
OTU_349	0	1	0	0	0	0	1	3	0	0	0	0	0	k__Bacteria; p__Firmicutes; c__Clostridia; o__Clostridiales; f__Ruminococcaceae; g__Ruminococcaceae UCG-014; s__uncultured bacterium
OTU_1328	0	0	0	0	0	0	0	3	0	0	0	0	0	k__Bacteria; p__Bacteroidetes; c__Bacteroidia; o__Flavobacteriales; f__NS9 marine group
OTU_1034	0	0	0	0	0	0	1	0	2	0	0	0	0	k__Bacteria; p__Bacteroidetes; c__Bacteroidia; o__Bacteroidales; f__Muribaculaceae; g__uncultured bacterium; s__uncultured bacterium
OTU_2716	0	0	0	0	0	0	0	2	0	0	0	0	0	k__Bacteria; p__Bacteroidetes; c__Bacteroidia; o__Bacteroidales; f__Bacteroidaceae; g__Bacteroides; s__uncultured bacterium
OTU_2717	0	0	0	0	0	0	0	1	0	0	0	0	0	k__Bacteria; p__Firmicutes; c__Erysipelotrichia; o__Erysipelotrichales; f__Erysipelotrichaceae; g__Erysipelatoclostridium
OTU_1939	0	0	1	1	0	0	0	1	0	0	0	0	1	k__Bacteria; p__Verrucomicrobia; c__Verrucomicrobiae; o__Chthoniobacterales; f__Chthoniobacteraceae; g__Candidatus Udaeobacter; s__uncultured Verrucomicrobia bacterium
OTU_1050	0	0	0	0	0	0	0	0	0	0	0	0	0	k__Bacteria; p__Bacteroidetes; c__Bacteroidia; o__Sphingobacteriales; f__Sphingobacteriaceae; g__Sphingobacterium; s__Sphingobacterium faecium
OTU_984	0	0	0	0	0	0	0	3	0	0	0	0	0	k__Bacteria; p__Proteobacteria; c__Alphaproteobacteria; o__Rhodobacterales; f__Rhodobacteraceae
OTU_2307	0	0	0	0	0	0	1	3	0	0	0	0	0	k__Bacteria; p__Tenericutes; c__Mollicutes; o__Mollicutes RF39
OTU_1108	0	0	0	0	0	2	1	1	0	0	0	0	0	k__Bacteria; p__Proteobacteria; c__Alphaproteobacteria; o__Rickettsiales; f__Mitochondria
OTU_2775	0	0	0	0	0	0	0	0	0	0	0	0	0	k__Bacteria; p__Bacteroidetes; c__Bacteroidia; o__Bacteroidales; f__Tannerellaceae; g__Parabacteroides; s__uncultured bacterium
OTU_2535	0	0	0	0	0	0	0	1	0	0	0	0	0	k__Bacteria; p__Bacteroidetes; c__Bacteroidia; o__Bacteroidales; f__Muribaculaceae; g__uncultured bacterium; s__uncultured bacterium
OTU_2098	0	1	0	0	0	0	0	0	0	0	0	0	0	k__Bacteria; p__Firmicutes; c__Clostridia; o__Clostridiales; f__Ruminococcaceae; g__Ruminococcaceae UCG-014
OTU_822	0	0	0	0	0	0	0	0	0	0	0	0	0	k__Bacteria; p__Proteobacteria; c__Gammaproteobacteria; o__Xanthomonadales; f__Xanthomonadaceae; g__Stenotrophomonas
OTU_856	0	0	0	0	0	0	0	1	3	0	0	0	0	k__Bacteria; p__Actinobacteria; c__Coriobacteriia; o__Coriobacteriales; f__Eggerthellaceae; g__Enterorhabdus; s__uncultured bacterium
OTU_895	0	0	0	0	0	0	0	0	0	0	0	0	0	k__Bacteria; p__Bacteroidetes; c__Bacteroidia; o__Bacteroidales; f__Muribaculaceae; g__uncultured bacterium; s__uncultured bacterium
OTU_2760	0	0	0	0	0	0	0	0	0	0	0	0	0	k__Bacteria; p__Firmicutes; c__Clostridia; o__Clostridiales; f__Ruminococcaceae; g__Ruminococcaceae UCG-014
OTU_717	2	0	1	0	0	0	0	1	0	0	0	0	0	k__Bacteria; p__Firmicutes; c__Clostridia; o__Clostridiales; f__Family XI; g__Ezakiella; s__Ezakiella massiliensis
OTU_851	0	0	1	0	0	0	0	0	6	0	0	0	0	k__Bacteria; p__Proteobacteria; c__Gammaproteobacteria; o__Pseudomonadales; f__Moraxellaceae; g__Psychrobacter
OTU_1843	0	0	0	0	1	0	0	0	1	0	0	1	0	k__Bacteria
OTU_973	1	0	0	0	0	0	1	0	0	0	0	0	1	k__Bacteria; p__Proteobacteria; c__Alphaproteobacteria; o__Rhizobiales; f__Beijerinckiaceae; g__Chelatococcus; s__uncultured Chelatococcus sp.
OTU_1590	0	0	0	0	0	0	0	0	4	0	0	0	0	k__Bacteria
OTU_2215	0	0	0	0	0	0	0	0	4	0	0	0	0	k__Bacteria; p__Firmicutes; c__Clostridia; o__Clostridiales; f__Clostridiales vadinBB60 group; g__uncultured bacterium; s__uncultured bacterium
OTU_719	0	1	0	0	0	0	0	0	5	0	0	0	0	k__Bacteria; p__Firmicutes; c__Clostridia; o__Clostridiales
OTU_1047	0	0	0	0	0	0	0	0	0	1	5	0	0	k__Bacteria; p__Firmicutes; c__Clostridia; o__Clostridiales; f__Lachnospiraceae
OTU_2145	0	0	0	0	3	0	0	0	0	0	0	0	1	k__Bacteria; p__Bacteroidetes; c__Bacteroidia; o__Bacteroidales; f__Muribaculaceae; g__uncultured bacterium; s__uncultured bacterium
OTU_917	0	0	0	0	0	0	0	0	2	0	0	0	0	k__Bacteria; p__Tenericutes; c__Mollicutes; o__Mycoplasmatales; f__Mycoplasmataceae; g__Mycoplasma; s__Mycoplasma sualvi
OTU_814	0	0	0	0	0	0	0	0	1	0	0	0	0	k__Bacteria; p__Actinobacteria; c__Thermoleophilia; o__Solirubrobacterales; f__67-14; g__metagenome; s__metagenome
OTU_2302	0	1	0	0	0	0	0	0	1	0	0	0	0	k__Bacteria; p__Bacteroidetes; c__Bacteroidia; o__Bacteroidales; f__Muribaculaceae
OTU_2932	0	0	0	0	0	0	0	0	1	0	0	0	0	k__Bacteria; p__Firmicutes; c__Erysipelotrichia; o__Erysipelotrichales; f__Erysipelotrichaceae; g__Erysipelothrix; s__uncultured bacterium
OTU_2939	0	0	0	0	0	0	0	0	1	0	0	0	0	k__Bacteria; p__Firmicutes; c__Clostridia; o__Clostridiales; f__Ruminococcaceae; g__Ruminococcus 1
OTU_2714	0	0	0	0	0	0	0	0	1	0	0	0	0	k__Bacteria; p__Bacteroidetes; c__Bacteroidia; o__Bacteroidales; f__Muribaculaceae; g__uncultured bacterium; s__uncultured bacterium
OTU_1309	0	0	0	0	0	0	0	0	3	0	0	0	0	k__Bacteria; p__Firmicutes; c__Bacilli; o__Lactobacillales; f__Aerococcaceae; g__Facklamia
OTU_2280	0	0	0	0	0	0	0	0	1	0	0	0	0	k__Bacteria; p__Firmicutes; c__Clostridia; o__Clostridiales
OTU_2109	0	0	0	0	0	0	0	0	1	0	0	0	0	k__Bacteria
OTU_690	0	0	0	0	0	0	0	0	1	0	0	0	0	k__Bacteria; p__Proteobacteria; c__Gammaproteobacteria; o__Betaproteobacteriales; f__Burkholderiaceae; g__Tepidimonas; s__uncultured bacterium
OTU_2435	0	0	0	0	0	0	0	0	1	0	0	1	3	k__Bacteria; p__Bacteroidetes; c__Bacteroidia; o__Bacteroidales; f__Muribaculaceae; g__uncultured bacterium; s__uncultured bacterium
OTU_2748	0	0	0	0	0	0	0	0	1	0	0	0	0	k__Bacteria; p__Bacteroidetes; c__Bacteroidia; o__Bacteroidales; f__Bacteroidaceae; g__Bacteroides
OTU_2730	0	0	0	0	0	0	0	0	0	0	0	0	0	k__Bacteria; p__Bacteroidetes; c__Bacteroidia; o__Bacteroidales; f__Muribaculaceae; g__Muribaculum; s__Parabacteroides sp. YL27
OTU_1209	0	0	0	0	0	0	0	0	0	0	0	0	0	k__Bacteria; p__Bacteroidetes; c__Bacteroidia; o__Bacteroidales
OTU_1929	0	1	1	0	0	0	0	0	0	0	0	0	0	k__Bacteria; p__Bacteroidetes; c__Bacteroidia; o__Bacteroidales; f__Muribaculaceae; g__uncultured bacterium; s__uncultured bacterium
OTU_1314	0	0	0	0	0	0	0	0	0	0	0	0	0	k__Bacteria; p__Proteobacteria; c__Gammaproteobacteria; o__Betaproteobacteriales; f__Burkholderiaceae; g__Sutterella; s__unidentified
OTU_2179	0	0	0	0	0	0	0	0	1	0	0	0	0	k__Bacteria
OTU_981	0	0	0	0	0	0	4	0	1	0	0	0	0	k__Bacteria; p__Firmicutes; c__Clostridia; o__Clostridiales; f__Lachnospiraceae; g__uncultured; s__uncultured bacterium
OTU_2977	0	0	0	0	1	0	0	0	0	0	1	0	0	k__Bacteria; p__Acidobacteria; c__Acidobacteriia; o__Acidobacteriales; f__uncultured
OTU_1093	1	0	0	0	0	0	0	0	1	2	1	1	0	k__Bacteria; p__Proteobacteria; c__Gammaproteobacteria; o__Betaproteobacteriales; f__Nitrosomonadaceae; g__Ellin6067
OTU_2474	4	0	0	0	0	0	0	0	0	0	0	0	0	k__Bacteria; p__Bacteroidetes; c__Bacteroidia; o__Bacteroidales; f__Muribaculaceae; g__uncultured bacterium; s__uncultured bacterium
OTU_2818	0	0	0	0	0	0	0	0	0	0	0	0	1	k__Bacteria; p__Bacteroidetes; c__Bacteroidia; o__Bacteroidales
OTU_2905	0	0	0	0	0	0	0	0	1	0	0	0	0	k__Bacteria; p__Bacteroidetes; c__Bacteroidia; o__Bacteroidales; f__Muribaculaceae; g__Muribaculum; s__Parabacteroides sp. YL27
OTU_2759	0	0	0	0	0	0	0	0	2	0	0	0	0	k__Bacteria
OTU_2542	0	0	0	0	0	0	0	0	1	1	0	6	1	k__Bacteria; p__Bacteroidetes; c__Bacteroidia; o__Bacteroidales; f__Muribaculaceae; g__uncultured bacterium; s__uncultured bacterium
OTU_1924	1	0	0	0	0	0	0	0	1	1	0	1	0	k__Bacteria; p__Chloroflexi; c__OLB14
OTU_1532	1	0	2	0	0	0	0	0	0	0	0	0	1	k__Bacteria; p__Bacteroidetes; c__Bacteroidia; o__Bacteroidales; f__Muribaculaceae; g__uncultured bacterium; s__uncultured bacterium
OTU_2831	0	1	0	0	0	0	0	0	0	0	0	0	0	k__Bacteria; p__Firmicutes; c__Clostridia; o__Clostridiales; f__Lachnospiraceae; g__uncultured; s__Clostridium sp. Culture-54
OTU_1959	0	0	0	0	0	1	0	0	0	0	1	0	0	k__Bacteria; p__Bacteroidetes; c__Bacteroidia; o__Bacteroidales; f__Rikenellaceae; g__Alistipes
OTU_1531	0	0	1	0	0	0	0	0	0	1	0	0	0	k__Bacteria; p__Bacteroidetes; c__Bacteroidia; o__Bacteroidales; f__Muribaculaceae; g__uncultured bacterium; s__uncultured bacterium
OTU_881	2	2	1	0	0	0	0	0	0	3	1	3	0	k__Bacteria; p__Proteobacteria; c__Gammaproteobacteria; o__Betaproteobacteriales; f__Methylophilaceae
OTU_2292	0	0	1	0	0	0	0	0	0	0	0	0	0	k__Bacteria; p__Bacteroidetes; c__Bacteroidia; o__Bacteroidales; f__Muribaculaceae; g__uncultured bacterium; s__uncultured bacterium
OTU_2416	0	0	0	0	0	0	0	0	0	0	0	0	2	k__Bacteria
OTU_2401	0	1	0	0	0	0	0	0	0	0	0	0	0	k__Bacteria; p__Firmicutes; c__Clostridia; o__Clostridiales
OTU_2217	0	0	0	0	0	0	0	0	0	1	0	0	0	k__Bacteria; p__Firmicutes; c__Clostridia; o__Clostridiales
OTU_2926	0	1	0	0	0	0	0	0	0	1	0	0	0	k__Bacteria; p__Proteobacteria; c__Gammaproteobacteria; o__Betaproteobacteriales; f__Nitrosomonadaceae; g__966-1; s__uncultured bacterium
OTU_2285	0	0	0	0	0	0	0	0	0	1	0	0	0	k__Bacteria; p__Firmicutes; c__Clostridia; o__Clostridiales
OTU_1398	0	0	0	0	0	0	0	0	0	1	1	0	0	k__Bacteria; p__Nitrospirae; c__Nitrospira; o__Nitrospirales; f__Nitrospiraceae; g__Nitrospira; s__wastewater metagenome
OTU_2941	0	0	0	0	0	0	0	0	0	1	0	0	0	k__Bacteria; p__Bacteroidetes; c__Bacteroidia; o__Bacteroidales
OTU_2409	0	0	0	0	0	0	0	0	0	1	0	0	0	k__Bacteria
OTU_1247	0	0	0	0	0	0	0	0	0	0	1	0	0	k__Bacteria; p__Firmicutes; c__Bacilli; o__Lactobacillales; f__Lactobacillaceae; g__Lactobacillus
OTU_2419	0	0	0	0	1	0	0	0	0	2	0	0	0	k__Bacteria; p__Firmicutes; c__Bacilli; o__Lactobacillales; f__Lactobacillaceae; g__Lactobacillus
OTU_2913	0	0	0	0	0	0	0	0	0	1	0	0	0	k__Bacteria
OTU_1046	0	0	0	0	0	0	0	0	0	1	0	0	0	k__Bacteria; p__Firmicutes; c__Clostridia; o__Clostridiales; f__Clostridiales vadinBB60 group; g__uncultured bacterium; s__uncultured bacterium
OTU_743	0	0	0	0	0	0	0	0	0	0	0	0	0	k__Bacteria; p__Bacteroidetes; c__Bacteroidia; o__Chitinophagales; f__Saprospiraceae; g__uncultured
OTU_1675	1	0	1	0	0	0	0	0	0	0	0	0	3	k__Bacteria; p__Bacteroidetes; c__Bacteroidia; o__Bacteroidales; f__Muribaculaceae; g__uncultured bacterium; s__uncultured bacterium
OTU_2111	0	0	0	0	0	0	0	0	0	4	0	0	0	k__Bacteria; p__Firmicutes; c__Clostridia; o__Clostridiales; f__Lachnospiraceae
OTU_2273	0	0	0	0	0	0	0	0	0	0	0	0	0	k__Bacteria; p__Fusobacteria; c__Fusobacteriia; o__Fusobacteriales; f__Leptotrichiaceae; g__Sneathia; s__Sneathia amnii
OTU_2624	0	0	0	0	0	0	0	0	0	1	0	0	0	k__Bacteria; p__Firmicutes; c__Clostridia; o__Clostridiales; f__Lachnospiraceae
OTU_2629	0	0	0	0	0	0	0	0	0	1	0	0	0	k__Bacteria; p__Bacteroidetes; c__Bacteroidia; o__Bacteroidales
OTU_2916	0	0	0	0	0	0	0	0	0	1	0	1	0	k__Bacteria; p__Bacteroidetes; c__Bacteroidia; o__Bacteroidales; f__Muribaculaceae
OTU_2282	0	0	0	0	0	0	0	0	0	1	0	0	0	k__Bacteria
OTU_2791	0	0	0	0	0	0	0	0	0	0	0	1	0	k__Bacteria; p__Bacteroidetes; c__Bacteroidia; o__Bacteroidales; f__Muribaculaceae
OTU_2396	0	0	0	0	0	0	0	0	0	2	0	0	0	k__Bacteria; p__Firmicutes; c__Clostridia; o__Clostridiales; f__Lachnospiraceae
OTU_2808	0	0	0	0	0	0	0	0	0	2	0	0	0	k__Bacteria; p__Firmicutes; c__Clostridia; o__Clostridiales
OTU_2089	0	0	0	0	0	0	0	0	0	0	1	0	4	k__Bacteria; p__Bacteroidetes; c__Bacteroidia; o__Bacteroidales
[truncated: 767 more rows]

## Sheet: otu_table
OTU ID	model1	model2	model3	model4	model5	model6	model7	GMK1	GMK2	GMK3	GMK4	GMK5	GMK6	taxonomy
OTU_212	13	47	4	121	8	0	0	0	0	1	0	5	1	k__Bacteria; p__Proteobacteria; c__Deltaproteobacteria; o__Desulfovibrionales; f__Desulfovibrionaceae; g__uncultured; s__uncultured Desulfovibrionaceae bacterium
OTU_3	247	8	1960	374	5183	54	4	21	1337	2165	759	1897	48	k__Bacteria; p__Bacteroidetes; c__Bacteroidia; o__Bacteroidales; f__Muribaculaceae; g__uncultured bacterium; s__uncultured bacterium
OTU_6	19	134	362	21	43	39	4181	1383	507	21	257	4	3	k__Bacteria; p__Firmicutes; c__Bacilli; o__Lactobacillales; f__Lactobacillaceae; g__Lactobacillus; s__Lactobacillus reuteri
OTU_141	0	0	17	0	0	0	0	1	0	0	0	1	1	k__Bacteria; p__Firmicutes; c__Clostridia; o__Clostridiales; f__Lachnospiraceae
OTU_37	341	0	793	402	439	605	59	120	388	737	648	93	180	k__Bacteria; p__Bacteroidetes; c__Bacteroidia; o__Bacteroidales; f__Muribaculaceae; g__uncultured bacterium; s__uncultured bacterium
OTU_70	54	0	174	133	221	63	25	3	325	43	318	194	6	k__Bacteria; p__Bacteroidetes; c__Bacteroidia; o__Bacteroidales; f__Rikenellaceae; g__Alistipes; s__Faecalibacterium prausnitzii
OTU_148	88	256	4	22	7	121	0	39	17	37	16	2	2	k__Bacteria; p__Firmicutes; c__Clostridia; o__Clostridiales; f__Lachnospiraceae; g__Lachnoclostridium
OTU_23	0	0	10	0	4	5	0	0	4225	0	0	1	0	k__Bacteria; p__Bacteroidetes; c__Bacteroidia; o__Bacteroidales; f__Muribaculaceae; g__uncultured bacterium; s__uncultured bacterium
OTU_1	15	376	1096	13	133	72	11283	10707	1207	39	430	2	7	k__Bacteria; p__Firmicutes; c__Bacilli; o__Lactobacillales; f__Lactobacillaceae; g__Lactobacillus; s__Lactobacillus gasseri
OTU_15	0	0	331	0	0	0	0	0	0	361	286	2	1	k__Bacteria; p__Bacteroidetes; c__Bacteroidia; o__Bacteroidales; f__Marinifilaceae; g__Odoribacter; s__uncultured bacterium
OTU_75	442	0	853	217	668	1	209	14	422	703	703	304	158	k__Bacteria; p__Bacteroidetes; c__Bacteroidia; o__Bacteroidales; f__Muribaculaceae; g__uncultured bacterium; s__uncultured bacterium
OTU_118	16	2	23	157	63	9	96	109	292	14	106	51	12	k__Bacteria; p__Bacteroidetes; c__Bacteroidia; o__Bacteroidales; f__Prevotellaceae; g__Prevotellaceae UCG-001; s__uncultured Bacteroidales bacterium
OTU_209	7	6	10	8	9	2	42	36	31	21	12	43	10	k__Bacteria; p__Proteobacteria; c__Gammaproteobacteria; o__Enterobacteriales; f__Enterobacteriaceae; g__Klebsiella; s__Klebsiella pneumoniae
OTU_9	9	46	90	43	82	28	4589	10780	373	28	39	33	3	k__Bacteria; p__Firmicutes; c__Bacilli; o__Lactobacillales; f__Lactobacillaceae; g__Lactobacillus; s__Lactobacillus murinus
OTU_58	233	165	187	62	92	83	346	733	246	34	29	0	0	k__Bacteria; p__Bacteroidetes; c__Bacteroidia; o__Bacteroidales; f__Muribaculaceae; g__uncultured Bacteroidales bacterium; s__uncultured Bacteroidales bacterium
OTU_857	1	0	4	4	0	2	1	1	9	0	2	0	1	k__Bacteria; p__Firmicutes; c__Clostridia; o__Clostridiales; f__Lachnospiraceae
OTU_1078	0	2	43	1	14	0	0	0	47	51	68	55	86	k__Bacteria; p__Bacteroidetes; c__Bacteroidia; o__Bacteroidales; f__Muribaculaceae; g__uncultured bacterium; s__uncultured bacterium
OTU_1277	21	0	45	9	27	41	0	1	18	12	23	15	0	k__Bacteria; p__Bacteroidetes; c__Bacteroidia; o__Bacteroidales; f__Rikenellaceae; g__Alistipes; s__uncultured bacterium
OTU_22	15	115	161	0	65	62	3112	4960	425	72	52	30	9	k__Bacteria; p__Patescibacteria; c__Saccharimonadia; o__Saccharimonadales; f__Saccharimonadaceae; g__Candidatus Saccharimonas; s__uncultured bacterium
OTU_65	126	0	341	92	119	231	16	63	604	148	522	123	58	k__Bacteria; p__Bacteroidetes; c__Bacteroidia; o__Bacteroidales; f__Muribaculaceae; g__uncultured bacterium; s__uncultured bacterium
OTU_606	0	0	1	0	0	0	0	0	0	0	3	0	0	k__Bacteria; p__Firmicutes; c__Clostridia; o__Clostridiales; f__Lachnospiraceae; g__Lachnospiraceae NK4A136 group; s__uncultured bacterium
OTU_14	279	55	585	1227	340	5302	1	42	449	783	297	486	91	k__Bacteria; p__Bacteroidetes; c__Bacteroidia; o__Bacteroidales; f__Rikenellaceae; g__Alistipes; s__uncultured bacterium
OTU_107	229	1	356	12	0	63	0	1	1	121	0	0	0	k__Bacteria; p__Firmicutes; c__Clostridia; o__Clostridiales; f__Ruminococcaceae; g__Ruminococcaceae UCG-010
OTU_124	6	0	2	5	82	0	26	0	776	0	0	0	0	k__Bacteria; p__Actinobacteria; c__Coriobacteriia; o__Coriobacteriales; f__Atopobiaceae; g__Coriobacteriaceae UCG-002; s__uncultured bacterium
OTU_29	0	0	131	0	0	0	1	0	142	0	1	0	1	k__Bacteria; p__Bacteroidetes; c__Bacteroidia; o__Bacteroidales; f__Muribaculaceae; g__uncultured bacterium; s__uncultured bacterium
OTU_79	311	28	40	59	48	1	188	107	391	68	75	52	1	k__Bacteria; p__Bacteroidetes; c__Bacteroidia; o__Bacteroidales; f__Muribaculaceae; g__uncultured bacterium; s__uncultured bacterium
OTU_131	0	0	13	0	83	2	1	1	36	0	0	0	0	k__Bacteria; p__Actinobacteria; c__Actinobacteria; o__Bifidobacteriales; f__Bifidobacteriaceae; g__Bifidobacterium; s__uncultured bacterium
OTU_43	27	1	380	2	235	9	45	29	35	4	2	1	2	k__Bacteria; p__Firmicutes; c__Clostridia; o__Clostridiales; f__Peptostreptococcaceae; g__Romboutsia; s__uncultured bacterium
OTU_40	115	92	145	1126	36	399	0	0	5	161	47	29	10	k__Bacteria; p__Bacteroidetes; c__Bacteroidia; o__Bacteroidales; f__Rikenellaceae; g__Alistipes
OTU_105	48	229	38	115	69	220	44	11	364	90	58	94	27	k__Bacteria; p__Firmicutes; c__Clostridia; o__Clostridiales; f__Ruminococcaceae; g__Ruminiclostridium 9; s__uncultured bacterium
OTU_8	6235	2	4662	5	6284	0	29	1027	2710	1255	16907	2813	758	k__Bacteria; p__Bacteroidetes; c__Bacteroidia; o__Bacteroidales; f__Muribaculaceae; g__uncultured bacterium; s__uncultured bacterium
OTU_59	0	1	1	1	0	1	454	177	1	0	0	0	2	k__Bacteria; p__Bacteroidetes; c__Bacteroidia; o__Bacteroidales; f__Muribaculaceae; g__uncultured bacterium; s__uncultured bacterium
OTU_419	5	0	11	2	5	15	0	1	24	0	0	0	0	k__Bacteria; p__Firmicutes; c__Clostridia; o__Clostridiales; f__Ruminococcaceae
OTU_67	31	1872	80	1075	57	1157	197	42	85	338	156	43	184	k__Bacteria; p__Firmicutes; c__Clostridia; o__Clostridiales; f__Ruminococcaceae
OTU_4	194	34	267	13187	96	41	849	72	1062	667	67	1206	4438	k__Bacteria; p__Bacteroidetes; c__Bacteroidia; o__Bacteroidales; f__Prevotellaceae; g__Alloprevotella; s__uncultured Bacteroidales bacterium
OTU_1143	0	657	13	0	0	352	85	0	0	41	1	12	15	k__Bacteria; p__Firmicutes; c__Clostridia; o__Clostridiales; f__Ruminococcaceae
OTU_19	14	11302	994	103	491	27	320	70	679	1688	3621	1311	1432	k__Bacteria; p__Bacteroidetes; c__Bacteroidia; o__Bacteroidales; f__Muribaculaceae; g__uncultured bacterium; s__uncultured bacterium
OTU_41	3	0	288	0	140	0	24	0	145	0	0	0	0	k__Bacteria; p__Firmicutes; c__Erysipelotrichia; o__Erysipelotrichales; f__Erysipelotrichaceae; g__Faecalibaculum; s__uncultured bacterium
OTU_2243	1	419	5	31	8	92	9	21	0	26	17	14	13	k__Bacteria; p__Firmicutes; c__Clostridia; o__Clostridiales; f__Ruminococcaceae
OTU_679	0	68	4	0	0	6	0	1	0	1	0	0	0	k__Bacteria; p__Firmicutes; c__Clostridia; o__Clostridiales; f__Lachnospiraceae
OTU_123	4	627	4	227	7	122	254	1	71	34	8	9	8	k__Bacteria; p__Firmicutes; c__Clostridia; o__Clostridiales; f__Ruminococcaceae; g__Oscillibacter; s__uncultured bacterium
OTU_63	676	1428	897	47	161	206	30	51	537	189	35	110	100	k__Bacteria; p__Bacteroidetes; c__Bacteroidia; o__Bacteroidales; f__Muribaculaceae; g__uncultured bacterium; s__uncultured bacterium
OTU_5	330	572	785	2460	1391	1615	5254	587	567	2367	959	999	59	k__Bacteria; p__Bacteroidetes; c__Bacteroidia; o__Bacteroidales; f__Bacteroidaceae; g__Bacteroides
OTU_89	30	29	148	398	277	59	6	28	75	170	523	96	28	k__Bacteria; p__Bacteroidetes; c__Bacteroidia; o__Bacteroidales; f__Muribaculaceae; g__uncultured bacterium; s__uncultured bacterium
OTU_34	13	206	9	37	10	211	92	42	0	61	21	0	66	k__Bacteria; p__Firmicutes; c__Clostridia; o__Clostridiales; f__Lachnospiraceae; g__uncultured
OTU_375	1	4	4	0	2	17	0	0	9	0	7	1	4	k__Bacteria; p__Firmicutes; c__Clostridia; o__Clostridiales; f__Ruminococcaceae; g__GCA-900066225
OTU_158	2	5	7	120	41	17	0	1	7	0	0	1	1	k__Bacteria; p__Proteobacteria; c__Deltaproteobacteria; o__Desulfovibrionales; f__Desulfovibrionaceae; g__Bilophila; s__uncultured bacterium
OTU_84	17	337	18	1110	7	123	579	140	29	146	15	51	39	k__Bacteria; p__Firmicutes; c__Clostridia; o__Clostridiales; f__Lachnospiraceae; g__Lachnoclostridium; s__uncultured bacterium
OTU_72	187	2228	497	48	311	149	84	105	109	26	179	26	1	k__Bacteria; p__Bacteroidetes; c__Bacteroidia; o__Bacteroidales; f__Muribaculaceae
OTU_16	195	3102	636	325	63	37	1	266	504	301	688	20	26	k__Bacteria; p__Bacteroidetes; c__Bacteroidia; o__Bacteroidales; f__Muribaculaceae; g__uncultured bacterium; s__uncultured bacterium
OTU_1347	0	1	0	0	0	10	0	0	0	2	0	0	0	k__Bacteria; p__Firmicutes; c__Clostridia; o__Clostridiales
OTU_2684	0	64	2	1	2	94	284	2	3	12	32	96	35	k__Bacteria; p__Firmicutes; c__Clostridia; o__Clostridiales; f__Ruminococcaceae; g__Ruminiclostridium 9; s__uncultured bacterium
OTU_609	1	39	48	2	1	33	13	7	0	1	0	1	10	k__Bacteria; p__Firmicutes; c__Clostridia; o__Clostridiales; f__Lachnospiraceae; g__Lachnospiraceae NK4A136 group; s__uncultured bacterium
OTU_1983	0	0	10	0	3	6	0	0	0	1	0	0	0	k__Bacteria; p__Bacteroidetes; c__Bacteroidia; o__Bacteroidales
OTU_269	2	3	0	0	1	2	0	0	2	0	0	0	0	k__Bacteria; p__Firmicutes; c__Clostridia; o__Clostridiales; f__Ruminococcaceae; g__Ruminiclostridium 6; s__uncultured bacterium
OTU_28	3	6	20	6	1	4	104	14	28	2	0	0	1	k__Bacteria; p__Firmicutes; c__Bacilli; o__Lactobacillales; f__Lactobacillaceae; g__Lactobacillus
OTU_88	138	520	175	12	33	56	179	15	169	66	41	48	25	k__Bacteria; p__Bacteroidetes; c__Bacteroidia; o__Bacteroidales; f__Muribaculaceae
OTU_149	0	0	6	0	0	0	0	23	10	3	0	0	3	k__Bacteria; p__Firmicutes; c__Clostridia; o__Clostridiales; f__Ruminococcaceae
OTU_76	10	155	31	0	6	141	2	27	303	96	6	1	4	k__Bacteria; p__Firmicutes; c__Clostridia; o__Clostridiales; f__Lachnospiraceae; g__Lachnospiraceae NK4A136 group
OTU_384	0	0	0	0	0	1	0	0	490	0	1	0	1	k__Bacteria; p__Bacteroidetes; c__Bacteroidia; o__Bacteroidales; f__Muribaculaceae; g__uncultured bacterium; s__uncultured bacterium
OTU_1641	0	0	2	0	0	0	0	0	11	0	0	0	0	k__Bacteria; p__Bacteroidetes; c__Bacteroidia; o__Bacteroidales
OTU_95	0	646	15	161	13	165	278	29	7	156	21	7	98	k__Bacteria; p__Firmicutes; c__Clostridia; o__Clostridiales; f__Ruminococcaceae; g__Oscillibacter; s__unidentified
OTU_210	19	32	19	13	2	3	9	20	3	7	14	26	23	k__Bacteria; p__Proteobacteria; c__Gammaproteobacteria; o__Pseudomonadales; f__Pseudomonadaceae; g__Pseudomonas; s__Pseudomonas fluorescens
OTU_987	0	2	1	1	0	0	0	0	0	0	0	0	0	k__Bacteria; p__Firmicutes; c__Clostridia; o__Clostridiales; f__Lachnospiraceae
OTU_285	0	25	0	0	0	34	0	3	0	0	1	0	1	k__Bacteria; p__Firmicutes; c__Clostridia; o__Clostridiales; f__Ruminococcaceae; g__UBA1819; s__uncultured bacterium
OTU_1541	0	2	0	0	1	0	40	48	14	7	0	0	0	k__Bacteria; p__Bacteroidetes; c__Bacteroidia; o__Bacteroidales; f__Muribaculaceae; g__uncultured Bacteroidales bacterium; s__uncultured Bacteroidales bacterium
OTU_53	96	86	3	547	8	82	698	8	57	21	9	2	20	k__Bacteria; p__Firmicutes; c__Clostridia; o__Clostridiales; f__Lachnospiraceae
OTU_73	0	0	0	0	0	0	0	3	565	167	416	38	17	k__Bacteria; p__Bacteroidetes; c__Bacteroidia; o__Bacteroidales; f__Marinifilaceae; g__Odoribacter; s__uncultured bacterium
OTU_543	8	23	2	1	2	1	0	1	5	2	2	0	4	k__Bacteria; p__Bacteroidetes; c__Bacteroidia; o__Bacteroidales; f__Prevotellaceae; g__Prevotella; s__Chlamydia trachomatis
OTU_197	2	8	41	1	10	37	1	82	5	3	6	2	3	k__Bacteria; p__Firmicutes; c__Clostridia; o__Clostridiales; f__Lachnospiraceae; g__[Eubacterium] xylanophilum group; s__uncultured bacterium
OTU_152	1	1	4	0	0	43	25	14	1	0	1	0	2	k__Bacteria; p__Firmicutes; c__Clostridia; o__Clostridiales; f__Lachnospiraceae
OTU_31	316	204	357	154	538	193	476	1075	851	216	186	189	6	k__Bacteria; p__Bacteroidetes; c__Bacteroidia; o__Bacteroidales; f__Muribaculaceae; g__uncultured bacterium; s__uncultured bacterium
OTU_98	23	145	5	403	16	100	125	5	117	77	18	5	9	k__Bacteria; p__Firmicutes; c__Clostridia; o__Clostridiales; f__Peptococcaceae; g__uncultured; s__uncultured bacterium
OTU_154	64	111	39	5	25	40	0	1	49	204	39	29	0	k__Bacteria; p__Bacteroidetes; c__Bacteroidia; o__Bacteroidales; f__Muribaculaceae; g__uncultured bacterium; s__uncultured bacterium
OTU_910	2	3	10	3	11	7	0	5	115	26	1	112	1	k__Bacteria; p__Firmicutes; c__Clostridia; o__Clostridiales; f__Ruminococcaceae; g__Ruminiclostridium 9; s__uncultured bacterium
OTU_2	1693	763	677	8289	1791	3361	79	53	106	5256	2039	675	77	k__Bacteria; p__Bacteroidetes; c__Bacteroidia; o__Bacteroidales; f__Bacteroidaceae; g__Bacteroides; s__Bacteroides acidifaciens
OTU_51	0	121	237	119	2222	28	1	83	1	2	160	23	35	k__Bacteria; p__Firmicutes; c__Erysipelotrichia; o__Erysipelotrichales; f__Erysipelotrichaceae; g__uncultured; s__uncultured bacterium
OTU_161	31	5	32	0	72	42	0	5	123	6	0	3	1	k__Bacteria; p__Firmicutes; c__Clostridia; o__Clostridiales; f__Ruminococcaceae; g__Ruminococcaceae UCG-010
OTU_253	0	0	4	1	0	8	109	10	0	0	0	0	0	k__Bacteria; p__Bacteroidetes; c__Bacteroidia; o__Bacteroidales; f__Prevotellaceae
OTU_1444	59	10	2	1	3	0	0	0	11	1	5	5	0	k__Bacteria; p__Bacteroidetes; c__Bacteroidia; o__Bacteroidales; f__Muribaculaceae; g__uncultured bacterium; s__uncultured bacterium
OTU_135	52	190	5	7	14	71	10	5	183	6	2	2	0	k__Bacteria; p__Firmicutes; c__Clostridia; o__Clostridiales; f__Lachnospiraceae
OTU_153	0	58	58	0	1	65	145	184	0	1	0	0	2	k__Bacteria; p__Firmicutes; c__Clostridia; o__Clostridiales; f__Lachnospiraceae; g__Lachnospiraceae NK4A136 group; s__uncultured bacterium
OTU_42	0	29	14	1	0	6	0	17	3	0	0	0	1	k__Bacteria; p__Firmicutes; c__Clostridia; o__Clostridiales; f__Lachnospiraceae
OTU_54	15	92	45	77	14	10	78	340	246	27	34	27	2	k__Bacteria; p__Actinobacteria; c__Coriobacteriia; o__Coriobacteriales; f__Eggerthellaceae; g__Enterorhabdus; s__uncultured bacterium
OTU_477	3	0	10	0	0	2	572	6	0	0	0	1	1	k__Bacteria; p__Firmicutes; c__Clostridia; o__Clostridiales; f__Lachnospiraceae
OTU_159	77	0	32	166	32	85	1	3	13	11	24	1	10	k__Bacteria; p__Bacteroidetes; c__Bacteroidia; o__Bacteroidales; f__Rikenellaceae; g__Alistipes; s__uncultured bacterium
OTU_122	3	24	2	475	6	83	9	8	109	46	1	1	11	k__Bacteria; p__Firmicutes; c__Clostridia; o__Clostridiales; f__Lachnospiraceae
OTU_222	0	96	1	12	3	115	1	4	4	26	20	13	23	k__Bacteria; p__Firmicutes; c__Clostridia; o__Clostridiales; f__Ruminococcaceae; g__Ruminococcaceae UCG-004; s__uncultured bacterium
OTU_200	0	0	6	0	0	0	0	0	1	0	0	0	0	k__Bacteria; p__Bacteroidetes; c__Bacteroidia; o__Bacteroidales; f__Muribaculaceae; g__mouse gut metagenome; s__mouse gut metagenome
OTU_185	3	16	4	0	2	11	1	17	2	3	1	0	0	k__Bacteria; p__Firmicutes; c__Clostridia; o__Clostridiales; f__Lachnospiraceae
OTU_1957	0	81	16	3	26	64	268	4	12	4	5	0	6	k__Bacteria; p__Firmicutes; c__Clostridia; o__Clostridiales; f__Ruminococcaceae; g__Ruminiclostridium 5
OTU_1653	5	19	4	9	17	19	6	3	34	9	8	3	5	k__Bacteria; p__Firmicutes; c__Clostridia; o__Clostridiales; f__Ruminococcaceae
OTU_164	10	9	1	3	2	4	35	8	4	3	12	1	3	k__Bacteria; p__Actinobacteria; c__Actinobacteria; o__Bifidobacteriales; f__Bifidobacteriaceae; g__Bifidobacterium; s__unidentified
OTU_44	20	930	40	176	114	128	0	0	10	282	4	50	48	k__Bacteria; p__Epsilonbacteraeota; c__Campylobacteria; o__Campylobacterales; f__Helicobacteraceae; g__Helicobacter; s__uncultured bacterium
OTU_47	115	0	113	1010	191	128	627	263	68	189	125	56	84	k__Bacteria; p__Bacteroidetes; c__Bacteroidia; o__Bacteroidales; f__Bacteroidaceae; g__Bacteroides; s__Bacteroides caecimuris
OTU_380	0	0	0	0	0	0	0	3	5	0	0	0	0	k__Bacteria; p__Actinobacteria; c__Coriobacteriia; o__Coriobacteriales; f__Atopobiaceae; g__Coriobacteriaceae UCG-002; s__uncultured bacterium
OTU_1412	0	0	0	0	0	0	0	0	4	0	0	0	0	k__Bacteria; p__Firmicutes; c__Bacilli; o__Bacillales; f__Staphylococcaceae; g__Jeotgalicoccus; s__uncultured bacterium
OTU_183	0	0	15	0	5	0	0	0	15	0	0	0	0	k__Bacteria; p__Bacteroidetes; c__Bacteroidia; o__Bacteroidales; f__Marinifilaceae; g__Butyricimonas; s__uncultured organism
OTU_112	22	0	12	0	1	0	0	0	1085	0	0	0	3	k__Bacteria; p__Tenericutes; c__Mollicutes; o__Anaeroplasmatales; f__Anaeroplasmataceae; g__Anaeroplasma; s__uncultured bacterium
OTU_121	43	32	10	17	21	41	25	14	20	18	23	31	19	k__Bacteria; p__Actinobacteria; c__Actinobacteria; o__Bifidobacteriales; f__Bifidobacteriaceae; g__Bifidobacterium; s__Bifidobacterium breve
OTU_303	0	19	7	3	12	6	1	0	8	3	10	0	0	k__Bacteria; p__Firmicutes; c__Clostridia; o__Clostridiales; f__Peptococcaceae; g__uncultured; s__uncultured bacterium
OTU_793	0	83	13	206	168	25	4	9	1	4	33	107	21	k__Bacteria; p__Firmicutes; c__Clostridia; o__Clostridiales; f__Ruminococcaceae
OTU_274	0	44	26	6	13	14	42	1	2	5	1	4	1	k__Bacteria; p__Firmicutes; c__Clostridia; o__Clostridiales; f__Clostridiales vadinBB60 group; g__uncultured bacterium; s__uncultured bacterium
OTU_612	3	0	0	0	6	0	0	0	3	0	0	0	0	k__Bacteria; p__Bacteroidetes; c__Bacteroidia; o__Bacteroidales; f__Muribaculaceae; g__uncultured bacterium; s__uncultured bacterium
OTU_108	5	8	15	3	102	71	458	53	11	32	39	1	7	k__Bacteria; p__Firmicutes; c__Clostridia; o__Clostridiales; f__Lachnospiraceae; g__Lachnospiraceae NK4A136 group
OTU_282	0	11	9	1	0	14	0	49	0	0	0	0	0	k__Bacteria; p__Firmicutes; c__Clostridia; o__Clostridiales; f__Lachnospiraceae
OTU_664	0	1	3	0	0	2	0	2	1	1	1	0	0	k__Bacteria; p__Firmicutes; c__Clostridia; o__Clostridiales; f__Peptococcaceae; g__uncultured
OTU_56	8	1	0	0	2	0	0	0	670	0	0	0	0	k__Bacteria; p__Firmicutes; c__Clostridia; o__Clostridiales; f__Ruminococcaceae
OTU_17	461	160	435	1337	65	1586	9	0	255	814	336	321	644	k__Bacteria; p__Bacteroidetes; c__Bacteroidia; o__Bacteroidales; f__Rikenellaceae; g__Alistipes; s__uncultured bacterium
OTU_594	0	81	2	47	3	74	1	0	22	23	16	17	19	k__Bacteria; p__Firmicutes; c__Clostridia; o__Clostridiales; f__Ruminococcaceae; g__Oscillibacter; s__uncultured bacterium
OTU_32	1232	258	1014	348	1013	95	592	357	891	237	622	357	189	k__Bacteria; p__Bacteroidetes; c__Bacteroidia; o__Bacteroidales; f__Muribaculaceae
OTU_2894	0	0	0	0	0	0	0	0	0	0	0	0	0	k__Bacteria; p__Bacteroidetes; c__Bacteroidia; o__Bacteroidales; f__Muribaculaceae; g__uncultured bacterium; s__uncultured bacterium
OTU_234	0	0	18	0	43	0	0	0	21	7	23	35	7	k__Bacteria; p__Bacteroidetes; c__Bacteroidia; o__Bacteroidales; f__Rikenellaceae; g__Alistipes; s__Alistipes indistinctus YIT 12060
OTU_339	0	0	0	0	3	0	0	1	14	10	67	0	0	k__Bacteria; p__Bacteroidetes; c__Bacteroidia; o__Bacteroidales; f__Rikenellaceae; g__Alistipes
OTU_271	0	38	8	0	6	230	1	1	0	5	4	0	0	k__Bacteria; p__Firmicutes; c__Clostridia; o__Clostridiales; f__Clostridiales vadinBB60 group; g__uncultured bacterium; s__uncultured bacterium
OTU_2787	0	0	0	0	0	0	0	0	0	0	0	0	0	k__Bacteria; p__Firmicutes; c__Clostridia; o__Clostridiales; f__Lachnospiraceae
OTU_638	0	0	1	0	0	1	1	5	23	0	0	0	0	k__Bacteria; p__Actinobacteria; c__Actinobacteria; o__Corynebacteriales; f__Corynebacteriaceae; g__Corynebacterium 1; s__Corynebacterium glutamicum
OTU_106	0	0	0	1	1	21	0	0	1	2	10	22	16	k__Bacteria; p__Bacteroidetes; c__Bacteroidia; o__Bacteroidales; f__Prevotellaceae; g__Prevotella 9; s__uncultured bacterium
OTU_103	0	0	1	0	0	0	7	48	30	0	1	0	0	k__Bacteria; p__Firmicutes; c__Erysipelotrichia; o__Erysipelotrichales; f__Erysipelotrichaceae; g__Turicibacter; s__uncultured bacterium
OTU_176	1	0	16	0	34	0	7	39	5	36	12	48	2	k__Bacteria; p__Firmicutes; c__Clostridia; o__Clostridiales; f__Ruminococcaceae; g__Ruminococcaceae UCG-013
OTU_100	7	0	88	0	62	3	4	4	186	0	0	0	0	k__Bacteria; p__Firmicutes; c__Clostridia; o__Clostridiales; f__Clostridiaceae 1; g__Clostridium sensu stricto 1; s__uncultured bacterium
OTU_416	2	4	1	0	0	0	0	0	5	6	1	5	5	k__Bacteria; p__Epsilonbacteraeota; c__Campylobacteria; o__Campylobacterales; f__Campylobacteraceae; g__Campylobacter; s__Campylobacter ureolyticus ACS-301-V-Sch3b
OTU_2662	0	0	0	0	0	0	0	0	0	0	0	0	0	k__Bacteria; p__Bacteroidetes; c__Bacteroidia; o__Bacteroidales; f__Muribaculaceae
OTU_146	7	9	2	0	0	0	0	5	2	3	3	0	4	k__Bacteria; p__Bacteroidetes; c__Bacteroidia; o__Bacteroidales; f__Bacteroidaceae; g__Bacteroides; s__human gut metagenome
OTU_143	5	228	15	1055	36	86	10	6	38	104	19	7	14	k__Bacteria; p__Firmicutes; c__Clostridia; o__Clostridiales; f__Ruminococcaceae; g__Oscillibacter; s__uncultured bacterium
OTU_900	9	945	9	27	9	142	29	7	90	73	4	63	33	k__Bacteria; p__Firmicutes; c__Clostridia; o__Clostridiales; f__Ruminococcaceae; g__Ruminiclostridium; s__uncultured bacterium
OTU_449	1	0	0	0	0	24	2	0	0	0	0	0	1	k__Bacteria; p__Firmicutes; c__Clostridia; o__Clostridiales; f__Family XIII; g__Anaerovorax; s__uncultured bacterium
OTU_52	43	806	1368	28	2892	47	468	186	17	9	324	18	1	k__Bacteria; p__Bacteroidetes; c__Bacteroidia; o__Bacteroidales; f__Muribaculaceae; g__uncultured bacterium; s__uncultured bacterium
OTU_2039	0	0	2	0	0	0	0	0	0	0	0	0	0	k__Bacteria; p__Bacteroidetes; c__Bacteroidia; o__Bacteroidales; f__Muribaculaceae; g__uncultured bacterium; s__uncultured bacterium
OTU_13	19	0	413	374	179	414	193	135	2308	2438	1289	2137	973	k__Bacteria; p__Bacteroidetes; c__Bacteroidia; o__Bacteroidales; f__Rikenellaceae; g__Rikenellaceae RC9 gut group; s__uncultured bacterium
OTU_386	3	5	20	3	5	14	1	20	0	9	8	12	0	k__Bacteria; p__Bacteroidetes; c__Bacteroidia; o__Bacteroidales; f__Muribaculaceae; g__uncultured bacterium; s__uncultured bacterium
OTU_165	7	8	38	10	34	30	40	20	23	27	19	28	8	k__Bacteria; p__Actinobacteria; c__Actinobacteria; o__Corynebacteriales; f__Corynebacteriaceae; g__Corynebacterium 1; s__uncultured Corynebacterium sp.
OTU_201	0	0	3	0	0	6	0	0	0	0	0	0	0	k__Bacteria; p__Firmicutes; c__Clostridia; o__Clostridiales; f__Lachnospiraceae; g__uncultured; s__uncultured bacterium
OTU_139	10	421	16	193	11	214	115	9	144	21	27	30	21	k__Bacteria; p__Firmicutes; c__Clostridia; o__Clostridiales; f__Ruminococcaceae
OTU_408	0	0	3	0	0	0	0	9	0	4	0	4	0	k__Bacteria; p__Firmicutes; c__Clostridia; o__Clostridiales; f__Lachnospiraceae
OTU_1566	0	0	0	0	0	0	0	0	4	0	0	0	0	k__Bacteria; p__Bacteroidetes; c__Bacteroidia; o__Bacteroidales; f__Muribaculaceae; g__uncultured bacterium; s__uncultured bacterium
OTU_214	1	4	30	0	8	95	0	16	0	1	4	2	0	k__Bacteria; p__Firmicutes; c__Clostridia; o__Clostridiales; f__Lachnospiraceae; g__Lachnospiraceae NK4A136 group; s__Lachnospiraceae bacterium COE1
OTU_898	0	10	1	0	3	0	0	0	11	7	1	1	1	k__Bacteria; p__Bacteroidetes; c__Bacteroidia; o__Bacteroidales; f__Muribaculaceae; g__uncultured bacterium; s__uncultured bacterium
OTU_191	0	0	0	19	0	0	0	0	354	7	1	0	22	k__Bacteria; p__Proteobacteria; c__Alphaproteobacteria; o__Rhodospirillales; f__uncultured; g__gut metagenome; s__gut metagenome
OTU_1785	9	0	19	4	8	6	0	1	11	9	9	3	2	k__Bacteria; p__Bacteroidetes; c__Bacteroidia; o__Bacteroidales; f__Muribaculaceae; g__uncultured bacterium; s__uncultured bacterium
OTU_20	2	14	0	16	3	3	478	192	12	0	2	0	0	k__Bacteria; p__Bacteroidetes; c__Bacteroidia; o__Flavobacteriales; f__Flavobacteriaceae; g__Flavobacterium
OTU_64	0	2	51	0	1	947	1	0	1	31	1	2	119	k__Bacteria; p__Firmicutes; c__Clostridia; o__Clostridiales; f__Ruminococcaceae; g__Ruminiclostridium; s__uncultured bacterium
OTU_203	25	111	68	4	8	36	31	826	73	14	0	5	11	k__Bacteria; p__Firmicutes; c__Clostridia; o__Clostridiales; f__Ruminococcaceae; g__Ruminococcaceae UCG-014
OTU_265	1	23	7	5	0	18	66	1	0	3	3	1	5	k__Bacteria; p__Firmicutes; c__Clostridia; o__Clostridiales; f__Lachnospiraceae; g__uncultured; s__Clostridium sp. Culture-54
OTU_660	3	82	10	24	14	22	73	17	13	14	3	4	9	k__Bacteria; p__Firmicutes; c__Clostridia; o__Clostridiales; f__Lachnospiraceae; g__GCA-900066575; s__uncultured bacterium
OTU_584	2	0	14	0	17	0	0	0	28	0	0	0	0	k__Bacteria; p__Firmicutes; c__Clostridia; o__Clostridiales; f__Ruminococcaceae; g__Ruminiclostridium 1
OTU_151	1	0	11	0	0	3	24	10	41	1	3	1	0	k__Bacteria; p__Actinobacteria; c__Coriobacteriia; o__Coriobacteriales; f__Eggerthellaceae; g__Enterorhabdus; s__uncultured bacterium
OTU_110	15	90	51	16	29	68	30	18	90	9	8	9	10	k__Bacteria; p__Firmicutes; c__Clostridia; o__Clostridiales; f__Ruminococcaceae; g__Ruminococcaceae NK4A214 group; s__uncultured bacterium
OTU_21	218	334	165	181	130	518	54	30	161	729	357	186	143	k__Bacteria; p__Bacteroidetes; c__Bacteroidia; o__Bacteroidales; f__Muribaculaceae; g__uncultured bacterium; s__uncultured bacterium
OTU_2119	0	1	0	0	0	2	0	0	1	337	2	27	2	k__Bacteria; p__Firmicutes; c__Clostridia; o__Clostridiales; f__Ruminococcaceae
OTU_888	0	1	22	4	10	11	0	0	6	0	2	3	0	k__Bacteria; p__Firmicutes; c__Clostridia; o__Clostridiales; f__Clostridiales vadinBB60 group; g__uncultured bacterium; s__uncultured bacterium
OTU_2694	0	0	0	0	0	0	0	0	1	0	0	0	1	k__Bacteria; p__Bacteroidetes; c__Bacteroidia; o__Bacteroidales
OTU_18	1	1	0	9	2	4	117	123	6	2	1	4	0	k__Bacteria; p__Proteobacteria; c__Alphaproteobacteria; o__Azospirillales; f__Azospirillaceae; g__Azospirillum
OTU_188	16	0	0	0	0	0	3	0	0	1	0	0	0	k__Bacteria; p__Bacteroidetes; c__Bacteroidia; o__Bacteroidales; f__Rikenellaceae; g__Alistipes; s__uncultured bacterium
OTU_487	0	0	0	0	1	0	0	0	0	0	0	0	0	k__Bacteria; p__Bacteroidetes; c__Bacteroidia; o__Bacteroidales; f__Muribaculaceae; g__uncultured bacterium; s__uncultured bacterium
OTU_74	65	245	9	894	35	291	86	32	6	74	14	0	4	k__Bacteria; p__Firmicutes; c__Clostridia; o__Clostridiales; f__Lachnospiraceae
OTU_55	1	850	9	5	1	2340	433	19	7	522	20	21	89	k__Bacteria; p__Firmicutes; c__Clostridia; o__Clostridiales; f__Ruminococcaceae; g__Intestinimonas; s__uncultured bacterium
OTU_109	0	5	4	3	0	5	65	443	25	0	2	4	0	k__Bacteria; p__Actinobacteria; c__Coriobacteriia; o__Coriobacteriales; f__Eggerthellaceae; g__Enterorhabdus; s__uncultured bacterium
OTU_2079	0	0	0	0	0	3	0	0	0	0	0	0	0	k__Bacteria; p__Firmicutes; c__Clostridia; o__Clostridiales; f__Lachnospiraceae
OTU_243	0	94	9	0	0	15	0	0	1	0	0	0	0	k__Bacteria; p__Firmicutes; c__Clostridia; o__Clostridiales; f__Lachnospiraceae; g__Lachnospiraceae NK4A136 group
OTU_883	0	0	0	0	1	0	2	0	0	0	0	0	0	k__Bacteria; p__Firmicutes; c__Clostridia; o__Clostridiales; f__Lachnospiraceae
OTU_33	92	14	492	618	1212	579	1406	648	147	761	724	312	155	k__Bacteria; p__Bacteroidetes; c__Bacteroidia; o__Bacteroidales; f__Muribaculaceae
OTU_12	1	4	0	21	2	4	736	343	19	1	2	1	0	k__Bacteria; p__Proteobacteria; c__Gammaproteobacteria; o__Betaproteobacteriales; f__Burkholderiaceae; g__Aquabacterium
OTU_816	0	0	7	0	1	0	0	0	29	26	15	22	2	k__Bacteria; p__Bacteroidetes; c__Bacteroidia; o__Bacteroidales; f__Muribaculaceae; g__uncultured bacterium; s__uncultured bacterium
OTU_220	0	72	5	2	0	47	72	0	0	1	0	0	2	k__Bacteria; p__Firmicutes; c__Clostridia; o__Clostridiales; f__Lachnospiraceae; g__GCA-900066575; s__uncultured bacterium
OTU_1370	2	2	2	0	0	0	0	0	0	0	0	1	1	k__Bacteria; p__Firmicutes; c__Negativicutes; o__Selenomonadales; f__Veillonellaceae; g__Negativicoccus; s__uncultured bacterium
OTU_10	1	59	8	10	2	21	362	2739	5	34	23	0	1	k__Bacteria; p__Firmicutes; c__Clostridia; o__Clostridiales; f__Clostridiaceae 1; g__Candidatus Arthromitus; s__uncultured bacterium
OTU_628	0	0	1	0	4	0	0	0	0	0	0	0	0	k__Bacteria; p__Bacteroidetes; c__Bacteroidia; o__Bacteroidales; f__Rikenellaceae; g__Alistipes; s__gut metagenome
OTU_2351	0	0	4	2	3	0	0	0	0	0	6	0	1	k__Bacteria; p__Bacteroidetes; c__Bacteroidia; o__Bacteroidales; f__Muribaculaceae; g__uncultured bacterium; s__uncultured bacterium
OTU_1951	51	23	43	5	2	41	0	0	3	7	1	19	9	k__Bacteria; p__Bacteroidetes; c__Bacteroidia; o__Bacteroidales
OTU_50	2	1234	54	18	16	360	63	3	27	792	22	20	89	k__Bacteria; p__Firmicutes; c__Clostridia; o__Clostridiales; f__Ruminococcaceae; g__Ruminiclostridium; s__uncultured bacterium
OTU_102	18	9	42	584	49	6	1	6	87	137	28	148	12	k__Bacteria; p__Firmicutes; c__Clostridia; o__Clostridiales; f__Family XIII; g__[Eubacterium] nodatum group; s__uncultured bacterium
OTU_757	18	61	24	157	16	50	19	77	2	3	25	11	0	k__Bacteria; p__Firmicutes; c__Clostridia; o__Clostridiales; f__Lachnospiraceae; g__Lachnospiraceae NK4A136 group; s__uncultured bacterium
OTU_2626	0	9	5	0	1	0	1	0	2	7	26	25	19	k__Bacteria; p__Bacteroidetes; c__Bacteroidia; o__Bacteroidales; f__Muribaculaceae; g__uncultured bacterium; s__uncultured bacterium
OTU_1486	6	0	22	2	31	1	0	0	4	28	7	2	1	k__Bacteria; p__Bacteroidetes; c__Bacteroidia; o__Bacteroidales; f__Muribaculaceae; g__uncultured bacterium; s__uncultured bacterium
OTU_489	1	2	2	2	1	56	0	0	0	0	4	0	4	k__Bacteria; p__Firmicutes; c__Clostridia; o__Clostridiales; f__Peptococcaceae; g__Peptococcus; s__uncultured organism
OTU_1825	0	31	1	2	0	0	0	0	2	2	17	2	4	k__Bacteria; p__Bacteroidetes; c__Bacteroidia; o__Bacteroidales; f__Muribaculaceae; g__uncultured bacterium; s__uncultured bacterium
OTU_1334	0	0	0	0	0	12	0	0	2	1	0	0	0	k__Bacteria; p__Firmicutes; c__Clostridia; o__Clostridiales; f__Lachnospiraceae
OTU_625	0	24	1	1	0	3	0	0	4	0	0	0	0	k__Bacteria; p__Firmicutes; c__Clostridia; o__Clostridiales; f__Clostridiales vadinBB60 group
OTU_48	0	332	26	2	1	351	86	89	0	36	4	0	8	k__Bacteria; p__Firmicutes; c__Clostridia; o__Clostridiales; f__Lachnospiraceae; g__Lachnospiraceae NK4A136 group; s__uncultured bacterium
OTU_11	4107	1306	848	1886	2388	1136	0	56	832	467	579	90	235	k__Bacteria; p__Bacteroidetes; c__Bacteroidia; o__Bacteroidales; f__Muribaculaceae; g__Muribaculum; s__uncultured bacterium
OTU_2540	0	1	1	1	0	0	0	0	1	3	0	0	1	k__Bacteria; p__Bacteroidetes; c__Bacteroidia; o__Bacteroidales; f__Prevotellaceae; g__Alloprevotella; s__uncultured Bacteroidales bacterium
OTU_773	0	1	0	3	0	11	6	0	2	6	3	0	0	k__Bacteria; p__Firmicutes; c__Clostridia; o__Clostridiales; f__Christensenellaceae; g__uncultured; s__uncultured bacterium
OTU_519	0	9	0	0	0	2	0	0	0	0	0	1	18	k__Bacteria; p__Firmicutes; c__Clostridia; o__Clostridiales; f__Ruminococcaceae; g__Ruminococcaceae UCG-014
OTU_215	0	0	0	0	0	0	0	8	17	0	1	0	8	k__Bacteria; p__Firmicutes; c__Clostridia; o__Clostridiales; f__Ruminococcaceae; g__Ruminococcus 1
OTU_114	1	12	31	5	1	29	42	28	8	80	4	0	1	k__Bacteria; p__Firmicutes; c__Clostridia; o__Clostridiales; f__Lachnospiraceae; g__Roseburia; s__uncultured bacterium
OTU_435	0	5	2	4	0	2	0	6	7	1	0	3	0	k__Bacteria; p__Firmicutes; c__Clostridia; o__Clostridiales; f__Eubacteriaceae; g__Anaerofustis; s__uncultured bacterium
OTU_39	14	0	167	584	246	452	0	6	0	79	0	42	0	k__Bacteria; p__Bacteroidetes; c__Bacteroidia; o__Bacteroidales; f__Rikenellaceae
OTU_498	0	0	0	0	0	0	0	0	0	0	0	0	0	k__Bacteria; p__Firmicutes; c__Clostridia; o__Clostridiales; f__Lachnospiraceae; g__Lachnospiraceae NK4A136 group; s__uncultured bacterium
OTU_506	12	2	8	16	7	15	3	0	21	128	28	12	14	k__Bacteria; p__Bacteroidetes; c__Bacteroidia; o__Bacteroidales; f__Bacteroidaceae; g__Bacteroides
OTU_2268	2	0	8	2	7	11	0	0	1	6	0	1	0	k__Bacteria; p__Bacteroidetes; c__Bacteroidia; o__Bacteroidales; f__Muribaculaceae; g__uncultured bacterium; s__uncultured bacterium
OTU_166	20	19	24	29	31	22	19	40	15	25	24	25	24	k__Bacteria; p__Actinobacteria; c__Actinobacteria; o__Bifidobacteriales; f__Bifidobacteriaceae; g__Bifidobacterium; s__Bifidobacterium longum subsp. longum
OTU_221	14	10	53	43	34	45	52	78	61	53	64	25	27	k__Bacteria; p__Firmicutes; c__Bacilli; o__Bacillales; f__Staphylococcaceae; g__Staphylococcus
OTU_150	0	0	1	2	0	0	32	59	4	0	10	1	0	k__Bacteria; p__Bacteroidetes; c__Bacteroidia; o__Bacteroidales; f__Prevotellaceae; g__Prevotella 2
OTU_722	0	0	4	1	1	0	0	0	0	0	0	4	0	k__Bacteria; p__Firmicutes; c__Clostridia; o__Clostridiales; f__Family XI; g__Ezakiella; s__Tissierellia bacterium S7-1-4
OTU_908	0	0	1	0	0	0	0	0	0	0	0	0	0	k__Bacteria; p__Firmicutes; c__Clostridia; o__Clostridiales; f__Ruminococcaceae
OTU_1079	0	9	10	1	3	26	29	10	8	4	2	3	4	k__Bacteria; p__Firmicutes; c__Clostridia; o__Clostridiales; f__Lachnospiraceae; g__Lachnospiraceae NK4A136 group; s__Lachnospiraceae bacterium 10-1
OTU_87	124	42	4	16	6	7	90	170	316	11	116	2	0	k__Bacteria; p__Bacteroidetes; c__Bacteroidia; o__Bacteroidales; f__Muribaculaceae; g__uncultured bacterium; s__uncultured bacterium
OTU_946	0	0	0	0	0	6	0	0	0	6	2	0	0	k__Bacteria; p__Firmicutes; c__Clostridia; o__Clostridiales; f__Clostridiales vadinBB60 group; g__uncultured bacterium; s__uncultured bacterium
OTU_83	1	12	11	0	392	78	2	0	152	5	45	13	5	k__Bacteria; p__Firmicutes; c__Clostridia; o__Clostridiales; f__Ruminococcaceae; g__Ruminococcaceae UCG-010; s__uncultured organism
OTU_2918	21	0	16	6	2	0	0	0	1	15	3	10	28	k__Bacteria; p__Bacteroidetes; c__Bacteroidia; o__Bacteroidales
OTU_985	7	51	1	0	0	10	0	1	4	0	0	0	1	k__Bacteria; p__Firmicutes; c__Clostridia; o__Clostridiales; f__Lachnospiraceae; g__Lachnospiraceae NK4A136 group; s__uncultured bacterium
OTU_7	1478	768	1738	199	431	9	6	4	3383	1332	653	2285	1199	k__Bacteria; p__Bacteroidetes; c__Bacteroidia; o__Bacteroidales; f__Muribaculaceae; g__uncultured bacterium; s__uncultured bacterium
OTU_1789	0	0	0	0	0	0	0	0	1	0	0	0	0	k__Bacteria; p__Bacteroidetes; c__Bacteroidia; o__Bacteroidales; f__Muribaculaceae
OTU_1661	1	0	0	6	0	1	0	0	0	2	7	1	0	k__Bacteria; p__Bacteroidetes; c__Bacteroidia; o__Bacteroidales; f__Muribaculaceae; g__uncultured bacterium; s__uncultured bacterium
OTU_2182	2	0	5	9	5	5	0	0	1	11	1	1	0	k__Bacteria; p__Bacteroidetes; c__Bacteroidia; o__Bacteroidales; f__Muribaculaceae; g__uncultured bacterium; s__uncultured bacterium
OTU_1332	0	0	0	0	0	0	0	1	0	0	0	0	0	k__Bacteria; p__Firmicutes; c__Erysipelotrichia; o__Erysipelotrichales; f__Erysipelotrichaceae; g__Holdemanella; s__uncultured bacterium
OTU_623	0	3	1	0	3	13	0	15	0	5	1	0	0	k__Bacteria; p__Firmicutes; c__Clostridia; o__Clostridiales; f__Lachnospiraceae; g__uncultured; s__uncultured bacterium
OTU_395	3	4	1	13	11	3	9	0	0	9	3	4	0	k__Bacteria; p__Firmicutes; c__Clostridia; o__Clostridiales; f__Ruminococcaceae; g__Anaerotruncus
OTU_295	13	7	10	138	106	0	0	0	102	2	44	18	0	k__Bacteria; p__Proteobacteria; c__Gammaproteobacteria; o__Betaproteobacteriales; f__Burkholderiaceae; g__Parasutterella; s__Burkholderiales bacterium YL45
OTU_992	1	1	0	0	0	516	0	36	0	0	0	0	0	k__Bacteria; p__Firmicutes; c__Clostridia; o__Clostridiales; f__Lachnospiraceae; g__Lachnospiraceae NK4A136 group; s__uncultured bacterium
OTU_266	0	53	0	0	0	7	0	0	0	3	0	1	1	k__Bacteria; p__Firmicutes; c__Clostridia; o__Clostridiales; f__Ruminococcaceae; g__Ruminococcaceae UCG-005; s__uncultured Clostridiales bacterium
OTU_485	0	0	0	0	0	0	29	0	0	0	0	0	0	k__Bacteria; p__Proteobacteria; c__Gammaproteobacteria; o__Xanthomonadales; f__Xanthomonadaceae; g__Pseudoxanthomonas
OTU_2057	23	96	43	0	0	4	0	0	11	5	1	7	16	k__Bacteria; p__Bacteroidetes; c__Bacteroidia; o__Bacteroidales; f__Muribaculaceae; g__uncultured bacterium; s__uncultured bacterium
OTU_558	0	2	0	3	12	4	2	0	3	6	0	0	0	k__Bacteria; p__Firmicutes; c__Clostridia; o__Clostridiales; f__Clostridiales vadinBB60 group; g__uncultured bacterium; s__uncultured bacterium
OTU_2335	2	1	4	8	6	2	0	0	3	3	9	3	0	k__Bacteria; p__Bacteroidetes; c__Bacteroidia; o__Bacteroidales; f__Muribaculaceae; g__uncultured bacterium; s__uncultured bacterium
OTU_2462	1	263	31	0	2	0	0	0	4	14	47	12	16	k__Bacteria; p__Bacteroidetes; c__Bacteroidia; o__Bacteroidales; f__Muribaculaceae; g__uncultured bacterium; s__uncultured bacterium
OTU_861	0	0	0	0	0	3	0	0	3	0	0	0	1	k__Bacteria; p__Firmicutes; c__Clostridia; o__Clostridiales; f__Lachnospiraceae
OTU_2095	0	0	0	0	0	0	0	0	1	0	0	0	0	k__Bacteria; p__Firmicutes; c__Clostridia; o__Clostridiales; f__Lachnospiraceae
OTU_308	21	22	3	0	0	0	0	1	3	2	3	8	9	k__Bacteria; p__Firmicutes; c__Clostridia; o__Clostridiales; f__Family XI; g__Ezakiella; s__Fenollaria timonensis
OTU_1556	0	0	0	0	0	0	0	0	3	0	0	0	0	k__Bacteria; p__Bacteroidetes; c__Bacteroidia; o__Bacteroidales; f__Muribaculaceae; g__uncultured bacterium; s__uncultured bacterium
OTU_127	0	282	31	1	295	137	224	13	6	1	193	0	0	k__Bacteria; p__Firmicutes; c__Clostridia; o__Clostridiales; f__Lachnospiraceae; g__Blautia; s__Lachnospiraceae bacterium 615
OTU_1011	0	0	0	0	0	0	0	0	0	0	0	0	0	k__Bacteria; p__Actinobacteria; c__Coriobacteriia; o__Coriobacteriales; f__Eggerthellaceae; g__DNF00809; s__uncultured bacterium
OTU_61	5	555	3	0	26	113	0	3	1	0	0	0	0	k__Bacteria; p__Bacteroidetes; c__Bacteroidia; o__Bacteroidales; f__Rikenellaceae; g__Alistipes; s__uncultured bacterium
OTU_1411	1	10	1	9	0	4	0	0	8	6	0	1	3	k__Bacteria; p__Firmicutes; c__Clostridia; o__Clostridiales; f__Ruminococcaceae; g__Ruminiclostridium 9; s__uncultured bacterium
OTU_371	0	0	1	5	1	0	3	18	2	0	5	1	3	k__Bacteria; p__Firmicutes; c__Clostridia; o__Clostridiales; f__Ruminococcaceae; g__Subdoligranulum; s__uncultured bacterium
OTU_35	128	708	340	164	1582	56	199	134	799	445	427	996	90	k__Bacteria; p__Bacteroidetes; c__Bacteroidia; o__Bacteroidales; f__Muribaculaceae; g__uncultured bacterium; s__uncultured bacterium
OTU_373	13	2	10	4	13	2	0	0	63	0	0	1	0	k__Bacteria; p__Firmicutes; c__Clostridia; o__Clostridiales; f__Ruminococcaceae; g__Ruminococcaceae UCG-011; s__uncultured rumen bacterium
OTU_750	1	0	1	2	4	2	1	0	2	1	1	3	3	k__Bacteria; p__Firmicutes; c__Clostridia; o__Clostridiales; f__Family XI; g__Anaerococcus
OTU_71	164	96	220	211	184	103	240	105	58	52	6	25	9	k__Bacteria; p__Bacteroidetes; c__Bacteroidia; o__Bacteroidales; f__Muribaculaceae; g__uncultured bacterium; s__uncultured bacterium
OTU_1084	0	0	28	0	23	1	0	0	0	1	0	0	0	k__Bacteria; p__Bacteroidetes; c__Bacteroidia; o__Bacteroidales; f__Muribaculaceae; g__uncultured bacterium; s__uncultured bacterium
OTU_223	0	45	18	0	0	68	11	3	0	0	0	1	0	k__Bacteria; p__Firmicutes; c__Clostridia; o__Clostridiales; f__Lachnospiraceae
OTU_666	0	0	0	0	0	0	0	0	0	0	0	0	0	k__Bacteria; p__Cyanobacteria; c__Melainabacteria; o__Gastranaerophilales; f__uncultured bacterium; g__uncultured bacterium; s__uncultured bacterium
OTU_1167	11	6	15	0	0	0	0	0	1	0	0	1	0	k__Bacteria; p__Bacteroidetes; c__Bacteroidia; o__Bacteroidales; f__Muribaculaceae
OTU_239	3	19	5	123	8	25	0	0	8	0	3	2	0	k__Bacteria; p__Firmicutes; c__Clostridia; o__Clostridiales; f__Clostridiales vadinBB60 group; g__uncultured bacterium; s__uncultured bacterium
OTU_178	0	56	19	4	18	13	1	10	0	2	4	1	1	k__Bacteria; p__Firmicutes; c__Clostridia; o__Clostridiales; f__Lachnospiraceae; g__uncultured; s__Clostridium sp. Culture-27
OTU_113	35	395	52	114	1	184	28	45	64	61	5	0	5	k__Bacteria; p__Firmicutes; c__Clostridia; o__Clostridiales; f__Lachnospiraceae; g__Lachnospiraceae UCG-006; s__uncultured bacterium
OTU_330	0	5	2	2	11	48	0	22	2	166	2	0	3	k__Bacteria; p__Firmicutes; c__Clostridia; o__Clostridiales; f__Lachnospiraceae
OTU_268	2	9	2	5	0	4	78	2	0	16	1	0	0	k__Bacteria; p__Firmicutes; c__Clostridia; o__Clostridiales; f__Family XIII; g__Family XIII UCG-001; s__uncultured bacterium
OTU_848	0	0	0	0	0	0	0	0	0	0	0	0	0	k__Bacteria; p__Firmicutes; c__Bacilli; o__Lactobacillales; f__Streptococcaceae; g__Lactococcus; s__Lactococcus garvieae subsp. garvieae
OTU_2224	0	6	2	1	1	5	0	0	3	3	3	1	0	k__Bacteria; p__Firmicutes; c__Clostridia; o__Clostridiales; f__Ruminococcaceae
OTU_116	42	0	158	0	0	18	0	0	109	0	1	30	9	k__Bacteria; p__Firmicutes; c__Clostridia; o__Clostridiales; f__Ruminococcaceae; g__Ruminococcus 1
OTU_372	0	10	8	0	2	0	0	0	72	0	0	0	0	k__Bacteria; p__Firmicutes; c__Clostridia; o__Clostridiales; f__Ruminococcaceae; g__Ruminococcaceae UCG-013
OTU_1803	0	1	0	0	0	0	9	6	1	3	0	0	0	k__Bacteria; p__Firmicutes; c__Clostridia; o__Clostridiales; f__Ruminococcaceae; g__Ruminiclostridium 5
OTU_347	3	3	0	5	2	2	30	4	7	3	2	0	4	k__Bacteria; p__Firmicutes; c__Clostridia; o__Clostridiales; f__Lachnospiraceae; g__Lachnospiraceae FCS020 group; s__uncultured bacterium
OTU_2476	5	0	0	1	3	0	0	0	0	1	0	4	0	k__Bacteria; p__Bacteroidetes; c__Bacteroidia; o__Bacteroidales; f__Muribaculaceae
OTU_2187	1	0	6	0	1	7	0	0	0	0	4	0	0	k__Bacteria; p__Bacteroidetes; c__Bacteroidia; o__Bacteroidales; f__Muribaculaceae
OTU_691	1	2	1	55	1	0	18	63	23	1	0	0	0	k__Bacteria; p__Actinobacteria; c__Coriobacteriia; o__Coriobacteriales; f__Eggerthellaceae; g__Enterorhabdus; s__uncultured bacterium
OTU_964	0	0	1	0	0	23	11	13	0	0	7	1	0	k__Bacteria; p__Firmicutes; c__Clostridia; o__Clostridiales; f__Lachnospiraceae; g__Lachnospiraceae NK4A136 group; s__uncultured bacterium
OTU_24	43	55	48	92	90	133	206	95	64	143	62	83	48	k__Bacteria; p__Proteobacteria; c__Gammaproteobacteria; o__Enterobacteriales; f__Enterobacteriaceae; g__Escherichia-Shigella; s__Escherichia coli
OTU_1228	0	29	5	0	2	200	0	1	0	5	13	0	1	k__Bacteria; p__Firmicutes; c__Clostridia; o__Clostridiales; f__Ruminococcaceae; g__Intestinimonas
OTU_1213	0	5	0	0	0	1	0	0	0	1	0	0	0	k__Bacteria; p__Firmicutes; c__Clostridia; o__Clostridiales; f__Ruminococcaceae
OTU_1855	0	10	0	5	0	4	1	0	0	0	1	0	1	k__Bacteria; p__Firmicutes; c__Clostridia; o__Clostridiales
OTU_96	20	25	7	12	4	4	192	46	11	9	9	14	24	k__Bacteria; p__Firmicutes; c__Clostridia; o__Clostridiales; f__Ruminococcaceae; g__Faecalibacterium; s__uncultured bacterium
OTU_259	3	29	27	0	0	62	1	0	9	9	3	0	3	k__Bacteria; p__Firmicutes; c__Clostridia; o__Clostridiales; f__Ruminococcaceae; g__uncultured; s__unidentified
OTU_157	0	42	64	25	49	241	0	0	109	1	37	10	5	k__Bacteria; p__Firmicutes; c__Clostridia; o__Clostridiales; f__Clostridiales vadinBB60 group; g__uncultured bacterium; s__uncultured bacterium
OTU_2404	0	1	0	1	0	0	0	0	0	0	0	0	0	k__Bacteria; p__Bacteroidetes; c__Bacteroidia; o__Bacteroidales
OTU_85	0	0	0	0	1	0	649	49	0	2	19	2	0	k__Bacteria; p__Epsilonbacteraeota; c__Campylobacteria; o__Campylobacterales; f__Helicobacteraceae; g__Helicobacter
OTU_179	3	117	3	61	14	85	0	0	66	56	1	4	17	k__Bacteria; p__Firmicutes; c__Clostridia; o__Clostridiales; f__Lachnospiraceae; g__Tyzzerella; s__uncultured bacterium
OTU_1938	0	0	21	0	0	0	0	0	0	10	11	0	0	k__Bacteria; p__Bacteroidetes; c__Bacteroidia; o__Bacteroidales; f__Muribaculaceae; g__uncultured bacterium; s__uncultured bacterium
OTU_2958	0	0	0	0	0	0	0	0	0	0	0	0	0	k__Bacteria; p__Firmicutes; c__Clostridia; o__Clostridiales
OTU_2588	15	0	0	0	1	0	35	0	0	0	0	0	1	k__Bacteria; p__Firmicutes; c__Clostridia; o__Clostridiales; f__Family XIII; g__[Eubacterium] nodatum group; s__uncultured bacterium
OTU_1449	0	32	12	9	22	11	2	0	16	0	1	1	0	k__Bacteria; p__Firmicutes; c__Clostridia; o__Clostridiales; f__Clostridiales vadinBB60 group; g__uncultured bacterium; s__uncultured bacterium
OTU_104	1	160	4	1	2	32	1	6	0	0	25	1	4	k__Bacteria; p__Firmicutes; c__Clostridia; o__Clostridiales; f__Lachnospiraceae
OTU_2185	0	0	10	5	32	0	0	0	2	14	5	12	0	k__Bacteria; p__Bacteroidetes; c__Bacteroidia; o__Bacteroidales; f__Muribaculaceae; g__uncultured bacterium; s__uncultured bacterium
OTU_162	2	351	26	3	8	489	927	54	4	213	64	10	46	k__Bacteria; p__Firmicutes; c__Clostridia; o__Clostridiales; f__Ruminococcaceae
OTU_775	2	29	23	0	0	56	0	68	15	5	35	0	2	k__Bacteria; p__Firmicutes; c__Clostridia; o__Clostridiales; f__Ruminococcaceae; g__Ruminococcaceae UCG-014; s__uncultured bacterium
OTU_317	409	32	250	667	185	1842	46	11	134	289	214	173	75	k__Bacteria; p__Bacteroidetes; c__Bacteroidia; o__Bacteroidales; f__Rikenellaceae; g__Alistipes
OTU_2384	3	0	3	0	0	1	0	0	0	0	0	0	0	k__Bacteria; p__Bacteroidetes; c__Bacteroidia; o__Bacteroidales; f__Muribaculaceae; g__uncultured bacterium; s__uncultured bacterium
OTU_292	0	0	4	0	1	4	21	0	0	1	0	1	3	k__Bacteria; p__Firmicutes; c__Clostridia; o__Clostridiales; f__Ruminococcaceae; g__Ruminiclostridium 6; s__uncultured bacterium
OTU_288	0	2	2	0	2	21	115	0	0	0	0	0	5	k__Bacteria; p__Firmicutes; c__Clostridia; o__Clostridiales; f__Ruminococcaceae
OTU_204	0	37	3	1	5	9	54	1	0	0	2	0	0	k__Bacteria; p__Firmicutes; c__Clostridia; o__Clostridiales; f__Lachnospiraceae
OTU_145	22	3	8	28	16	10	15	2	335	12	13	4	9	k__Bacteria; p__Firmicutes; c__Clostridia; o__Clostridiales; f__Defluviitaleaceae; g__Defluviitaleaceae UCG-011; s__uncultured organism
OTU_740	0	4	0	7	0	0	51	12	0	2	2	1	1	k__Bacteria; p__Bacteroidetes; c__Bacteroidia; o__Bacteroidales; f__Bacteroidaceae; g__Bacteroides; s__Bacteroides ovatus V975
OTU_893	0	0	6	0	0	0	0	0	0	0	0	0	0	k__Bacteria; p__Firmicutes; c__Clostridia; o__Clostridiales; f__Ruminococcaceae; g__Ruminiclostridium; s__uncultured organism
OTU_1159	0	0	0	0	2	3	8	11	0	1	7	1	0	k__Bacteria; p__Firmicutes; c__Clostridia; o__Clostridiales; f__Lachnospiraceae; g__Lachnospiraceae NK4A136 group; s__Lachnospiraceae bacterium COE1
OTU_173	0	3	3	0	0	86	0	7	0	0	2	0	4	k__Bacteria; p__Firmicutes; c__Clostridia; o__Clostridiales; f__Lachnospiraceae; g__Roseburia
OTU_662	1	0	0	0	3	0	1	0	4	0	0	0	1	k__Bacteria; p__Firmicutes; c__Negativicutes; o__Selenomonadales; f__Veillonellaceae; g__Dialister; s__uncultured bacterium
OTU_291	0	0	0	0	0	0	0	0	2	0	18	0	0	k__Bacteria; p__Fusobacteria; c__Fusobacteriia; o__Fusobacteriales; f__Fusobacteriaceae; g__Cetobacterium; s__uncultured bacterium
OTU_370	0	3	0	1	0	1	17	9	15	5	1	0	0	k__Bacteria; p__Firmicutes; c__Clostridia; o__Clostridiales; f__Ruminococcaceae; g__Ruminiclostridium 5; s__uncultured Clostridiales bacterium
OTU_365	0	8	16	48	1	26	0	0	0	11	1	2	0	k__Bacteria; p__Firmicutes; c__Clostridia; o__Clostridiales; f__Clostridiales vadinBB60 group; g__uncultured Clostridia bacterium; s__uncultured Clostridia bacterium
OTU_1384	5	0	4	0	0	0	0	0	2	4	2	0	4	k__Bacteria; p__Bacteroidetes; c__Bacteroidia; o__Bacteroidales; f__Muribaculaceae; g__uncultured bacterium; s__uncultured bacterium
OTU_1437	0	0	0	0	0	0	0	0	2	0	0	0	0	k__Bacteria; p__Bacteroidetes; c__Bacteroidia; o__Bacteroidales
OTU_1081	0	1007	51	0	5	0	0	0	5	6	45	6	2	k__Bacteria; p__Bacteroidetes; c__Bacteroidia; o__Bacteroidales; f__Muribaculaceae; g__uncultured bacterium; s__uncultured bacterium
OTU_99	10	121	19	91	50	230	125	35	82	11	8	26	2	k__Bacteria; p__Firmicutes; c__Clostridia; o__Clostridiales; f__Lachnospiraceae; g__uncultured; s__uncultured bacterium
OTU_852	10	2	0	2	0	21	107	4	2	8	1	2	0	k__Bacteria; p__Firmicutes; c__Clostridia; o__Clostridiales; f__Lachnospiraceae
OTU_228	0	0	13	43	8	7	55	38	24	8	1	21	0	k__Bacteria; p__Firmicutes; c__Clostridia; o__Clostridiales; f__Lachnospiraceae; g__Marvinbryantia; s__Clostridiales bacterium CIEAF 012
OTU_440	7	1	0	0	0	0	0	0	156	0	0	0	0	k__Bacteria; p__Bacteroidetes; c__Bacteroidia; o__Bacteroidales; f__Muribaculaceae; g__uncultured bacterium; s__uncultured bacterium
OTU_635	0	0	0	2	0	2	0	0	2	12	0	1	0	k__Bacteria; p__Firmicutes; c__Clostridia; o__Clostridiales; f__Ruminococcaceae; g__Harryflintia; s__uncultured bacterium
OTU_796	0	0	0	0	0	0	0	0	4	0	0	1	0	k__Bacteria; p__Proteobacteria; c__Gammaproteobacteria; o__Pseudomonadales; f__Moraxellaceae; g__Acinetobacter; s__Acinetobacter lwoffii
OTU_192	4	60	0	1	1	30	0	11	8	15	1	1	4	k__Bacteria; p__Firmicutes; c__Clostridia; o__Clostridiales; f__Lachnospiraceae
OTU_198	3	113	13	30	6	60	32	0	4	33	13	0	1	k__Bacteria; p__Firmicutes; c__Clostridia; o__Clostridiales; f__Family XIII; g__[Eubacterium] brachy group; s__uncultured bacterium
OTU_2605	0	15	0	0	0	0	0	0	1	0	0	0	0	k__Bacteria; p__Firmicutes; c__Clostridia; o__Clostridiales; f__Clostridiales vadinBB60 group; g__uncultured bacterium; s__uncultured bacterium
OTU_2045	0	0	0	0	0	0	1	0	0	0	0	0	0	k__Bacteria; p__Bacteroidetes; c__Bacteroidia; o__Bacteroidales; f__Muribaculaceae; g__uncultured bacterium; s__uncultured bacterium
OTU_2783	0	0	0	0	0	0	0	0	0	0	0	0	0	k__Bacteria; p__Bacteroidetes; c__Bacteroidia; o__Bacteroidales; f__Prevotellaceae; g__Alloprevotella
OTU_1205	0	0	0	0	0	0	0	0	0	0	0	0	0	k__Bacteria; p__Bacteroidetes; c__Bacteroidia; o__Bacteroidales; f__Muribaculaceae; g__uncultured bacterium; s__uncultured bacterium
OTU_777	0	0	14	0	0	1	0	0	0	0	0	0	0	k__Bacteria; p__Firmicutes; c__Clostridia; o__Clostridiales; f__Ruminococcaceae; g__Ruminiclostridium 1; s__uncultured bacterium
OTU_1098	223	15	53	45	190	27	0	0	23	23	10	10	10	k__Bacteria; p__Bacteroidetes; c__Bacteroidia; o__Bacteroidales; f__Muribaculaceae
OTU_1985	0	0	0	0	0	0	0	0	0	1	0	0	0	k__Bacteria; p__Firmicutes; c__Clostridia; o__Clostridiales; f__Ruminococcaceae; g__Ruminiclostridium 9; s__uncultured bacterium
OTU_2577	0	0	3	0	1	2	0	0	4	0	3	0	0	k__Bacteria; p__Firmicutes; c__Clostridia; o__Clostridiales; f__Clostridiales vadinBB60 group; g__uncultured bacterium; s__uncultured bacterium
OTU_68	10	24	11	98	91	29	1886	86	38	61	16	37	24	k__Bacteria; p__Bacteroidetes; c__Bacteroidia; o__Bacteroidales; f__Bacteroidaceae; g__Bacteroides
OTU_350	5	0	8	5	4	2	31	0	10	6	0	0	0	k__Bacteria; p__Firmicutes; c__Clostridia; o__Clostridiales; f__Christensenellaceae; g__uncultured; s__uncultured bacterium
OTU_168	1	3	2	0	0	0	75	7	0	1	2	1	1	k__Bacteria; p__Firmicutes; c__Clostridia; o__Clostridiales; f__Ruminococcaceae; g__Subdoligranulum; s__uncultured bacterium
OTU_383	0	2	0	1	0	1	158	29	0	0	0	0	1	k__Bacteria; p__Bacteroidetes; c__Bacteroidia; o__Bacteroidales; f__Muribaculaceae; g__uncultured bacterium; s__uncultured bacterium
OTU_576	0	5	1	1	0	0	4	6	11	0	4	0	0	k__Bacteria; p__Actinobacteria; c__Coriobacteriia; o__Coriobacteriales; f__Eggerthellaceae
OTU_1612	0	1	1	2	1	1	0	2	1	0	0	0	0	k__Bacteria; p__Firmicutes; c__Clostridia; o__Clostridiales; f__Ruminococcaceae; g__Ruminiclostridium 9; s__gut metagenome
OTU_1302	1	73	10	11	3	11	70	0	2	12	1	4	1	k__Bacteria; p__Firmicutes; c__Clostridia; o__Clostridiales; f__Ruminococcaceae
OTU_1866	0	2	0	0	0	0	0	1	0	0	0	0	0	k__Bacteria; p__Firmicutes; c__Clostridia; o__Clostridiales; f__Lachnospiraceae; g__Lachnospiraceae NK4A136 group
OTU_38	5	10	7	0	0	0	1	2	1	3	2	0	0	k__Bacteria; p__Firmicutes; c__Negativicutes; o__Selenomonadales; f__Veillonellaceae; g__Megamonas; s__uncultured bacterium
OTU_2657	0	0	0	0	0	0	0	0	0	0	0	1	0	k__Bacteria; p__Bacteroidetes; c__Bacteroidia; o__Bacteroidales
OTU_2643	0	0	0	0	0	0	0	0	1	0	0	0	3	k__Bacteria
OTU_2345	7	0	15	0	1	2	0	0	3	2	0	0	1	k__Bacteria; p__Bacteroidetes; c__Bacteroidia; o__Bacteroidales; f__Muribaculaceae; g__uncultured bacterium; s__uncultured bacterium
OTU_997	0	0	0	0	0	0	0	0	0	0	0	0	0	k__Bacteria; p__Bacteroidetes; c__Bacteroidia; o__Bacteroidales; f__Muribaculaceae; g__uncultured bacterium; s__uncultured bacterium
OTU_589	0	2	0	18	17	43	15	4	5	11	2	1	12	k__Bacteria; p__Bacteroidetes; c__Bacteroidia; o__Bacteroidales; f__Porphyromonadaceae; g__Porphyromonas; s__Porphyromonas sp. HMSC065F10
OTU_90	19	180	35	83	10	36	43	63	418	40	321	8	9	k__Bacteria; p__Bacteroidetes; c__Bacteroidia; o__Bacteroidales; f__Muribaculaceae; g__uncultured bacterium; s__uncultured bacterium
OTU_36	0	85	1	1	11	284	45	7	308	50	828	31	195	k__Bacteria; p__Firmicutes; c__Clostridia; o__Clostridiales; f__Ruminococcaceae; g__[Eubacterium] coprostanoligenes group; s__uncultured organism
OTU_1325	0	47	11	0	2	24	0	0	24	28	4	2	4	k__Bacteria; p__Firmicutes; c__Clostridia; o__Clostridiales; f__Ruminococcaceae; g__Ruminiclostridium; s__uncultured bacterium
OTU_421	0	0	0	0	12	0	81	2	0	0	0	0	1	k__Bacteria; p__Proteobacteria; c__Gammaproteobacteria; o__Betaproteobacteriales; f__Burkholderiaceae; g__Parasutterella
OTU_181	1	233	3	0	0	82	13	23	0	21	0	0	1	k__Bacteria; p__Firmicutes; c__Clostridia; o__Clostridiales; f__Lachnospiraceae; g__Roseburia
OTU_1759	0	0	1	0	0	0	0	0	0	0	0	0	0	k__Bacteria; p__Bacteroidetes; c__Bacteroidia; o__Bacteroidales; f__Muribaculaceae; g__uncultured bacterium; s__uncultured bacterium
OTU_1216	0	4	0	0	0	0	0	0	0	0	0	0	0	k__Bacteria; p__Tenericutes; c__Mollicutes; o__Mollicutes RF39
OTU_206	2	10	0	2	3	16	351	14	0	5	1	0	1	k__Bacteria; p__Firmicutes; c__Clostridia; o__Clostridiales; f__Lachnospiraceae; g__Lachnospiraceae NK4A136 group; s__uncultured bacterium
OTU_1944	0	3	0	1	0	1	1	4	0	0	0	0	0	k__Bacteria; p__Actinobacteria; c__Coriobacteriia; o__Coriobacteriales; f__Eggerthellaceae; g__Enterorhabdus; s__uncultured bacterium
OTU_226	0	0	6	2	2	15	38	2	4	0	0	0	2	k__Bacteria; p__Firmicutes; c__Clostridia; o__Clostridiales; f__Lachnospiraceae
OTU_789	4	0	2	0	6	0	0	0	0	0	0	0	0	k__Bacteria; p__Bacteroidetes; c__Bacteroidia; o__Bacteroidales; f__Muribaculaceae; g__uncultured bacterium; s__uncultured bacterium
OTU_1552	0	0	0	0	0	1	0	0	0	0	0	0	0	k__Bacteria; p__Firmicutes; c__Clostridia; o__Clostridiales; f__Lachnospiraceae
OTU_504	71	150	21	37	80	76	13	2	5	19	17	39	10	k__Bacteria; p__Bacteroidetes; c__Bacteroidia; o__Bacteroidales; f__Rikenellaceae; g__Alistipes; s__uncultured bacterium
OTU_2944	2	0	3	2	4	0	0	0	1	0	2	0	0	k__Bacteria; p__Bacteroidetes; c__Bacteroidia; o__Bacteroidales; f__Muribaculaceae; g__uncultured bacterium; s__uncultured bacterium
OTU_144	3	40	20	2	2	5	29	157	31	1	31	6	1	k__Bacteria; p__Actinobacteria; c__Coriobacteriia; o__Coriobacteriales; f__Eggerthellaceae
OTU_49	104	173	125	186	32	198	100	37	84	411	232	93	47	k__Bacteria; p__Bacteroidetes; c__Bacteroidia; o__Bacteroidales; f__Muribaculaceae; g__uncultured bacterium; s__uncultured bacterium
OTU_194	0	1	24	7	0	1	0	0	0	0	0	255	7	k__Bacteria; p__Firmicutes; c__Erysipelotrichia; o__Erysipelotrichales; f__Erysipelotrichaceae; g__uncultured bacterium; s__uncultured bacterium
OTU_525	0	31	0	0	0	3	0	0	0	3	0	0	2	k__Bacteria; p__Firmicutes; c__Clostridia; o__Clostridiales; f__Ruminococcaceae; g__Ruminococcaceae UCG-005
OTU_346	0	0	14	3	37	2	0	2	5	0	0	1	1	k__Bacteria; p__Firmicutes; c__Erysipelotrichia; o__Erysipelotrichales; f__Erysipelotrichaceae; g__uncultured; s__uncultured bacterium
OTU_1893	0	0	0	0	0	0	0	0	0	0	0	0	0	k__Bacteria; p__Bacteroidetes; c__Bacteroidia; o__Bacteroidales; f__Muribaculaceae; g__uncultured bacterium; s__uncultured bacterium
OTU_502	0	1	0	0	0	3	0	0	0	0	0	1	2	k__Bacteria; p__Fusobacteria; c__Fusobacteriia; o__Fusobacteriales; f__Fusobacteriaceae; g__Fusobacterium; s__uncultured bacterium
OTU_500	0	0	1	0	0	0	10	1	0	0	0	0	1	k__Bacteria; p__Bacteroidetes; c__Bacteroidia; o__Bacteroidales; f__Tannerellaceae; g__Parabacteroides
OTU_1343	0	0	2	0	0	0	0	0	1	1	0	0	0	k__Bacteria; p__Bacteroidetes; c__Bacteroidia; o__Bacteroidales; f__Muribaculaceae; g__uncultured bacterium; s__uncultured bacterium
OTU_1971	2	0	0	0	0	5	0	0	0	0	0	0	0	k__Bacteria; p__Bacteroidetes; c__Bacteroidia; o__Bacteroidales; f__Muribaculaceae; g__uncultured bacterium; s__uncultured bacterium
OTU_607	0	5	5	0	0	7	0	1	1	0	0	0	0	k__Bacteria; p__Firmicutes; c__Clostridia; o__Clostridiales; f__Lachnospiraceae
OTU_1891	2	1	43	0	30	0	0	0	9	22	317	79	31	k__Bacteria; p__Bacteroidetes; c__Bacteroidia; o__Bacteroidales; f__Muribaculaceae; g__uncultured bacterium; s__uncultured bacterium
OTU_2883	0	0	0	0	0	0	0	0	0	0	0	0	0	k__Bacteria; p__Bacteroidetes; c__Bacteroidia; o__Bacteroidales; f__Prevotellaceae; g__Alloprevotella
OTU_237	1	1	1	1	1	40	1	10	6	0	0	0	1	k__Bacteria; p__Firmicutes; c__Clostridia; o__Clostridiales; f__Lachnospiraceae; g__Lachnospiraceae NK4A136 group
OTU_2251	0	0	2	0	0	0	0	0	0	0	0	3	0	k__Bacteria; p__Bacteroidetes; c__Bacteroidia; o__Bacteroidales
OTU_1070	0	0	27	0	0	91	0	0	0	2	0	0	0	k__Bacteria; p__Firmicutes; c__Clostridia; o__Clostridiales; f__Clostridiales vadinBB60 group; g__uncultured bacterium; s__uncultured bacterium
OTU_541	0	0	3	0	0	2	0	0	40	0	6	1	0	k__Bacteria; p__Firmicutes; c__Erysipelotrichia; o__Erysipelotrichales; f__Erysipelotrichaceae; g__uncultured; s__uncultured bacterium
OTU_30	0	2	0	1	1	0	215	190	4	0	0	1	0	k__Bacteria; p__Proteobacteria; c__Gammaproteobacteria; o__Betaproteobacteriales; f__Burkholderiaceae
OTU_26	0	1	6	7	7	1	1869	2461	30	4	5	0	1	k__Bacteria; p__Firmicutes; c__Bacilli; o__Lactobacillales; f__Streptococcaceae; g__Streptococcus
OTU_1020	0	0	0	0	0	0	1	0	0	0	0	0	0	k__Bacteria; p__Firmicutes; c__Clostridia; o__Clostridiales; f__Clostridiales vadinBB60 group; g__uncultured bacterium; s__uncultured bacterium
OTU_632	0	0	1	4	3	0	18	1	5	0	0	0	0	k__Bacteria; p__Bacteroidetes; c__Bacteroidia; o__Bacteroidales; f__Bacteroidaceae; g__Bacteroides
OTU_2876	0	0	0	0	0	0	0	0	0	0	0	0	0	k__Bacteria; p__Firmicutes; c__Bacilli; o__Bacillales
OTU_610	6	2	0	0	0	0	0	0	0	0	0	0	4	k__Bacteria; p__Bacteroidetes; c__Bacteroidia; o__Bacteroidales; f__Prevotellaceae; g__Prevotella 6
OTU_2761	6	3	6	0	0	1	0	0	0	1	0	0	2	k__Bacteria; p__Bacteroidetes; c__Bacteroidia; o__Bacteroidales; f__Muribaculaceae; g__uncultured bacterium; s__uncultured bacterium
OTU_792	4	1	0	0	0	1	0	1	3	2	0	0	2	k__Bacteria; p__Bacteroidetes; c__Bacteroidia; o__Bacteroidales; f__Porphyromonadaceae; g__Porphyromonas; s__unidentified
OTU_1442	0	0	3	0	0	0	0	0	0	0	0	0	0	k__Bacteria; p__Bacteroidetes; c__Bacteroidia; o__Bacteroidales; f__Prevotellaceae; g__Alloprevotella
OTU_1618	3	0	0	0	7	0	0	0	0	1	3	10	0	k__Bacteria; p__Bacteroidetes; c__Bacteroidia; o__Bacteroidales
OTU_336	2	0	6	0	2	7	0	0	3	0	4	2	1	k__Bacteria; p__Firmicutes; c__Clostridia; o__Clostridiales; f__Family XIII; g__Family XIII AD3011 group; s__uncultured bacterium
OTU_170	8	27	7	352	2	35	74	19	9	17	12	1	3	k__Bacteria; p__Firmicutes; c__Clostridia; o__Clostridiales; f__Lachnospiraceae; g__uncultured; s__uncultured bacterium
OTU_2993	1	0	1	0	0	0	0	0	0	0	0	0	0	k__Bacteria; p__Bacteroidetes; c__Bacteroidia; o__Bacteroidales; f__Muribaculaceae
OTU_701	0	0	0	0	0	8	0	0	0	0	0	0	0	k__Bacteria; p__Firmicutes; c__Clostridia; o__Clostridiales; f__Lachnospiraceae
OTU_117	1	2	0	7	2	0	14	2	2	3	6	0	1	k__Bacteria; p__Firmicutes; c__Clostridia; o__Clostridiales; f__Lachnospiraceae; g__Roseburia; s__uncultured organism
OTU_193	0	0	0	0	0	0	32	1	0	0	2	0	0	k__Bacteria; p__Proteobacteria; c__Gammaproteobacteria; o__Betaproteobacteriales; f__Burkholderiaceae
OTU_1454	0	0	0	0	0	0	0	0	0	0	0	0	0	k__Bacteria; p__Bacteroidetes; c__Bacteroidia; o__Bacteroidales; f__Muribaculaceae; g__uncultured bacterium; s__uncultured bacterium
OTU_1053	0	0	0	0	0	0	0	0	0	0	0	0	1	k__Bacteria; p__Tenericutes; c__Mollicutes; o__Mollicutes RF39
OTU_629	0	0	0	0	0	0	0	0	0	0	0	0	0	k__Bacteria; p__Tenericutes; c__Mollicutes; o__Mollicutes RF39
OTU_1305	0	139	1	0	0	55	0	4	0	2	0	1	10	k__Bacteria; p__Firmicutes; c__Clostridia; o__Clostridiales; f__Ruminococcaceae
OTU_1510	0	0	1	1	0	0	0	0	0	0	0	0	0	k__Bacteria; p__Bacteroidetes; c__Bacteroidia; o__Bacteroidales; f__Prevotellaceae; g__Alloprevotella
OTU_563	0	0	0	0	1	0	0	1	6	0	0	0	0	k__Bacteria; p__Cyanobacteria; c__Melainabacteria; o__Gastranaerophilales
OTU_2969	0	0	0	0	0	0	0	0	0	0	0	0	0	k__Bacteria; p__Firmicutes; c__Negativicutes; o__Selenomonadales; f__Veillonellaceae; g__Dialister; s__uncultured bacterium
OTU_914	0	1	0	0	1	1	0	0	0	0	0	0	0	k__Bacteria; p__Proteobacteria; c__Alphaproteobacteria; o__Rhodobacterales; f__Rhodobacteraceae; g__Paracoccus
OTU_398	2	0	0	2	0	0	11	1	1	0	0	1	2	k__Bacteria; p__Firmicutes; c__Clostridia; o__Clostridiales; f__Ruminococcaceae; g__Ruminococcaceae UCG-005; s__uncultured organism
OTU_2287	0	13	1	0	0	0	0	0	0	11	4	0	2	k__Bacteria; p__Bacteroidetes; c__Bacteroidia; o__Bacteroidales; f__Muribaculaceae; g__uncultured bacterium; s__uncultured bacterium
OTU_60	0	4	2	9	9	6	253	822	20	2	9	0	0	k__Bacteria; p__Firmicutes; c__Bacilli; o__Bacillales; f__Family XI; g__Gemella
OTU_1453	0	0	19	1	15	0	0	0	1	13	10	27	1	k__Bacteria; p__Bacteroidetes; c__Bacteroidia; o__Bacteroidales; f__Muribaculaceae; g__uncultured bacterium; s__uncultured bacterium
OTU_177	24	15	9	16	37	38	27	12	20	18	15	24	16	k__Bacteria; p__Firmicutes; c__Clostridia; o__Clostridiales; f__Family XI; g__Finegoldia; s__uncultured bacterium
OTU_130	1	48	42	0	0	55	48	6	0	0	0	32	12	k__Bacteria; p__Firmicutes; c__Clostridia; o__Clostridiales; f__Clostridiales vadinBB60 group; g__uncultured bacterium; s__uncultured bacterium
OTU_184	0	0	1	26	18	3	1	3	0	1	8	10	0	k__Bacteria; p__Firmicutes; c__Erysipelotrichia; o__Erysipelotrichales; f__Erysipelotrichaceae; g__uncultured; s__uncultured bacterium
OTU_400	0	25	0	0	0	0	2	1	0	0	0	0	0	k__Bacteria; p__Firmicutes; c__Clostridia; o__Clostridiales; f__Ruminococcaceae; g__Ruminiclostridium; s__uncultured bacterium
OTU_1524	0	0	1	0	0	1	0	0	0	0	0	1	0	k__Bacteria; p__Firmicutes; c__Clostridia; o__Clostridiales; f__Ruminococcaceae; g__Ruminiclostridium 9; s__bacterium enrichment culture clone M244
OTU_232	9	9	9	2	43	22	10	7	0	88	5	1	1	k__Bacteria; p__Firmicutes; c__Clostridia; o__Clostridiales; f__Lachnospiraceae; g__Marvinbryantia; s__uncultured bacterium
OTU_276	0	1	0	0	0	1	26	0	0	2	0	0	0	k__Bacteria; p__Firmicutes; c__Clostridia; o__Clostridiales; f__Lachnospiraceae; g__Coprococcus 3; s__uncultured bacterium
OTU_172	19	19	16	7	20	8	27	29	16	13	11	20	4	k__Bacteria; p__Firmicutes; c__Bacilli; o__Lactobacillales; f__Enterococcaceae; g__Enterococcus; s__Enterococcus faecalis
OTU_469	0	16	6	41	3	36	0	3	5	1	3	0	2	k__Bacteria; p__Firmicutes; c__Clostridia; o__Clostridiales; f__Clostridiales vadinBB60 group; g__Clostridiales bacterium enrichment culture clone 06-1235251-67; s__Clostridiales bacterium enrichment culture clone 06-1235251-67
OTU_167	21	23	6	57	5	1	0	0	9	18	28	14	0	k__Bacteria; p__Bacteroidetes; c__Bacteroidia; o__Bacteroidales; f__Tannerellaceae; g__Parabacteroides; s__Parabacteroides goldsteinii CL02T12C30
OTU_1074	0	1	1	4	1	3	44	60	6	0	1	0	0	k__Bacteria; p__Proteobacteria; c__Gammaproteobacteria; o__Betaproteobacteriales; f__Burkholderiaceae
OTU_1282	0	0	0	0	0	0	0	0	11	0	0	0	0	k__Bacteria; p__Bacteroidetes; c__Bacteroidia; o__Bacteroidales; f__Muribaculaceae; g__uncultured bacterium; s__uncultured bacterium
OTU_115	112	0	5	50	38	6	3	0	102	24	66	512	5	k__Bacteria; p__Firmicutes; c__Clostridia; o__Clostridiales; f__Family XIII; g__Family XIII AD3011 group
OTU_1164	0	25	2	0	0	46	11	2	0	7	3	0	5	k__Bacteria; p__Firmicutes; c__Clostridia; o__Clostridiales; f__Ruminococcaceae
OTU_126	2	39	4	0	1	16	0	25	27	0	1	0	1	k__Bacteria; p__Firmicutes; c__Clostridia; o__Clostridiales; f__Lachnospiraceae
OTU_1238	0	0	1	0	0	0	0	0	5	17	32	61	40	k__Bacteria; p__Bacteroidetes; c__Bacteroidia; o__Bacteroidales; f__Rikenellaceae; g__Rikenellaceae RC9 gut group; s__uncultured bacterium
OTU_246	0	0	1	97	1	0	5	0	332	0	2	16	3	k__Bacteria; p__Firmicutes; c__Erysipelotrichia; o__Erysipelotrichales; f__Erysipelotrichaceae; g__Erysipelatoclostridium; s__uncultured bacterium
OTU_2880	0	6	0	0	0	0	0	0	1	0	0	0	0	k__Bacteria; p__Bacteroidetes; c__Bacteroidia; o__Bacteroidales; f__Muribaculaceae; g__uncultured bacterium; s__uncultured bacterium
OTU_1162	1	2	0	0	3	0	23	11	3	2	6	9	1	k__Bacteria; p__Bacteroidetes; c__Bacteroidia; o__Bacteroidales; f__Rikenellaceae; g__Alistipes
OTU_334	0	0	2	10	0	4	0	0	0	0	1	0	0	k__Bacteria; p__Firmicutes; c__Clostridia; o__Clostridiales; f__Lachnospiraceae
OTU_2024	0	0	0	0	0	2	0	0	0	0	0	0	0	k__Bacteria; p__Firmicutes; c__Clostridia; o__Clostridiales; f__Lachnospiraceae
OTU_1105	18	146	28	0	4	1	0	0	1	1	1	0	0	k__Bacteria; p__Bacteroidetes; c__Bacteroidia; o__Bacteroidales; f__Muribaculaceae; g__uncultured bacterium; s__uncultured bacterium
OTU_369	0	104	10	0	0	56	4	6	36	4	0	1	0	k__Bacteria; p__Firmicutes; c__Clostridia; o__Clostridiales; f__Lachnospiraceae; g__uncultured; s__uncultured bacterium
OTU_2927	0	0	0	0	0	0	0	0	0	0	0	0	0	k__Bacteria; p__Firmicutes; c__Clostridia; o__Clostridiales; f__Ruminococcaceae
OTU_2123	0	1	0	0	0	0	0	0	0	0	0	0	0	k__Bacteria; p__Firmicutes; c__Clostridia; o__Clostridiales; f__Lachnospiraceae; g__Lachnospiraceae NK4A136 group
OTU_1943	0	0	0	1	0	12	0	0	0	0	0	0	0	k__Bacteria; p__Firmicutes; c__Clostridia; o__Clostridiales; f__Lachnospiraceae
OTU_216	0	116	0	0	0	37	26	2	1	59	0	0	0	k__Bacteria; p__Firmicutes; c__Clostridia; o__Clostridiales; f__Lachnospiraceae
OTU_1581	2	9	9	5	4	1	0	0	18	2	31	0	0	k__Bacteria; p__Bacteroidetes; c__Bacteroidia; o__Bacteroidales; f__Muribaculaceae; g__uncultured bacterium; s__uncultured bacterium
OTU_637	2	1	3	3	4	2	3	6	0	2	4	1	2	k__Bacteria; p__Firmicutes; c__Clostridia; o__Clostridiales; f__Family XI; g__Peptoniphilus; s__uncultured bacterium
OTU_891	2	0	1	0	1	0	1	0	9	0	0	0	0	k__Bacteria; p__Firmicutes; c__Clostridia; o__Clostridiales; f__Ruminococcaceae; g__Candidatus Soleaferrea; s__Bittarella massiliensis
OTU_1760	0	0	0	0	0	0	1	0	2	2	0	0	0	k__Bacteria; p__Bacteroidetes; c__Bacteroidia; o__Bacteroidales; f__Muribaculaceae
OTU_217	0	7	1	0	0	1	38	72	3	0	0	2	0	k__Bacteria; p__Actinobacteria; c__Coriobacteriia; o__Coriobacteriales; f__Eggerthellaceae
OTU_761	0	0	0	0	1	0	6	2	0	0	0	0	0	k__Bacteria; p__Actinobacteria; c__Coriobacteriia; o__Coriobacteriales; f__Eggerthellaceae; g__Parvibacter; s__uncultured bacterium
OTU_1207	28	70	41	3	12	10	1	0	4	0	13	1	0	k__Bacteria; p__Bacteroidetes; c__Bacteroidia; o__Bacteroidales; f__Muribaculaceae
OTU_406	2	0	0	0	0	0	26	20	2	2	0	2	0	k__Bacteria; p__Firmicutes; c__Bacilli; o__Lactobacillales; f__Streptococcaceae; g__Streptococcus
OTU_1286	0	0	0	1	0	4	5	0	0	2	6	0	1	k__Bacteria; p__Firmicutes; c__Bacilli; o__Lactobacillales; f__Streptococcaceae; g__Streptococcus; s__Streptococcus pneumoniae
OTU_2356	0	17	6	0	2	0	0	0	4	5	3	8	2	k__Bacteria; p__Bacteroidetes; c__Bacteroidia; o__Bacteroidales; f__Muribaculaceae; g__uncultured bacterium; s__uncultured bacterium
OTU_169	0	0	0	0	0	0	0	0	0	0	0	0	0	k__Bacteria; p__Firmicutes; c__Clostridia; o__Clostridiales; f__Lachnospiraceae; g__Tyzzerella 3; s__unidentified
OTU_2318	1	1	0	2	0	0	0	2	3	0	0	0	0	k__Bacteria; p__Actinobacteria; c__Coriobacteriia; o__Coriobacteriales; f__Eggerthellaceae; g__Enterorhabdus
OTU_447	1	2	0	0	0	0	0	0	0	0	0	0	0	k__Bacteria; p__Proteobacteria; c__Gammaproteobacteria; o__Pasteurellales; f__Pasteurellaceae; g__Haemophilus; s__uncultured bacterium
OTU_410	0	0	1	0	0	0	0	0	3	0	0	0	0	k__Bacteria; p__Bacteroidetes; c__Bacteroidia; o__Bacteroidales; f__Marinifilaceae; g__Butyricimonas
OTU_2472	0	0	4	0	5	0	0	0	3	0	6	1	0	k__Bacteria; p__Bacteroidetes; c__Bacteroidia; o__Bacteroidales; f__Muribaculaceae; g__uncultured bacterium; s__uncultured bacterium
OTU_1147	1	4	2	0	0	9	21	9	0	3	1	1	4	k__Bacteria; p__Firmicutes; c__Clostridia; o__Clostridiales; f__Lachnospiraceae; g__Blautia
OTU_933	0	5	1	0	0	1	1	0	0	0	0	0	0	k__Bacteria; p__Firmicutes; c__Clostridia; o__Clostridiales; f__Lachnospiraceae
OTU_896	0	3	0	0	0	15	1	0	0	0	0	0	0	k__Bacteria; p__Firmicutes; c__Clostridia; o__Clostridiales; f__Lachnospiraceae
OTU_1530	0	0	0	0	0	0	0	0	0	0	0	0	0	k__Bacteria; p__Bacteroidetes; c__Bacteroidia; o__Bacteroidales
OTU_160	503	1	153	0	31	9	0	0	376	0	6	5	0	k__Bacteria; p__Bacteroidetes; c__Bacteroidia; o__Bacteroidales; f__Muribaculaceae; g__uncultured bacterium; s__uncultured bacterium
OTU_1464	0	0	0	0	0	0	0	0	2	0	0	0	0	k__Bacteria
OTU_1706	0	19	1	0	0	0	0	0	0	0	2	2	1	k__Bacteria; p__Bacteroidetes; c__Bacteroidia; o__Bacteroidales; f__Muribaculaceae; g__uncultured bacterium; s__uncultured bacterium
OTU_138	13	5	2	0	0	1	81	49	4	1	0	0	0	k__Bacteria; p__Actinobacteria; c__Coriobacteriia; o__Coriobacteriales; f__Eggerthellaceae; g__Enterorhabdus; s__uncultured bacterium
OTU_1136	0	0	0	0	0	0	0	0	0	0	0	1	0	k__Bacteria; p__Firmicutes; c__Clostridia; o__Clostridiales; f__Ruminococcaceae; g__Ruminococcaceae UCG-009; s__uncultured bacterium
OTU_1181	0	20	0	1	1	3	0	0	0	1	0	0	4	k__Bacteria; p__Firmicutes; c__Clostridia; o__Clostridiales; f__Lachnospiraceae; g__GCA-900066575; s__uncultured bacterium
OTU_2156	49	0	18	1	8	19	0	3	5	2	0	0	0	k__Bacteria; p__Firmicutes; c__Clostridia; o__Clostridiales; f__Ruminococcaceae; g__Ruminococcaceae UCG-010; s__uncultured rumen bacterium
OTU_275	5	96	5	7	6	11	0	0	18	7	9	1	1	k__Bacteria; p__Firmicutes; c__Clostridia; o__Clostridiales; f__Lachnospiraceae
OTU_3000	0	0	0	0	0	0	0	0	0	0	0	0	0	k__Bacteria; p__Bacteroidetes; c__Bacteroidia; o__Chitinophagales; f__Chitinophagaceae; g__Flavisolibacter; s__uncultured bacterium
OTU_2884	0	3	0	3	1	8	0	0	0	1	3	1	2	k__Bacteria; p__Bacteroidetes; c__Bacteroidia; o__Bacteroidales; f__Muribaculaceae; g__uncultured bacterium; s__uncultured bacterium
OTU_2466	6	0	24	3	3	0	0	0	1	33	1	31	9	k__Bacteria; p__Bacteroidetes; c__Bacteroidia; o__Bacteroidales
OTU_264	3	79	1	1	1	10	0	0	13	1	0	0	1	k__Bacteria; p__Firmicutes; c__Clostridia; o__Clostridiales; f__Peptococcaceae; g__Peptococcus; s__uncultured bacterium
OTU_539	2	8	0	2	2	4	6	7	3	2	5	0	4	k__Bacteria; p__Firmicutes; c__Negativicutes; o__Selenomonadales; f__Veillonellaceae; g__Negativicoccus; s__Tissierellia bacterium S5-A11
OTU_182	15	0	7	3	17	0	0	1	304	0	30	2	0	k__Bacteria; p__Firmicutes; c__Clostridia; o__Clostridiales; f__Ruminococcaceae
OTU_1676	0	0	3	0	1	0	0	0	0	7	2	31	6	k__Bacteria; p__Bacteroidetes; c__Bacteroidia; o__Bacteroidales; f__Muribaculaceae; g__uncultured bacterium; s__uncultured bacterium
OTU_694	0	1	0	0	4	1	0	0	3	0	0	0	0	k__Bacteria; p__Firmicutes; c__Clostridia; o__Clostridiales; f__Ruminococcaceae; g__Ruminococcaceae UCG-010; s__uncultured bacterium
OTU_552	1	10	47	0	0	10	0	58	2	0	0	0	1	k__Bacteria; p__Firmicutes; c__Clostridia; o__Clostridiales; f__Ruminococcaceae; g__Ruminococcaceae UCG-014
OTU_686	0	35	0	4	2	4	20	0	1	6	0	0	0	k__Bacteria; p__Firmicutes; c__Clostridia; o__Clostridiales; f__Ruminococcaceae; g__Harryflintia; s__uncultured bacterium
OTU_236	4	0	0	166	16	10	23	13	6	1	10	1	0	k__Bacteria; p__Firmicutes; c__Clostridia; o__Clostridiales; f__Ruminococcaceae; g__Butyricicoccus; s__uncultured bacterium
OTU_841	0	0	0	0	0	0	12	3	0	0	0	0	0	k__Bacteria; p__Firmicutes; c__Clostridia; o__Clostridiales; f__Lachnospiraceae
OTU_955	0	0	0	0	0	0	0	0	0	0	0	0	0	k__Bacteria; p__Firmicutes; c__Bacilli; o__Lactobacillales; f__Lactobacillaceae; g__Lactobacillus
OTU_819	0	1	0	1	0	1	0	3	2	0	1	1	0	k__Bacteria; p__Firmicutes; c__Clostridia; o__Clostridiales; f__Family XI; g__Peptoniphilus
OTU_366	0	4	3	0	1	6	0	0	0	7	7	5	2	k__Bacteria; p__Firmicutes; c__Clostridia; o__Clostridiales; f__Ruminococcaceae
OTU_133	0	0	0	1	0	0	405	58	7	185	9	2	2	k__Bacteria; p__Proteobacteria; c__Deltaproteobacteria; o__Desulfovibrionales; f__Desulfovibrionaceae; g__uncultured; s__uncultured bacterium
OTU_1337	0	0	11	0	2	5	0	0	11	0	0	3	0	k__Bacteria; p__Firmicutes; c__Clostridia; o__Clostridiales; f__Clostridiales vadinBB60 group; g__uncultured bacterium; s__uncultured bacterium
OTU_1963	0	16	0	0	0	1	0	1	0	0	0	0	5	k__Bacteria; p__Firmicutes; c__Clostridia; o__Clostridiales; f__Lachnospiraceae
OTU_663	0	0	0	0	0	0	0	0	0	0	0	0	0	k__Bacteria; p__Firmicutes; c__Clostridia; o__Clostridiales; f__Lachnospiraceae
OTU_27	0	0	0	5	1	0	39	89	2	0	1	0	0	k__Bacteria; p__Proteobacteria; c__Alphaproteobacteria; o__Sphingomonadales; f__Sphingomonadaceae; g__Novosphingobium
OTU_2240	1	2	1	0	0	0	0	0	0	1	1	0	0	k__Bacteria
OTU_1617	0	0	0	0	0	0	0	0	0	0	0	0	0	k__Bacteria; p__Patescibacteria; c__Saccharimonadia; o__Saccharimonadales; f__Saccharimonadaceae; g__Candidatus Saccharimonas
OTU_2683	15	0	7	13	9	27	0	0	1	25	2	1	3	k__Bacteria; p__Bacteroidetes; c__Bacteroidia; o__Bacteroidales
OTU_2609	0	0	0	0	0	0	0	0	0	0	0	0	0	k__Bacteria; p__Bacteroidetes; c__Bacteroidia; o__Bacteroidales; f__Muribaculaceae; g__uncultured bacterium; s__uncultured bacterium
OTU_1529	0	0	0	2	0	0	0	0	0	2	1	2	9	k__Bacteria; p__Bacteroidetes; c__Bacteroidia; o__Bacteroidales
OTU_2009	0	4	0	6	0	2	2	0	0	5	0	0	1	k__Bacteria; p__Firmicutes; c__Clostridia; o__Clostridiales; f__Ruminococcaceae; g__Ruminiclostridium 5; s__uncultured bacterium
OTU_242	3	0	6	3	6	15	111	2	2	1	0	1	4	k__Bacteria; p__Proteobacteria; c__Gammaproteobacteria; o__Pseudomonadales; f__Pseudomonadaceae; g__Pseudomonas
OTU_1763	0	0	0	0	0	0	0	0	0	0	0	0	0	k__Bacteria; p__Firmicutes; c__Bacilli; o__Lactobacillales; f__Lactobacillaceae; g__Lactobacillus
OTU_2873	0	0	0	0	0	0	0	0	0	0	0	0	0	k__Bacteria; p__Bacteroidetes; c__Bacteroidia; o__Bacteroidales; f__Muribaculaceae; g__uncultured bacterium; s__uncultured bacterium
OTU_2525	0	0	0	0	0	0	7	5	0	0	0	0	0	k__Bacteria; p__Firmicutes; c__Bacilli; o__Lactobacillales; f__Streptococcaceae; g__Streptococcus; s__Streptococcus gallolyticus subsp. macedonicus
OTU_1828	0	0	0	0	0	0	0	0	0	0	0	0	0	k__Bacteria; p__Bacteroidetes; c__Bacteroidia; o__Bacteroidales; f__Muribaculaceae
OTU_2736	2	0	0	0	1	1	0	0	0	2	0	0	0	k__Bacteria; p__Bacteroidetes; c__Bacteroidia; o__Bacteroidales; f__Muribaculaceae; g__uncultured bacterium; s__uncultured bacterium
OTU_245	0	63	0	1	2	29	24	0	2	5	0	0	1	k__Bacteria; p__Firmicutes; c__Clostridia; o__Clostridiales; f__Ruminococcaceae; g__Ruminococcaceae UCG-009
OTU_1125	0	0	0	0	0	6	2	21	0	3	0	1	1	k__Bacteria; p__Firmicutes; c__Clostridia; o__Clostridiales; f__Lachnospiraceae; g__uncultured; s__uncultured bacterium
OTU_1779	0	11	2	16	0	13	0	0	0	0	0	0	1	k__Bacteria; p__Firmicutes; c__Clostridia; o__Clostridiales; f__Ruminococcaceae; g__Ruminiclostridium 9; s__uncultured bacterium
OTU_2784	0	0	0	0	0	0	0	0	0	0	0	0	0	k__Bacteria; p__Bacteroidetes; c__Bacteroidia; o__Bacteroidales; f__Muribaculaceae; g__uncultured bacterium; s__uncultured bacterium
OTU_2169	0	0	2	0	1	0	0	0	0	0	0	0	0	k__Bacteria
OTU_1049	0	2	0	2	2	6	3	8	2	8	3	2	5	k__Bacteria; p__Bacteroidetes; c__Bacteroidia; o__Bacteroidales; f__Prevotellaceae; g__Prevotella
OTU_2896	0	0	0	6	0	2	2	0	0	0	0	0	0	k__Bacteria; p__Firmicutes; c__Clostridia; o__Clostridiales; f__Lachnospiraceae
OTU_119	0	1	0	0	0	0	16	8	1	0	0	0	0	k__Bacteria; p__Proteobacteria; c__Alphaproteobacteria; o__Caulobacterales; f__Caulobacteraceae; g__Caulobacter; s__uncultured bacterium
OTU_1366	0	0	2	0	1	0	0	0	1	5	0	6	1	k__Bacteria; p__Bacteroidetes; c__Bacteroidia; o__Bacteroidales; f__Bacteroidaceae; g__Bacteroides; s__human gut metagenome
OTU_1635	0	0	0	0	0	0	0	0	0	0	0	0	0	k__Bacteria; p__Firmicutes; c__Erysipelotrichia; o__Erysipelotrichales; f__Erysipelotrichaceae; g__Faecalibaculum; s__Faecalibaculum rodentium
OTU_1712	0	32	1	2	0	12	0	0	0	1	0	0	0	k__Bacteria; p__Firmicutes; c__Clostridia; o__Clostridiales; f__Ruminococcaceae
OTU_227	1	0	0	0	0	0	17	0	1	0	0	88	0	k__Bacteria; p__Bacteroidetes; c__Bacteroidia; o__Bacteroidales; f__Rikenellaceae; g__Alistipes
OTU_1161	0	28	39	0	0	40	0	0	0	39	0	0	0	k__Bacteria; p__Firmicutes; c__Clostridia; o__Clostridiales; f__Clostridiales vadinBB60 group; g__uncultured bacterium; s__uncultured bacterium
OTU_724	0	0	0	0	2	0	0	0	0	0	0	0	0	k__Bacteria; p__Actinobacteria; c__Coriobacteriia; o__Coriobacteriales; f__Eggerthellaceae; g__Enterorhabdus; s__uncultured bacterium
OTU_57	4	0	8	35	3	0	798	19	2	1	12	13	0	k__Bacteria; p__Bacteroidetes; c__Bacteroidia; o__Bacteroidales; f__Tannerellaceae; g__Parabacteroides
OTU_1584	0	0	0	1	0	2	1	0	0	0	0	0	0	k__Bacteria; p__Firmicutes; c__Clostridia; o__Clostridiales; f__Lachnospiraceae
OTU_972	0	0	0	3	1	0	1	2	0	0	2	2	0	k__Bacteria; p__Proteobacteria; c__Gammaproteobacteria; o__Pseudomonadales; f__Moraxellaceae; g__Enhydrobacter; s__uncultured bacterium
OTU_2551	0	37	0	0	0	16	2	0	0	0	0	0	1	k__Bacteria; p__Firmicutes; c__Clostridia; o__Clostridiales; f__Ruminococcaceae; g__Intestinimonas; s__uncultured bacterium
OTU_244	0	3	0	0	0	1	36	2	2	0	1	0	0	k__Bacteria; p__Firmicutes; c__Clostridia; o__Clostridiales; f__Ruminococcaceae
OTU_341	0	1	19	0	2	9	0	3	0	2	9	8	0	k__Bacteria; p__Firmicutes; c__Clostridia; o__Clostridiales; f__Lachnospiraceae; g__A2; s__uncultured bacterium
OTU_254	3	1	0	5	0	1	3	0	4	1	2	0	2	k__Bacteria; p__Firmicutes; c__Clostridia; o__Clostridiales; f__Lachnospiraceae; g__Blautia; s__uncultured organism
OTU_322	1	11	2	1	1	10	0	16	0	0	1	0	0	k__Bacteria; p__Firmicutes; c__Clostridia; o__Clostridiales; f__Lachnospiraceae; g__A2; s__uncultured bacterium
OTU_569	0	26	6	25	7	4	0	1	29	15	0	7	0	k__Bacteria; p__Firmicutes; c__Clostridia; o__Clostridiales; f__Clostridiales vadinBB60 group; g__uncultured bacterium; s__uncultured bacterium
OTU_734	0	21	22	0	0	0	0	1	0	0	0	0	0	k__Bacteria; p__Firmicutes; c__Clostridia; o__Clostridiales; f__Ruminococcaceae; g__Ruminococcaceae UCG-014
OTU_255	0	0	1	1	0	1	0	1	2	0	1	0	0	k__Bacteria; p__Actinobacteria; c__Coriobacteriia; o__Coriobacteriales; f__Coriobacteriaceae; g__Collinsella; s__uncultured bacterium
OTU_1883	0	0	0	0	0	0	0	0	0	0	0	0	0	k__Bacteria; p__Bacteroidetes; c__Bacteroidia; o__Bacteroidales; f__Muribaculaceae
OTU_1858	0	0	0	0	0	0	0	0	0	0	0	0	0	k__Bacteria; p__Bacteroidetes; c__Bacteroidia; o__Bacteroidales; f__Muribaculaceae
OTU_155	2	16	4	11	10	3	110	187	3	2	27	2	0	k__Bacteria; p__Actinobacteria; c__Coriobacteriia; o__Coriobacteriales; f__Eggerthellaceae; g__Enterorhabdus; s__uncultured bacterium
OTU_407	0	59	1	0	0	10	0	0	1	1	0	1	1	k__Bacteria; p__Firmicutes; c__Clostridia; o__Clostridiales; f__Ruminococcaceae; g__Ruminiclostridium
OTU_2372	0	0	0	0	0	0	0	0	0	0	0	0	0	k__Bacteria; p__Firmicutes; c__Clostridia; o__Clostridiales; f__Lachnospiraceae
OTU_310	2	27	1	0	1	1	0	5	6	0	0	1	0	k__Bacteria; p__Firmicutes; c__Clostridia; o__Clostridiales; f__Lachnospiraceae; g__GCA-900066575; s__uncultured bacterium
OTU_650	1	5	0	2	5	3	0	0	0	3	5	5	5	k__Bacteria; p__Actinobacteria; c__Actinobacteria; o__Actinomycetales; f__Actinomycetaceae; g__Mobiluncus; s__Mobiluncus curtisii subsp. curtisii ATCC 35241
OTU_1593	0	0	0	0	0	0	0	0	0	0	0	0	0	k__Bacteria; p__Firmicutes; c__Clostridia; o__Clostridiales
OTU_1462	0	0	0	0	0	0	0	0	0	0	0	0	0	k__Bacteria; p__Firmicutes; c__Bacilli; o__Bacillales; f__Bacillaceae; g__Anoxybacillus; s__uncultured bacterium
OTU_2350	0	0	4	8	0	4	0	0	0	8	1	4	3	k__Bacteria; p__Bacteroidetes; c__Bacteroidia; o__Bacteroidales
OTU_1629	0	5	3	5	2	14	0	0	0	0	0	3	0	k__Bacteria; p__Firmicutes; c__Clostridia; o__Clostridiales; f__Clostridiales vadinBB60 group; g__uncultured bacterium; s__uncultured bacterium
OTU_293	0	17	2	0	5	29	20	12	5	8	0	1	2	k__Bacteria; p__Firmicutes; c__Clostridia; o__Clostridiales; f__Lachnospiraceae; g__uncultured; s__uncultured bacterium
OTU_1176	0	0	7	1	37	0	0	0	0	0	10	1	1	k__Bacteria; p__Bacteroidetes; c__Bacteroidia; o__Bacteroidales; f__Muribaculaceae; g__uncultured bacterium; s__uncultured bacterium
OTU_1628	0	0	0	0	0	0	0	0	0	0	0	0	0	k__Bacteria; p__Bacteroidetes; c__Bacteroidia; o__Bacteroidales; f__Muribaculaceae; g__uncultured bacterium; s__uncultured bacterium
OTU_294	0	0	0	0	0	0	0	0	0	36	0	0	0	k__Bacteria; p__Firmicutes; c__Clostridia; o__Clostridiales; f__Lachnospiraceae
OTU_2937	0	0	1	0	0	0	0	0	0	0	2	0	0	k__Bacteria; p__Bacteroidetes; c__Bacteroidia; o__Bacteroidales; f__Muribaculaceae
OTU_962	0	0	0	0	0	0	0	0	2	0	0	0	1	k__Bacteria; p__Tenericutes; c__Mollicutes; o__Mollicutes RF39; f__uncultured bacterium; g__uncultured bacterium; s__uncultured bacterium
OTU_501	0	0	0	8	2	4	0	0	14	3	5	2	0	k__Bacteria; p__Firmicutes; c__Clostridia; o__Clostridiales; f__Ruminococcaceae
OTU_630	0	0	1	23	0	5	0	0	2	0	0	2	0	k__Bacteria; p__Firmicutes; c__Clostridia; o__Clostridiales; f__Clostridiales vadinBB60 group; g__uncultured bacterium; s__uncultured bacterium
OTU_66	0	0	12	358	25	103	56	0	7	26	5	14	16	k__Bacteria; p__Deferribacteres; c__Deferribacteres; o__Deferribacterales; f__Deferribacteraceae; g__Mucispirillum; s__Mucispirillum schaedleri ASF457
OTU_1316	0	0	3	0	0	0	0	0	0	1	1	0	2	k__Bacteria; p__Bacteroidetes; c__Bacteroidia; o__Bacteroidales; f__Muribaculaceae; g__uncultured bacterium; s__uncultured bacterium
OTU_570	0	0	0	0	1	13	0	0	0	0	0	0	0	k__Bacteria; p__Firmicutes; c__Clostridia; o__Clostridiales; f__Lachnospiraceae
OTU_904	1	2	0	1	1	2	186	11	3	2	5	5	1	k__Bacteria; p__Bacteroidetes; c__Bacteroidia; o__Bacteroidales; f__Bacteroidaceae; g__Bacteroides
OTU_1174	7	8	6	0	6	1	4	0	1	12	3	10	1	k__Bacteria; p__Bacteroidetes; c__Bacteroidia; o__Bacteroidales
OTU_1301	0	3	2	0	0	1	2	4	0	1	1	1	3	k__Bacteria; p__Firmicutes; c__Clostridia; o__Clostridiales; f__Lachnospiraceae; g__Roseburia
OTU_530	0	0	0	0	0	0	0	0	0	0	0	2	3	k__Bacteria; p__Firmicutes; c__Clostridia; o__Clostridiales; f__Ruminococcaceae; g__Butyricicoccus; s__uncultured bacterium
OTU_2878	0	0	0	0	0	0	0	0	0	0	0	0	0	k__Bacteria
OTU_1025	0	0	0	0	0	0	3	0	0	0	0	0	0	k__Bacteria; p__Firmicutes; c__Clostridia; o__Clostridiales; f__Ruminococcaceae
OTU_93	0	0	0	1	1	3	18	20	0	0	1	0	0	k__Bacteria; p__Proteobacteria; c__Alphaproteobacteria; o__Caulobacterales; f__Caulobacteraceae; g__Brevundimonas; s__uncultured bacterium
OTU_493	83	0	3	0	0	5	0	0	0	0	0	0	0	k__Bacteria; p__Firmicutes; c__Erysipelotrichia; o__Erysipelotrichales; f__Erysipelotrichaceae; g__Dubosiella; s__uncultured bacterium
OTU_296	0	41	4	0	0	6	0	8	0	5	0	0	0	k__Bacteria; p__Firmicutes; c__Clostridia; o__Clostridiales; f__Lachnospiraceae
OTU_128	0	597	10	0	0	0	0	261	1	0	0	0	0	k__Bacteria; p__Firmicutes; c__Clostridia; o__Clostridiales; f__Ruminococcaceae; g__Ruminococcaceae UCG-014; s__uncultured rumen bacterium
OTU_301	0	0	1	0	0	0	21	0	0	0	0	0	0	k__Bacteria; p__Firmicutes; c__Clostridia; o__Clostridiales; f__Lachnospiraceae
OTU_1422	0	0	0	0	0	0	0	0	0	0	0	0	0	k__Bacteria; p__Bacteroidetes; c__Bacteroidia; o__Bacteroidales
OTU_2888	0	0	0	0	0	0	0	0	4	0	0	0	0	k__Bacteria; p__Bacteroidetes; c__Bacteroidia; o__Bacteroidales; f__Muribaculaceae; g__uncultured bacterium; s__uncultured bacterium
OTU_2552	0	0	0	0	0	0	0	0	0	0	0	0	0	k__Bacteria; p__Bacteroidetes; c__Bacteroidia; o__Bacteroidales; f__Muribaculaceae; g__uncultured bacterium; s__uncultured bacterium
OTU_434	1	0	0	0	1	0	0	0	0	0	0	0	0	k__Bacteria; p__Bacteroidetes; c__Bacteroidia; o__Bacteroidales; f__Bacteroidaceae; g__Bacteroides
OTU_2017	1	0	3	1	1	0	0	0	0	1	2	0	4	k__Bacteria; p__Bacteroidetes; c__Bacteroidia; o__Bacteroidales; f__Muribaculaceae; g__uncultured bacterium; s__uncultured bacterium
OTU_1237	0	2	0	0	0	26	8	0	0	2	0	0	0	k__Bacteria; p__Firmicutes; c__Clostridia; o__Clostridiales; f__Lachnospiraceae
OTU_1421	0	0	0	0	0	0	0	0	0	0	0	0	0	k__Bacteria; p__Firmicutes; c__Clostridia; o__Clostridiales; f__Lachnospiraceae; g__Lachnospiraceae NK4A136 group
OTU_321	0	3	0	0	1	1	29	14	4	0	1	1	0	k__Bacteria; p__Bacteroidetes; c__Bacteroidia; o__Bacteroidales; f__Bacteroidaceae; g__Bacteroides
OTU_340	0	0	0	0	0	1	0	0	0	0	0	0	2	k__Bacteria; p__Firmicutes; c__Negativicutes; o__Selenomonadales; f__Veillonellaceae; g__Dialister; s__uncultured bacterium
OTU_1630	0	0	0	0	0	0	0	0	0	0	0	0	0	k__Bacteria
OTU_1015	0	0	0	9	0	6	0	1	0	2	9	1	1	k__Bacteria; p__Firmicutes; c__Clostridia; o__Clostridiales; f__Ruminococcaceae; g__GCA-900066225; s__uncultured bacterium
OTU_2984	0	0	0	0	0	0	0	0	0	0	0	0	0	k__Bacteria
OTU_478	0	1	1	0	0	0	0	1	0	0	0	1	0	k__Bacteria; p__Firmicutes; c__Clostridia; o__Clostridiales; f__Christensenellaceae; g__Christensenellaceae R-7 group; s__uncultured bacterium
OTU_345	0	76	0	0	0	0	5	0	0	0	1	0	0	k__Bacteria; p__Firmicutes; c__Clostridia; o__Clostridiales; f__Lachnospiraceae; g__Roseburia; s__uncultured bacterium
OTU_2881	6	0	6	1	4	0	0	0	0	2	2	3	0	k__Bacteria; p__Bacteroidetes; c__Bacteroidia; o__Bacteroidales; f__Muribaculaceae; g__uncultured bacterium; s__uncultured bacterium
OTU_2363	0	0	0	0	0	0	0	0	4	1	14	0	2	k__Bacteria; p__Bacteroidetes; c__Bacteroidia; o__Bacteroidales; f__Muribaculaceae; g__uncultured bacterium; s__uncultured bacterium
OTU_2305	0	0	0	0	0	0	0	0	2	0	0	0	0	k__Bacteria; p__Bacteroidetes; c__Bacteroidia; o__Bacteroidales; f__Muribaculaceae; g__uncultured bacterium; s__uncultured bacterium
OTU_676	5	0	1	0	0	0	1	0	1	0	0	0	1	k__Bacteria; p__Proteobacteria; c__Gammaproteobacteria; o__Betaproteobacteriales; f__Burkholderiaceae; g__Cupriavidus
OTU_507	0	0	0	3	0	0	106	9	1	0	1	1	0	k__Bacteria; p__Firmicutes; c__Clostridia; o__Clostridiales; f__Ruminococcaceae; g__Ruminococcus 2; s__uncultured bacterium
OTU_2877	0	0	0	0	0	0	0	0	0	0	0	0	0	k__Bacteria; p__Tenericutes; c__Mollicutes; o__Mollicutes RF39
OTU_2710	0	0	1	0	0	0	0	0	0	0	0	0	0	k__Bacteria; p__Bacteroidetes; c__Bacteroidia; o__Bacteroidales; f__Muribaculaceae
OTU_399	1	2	0	9	5	20	0	0	9	21	0	0	0	k__Bacteria; p__Firmicutes; c__Clostridia; o__Clostridiales; f__Ruminococcaceae
OTU_402	5	1	0	5	3	9	2	4	5	7	0	6	5	k__Bacteria; p__Actinobacteria; c__Actinobacteria; o__Actinomycetales; f__Actinomycetaceae; g__Actinomyces; s__Actinomyces neuii BVS029A5
OTU_2833	0	0	0	0	0	0	0	0	1	0	0	0	0	k__Bacteria; p__Bacteroidetes; c__Bacteroidia; o__Bacteroidales; f__Muribaculaceae; g__uncultured bacterium; s__uncultured bacterium
OTU_1403	2	15	50	1	69	0	0	0	0	0	0	0	0	k__Bacteria; p__Bacteroidetes; c__Bacteroidia; o__Bacteroidales; f__Muribaculaceae; g__uncultured bacterium; s__uncultured bacterium
OTU_312	4	3	1	4	0	0	13	0	2	4	0	3	0	k__Bacteria; p__Bacteroidetes; c__Bacteroidia; o__Bacteroidales; f__Bacteroidaceae; g__Bacteroides; s__unidentified
OTU_1818	0	0	3	0	0	0	0	0	3	0	0	0	0	k__Bacteria; p__Bacteroidetes; c__Bacteroidia; o__Bacteroidales; f__Muribaculaceae; g__uncultured bacterium; s__uncultured bacterium
OTU_1259	1	0	8	7	3	3	0	0	8	33	15	7	30	k__Bacteria; p__Bacteroidetes; c__Bacteroidia; o__Bacteroidales; f__Muribaculaceae
OTU_418	1	1	1	8	0	0	62	44	5	0	6	11	1	k__Bacteria; p__Firmicutes; c__Clostridia; o__Clostridiales; f__Lachnospiraceae; g__Agathobacter
OTU_129	12	31	27	4	22	1	14	46	17	54	1	17	0	k__Bacteria; p__Bacteroidetes; c__Bacteroidia; o__Bacteroidales; f__Muribaculaceae; g__uncultured bacterium; s__uncultured bacterium
OTU_2062	0	0	1	0	0	7	0	0	0	0	0	0	0	k__Bacteria; p__Firmicutes; c__Clostridia; o__Clostridiales
OTU_401	0	0	2	55	5	2	0	0	9	1	0	0	0	k__Bacteria; p__Firmicutes; c__Clostridia; o__Clostridiales; f__Clostridiales vadinBB60 group; g__uncultured bacterium; s__uncultured bacterium
OTU_1516	0	17	1	5	0	5	0	0	0	0	0	0	2	k__Bacteria; p__Firmicutes; c__Clostridia; o__Clostridiales; f__Lachnospiraceae
OTU_1253	0	0	0	0	0	2	0	1	1	0	0	0	0	k__Bacteria; p__Tenericutes; c__Mollicutes; o__Mollicutes RF39; f__uncultured bacterium; g__uncultured bacterium; s__uncultured bacterium
OTU_202	0	0	0	0	0	0	0	0	0	0	1	0	0	k__Bacteria; p__Firmicutes; c__Negativicutes; o__Selenomonadales; f__Veillonellaceae; g__Megasphaera; s__uncultured bacterium
OTU_273	3	90	13	31	8	21	0	0	21	1	7	1	0	k__Bacteria; p__Firmicutes; c__Clostridia; o__Clostridiales; f__Clostridiales vadinBB60 group; g__uncultured bacterium; s__uncultured bacterium
OTU_1248	0	0	0	0	0	0	0	0	0	0	0	0	0	k__Bacteria; p__Firmicutes; c__Clostridia; o__Clostridiales; f__Ruminococcaceae
OTU_2556	0	3	0	0	0	0	0	0	0	0	0	0	0	k__Bacteria; p__Firmicutes; c__Clostridia; o__Clostridiales; f__Clostridiales vadinBB60 group
OTU_1964	0	0	3	1	0	4	0	0	0	0	0	1	1	k__Bacteria; p__Bacteroidetes; c__Bacteroidia; o__Bacteroidales
OTU_1189	1	0	0	0	0	0	0	2	0	0	0	0	0	k__Bacteria; p__Tenericutes; c__Mollicutes; o__Mollicutes RF39
OTU_2764	0	0	0	0	0	0	0	0	0	0	0	0	0	k__Bacteria; p__Bacteroidetes; c__Bacteroidia; o__Bacteroidales
OTU_1103	4	1	1	0	1	0	0	0	4	0	0	8	0	k__Bacteria; p__Bacteroidetes; c__Bacteroidia; o__Bacteroidales; f__Muribaculaceae; g__uncultured bacterium; s__uncultured bacterium
OTU_1594	0	0	0	0	0	0	0	0	0	0	0	0	0	k__Bacteria
OTU_352	0	0	0	0	0	0	0	0	0	0	0	0	0	k__Bacteria; p__Proteobacteria; c__Gammaproteobacteria; o__Enterobacteriales; f__Enterobacteriaceae; g__Proteus; s__Proteus mirabilis
OTU_270	0	1	0	1	0	6	22	19	0	1	2	0	3	k__Bacteria; p__Firmicutes; c__Clostridia; o__Clostridiales; f__Lachnospiraceae; g__[Eubacterium] eligens group; s__uncultured bacterium
OTU_1461	0	0	0	0	0	0	0	0	0	0	0	0	0	k__Bacteria
OTU_1102	0	0	0	0	0	0	0	0	0	0	0	0	0	k__Bacteria; p__Firmicutes; c__Clostridia; o__Clostridiales; f__Christensenellaceae; g__Christensenellaceae R-7 group; s__uncultured organism
OTU_25	4	3	173	221	139	0	1792	606	1212	50	688	1	0	k__Bacteria; p__Bacteroidetes; c__Bacteroidia; o__Bacteroidales; f__Muribaculaceae; g__uncultured organism; s__uncultured organism
OTU_1413	0	1	0	0	0	1	0	0	0	0	0	0	0	k__Bacteria; p__Tenericutes; c__Mollicutes; o__Mollicutes RF39
OTU_2202	0	0	0	0	0	0	0	0	2	0	0	0	0	k__Bacteria; p__Bacteroidetes; c__Bacteroidia; o__Bacteroidales; f__Muribaculaceae; g__uncultured bacterium; s__uncultured bacterium
OTU_1792	0	0	0	0	0	0	0	0	0	0	0	0	0	k__Bacteria
OTU_91	0	0	0	0	0	0	1	0	0	0	0	0	0	k__Bacteria; p__Proteobacteria; c__Gammaproteobacteria; o__Betaproteobacteriales; f__Burkholderiaceae; g__Ralstonia; s__uncultured Ralstonia sp.
OTU_354	1	0	0	0	0	0	47	11	1	0	0	0	0	k__Bacteria; p__Deinococcus-Thermus; c__Deinococci; o__Thermales; f__Thermaceae; g__Thermus; s__uncultured Thermus sp.
OTU_314	0	3	1	1	0	0	1	0	2	1	0	0	2	k__Bacteria; p__Firmicutes; c__Clostridia; o__Clostridiales; f__Lachnospiraceae; g__[Ruminococcus] torques group; s__uncultured organism
OTU_97	0	145	31	0	2	66	0	0	0	0	6	0	0	k__Bacteria; p__Firmicutes; c__Clostridia; o__Clostridiales; f__Ruminococcaceae; g__Anaerotruncus; s__uncultured bacterium
OTU_2774	0	0	0	0	0	0	0	1	0	0	0	0	0	k__Bacteria; p__Firmicutes; c__Clostridia; o__Clostridiales; f__Lachnospiraceae; g__Dorea; s__Dorea formicigenerans ATCC 27755
OTU_171	0	18	0	1	0	4	3	28	3	1	0	1	0	k__Bacteria; p__Firmicutes; c__Clostridia; o__Clostridiales; f__Lachnospiraceae; g__[Eubacterium] ventriosum group; s__uncultured bacterium
OTU_125	57	515	13	6	12	17	14	1	2	1	0	0	0	k__Bacteria; p__Firmicutes; c__Clostridia; o__Clostridiales; f__Lachnospiraceae
OTU_229	0	23	1	0	5	25	0	13	0	2	6	2	0	k__Bacteria; p__Firmicutes; c__Clostridia; o__Clostridiales; f__Ruminococcaceae; g__Anaerotruncus; s__uncultured bacterium
OTU_2346	0	10	0	0	0	2	5	0	0	6	0	3	3	k__Bacteria; p__Firmicutes; c__Clostridia; o__Clostridiales; f__Ruminococcaceae; g__Ruminiclostridium 5; s__uncultured bacterium
OTU_1504	4	1	17	7	42	4	0	0	7	18	7	27	6	k__Bacteria; p__Bacteroidetes; c__Bacteroidia; o__Bacteroidales
OTU_2043	0	0	0	0	0	0	0	0	0	0	0	0	0	k__Bacteria; p__Bacteroidetes; c__Bacteroidia; o__Bacteroidales; f__Muribaculaceae; g__uncultured bacterium; s__uncultured bacterium
OTU_1279	0	0	0	0	0	0	0	0	0	0	0	0	0	k__Bacteria; p__Firmicutes; c__Clostridia; o__Clostridiales; f__Lachnospiraceae
OTU_831	0	0	0	0	0	0	0	0	0	0	0	0	0	k__Bacteria; p__Tenericutes; c__Mollicutes; o__Mollicutes RF39
OTU_2753	0	0	0	0	0	0	0	0	0	0	0	0	0	k__Bacteria; p__Firmicutes; c__Clostridia; o__Clostridiales
OTU_2480	0	2	1	0	0	1	0	0	0	6	1	2	0	k__Bacteria; p__Bacteroidetes; c__Bacteroidia; o__Bacteroidales
OTU_1010	0	4	0	6	0	2	0	1	0	0	0	0	0	k__Bacteria; p__Firmicutes; c__Clostridia; o__Clostridiales; f__Lachnospiraceae
OTU_1469	0	0	0	0	0	0	0	0	0	0	0	0	0	k__Bacteria; p__Firmicutes; c__Clostridia; o__Clostridiales; f__Clostridiales vadinBB60 group; g__uncultured bacterium; s__uncultured bacterium
OTU_211	0	177	0	0	0	0	0	42	1	0	0	0	6	k__Bacteria; p__Firmicutes; c__Clostridia; o__Clostridiales; f__Ruminococcaceae; g__Ruminococcaceae UCG-014; s__uncultured bacterium
OTU_749	0	0	0	0	0	0	0	1	0	0	0	0	0	k__Bacteria
OTU_1266	0	1	0	0	0	0	0	0	1	0	0	0	0	k__Bacteria; p__Bacteroidetes; c__Bacteroidia; o__Bacteroidales; f__Muribaculaceae
OTU_241	0	22	0	0	0	7	104	8	0	4	0	0	2	k__Bacteria; p__Firmicutes; c__Clostridia; o__Clostridiales; f__Ruminococcaceae; g__Ruminiclostridium; s__uncultured bacterium
OTU_1598	0	0	0	0	0	0	0	0	2	1	0	2	3	k__Bacteria; p__Bacteroidetes; c__Bacteroidia; o__Bacteroidales
OTU_952	0	0	7	0	0	0	0	0	0	2	2	0	0	k__Bacteria; p__Bacteroidetes; c__Bacteroidia; o__Bacteroidales; f__Muribaculaceae
OTU_2088	0	0	0	0	0	2	0	0	0	0	0	0	0	k__Bacteria; p__Firmicutes; c__Clostridia; o__Clostridiales; f__Ruminococcaceae
OTU_1570	0	2	11	0	0	14	0	0	0	1	0	0	0	k__Bacteria; p__Firmicutes; c__Clostridia; o__Clostridiales; f__Lachnospiraceae; g__Lachnospiraceae NK4A136 group; s__Lachnospiraceae bacterium COE1
OTU_356	0	9	0	40	0	2	0	0	7	9	0	5	2	k__Bacteria; p__Firmicutes; c__Clostridia; o__Clostridiales; f__Family XIII; g__[Eubacterium] brachy group; s__uncultured bacterium
OTU_2197	0	3	0	0	0	0	0	0	0	0	0	0	0	k__Bacteria; p__Bacteroidetes; c__Bacteroidia; o__Bacteroidales; f__Muribaculaceae
OTU_1709	0	0	0	0	0	0	0	0	0	1	0	0	0	k__Bacteria; p__Bacteroidetes; c__Bacteroidia; o__Bacteroidales; f__Muribaculaceae; g__uncultured bacterium; s__uncultured bacterium
OTU_1014	0	0	0	0	0	0	0	0	0	0	0	0	0	k__Bacteria; p__Firmicutes; c__Erysipelotrichia; o__Erysipelotrichales; f__Erysipelotrichaceae; g__Turicibacter; s__uncultured bacterium
OTU_2329	0	0	0	0	0	0	0	0	0	1	0	0	0	k__Bacteria
OTU_2413	14	1	1	0	5	2	0	0	0	3	0	1	7	k__Bacteria; p__Bacteroidetes; c__Bacteroidia; o__Bacteroidales; f__Muribaculaceae; g__uncultured bacterium; s__uncultured bacterium
OTU_2570	87	0	159	0	291	0	0	0	27	46	199	126	11	k__Bacteria; p__Bacteroidetes; c__Bacteroidia; o__Bacteroidales; f__Muribaculaceae; g__uncultured bacterium; s__uncultured bacterium
OTU_1903	45	0	8	102	13	238	0	0	0	60	16	8	2	k__Bacteria; p__Bacteroidetes; c__Bacteroidia; o__Bacteroidales; f__Bacteroidaceae; g__Bacteroides; s__Bacteroides acidifaciens
OTU_1419	0	0	7	0	1	0	0	0	2	1	21	12	4	k__Bacteria; p__Bacteroidetes; c__Bacteroidia; o__Bacteroidales; f__Muribaculaceae; g__uncultured bacterium; s__uncultured bacterium
OTU_1002	2	0	0	0	0	0	0	1	0	0	0	1	0	k__Bacteria; p__Firmicutes; c__Clostridia; o__Clostridiales; f__Family XI; g__Peptoniphilus
OTU_1604	0	0	0	0	0	2	0	37	7	0	0	0	0	k__Bacteria; p__Actinobacteria; c__Coriobacteriia; o__Coriobacteriales; f__Eggerthellaceae; g__Enterorhabdus; s__uncultured bacterium
OTU_111	1	2	3	0	4	2	0	28	0	0	2	0	0	k__Bacteria; p__Firmicutes; c__Clostridia; o__Clostridiales; f__Ruminococcaceae; g__Ruminococcaceae UCG-014
OTU_1483	0	0	0	0	0	0	0	0	0	0	0	0	0	k__Bacteria; p__Bacteroidetes; c__Bacteroidia; o__Bacteroidales; f__Muribaculaceae; g__uncultured bacterium; s__uncultured bacterium
OTU_1036	0	0	0	0	0	0	0	7	0	0	0	0	0	k__Bacteria; p__Firmicutes; c__Clostridia; o__Clostridiales; f__Ruminococcaceae; g__Ruminococcaceae UCG-014; s__uncultured rumen bacterium
OTU_1583	0	0	0	0	2	0	0	0	0	0	0	0	0	k__Bacteria; p__Bacteroidetes; c__Bacteroidia; o__Bacteroidales; f__Muribaculaceae; g__uncultured bacterium; s__uncultured bacterium
OTU_2590	1	3	1	0	0	3	0	0	0	0	0	3	2	k__Bacteria; p__Bacteroidetes; c__Bacteroidia; o__Bacteroidales
OTU_261	0	8	20	1	0	185	0	65	1	0	0	0	2	k__Bacteria; p__Firmicutes; c__Clostridia; o__Clostridiales; f__Ruminococcaceae; g__Ruminococcaceae UCG-014; s__uncultured bacterium
OTU_1409	4	0	11	0	5	0	0	0	6	16	2	10	6	k__Bacteria; p__Bacteroidetes; c__Bacteroidia; o__Bacteroidales; f__Muribaculaceae; g__uncultured bacterium; s__uncultured bacterium
OTU_1254	20	0	15	0	4	0	0	0	1	0	16	15	1	k__Bacteria; p__Bacteroidetes; c__Bacteroidia; o__Bacteroidales; f__Muribaculaceae; g__uncultured bacterium; s__uncultured bacterium
OTU_2512	0	1	0	0	0	2	3	0	0	0	0	0	0	k__Bacteria; p__Bacteroidetes; c__Bacteroidia; o__Bacteroidales; f__Muribaculaceae
OTU_1605	4	0	3	0	0	3	0	0	0	2	0	0	1	k__Bacteria; p__Bacteroidetes; c__Bacteroidia; o__Bacteroidales; f__Muribaculaceae; g__uncultured bacterium; s__uncultured bacterium
OTU_187	0	5	0	0	0	3	52	1	0	0	0	0	0	k__Bacteria; p__Bacteroidetes; c__Bacteroidia; o__Bacteroidales; f__Prevotellaceae; g__Prevotellaceae UCG-001; s__uncultured bacterium
OTU_77	16	15	2	22	0	1	111	14	2114	1	0	114	2	k__Bacteria; p__Firmicutes; c__Clostridia; o__Clostridiales; f__Ruminococcaceae; g__Ruminiclostridium 5; s__uncultured bacterium
OTU_2496	5	0	7	0	3	0	0	0	1	4	2	18	5	k__Bacteria; p__Bacteroidetes; c__Bacteroidia; o__Bacteroidales
OTU_2151	0	0	1	0	0	0	0	0	1	1	0	0	0	k__Bacteria; p__Bacteroidetes; c__Bacteroidia; o__Bacteroidales; f__Muribaculaceae; g__uncultured bacterium; s__uncultured bacterium
OTU_196	0	143	1	0	2	1	2	0	0	4	2	0	13	k__Bacteria; p__Firmicutes; c__Clostridia; o__Clostridiales; f__Ruminococcaceae; g__GCA-900066225
OTU_2246	0	0	0	0	0	0	0	0	0	0	0	0	0	k__Bacteria; p__Bacteroidetes; c__Bacteroidia; o__Bacteroidales; f__Muribaculaceae; g__uncultured bacterium; s__uncultured bacterium
OTU_1284	0	0	0	0	0	0	0	0	3	0	0	1	0	k__Bacteria; p__Bacteroidetes; c__Bacteroidia; o__Bacteroidales; f__Muribaculaceae; g__uncultured bacterium; s__uncultured bacterium
OTU_284	1	25	5	0	0	6	16	100	0	3	1	0	0	k__Bacteria; p__Firmicutes; c__Clostridia; o__Clostridiales; f__Ruminococcaceae; g__Ruminococcaceae UCG-014; s__unidentified
OTU_1998	0	0	0	0	0	0	0	0	0	0	0	0	0	k__Bacteria; p__Bacteroidetes; c__Bacteroidia
OTU_364	0	8	2	19	6	24	0	0	0	13	2	0	0	k__Bacteria; p__Firmicutes; c__Clostridia; o__Clostridiales; f__Lachnospiraceae
OTU_1038	2	0	6	0	5	0	0	0	0	0	0	5	1	k__Bacteria; p__Bacteroidetes; c__Bacteroidia; o__Bacteroidales; f__Muribaculaceae; g__uncultured bacterium; s__uncultured bacterium
OTU_195	0	125	1	0	0	129	462	83	0	0	0	1	0	k__Bacteria; p__Firmicutes; c__Clostridia; o__Clostridiales; f__Lachnospiraceae
OTU_2424	0	2	2	0	0	0	0	0	0	1	0	0	0	k__Bacteria; p__Bacteroidetes; c__Bacteroidia; o__Bacteroidales; f__Muribaculaceae; g__uncultured bacterium; s__uncultured bacterium
OTU_2930	0	0	0	0	0	0	0	0	0	0	0	0	0	k__Bacteria; p__Firmicutes; c__Clostridia; o__Clostridiales
OTU_1458	5	5	14	0	5	0	0	0	3	3	1	74	60	k__Bacteria; p__Bacteroidetes; c__Bacteroidia; o__Bacteroidales; f__Muribaculaceae; g__uncultured bacterium; s__uncultured bacterium
OTU_2885	1	0	2	0	9	0	0	0	1	2	2	5	0	k__Bacteria; p__Bacteroidetes; c__Bacteroidia; o__Bacteroidales; f__Muribaculaceae; g__uncultured bacterium; s__uncultured bacterium
OTU_2820	0	0	0	0	0	0	0	0	0	0	0	0	0	k__Bacteria; p__Bacteroidetes; c__Bacteroidia; o__Bacteroidales; f__Muribaculaceae; g__uncultured bacterium; s__uncultured bacterium
OTU_1255	10	4	9	3	2	0	0	0	1	8	0	13	10	k__Bacteria; p__Bacteroidetes; c__Bacteroidia; o__Bacteroidales
OTU_337	1	2	14	4	0	0	0	55	36	8	0	4	10	k__Bacteria; p__Firmicutes; c__Erysipelotrichia; o__Erysipelotrichales; f__Erysipelotrichaceae; g__uncultured bacterium; s__uncultured bacterium
OTU_1226	1	4	0	0	1	0	0	0	0	3	0	0	0	k__Bacteria; p__Bacteroidetes; c__Bacteroidia; o__Bacteroidales; f__Bacteroidaceae; g__Bacteroides
OTU_682	0	7	2	1	8	8	11	3	1	0	3	2	1	k__Bacteria; p__Firmicutes; c__Clostridia; o__Clostridiales; f__Family XI; g__Anaerococcus; s__uncultured bacterium
OTU_2563	1	13	10	1	1	5	0	0	0	14	9	3	3	k__Bacteria; p__Bacteroidetes; c__Bacteroidia; o__Bacteroidales; f__Muribaculaceae; g__uncultured bacterium; s__uncultured bacterium
OTU_2650	11	24	12	7	1	2	0	0	1	1	0	1	0	k__Bacteria; p__Bacteroidetes; c__Bacteroidia; o__Bacteroidales; f__Muribaculaceae; g__uncultured bacterium; s__uncultured bacterium
OTU_263	0	0	0	0	0	0	0	5	1	0	1	0	0	k__Bacteria; p__Firmicutes; c__Clostridia; o__Clostridiales; f__Lachnospiraceae
OTU_2985	4	0	1	0	0	0	0	0	12	2	0	1	0	k__Bacteria; p__Bacteroidetes; c__Bacteroidia; o__Bacteroidales; f__Muribaculaceae; g__uncultured bacterium; s__uncultured bacterium
OTU_640	8	0	0	0	0	14	0	7	0	0	0	0	4	k__Bacteria; p__Firmicutes; c__Clostridia; o__Clostridiales; f__Ruminococcaceae; g__Ruminococcaceae UCG-014
OTU_381	0	1	0	0	1	0	114	0	0	0	0	0	2	k__Bacteria; p__Firmicutes; c__Clostridia; o__Clostridiales; f__Lachnospiraceae; g__Dorea; s__uncultured bacterium
OTU_1434	0	0	0	0	0	0	0	0	0	0	0	0	0	k__Bacteria; p__Bacteroidetes; c__Bacteroidia; o__Bacteroidales
OTU_319	1	3	0	0	0	6	78	25	0	1	2	0	0	k__Bacteria; p__Firmicutes; c__Negativicutes; o__Selenomonadales; f__Acidaminococcaceae; g__Phascolarctobacterium; s__uncultured organism
OTU_62	20	178	11	2	0	2	0	1497	5	1	0	0	0	k__Bacteria; p__Firmicutes; c__Clostridia; o__Clostridiales; f__Ruminococcaceae; g__Ruminococcaceae UCG-014; s__uncultured rumen bacterium
OTU_1263	0	0	0	0	0	0	0	0	0	0	0	0	0	k__Bacteria
OTU_2677	0	0	2	0	0	0	0	0	2	0	0	3	0	k__Bacteria; p__Bacteroidetes; c__Bacteroidia; o__Bacteroidales; f__Muribaculaceae; g__uncultured bacterium; s__uncultured bacterium
OTU_2460	0	0	0	0	0	0	0	0	0	0	0	0	0	k__Bacteria; p__Bacteroidetes; c__Bacteroidia; o__Bacteroidales; f__Muribaculaceae; g__uncultured bacterium; s__uncultured bacterium
OTU_2208	1	0	2	1	0	0	0	0	0	6	0	3	3	k__Bacteria; p__Bacteroidetes; c__Bacteroidia; o__Bacteroidales; f__Muribaculaceae; g__uncultured bacterium; s__uncultured bacterium
OTU_1673	7	12	12	1	7	0	0	0	10	5	1	31	9	k__Bacteria; p__Bacteroidetes; c__Bacteroidia; o__Bacteroidales; f__Muribaculaceae; g__uncultured bacterium; s__uncultured bacterium
OTU_1657	0	0	1	0	0	0	0	0	4	0	0	0	0	k__Bacteria; p__Bacteroidetes; c__Bacteroidia; o__Bacteroidales; f__Muribaculaceae; g__uncultured bacterium; s__uncultured bacterium
OTU_2929	0	0	0	0	0	0	0	0	1	0	0	0	0	k__Bacteria; p__Bacteroidetes; c__Bacteroidia; o__Bacteroidales
OTU_2772	7	0	11	0	11	1	0	1	4	1	2	14	0	k__Bacteria; p__Bacteroidetes; c__Bacteroidia; o__Bacteroidales
OTU_1300	1	0	0	0	2	0	0	0	0	0	0	0	0	k__Bacteria; p__Bacteroidetes; c__Bacteroidia; o__Bacteroidales; f__Muribaculaceae; g__uncultured bacterium; s__uncultured bacterium
OTU_377	0	0	2	1	0	0	0	1	0	0	0	0	0	k__Bacteria; p__Proteobacteria; c__Gammaproteobacteria; o__Betaproteobacteriales; f__Burkholderiaceae; g__Schlegelella; s__uncultured bacterium
OTU_2919	0	0	0	0	0	0	0	0	0	0	0	0	0	k__Bacteria
OTU_2218	0	0	0	0	0	0	0	0	0	0	0	0	0	k__Bacteria; p__Bacteroidetes; c__Bacteroidia; o__Bacteroidales
OTU_646	0	0	0	0	0	0	0	0	0	0	0	0	0	k__Bacteria; p__Firmicutes; c__Clostridia; o__Clostridiales; f__Peptostreptococcaceae; g__Peptoclostridium; s__uncultured bacterium
OTU_745	0	0	0	0	0	0	0	1	0	0	0	0	0	k__Bacteria; p__Firmicutes; c__Clostridia; o__Clostridiales; f__Ruminococcaceae; g__Ruminococcaceae UCG-013
OTU_2617	0	0	0	0	0	0	0	0	0	0	0	0	0	k__Bacteria; p__Bacteroidetes; c__Bacteroidia; o__Bacteroidales; f__Rikenellaceae; g__Alistipes
OTU_374	2	0	0	62	7	10	0	1	0	0	0	0	0	k__Bacteria; p__Firmicutes; c__Clostridia; o__Clostridiales; f__Ruminococcaceae; g__Ruminococcaceae UCG-005; s__uncultured bacterium
OTU_207	0	0	0	0	0	0	53	31	0	0	1	0	0	k__Bacteria; p__Bacteroidetes; c__Bacteroidia; o__Bacteroidales; f__Muribaculaceae; g__uncultured bacterium; s__uncultured bacterium
OTU_1218	9	3	20	1	28	1	3	0	3	6	10	11	7	k__Bacteria; p__Bacteroidetes; c__Bacteroidia; o__Bacteroidales; f__Muribaculaceae
OTU_2940	20	4	5	138	22	39	0	0	0	95	11	20	7	k__Bacteria; p__Bacteroidetes; c__Bacteroidia; o__Bacteroidales; f__Bacteroidaceae; g__Bacteroides; s__Bacteroides acidifaciens
OTU_1817	3	0	0	0	0	0	0	0	0	0	1	0	1	k__Bacteria; p__Bacteroidetes; c__Bacteroidia; o__Bacteroidales; f__Muribaculaceae; g__uncultured bacterium; s__uncultured bacterium
OTU_1433	0	2	0	0	0	0	0	0	0	0	0	0	1	k__Bacteria
OTU_2391	2	0	0	0	3	0	0	0	0	0	0	4	0	k__Bacteria; p__Bacteroidetes; c__Bacteroidia; o__Bacteroidales; f__Muribaculaceae; g__uncultured bacterium; s__uncultured bacterium
OTU_1923	0	0	0	0	0	0	0	0	0	0	0	0	0	k__Bacteria; p__Bacteroidetes; c__Bacteroidia; o__Bacteroidales; f__Muribaculaceae; g__uncultured bacterium; s__uncultured bacterium
OTU_2971	1	0	1	0	3	1	0	0	0	0	0	4	2	k__Bacteria; p__Bacteroidetes; c__Bacteroidia; o__Bacteroidales; f__Muribaculaceae; g__uncultured bacterium; s__uncultured bacterium
OTU_1326	0	0	0	0	0	0	0	0	0	0	0	0	0	k__Bacteria; p__Bacteroidetes; c__Bacteroidia; o__Bacteroidales
OTU_1045	0	2	0	3	0	0	29	0	0	1	0	0	2	k__Bacteria; p__Firmicutes; c__Clostridia; o__Clostridiales; f__Lachnospiraceae
OTU_2143	3	0	0	0	0	1	0	0	1	0	0	2	0	k__Bacteria; p__Firmicutes; c__Clostridia; o__Clostridiales; f__Ruminococcaceae
OTU_436	3	16	0	0	0	3	0	0	0	0	0	0	0	k__Bacteria; p__Firmicutes; c__Clostridia; o__Clostridiales; f__Lachnospiraceae; g__uncultured; s__uncultured bacterium
OTU_813	0	0	1	0	1	0	0	0	5	0	0	1	0	k__Bacteria; p__Firmicutes; c__Clostridia; o__Clostridiales; f__Christensenellaceae; g__Catabacter; s__Christensenella timonensis
OTU_2436	4	18	0	0	3	3	0	0	0	13	11	5	2	k__Bacteria; p__Bacteroidetes; c__Bacteroidia; o__Bacteroidales
OTU_2996	0	0	0	0	0	0	0	0	0	0	0	0	0	k__Bacteria; p__Bacteroidetes; c__Bacteroidia; o__Bacteroidales
OTU_1670	0	0	0	0	0	0	0	0	0	0	0	0	0	k__Bacteria
OTU_2115	0	0	0	0	1	0	0	0	0	0	0	1	0	k__Bacteria; p__Bacteroidetes; c__Bacteroidia; o__Bacteroidales; f__Muribaculaceae; g__uncultured bacterium; s__uncultured bacterium
OTU_78	11	2	9	8	10	6	1747	13	7	19	4	10	3	k__Bacteria; p__Bacteroidetes; c__Bacteroidia; o__Bacteroidales; f__Bacteroidaceae; g__Bacteroides
OTU_2900	0	0	0	0	0	0	0	0	0	0	0	0	0	k__Bacteria; p__Firmicutes; c__Clostridia; o__Clostridiales; f__Lachnospiraceae
OTU_2026	15	2	12	1	51	0	0	0	8	5	3	37	14	k__Bacteria; p__Bacteroidetes; c__Bacteroidia; o__Bacteroidales; f__Muribaculaceae; g__uncultured bacterium; s__uncultured bacterium
OTU_2522	0	1	0	0	0	0	0	0	0	0	0	0	0	k__Bacteria; p__Bacteroidetes; c__Bacteroidia; o__Bacteroidales
OTU_1769	24	1	1	15	13	17	0	0	1	7	4	1	0	k__Bacteria; p__Bacteroidetes; c__Bacteroidia; o__Bacteroidales; f__Muribaculaceae; g__Muribaculum
OTU_2239	13	36	9	0	0	0	0	0	12	5	5	1	6	k__Bacteria; p__Bacteroidetes; c__Bacteroidia; o__Bacteroidales; f__Muribaculaceae; g__uncultured bacterium; s__uncultured bacterium
OTU_2812	0	0	0	0	0	0	0	0	0	0	0	0	0	k__Bacteria; p__Bacteroidetes; c__Bacteroidia; o__Bacteroidales; f__Muribaculaceae
OTU_2610	3	0	3	3	1	1	0	0	0	1	0	0	3	k__Bacteria; p__Bacteroidetes; c__Bacteroidia; o__Bacteroidales
OTU_2679	4	4	3	0	6	3	0	0	0	3	1	1	1	k__Bacteria; p__Bacteroidetes; c__Bacteroidia; o__Bacteroidales
OTU_2241	0	16	2	2	2	0	0	0	0	0	1	0	0	k__Bacteria; p__Bacteroidetes; c__Bacteroidia; o__Bacteroidales; f__Muribaculaceae
OTU_2910	0	0	0	0	0	0	0	0	0	0	0	0	0	k__Bacteria; p__Bacteroidetes; c__Bacteroidia; o__Bacteroidales; f__Muribaculaceae
OTU_1615	0	0	0	0	0	0	0	0	0	0	0	0	0	k__Bacteria; p__Bacteroidetes; c__Bacteroidia; o__Bacteroidales
OTU_1738	9	6	16	2	52	0	1	0	3	6	5	64	4	k__Bacteria; p__Bacteroidetes; c__Bacteroidia; o__Bacteroidales
OTU_1043	3	0	1	1	6	0	0	0	25	5	20	4	4	k__Bacteria; p__Bacteroidetes; c__Bacteroidia; o__Bacteroidales; f__Muribaculaceae; g__uncultured bacterium; s__uncultured bacterium
OTU_2313	8	9	10	1	13	1	0	0	1	7	1	4	11	k__Bacteria; p__Bacteroidetes; c__Bacteroidia; o__Bacteroidales; f__Muribaculaceae; g__uncultured bacterium; s__uncultured bacterium
OTU_1141	0	0	0	0	0	0	0	0	0	0	0	0	0	k__Bacteria
OTU_2943	0	0	0	0	0	0	0	0	0	0	0	0	0	k__Bacteria; p__Bacteroidetes; c__Bacteroidia; o__Bacteroidales; f__Bacteroidaceae; g__Bacteroides
OTU_1616	0	0	0	0	0	0	0	0	0	0	0	0	0	k__Bacteria; p__Bacteroidetes; c__Bacteroidia; o__Bacteroidales; f__Bacteroidaceae; g__Bacteroides
OTU_1968	14	61	29	3	104	3	2	2	26	23	22	92	11	k__Bacteria; p__Bacteroidetes; c__Bacteroidia; o__Bacteroidales; f__Muribaculaceae; g__uncultured bacterium; s__uncultured bacterium
OTU_1544	8	0	8	0	0	0	0	0	2	1	0	4	4	k__Bacteria; p__Bacteroidetes; c__Bacteroidia; o__Bacteroidales; f__Muribaculaceae; g__uncultured bacterium; s__uncultured bacterium
OTU_1124	1	2	0	0	2	0	0	0	21	0	0	2	0	k__Bacteria
OTU_1879	0	1	0	1	0	4	0	0	0	0	0	0	0	k__Bacteria; p__Bacteroidetes; c__Bacteroidia; o__Bacteroidales; f__Bacteroidaceae; g__Bacteroides
OTU_2858	0	0	0	0	0	0	0	0	1	0	0	0	0	k__Bacteria; p__Bacteroidetes; c__Bacteroidia; o__Bacteroidales; f__Muribaculaceae
OTU_140	0	90	1	1	0	207	0	2	0	50	0	1	5	k__Bacteria; p__Firmicutes; c__Clostridia; o__Clostridiales; f__Lachnospiraceae
OTU_1145	1	2	2	0	0	0	0	0	0	0	0	1	2	k__Bacteria; p__Bacteroidetes; c__Bacteroidia; o__Bacteroidales; f__Muribaculaceae; g__uncultured bacterium; s__uncultured bacterium
OTU_2196	0	0	0	0	0	0	0	0	0	0	0	0	0	k__Bacteria; p__Bacteroidetes; c__Bacteroidia; o__Bacteroidales; f__Muribaculaceae; g__uncultured bacterium; s__uncultured bacterium
OTU_2606	0	0	0	0	0	0	0	0	1	0	0	1	0	k__Bacteria; p__Bacteroidetes; c__Bacteroidia; o__Bacteroidales; f__Muribaculaceae; g__uncultured bacterium; s__uncultured bacterium
OTU_1375	0	0	0	0	0	0	0	0	0	0	0	0	0	k__Bacteria
OTU_2056	0	0	1	0	1	0	4	0	0	0	0	1	0	k__Bacteria; p__Bacteroidetes; c__Bacteroidia; o__Bacteroidales
OTU_2033	0	4	0	0	0	1	0	0	0	0	0	0	1	k__Bacteria; p__Bacteroidetes; c__Bacteroidia; o__Bacteroidales; f__Muribaculaceae
OTU_2638	1	0	1	0	0	0	0	0	0	0	0	5	1	k__Bacteria; p__Bacteroidetes; c__Bacteroidia; o__Bacteroidales; f__Muribaculaceae; g__uncultured bacterium; s__uncultured bacterium
OTU_3023	0	0	0	0	0	0	0	0	0	0	0	0	0	k__Bacteria; p__Bacteroidetes; c__Bacteroidia; o__Bacteroidales; f__Bacteroidaceae; g__Bacteroides
OTU_1822	0	7	0	0	0	0	0	0	0	0	0	0	0	k__Bacteria; p__Firmicutes; c__Clostridia; o__Clostridiales; f__Ruminococcaceae
OTU_1239	4	16	1	69	0	5	0	6	4	0	2	2	0	k__Bacteria; p__Firmicutes; c__Clostridia; o__Clostridiales; f__Lachnospiraceae
OTU_2498	0	0	0	0	0	0	0	0	0	0	0	0	0	k__Bacteria; p__Bacteroidetes; c__Bacteroidia; o__Bacteroidales; f__Muribaculaceae; g__uncultured bacterium; s__uncultured bacterium
OTU_1766	0	2	0	0	0	0	0	0	0	0	0	0	0	k__Bacteria
OTU_2353	0	1	1	0	0	0	0	0	0	1	3	8	0	k__Bacteria; p__Bacteroidetes; c__Bacteroidia; o__Bacteroidales; f__Muribaculaceae; g__uncultured bacterium; s__uncultured bacterium
OTU_529	0	0	0	2	0	0	9	8	0	0	1	0	0	k__Bacteria; p__Firmicutes; c__Clostridia; o__Clostridiales; f__Lachnospiraceae; g__[Eubacterium] hallii group; s__uncultured bacterium
OTU_441	6	0	1	3	3	4	0	0	2	3	2	3	6	k__Bacteria; p__Firmicutes; c__Clostridia; o__Clostridiales; f__Family XIII; g__Family XIII AD3011 group
OTU_1884	0	0	0	0	0	0	0	0	0	0	0	0	0	k__Bacteria; p__Bacteroidetes; c__Bacteroidia; o__Bacteroidales; f__Muribaculaceae
OTU_1637	0	0	0	0	0	0	0	0	0	1	0	0	0	k__Bacteria; p__Bacteroidetes; c__Bacteroidia; o__Bacteroidales; f__Muribaculaceae; g__uncultured bacterium; s__uncultured bacterium
OTU_803	0	0	0	0	0	0	2	25	0	0	0	0	0	k__Bacteria; p__Firmicutes; c__Clostridia; o__Clostridiales; f__Ruminococcaceae; g__Ruminococcaceae UCG-014
OTU_2852	0	0	0	0	0	0	0	0	0	0	0	0	0	k__Bacteria
OTU_2907	0	0	0	0	0	0	0	0	0	0	0	0	0	k__Bacteria; p__Bacteroidetes; c__Bacteroidia; o__Bacteroidales; f__Muribaculaceae; g__uncultured bacterium; s__uncultured bacterium
OTU_1694	21	2	1	1	1	0	0	0	32	0	7	0	0	k__Bacteria; p__Bacteroidetes; c__Bacteroidia; o__Bacteroidales; f__Muribaculaceae; g__uncultured bacterium; s__uncultured bacterium
OTU_2804	0	0	0	0	0	0	0	0	0	0	0	0	0	k__Bacteria; p__Bacteroidetes; c__Bacteroidia; o__Bacteroidales; f__Muribaculaceae; g__uncultured bacterium; s__uncultured bacterium
OTU_2481	0	0	0	0	0	0	0	0	0	0	0	0	0	k__Bacteria; p__Bacteroidetes; c__Bacteroidia; o__Bacteroidales; f__Muribaculaceae; g__uncultured bacterium; s__uncultured bacterium
OTU_1829	1	48	4	4	1	1	0	1	2	4	9	0	3	k__Bacteria; p__Bacteroidetes; c__Bacteroidia; o__Bacteroidales; f__Muribaculaceae; g__uncultured bacterium; s__uncultured bacterium
OTU_1183	0	0	0	0	0	0	0	0	0	0	0	0	0	k__Bacteria; p__Firmicutes; c__Clostridia; o__Clostridiales; f__Ruminococcaceae
OTU_971	0	0	0	0	0	2	1	1	0	0	0	0	1	k__Bacteria; p__Actinobacteria; c__Actinobacteria; o__Micrococcales; f__Dermabacteraceae; g__Dermabacter
OTU_2235	0	0	0	0	0	0	0	0	0	0	0	0	0	k__Bacteria; p__Bacteroidetes; c__Bacteroidia; o__Bacteroidales; f__Muribaculaceae; g__uncultured bacterium; s__uncultured bacterium
OTU_289	3	0	0	27	0	0	153	0	12	0	0	0	0	k__Bacteria; p__Firmicutes; c__Erysipelotrichia; o__Erysipelotrichales; f__Erysipelotrichaceae; g__[Clostridium] innocuum group; s__uncultured bacterium
OTU_2203	0	0	0	0	0	0	0	0	0	0	0	3	0	k__Bacteria; p__Bacteroidetes; c__Bacteroidia; o__Bacteroidales; f__Muribaculaceae; g__uncultured bacterium; s__uncultured bacterium
OTU_1073	4	1	1	67	0	36	0	0	0	23	0	1	0	k__Bacteria; p__Bacteroidetes; c__Bacteroidia; o__Bacteroidales
OTU_2848	0	0	0	0	0	0	0	0	0	0	0	0	0	k__Bacteria; p__Bacteroidetes; c__Bacteroidia; o__Bacteroidales; f__Muribaculaceae; g__uncultured bacterium; s__uncultured bacterium
OTU_975	0	0	0	0	0	0	0	0	0	0	0	0	0	k__Bacteria; p__Cyanobacteria; c__Oxyphotobacteria; o__Chloroplast; f__Vischeria sp. CAUP Q 202; g__Vischeria sp. CAUP Q 202; s__Vischeria sp. CAUP Q 202
OTU_2336	0	0	0	0	0	0	0	0	0	0	0	0	0	k__Bacteria; p__Bacteroidetes; c__Bacteroidia; o__Bacteroidales; f__Muribaculaceae; g__uncultured bacterium; s__uncultured bacterium
OTU_1490	0	0	1	0	7	0	0	0	1	1	0	4	0	k__Bacteria; p__Bacteroidetes; c__Bacteroidia; o__Bacteroidales; f__Muribaculaceae; g__uncultured bacterium; s__uncultured bacterium
OTU_1960	0	0	0	0	2	2	0	0	0	3	0	0	1	k__Bacteria; p__Bacteroidetes; c__Bacteroidia; o__Bacteroidales; f__Bacteroidaceae; g__Bacteroides
OTU_224	0	11	0	0	0	5	651	2	0	2	0	0	0	k__Bacteria; p__Firmicutes; c__Clostridia; o__Clostridiales; f__Lachnospiraceae; g__Roseburia; s__uncultured bacterium
OTU_233	0	3	0	0	0	25	0	1	0	0	0	0	0	k__Bacteria; p__Firmicutes; c__Clostridia; o__Clostridiales; f__Lachnospiraceae; g__uncultured; s__uncultured bacterium
OTU_2568	0	0	0	0	0	0	0	0	0	0	0	0	0	k__Bacteria; p__Proteobacteria; c__Gammaproteobacteria; o__Oceanospirillales; f__Endozoicomonadaceae; g__Endozoicomonas; s__Candidatus Endonucleobacter bathymodioli
OTU_390	0	14	0	0	1	4	73	0	0	0	0	0	1	k__Bacteria; p__Firmicutes; c__Clostridia; o__Clostridiales; f__Ruminococcaceae; g__Negativibacillus; s__uncultured bacterium
OTU_1360	0	0	0	0	0	0	0	0	0	0	0	0	0	k__Bacteria; p__Bacteroidetes; c__Bacteroidia; o__Bacteroidales; f__Muribaculaceae; g__uncultured bacterium; s__uncultured bacterium
OTU_1853	0	0	0	0	0	0	0	0	0	0	0	0	0	k__Bacteria
OTU_2258	0	0	1	0	0	0	0	0	0	0	0	1	0	k__Bacteria; p__Bacteroidetes; c__Bacteroidia; o__Bacteroidales
OTU_1350	0	0	2	0	0	0	0	0	0	0	0	3	0	k__Bacteria; p__Bacteroidetes; c__Bacteroidia; o__Bacteroidales; f__Muribaculaceae; g__uncultured bacterium; s__uncultured bacterium
OTU_1197	0	0	0	0	0	0	0	0	0	0	0	0	0	k__Bacteria; p__Firmicutes; c__Erysipelotrichia; o__Erysipelotrichales; f__Erysipelotrichaceae; g__Catenibacterium; s__uncultured bacterium
OTU_957	1	29	1	0	0	52	0	1	0	1	0	0	0	k__Bacteria; p__Firmicutes; c__Clostridia; o__Clostridiales; f__Lachnospiraceae; g__Lachnospiraceae NK4A136 group; s__uncultured bacterium
OTU_2338	0	0	3	0	5	0	0	0	0	2	0	2	0	k__Bacteria; p__Bacteroidetes; c__Bacteroidia; o__Bacteroidales; f__Muribaculaceae; g__uncultured bacterium; s__uncultured bacterium
[truncated: 2,289 more rows]
